# Supplementary material for: Creation of Novel Protein Variants with CRISPR/Cas9-Mediated Mutagenesis: Turning a Screening By-Product into a Discovery Tool
Source: PLoS One. 2017 Jan 24;12(1):e0170445. doi: 10.1371/journal.pone.0170445 (PMC5261743; doi:10.1371/journal.pone.0170445)
Supplement: S1 Table — (XLSX) [file pone.0170445.s003.xlsx]

## Sheet: Sequencing
		A375	A375	A375		A375	A375	A375		A375
		sgMAP2K1	sgMAP2K1	sgEGFP		sgMAP2K1	sgMAP2K1	sgEGFP		sgMAP2K1
		Vemurafenib	no drug	no drug		Vemurafenib	no drug	no drug		Vemurafenib
Sequence	Translation	SUM	SUM	SUM		RPM	RPM	RPM		Fold Enrichment	Note
CTTGAGGCCTTTCTTACCCAGAAGCAGAAGGTGGGAGAACTGAAGGATGACGACTTTGAGAA	LEAFLTQKQKVGELKDDDFE	55137	437145	2345402		19908.5	384114	849968		0.0518295	wild-type
CTTGAGGCCTTTCTTACCCAGAAGCAGAAAGGTGGGAGAACTGAAGGATGACGACTTTGAGA	LEAFLTQKQKGGRTEG*RL*	285290	105201	11		103010	92438.9	3.98637		1.11436
CTTGAGGCCTTTCTTACCCAGAAGCAGGTGGGAGAACTGAAGGATGACGACTTTGAGAAGAT	LEAFLTQKQVGELKDDDFEK	269679	99479	6		97373.7	87411	2.17438		1.11397
CTTGAGGCCTTTCTTACCCAGAAGCAGAGGTGGGAGAACTGAAGGATGACGACTTTGAGAAG	LEAFLTQKQRWEN*RMTTLR	97552	33982	137		35223.4	29859.6	49.6485		1.17963
CTTGAGGCCTTTCTTACCCAGAAGCAGAACTGAAGGATGACGACTTTGAGAAGATCAGTGAG	LEAFLTQKQN*RMTTLRRSV	31699	27789	0		11445.6	24417.9	0		0.46874
CTTGAGGCCTTTCTTACCCAGAAGGTGGGAGAACTGAAGGATGACGACTTTGAGAAGATCAG	LEAFLTQKVGELKDDDFEKI	66654	26422	0		24066.9	23216.7	0		1.03662
CTTGAGGCCTTTCTTACCCAGAAGCAGAGAACTGAAGGATGACGACTTTGAGAAGATCAGTG	LEAFLTQKQRTEG*RL*EDQ	29525	13353	1		10660.7	11733.1	0.362397		0.908596
CTTGAGGCCTTTCTTACCCAGGTGGGAGAACTGAAGGATGACGACTTTGAGAAGATCAGTGA	LEAFLTQVGELKDDDFEKIS	54478	12062	0		19670.5	10598.7	0		1.85593
CTTGAGGCCTTTCTTACCCAGAACTGAAGGATGACGACTTTGAGAAGATCAGTGAGAGATCG	LEAFLTQN*RMTTLRRSVRD	144977	11473	1		52347.2	10081.2	0.362397		5.19256
CTTGAGGCCTTTCTTACCCAGAAGGATGACGACTTTGAGAAGATCAGTGAGAGATCGGAAGA	LEAFLTQKDDDFEKISERSE	2343	9599	1		845.993	8434.53	0.362397		0.100301
CTTGAGGTGGGAGAACTGAAGGATGACGACTTTGAGAAGATCAGTGAGAGATCGGAAGAGCA	LEVGELKDDDFEKISERSEE	6699	5926	1		2418.83	5207.11	0.362397		0.464524
CTTGAGGCCTTTCTTACCCAGAGATAGAAGGTGGGAGAACTAAAGGATGACGACTTTGAGAA	LEAFLTQR*KVGELKDDDFE	23731	5173	25478		8568.61	4545.45	9233.16		1.8851
CTTGAGGCCTTTCTTACCCAGAAGCAGACAGGTGGGAGAACTGAAGGATGACGACTTTGAGA	LEAFLTQKQTGGRTEG*RL*	7802	4913	0		2817.09	4317	0		0.652558
CTTGAGGCCTTTCTTACCCAGAAGCAGAAGGATGACGACTTTGAGAAGATCAGTGAGAGATC	LEAFLTQKQKDDDFEKISER	8972	4877	0		3239.54	4285.36	0		0.755955
CTTGAGGCCTTTCTTACCCAGAAGAACTGAAGGATGACGACTTTGAGAAGATCAGTGAGAGA	LEAFLTQKN*RMTTLRRSVR	15816	4159	0		5710.72	3654.46	0		1.56267
CTTGAGGCCTTTCTTACCCAGAAGCAGTGGGAGAACTGAAGGATGACGACTTTGAGAAGATC	LEAFLTQKQWEN*RMTTLRR	4976	4078	0		1796.7	3583.29	0		0.50141
CTTGAGGCCTTTCTTACCCAGAAGCAGGATGACGACTTTGAGAAGATCAGTGAGAGATCGGA	LEAFLTQKQDDDFEKISERS	320	3627	0		115.543	3187	0		0.0362545
CTTGAGGCCTTTCTTACCCAGAAGCAGATGGGAGAACTGAAGGATGACGACTTTGAGAAGAT	LEAFLTQKQMGELKDDDFEK	5655	3541	0		2041.87	3111.44	0		0.656246
CTTGAGGCCTTTCTTACCCAGAAGCAGAGTGGGAGAACTGAAGGATGACGACTTTGAGAAGA	LEAFLTQKQSGRTEG*RL*E	15305	3301	0		5526.22	2900.55	0		1.90523
CTTGAGGCCTTTCTTACCCAGAAGCAGAGAGGTGGGAGAACTGAAGGATGACGACTTTGAGA	LEAFLTQKQRGGRTEG*RL*	2432	3267	0		878.129	2870.67	0		0.305896
CTTGAGGCCTTTCTTACCCAGAAGCAGAAGGAGGGAGAACTGAAGGATGACGACTTTGAGAA	LEAFLTQKQKEGELKDDDFE	637	2824	3941		230.003	2481.42	1428.21		0.0926903
CTTGAGGCCTTTCTTACCCAGAAGCACTGAAGGATGACGACTTTGAGAAGATCAGTGAGAGA	LEAFLTQKH*RMTTLRRSVR	3966	2765	0		1432.01	2429.57	0		0.58941
CTTGAGGCCTTTCTTACCCAGAAGCAAGGTGGGAGAACTGAAGGATGACGACTTTGAGAAGA	LEAFLTQKQGGRTEG*RL*E	790	2595	2		285.247	2280.2	0.724795		0.125098
CTTGAGGCCTTTCTTACCCAGAAGCAGAGAGAACTGAAGGATGACGACTTTGAGAAGATCAG	LEAFLTQKQRELKDDDFEKI	995	2589	1		359.267	2274.92	0.362397		0.157925
CTTGAGGCCTTTCTTACCCAGAAGCAGATAGGTGGGAGAACTGAAGGATGACGACTTTGAGA	LEAFLTQKQIGGRTEG*RL*	2083	2441	0		752.114	2144.88	0		0.350656
CTTGAGGCCTTTCTTACCCAGAAGCAGAAGGTGGGAGAACTAAAGGATGACGACTTTGAGAA	LEAFLTQKQKVGELKDDDFE	625	2345	16474		225.67	2060.52	5970.14		0.109521
CTTGAGGCCTTTCTTACCCAGAAGAAGGTGGGAGAACTGAAGGATGACGACTTTGAGAAGAT	LEAFLTQKKVGELKDDDFEK	671	2268	0		242.28	1992.87	0		0.121574
CTTGAGGCCTTTCTTACCCAGAAGCAGAGGGTGGGAGAACTGAAGGATGACGACTTTGAGAA	LEAFLTQKQRVGELKDDDFE	316	2230	6558		114.099	1959.47	2376.6		0.0582293
CTTGAGGCCTTTCTTACCCAGAAGCAGAAGGTGGGAGAACTGAAGGATGACGACTTTGAGAG	LEAFLTQKQKVGELKDDDFE	274	2123	10415		98.9339	1865.46	3774.37		0.0530347
CTTGAGGCCTTTCTTACCCAGAAGCAGACTGAAGGATGACGACTTTGAGAAGATCAGTGAGA	LEAFLTQKQTEG*RL*EDQ*	1221	2050	0		440.87	1801.31	0		0.244749
CTTGAGGCCTTTCTTACCCAGAGAACTGAAGGATGACGACTTTGAGAAGATCAGTGAGAGAT	LEAFLTQRTEG*RL*EDQ*E	735	2036	0		265.388	1789.01	0		0.148344
CTTGAGGCCTTTCTGAAGGATGACGACTTTGAGAAGATCAGTGAGAGATCGGAAGAGCACAC	LEAFLKDDDFEKISERSEEH	71	1919	0		25.6362	1686.2	0		0.0152035
CTTGAGGCCTTTCTTACCCTGAAGGATGACGACTTTGAGAAGATCAGTGAGAGATCGGAAGA	LEAFLTLKDDDFEKISERSE	746	1895	0		269.36	1665.11	0		0.161767
CTTGAGGCCTTTCTTACCCAGAAAGGTGGGAGAACTGAAGGATGACGACTTTGAGAAGATCA	LEAFLTQKGGRTEG*RL*ED	2736	1876	1		987.895	1648.42	0.362397		0.599298
CTTGAGGCCTTTCTTACCCAGAAGCAGAAGAACTGAAGGATGACGACTTTGAGAAGATCAGT	LEAFLTQKQKN*RMTTLRRS	14259	1765	0		5148.53	1550.88	0		3.31974
CTTGAGGCCTTTCTTACCCAGAAGCAGATGACGACTTTGAGAAGATCAGTGAGAGATCGGAA	LEAFLTQKQMTTLRRSVRDR	1496	1660	0		540.165	1458.62	0		0.370325
CTTGAGGCCTTTCTTACCCAGAAGCAGAAAGGAGGGAGAACTGAAGGATGACGACTTTGAGA	LEAFLTQKQKGGRTEG*RL*	2120	1613	0		765.474	1417.32	0		0.540084
CTTGAGGCCTTTCTTACCCAGAAGCAGAAGGTGGGAGAACTGAAGGATGACGACTTTGAAAG	LEAFLTQKQKVGELKDDDFE	283	1605	8444		102.184	1410.29	3060.08		0.0724555
CTTGAGGCCTTTCTTACCCAGAAGTGGGAGAACTGAAGGATGACGACTTTGAGAAGATCAGT	LEAFLTQKWEN*RMTTLRRS	1373	1564	0		495.753	1374.27	0		0.360739
CTTGAGGCCTTTCTTACCCAGAAGCTTCTGGGAGAACTGAAGGATGACGACTTTGAGAAGAT	LEAFLTQKLLGELKDDDFEK	2735	1560	0		987.534	1370.75	0		0.720431
CTTGAGGCCTTTCTTACCCAGAAGCATGACGACTTTGAGAAGATCAGTGAGAGATCGGAAGA	LEAFLTQKHDDFEKISERSE	250	1553	1		90.2682	1364.6	0.362397		0.0661498
CTTGAGGCCTTTCTTACCCAGAGGCAGAAGGTGGGAGAACTGAAGGATGACGACTTTGAGAA	LEAFLTQRQKVGELKDDDFE	326	1436	9100		117.71	1261.8	3297.82		0.0932874
CTTGAGGCCTTTCTTACCCAGAAGCAGGAGGTGGGAGAACTGAAGGATGACGACTTTGAGAA	LEAFLTQKQEVGELKDDDFE	171	1435	5170		61.7434	1260.92	1873.6		0.048967
CTTGAGGCCCTTCTTACCCAGAAGCAGAAGGTGGGAGAACTGAAGGATGACGACTTTGAGAA	LEALLTQKQKVGELKDDDFE	210	1419	7550		75.8252	1246.86	2736.1		0.060813
CTTGAGGCCTTTCTTCCCCAGAAGCAGAAGGTGGGAGAACTGAAGGATGACGACTTTGAGAA	LEAFLPQKQKVGELKDDDFE	16	1325	756		5.77716	1164.26	273.973		0.00496208
CTTGAGGCCTTTCTTACTGAAGGATGACGACTTTGAGAAGATCAGTGAGAGATCGGAAGAGC	LEAFLTEG*RL*EDQ*EIGR	664	1322	0		239.752	1161.63	0		0.206394
CTTGAGGATGACGACTTTGAGAAGATCAGTGAGAGATCGGAAGAGCACACGTCTGAACTCCA	LEDDDFEKISERSEEHTSEL	273	1305	0		98.5728	1146.69	0		0.0859631
CTTGAGGCCTTTCTTACCCAGAAGCAGAAAAGGTGGGAGAACTGAAGGATGACGACTTTGAG	LEAFLTQKQKRWEN*RMTTL	3281	1296	0		1184.68	1138.78	0		1.04031
CTTGAGGCCTTTCTTACCCAGAAGAGAACTGAAGGATGACGACTTTGAGAAGATCAGTGAGA	LEAFLTQKRTEG*RL*EDQ*	326	1289	0		117.71	1132.63	0		0.103926
CTTGAGGCCTTTCTTACCCAGAAGCAGAACTGAAGGTGGGAGAACTGAAGGATGACGACTTT	LEAFLTQKQN*RWEN*RMTT	3871	1285	0		1397.71	1129.11	0		1.23788
CTTGAGGCCTTTCTTACCCAGAAGCAGACTTTGAGAAGATCAGTGAGAGATCGGAAGAGCAC	LEAFLTQKQTLRRSVRDRKS	130	1284	0		46.9394	1128.24	0		0.0416043
CTTGAGAACTGAAGGATGACGACTTTGAGAAGATCAGTGAGAGATCGGAAGAGCACACGTCT	LEN*RMTTLRRSVRDRKSTR	317	1270	0		114.46	1115.93	0		0.102569
CTTGAGGCCTTCCTTACCCAGAAGCAGAAGGTGGGAGAACTGAAGGATGACGACTTTGAGAA	LEAFLTQKQKVGELKDDDFE	195	1268	5381		70.4092	1114.18	1950.06		0.0631939
CTTGAGGCCTTTCTTACCCAGAAGCAGCAGGTGGGAGAACTGAAGGATGACGACTTTGAGAA	LEAFLTQKQQVGELKDDDFE	169	1235	3124		61.0213	1085.18	1132.13		0.0562315
CTTGAGGCCTTTCTTACCCAGAAGCAGAGGAGAACTGAAGGATGACGACTTTGAGAAGATCA	LEAFLTQKQRRTEG*RL*ED	812	1172	0		293.191	1029.82	0		0.2847
CTTGAGGCCTTTCTTACCCAGAAGCAGAAGGTGGGAGAACTGAAGGATGGCGACTTTGAGAA	LEAFLTQKQKVGELKDGDFE	201	1140	5808		72.5756	1001.7	2104.8		0.0724521
CTTGAGGCCTTTCTTACCCAGAAGCAGAAGGCGGGAGAACTGAAGGATGACGACTTTGAGAA	LEAFLTQKQKAGELKDDDFE	185	1119	4783		66.7984	983.252	1733.35		0.0679362
CTTGAGGCCTTTCTTACCCAGAAGGAGAACTGAAGGATGACGACTTTGAGAAGATCAGTGAG	LEAFLTQKEN*RMTTLRRSV	2345	1115	0		846.715	979.737	0		0.864227
CTTGAGGCCTTTCTTACCCAGAAGCAGGAGAACTGAAGGATGACGACTTTGAGAAGATCAGT	LEAFLTQKQEN*RMTTLRRS	870	1101	0		314.133	967.436	0		0.324707
CTTGAGGCCTTTCTTACCCAGAAGCAGGAGGGAGAACTGAAGGATGACGACTTTGAGAAGAT	LEAFLTQKQEGELKDDDFEK	2569	1082	1		927.596	950.741	0.362397		0.975656
CTTGAGGCCTTTCTTACCCAGAAGCAGAAGGTGGGAGAACTGAGGGATGACGACTTTGAGAA	LEAFLTQKQKVGELRDDDFE	176	1065	5701		63.5488	935.803	2066.03		0.0679083
CTTGAGGCCTTTCTTACCCAGAAGCAGAAGGTGGGAGGACTGAAGGATGACGACTTTGAGAA	LEAFLTQKQKVGGLKDDDFE	164	1064	5718		59.2159	934.924	2072.19		0.0633376
CTTGAGGCCTTTCTTACCAAGAAGCAGAAGGTGGGAGAACTGAAGGATGACGACTTTGAGAA	LEAFLTKKQKVGELKDDDFE	36	1062	1857		12.9986	933.167	672.972		0.0139296
CTTGAGGCCTTTCTTACCCAGAAGCGGAAGGTGGGAGAACTGAAGGATGACGACTTTGAGAA	LEAFLTQKRKVGELKDDDFE	142	1056	5272		51.2723	927.895	1910.56		0.0552566
CTTGAGGCCTTTCTTACCCAGAGGTGGGAGAACTGAAGGATGACGACTTTGAGAAGATCAGT	LEAFLTQRWEN*RMTTLRRS	3423	1051	0		1235.95	923.501	0		1.33833
CTTGAGGGAGAACTGAAGGATGACGACTTTGAGAAGATCAGTGAGAGATCGGAAGAGCACAC	LEGELKDDDFEKISERSEEH	146	1045	0		52.7166	918.229	0		0.0574112
CTTGAGGCCTTTCTTACCCAGAAGCAGAAGGTGGGGGAACTGAAGGATGACGACTTTGAGAA	LEAFLTQKQKVGELKDDDFE	181	1034	5657		65.3541	908.564	2050.08		0.0719313
CTTGGGGCCTTTCTTACCCAGAAGCAGAAGGTGGGAGAACTGAAGGATGACGACTTTGAGAA	LGAFLTQKQKVGELKDDDFE	161	1009	5966		58.1327	886.596	2162.06		0.0655684
CTTGAGGCCTTTCTTACCCAGAAGCAGAAGGTGGGAGAACTGAAGGACGACGACTTTGAGAA	LEAFLTQKQKVGELKDDDFE	159	1003	4974		57.4105	881.324	1802.57		0.0651412
CTTGAGGCCTCTCTTACCCAGAAGCAGAAGGTGGGAGAACTGAAGGATGACGACTTTGAGAA	LEASLTQKQKVGELKDDDFE	122	968	4999		44.0509	850.57	1811.63		0.0517898
CTTGAGGCCTTTCTTACCCAGAAGAAAGGTGGGAGAACTGAAGGATGACGACTTTGAGAAGA	LEAFLTQKKGGRTEG*RL*E	240	954	0		86.6574	838.269	0		0.103377
CTTGAGGCCTTTCTTACCCAGAAGCTGAAGGATGACGACTTTGAGAAGATCAGTGAGAGATC	LEAFLTQKLKDDDFEKISER	546883	944	6		197464	829.482	2.17438	250	238.058	del_58_QKVGE
CTCGAGGCCTTTCTTACCCAGAAGCAGAAGGTGGGAGAACTGAAGGATGACGACTTTGAGAA	LEAFLTQKQKVGELKDDDFE	152	940	4522		54.883	825.967	1638.76		0.066447
CTTGAGGCCTTTCTTACCCAGGAGAACTGAAGGATGACGACTTTGAGAAGATCAGTGAGAGA	LEAFLTQEN*RMTTLRRSVR	673	935	0		243.002	821.574	0		0.295776
CCTGAGGCCTTTCTTACCCAGAAGCAGAAGGTGGGAGAACTGAAGGATGACGACTTTGAGAA	PEAFLTQKQKVGELKDDDFE	120	932	4500		43.3287	818.937	1630.79		0.0529085
CTTGAGGCCTTTCTTAGAACTGAAGGATGACGACTTTGAGAAGATCAGTGAGAGATCGGAAG	LEAFLRTEG*RL*EDQ*EIG	2952	917	0		1065.89	805.757	0		1.32284
CTTGAGGCCTTTCAGGTGGGAGAACTGAAGGATGACGACTTTGAGAAGATCAGTGAGAGATC	LEAFQVGELKDDDFEKISER	146	912	0		52.7166	801.364	0		0.0657836
CTTGAGGCCTTTCTTACCCAGAAGCAGAAGGTGGGAGAACCGAAGGATGACGACTTTGAGAA	LEAFLTQKQKVGEPKDDDFE	143	909	4911		51.6334	798.728	1779.73		0.0646445
CTTGAGGCCTTTCTTACCCAGAAGAAGAAGGTGGGAGAACTGAAGGATGACGACTTTGAGAA	LEAFLTQKKKVGELKDDDFE	83	907	1548		29.969	796.97	560.991		0.0376037
CTTGAGGCCTTTCTTACCCAGAAGCAGAGAAGGATGACGACTTTGAGAAGATCAGTGAGAGA	LEAFLTQKQRRMTTLRRSVR	205	906	0		74.0199	796.092	0		0.0929791
CTTGAGGCCTTTCTTACCCAGAAGCAGAAGGTGGGAGAACTGGAGGATGACGACTTTGAGAA	LEAFLTQKQKVGELEDDDFE	159	901	3498		57.4105	791.698	1267.67		0.0725157
CTTGAGGCCTTTCCTACCCAGAAGCAGAAGGTGGGAGAACTGAAGGATGACGACTTTGAGAA	LEAFPTQKQKVGELKDDDFE	141	882	4845		50.9112	775.003	1755.82		0.0656917
CTTGAGGCCTTTCTTACCCAACTGAAGGATGACGACTTTGAGAAGATCAGTGAGAGATCGGA	LEAFLTQLKDDDFEKISERS	57	878	0		20.5811	771.488	0		0.0266772
CTTGAGGCCTTTCTTACCCAGAAGCAGAAGGTGGGAGAGCTGAAGGATGACGACTTTGAGAA	LEAFLTQKQKVGELKDDDFE	195	861	4826		70.4092	756.551	1748.93		0.093066
CTTGAGGCCTTTCTTACCCAGAAGCAGAAAGGGGGGAGAACTGAAGGATGACGACTTTGAGA	LEAFLTQKQKGGRTEG*RL*	2356	851	0		850.687	747.764	0		1.13764
CTTGAGGCCTTTCTTACCCAGAAGCAGAAAGGCGGGAGAACTGAAGGATGACGACTTTGAGA	LEAFLTQKQKGGRTEG*RL*	901	844	0		325.326	741.613	0		0.438674
CTTGAGGCCTTTCTTACCCAGAAGCAGAGGGAGAACTGAAGGATGACGACTTTGAGAAGATC	LEAFLTQKQREN*RMTTLRR	1336	835	0		482.393	733.705	0		0.657476
CTTGAGGCCTTTCTTACCCAGAAGCAGAAGGTGGGAGAACTGAAGGATGACGCCTTTGAGAA	LEAFLTQKQKVGELKDDAFE	28	834	1437		10.11	732.826	520.765		0.013796
CTTGAGGCCTTTCTTACCCAGGAGCAGAAGGTGGGAGAACTGAAGGATGACGACTTTGAGAA	LEAFLTQEQKVGELKDDDFE	131	817	5238		47.3005	717.888	1898.24		0.0658884
CTTGAGGCCTTTCTTACCCAGAAGCAGAAGGTGGGAGAACTGAAGGATGACGAATTTGAGAA	LEAFLTQKQKVGELKDDEFE	305	816	4792		110.127	717.01	1736.61		0.153592
CTTGAGGCCTTTCTTACCCAGAAGCAGAAGGTGGGAGAACTGAAGGGTGACGACTTTGAGAA	LEAFLTQKQKVGELKGDDFE	155	814	4548		55.9663	715.252	1648.18		0.0782469
CTTGAGGCCTTTCTTACCCAGAAGCAGTAAGGTGGGAGAACTGAAGGATGACGACTTTGAGA	LEAFLTQKQ*GGRTEG*RL*	270	790	0		97.4896	694.164	0		0.140442
CTTGAGGCCTTTCTTACCCAGAAGCAGAAGGTGGGAGAACTGAAGGATGACGACTTGAGAAG	LEAFLTQKQKVGELKDDDLR	186	786	4020		67.1595	690.649	1456.84		0.0972412
CTTGAGGCCTTTCTTACCCAGAAGCAGAGGATGACGACTTTGAGAAGATCAGTGAGAGATCG	LEAFLTQKQRMTTLRRSVRD	87	775	0		31.4133	680.983	0		0.0461293
CTTGAGGCCTTTCTTACCCAGAAGCAGGGAGAACTGAAGGATGACGACTTTGAGAAGATCAG	LEAFLTQKQGELKDDDFEKI	2359	766	1		851.77	673.075	0.362397		1.26549
CTTGAGGCCTTTCTTACCCGGAAGCAGAAGGTGGGAGAACTGAAGGATGACGACTTTGAGAA	LEAFLTRKQKVGELKDDDFE	85	759	3978		30.6912	666.924	1441.62		0.046019
CTTGAGGCCTTTCTTACCCAGAAGCAGAAACTGAAGGATGACGACTTTGAGAAGATCAGTGA	LEAFLTQKQKLKDDDFEKIS	4414	759	0		1593.77	666.924	0		2.38974
CTTGAGGCCTTTCTTACCCAGAAGCAGACGACTTTGAGAAGATCAGTGAGAGATCGGAAGAG	LEAFLTQKQTTLRRSVRDRK	1248	740	0		450.619	650.229	0		0.693015
CTTGAGGAGAACTGAAGGATGACGACTTTGAGAAGATCAGTGAGAGATCGGAAGAGCACACG	LEEN*RMTTLRRSVRDRKST	152	712	0		54.883	625.626	0		0.087725
CTTGAGGCCTTTCTTACCCAGAAGCAGAGAACTGAAGGTGGGAGAACTGAAGGATGACGACT	LEAFLTQKQRTEGGRTEG*R	83	709	0		29.969	622.99	0		0.0481051
CTTGAGGCCTTTCTTAACTGAAGGATGACGACTTTGAGAAGATCAGTGAGAGATCGGAAGAG	LEAFLN*RMTTLRRSVRDRK	222	703	0		80.1581	617.718	0		0.129765
CTTGAGGCCTTTCTTACCCAGAAGCAGAAGGGGGGAGAACTGAAGGATGACGACTTTGAGAA	LEAFLTQKQKGGELKDDDFE	214	698	1211		77.2695	613.324	438.863		0.125985
CTTGAGGCCTTTCTTACCCAGAAGCAGATGGTGGGAGAACTGAAGGATGACGACTTTGAGAA	LEAFLTQKQMVGELKDDDFE	40	689	941		14.4429	605.416	341.016		0.0238562
CTTGAGGCCTTTCTTACCCAGGATGACGACTTTGAGAAGATCAGTGAGAGATCGGAAGAGCA	LEAFLTQDDDFEKISERSEE	189	689	0		68.2427	605.416	0		0.11272
CTTGAGGCCTTTCTTACCCAGAAGCAGAGAAGGTGGGAGAACTGAAGGATGACGACTTTGAG	LEAFLTQKQRRWEN*RMTTL	172	687	0		62.1045	603.659	0		0.10288
CTTGAGGCCTTTCTTAAGGATGACGACTTTGAGAAGATCAGTGAGAGATCGGAAGAGCACAC	LEAFLKDDDFEKISERSEEH	60	685	0		21.6644	601.901	0		0.0359932
CTTGAGGCCTTTCTTACCCAGAAGCAGAACTGAACTGAAGGATGACGACTTTGAGAAGATCA	LEAFLTQKQN*TEG*RL*ED	80	670	0		28.8858	588.721	0		0.0490653
CTTGAGGCCTTTCTTACCCAGAAGCAGAAGAAGGTGGGAGAACTGAAGGATGACGACTTTGA	LEAFLTQKQKKVGELKDDDF	210	659	0		75.8252	579.056	0		0.130946
CTTGAGGCCTTTCTTACCCAGTGGGAGAACTGAAGGATGACGACTTTGAGAAGATCAGTGAG	LEAFLTQWEN*RMTTLRRSV	111	613	0		40.0791	538.636	0		0.0744084
CTTGAGGCCTTTCTCACCCAGAAGCAGAAGGTGGGAGAACTGAAGGATGACGACTTTGAGAA	LEAFLTQKQKVGELKDDDFE	101	605	2985		36.4683	531.606	1081.76		0.0686003
CTTGAGGCCTTTCTTACAGGTGGGAGAACTGAAGGATGACGACTTTGAGAAGATCAGTGAGA	LEAFLTGGRTEG*RL*EDQ*	99	605	0		35.7462	531.606	0		0.0672418
CTTGAGGCCTTTCTTACCCAGAAGCAGAAGGTGGGAGAACTGAAGGATGACAACTTTGAGAA	LEAFLTQKQKVGELKDDNFE	83	601	2872		29.969	528.092	1040.81		0.0567497
CTTGAGGCCTTTCTTACCCAGATGACGACTTTGAGAAGATCAGTGAGAGATCGGAAGAGCAC	LEAFLTQMTTLRRSVRDRKS	1539	598	0		555.691	525.456	0		1.05754
CTTGAGGCCTTTCTTACCCAGCAGCAGAAGGTGGGAGAACTGAAGGATGACGACTTTGAGAA	LEAFLTQQQKVGELKDDDFE	218	596	4061		78.7138	523.698	1471.7		0.150304
CTTGAGGCCTTTCTTGCCCAGAAGCAGAAGGTGGGAGAACTGAAGGATGACGACTTTGAGAA	LEAFLAQKQKVGELKDDDFE	117	596	3663		42.2455	523.698	1327.46		0.0806676
CTTGAGGCCTTTCTTACCCAGAAGCAGACGGTGGGAGAACTGAAGGATGACGACTTTGAGAA	LEAFLTQKQTVGELKDDDFE	114	595	2432		41.1623	522.82	881.351		0.0787313
CTTGAGGCCTTTCTTACCCAGAAGGGAGAACTGAAGGATGACGACTTTGAGAAGATCAGTGA	LEAFLTQKGELKDDDFEKIS	5671	587	0		2047.64	515.79	0		3.96992
CTTGAACTGAAGGATGACGACTTTGAGAAGATCAGTGAGAGATCGGAAGAGCACACGTCTGA	LELKDDDFEKISERSEEHTS	152	585	0		54.883	514.033	0		0.10677
CTTGAGGCCTTTCTTAACCAGAAGCAGAAGGTGGGAGAACTGAAGGATGACGACTTTGAGAA	LEAFLNQKQKVGELKDDDFE	10	584	2619		3.61073	513.154	949.119		0.00703634
CTTGAGGCCTTTCTTAGGTGGGAGAACTGAAGGATGACGACTTTGAGAAGATCAGTGAGAGA	LEAFLRWEN*RMTTLRRSVR	100	582	0		36.1073	511.397	0		0.0706052
CTTGAGGCCTGAAGGATGACGACTTTGAGAAGATCAGTGAGAGATCGGAAGAGCACACGTCT	LEA*RMTTLRRSVRDRKSTR	2097	574	0		757.169	504.367	0		1.50123
CTTGAGGCCTTTCTTACCCAGAAGCAGAAAGTGGGAGAACTGAAGGATGACGACTTTGAGAA	LEAFLTQKQKVGELKDDDFE	157	570	1583		56.6884	500.852	573.675		0.113184
CTTGAGGCCTTTCTTACCAGAAGGTGGGAGAACTGAAGGATGACGACTTTGAGAAGATCAGT	LEAFLTRRWEN*RMTTLRRS	120	568	0		43.3287	499.095	0		0.0868146
CTTGAGGCCTTTCTTACCCAGAAGCAGAAGGTGAGAGAACTGAAGGATGACGACTTTGAGAA	LEAFLTQKQKVRELKDDDFE	41	555	2134		14.804	487.672	773.356		0.0303564
CTTGAAGGATGACGACTTTGAGAAGATCAGTGAGAGATCGGAAGAGCACACGTCTGAACTCC	LEG*RL*EDQ*EIGRAHV*T	3788	552	0		1367.74	485.036	0		2.81988
CTTGAGGCCTTTCTTACCAGAACTGAAGGATGACGACTTTGAGAAGATCAGTGAGAGATCGG	LEAFLTRTEG*RL*EDQ*EI	188	552	0		67.8817	485.036	0		0.139952
CTTGAGGCCTTTCTTACCCAGAAGAAGGATGACGACTTTGAGAAGATCAGTGAGAGATCGGA	LEAFLTQKKDDDFEKISERS	60	552	0		21.6644	485.036	0		0.0446655
CTTGAGGGTGGGAGAACTGAAGGATGACGACTTTGAGAAGATCAGTGAGAGATCGGAAGAGC	LEGGRTEG*RL*EDQ*EIGR	13	549	0		4.69394	482.4	0		0.0097304
CTTGAGGCCTTTCTTACCCAGAAACAGAAGGTGGGAGAACTGAAGGATGACGACTTTGAGAA	LEAFLTQKQKVGELKDDDFE	144	539	1758		51.9945	473.613	637.095		0.109783
CTTGAGGCCTTTCTTACCCAGAAGCAGAACTGGTGGGAGAACTGAAGGATGACGACTTTGAG	LEAFLTQKQNWWEN*RMTTL	85	538	0		30.6912	472.734	0		0.0649227
CTTGTGGCCTTTCTTACCCAGAAGCAGAAGGTGGGAGAACTGAAGGATGACGACTTTGAGAA	LVAFLTQKQKVGELKDDDFE	41	522	2026		14.804	458.675	734.217		0.0322755
CTTGAGGCCTTTCTTACCCAGAAGCAGAACTGGGAGAACTGAAGGATGACGACTTTGAGAAG	LEAFLTQKQNWEN*RMTTLR	84	506	0		30.3301	444.616	0		0.0682164
CTTGAGGCCTTTCTTACCCAAGGTGGGAGAACTGAAGGATGACGACTTTGAGAAGATCAGTG	LEAFLTQGGRTEG*RL*EDQ	7972	503	0		2878.47	441.98	0		6.51267
CTTGAGGCCTTTCTTACCCAGAAGTAGAAGGTGGGAGAACTGAAGGATGACGACTTTGAGAA	LEAFLTQK*KVGELKDDDFE	129	500	3016		46.5784	439.344	1092.99		0.106018
CTTGAGGCCTTTCTTACCAGAAGCAGGTGGGAGAACTGAAGGATGACGACTTTGAGAAGATC	LEAFLTRSRWEN*RMTTLRR	331	500	0		119.515	439.344	0		0.272031
CTTGAGGTCTTTCTTACCCAGAAGCAGAAGGTGGGAGAACTGAAGGATGACGACTTTGAGAA	LEVFLTQKQKVGELKDDDFE	98	498	2034		35.3851	437.587	737.116		0.0808642
CTTGAGGCCTTTCTTACCCAGAAGCAGGTGGAGAACTGAAGGATGACGACTTTGAGAAGATC	LEAFLTQKQVEN*RMTTLRR	292	497	0		105.433	436.708	0		0.241427
CTTGAGGCCTTTCTTACCCAGAAGCAGAAGGTGGGAGAACTGAAGGATAACGACTTTGAGAA	LEAFLTQKQKVGELKDNDFE	46	486	2322		16.6093	427.043	841.487		0.0388939
CTTGAGGCCTTTCTTAAGGTGGGAGAACTGAAGGATGACGACTTTGAGAAGATCAGTGAGAG	LEAFLKVGELKDDDFEKISE	2132	486	0		769.807	427.043	0		1.80265
CTTGAGGCCTTTCTTACCCAGAAGCAGAAAGGTGGGAGAACTGAAGGATGACGACTTTGAAA	LEAFLTQKQKGGRTEG*RL*	1450	484	0		523.555	425.285	0		1.23107
CTTGAGGCCTTTCTTACCCAGAAGCAGAAGGTGGGAGAACTGAAGGATGACGACTTTGAGCA	LEAFLTQKQKVGELKDDDFE	29	477	2995		10.4711	419.134	1085.38		0.0249827
CTTGAGGCCTTTCTTACCCAGAAGCAGAAGGTGGGAGAACTGAAGGATGACGATTTTGAGAA	LEAFLTQKQKVGELKDDDFE	67	469	2431		24.1919	412.105	880.988		0.0587032
CTTGAGGCCTTTCTTACCCAGAAGCAGACAGAAGGTGGGAGAACTGAAGGATGACGACTTTG	LEAFLTQKQTEGGRTEG*RL	769	454	0		277.665	398.924	0		0.696034
CTTGAGGCCTTGAAGGATGACGACTTTGAGAAGATCAGTGAGAGATCGGAAGAGCACACGTC	LEALKDDDFEKISERSEEHT	498	452	0		179.814	397.167	0		0.452742
CTTGAGGCCTTGAGGTGGGAGAACTGAAGGATGACGACTTTGAGAAGATCAGTGAGAGATCG	LEALRWEN*RMTTLRRSVRD	21	450	0		7.58252	395.41	0		0.0191764
CTTGAGGCCTTTCTTACCCAGAAGCAGAACCCAGGTGGGAGAACTGAAGGATGACGACTTTG	LEAFLTQKQNPGGRTEG*RL	52	442	0		18.7758	388.38	0		0.0483438
CTTGAGGCCTTTCTTACCGAACTGAAGGATGACGACTTTGAGAAGATCAGTGAGAGATCGGA	LEAFLTELKDDDFEKISERS	100	440	0		36.1073	386.623	0		0.0933914
CTTGAGGCCTTTCTTACCCAGAAGCTTCTGGGTGGGAGAACTGAAGGATGACGACTTTGAGA	LEAFLTQKLLGGRTEG*RL*	102	438	0		36.8294	384.865	0		0.0956942
CTTGAGGCCTTTCTTACCCAGAAGCAGGTGGGAGAACTGAAGGATGACGACTTTGAGAGATC	LEAFLTQKQVGELKDDDFER	1224	435	0		441.953	382.229	0		1.15625
CTTGAGGCCTTTCTTGGGAGAACTGAAGGATGACGACTTTGAGAAGATCAGTGAGAGATCGG	LEAFLGRTEG*RL*EDQ*EI	135	432	0		48.7448	379.593	0		0.128413
CTTGAGGCCTTTCTTACCCAGAAGCAGGTGGGTGAACTGAAGGATGACGACTTTGAGAAGAT	LEAFLTQKQVGELKDDDFEK	362	431	0		130.708	378.715	0		0.345137
CTTGAGGCCTTGGGAGAACTGAAGGATGACGACTTTGAGAAGATCAGTGAGAGATCGGAAGA	LEALGELKDDDFEKISERSE	4271	421	0		1542.14	369.928	0		4.16876
CTTGAGGCCTTTCTTACCCAGAAGCAGAAGGTGGGAGAACTGAAGGATGACGACTTTGAAAA	LEAFLTQKQKVGELKDDDFE	55	417	2409		19.859	366.413	873.016		0.0541984
CTTGAGGCCTTTCTTACCCAGAAGCAGAAGGTGGGAGAACTGAAGGATGCCGACTTTGAGAA	LEAFLTQKQKVGELKDADFE	28	416	1075		10.11	365.534	389.577		0.0276582
CTTGAGGCCTTTCTTACCCAGAAGCAGAAGGTAGGAGAACTGAAGGATGACGACTTTGAGAA	LEAFLTQKQKVGELKDDDFE	52	414	2202		18.7758	363.777	797.999		0.0516134
CTTGAGGCCTTTCTTACCCAGAAGCAGAAGGTGGGAGAACTGAAGGATGACGACTTTGGAAG	LEAFLTQKQKVGELKDDDFG	59	414	1912		21.3033	363.777	692.904		0.0585614
CTTGAGGCCTTTCTTACCCAGAAGCAGAAAGGATGACGACTTTGAGAAGATCAGTGAGAGAT	LEAFLTQKQKG*RL*EDQ*E	70	414	0		25.2751	363.777	0		0.0694796
CTTGAGGCCTTTCTTACCCAGAAGCTGGGAGAACTGAAGGATGACGACTTTGAGAAGATCAG	LEAFLTQKLGELKDDDFEKI	3112	413	0		1123.66	362.898	0		3.09634
CTTGAGGCCTTTCTTACCCAGAAGCAGGAAGGTGGGAGAACTGAAGGATGACGACTTTGAGA	LEAFLTQKQEGGRTEG*RL*	767	407	0		276.943	357.626	0		0.774392
CTTGAGGCCTTTCTACTGAAGGATGACGACTTTGAGAAGATCAGTGAGAGATCGGAAGAGCA	LEAFLLKDDDFEKISERSEE	0	405	0		0	355.869	0		0
CTTGAGGCCTTTCTTACCCAGAAGCAGAACTGAAGGAGAACTGAAGGATGACGACTTTGAGA	LEAFLTQKQN*RRTEG*RL*	89	403	0		32.1355	354.111	0		0.0907496
CTTGAGGCCTTAGGTGGGAGAACTGAAGGATGACGACTTTGAGAAGATCAGTGAGAGATCGG	LEALGGRTEG*RL*EDQ*EI	60	395	0		21.6644	347.082	0		0.0624186
CTTGAGGCCTTTCTAGAACTGAAGGATGACGACTTTGAGAAGATCAGTGAGAGATCGGAAGA	LEAFLELKDDDFEKISERSE	16	394	0		5.77716	346.203	0		0.0166872
CTTGAGGCCTTTCTTACCCAGAAGCAGAAGTTGGGAGAACTGAAGGATGACGACTTTGAGAA	LEAFLTQKQKLGELKDDDFE	9	393	442		3.24965	345.324	160.18		0.00941043
CTTGAGGCCTTTCTTACCCAGAAGCAGAGAACTGAAGGATGGGAGAACTGAAGGATGACGAC	LEAFLTQKQRTEGWEN*RMT	81	393	0		29.2469	345.324	0		0.0846939
CTTGAGGCCTTTCTTACCCAGAAGCAGGTGGGAGAACTGAAGGATGACGACTTTGAGAAATC	LEAFLTQKQVGELKDDDFEK	1176	392	0		424.621	344.446	0		1.23277
CTTGAGGCCTTTCTTACCTGAAGGATGACGACTTTGAGAAGATCAGTGAGAGATCGGAAGAG	LEAFLT*RMTTLRRSVRDRK	136	392	0		49.1059	344.446	0		0.142565
CTTGAGGCCTTTCTTACCCAGAAGCAGAAGATGGGAGAACTGAAGGATGACGACTTTGAGAA	LEAFLTQKQKMGELKDDDFE	62	390	1576		22.3865	342.688	571.138		0.0653261
CTTGAGGAACTGAAGGATGACGACTTTGAGAAGATCAGTGAGAGATCGGAAGAGCACACGTC	LEELKDDDFEKISERSEEHT	39	386	0		14.0818	339.174	0		0.0415181
CTTGAGGCTTTTCTTACCCAGAAGCAGAAGGTGGGAGAACTGAAGGATGACGACTTTGAGAA	LEAFLTQKQKVGELKDDDFE	51	385	1778		18.4147	338.295	644.343		0.0544339
CTTGAGGCCTTTCTTACCCAGAAGCAGAAGGTGGGAGAACTGAAGGATGATGACTTTGAGAA	LEAFLTQKQKVGELKDDDFE	70	383	2219		25.2751	336.538	804.16		0.0751033
CTTGAGGCCTTTCTTACCCAGAAGCAAAAGGTGGGAGAACTGAAGGATGACGACTTTGAGAA	LEAFLTQKQKVGELKDDDFE	33	383	1298		11.9154	336.538	470.392		0.0354058
CTTGAGGCCTTTCTTACTCAGAAGCAGAAGGTGGGAGAACTGAAGGATGACGACTTTGAGAA	LEAFLTQKQKVGELKDDDFE	76	382	2134		27.4415	335.659	773.356		0.0817542
TTTGAGGCCTTTCTTACCCAGAAGCAGAAGGTGGGAGAACTGAAGGATGACGACTTTGAGAA	FEAFLTQKQKVGELKDDDFE	51	382	1622		18.4147	335.659	587.809		0.0548614
CTTGAGGAAGGATGACGACTTTGAGAAGATCAGTGAGAGATCGGAAGAGCACACGTCTGAAC	LEEG*RL*EDQ*EIGRAHV*	40	380	0		14.4429	333.902	0		0.043255
CTTGAGGCCTTTCTTACCCAGAAGCAGAAGGTGGGAGAACTGAAGAATGACGACTTTGAGAA	LEAFLTQKQKVGELKNDDFE	104	379	1910		37.5516	333.023	692.179		0.11276
CTTGAGGCCTTTCTTACCCAGAAGCAGAAGGTGGAAGAACTGAAGGATGACGACTTTGAGAA	LEAFLTQKQKVEELKDDDFE	89	374	1495		32.1355	328.629	541.784		0.0977863
CTTGAGGCCTTTACTGAAGGATGACGACTTTGAGAAGATCAGTGAGAGATCGGAAGAGCACA	LEAFTEG*RL*EDQ*EIGRA	46	370	0		16.6093	325.115	0		0.0510876
CTTGAGGCCTTTCTTACCAGGTGGGAGAACTGAAGGATGACGACTTTGAGAAGATCAGTGAG	LEAFLTRWEN*RMTTLRRSV	119	367	0		42.9676	322.479	0		0.133242
CTTGAGGCCTTTCTTACCCAGAAGCAGAAGGTGGGAGAAATGAAGGATGACGACTTTGAGAA	LEAFLTQKQKVGEMKDDDFE	62	366	1146		22.3865	321.6	415.308		0.0696098
CTTGAGGCCTTTCTTACCCAGAAGCAGAAGGTGGGAGAACTGCAGGATGACGACTTTGAGAA	LEAFLTQKQKVGELQDDDFE	49	361	1361		17.6926	317.206	493.223		0.0557762
CTTGAGGCCTTTCTTCCCCAGAAGCAGAAAGGTGGGAGAACTGAAGGATGACGACTTTGAGA	LEAFLPQKQKGGRTEG*RL*	113	361	0		40.8012	317.206	0		0.128627
CTTGAGGCCTTACTGAAGGATGACGACTTTGAGAAGATCAGTGAGAGATCGGAAGAGCACAC	LEALLKDDDFEKISERSEEH	7	359	0		2.52751	315.449	0		0.00801241
CTTGAGGCCTTTCTTACCCAGAAGCAGAAAGGTGGGAGAACTAAAGGATGACGACTTTGAGA	LEAFLTQKQKGGRTKG*RL*	1762	358	0		636.21	314.57	0		2.02247
CTTGAGGCCTTTCTTACCCAGAAGCAGAAGGTGGGAGCACTGAAGGATGACGACTTTGAGAA	LEAFLTQKQKVGALKDDDFE	34	356	2060		12.2765	312.813	746.539		0.0392454
CTTGAGGCCTTTCTTACCCAGAAGCACAGGTGGGAGAACTGAAGGATGACGACTTTGAGAAG	LEAFLTQKHRWEN*RMTTLR	3	356	1		1.08322	312.813	0.362397		0.00346283
CTTGAGGCCTTTCTTACCCAGAAGCAGAACTGAAGGATGGGAGAACTGAAGGATGACGACTT	LEAFLTQKQN*RMGELKDDD	72	356	0		25.9972	312.813	0		0.0831079
CTTGAGGCCTTTCTTACCCAGAAGCAGGTGGGAGAACTAAAGGATGACGACTTTGAGAAGAT	LEAFLTQKQVGELKDDDFEK	1625	344	0		586.743	302.269	0		1.94113
CTTGAGGCCTTCCTTACCCAGAAGCAGAAAGGTGGGAGAACTGAAGGATGACGACTTTGAGA	LEAFLTQKQKGGRTEG*RL*	797	344	0		287.775	302.269	0		0.95205
CTTGAGGTCTTTCTTACCCAGAAGCAGGTGGGAGAACTGAAGGATGACGACTTTGAGAAGAT	LEVFLTQKQVGELKDDDFEK	401	344	0		144.79	302.269	0		0.479011
CTTGAGGCCTTTCTTAAACTGAAGGATGACGACTTTGAGAAGATCAGTGAGAGATCGGAAGA	LEAFLKLKDDDFEKISERSE	155	343	0		55.9663	301.39	0		0.185694
CTTGAGGCCTTTCTTACCCAGAAGCAACTGAAGGATGACGACTTTGAGAAGATCAGTGAGAG	LEAFLTQKQLKDDDFEKISE	1165	342	0		420.65	300.511	0		1.39978
CTTGAGGCCTTTCTTACCCAGAAGTTCTCCCAGGTGGGAGAACTGAAGGATGACGACTTTGA	LEAFLTQKFSQVGELKDDDF	0	342	0		0	300.511	0		0
CTTGAGGCCTTTCTTACCCAGAAGCAGAAGGGTGGGAGAACTGAAGGATGACGACTTTGAGA	LEAFLTQKQKGGRTEG*RL*	729	341	0		263.222	299.633	0		0.878482
CTTGAGGCCTTTCTTACCTAGAAGCAGAAGGTGGGAGAACTGAAGGATGACGACTTTGAGAA	LEAFLT*KQKVGELKDDDFE	59	340	1787		21.3033	298.754	647.604		0.0713071
CTTGAGGCCTTTCTTACCCAGAAGCAGTAGGTGGGAGAACTGAAGGATGACGACTTTGAGAA	LEAFLTQKQ*VGELKDDDFE	58	339	1400		20.9422	297.875	507.356		0.0703053
CTTGAGACCTTTCTTACCCAGAAGCAGAAGGTGGGAGAACTGAAGGATGACGACTTTGAGAA	LETFLTQKQKVGELKDDDFE	63	337	1903		22.7476	296.118	689.642		0.0768193
CTTGAGGCCTTTCTTACCCAGAAGCAGAAAGAAGGTGGGAGAACTGAAGGATGACGACTTTG	LEAFLTQKQKEGGRTEG*RL	417	336	0		150.567	295.239	0		0.509984
CTTGAGGCCTTTCTTACCCAGAAGCAGAAGGTGGGAGAACTGACGGATGACGACTTTGAGAA	LEAFLTQKQKVGELTDDDFE	104	334	2400		37.5516	293.482	869.754		0.127952
CTTGAGGCCTTTCTTCTGGGTAAGGTGGGAGAACTGAAGGATGACGACTTTGAGAAGATCAG	LEAFLLGKVGELKDDDFEKI	15	334	0		5.41609	293.482	0		0.0184546
CTTGAAGCCTTTCTTACCCAGAAGCAGAAGGTGGGAGAACTGAAGGATGACGACTTTGAGAA	LEAFLTQKQKVGELKDDDFE	42	331	1861		15.165	290.846	674.422		0.0521412
CTTGAGGCCTTTCTTACCCAGAAGCAGGTGGGAGAACTGAAGGATGACGACTTTGAAAGATC	LEAFLTQKQVGELKDDDFER	1074	328	0		387.792	288.21	0		1.34552
CTTGAGGCCTTTCTTACCCAGAAGCAGGTAGGAGAACTGAAGGATGACGACTTTGAGAAGAT	LEAFLTQKQVGELKDDDFEK	334	325	0		120.598	285.574	0		0.422302
CTTGAGGCCTTAGAACTGAAGGATGACGACTTTGAGAAGATCAGTGAGAGATCGGAAGAGCA	LEALELKDDDFEKISERSEE	29	324	0		10.4711	284.695	0		0.0367801
CTTGAGGCCTTTCTTACCCAGAAGCAGAAGCAGAAGGTGGGAGAACTGAAGGATGACGACTT	LEAFLTQKQKQKVGELKDDD	476	321	0		171.871	282.059	0		0.609343
CTTGAGGCCTTTCTTACCCAGCAGGTGGGAGAACTGAAGGATGACGACTTTGAGAAGATCAG	LEAFLTQQVGELKDDDFEKI	345	317	0		124.57	278.544	0		0.447218
CTTGGGAGAACTGAAGGATGACGACTTTGAGAAGATCAGTGAGAGATCGGAAGAGCACACGT	LGRTEG*RL*EDQ*EIGRAH	328	317	0		118.432	278.544	0		0.425181
CTTGAGGCCTTTCTTACCCAGAAGCAGAAGGTGGAGAACTGAAGGATGACGACTTTGAGAAG	LEAFLTQKQKVEN*RMTTLR	61	316	1621		22.0254	277.666	587.446		0.0793236
CTTGAGGCCTTTCTTACCCAGAAGCAGAAGGTGGGAAAACTGAAGGATGACGACTTTGAGAA	LEAFLTQKQKVGKLKDDDFE	49	316	1448		17.6926	277.666	524.752		0.063719
CTTGAGGCCTTTCTTACCCAGAAGCAGAAGGTGGGTGAACTGAAGGATGACGACTTTGAGAA	LEAFLTQKQKVGELKDDDFE	35	316	1127		12.6375	277.666	408.422		0.0455135
CTTGAGGCCTTTCTTACCCAGAAGCAGGAGAACTGAAGGTGGGAGAACTGAAGGATGACGAC	LEAFLTQKQEN*RWEN*RMT	9	315	0		3.24965	276.787	0		0.0117406
CTTGAGGCCCTTCTTACCCAGAAGCAGAAAGGTGGGAGAACTGAAGGATGACGACTTTGAGA	LEALLTQKQKGGRTEG*RL*	976	314	0		352.407	275.908	0		1.27726
CTTGAGGCCTTTCTTACCCAGAAGCAGAACTGAAGATGGGAGAACTGAAGGATGACGACTTT	LEAFLTQKQN*RWEN*RMTT	61	309	0		22.0254	271.515	0		0.0811206
CTTGAGGCCTTTCTTACCCAGAAGCAGAAGGTGGGAGAACTGAAGGATGACGACTTTAAGAA	LEAFLTQKQKVGELKDDDFK	96	308	1982		34.663	270.636	718.272		0.12808
CTTGAGGCCTTTCTTACCCAGAAGCAGAAGGTGGGAGAACTGAAGGATGACGACCTTGAGAA	LEAFLTQKQKVGELKDDDLE	71	308	1406		25.6362	270.636	509.531		0.0947256
CTTGAGGCCTTTCTTACGAAGGATGACGACTTTGAGAAGATCAGTGAGAGATCGGAAGAGCA	LEAFLTKDDDFEKISERSEE	14	305	1		5.05502	268	0.362397		0.018862
CTTGAGGCCTTTCTTACACAGAAGCAGAAGGTGGGAGAACTGAAGGATGACGACTTTGAGAA	LEAFLTQKQKVGELKDDDFE	20	304	4150		7.22145	267.121	1503.95		0.0270344
CTTGAGGCCTTTCTTACCCAGACGCAGAAGGTGGGAGAACTGAAGGATGACGACTTTGAGAA	LEAFLTQTQKVGELKDDDFE	463	302	2371		167.177	265.364	859.244		0.62999
CTTGAGGCCTTTCTTACCCAGAAGCAGAGGTCCCACCCCAGATCTTGTCTCTGGGCCTCCAG	LEAFLTQKQRSHPRSCLWAS	8	301	0		2.88858	264.485	0		0.0109215
CTTGAGGCCTTTCTTACCCAGAAGGAGGGAGAACTGAAGGATGACGACTTTGAGAAGATCAG	LEAFLTQKEGELKDDDFEKI	1334	295	0		481.671	259.213	0		1.8582
CTTGAGGCCTTTCTTACCCAGAAGCAGAAGGTGGGCGAACTGAAGGATGACGACTTTGAGAA	LEAFLTQKQKVGELKDDDFE	174	294	1810		62.8266	258.334	655.939		0.243199
CTTGAGGCCTTTCTTAGAGAACTGAAGGATGACGACTTTGAGAAGATCAGTGAGAGATCGGA	LEAFLRELKDDDFEKISERS	18	290	0		6.49931	254.82	0		0.0255055
CTTGAGGCCTTTCTTACCAGAAGCAGAAGGTGGGAGAACTGAAGGATGACGACTTTGAGAAG	LEAFLTRSRRWEN*RMTTLR	38	289	1513		13.7208	253.941	548.307		0.0540313
CTTGAGGCCTTTCTTACCGAGAACTGAAGGATGACGACTTTGAGAAGATCAGTGAGAGATCG	LEAFLTEN*RMTTLRRSVRD	1847	288	0		666.901	253.062	0		2.63532
CTTGAGGCCTTTCTTACCCAGAAGCAGAAGGAGAACTGAAGGATGACGACTTTGAGAAGATC	LEAFLTQKQKEN*RMTTLRR	41	287	0		14.804	252.184	0		0.0587032
CTTGAGGCCTTTCTTGAAGGATGACGACTTTGAGAAGATCAGTGAGAGATCGGAAGAGCACA	LEAFLEG*RL*EDQ*EIGRA	38	287	0		13.7208	252.184	0		0.0544078
CTTAAGGCCTTTCTTACCCAGAAGCAGAAGGTGGGAGAACTGAAGGATGACGACTTTGAGAA	LKAFLTQKQKVGELKDDDFE	42	285	1491		15.165	250.426	540.335		0.060557
CTTGAGGCCTTTCTTACCCAGAAGCAGAAAGGTGGGGGAACTGAAGGATGACGACTTTGAGA	LEAFLTQKQKGGGTEG*RL*	840	283	0		303.301	248.669	0		1.2197
CTTGATGACGACTTTGAGAAGATCAGTGAGAGATCGGAAGAGCACACGTCTGAACTCCAGTC	LDDDFEKISERSEEHTSELQ	78	283	0		28.1637	248.669	0		0.113258
CTTGAGGCCTTTCTTACCCAGAAGCAGGTGGGAGAACTGAAGGATGACGAATTTGAGAAGAT	LEAFLTQKQVGELKDDEFEK	1415	282	0		510.918	247.79	0		2.0619
CTTGAGGCCTTTCTTACCCAGAAGCAGGTGGGGGAACTGAAGGATGACGACTTTGAGAAGAT	LEAFLTQKQVGELKDDDFEK	1052	277	0		379.848	243.397	0		1.56061
CTTGAGGCCTTTCTTACCCAGAAGCAGAAAGGTGGGAGAACTGAGGGATGACGACTTTGAGA	LEAFLTQKQKGGRTEG*RL*	851	277	0		307.273	243.397	0		1.26244
CTTGAGGCCTTTCTTACCCCGAAGCAGAAGGTGGGAGAACTGAAGGATGACGACTTTGAGAA	LEAFLTPKQKVGELKDDDFE	64	275	8143		23.1086	241.639	2951		0.0956328
CTTGAGGCCTTTCTTACCCAGAAAGTGGGAGAACTGAAGGATGACGACTTTGAGAAGATCAG	LEAFLTQKVGELKDDDFEKI	884	275	0		319.188	241.639	0		1.32093
CTTGAGGCCTTCCTTACCCAGAAGCAGGTGGGAGAACTGAAGGATGACGACTTTGAGAAGAT	LEAFLTQKQVGELKDDDFEK	632	273	0		228.198	239.882	0		0.951293
CTTGAGGCCTTTCTTACCCAGAAGCAGGGTGGGAGAACTGAAGGATGACGACTTTGAGAAGA	LEAFLTQKQGGRTEG*RL*E	373	273	0		134.68	239.882	0		0.561443
CTTGAGGCCTTTCTTACCCAGAGGCAGGTGGGAGAACTGAAGGATGACGACTTTGAGAAGAT	LEAFLTQRQVGELKDDDFEK	779	272	0		281.276	239.003	0		1.17687
CTTGAGGCCTTTCTTACCCAGAAGACTGAAGGATGACGACTTTGAGAAGATCAGTGAGAGAT	LEAFLTQKTEG*RL*EDQ*E	47	272	0		16.9704	239.003	0		0.071005
CTTGAGGCCTTTCTTACCCAGAAGCTTCAGGTGGGAGAACTGAAGGATGACGACTTTGAGAA	LEAFLTQKLQVGELKDDDFE	0	272	0		0	239.003	0		0
CTTGAGGCCTTTCTTACCCAGAAGCAGAAGGTGGGAGAACTGAAAGATGACGACTTTGAGAA	LEAFLTQKQKVGELKDDDFE	46	270	1543		16.6093	237.246	559.179		0.070009
CTTGAGGCCTTTCTTACCCAGAAGCAGAAGCAGGTGGGAGAACTGAAGGATGACGACTTTGA	LEAFLTQKQKQVGELKDDDF	59	269	0		21.3033	236.367	0		0.0901279
CTTGAGGCCTTTCTTACCAAGGTGGGAGAACTGAAGGATGACGACTTTGAGAAGATCAGTGA	LEAFLTKVGELKDDDFEKIS	50	269	0		18.0536	236.367	0		0.0763796
CTTGAGGCCTTTCTTACCCAAGGATGACGACTTTGAGAAGATCAGTGAGAGATCGGAAGAGC	LEAFLTQG*RL*EDQ*EIGR	58	268	0		20.9422	235.488	0		0.0889309
CTTGAGGCCTTTCTTACCCAGAAGCAGAACTGAAGGGAGAACTGAAGGATGACGACTTTGAG	LEAFLTQKQN*REN*RMTTL	53	267	0		19.1368	234.61	0		0.0815688
CTTGAGGCCTTTAGGTGGGAGAACTGAAGGATGACGACTTTGAGAAGATCAGTGAGAGATCG	LEAFRWEN*RMTTLRRSVRD	16	267	0		5.77716	234.61	0		0.0246246
CTTGAGGCCTTTCTTACCCAGAAGCAGAAGTGGGAGAACTGAAGGATGACGACTTTGAGAAG	LEAFLTQKQKWEN*RMTTLR	220	265	10		79.436	232.852	3.62397		0.341143
CTTGAGGCCCTTCTTACCCAGAAGCAGGTGGGAGAACTGAAGGATGACGACTTTGAGAAGAT	LEALLTQKQVGELKDDDFEK	862	263	0		311.245	231.095	0		1.34683
CTTGAGGCCTTTCTTACCAAGAAGCAGAAAGGTGGGAGAACTGAAGGATGACGACTTTGAGA	LEAFLTKKQKGGRTEG*RL*	98	263	0		35.3851	231.095	0		0.153119
CTTGAGGCCTTTCTTACCAAGAAGCAGGTGGGAGAACTGAAGGATGACGACTTTGAGAAGAT	LEAFLTKKQVGELKDDDFEK	114	262	0		41.1623	230.216	0		0.178798
CTTGAGCCCTTTCTTACCCAGAAGCAGAAGGTGGGAGAACTGAAGGATGACGACTTTGAGAA	LEPFLTQKQKVGELKDDDFE	8	260	245		2.88858	228.459	88.7874		0.0126438
CTTGAGGCCTTTCTTACCCAGAAGCAAAGGTGGGAGAACTGAAGGATGACGACTTTGAGAAG	LEAFLTQKQRWEN*RMTTLR	121	259	8		43.6898	227.58	2.89918		0.191975
CTTGAGGCCTTTCTTACCCAGAAGCAGGTGGGAGAACTGAAGGATGACGACTTTGAGAAGAC	LEAFLTQKQVGELKDDDFEK	1131	258	0		408.373	226.702	0		1.80137
CTTGAGGCCTTTCTTACCCAGAAGCAGAAGGTGGGAGAATTGAAGGATGACGACTTTGAGAA	LEAFLTQKQKVGELKDDDFE	42	257	1452		15.165	225.823	526.201		0.0671546
CTTGAGGCCTTTCTTACCCAGAAGCAGGCGGGAGAACTGAAGGATGACGACTTTGAGAAGAT	LEAFLTQKQAGELKDDDFEK	716	257	0		258.528	225.823	0		1.14483
CTTGAGGCCTTTCTTACCCAGAAGCAAACTGAAGGATGACGACTTTGAGAAGATCAGTGAGA	LEAFLTQKQTEG*RL*EDQ*	7	257	0		2.52751	225.823	0		0.0111924
CTTGAGGCCTTTCTTACCCAGAAGCAGAAAGGTGGGAGAACTGAAGGATGACGACTTGAGAA	LEAFLTQKQKGGRTEG*RLE	920	255	0		332.187	224.066	0		1.48254
CTTGAGGCCTTTCTTACCCAGAAGCAGGTGGGAGAACTGAGGGATGACGACTTTGAGAAGAT	LEAFLTQKQVGELRDDDFEK	763	253	0		275.498	222.308	0		1.23926
CTTGAGGCCTTTCTTATCCAGAAGCAGAAGGTGGGAGAACTGAAGGATGACGACTTTGAGAA	LEAFLIQKQKVGELKDDDFE	55	251	1653		19.859	220.551	599.043		0.0900427
CTTGAGGCCTTTCTTACCCAGAAGCGGAAAGGTGGGAGAACTGAAGGATGACGACTTTGAGA	LEAFLTQKRKGGRTEG*RL*	954	251	0		344.463	220.551	0		1.56183
CTTGAGGCCTTTCTTACCCAGAAGCAGAAAGGTGGGAGAACTGAAGGACGACGACTTTGAGA	LEAFLTQKQKGGRTEGRRL*	648	251	0		233.975	220.551	0		1.06087
CTTGAGGCCTTTCTTACCCAGAAAACTGAAGGATGACGACTTTGAGAAGATCAGTGAGAGAT	LEAFLTQKTEG*RL*EDQ*E	10	251	0		3.61073	220.551	0		0.0163714
CTTGAGGCCTTTCTTACCCAGAAGCAGAATGACGACTTTGAGAAGATCAGTGAGAGATCGGA	LEAFLTQKQNDDFEKISERS	9	251	0		3.24965	220.551	0		0.0147343
CTTGAGGCCTTTCTTACCCAGAAGCAGTAAGAACTGAAGGATGACGACTTTGAGAAGATCAG	LEAFLTQKQ*ELKDDDFEKI	9	250	0		3.24965	219.672	0		0.0147932
CTTGAGGCCTTTCTTACCCAGAAGCAGAAGGTGGGAGAACTGTAGGATGACGACTTTGAGAA	LEAFLTQKQKVGEL*DDDFE	38	247	1149		13.7208	217.036	416.395		0.0632188
CTTGAGGCCTTTCTTACCCAGAAGCAGGTGGGAGAACTGAAGGACGACGACTTTGAGAAGAT	LEAFLTQKQVGELKDDDFEK	694	246	0		250.584	216.157	0		1.15927
CTTGAGGCCTTTCTTACCCAGAAGCAGAACTGAAGTGGGAGAACTGAAGGATGACGACTTTG	LEAFLTQKQN*SGRTEG*RL	2	246	0		0.722145	216.157	0		0.00334083
CTTGAGGCCTTTCTTACCCAGAAGCAGACAAGGTGGGAGAACTGAAGGATGACGACTTTGAG	LEAFLTQKQTRWEN*RMTTL	4	244	0		1.44429	214.4	0		0.00673643
CTTGAGGCCTTTCTTGAGGTGGGAGAACTGAAGGATGACGACTTTGAGAAGATCAGTGAGAG	LEAFLEVGELKDDDFEKISE	39	242	0		14.0818	212.643	0		0.066223
CTTGAGGCCTTTCTTACCCAGAAGCAGGCCTTTCTTACCCAGGTGGGAGAACTGAAGGATGA	LEAFLTQKQAFLTQVGELKD	12	242	0		4.33287	212.643	0		0.0203763
CTTGAGGCCTTTCTTACCCTGAAGCAGAAGGTGGGAGAACTGAAGGATGACGACTTTGAGAA	LEAFLTLKQKVGELKDDDFE	52	240	1187		18.7758	210.885	430.166		0.0890332
CTTGAGGCCTTTCTTACCCAGACGACTTTGAGAAGATCAGTGAGAGATCGGAAGAGCACACG	LEAFLTQTTLRRSVRDRKST	14	239	0		5.05502	210.007	0		0.0240708
CTTGAGGCCTTTCTGGGAGAACTGAAGGATGACGACTTTGAGAAGATCAGTGAGAGATCGGA	LEAFLGELKDDDFEKISERS	108	238	0		38.9958	209.128	0		0.186469
CTTGAGGCCTTTCGGATGACGACTTTGAGAAGATCAGTGAGAGATCGGAAGAGCACACGTCT	LEAFRMTTLRRSVRDRKSTR	68	237	0		24.5529	208.249	0		0.117902
CTTGAGGCCTTTCTTACCAACTGAAGGATGACGACTTTGAGAAGATCAGTGAGAGATCGGAA	LEAFLTN*RMTTLRRSVRDR	0	237	0		0	208.249	0		0
CTTGAGGCCTTTCTTACCCAGAAGAGGTGGGAGAACTGAAGGATGACGACTTTGAGAAGATC	LEAFLTQKRWEN*RMTTLRR	16	236	0		5.77716	207.37	0		0.0278591
CTTGAGGCCTTTCTTACCCAGAAGCAGGTGGGAGAACTGAAGGATGGCGACTTTGAGAAGAT	LEAFLTQKQVGELKDGDFEK	917	235	0		331.104	206.492	0		1.60347
CTTGAGGCCTTTCTTACGGATGACGACTTTGAGAAGATCAGTGAGAGATCGGAAGAGCACAC	LEAFLTDDDFEKISERSEEH	153	234	0		55.2441	205.613	0		0.26868
CTTGAGGCCTTTCTTACCCAGAAGCAGAAGGTGGGAGAACTGAAGGATGAAGACTTTGAGAA	LEAFLTQKQKVGELKDEDFE	28	233	1246		10.11	204.734	451.547		0.0493812
CTTGAGGCCTTTCTTACCCAGAGGCAGAAAGGTGGGAGAACTGAAGGATGACGACTTTGAGA	LEAFLTQRQKGGRTEG*RL*	826	233	0		298.246	204.734	0		1.45675
CTTGAGGCCTTTCTTACCCAGAAGCAGACCTTCTTTGAACCAGTAGCCACAGGCTGAGGTAG	LEAFLTQKQTFFEPVATG*G	0	233	0		0	204.734	0		0
CTTGCGGCCTTTCTTACCCAGAAGCAGAAGGTGGGAGAACTGAAGGATGACGACTTTGAGAA	LAAFLTQKQKVGELKDDDFE	358	232	1946		129.264	203.856	705.226		0.634096
CTTGAGGCCTTTCTTACCCAGAAGCAGGTGGGAGAACTGCAGGATGACGACTTTGAGAAGAT	LEAFLTQKQVGELQDDDFEK	937	231	0		338.325	202.977	0		1.66681
CTTGAGGCCTTTCTTACCCAGAAGAAGAACTGAAGGATGACGACTTTGAGAAGATCAGTGAG	LEAFLTQKKN*RMTTLRRSV	56	231	0		20.2201	202.977	0		0.0996175
CTTGAGGCCTTTCTTACCCAAAAGCAGAAGGTGGGAGAACTGAAGGATGACGACTTTGAGAA	LEAFLTQKQKVGELKDDDFE	28	230	1143		10.11	202.098	414.22		0.0500253
CTTGGGGCCTTTCTTACCCAGAAGCAGAAAGGTGGGAGAACTGAAGGATGACGACTTTGAGA	LGAFLTQKQKGGRTEG*RL*	807	230	0		291.386	202.098	0		1.4418
CTTGAGGCCTTTCTTACCCAGAAGCAGATAAGGTGGGAGAACTGAAGGATGACGACTTTGAG	LEAFLTQKQIRWEN*RMTTL	42	230	0		15.165	202.098	0		0.075038
CTTGAGGCCTGAGAACTGAAGGATGACGACTTTGAGAAGATCAGTGAGAGATCGGAAGAGCA	LEA*ELKDDDFEKISERSEE	7	230	0		2.52751	202.098	0		0.0125063
CTTGAGGCCTTTCTTACCCAGAAGCAGAGAACTGGGAGAACTGAAGGATGACGACTTTGAGA	LEAFLTQKQRTGRTEG*RL*	5	230	0		1.80536	202.098	0		0.00893309
CTTGAGGCCGAGAACTGAAGGATGACGACTTTGAGAAGATCAGTGAGAGATCGGAAGAGCAC	LEAEN*RMTTLRRSVRDRKS	0	230	0		0	202.098	0		0
CTTGAGGCCTTTCTTACCCAAAGGTGGGAGAACTGAAGGATGACGACTTTGAGAAGATCAGT	LEAFLTQRWEN*RMTTLRRS	1288	229	0		465.062	201.22	0		2.31121
CTTGAGGCCTTTCTTACCCAGAAGCAAGTGGGAGAACTGAAGGATGACGACTTTGAGAAGAT	LEAFLTQKQVGELKDDDFEK	169	229	0		61.0213	201.22	0		0.303257
CTTGAGGCCTTTCTTACCCAGAAGAAAGTGGGAGAACTGAAGGATGACGACTTTGAGAAGAT	LEAFLTQKKVGELKDDDFEK	129	227	0		46.5784	199.462	0		0.23352
CTTGAGGCCTTTCTTACCCAGAAGCAGGTGGGAGAACTGAAGGATGACGACTTGAGAAGATC	LEAFLTQKQVGELKDDDLRR	891	226	0		321.716	198.584	0		1.62005
CTTGAGGCCTTTCTTCCCCAGAAGCAGGTGGGAGAACTGAAGGATGACGACTTTGAGAAGAT	LEAFLPQKQVGELKDDDFEK	76	226	0		27.4415	198.584	0		0.138186
CTTGAGGCCTTTCTTACCCAGAAGCCTGAAGGATGACGACTTTGAGAAGATCAGTGAGAGAT	LEAFLTQKPEG*RL*EDQ*E	18	225	0		6.49931	197.705	0		0.0328738
CTTGAGGCCTTTCTTACCCAGAGACAGAAGGTGGGAGAACTAAAGGATGACGACTTTGAGAA	LEAFLTQRQKVGELKDDDFE	105	224	859		37.9126	196.826	311.299		0.19262
CTTGAGGCCTTTCTTACCCAGACTGAAGGATGACGACTTTGAGAAGATCAGTGAGAGATCGG	LEAFLTQTEG*RL*EDQ*EI	447	224	0		161.399	196.826	0		0.82001
CTTGAAGGTGGGAGAACTGAAGGATGACGACTTTGAGAAGATCAGTGAGAGATCGGAAGAGC	LEGGRTEG*RL*EDQ*EIGR	5	224	0		1.80536	196.826	0		0.00917237
CTTGAGGCCTTTCTTACCCAGAAGCAGAAAGGTGGGAGAACTGAAGGATGGCGACTTTGAGA	LEAFLTQKQKGGRTEGWRL*	956	223	0		345.185	195.947	0		1.76162
CTTGAGGCCTTTCTTACCCAGAAGCAGAAGGTGGGAGAACTGAAGGATGTCGACTTTGAGAA	LEAFLTQKQKVGELKDVDFE	49	221	1467		17.6926	194.19	531.637		0.0911095
CTTGAGGCCTTTCTTACCCAGAAGCAGAAAGGTGGGAGAACTGAAGGATGACGAATTTGAGA	LEAFLTQKQKGGRTEG*RI*	1429	221	0		515.973	194.19	0		2.65705
CTTGAGGCCTTTCTTACCCAGAAGCAGAAGGTGGGAGAACTGAAGGATGACGACTTTGAGGA	LEAFLTQKQKVGELKDDDFE	30	220	1176		10.8322	193.311	426.179		0.0560349
CTTGAGGCCTTTCTTACCCAGAAGCAGAAAGGTGGGAGCACTGAAGGATGACGACTTTGAGA	LEAFLTQKQKGGSTEG*RL*	843	219	0		304.384	192.433	0		1.58177
CTTGAGGCCTTTTCTTACCCAGAAGCAGGTGGGAGAACTGAAGGATGACGACTTTGAGAAGA	LEAFSYPEAGGRTEG*RL*E	0	219	0		0	192.433	0		0
CTTGAGGCCTTTCTTACCCAGAAGCGGGTGGGAGAACTGAAGGATGACGACTTTGAGAAGAT	LEAFLTQKRVGELKDDDFEK	674	216	0		243.363	189.797	0		1.28223
CTTGAGGCCTTTCTTACCCAGAAGCAGAGCTGAAGGATGACGACTTTGAGAAGATCAGTGAG	LEAFLTQKQS*RMTTLRRSV	93	216	0		33.5798	189.797	0		0.176925
CTTGAGGCCTTTCTTACCCAGAAGCAGAAGGTGGGAGAACTGAAGGATGACGACTTTGAGAC	LEAFLTQKQKVGELKDDDFE	52	213	1387		18.7758	187.161	502.645		0.100319
CTTGAGGCCTTTCTTACCCGGAAGCAGGTGGGAGAACTGAAGGATGACGACTTTGAGAAGAT	LEAFLTRKQVGELKDDDFEK	499	213	0		180.175	187.161	0		0.962677
CTTGAGGCCTTTCTTACCCAGAAGCTTCTGGGTAAGTGGGAGAACTGAAGGATGACGACTTT	LEAFLTQKLLGKWEN*RMTT	0	212	0		0	186.282	0		0
CTTGGGGCCTTTCTTACCCAGAAGCAGGTGGGAGAACTGAAGGATGACGACTTTGAGAAGAT	LGAFLTQKQVGELKDDDFEK	800	211	0		288.858	185.403	0		1.558
CTTGAGGCCATTCTTACCCAGAAGCAGAAGGTGGGAGAACTGAAGGATGACGACTTTGAGAA	LEAILTQKQKVGELKDDDFE	24	208	924		8.66574	182.767	334.855		0.0474141
CTTGAGGCCTTAACTGAAGGATGACGACTTTGAGAAGATCAGTGAGAGATCGGAAGAGCACA	LEALTEG*RL*EDQ*EIGRA	22	208	0		7.9436	182.767	0		0.0434629
CTTGAGGCCTTTCAACTGAAGGATGACGACTTTGAGAAGATCAGTGAGAGATCGGAAGAGCA	LEAFQLKDDDFEKISERSEE	32	207	0		11.5543	181.888	0		0.0635242
CTTGAGGCCTTTCTTACCCATGACGACTTTGAGAAGATCAGTGAGAGATCGGAAGAGCACAC	LEAFLTHDDFEKISERSEEH	0	207	0		0	181.888	0		0
CTTGAGGCCTTTCTTACCCAGAAGAAAGAACTGAAGGATGACGACTTTGAGAAGATCAGTGA	LEAFLTQKKELKDDDFEKIS	121	206	0		43.6898	181.01	0		0.241367
CTTGAGGCCTCTCTTACCCAGAAGCAGAAAGGTGGGAGAACTGAAGGATGACGACTTTGAGA	LEASLTQKQKGGRTEG*RL*	674	205	0		243.363	180.131	0		1.35103
CTTGAGGCCTTTCTTACCCAGGAGCAGAAAGGTGGGAGAACTGAAGGATGACGACTTTGAGA	LEAFLTQEQKGGRTEG*RL*	556	203	0		200.756	178.374	0		1.12548
CTTGAGGCCTTTCTTACCCAGAAGTGGGTGGGAGAACTGAAGGATGACGACTTTGAGAAGAT	LEAFLTQKWVGELKDDDFEK	1	203	0		0.361073	178.374	0		0.00202425
CTTGAGGCCTTTCTTACCCAGAAGCAACTTCAGGGAGAACTGAAGGATGACGACTTTGAGAA	LEAFLTQKQLQGELKDDDFE	0	203	0		0	178.374	0		0
CTGGGAGAACTGAAGGATGACGACTTTGAGAAGATCAGTGAGAGATCGGAAGAGCACACGTC	LGELKDDDFEKISERSEEHT	4	202	0		1.44429	177.495	0		0.00813708
CTTGAGGCCTTTCTTACCCAGAAGCTGAAGGTGGGAGAACTGAAGGATGACGACTTTGAGAA	LEAFLTQKLKVGELKDDDFE	105	200	908		37.9126	175.738	329.057		0.215734
CTTGAGGCCTTTCTTACCCAGAAGCAGAAGGTGGGAGAACTGAAGGATGACGACATTGAGAA	LEAFLTQKQKVGELKDDDIE	29	200	904		10.4711	175.738	327.607		0.0595837
CTCGAGGCCTTTCTTACCCAGAAGCAGAAAGGTGGGAGAACTGAAGGATGACGACTTTGAGA	LEAFLTQKQKGGRTEG*RL*	671	199	0		242.28	174.859	0		1.38557
CTTGAGGCCTTTCTTACCCAGAAGCAGAAAGGTGGGAGAACCGAAGGATGACGACTTTGAGA	LEAFLTQKQKGGRTEG*RL*	590	198	0		213.033	173.98	0		1.22447
CCTGAGGCCTTTCTTACCCAGAAGCAGGTGGGAGAACTGAAGGATGACGACTTTGAGAAGAT	PEAFLTQKQVGELKDDDFEK	518	198	0		187.036	173.98	0		1.07504
CTTGAGGCCTTTCTTACCCAGAAGCAGAAAGGTGGGAGGACTGAAGGATGACGACTTTGAGA	LEAFLTQKQKGGRTEG*RL*	674	197	0		243.363	173.102	0		1.4059
CTTGAGGCCTTTGGATGACGACTTTGAGAAGATCAGTGAGAGATCGGAAGAGCACACGTCTG	LEAFG*RL*EDQ*EIGRAHV	17	195	0		6.13823	171.344	0		0.035824
AGGTGGGAGAACTGAAGGATGACGACTTTGAGAAGATCAGTGAGAGATCGGAAGAGCACACG	RWEN*RMTTLRRSVRDRKST	0	195	0		0	171.344	0		0
CTTGAGGCCTTTCTTACCCAGAAGCAGAAGGTGGGAGAACAGAAGGATGACGACTTTGAGAA	LEAFLTQKQKVGEQKDDDFE	45	194	1085		16.2483	170.466	393.201		0.095317
CTTGAGGCCTTTCTTACCCAGAAGCAGAAAGGTGGGAGAGCTGAAGGATGACGACTTTGAGA	LEAFLTQKQKGGRAEG*RL*	613	193	0		221.338	169.587	0		1.30516
CTTGAGGCCTTTCTTACCCAGAAGCAGAACGGTGGGAGAACTGAAGGATGACGACTTTGAGA	LEAFLTQKQNGGRTEG*RL*	461	193	0		166.454	169.587	0		0.981529
CCTGAGGCCTTTCTTACCCAGAAGCAGAAAGGTGGGAGAACTGAAGGATGACGACTTTGAGA	PEAFLTQKQKGGRTEG*RL*	578	192	0		208.7	168.708	0		1.23705
CTTGAGGCCTTTCTTACCCAGAAGCAGAGGTGGGAGAACTGAAGGATGACGACTTTGAGAAA	LEAFLTQKQRWEN*RMTTLR	650	191	1		234.697	167.829	0.362397		1.39843
CTTGAGGCCTTTCTTACCCAGAAGCAGAACTTCTGGGAGAACTGAAGGATGACGACTTTGAG	LEAFLTQKQNFWEN*RMTTL	26	191	0		9.38789	167.829	0		0.0559371
CTTGAGGCCTTTCTTACCCAGAAGCTGCTTCTGGGAGAACTGAAGGATGACGACTTTGAGAA	LEAFLTQKLLLGELKDDDFE	0	191	0		0	167.829	0		0
CTCGAGGCCTTTCTTACCCAGAAGCAGGTGGGAGAACTGAAGGATGACGACTTTGAGAAGAT	LEAFLTQKQVGELKDDDFEK	591	190	1		213.394	166.951	0.362397		1.27818
CTTGGTGGGAGAACTGAAGGATGACGACTTTGAGAAGATCAGTGAGAGATCGGAAGAGCACA	LGGRTEG*RL*EDQ*EIGRA	65	190	0		23.4697	166.951	0		0.140579
CTTGAGGCCTTTCTTACCCAGAAGCAGGTGGGAGAACTGAAGGATGACGCCTTTGAGAAGAT	LEAFLTQKQVGELKDDAFEK	247	188	0		89.1849	165.193	0		0.539882
CTTGAGGCCTTTCTTACCCAGAAGCTTACCCAGAAGGATGACGACTTTGAGAAGATCAGTGA	LEAFLTQKLTQKDDDFEKIS	0	188	0		0	165.193	0		0
CTTGAGGCCTTTCTTACCCAGAAGCAGGTGGGAGGACTGAAGGATGACGACTTTGAGAAGAT	LEAFLTQKQVGGLKDDDFEK	672	187	0		242.641	164.315	0		1.47668
CTTGAGGCCTGGGAGAACTGAAGGATGACGACTTTGAGAAGATCAGTGAGAGATCGGAAGAG	LEAWEN*RMTTLRRSVRDRK	0	186	0		0	163.436	0		0
CTTGAGGCCTTTCTTACCCAGGAGCAGGTGGGAGAACTGAAGGATGACGACTTTGAGAAGAT	LEAFLTQEQVGELKDDDFEK	505	185	0		182.342	162.557	0		1.12171
CTTGAGGCCTTTCTTACCCAGAAGCAGAGGAAGGATGACGACTTTGAGAAGATCAGTGAGAG	LEAFLTQKQRKDDDFEKISE	1	185	0		0.361073	162.557	0		0.0022212
CTTGAGGCCTTTCTTACCCAGAAGCAGGTGGGAGAGCTGAAGGATGACGACTTTGAGAAGAT	LEAFLTQKQVGELKDDDFEK	664	184	1		239.752	161.679	0.362397		1.48289
CTTGAGGCCTTTCTTACCCAGAAGCAGTGGGAGAACTGCTTCTCCCACTGCTTCTAGAACTG	LEAFLTQKQWENCFSHCF*N	0	184	0		0	161.679	0		0
CTTGAGGCCTTTCTTCCCAAGAAGCAGAAGGTGGGAGAACTGAAGGATGACGACTTTGAGAA	LEAFLPKKQKVGELKDDDFE	0	182	11		0	159.921	3.98637		0
CTTGAGGCCTTTCTTACCCAGACTTTGAGAAGATCAGTGAGAGATCGGAAGAGCACACGTCT	LEAFLTQTLRRSVRDRKSTR	57	181	0		20.5811	159.043	0		0.129406
CTTGAGGCCTTTCTTACCCACTGAAGGATGACGACTTTGAGAAGATCAGTGAGAGATCGGAA	LEAFLTH*RMTTLRRSVRDR	37	181	0		13.3597	159.043	0		0.0840007
CTTGAGGCCTTTCTTAGTGGGAGAACTGAAGGATGACGACTTTGAGAAGATCAGTGAGAGAT	LEAFLSGRTEG*RL*EDQ*E	0	181	0		0	159.043	0		0
CTTGAGGCCTTTCTTACCCAGAAGCCGAAGGTGGGAGAACTGAAGGATGACGACTTTGAGAA	LEAFLTQKPKVGELKDDDFE	25	178	3048		9.02682	156.407	1104.59		0.0577138
CTTGAGGCCTTTCTTACCCAGAAGCAGAAGGTGGGAGAACTGAAGGATGACGACTATGAGAA	LEAFLTQKQKVGELKDDDYE	24	178	461		8.66574	156.407	167.065		0.0554053
CTTGAGGCCTTTCTTACCCAGAAGCAGAACTGGGTGGGAGAACTGAAGGATGACGACTTTGA	LEAFLTQKQNWVGELKDDDF	1	178	0		0.361073	156.407	0		0.00230855
ATTGAGGCCTTTCTTACCCAGAAGCAGAAGGTGGGAGAACTGAAGGATGACGACTTTGAGAA	IEAFLTQKQKVGELKDDDFE	101	177	550		36.4683	155.528	199.319		0.234481
CTTGAGGCCTTTAACTGAAGGATGACGACTTTGAGAAGATCAGTGAGAGATCGGAAGAGCAC	LEAFN*RMTTLRRSVRDRKS	11	177	0		3.9718	155.528	0		0.0255375
CTTGAGGCCTTTCTTACCCAGAAGCAGAGGCCTTTCTTACCCAGGTGGGAGAACTGAAGGAT	LEAFLTQKQRPFLPRWEN*R	7	177	0		2.52751	155.528	0		0.0162512
CTTGAGGCCTTTCTTACCCAGAAGGCCTTTCTTAACTGAAGGATGACGACTTTGAGAAGATC	LEAFLTQKAFLN*RMTTLRR	0	177	0		0	155.528	0		0
CTTGAGGCCTTTCTTACCCAGAAGCAGGAACTGAACTTTGAGAAGATCAGTGAGAGATCGGA	LEAFLTQKQELNFEKISERS	0	177	0		0	155.528	0		0
CTTGAGGCCTTTCTTACCCAGAACCTAGGTGGGAGAACTGAAGGATGACGACTTTGAGAAGA	LEAFLTQNLGGRTEG*RL*E	0	177	0		0	155.528	0		0
CTTGAGGCCTTTCTTACCCAGAAGCAGATGAAGGATGACGACTTTGAGAAGATCAGTGAGAG	LEAFLTQKQMKDDDFEKISE	2031	176	0		733.338	154.649	0		4.74195
CTTGAGGCCTTTCCTACCCAGAAGCAGAAAGGTGGGAGAACTGAAGGATGACGACTTTGAGA	LEAFPTQKQKGGRTEG*RL*	617	176	0		222.782	154.649	0		1.44056
CTTGAGGCCTTTAGGATGACGACTTTGAGAAGATCAGTGAGAGATCGGAAGAGCACACGTCT	LEAFRMTTLRRSVRDRKSTR	41	175	0		14.804	153.77	0		0.0962732
CTTGAGGCCTTTCTTACCCAGAAGATGACGACTTTGAGAAGATCAGTGAGAGATCGGAAGAG	LEAFLTQKMTTLRRSVRDRK	20	175	0		7.22145	153.77	0		0.0469625
CTTGAGGCCTTTCTTACCCAGAAGCAGGTGGGAGAACCGAAGGATGACGACTTTGAGAAGAT	LEAFLTQKQVGEPKDDDFEK	576	174	0		207.978	152.892	0		1.36029
CTTGAGGCCTTTCTTAGGATGACGACTTTGAGAAGATCAGTGAGAGATCGGAAGAGCACACG	LEAFLRMTTLRRSVRDRKST	235	173	0		84.8521	152.013	0		0.558189
CTTGAGGCAGGTGGGAGAACTGAAGGATGACGACTTTGAGAAGATCAGTGAGAGATCGGAAG	LEAGGRTEG*RL*EDQ*EIG	52	173	0		18.7758	152.013	0		0.123514
CTTGAGGCCTTTCTTACCCAGAGGCAGAAGGTGGGAGAACTAAAGGATGACGACTTTGAGAA	LEAFLTQRQKVGELKDDDFE	60	171	1274		21.6644	150.256	461.694		0.144183
CTTGAGGCCTTTCTTACCCGGAAGCAGAAAGGTGGGAGAACTGAAGGATGACGACTTTGAGA	LEAFLTRKQKGGRTEG*RL*	498	171	0		179.814	150.256	0		1.19672
CTTGAGGCCTTTCTTACAGGATGACGACTTTGAGAAGATCAGTGAGAGATCGGAAGAGCACA	LEAFLTG*RL*EDQ*EIGRA	20	171	0		7.22145	150.256	0		0.0480611
CTTGAGGCCTTTCTTACCCAGAAGCAGAAGGTGGGAGACCTGAAGGATGACGACTTTGAGAA	LEAFLTQKQKVGDLKDDDFE	42	169	1460		15.165	148.498	529.1		0.102123
CTTGAGGCCTTTCTTACCCAGTAGCAGAAGGTGGGAGAACTGAAGGATGACGACTTTGAGAA	LEAFLTQ*QKVGELKDDDFE	16	168	942		5.77716	147.62	341.378		0.0391355
CTTGAGGCCTTTCTTACCCAGAAGCAGAAGGTGGGAGAACTGAAGGATGACGACTTTGAAGA	LEAFLTQKQKVGELKDDDFE	19	168	787		6.86038	147.62	285.207		0.0464734
CTTGAGGCCGAACTGAAGGATGACGACTTTGAGAAGATCAGTGAGAGATCGGAAGAGCACAC	LEAELKDDDFEKISERSEEH	28	168	0		10.11	147.62	0		0.0684871
CTTGAGGCCTTTCTTACCCAGAAGCACTGGGAGAACTGAAGGATGACGACTTTGAGAAGATC	LEAFLTQKHWEN*RMTTLRR	18	168	0		6.49931	147.62	0		0.0440274
CTTGAGGCCTTTCTAGGTGGGAGAACTGAAGGATGACGACTTTGAGAAGATCAGTGAGAGAT	LEAFLGGRTEG*RL*EDQ*E	21	167	0		7.58252	146.741	0		0.0516729
CTTGAGGCCTTTCTTACCCAGAAGCAGAAAGGTGGGAGAACTGAAGGGTGACGACTTTGAGA	LEAFLTQKQKGGRTEG*RL*	585	166	0		211.227	145.862	0		1.44813
CTTGAGGCCTTTCTTACCCAGAAGCAGAAGAACTGAAGGTGGGAGAACTGAAGGATGACGAC	LEAFLTQKQKN*RWEN*RMT	325	166	0		117.349	145.862	0		0.804517
CTTGAGGCCTTTCTTACCCAGAAGCAAGGATGACGACTTTGAGAAGATCAGTGAGAGATCGG	LEAFLTQKQG*RL*EDQ*EI	72	166	0		25.9972	145.862	0		0.178231
CTTGAGGCCTTTCTAACTGAAGGATGACGACTTTGAGAAGATCAGTGAGAGATCGGAAGAGC	LEAFLTEG*RL*EDQ*EIGR	6	166	0		2.16644	145.862	0		0.0148526
CTTGAGGCCTTTCATACCCAGAAGCAGAAGGTGGGAGAACTGAAGGATGACGACTTTGAGAA	LEAFHTQKQKVGELKDDDFE	27	165	827		9.74896	144.984	299.703		0.0672418
CTTGAGGCCTTTAGAACTGAAGGATGACGACTTTGAGAAGATCAGTGAGAGATCGGAAGAGC	LEAFRTEG*RL*EDQ*EIGR	2565	165	0		926.151	144.984	0		6.38797
CTTGAGGCCTTTCTTACCCAGAAGCAGGTGGGCGAACTGAAGGATGACGACTTTGAGAAGAT	LEAFLTQKQVGELKDDDFEK	234	165	0		84.491	144.984	0		0.582763
CTTGAGGCCTTTCTTACCCAGAAGCAGAAGAGAACTGAAGGATGACGACTTTGAGAAGATCA	LEAFLTQKQKRTEG*RL*ED	36	163	0		12.9986	143.226	0		0.0907558
CTTGAGGCCTTTCCTACCCAGAAGCAGGTGGGAGAACTGAAGGATGACGACTTTGAGAAGAT	LEAFPTQKQVGELKDDDFEK	601	162	0		217.005	142.348	0		1.52447
CTTGAGGCCTTTCTTACCCAGAAGCTTGTGGGAGAACTGAAGGATGACGACTTTGAGAAGAT	LEAFLTQKLVGELKDDDFEK	5	162	0		1.80536	142.348	0		0.0126828
CTTGAGGCCTTTCTTGAGAACTGAAGGATGACGACTTTGAGAAGATCAGTGAGAGATCGGAA	LEAFLEN*RMTTLRRSVRDR	0	161	0		0	141.469	0		0
CTTGAGGCCTTTCTTACCCAGATGGGAGAACTGAAGGATGACGACTTTGAGAAGATCAGTGA	LEAFLTQMGELKDDDFEKIS	351	160	0		126.736	140.59	0		0.901461
CTTGAGGTGGGCGAACTGAAGGATGACGACTTTGAGAAGATCAGTGAGAGATCGGAAGAGCA	LEVGELKDDDFEKISERSEE	24	159	0		8.66574	139.711	0		0.062026
CTTGAGGCCTTTCTTACCCAGAAGCACAGAAGGTGGGAGAACTGAAGGATGACGACTTTGAG	LEAFLTQKHRRWEN*RMTTL	0	158	0		0	138.833	0		0
CTTGAGGCCTTGAGAACTGAAGGATGACGACTTTGAGAAGATCAGTGAGAGATCGGAAGAGC	LEALRTEG*RL*EDQ*EIGR	1842	157	0		665.096	137.954	0		4.82114
CTTGAGGCCTTTCTTACCCAGAAGCATTCAGTGGGAGAACTGAAGGATGACGACTTTGAGAA	LEAFLTQKHSVGELKDDDFE	0	157	0		0	137.954	0		0
CTTGAGGCCTTTCTTACCCAGAGATAGAAGGTGGGAGAACTGAAGGATGACGACTTTGAGAA	LEAFLTQR*KVGELKDDDFE	406	156	1836		146.595	137.075	665.362		1.06945
CTTGAGGCCTTTCTTACCCAGAAGCAGAAGGTGGGAGTACTGAAGGATGACGACTTTGAGAA	LEAFLTQKQKVGVLKDDDFE	46	156	833		16.6093	137.075	301.877		0.121169
CTTGAGGCCTTGAACTGAAGGATGACGACTTTGAGAAGATCAGTGAGAGATCGGAAGAGCAC	LEALN*RMTTLRRSVRDRKS	32	156	0		11.5543	137.075	0		0.0842918
CTTGAGGCCTTTCTTACCCAGAAGCAGAGGTGGGAGAACTGAAGGATGACGACTTTGAGAGA	LEAFLTQKQRWEN*RMTTLR	426	155	1		153.817	136.197	0.362397		1.12937
CTTGAGGCCTTTCTTACACTGAAGGATGACGACTTTGAGAAGATCAGTGAGAGATCGGAAGA	LEAFLTLKDDDFEKISERSE	50	155	0		18.0536	136.197	0		0.132556
CTTGAGGCCTTTCTTACCCAGAAGCAGAACTGAAGATGACGACTTTGAGAAGATCAGTGAGA	LEAFLTQKQN*R*RL*EDQ*	3	155	0		1.08322	136.197	0		0.00795333
CTTGAGGCCTTTCTTACCCAGAAGCAGAACTGAAGGATGGTGGGAGAACTGAAGGAAGGTGG	LEAFLTQKQN*RMVGELKEG	0	155	0		0	136.197	0		0
CTTGAGGCCTTTCTTACCCAGAAGCAGAACTGAAGGATGACGAGAACTGAAGGATGGGAGAA	LEAFLTQKQN*RMTRTEGWE	0	154	0		0	135.318	0		0
CTTGAGGCATTTCTTACCCAGAAGCAGAAGGTGGGAGAACTGAAGGATGACGACTTTGAGAA	LEAFLTQKQKVGELKDDDFE	14	153	314		5.05502	134.439	113.793		0.0376007
CTTGAGGCCTTTCTTACCCAGAAGCAGAAAGGTGGGAGAACTGGAGGATGACGACTTTGAGA	LEAFLTQKQKGGRTGG*RL*	435	153	0		157.067	134.439	0		1.16831
CTTGAGGCCTTTAAGGATGACGACTTTGAGAAGATCAGTGAGAGATCGGAAGAGCACACGTC	LEAFKDDDFEKISERSEEHT	18	153	0		6.49931	134.439	0		0.0483438
CTGAAGGATGACGACTTTGAGAAGATCAGTGAGAGATCGGAAGAGCACACGTCTGAACTCCA	LKDDDFEKISERSEEHTSEL	32	152	0		11.5543	133.561	0		0.08651
CTTGAGGCCTTTCTTACCCAGAAGCAGAAGGTGGGAGAACTGAAGGATGACGACTTTGAGAT	LEAFLTQKQKVGELKDDDFE	28	151	881		10.11	132.682	319.272		0.0761975
CTTGAGGCCTTTCTTACCCAGAAGCAGAAGGTGGGAGAACTGAAGGATGACGACTTTGGGAA	LEAFLTQKQKVGELKDDDFG	22	151	803		7.9436	132.682	291.005		0.0598695
CTTGAGGCCTTTCTTACCCAGAAGCAGATATGAAAAGAAATTGACCTTGAGGACTTGGTTCA	LEAFLTQKQI*KEIDLEDLV	54	151	0		19.4979	132.682	0		0.146952
CTTGAGGCCTTTCTTATGACGACTTTGAGAAGATCAGTGAGAGATCGGAAGAGCACACGTCT	LEAFLMTTLRRSVRDRKSTR	6	151	0		2.16644	132.682	0		0.016328
CTTGAGGCCTTTCTTACCCAGAAGCAGCAAGGTGGGAGAACTGAAGGATGACGACTTTGAGA	LEAFLTQKQQGGRTEG*RL*	589	150	0		212.672	131.803	0		1.61355
CTTGAGGCCTTTCTTACCCAGAAGCAGTAAGTGGGAGAACTGAAGGATGACGACTTTGAGAA	LEAFLTQKQ*VGELKDDDFE	5329	148	3		1924.16	130.046	1.08719		14.796
CTTGAGGCCTCTCTTACCCAGAAGCAGGTGGGAGAACTGAAGGATGACGACTTTGAGAAGAT	LEASLTQKQVGELKDDDFEK	496	148	0		179.092	130.046	0		1.37715
CTTGAGGCCTTTCTTGCCCAGAAGCAGGTGGGAGAACTGAAGGATGACGACTTTGAGAAGAT	LEAFLAQKQVGELKDDDFEK	390	148	0		140.818	130.046	0		1.08284
CTTGAGGTGGAGAACTGAAGGATGACGACTTTGAGAAGATCAGTGAGAGATCGGAAGAGCAC	LEVEN*RMTTLRRSVRDRKS	5	148	0		1.80536	130.046	0		0.0138825
CTTGAGGCCTTTCTTACCCAGAAGCAGATTAGGTGGGAGAACTGAAGGATGACGACTTTGAG	LEAFLTQKQIRWEN*RMTTL	1	148	0		0.361073	130.046	0		0.0027765
CTTGAGGCCTTTCTTACCCAGAAGCAGAAGGTGTGAGAACTGAAGGATGACGACTTTGAGAA	LEAFLTQKQKV*ELKDDDFE	13	147	804		4.69394	129.167	291.368		0.0363401
CTTGAGGCCTTTCTTACCCAGAAGCAGTTTCTTACCCAGGTGGGAGAACTGAAGGATGACGA	LEAFLTQKQFLTQVGELKDD	0	147	0		0	129.167	0		0
CTTGAGGCCTTTCTTACCCAGAAGCAGAAAGGTGGGAGAACTGAAGGATGACGCCTTTGAGA	LEAFLTQKQKGGRTEG*RL*	538	146	0		194.257	128.288	0		1.51422
CTTGAGGCCTTTCTTACCCAGAAGCATGGGAGAACTGAAGGATGACGACTTTGAGAAGATCA	LEAFLTQKHGRTEG*RL*ED	1	146	0		0.361073	128.288	0		0.00281454
CTTGAGGCTTTCAGAAGGTGGGAGAACTGAAGGATGACGACTTTGAGAAGATCAGTGAGAGA	LEAFRRWEN*RMTTLRRSVR	0	146	0		0	128.288	0		0
CTTGAGGCCTTTCTTACCCAGAAGCAGTAAGAAGGTGGGAGAACTGAAGGATGACGACTTTG	LEAFLTQKQ*EGGRTEG*RL	3	145	0		1.08322	127.41	0		0.00850184
CTTGAGGCCTTTCTTACCCAGAAGCAGGTGGAGAGAACTGAAGGATGACGACTTTGAGAAGA	LEAFLTQKQVERTEG*RL*E	2	145	0		0.722145	127.41	0		0.00566789
CTTGAGGCCTTTCTTACCCAGAAGCAGAACTTTCTTACCCAGGTGGGAGAACTGAAGGATGA	LEAFLTQKQNFLTQVGELKD	2	144	0		0.722145	126.531	0		0.00570725
CTTGAGGCCTTTCTTACCCAGAAGCAGAAGAAGAAGGTGGGAGAACTGAAGGATGACGACTT	LEAFLTQKQKKKVGELKDDD	388	143	0		140.096	125.652	0		1.11495
CTTGAGGCCTTTCTTACCCAGAAGTTAAGGGAGGGCTTACTCCAAGAGAGGTGGGAGAACTG	LEAFLTQKLREGLLQERWEN	0	143	0		0	125.652	0		0
CTTGAGGCCTTTCTTGAACTGAAGGATGACGACTTTGAGAAGATCAGTGAGAGATCGGAAGA	LEAFLELKDDDFEKISERSE	19	142	0		6.86038	124.774	0		0.0549826
CTTGAGGCCTAGGTGGGAGAACTGAAGGATGACGACTTTGAGAAGATCAGTGAGAGATCGGA	LEA*VGELKDDDFEKISERS	7	142	0		2.52751	124.774	0		0.0202567
CTTGAGGCCTTTCTTACCCAGAAGCAGAATGGGAGAACTGAAGGATGACGACTTTGAGAAGA	LEAFLTQKQNGRTEG*RL*E	23	141	0		8.30467	123.895	0		0.0670299
CTTGAGGCCTTTCTTACCCAGAAGCAGAAGGTGGGAGAACTGAAGGCTGACGACTTTGAGAA	LEAFLTQKQKVGELKADDFE	25	140	1193		9.02682	123.016	432.34		0.073379
CTTGAGGCCTTTTTTACCCAGAAGCAGAAGGTGGGAGAACTGAAGGATGACGACTTTGAGAA	LEAFFTQKQKVGELKDDDFE	43	140	945		15.5261	123.016	342.466		0.126212
CTTGAGGCCTTTCTTACCCAGAAGCGAACTGAAGGATGACGACTTTGAGAAGATCAGTGAGA	LEAFLTQKRTEG*RL*EDQ*	4	140	0		1.44429	123.016	0		0.0117406
CTTGAGGCCTTTCTTACCCAGAAGCAGGTGGGAGAACTGAAGGGTGACGACTTTGAGAAGAT	LEAFLTQKQVGELKGDDFEK	713	139	0		257.445	122.138	0		2.10782
CTTGAGGCCTAGGATGACGACTTTGAGAAGATCAGTGAGAGATCGGAAGAGCACACGTCTGA	LEA*DDDFEKISERSEEHTS	0	139	0		0	122.138	0		0
CTTGAGGCCTTTCTTACCCAGCAGCAGAAAGGTGGGAGAACTGAAGGATGACGACTTTGAGA	LEAFLTQQQKGGRTEG*RL*	970	138	0		350.24	121.259	0		2.88837
CTTGACTGAAGGATGACGACTTTGAGAAGATCAGTGAGAGATCGGAAGAGCACACGTCTGAA	LD*RMTTLRRSVRDRKSTRL	11	138	0		3.9718	121.259	0		0.0327547
CTTGAGGCCTTTCTTACCCAGAATGACGACTTTGAGAAGATCAGTGAGAGATCGGAAGAGCA	LEAFLTQNDDFEKISERSEE	0	138	0		0	121.259	0		0
CTTGAGGCCTTTCTTACCCAGAAGCAGAAGGTGGGAGAACTGAAGGAAGACGACTTTGAGAA	LEAFLTQKQKVGELKEDDFE	28	137	537		10.11	120.38	194.607		0.0839841
CTTGAGGCCTTTCTTACCCAGAAGAAGAAAGGTGGGAGAACTGAAGGATGACGACTTTGAGA	LEAFLTQKKKGGRTEG*RL*	314	137	0		113.377	120.38	0		0.941822
CTTGAGGCCTTTCTTACGACTTTGAGAAGATCAGTGAGAGATCGGAAGAGCACACGTCTGAA	LEAFLTTLRRSVRDRKSTRL	33	136	0		11.9154	119.502	0		0.0997091
CTTGGGGTGGGAGAACTGAAGGATGACGACTTTGAGAAGATCAGTGAGAGATCGGAAGAGCA	LGVGELKDDDFEKISERSEE	4345	135	1		1568.86	118.623	0.362397		13.2256
CTTGAGGCCTTTCTTACCCAGCAGCAGGTGGGAGAACTGAAGGATGACGACTTTGAGAAGAT	LEAFLTQQQVGELKDDDFEK	1166	134	0		421.011	117.744	0		3.57564
CTTGAGGCCTTTCTTACCACTGAAGGATGACGACTTTGAGAAGATCAGTGAGAGATCGGAAG	LEAFLTTEG*RL*EDQ*EIG	31	134	0		11.1933	117.744	0		0.0950641
CTTGAGGCCTTTCTTACCCAGAACCAGGTGGGAGAACTGAAGGATGACGACTTTGAGAAGAT	LEAFLTQNQVGELKDDDFEK	2153	133	0		777.389	116.866	0		6.652
CTTGAGGCCTTTCTTGCCCAGAAGCAGAAAGGTGGGAGAACTGAAGGATGACGACTTTGAGA	LEAFLAQKQKGGRTEG*RL*	450	133	0		162.483	116.866	0		1.39034
CTTGAGGCCTTTCTTACCCAGAAACTGAAGGATGACGACTTTGAGAAGATCAGTGAGAGATC	LEAFLTQKLKDDDFEKISER	99941	132	3		36086	115.987	1.08719		311.121
CTTGAGGCCTTTCTTACCCAGAGGATGACGACTTTGAGAAGATCAGTGAGAGATCGGAAGAG	LEAFLTQRMTTLRRSVRDRK	1340	132	0		483.837	115.987	0		4.17148
CTTGAGGCCTTTCTTACCCAGAAGGTGGGAGAACTGAAGGATGACGACTTTGAGAAATCAGT	LEAFLTQKVGELKDDDFEKS	286	132	0		103.267	115.987	0		0.890332
CTTGAGGCCTTTCTTACGAACTGAAGGATGACGACTTTGAGAAGATCAGTGAGAGATCGGAA	LEAFLTN*RMTTLRRSVRDR	17	132	0		6.13823	115.987	0		0.0529218
CTTGAGGCCTTTCTGAGAACTGAAGGATGACGACTTTGAGAAGATCAGTGAGAGATCGGAAG	LEAFLRTEG*RL*EDQ*EIG	12	132	0		4.33287	115.987	0		0.0373566
CTTGAGGCCTTTCTTACTGAACTGAAGGATGACGACTTTGAGAAGATCAGTGAGAGATCGGA	LEAFLTELKDDDFEKISERS	0	132	0		0	115.987	0		0
CTTGAGGCCTTTCTCACCCAGAAGCAGAAAGGTGGGAGAACTGAAGGATGACGACTTTGAGA	LEAFLTQKQKGGRTEG*RL*	453	131	0		163.566	115.108	0		1.42098
CTTGAGGCCTTTCTCACCCAGAAGCAGGTGGGAGAACTGAAGGATGACGACTTTGAGAAGAT	LEAFLTQKQVGELKDDDFEK	401	131	0		144.79	115.108	0		1.25786
CTTGAGGCCTTTCTTACCCAGAAGCAGGTGGAAGAACTGAAGGATGACGACTTTGAGAAGAT	LEAFLTQKQVEELKDDDFEK	223	131	0		80.5192	115.108	0		0.699509
CTTGAGGCCTTTCTTAACCAGAAGCAGGTGGGAGAACTGAAGGATGACGACTTTGAGAAGAT	LEAFLNQKQVGELKDDDFEK	61	131	0		22.0254	115.108	0		0.191345
CTTGAGGCCTTTGGGAGAACTGAAGGATGACGACTTTGAGAAGATCAGTGAGAGATCGGAAG	LEAFGRTEG*RL*EDQ*EIG	404	130	0		145.873	114.229	0		1.27702
CTTGAGGCCTTTCTTACCCAGAAGCAAAGGAGAACTGGGTGGGAGAACTGAAGGATGACGAC	LEAFLTQKQRRTGWEN*RMT	18	129	0		6.49931	113.351	0		0.057338
CTTGAGGCCTTTCTTACCCAGAAGCAGAAGGTGGGAGAACTGAAGGATGACGACTTTGATAA	LEAFLTQKQKVGELKDDDFD	46	128	864		16.6093	112.472	313.111		0.147675
CTTGAGGCCTTTCTTACCCAGAAGAGAGAACTGAAGGATGACGACTTTGAGAAGATCAGTGA	LEAFLTQKRELKDDDFEKIS	14	128	0		5.05502	112.472	0		0.0449446
CTTGAGGCCTTTCTTGGAGAACTGAAGGATGACGACTTTGAGAAGATCAGTGAGAGATCGGA	LEAFLGELKDDDFEKISERS	0	128	0		0	112.472	0		0
CTTGAGGTCTTTCTTACCCAGAAGCAGAAAGGTGGGAGAACTGAAGGATGACGACTTTGAGA	LEVFLTQKQKGGRTEG*RL*	479	127	0		172.954	111.593	0		1.54986
CTTGAGGCCTTTCTTAACCAGAAGCAGAAAGGTGGGAGAACTGAAGGATGACGACTTTGAGA	LEAFLNQKQKGGRTEG*RL*	65	127	0		23.4697	111.593	0		0.210315
CTTGAGGCCTTTCTTAAAGGTGGGAGAACTGAAGGATGACGACTTTGAGAAGATCAGTGAGA	LEAFLKGGRTEG*RL*EDQ*	32	127	0		11.5543	111.593	0		0.103539
CTTGAGGCCTTTCTTACCCAGAAGCAGAAGGTGGGAGAACTGAAGGATGACGACTTAGAGAA	LEAFLTQKQKVGELKDDDLE	14	126	714		5.05502	110.715	258.752		0.045658
CTTGAGGCCTTTCTTACCCAGAAACAGAAGGTGGGAGAACTAAAGGATGACGACTTTGAGAA	LEAFLTQKQKVGELKDDDFE	34	126	492		12.2765	110.715	178.3		0.110884
CTTGAGGCCTTTCTTACCCAGAAGCAGAAAGGTGGGAGAACTGAAGGATAACGACTTTGAGA	LEAFLTQKQKGGRTEG*RL*	470	126	0		169.704	110.715	0		1.53281
CTTGAGGCCTTTCTTACCCAGAAGCAGGTGGGAGAACTGAAGGATGACGACATTGAGAAGAT	LEAFLTQKQVGELKDDDIEK	323	126	0		116.626	110.715	0		1.0534
CTTGAGGCCTTTGAAGGATGACGACTTTGAGAAGATCAGTGAGAGATCGGAAGAGCACACGT	LEAFEG*RL*EDQ*EIGRAH	17	126	0		6.13823	110.715	0		0.0554419
CTTGAGGCCTTTCTTACCCAGAAGCTTCCATTGGGAGAACTGAAGGATGACGACTTTGAGAA	LEAFLTQKLPLGELKDDDFE	0	126	0		0	110.715	0		0
CTTGAGGCCTTTCTTACCCAGAAGCAGAAGCTTGTGGGAGAACTGAAGGATGACGACTTTGA	LEAFLTQKQKLVGELKDDDF	0	126	0		0	110.715	0		0
CTTGAGGCCTTTCTTACCCAGAAGCAGAAAAAGGTGGGAGAACTGAAGGATGACGACTTTGA	LEAFLTQKQKKVGELKDDDF	808	125	0		291.747	109.836	0		2.6562
CTTGAGGCCTTTCTTACAAGGTGGGAGAACTGAAGGATGACGACTTTGAGAAGATCAGTGAG	LEAFLTRWEN*RMTTLRRSV	30	125	0		10.8322	109.836	0		0.0986214
CTTGAGGCCTTTCTTACCCAGAAGCACCAGAAGGTGGGAGAACTGAAGGATGACGACTTTGA	LEAFLTQKHQKVGELKDDDF	13	125	0		4.69394	109.836	0		0.0427359
CTTGAGGCCTTTCTTACCCAGAAGCAGAGAGAACTTACTCTCTCTGGGAGAACTGAAGGATG	LEAFLTQKQRELTLSGRTEG	0	125	0		0	109.836	0		0
CTTGAGGCCTTTCTTACCCAGAAGCAGAACTGAAGGATGACGACTTTGAGAAGATCAGAGAG	LEAFLTQKQN*RMTTLRRSE	199	124	0		71.8535	108.957	0		0.659464
CTTGAGGCCTTTCTTACCCAGAAGCGGTGGGAGAACTGAAGGATGACGACTTTGAGAAGATC	LEAFLTQKRWEN*RMTTLRR	27	124	0		9.74896	108.957	0		0.089475
CTTGTGGGAGAACTGAAGGATGACGACTTTGAGAAGATCAGTGAGAGATCGGAAGAGCACAC	LVGELKDDDFEKISERSEEH	8	124	0		2.88858	108.957	0		0.0265111
CTTGAGGCCTGAAGGCTGACGACTTTGAGAAGATCAGTGAGAGATCGGAAGAGCACACGTCT	LEA*RLTTLRRSVRDRKSTR	4	124	0		1.44429	108.957	0		0.0132556
CTTGAGGCCTTTCTTACCCAGAAGCAGTTCTGGGAGAACTGAAGGATGACGACTTTGAGAAG	LEAFLTQKQFWEN*RMTTLR	0	124	0		0	108.957	0		0
CTTGAGGCCTTTCTTACCCAGAAGCAGAGAACTGAAGTTCACCCAGGTGGGAGAACTGAAGG	LEAFLTQKQRTEVHPGGRTE	0	124	0		0	108.957	0		0
CTTGAGGCCTTTCTTACCCAGAAGCAGAAGGTGGGAGAACTGAAGGATGACGACTTTAGAAG	LEAFLTQKQKVGELKDDDFR	20	123	667		7.22145	108.079	241.719		0.0668166
CTTGAGGCCTTTCTTACCCAGAAGCAGAAGGTGGGAGAACTGAAGGTTGACGACTTTGAGAA	LEAFLTQKQKVGELKVDDFE	22	123	342		7.9436	108.079	123.94		0.0734983
CTTGAGGCCTTTCTTACCCAGAAGCAGAGGTGGGAGAACTGAAGGATGACGAATTTGAGAAG	LEAFLTQKQRWEN*RMTNLR	482	123	1		174.037	108.079	0.362397		1.61028
CTTGAGGCCTTTCTTACCCAGAAGCAGGTGGGAGAACTGGAGGATGACGACTTTGAGAAGAT	LEAFLTQKQVGELEDDDFEK	350	123	0		126.375	108.079	0		1.16929
CTTGAGGCCTTTCTTACCCAGAAGCAGAACTGAAGGATGACGACTTTGAGAAGATCAGTGAA	LEAFLTQKQN*RMTTLRRSV	172	123	0		62.1045	108.079	0		0.574623
CTTGAGGCCTTTCTTACCCAGAAGAAAGGAGAACTGAAGGATGACGACTTTGAGAAGATCAG	LEAFLTQKKGELKDDDFEKI	28	123	0		10.11	108.079	0		0.0935433
TGAAGGATGACGACTTTGAGAAGATCAGTGAGAGATCGGAAGAGCACACGTCTGAACTCCAG	*RMTTLRRSVRDRKSTRLNS	0	123	0		0	108.079	0		0
CTTGAGGCCTTTCTTACCCAGAAGCAGAAGAACTGAAGGATGAACTGAAGATGACGACTTTG	LEAFLTQKQKN*RMN*R*RL	0	123	0		0	108.079	0		0
CTTGAGGCCTTCCTTACCCAGAAGCAGAGGTGGGAGAACTGAAGGATGACGACTTTGAGAAG	LEAFLTQKQRWEN*RMTTLR	270	122	0		97.4896	107.2	0		0.909418
CTTGAGGCCTTTCTTACCCAGAAGCAGAAAGATGGGAGAACTGAAGGATGACGACTTTGAGA	LEAFLTQKQKDGRTEG*RL*	184	122	0		66.4374	107.2	0		0.619752
CTTGAGGCCTTTCTTACCCAGAAGCAGAGAGAGGTGGGAGAACTGAAGGATGACGACTTTGA	LEAFLTQKQREVGELKDDDF	8	122	0		2.88858	107.2	0		0.0269457
CTTGAGGCCTTTCTTACCCAGAAGCAGAAAGAACTGAAGGATGACGACTTTGAGAAGATCAG	LEAFLTQKQKELKDDDFEKI	51	121	0		18.4147	106.321	0		0.173199
CTTGAGGCCTTTGAGAACTGAAGGATGACGACTTTGAGAAGATCAGTGAGAGATCGGAAGAG	LEAFEN*RMTTLRRSVRDRK	0	121	0		0	106.321	0		0
CTTGAGGCCTTTCTTACCCAGAGGCCTTGCTTCTCCCAGGTGGGAGAACTGAAGGATGACGA	LEAFLTQRPCFSQVGELKDD	0	121	0		0	106.321	0		0
CTTGACGACTTTGAGAAGATCAGTGAGAGATCGGAAGAGCACACGTCTGAACTCCAGTCACC	LDDFEKISERSEEHTSELQS	0	121	0		0	106.321	0		0
CTTGAGGCCTTTCTTACCCAGAAGCAGAAGGTGGGAGAACTGAAGGATGACGGCTTTGAGAA	LEAFLTQKQKVGELKDDGFE	22	120	457		7.9436	105.443	165.616		0.0753358
CTTGAGGCCTTTCTTACCCAGAAAGAACTGAAGGATGACGACTTTGAGAAGATCAGTGAGAG	LEAFLTQKELKDDDFEKISE	448	120	0		161.761	105.443	0		1.53411
CTTGAGGCCTTTCTTACCCAGAAGCAGAGAGAGAACTGAAGGATGACGACTTTGAGAAGATC	LEAFLTQKQREN*RMTTLRR	404	120	0		145.873	105.443	0		1.38344
CTTGAGGCCTTTCTTACCCAGAAGAAACTGGGAGAACTGAAGGATGACGACTTTGAGAAGAT	LEAFLTQKKLGELKDDDFEK	20	120	0		7.22145	105.443	0		0.0684871
CTTGAGGCCTTTCTTACCCAGAAGCAGAGCTGGAGAACTGAAGGATGACGACTTTGAGAAGA	LEAFLTQKQSWRTEG*RL*E	2	120	0		0.722145	105.443	0		0.00684871
CTTGAGGGGAGAACTGAAGGATGACGACTTTGAGAAGATCAGTGAGAGATCGGAAGAGCACA	LEGRTEG*RL*EDQ*EIGRA	0	120	0		0	105.443	0		0
CTTGAGGCCTTTCTTACCCAGAAGCAGAGAACTGGTAGCAGGTGGGAGAACTGAAGGATGAC	LEAFLTQKQRTGSRWEN*RM	0	120	0		0	105.443	0		0
CTTGAGGCCTTTCTTACCCAGAAGCAGGTGGGAGAACTGAAGGATGACGATTTTGAGAAGAT	LEAFLTQKQVGELKDDDFEK	378	119	0		136.485	104.564	0		1.30528
CTTGAGGCCTTTCTTACCCGAAGGATGACGACTTTGAGAAGATCAGTGAGAGATCGGAAGAG	LEAFLTRRMTTLRRSVRDRK	32	119	0		11.5543	104.564	0		0.1105
CTTGAGGCCTTAGGATGACGACTTTGAGAAGATCAGTGAGAGATCGGAAGAGCACACGTCTG	LEALG*RL*EDQ*EIGRAHV	0	119	0		0	104.564	0		0
CTTGAGGCCTTTCTTACCCAGAAGCAGAAGGGAGAACTGAAGGATGACGACTTTGAGAAGAT	LEAFLTQKQKGELKDDDFEK	31	118	1		11.1933	103.685	0.362397		0.107954
CTTGAGGCCTTTCTTACCCAGAAGCAGAGACTGAAGGATGACGACTTTGAGAAGATCAGTGA	LEAFLTQKQRLKDDDFEKIS	179	118	0		64.632	103.685	0		0.623348
CTTGAGGCCTTTCTTACCCAGAAAGAGAACTGAAGGATGACGACTTTGAGAAGATCAGTGAG	LEAFLTQKEN*RMTTLRRSV	13	118	0		4.69394	103.685	0		0.0452711
CTTGAGGCCTTTCCCACCCAGAAGGTGGGAGAACTGAAGGATGACGACTTTGAGAAGATCAG	LEAFPTQKVGELKDDDFEKI	12	118	0		4.33287	103.685	0		0.0417887
CTTGAGGCCTTTCTTACCCAGAGGTAGAAGGTGGGAGAACTAAAGGATGACGACTTTGAGAA	LEAFLTQR*KVGELKDDDFE	157	117	1414		56.6884	102.807	512.43		0.551409
CTTGAGGCCTTACTTACCCAGAAGCAGAAGGTGGGAGAACTGAAGGATGACGACTTTGAGAA	LEALLTQKQKVGELKDDDFE	22	117	655		7.9436	102.807	237.37		0.0772674
CTTGAGGCCTTTCTTACCCAGAACCAGAAGGTGGGAGAACTGAAGGATGACGACTTTGAGAA	LEAFLTQNQKVGELKDDDFE	384	117	62		138.652	102.807	22.4686		1.34867
CTTGAGGCCTTTCTTACCCAGAAGCAGTTCTCCCAGGTGGGAGAACTGAAGGATGACGACTT	LEAFLTQKQFSQVGELKDDD	10515	117	0		3796.68	102.807	0		36.9303
CTTGAGGCCTTTGAACTGAAGGATGACGACTTTGAGAAGATCAGTGAGAGATCGGAAGAGCA	LEAFELKDDDFEKISERSEE	5	117	0		1.80536	102.807	0		0.0175608
CTTGAGGCCTTTCTTACCCAGAAGCAGAACTGGGTAAGAACTGGGTAAGGTGGGAGAACTGA	LEAFLTQKQNWVRTG*GGRT	0	117	0		0	102.807	0		0
CTTGAGGCCTTGGATGACGACTTTGAGAAGATCAGTGAGAGATCGGAAGAGCACACGTCTGA	LEALDDDFEKISERSEEHTS	0	117	0		0	102.807	0		0
CTTGAGGCCTTTCTTACCCAGAGACAGAAGGTGGGAGAACTGAAGGATGACGACTTTGAGAA	LEAFLTQRQKVGELKDDDFE	17	116	407		6.13823	101.928	147.496		0.0602214
CTTGAGGCCTTTCTTACCCAGAAGCAGAAAGGTGGGAGAACTGAAGGATGACAACTTTGAGA	LEAFLTQKQKGGRTEG*QL*	427	116	0		154.178	101.928	0		1.51262
CTTGAGGCCTTTCTTACCCAGAAGGTGGGAGAACTGAAGGATGACGACTTTGAGAAGATCAT	LEAFLTQKVGELKDDDFEKI	296	116	0		106.877	101.928	0		1.04856
CTTGAGGCCTTTCTTACCCAGAAGCACCTGAAGGTGGGAGAACTGAAGGATGACGACTTTGA	LEAFLTQKHLKVGELKDDDF	0	116	0		0	101.928	0		0
CTTGAGGCCTTTCTTACCCAGAAGCAGAAGGTGGGAGAACTGAAGGATTACGACTTTGAGAA	LEAFLTQKQKVGELKDYDFE	13	115	1305		4.69394	101.049	472.929		0.0464521
CTTGAGGCCTTTCTTACCCAGAAGAAGCAGGTGGGAGAACTGAAGGATGACGACTTTGAGAA	LEAFLTQKKQVGELKDDDFE	0	115	12		0	101.049	4.34877		0
CTTGAGGCCTTTCTTACCCAGAAGCAGCTGAAGGATGACGACTTTGAGAAGATCAGTGAGAG	LEAFLTQKQLKDDDFEKISE	908	115	0		327.854	101.049	0		3.2445
CTTGAGGCCTTTCTTACCCAGAAGCAGAAAGGTGAGAGAACTGAAGGATGACGACTTTGAGA	LEAFLTQKQKGERTEG*RL*	538	115	0		194.257	101.049	0		1.9224
CTTGAGGCCTTTCTTACCCAGAAGCAGAAAGGTGGGAGAACTGAAGGATGACGACTTTGGAA	LEAFLTQKQKGGRTEG*RLW	284	115	0		102.545	101.049	0		1.0148
CTTGAGGCCTTTCTTACCCAGAAGCTTCTTACCCAGAAGCAGAACTGAAGGTGGGAGAACTG	LEAFLTQKLLTQKQN*RWEN	0	115	0		0	101.049	0		0
CTTGAGGCCTTGTGGAGAACTGAAGGATGACGACTTTGAGAAGATCAGTGAGAGATCGGAAG	LEALWRTEG*RL*EDQ*EIG	0	114	0		0	100.17	0		0
CTTGAGGCCTTTCTTACCCAGAAGCAGAGAACTGAAGTGGGAGAACTGAAGGATGACGACTT	LEAFLTQKQRTEVGELKDDD	631	113	0		227.837	99.2918	0		2.29462
CTTGAGGCCTTTCTTACCCAGAAGCAGAACTGAAGCAGAACTGAAGGATGACGACTTTGAGA	LEAFLTQKQN*SRTEG*RL*	0	113	0		0	99.2918	0		0
CTTGAGGCCTTTCTTACCCAGAAGCAGGTAAGAGAACTGAAGGATGACGACTTTGAGAAGAT	LEAFLTQKQVRELKDDDFEK	3759	112	0		1357.27	98.4131	0		13.7916
CTTGAGGCCTTTAAGGTGGGAGAACTGAAGGATGACGACTTTGAGAAGATCAGTGAGAGATC	LEAFKVGELKDDDFEKISER	80	112	0		28.8858	98.4131	0		0.293516
CTTGAGGCCTTTCTTACCCAGAAAGAAAGGTGGGAGAACTGAAGGATGACGACTTTGAGAAG	LEAFLTQKERWEN*RMTTLR	7	112	0		2.52751	98.4131	0		0.0256826
CTTGAGGCCTTTCTTAAGCAGGTGGGAGAACTGAAGGATGACGACTTTGAGAAGATCAGTGA	LEAFLKQVGELKDDDFEKIS	2	112	0		0.722145	98.4131	0		0.0073379
CTTGAGGCCTTTCTTACCCAGAAGCAGAGGTGGGAGAACTGAAGGATGACGACTTTGAAAGA	LEAFLTQKQRWEN*RMTTLK	392	111	0		141.54	97.5344	0		1.45119
CTTGAGGCCTTTCTTACCCAGAAGCAGGTGGGAGAACTGAAGGATGATGACTTTGAGAAGAT	LEAFLTQKQVGELKDDDFEK	288	111	0		103.989	97.5344	0		1.06618
CTTGAGGCCTTTCTTACCTTTCTTACCTTTCTTACTTTGAGAAGATCAGTGAGAGATCGGAA	LEAFLTFLTFLTLRRSVRDR	49	111	0		17.6926	97.5344	0		0.181398
CTTGAGGCCTTTCTTACTTTGAGAAGATCAGTGAGAGATCGGAAGAGCACACGTCTGAACTC	LEAFLTLRRSVRDRKSTRLN	36	111	0		12.9986	97.5344	0		0.133272
CTTGAGGCCTTTCTTACCCGAACTGAAGGATGACGACTTTGAGAAGATCAGTGAGAGATCGG	LEAFLTRTEG*RL*EDQ*EI	23	111	0		8.30467	97.5344	0		0.0851461
CTTGAGGCCTTTCTTACCCAGAAGCAGAACTGAAGCAGGTGGGAGAACTGAAGGATGACGAC	LEAFLTQKQN*SRWEN*RMT	18	111	0		6.49931	97.5344	0		0.066636
CTTGAGGCCTTTCTTACCCAGAAGCAGAGGTGGGAGAACTAAAGGATGACGACTTTGAGAAG	LEAFLTQKQRWEN*RMTTLR	629	110	0		227.115	96.6557	0		2.34973
CTTGAGGCCTTTCTTACCCAGAAGGTGGGAGAACTAAAGGATGACGACTTTGAGAAGATCAG	LEAFLTQKVGELKDDDFEKI	451	110	0		162.844	96.6557	0		1.68478
CTTGAGGCCTTTCTTACCCAGAAGGTGGGAGAACTGAAGGATGACGACTTTGAAAGATCAGT	LEAFLTQKVGELKDDDFERS	267	110	0		96.4064	96.6557	0		0.99742
CTTGAGGCCTTTCTTACCCAGAAGCAGAACTGAAGGATGACGACTTTGAGAAATCAGTGAGA	LEAFLTQKQN*RMTTLRNQ*	154	110	0		55.6052	96.6557	0		0.575291
CTTGAGGCCTTTCTTACCCAGAAGCGGAGAACTGAAGGATGACGACTTTGAGAAGATCAGTG	LEAFLTQKRRTEG*RL*EDQ	85	110	0		30.6912	96.6557	0		0.317531
CTTGGGTGGGAGAACTGAAGGATGACGACTTTGAGAAGATCAGTGAGAGATCGGAAGAGCAC	LGWEN*RMTTLRRSVRDRKS	50	110	0		18.0536	96.6557	0		0.186783
CTTGAGGCCTTTCTTCCCCAGAAGCAGAGGTGGGAGAACTGAAGGATGACGACTTTGAGAAG	LEAFLPQKQRWEN*RMTTLR	22	110	0		7.9436	96.6557	0		0.0821845
CTTGAGGCCTTTCTTACCCAGAAGCAGATAAAGGTGGGAGAACTGAAGGATGACGACTTTGA	LEAFLTQKQIKVGELKDDDF	9	110	0		3.24965	96.6557	0		0.0336209
CTTGAGGCCTTTCTTACCCAGAAGAAGTGGGAGAACTGAAGGATGACGACTTTGAGAAGATC	LEAFLTQKKWEN*RMTTLRR	6	110	0		2.16644	96.6557	0		0.0224139
CTTGAGGCCTTTCTTACCCAGAAGCAGGAGAAAGTGGGAGAACTGAAGGATGACGACTTTGA	LEAFLTQKQEKVGELKDDDF	0	110	0		0	96.6557	0		0
CTTGAGGCCTTTCTTACCCAGAAGCAGAAGTTACCCAGAAGGTGGGAGAACTGAAGGATGAC	LEAFLTQKQKLPRRWEN*RM	0	110	0		0	96.6557	0		0
CTTGAGGCCTTGTGGGAGAACTGAAGGATGACGACTTTGAGAAGATCAGTGAGAGATCGGAA	LEALWEN*RMTTLRRSVRDR	0	110	0		0	96.6557	0		0
CTTGAGGCCTTTCTTACCCAGAAGCAGAAGGTGGGAGAACTGATGGATGACGACTTTGAGAA	LEAFLTQKQKVGELMDDDFE	30	109	726		10.8322	95.777	263.101		0.113098
CTTGAGGCCTTTCTTACCCAGAAGCTGAAGGATGGGAGAACTGAAGGATGACGACTTTGAGA	LEAFLTQKLKDGRTEG*RL*	1215	109	0		438.703	95.777	0		4.58046
CTTGAGGCCTTTCTTACCCAGAAGGTGGGAGAACTGAAGGATGACGACTTTGAGAGATCAGT	LEAFLTQKVGELKDDDFERS	324	109	0		116.988	95.777	0		1.22146
CTTGAGGCCTAGAACTGAAGGATGACGACTTTGAGAAGATCAGTGAGAGATCGGAAGAGCAC	LEA*N*RMTTLRRSVRDRKS	135	109	0		48.7448	95.777	0		0.50894
CTTGAGGCCTTTGAGGTGGGAGAACTGAAGGATGACGACTTTGAGAAGATCAGTGAGAGATC	LEAFEVGELKDDDFEKISER	11	109	0		3.9718	95.777	0		0.0414692
CTTGAGGCCTTTCTTACCCAGAAGCAGAACTTACCCAGGTGGGAGAACTGAAGGATGACGAC	LEAFLTQKQNLPRWEN*RMT	7	109	0		2.52751	95.777	0		0.0263895
CTTGAGGCCTTTCTTACCCAGAAGCTTCTGGTAAGAAAGCTTCTTGTGGGAGAACTGAAGGA	LEAFLTQKLLVRKLLVGELK	0	109	0		0	95.777	0		0
CTTGGAGAACTGAAGGATGACGACTTTGAGAAGATCAGTGAGAGATCGGAAGAGCACACGTC	LGELKDDDFEKISERSEEHT	9	108	0		3.24965	94.8983	0		0.0342435
CTTGAGGCCAAGGATGACGACTTTGAGAAGATCAGTGAGAGATCGGAAGAGCACACGTCTGA	LEAKDDDFEKISERSEEHTS	0	108	0		0	94.8983	0		0
CTTGAGGCCCTTCTTACCCAGAAGCAGAGGTGGGAGAACTGAAGGATGACGACTTTGAGAAG	LEALLTQKQRWEN*RMTTLR	345	107	0		124.57	94.0196	0		1.32494
CTTGAGGCCTTTCTTACCCAGAAGCAGGTGGGAGAAATGAAGGATGACGACTTTGAGAAGAT	LEAFLTQKQVGEMKDDDFEK	208	107	0		75.1031	94.0196	0		0.798802
CTTGAGGCCTTTCTTACCCAGAAGCAGTAACTGAAGGATGACGACTTTGAGAAGATCAGTGA	LEAFLTQKQ*LKDDDFEKIS	27	107	0		9.74896	94.0196	0		0.103691
CTTGAGAGAACTGAAGGATGACGACTTTGAGAAGATCAGTGAGAGATCGGAAGAGCACACGT	LERTEG*RL*EDQ*EIGRAH	2	107	0		0.722145	94.0196	0		0.00768079
CTTGAGGCCTTTCTTACCCAGAAGCAGAAATGACGACTTTGAGAAGATCAGTGAGAGATCGG	LEAFLTQKQK*RL*EDQ*EI	0	107	0		0	94.0196	0		0
CTTGAGGCCTTTCTTACCCAGAAGCAGAAGGTGGGAGAACTGAAGGATGACGACTCTGAGAA	LEAFLTQKQKVGELKDDDSE	21	106	342		7.58252	93.141	123.94		0.0814091
CTTGAGGCCTTTCTTACCCAGAAGCAGAAAGGTGGGAGAACTGAAGGATGACGACTTTAAGA	LEAFLTQKQKGGRTEG*RL*	316	106	0		114.099	93.141	0		1.22501
CTTGAGGCCTTTCTTACCCAGAAGCAGAAGGTGGGAGAACTGAAGGATGACGACGTTGAGAA	LEAFLTQKQKVGELKDDDVE	3	105	112		1.08322	92.2623	40.5885		0.0117406
CTTGAGGCCTTTCTTACCCAGAAGCAGGGGTGGGAGAACTGAAGGATGACGACTTTGAGAAG	LEAFLTQKQGWEN*RMTTLR	336	105	1		121.32	92.2623	0.362397		1.31495
CTTGAGGCCTTTCTTACCCAGAAGCAGAAAGGTGGGAGAACTGACGGATGACGACTTTGAGA	LEAFLTQKQKGGRTDG*RL*	291	105	0		105.072	92.2623	0		1.13884
CTTGAGGCCTTTCTTACCCAGAAAGATGACGACTTTGAGAAGATCAGTGAGAGATCGGAAGA	LEAFLTQKDDDFEKISERSE	1	105	0		0.361073	92.2623	0		0.00391355
CTTGAGGCCTTTCTTACCCAGAAGTTCTCTGCTGAAGTTCTCTGAACTGAAGGATGACGACT	LEAFLTQKFSAEVL*TEG*R	0	105	0		0	92.2623	0		0
CTTGAGGCCTTTCTTCCCCAGAAGCAGAAGGTGGGAGAACTGAAGGATGACGCCTTTGAGAA	LEAFLPQKQKVGELKDDAFE	0	104	23		0	91.3836	8.33514		0
CTTGTGGCCTTTCTTACCCAGAAGCAGGTGGGAGAACTGAAGGATGACGACTTTGAGAAGAT	LVAFLTQKQVGELKDDDFEK	226	104	0		81.6024	91.3836	0		0.892966
CTTGAGGCCCTTCTTACCCAGAAGCAGAACTGAAGGATGACGACTTTGAGAAGATCAGTGAG	LEALLTQKQN*RMTTLRRSV	115	104	0		41.5234	91.3836	0		0.454385
CTTGAGGCCTTTCTTACCCAGAAGCAGAACTGTGGGAGAACTGAAGGATGACGACTTTGAGA	LEAFLTQKQNCGRTEG*RL*	40	104	0		14.4429	91.3836	0		0.158047
CTTGAGGCCTTTCTTACCCAGAAGCAGAGAACTGGTGGGAGAACTGAAGGATGACGACTTTG	LEAFLTQKQRTGGRTEG*RL	28	104	0		10.11	91.3836	0		0.110633
CTTGAGGCCTTTCTTACCCCAGAAGGTGGGAGAACTGAAGGATGACGACTTTGAGAAGATCA	LEAFLTPEGGRTEG*RL*ED	0	104	0		0	91.3836	0		0
CTTGAGGCCTTTCTTACCCAGAAGGTGGAGAGAACTGAAGGATGACGACTTTGAGAAGATCA	LEAFLTQKVERTEG*RL*ED	0	104	0		0	91.3836	0		0
CTTGAGGCCTTTCTTACCCAGAAGCAGAAACTGAACTTTCTGCAGGTGGGAGAACTGAAGGA	LEAFLTQKQKLNFLQVGELK	0	104	0		0	91.3836	0		0
CTTGAGGCCTTTCTTACCCAGAGGCAGAGGTGGGAGAACTGAAGGATGACGACTTTGAGAAG	LEAFLTQRQRWEN*RMTTLR	336	103	1		121.32	90.5049	0.362397		1.34048
CTTGTGGCCTTTCTTACCCAGAAGCAGAAAGGTGGGAGAACTGAAGGATGACGACTTTGAGA	LVAFLTQKQKGGRTEG*RL*	262	103	0		94.601	90.5049	0		1.04526
CTTGAGGCCTTTCTTACCCAGAAGAACTGGGAGAACTGAAGGATGACGACTTTGAGAAGATC	LEAFLTQKNWEN*RMTTLRR	0	103	0		0	90.5049	0		0
CTTGAGGCCTGCTTCTGGGTAAGAAAGGTGGGAGAACTGAAGGATGACGACTTTGAGAAGAT	LEACFWVRKVGELKDDDFEK	0	103	0		0	90.5049	0		0
CTTGAGGCCTTTCTTACCCAGAAGCAGGTGGGAGAACTGAAGGATGACAACTTTGAGAAGAT	LEAFLTQKQVGELKDDNFEK	438	102	0		158.15	89.6262	0		1.76455
CTTGAGGCCTTTCTTACCCAGAAGCAGAAAGGTGGGAAAACTGAAGGATGACGACTTTGAGA	LEAFLTQKQKGGKTEG*RL*	393	102	0		141.902	89.6262	0		1.58326
CTTGAGGCCTTTCTTACCCAGAAGCAGAACTGAAGGATGACGACTTTGAGAGATCAGTGAGA	LEAFLTQKQN*RMTTLRDQ*	126	102	0		45.4951	89.6262	0		0.50761
CTTGAGGCCTTTCTTACCCAGAAGCAGTACTGAAGGATGACGACTTTGAGAAGATCAGTGAG	LEAFLTQKQY*RMTTLRRSV	72	102	0		25.9972	89.6262	0		0.290063
CTTGAGGCCTTTCTTACCCAGAAGCAGCAAGGATGACGACTTTGAGAAGATCAGTGAGAGAT	LEAFLTQKQQG*RL*EDQ*E	40	102	0		14.4429	89.6262	0		0.161146
CTTGAGGCCTTTCTTACCAAGAAGCAGAGGTGGGAGAACTGAAGGATGACGACTTTGAGAAG	LEAFLTKKQRWEN*RMTTLR	32	102	0		11.5543	89.6262	0		0.128917
CTTGAGGCCTTTCTGCTTCTGGGTAAGGTGGGAGAACTGAAGGATGACGACTTTGAGAAGAT	LEAFLLLGKVGELKDDDFEK	0	102	0		0	89.6262	0		0
CTTGAGGCCTTTCTTACCCAGAAGCAGAAGGTTGGAGAACTGAAGGATGACGACTTTGAGAA	LEAFLTQKQKVGELKDDDFE	17	101	1564		6.13823	88.7475	566.79		0.0691651
CTTGAGGCCTTTCTTACCCAGAAGCAGAACTGAAGGATGACGACTTTGAGAAGATCATGAGA	LEAFLTQKQN*RMTTLRRS*	127	101	0		45.8562	88.7475	0		0.516704
CTTGAGGCCTTTCTTACCCAGAAGCAGAACTGAGGGATGACGACTTTGAGAAGATCAGTGAG	LEAFLTQKQN*GMTTLRRSV	120	101	0		43.3287	88.7475	0		0.488225
CTTGAGGCCTTTCTTACCCAGAAGCAGTGGGAGAACTGCAGGTGGGAGAACTGAAGGATGAC	LEAFLTQKQWENCRWEN*RM	0	101	0		0	88.7475	0		0
CTTGAGGCCTTTCTTACCCAGAAACTGAAGGATGAACTGAAGGGAGAACTGAAGGATGACGA	LEAFLTQKLKDELKGELKDD	0	101	0		0	88.7475	0		0
CTTGAGGCCTTTCTTACCCAGAAGCAGAAGGTGGGAGAACTGAATGATGACGACTTTGAGAA	LEAFLTQKQKVGELNDDDFE	15	100	586		5.41609	87.8688	212.365		0.0616383
CTTGAGGCCTTTCTTACCCAGAAGCAGGGGGGAGAACTGAAGGATGACGACTTTGAGAAGAT	LEAFLTQKQGGELKDDDFEK	665	100	0		240.113	87.8688	0		2.73263
CTTGAGGCCTTTCTTACCCAGAAGCAGGTGGGAGAACTGAAGGATGACGACTTTGAGAAGTC	LEAFLTQKQVGELKDDDFEK	330	100	0		119.154	87.8688	0		1.35604
CTTGAGGCCTTTCTTACCCAGAAGCTTCTGGTGGGAGAACTGAAGGATGACGACTTTGAGAA	LEAFLTQKLLVGELKDDDFE	14	100	0		5.05502	87.8688	0		0.0575291
CTTGAGGCCTTTCTTACCCAGAAGCCTTTCTTACCCAGTTTCTTACCCAGAAACTGAAGGAT	LEAFLTQKPFLPSFLPRN*R	0	100	0		0	87.8688	0		0
CTTGAGGAGGTGGGAGAACTGAAGGATGACGACTTTGAGAAGATCAGTGAGAGATCGGAAGA	LEEVGELKDDDFEKISERSE	642	99	0		231.809	86.9901	0		2.66477
CTTGAGGCCTTTCTTACCCAGAAGCAGAACTGAAGGATGACGACTTTGAAAGATCAGTGAGA	LEAFLTQKQN*RMTTLKDQ*	141	99	0		50.9112	86.9901	0		0.585253
CTTGAGGCCTTTCTTACCCAGAAGCAGGAACTGAAGGATGACGACTTTGAGAAGATCAGTGA	LEAFLTQKQELKDDDFEKIS	84	99	0		30.3301	86.9901	0		0.348661
CTTGAGGCTGAAGGATGACGACTTTGAGAAGATCAGTGAGAGATCGGAAGAGCACACGTCTG	LEAEG*RL*EDQ*EIGRAHV	49	99	0		17.6926	86.9901	0		0.203386
CTTGAGGCCTTTCTTACCCAGAAGCAGAAAGGTGGGAGAACTGAAGGATGACGATTTTGAGA	LEAFLTQKQKGGRTEG*RF*	378	98	0		136.485	86.1115	0		1.58499
CTTGAGGCCTTTCTTACCCAGAAGCAGAAAGGTGGGAGAACTGAAGGATGAAGACTTTGAGA	LEAFLTQKQKGGRTEG*RL*	211	98	0		76.1863	86.1115	0		0.884741
CTTGAGGCCTTTCTTACCCAGAAGCACGACTTTGAGAAGATCAGTGAGAGATCGGAAGAGCA	LEAFLTQKHDFEKISERSEE	32	98	0		11.5543	86.1115	0		0.134179
CTTGGATGACGACTTTGAGAAGATCAGTGAGAGATCGGAAGAGCACACGTCTGAACTCCAGT	LG*RL*EDQ*EIGRAHV*TP	19	98	0		6.86038	86.1115	0		0.0796686
CTTGAGGCCTTTCTTACCCAGAAGCAGAGAACTTCAGGTGGGAGAACTGAAGGATGACGACT	LEAFLTQKQRTSGGRTEG*R	11	98	0		3.9718	86.1115	0		0.0461239
CTTGAGGCCTTTCTTACCCAGAAGCTTCTCCCAAGTTCTCCCAAGTGGGAGAACTGAAGGAT	LEAFLTQKLLPSSPKWEN*R	0	98	0		0	86.1115	0		0
CTTGAGGCCTTTCTTACCCAGAAGCAGAAAGAGAACTGAAGGATGACGACTTTGAGAAGATC	LEAFLTQKQKEN*RMTTLRR	0	98	0		0	86.1115	0		0
CTTGAGGCCTTTCTTACCCAGAAGCAGAAAGAACTGAGAAGACTTTGAGAAGATCAGTGAGA	LEAFLTQKQKELRRL*EDQ*	0	98	0		0	86.1115	0		0
CTTGAGGCCTTTCTTACCCAGAAGCAAGAAGAGAACTGAAGGATGACGACTTTGAGAAGATC	LEAFLTQKQEEN*RMTTLRR	0	98	0		0	86.1115	0		0
CTTGAGGCCTTTGGAGAACTGAAGGATGACGACTTTGAGAAGATCAGTGAGAGATCGGAAGA	LEAFGELKDDDFEKISERSE	223	97	0		80.5192	85.2328	0		0.944698
CTTGAGGCCTTTCTTACCCAGAAAGGGAGAACTGAAGGATGACGACTTTGAGAAGATCAGTG	LEAFLTQKGRTEG*RL*EDQ	49	97	0		17.6926	85.2328	0		0.207579
CTTGAGGCCTTTCTTCCCCAGAAGCAGAACTGAAGGATGACGACTTTGAGAAGATCAGTGAG	LEAFLPQKQN*RMTTLRRSV	10	97	0		3.61073	85.2328	0		0.0423631
CTTGAGGCCTTTCTTACCCAGAAGCAGAACTGAAGGATGAACTGAAGGATGACGACTTTGAG	LEAFLTQKQN*RMN*RMTTL	1	97	0		0.361073	85.2328	0		0.00423631
CTTGAGGCCTTTCTTACCCAGAGGTAGAAGGTGGGAGAACTGAAGGATGACGACTTTGAGAA	LEAFLTQR*KVGELKDDDFE	46	96	1365		16.6093	84.3541	494.673		0.1969
CTTGAGACCTTTCTTACCCAGAAGCAGGTGGGAGAACTGAAGGATGACGACTTTGAGAAGAT	LETFLTQKQVGELKDDDFEK	262	95	0		94.601	83.4754	0		1.13328
CTTGAGGCCTTTCTTACACAGAAGCAGGTGGGAGAACTGAAGGATGACGACTTTGAGAAGAT	LEAFLTQKQVGELKDDDFEK	114	95	0		41.1623	83.4754	0		0.493107
CTTGAGGCCTTTCTTACCCAGAAAGGAGAACTGAAGGATGACGACTTTGAGAAGATCAGTGA	LEAFLTQKGELKDDDFEKIS	32	95	0		11.5543	83.4754	0		0.138416
CTTGAGGCCTTTCTTACCCAGAAGCAGAAAGTTCAGGTGGGAGAACTGAAGGATGACGACTT	LEAFLTQKQKVQVGELKDDD	0	95	0		0	83.4754	0		0
CTTGAGGCCTTTCTTACCCACCTGGGTGGGAGAACTGAAGGATGACGACTTTGAGAAGATCA	LEAFLTHLGGRTEG*RL*ED	0	95	0		0	83.4754	0		0
CTTGAGGCCTTTCTTACCCAGAAGCAGAAGGTGGGAGAACTGAAGGATGACGACTTTTAGAA	LEAFLTQKQKVGELKDDDF*	22	94	837		7.9436	82.5967	303.327		0.0961733
CTTGAGGCCTTTCTTACCCAGAAGCAGAAAGGTGGGAGAACTGAAGAATGACGACTTTGAGA	LEAFLTQKQKGGRTEE*RL*	337	94	0		121.681	82.5967	0		1.4732
CTTGAGGCCTTTCTTACCCAGAAGCAGGTGAGAGAACTGAAGGATGACGACTTTGAGAAGAT	LEAFLTQKQVRELKDDDFEK	314	94	0		113.377	82.5967	0		1.37266
CTTGAGGCCTTTCTTACCCAGAAGCAGGTGGGAGAACTGAAGGATGACGACTTTAAGAAGAT	LEAFLTQKQVGELKDDDFKK	303	94	0		109.405	82.5967	0		1.32457
CTTGAGGCCTTTCTTACCCAGAAGTAGAAAGGTGGGAGAACTGAAGGATGACGACTTTGAGA	LEAFLTQK*KGGRTEG*RL*	292	94	0		105.433	82.5967	0		1.27648
CTTGAGGCCTTTCTTACCCAGAAGCAGAAAGGTGGGAGAACTGAAGGATTACGACTTTGAGA	LEAFLTQKQKGGRTEGLRL*	178	94	0		64.2709	82.5967	0		0.778129
CTTGAGGCCTTTCTTACCCAGCTGAGAACTGAAGGATGACGACTTTGAGAAGATCAGTGAGA	LEAFLTQLRTEG*RL*EDQ*	0	94	0		0	82.5967	0		0
CTTGAGGCCTTTCTTACCCAGAAGCAGAGAACTGCTTACCCAGGTGGGAGAACTGAAGGATG	LEAFLTQKQRTAYPGGRTEG	0	94	0		0	82.5967	0		0
CTTGAGGCCTTTCTTACCCAGAAGCAGAAAAGTGGGAGAACTGAAGGATGACGACTTTGAGA	LEAFLTQKQKSGRTEG*RL*	217	93	0		78.3528	81.718	0		0.958819
CTTGAGGCCTTTCTTACCCAGAAGCAGAGAACCAGGTGGGAGAACTGAAGGATGACGACTTT	LEAFLTQKQRTRWEN*RMTT	70	93	0		25.2751	81.718	0		0.309296
CTTGAGGCCTTTCTTACCCAGAAGCAGAAAGAGAGAACTGAAGGATGACGACTTTGAGAAGA	LEAFLTQKQKERTEG*RL*E	0	93	0		0	81.718	0		0
CTTGAGGCCTTTCTGAACTGAAGGATGACGACTTTGAGAAGATCAGTGAGAGATCGGAAGAG	LEAFLN*RMTTLRRSVRDRK	0	93	0		0	81.718	0		0
CTTGAGGCCTTTCTTACCAAGAAGAAGAAGGTGGGAGAACTGAAGGATGACGACTTTGAGAA	LEAFLTKKKKVGELKDDDFE	0	92	32		0	80.8393	11.5967		0
CTTGAGGCCTTTCTTACCCAGAAGCAGAGAGTGGGAGAACTGAAGGATGACGACTTTGAGAA	LEAFLTQKQRVGELKDDDFE	0	92	13		0	80.8393	4.71117		0
CTTGAGGCCTTTCTTACCCAGAAGCAGAGGTGGGAGAACTGAAGGACGACGACTTTGAGAAG	LEAFLTQKQRWEN*RTTTLR	231	92	1		83.4078	80.8393	0.362397		1.03177
CTTGAGGCCTTTCTTACCCAGAAGCAGAAAGGTGGGAGAACTGAAGGATGACGACCTTGAGA	LEAFLTQKQKGGRTEG*RP*	429	92	0		154.9	80.8393	0		1.91615
CTTGAGGCCTTTCTTACTCAGAAGCAGAAAGGTGGGAGAACTGAAGGATGACGACTTTGAGA	LEAFLTQKQKGGRTEG*RL*	349	92	0		126.014	80.8393	0		1.55882
CTTGAGGCCTTTCTTACCCAGAAGCAGAAAGGTGGGAGAACTGAAGGATGATGACTTTGAGA	LEAFLTQKQKGGRTEG**L*	346	92	0		124.931	80.8393	0		1.54543
CTTGAGGCCTTTCTTACCCAGAAGCAGAAAGGTAGGAGAACTGAAGGATGACGACTTTGAGA	LEAFLTQKQKGRRTEG*RL*	286	92	0		103.267	80.8393	0		1.27743
CTTGAGGCCTTTCTTACCCAGAAGCAGGTGGGAGCACTGAAGGATGACGACTTTGAGAAGAT	LEAFLTQKQVGALKDDDFEK	235	92	0		84.8521	80.8393	0		1.04964
CTTGAGGCCTTTCAGCAGGTGGGAGAACTGAAGGATGACGACTTTGAGAAGATCAGTGAGAG	LEAFQQVGELKDDDFEKISE	6	92	0		2.16644	80.8393	0		0.0267993
CTTGAGGCCTTTCAAGGATGACGACTTTGAGAAGATCAGTGAGAGATCGGAAGAGCACACGT	LEAFQG*RL*EDQ*EIGRAH	5	92	0		1.80536	80.8393	0		0.0223327
CTTGAGGCCTTTCTTACCCAGAAGCAGTGGTGGGAGAACTGAAGGATGACGACTTTGAGAAG	LEAFLTQKQWWEN*RMTTLR	89	91	0		32.1355	79.9606	0		0.401891
CTTGAGGCCTTTCTTACCCAGAAGACGACTTTGAGAAGATCAGTGAGAGATCGGAAGAGCAC	LEAFLTQKTTLRRSVRDRKS	7	91	0		2.52751	79.9606	0		0.0316094
CTTGAGGCCTTTCTTAGAAGGTGGGAGAACTGAAGGATGACGACTTTGAGAAGATCAGTGAG	LEAFLRRWEN*RMTTLRRSV	0	91	0		0	79.9606	0		0
CTTGAGGCCTTTCTTACCCAGAAGCAGAACCCAGAAGGTGGGAGAACTGAAGGATGACGACT	LEAFLTQKQNPEGGRTEG*R	0	91	0		0	79.9606	0		0
CTTGAGGCCTTTCTGGGATGACGACTTTGAGAAGATCAGTGAGAGATCGGAAGAGCACACGT	LEAFLG*RL*EDQ*EIGRAH	0	91	0		0	79.9606	0		0
CTTGAGGCAACTGAAGGATGACGACTTTGAGAAGATCAGTGAGAGATCGGAAGAGCACACGT	LEATEG*RL*EDQ*EIGRAH	0	91	0		0	79.9606	0		0
CTTGAGGCCTTTCTTACCCAGAAGGTGGGAGAACTGAAGGATGACGACTTTGAGAAGACAGT	LEAFLTQKVGELKDDDFEKT	193	90	0		69.687	79.0819	0		0.8812
CATGAGGCCTTTCTTACCCAGAAGCAGAAGGTGGGAGAACTGAAGGATGACGACTTTGAGAA	HEAFLTQKQKVGELKDDDFE	19	89	557		6.86038	78.2033	201.855		0.087725
CTTGAGGCCTTTCTTACCCAGAAGCAGAACTGGAGAACTGAAGGATGACGACTTTGAGAAGA	LEAFLTQKQNWRTEG*RL*E	492	89	0		177.648	78.2033	0		2.27162
CTTGAGGCCTTTCTTACCCAGAAGCAGTGGAGAACTGAAGGATGACGACTTTGAGAAGATCA	LEAFLTQKQWRTEG*RL*ED	193	89	0		69.687	78.2033	0		0.891101
CTTGAGGCCTTTCTGCTTCTAGGTGGGAGAACTGAAGGATGACGACTTTGAGAAGATCAGTG	LEAFLLLGGRTEG*RL*EDQ	1	89	0		0.361073	78.2033	0		0.0046171
CTTGAGGCCGAAGGATGACGACTTTGAGAAGATCAGTGAGAGATCGGAAGAGCACACGTCTG	LEAEG*RL*EDQ*EIGRAHV	0	89	0		0	78.2033	0		0
CTTGAGGCCTTTCTTACCCAGAAGTTACCCAGGTGGGAGAACTGAAGGATGACGACTTTGAG	LEAFLTQKLPRWEN*RMTTL	6	88	2		2.16644	77.3246	0.724795		0.0280174
CTTGAGGCCTTTCTTACCCAGAAGCAGAACTTCAGGTGGGAGAACTGAAGGATGACGACTTT	LEAFLTQKQNFRWEN*RMTT	1588	88	0		573.383	77.3246	0		7.41528
CTTGAGGCCTTTCTTACCCAGAAGCAGAACTAAAGGATGACGACTTTGAGAAGATCAGTGAG	LEAFLTQKQN*RMTTLRRSV	97	88	0		35.024	77.3246	0		0.452948
CTTGAGGCCTTTCTTACCCAGAAGTGAAGGATGACGACTTTGAGAAGATCAGTGAGAGATCG	LEAFLTQK*RMTTLRRSVRD	71	88	0		25.6362	77.3246	0		0.33154
CTTGAGGCCTTTCTTCCCCAGAAGGTGGGAGAACTGAAGGATGACGACTTTGAGAAGATCAG	LEAFLPQKVGELKDDDFEKI	26	88	0		9.38789	77.3246	0		0.121409
CTTGAGGCCTTTCACTGAAGGATGACGACTTTGAGAAGATCAGTGAGAGATCGGAAGAGCAC	LEAFH*RMTTLRRSVRDRKS	15	88	0		5.41609	77.3246	0		0.0700436
CTTGAGGCCTTTCTTACCCAGAAGCAGTAAGTAAGGTGGGAGAACTGAAGGATGACGACTTT	LEAFLTQKQ*VRWEN*RMTT	1	88	0		0.361073	77.3246	0		0.00466957
CTTGAGGCCTTTCTTACCCAGAAGCACTTGTGCTCCCCACTTTGGAACAGGACCAACTTGGA	LEAFLTQKHLCSPLWNRTNL	0	88	0		0	77.3246	0		0
CTTGAGGCCTTTCTTACCAAGGATGACGACTTTGAGAAGATCAGTGAGAGATCGGAAGAGCA	LEAFLTKDDDFEKISERSEE	0	88	0		0	77.3246	0		0
CTAGAGGCCTTTCTTACCCAGAAGCAGAAGGTGGGAGAACTGAAGGATGACGACTTTGAGAA	LEAFLTQKQKVGELKDDDFE	21	87	407		7.58252	76.4459	147.496		0.0991881
CTTGAGGCCTTTCTAACCCAGAAGCAGAAGGTGGGAGAACTGAAGGATGACGACTTTGAGAA	LEAFLTQKQKVGELKDDDFE	4	87	203		1.44429	76.4459	73.5667		0.018893
CTTGAGGCCTTTCTTACTCAGAAGCAGGTGGGAGAACTGAAGGATGACGACTTTGAGAAGAT	LEAFLTQKQVGELKDDDFEK	397	87	0		143.346	76.4459	0		1.87513
CTTGAGGCCTTTCTTACCCAGAAGGTGGGGGAACTGAAGGATGACGACTTTGAGAAGATCAG	LEAFLTQKVGELKDDDFEKI	205	87	0		74.0199	76.4459	0		0.968265
CTTGAGGCCTTTCTTACCCAGTTCTCCAGATGGGAGAACTGAAGGATGACGACTTTGAGAAG	LEAFLTQFSRWEN*RMTTLR	51	87	0		18.4147	76.4459	0		0.240885
CTTGAGGCCTTTCTTACCCAGAAGCTGAAGGAGAACTGAAGGATGACGACTTTGAGAAGATC	LEAFLTQKLKEN*RMTTLRR	28	87	0		10.11	76.4459	0		0.132251
CTTGAGGCCTTTCTTACCCAGAAGCAGAGAACTGAAGTGTGGAGAGAACTGAAGGATGACGA	LEAFLTQKQRTEVWRELKDD	0	87	0		0	76.4459	0		0
CTTGAGGCCTTTCTGGATGACGACTTTGAGAAGATCAGTGAGAGATCGGAAGAGCACACGTC	LEAFLDDDFEKISERSEEHT	0	87	0		0	76.4459	0		0
CTTGAGGCCTTTCTTACCCAGAAGCAGGTGGGAGAACTGAAGGATAACGACTTTGAGAAGAT	LEAFLTQKQVGELKDNDFEK	387	86	0		139.735	75.5672	0		1.84915
CTTGAGGCTTTTCTTACCCAGAAGCAGAAAGGTGGGAGAACTGAAGGATGACGACTTTGAGA	LEAFLTQKQKGGRTEG*RL*	229	86	0		82.6856	75.5672	0		1.0942
CTTGAGGCCTTTCTTACCCAGAAGCAGGTGGGAGAACTGAAGGATGACGACTTTGAGAAAAT	LEAFLTQKQVGELKDDDFEK	227	86	0		81.9635	75.5672	0		1.08464
CTTGAGGCCTTTCTTACCCAGAAGCAGGTAAGGTGGGAGAACTGAAGGATGACGACTTTGAG	LEAFLTQKQVRWEN*RMTTL	60	86	0		21.6644	75.5672	0		0.28669
CTTGAGGCCTTTCTTACCCAGAAAGCAGGTGGGAGAACTGAAGGATGACGACTTTGAGAAGA	LEAFLTQKAGGRTEG*RL*E	56	86	0		20.2201	75.5672	0		0.267577
CTTGAGGCCTAAGGATGACGACTTTGAGAAGATCAGTGAGAGATCGGAAGAGCACACGTCTG	LEA*G*RL*EDQ*EIGRAHV	30	86	0		10.8322	75.5672	0		0.143345
CTTGAGGCCTTTCTTACCCAGAAGCAAGAACTGAAGGATGACGACTTTGAGAAGATCAGTGA	LEAFLTQKQELKDDDFEKIS	27	86	0		9.74896	75.5672	0		0.12901
CTTGAGGCCTTTCTTACCCAGAAGCAGAACAGGTGGGAGAACTGAAGGATGACGACTTTGAG	LEAFLTQKQNRWEN*RMTTL	20	86	0		7.22145	75.5672	0		0.0955633
CTTGAGGCCTTTCTTACCCAGAAGCAGGATGGGAGAACTGAAGGATGACGACTTTGAGAAGA	LEAFLTQKQDGRTEG*RL*E	8	86	0		2.88858	75.5672	0		0.0382253
CTTGAGGCAGAACTGAAGGATGACGACTTTGAGAAGATCAGTGAGAGATCGGAAGAGCACAC	LEAELKDDDFEKISERSEEH	1	86	0		0.361073	75.5672	0		0.00477817
CTTGAGGCCAACTGAAGGATGACGACTTTGAGAAGATCAGTGAGAGATCGGAAGAGCACACG	LEAN*RMTTLRRSVRDRKST	0	86	0		0	75.5672	0		0
CTTGAGGCCTTTCTTACCCAGAAGCAGAGGTGGGAGAACCGAAGGATGACGACTTTGAGAAG	LEAFLTQKQRWENRRMTTLR	272	85	0		98.2118	74.6885	0		1.31495
CTTGAGGCCTTTCTTACCCAGAAGCAGAGATGGGAGAACTGAAGGATGACGACTTTGAGAAG	LEAFLTQKQRWEN*RMTTLR	142	85	0		51.2723	74.6885	0		0.686482
CTTGAGGCCTTGAGGCCTTTCTTACCCAGAAGCAGAGAACTGAAGGATGACGACTTTGAGAA	LEALRPFLPRSRELKDDDFE	20	85	0		7.22145	74.6885	0		0.0966876
CTTGAGGCCTTTCAGGATGACGACTTTGAGAAGATCAGTGAGAGATCGGAAGAGCACACGTC	LEAFQDDDFEKISERSEEHT	9	85	0		3.24965	74.6885	0		0.0435094
CTTGAGGCCTTTCTTACCCAGAAGCAGGGTAACTGAAGGATGACGACTTTGAGAAGATCAGT	LEAFLTQKQGN*RMTTLRRS	8	85	0		2.88858	74.6885	0		0.038675
CTTGAGGCCTTTCTTACCCAGAAGCAGAACAGAACTGAAGGATGACGACTTTGAGAAGATCA	LEAFLTQKQNRTEG*RL*ED	0	85	0		0	74.6885	0		0
CTTGAGGCCTTTCTTACCCAGAAGCAGAAGGTGGGAGAACTGAAGGATGACGACTTTGCGAA	LEAFLTQKQKVGELKDDDFA	30	84	589		10.8322	73.8098	213.452		0.146758
CTTGAGGCCTTTCTTACCCAGAAACAGAAAGGTGGGAGAACTGAAGGATGACGACTTTGAGA	LEAFLTQKQKGGRTEG*RL*	275	84	0		99.295	73.8098	0		1.34528
CTTGAGGCCTTTCTTACCCAGAAGCAGAGAGAAGGTGGGAGAACTGAAGGATGACGACTTTG	LEAFLTQKQREGGRTEG*RL	42	84	0		15.165	73.8098	0		0.205461
CTTGAGGCCTTTCCTTGAGGTGGGAGAACTGAAGGATGACGACTTTGAGAAGATCAGTGAGA	LEAFP*GGRTEG*RL*EDQ*	0	84	0		0	73.8098	0		0
CTTGAGGCCTTTCTTACCCAGAAGCAGAAGGTGGGAGAACTGAAGGATGACGACTGTGAGAA	LEAFLTQKQKVGELKDDDCE	5	83	260		1.80536	72.9311	94.2233		0.0247544
CTTGAGGCCTTTCTTACCCAGGAGGGAGAACTGAAGGATGACGACTTTGAGAAGATCAGTGA	LEAFLTQEGELKDDDFEKIS	1008	83	0		363.961	72.9311	0		4.99048
TTTGAGGCCTTTCTTACCCAGAAGCAGGTGGGAGAACTGAAGGATGACGACTTTGAGAAGAT	FEAFLTQKQVGELKDDDFEK	201	83	0		72.5756	72.9311	0		0.995125
CTTGAGGCCTTTCTTACCCAGAAGCAGAGTAAGGTGGGAGAACTGAAGGATGACGACTTTGA	LEAFLTQKQSKVGELKDDDF	28	83	0		10.11	72.9311	0		0.138624
CTTGAGGCCTTTCTTACCCAGAAGCCTCAGGAGAACTGAAGGATGACGACTTTGAGAAGATC	LEAFLTQKPQEN*RMTTLRR	0	83	0		0	72.9311	0		0
CTTGAGGCCTTTCTTACCCAGAAGCACTTTCTTCAACAGTAGAAATCCTCATTTGGATGACG	LEAFLTQKHFLQQ*KSSFG*	0	83	0		0	72.9311	0		0
CTTGAGGCCTTTCTACCCAGAAGCAGAAGGTGGGAGAACTGAAGGATGACGACTTTGAGAAG	LEAFLPRSRRWEN*RMTTLR	20	82	391		7.22145	72.0524	141.697		0.100225
CTTGAGGCCTTTCTTACCCAGAAGCAGAGGTGGGAGGACTGAAGGATGACGACTTTGAGAAG	LEAFLTQKQRWED*RMTTLR	237	82	2		85.5742	72.0524	0.724795		1.18767
CTTGAGGCCTTTCTTACCCAGAAGAAAGAAGGTGGGAGAACTGAAGGATGACGACTTTGAGA	LEAFLTQKKEGGRTEG*RL*	369	82	0		133.236	72.0524	0		1.84915
CTTGAGGCCTTTCTTACCCAGAAGCAGAGGTGGGAGAACTGAGGGATGACGACTTTGAGAAG	LEAFLTQKQRWEN*GMTTLR	338	82	0		122.043	72.0524	0		1.6938
CTTGAGGCCTTTCTTACCCAGAAGCAGAAAGGTGGGCGAACTGAAGGATGACGACTTTGAGA	LEAFLTQKQKGGRTEG*RL*	303	82	0		109.405	72.0524	0		1.51841
CTTGAGGCCTTTCTTACCCAGAAGCAGTTCTCCCAGAAGGTGGGAGAACTGAAGGATGACGA	LEAFLTQKQFSQKVGELKDD	222	82	0		80.1581	72.0524	0		1.1125
CTTGAGGCCTTTCTTACCCAGAAGCAGAGAGTTCTTACCACTTCAGGTGGGAGAACTGAAGG	LEAFLTQKQRVLTTSGGRTE	0	82	0		0	72.0524	0		0
CTTGAGGCCTTTCTTACCCAGAAGCAGAAGGTGGTAGAACTGAAGGATGACGACTTTGAGAA	LEAFLTQKQKVVELKDDDFE	36	81	642		12.9986	71.1738	232.659		0.182632
CTTGAGGCCTTTCTTACCCAGATGCAGAAGGTGGGAGAACTGAAGGATGACGACTTTGAGAA	LEAFLTQMQKVGELKDDDFE	16	81	453		5.77716	71.1738	164.166		0.0811698
CTTGAGGCCTTTCTTACCCAGAAGCAGAAGGTGGGAGAACTGAACGATGACGACTTTGAGAA	LEAFLTQKQKVGELNDDDFE	5	81	164		1.80536	71.1738	59.4332		0.0253656
CTTGAGGCCTTTCTTACCCAGAAGCAGAGGTGGGAGAACTGAAGGATGACGACTTGAGAAGA	LEAFLTQKQRWEN*RMTT*E	294	81	2		106.155	71.1738	0.724795		1.4915
CTTGAGGCCTTTCTTACCCAGTTCTCCCAGGTGGGAGAACTGAAGGATGACGACTTTGAGAA	LEAFLTQFSQVGELKDDDFE	113	81	0		40.8012	71.1738	0		0.573262
CTTGAGGCCTTTCTTACCCAGAAGCAGGACTGAAGGATGACGACTTTGAGAAGATCAGTGAG	LEAFLTQKQD*RMTTLRRSV	112	81	0		40.4401	71.1738	0		0.568189
CTTGAGGCCTTCCTTACCCAGAAGCAGAACTGAAGGATGACGACTTTGAGAAGATCAGTGAG	LEAFLTQKQN*RMTTLRRSV	99	81	0		35.7462	71.1738	0		0.502238
CTTGAGGCCTTTCTTACCCAGAAGCAGAACTTCTGAAGGATGACGACTTTGAGAAGATCAGT	LEAFLTQKQNF*RMTTLRRS	8	81	0		2.88858	71.1738	0		0.0405849
CTTGAGGCCTTTCTTACCCAGAAGCCTGGGTAGAACTGAAGGATGACGACTTTGAGAAGATC	LEAFLTQKPG*N*RMTTLRR	0	81	0		0	71.1738	0		0
CTTGAGGCCTTTCTTACCCAGAAGCAGAGAAAGGATGACGACTTTGAGAAGATCAGTGAGAG	LEAFLTQKQRKDDDFEKISE	0	81	0		0	71.1738	0		0
CTTGAGGCCTTTCTTACCCAGAAGCAATGTGGGAGAACTGAAGGATGACGACTTTGAGAAGA	LEAFLTQKQCGRTEG*RL*E	0	81	0		0	71.1738	0		0
CTTGAGGCCTTTCTTACCCAGAAGCAAGTAAGAAAGGATGACGACTTTGAGAAGATCAGTGA	LEAFLTQKQVRKDDDFEKIS	0	81	0		0	71.1738	0		0
CTTGAGGCCTTTCTTACCCAGAAGCAGAAGGTGGGAGAACTGAAGGATGACTACTTTGAGAA	LEAFLTQKQKVGELKDDYFE	28	80	679		10.11	70.2951	246.068		0.143823
CTTGAGGCTTTTCTTACCCAGAAGCAGGTGGGAGAACTGAAGGATGACGACTTTGAGAAGAT	LEAFLTQKQVGELKDDDFEK	212	80	0		76.5474	70.2951	0		1.08894
CTTGAGTGGGAGAACTGAAGGATGACGACTTTGAGAAGATCAGTGAGAGATCGGAAGAGCAC	LEWEN*RMTTLRRSVRDRKS	108	80	0		38.9958	70.2951	0		0.554745
CTTGAGGCCTTTCTTACCCAGAAGACTTTGAGAAGATCAGTGAGAGATCGGAAGAGCACACG	LEAFLTQKTLRRSVRDRKST	0	80	0		0	70.2951	0		0
CTTGATGCCTTTCTTACCCAGAAGCAGAAGGTGGGAGAACTGAAGGATGACGACTTTGAGAA	LDAFLTQKQKVGELKDDDFE	4	79	835		1.44429	69.4164	302.602		0.0208062
CTTGAGGCCTTTCTTACCCAGAAGCAGAAGGTGGGAGAACTGAAGTATGACGACTTTGAGAA	LEAFLTQKQKVGELKYDDFE	17	79	726		6.13823	69.4164	263.101		0.0884263
CTTGAGGCCTTTCTTACCCAGAAGCGGAGGTGGGAGAACTGAAGGATGACGACTTTGAGAAG	LEAFLTQKRRWEN*RMTTLR	258	79	0		93.1567	69.4164	0		1.342
CTTGAGGCCTTTCTTACCCAGAAGCAGAGAACTGAAGGATGACGACTTTGAGAAGATCAGAG	LEAFLTQKQRTEG*RL*EDQ	171	79	0		61.7434	69.4164	0		0.889465
CTTGAGGCCTTTCTTACCCAGAGGCAGAACTGAAGGATGACGACTTTGAGAAGATCAGTGAG	LEAFLTQRQN*RMTTLRRSV	127	79	0		45.8562	69.4164	0		0.660597
CTTGAGGCCTTTCTTACCCAGAAGAAGAGGTGGGAGAACTGAAGGATGACGACTTTGAGAAG	LEAFLTQKKRWEN*RMTTLR	105	79	0		37.9126	69.4164	0		0.546163
CTTGAGGCCTTTCTTAAGAACTGAAGGATGACGACTTTGAGAAGATCAGTGAGAGATCGGAA	LEAFLKN*RMTTLRRSVRDR	89	79	0		32.1355	69.4164	0		0.462938
CTTGAGGCCTTTCTTACCCACCTAAGGTGGGAGAACTGAAGGATGACGACTTTGAGAAGATC	LEAFLTHLRWEN*RMTTLRR	4	79	0		1.44429	69.4164	0		0.0208062
CTTGAGGCCTTTCTTACCCAGAAGGCCTTTCTTACCCAGGTGGGAGAACTGAAGGATGACGA	LEAFLTQKAFLTQVGELKDD	0	79	0		0	69.4164	0		0
CTTGAGGCCTTTCTTACCCAGAAGCAGAAGGTGGGAGAACTGAAGGATGACGATTTGAGAAG	LEAFLTQKQKVGELKDDDLR	39	78	301		14.0818	68.5377	109.082		0.205461
CTTGAGGCCTTTCTTACCCAGAAGCAGAAAGGTGGGAGAACTGAAGGATGACGACATTGAGA	LEAFLTQKQKGGRTEG*RH*	366	78	0		132.153	68.5377	0		1.92817
CTTGAGGCCTTTCTTACCCAGAAGCAGGTGGGAGAACTGAAGGATGACGACTTTGAAAAGAT	LEAFLTQKQVGELKDDDFEK	295	78	0		106.516	68.5377	0		1.55413
CTTGAGGCCTTTCTTACCCAGAAGCAGGTGGGAGAACTGAAGGATGACGACTTTGGAAGATC	LEAFLTQKQVGELKDDDFGR	280	78	0		101.1	68.5377	0		1.47511
CTTGAAGCCTTTCTTACCCAGAAGCAGAAAGGTGGGAGAACTGAAGGATGACGACTTTGAGA	LEAFLTQKQKGGRTEG*RL*	246	78	0		88.8239	68.5377	0		1.29599
CTTGAGGCCTTTCTTACCCAGAAAAGGTGGGAGAACTGAAGGATGACGACTTTGAGAAGATC	LEAFLTQKRWEN*RMTTLRR	230	78	0		83.0467	68.5377	0		1.21169
CTTGAGGCCTTTCTTACCAAGAAGGTGGGAGAACTGAAGGATGACGACTTTGAGAAGATCAG	LEAFLTKKVGELKDDDFEKI	33	78	0		11.9154	68.5377	0		0.173852
CTTGAGGCCTTTCTTACCCCTGAAGGATGACGACTTTGAGAAGATCAGTGAGAGATCGGAAG	LEAFLTPEG*RL*EDQ*EIG	3	78	0		1.08322	68.5377	0		0.0158047
CTTTAGGCCTTTCTTACCCAGAAGCAGAAGGTGGGAGAACTGAAGGATGACGACTTTGAGAA	L*AFLTQKQKVGELKDDDFE	18	77	573		6.49931	67.659	207.654		0.0960598
CTTGAGGCCTTTCTTACCCAGAAGCAGAAAGGTGGAAGAACTGAAGGATGACGACTTTGAGA	LEAFLTQKQKGGRTEG*RL*	281	77	0		101.461	67.659	0		1.4996
CTTGAGGCGGGAGAACTGAAGGATGACGACTTTGAGAAGATCAGTGAGAGATCGGAAGAGCA	LEAGELKDDDFEKISERSEE	64	77	0		23.1086	67.659	0		0.341546
CCTGAGGCCTTTCTTACCCAGAAGCAGAACTGAAGGATGACGACTTTGAGAAGATCAGTGAG	PEAFLTQKQN*RMTTLRRSV	61	77	0		22.0254	67.659	0		0.325536
CTTGAGGCCTAACTGAAGGATGACGACTTTGAGAAGATCAGTGAGAGATCGGAAGAGCACAC	LEA*LKDDDFEKISERSEEH	23	77	0		8.30467	67.659	0		0.122743
CTTGAGGCCTTTCTTACCAAGAAGCAGAACTGAAGGATGACGACTTTGAGAAGATCAGTGAG	LEAFLTKKQN*RMTTLRRSV	10	77	0		3.61073	67.659	0		0.0533665
CTTGAGGCCTTTCTTACCCAGAAGCAGAACTTGTGGGAGAACTGAAGGATGACGACTTTGAG	LEAFLTQKQNLWEN*RMTTL	3	77	0		1.08322	67.659	0		0.01601
GTTGAGGCCTTTCTTACCCAGAAGCAGAAGGTGGGAGAACTGAAGGATGACGACTTTGAGAA	VEAFLTQKQKVGELKDDDFE	0	76	143		0	66.7803	51.8228		0
CTTGAGGCCTTTCTTACCCAGGGAGAACTGAAGGATGACGACTTTGAGAAGATCAGTGAGAG	LEAFLTQGELKDDDFEKISE	5726	76	0		2067.5	66.7803	0		30.9598
CTTGAGGCCTTTCTTACCCAGACGCAGAAAGGTGGGAGAACTGAAGGATGACGACTTTGAGA	LEAFLTQTQKGGRTEG*RL*	2060	76	0		743.81	66.7803	0		11.1382
CTTGAGGCCTTTCTTACCCAGAAGCAGAAAGGTGGAGAACTGAAGGATGACGACTTTGAGAA	LEAFLTQKQKGGELKDDDFE	282	76	0		101.822	66.7803	0		1.52474
CCTGAGGCCTTTCTTACCCAGAAGCAGAGGTGGGAGAACTGAAGGATGACGACTTTGAGAAG	PEAFLTQKQRWEN*RMTTLR	201	76	0		72.5756	66.7803	0		1.08678
CTTGAGGCCTTTCTTACCCAGAAGTAGGTGGGAGAACTGAAGGATGACGACTTTGAGAAGAT	LEAFLTQK*VGELKDDDFEK	161	76	0		58.1327	66.7803	0		0.870506
CTTGAGGCCTTTCTTACCTCAAGAAGAAAGGAGAACTGAAGGATGACGACTTTGAGAAGATC	LEAFLTSRRKEN*RMTTLRR	16	76	0		5.77716	66.7803	0		0.08651
CTTGAGGCCTTTCTTACCCAGAAGCAGCAGAAGGTGGGAGAACTGAAGGATGACGACTTTGA	LEAFLTQKQQKVGELKDDDF	7	76	0		2.52751	66.7803	0		0.0378481
CTTGAGGCCTTTCTTACCCAGAAGCAGTTCAGGTGGGAGAACTGAAGGATGACGACTTTGAG	LEAFLTQKQFRWEN*RMTTL	4	76	0		1.44429	66.7803	0		0.0216275
CTTGAGGCCTTTCTTACCTCAAGAACTGAAGGATGACGACTTTGAGAAGATCAGTGAGAGAT	LEAFLTSRTEG*RL*EDQ*E	0	76	0		0	66.7803	0		0
CTTGAGGCCTTTCTTACCCAGAAGCAGTAAGAATAAGAAGTGGGAGAACTGAAGGATGACGA	LEAFLTQKQ*E*EVGELKDD	0	76	0		0	66.7803	0		0
CTTGAGGCCTTTCTTACCTAGAAGCAGAAAGGTGGGAGAACTGAAGGATGACGACTTTGAGA	LEAFLT*KQKGGRTEG*RL*	243	75	0		87.7406	65.9016	0		1.33139
CTTGAGGCCTTTCTTACCCAGAAGCAGGTGGTAGAACTGAAGGATGACGACTTTGAGAAGAT	LEAFLTQKQVVELKDDDFEK	58	75	0		20.9422	65.9016	0		0.31778
CTTGAGGCCTTTCTTACCCAGAAGCATGGTGGGAGAACTGAAGGATGACGACTTTGAGAAGA	LEAFLTQKHGGRTEG*RL*E	1	75	0		0.361073	65.9016	0		0.00547896
CTTGAGGCTTTAGAACTGAAGGATGACGACTTTGAGAAGATCAGTGAGAGATCGGAAGAGCA	LEALELKDDDFEKISERSEE	0	75	0		0	65.9016	0		0
CTTGAGGCCTTTCTTACCCAGAAGCACCTAGGTGGGAGAACTGAAGGATGACGACTTTGAGA	LEAFLTQKHLGGRTEG*RL*	0	75	0		0	65.9016	0		0
CTTGAGGCCTTTCTTACCCAGAAGAAAGGGAGAACTGAAGGATGACGACTTTGAGAAGATCA	LEAFLTQKKGRTEG*RL*ED	0	75	0		0	65.9016	0		0
CTTGAGGACTTTCTTACCCAGAAGCAGAAGGTGGGAGAACTGAAGGATGACGACTTTGAGAA	LEDFLTQKQKVGELKDDDFE	4	74	376		1.44429	65.0229	136.261		0.022212
CTTGAGGCCTTTCTTACCCAGAAGCAGAGGTGGGAGAACTGAAGGGTGACGACTTTGAGAAG	LEAFLTQKQRWEN*RVTTLR	238	74	1		85.9353	65.0229	0.362397		1.32161
CTTGAGGCCTTTCTTACCCGGAAGCAGAGGTGGGAGAACTGAAGGATGACGACTTTGAGAAG	LEAFLTRKQRWEN*RMTTLR	191	74	1		68.9649	65.0229	0.362397		1.06062
CTTGAGGCCTTTCTTACCCAGACGCAGGTGGGAGAACTGAAGGATGACGACTTTGAGAAGAT	LEAFLTQTQVGELKDDDFEK	2026	74	0		731.533	65.0229	0		11.2504
CTTGAGGCCTTTCTTATCCAGAAGCAGAAAGGTGGGAGAACTGAAGGATGACGACTTTGAGA	LEAFLIQKQKGGRTEG*RL*	276	74	0		99.656	65.0229	0		1.53263
CTTGAGGCCTTTCTTACCCAGAAACAGGTGGGAGAACTGAAGGATGACGACTTTGAGAAGAT	LEAFLTQKQVGELKDDDFEK	260	74	0		93.8789	65.0229	0		1.44378
CTTGAGGCCTTTCTTACCCAGAAGCAGGTGGGAGAACTGAAGGATGACGACTTTGAGAAGCT	LEAFLTQKQVGELKDDDFEK	163	74	0		58.8548	65.0229	0		0.90514
CTTGAGGCCTTTCTTACCCAGAAGCAGAAATGTGGGAGAACTGAAGGATGACGACTTTGAGA	LEAFLTQKQKCGRTEG*RL*	64	74	0		23.1086	65.0229	0		0.355392
CTTGAGGCCTTTCTTACCCAGAAGCAGTAGGGAGAACTGAAGGATGACGACTTTGAGAAGAT	LEAFLTQKQ*GELKDDDFEK	17	74	0		6.13823	65.0229	0		0.0944011
CTTGAGGCCTTTCTTACCCAGAAGAAGGGAGAACTGAAGGATGACGACTTTGAGAAGATCAG	LEAFLTQKKGELKDDDFEKI	12	74	0		4.33287	65.0229	0		0.066636
CTTGAGGCCTTTCTTACCCAGTTCTTACTGAAGGATGACGACTTTGAGAAGATCAGTGAGAG	LEAFLTQFLLKDDDFEKISE	0	74	0		0	65.0229	0		0
CTTGAGGCCTTTCTTACCCAGAAGCAGAGAACTGAAGGATGGAGACTTTGAGAAGATCAGTG	LEAFLTQKQRTEGWRL*EDQ	0	74	0		0	65.0229	0		0
CTTGAGGCCTTTCGAGGTGGGAGAACTGAAGGATGACGACTTTGAGAAGATCAGTGAGAGAT	LEAFRGGRTEG*RL*EDQ*E	0	74	0		0	65.0229	0		0
CTTGAGGCCTTTCTTACCCAGAAGCAGAAGGTGGGAGAACGGAAGGATGACGACTTTGAGAA	LEAFLTQKQKVGERKDDDFE	10	73	365		3.61073	64.1442	132.275		0.0562907
CTTGAGGCCTTTATTACCCAGAAGCAGAAGGTGGGAGAACTGAAGGATGACGACTTTGAGAA	LEAFITQKQKVGELKDDDFE	12	73	231		4.33287	64.1442	83.7138		0.0675489
CTTGAGGCCTTTCTTGTGGGAGAACTGAAGGATGACGACTTTGAGAAGATCAGTGAGAGATC	LEAFLVGELKDDDFEKISER	714	73	0		257.806	64.1442	0		4.01916
CTTGAGGCCTTTCTTACCCAGAAGGTGGGAGAACTGAAGGATGACGAATTTGAGAAGATCAG	LEAFLTQKVGELKDDEFEKI	336	73	0		121.32	64.1442	0		1.89137
CTTGAGGCCTTTCTTACCCAGAAGCAGGTGGGAAAACTGAAGGATGACGACTTTGAGAAGAT	LEAFLTQKQVGKLKDDDFEK	164	73	0		59.2159	64.1442	0		0.923168
CTTGAGGCCTTTCTTACCTCAAGGTGGGAGAACTGAAGGATGACGACTTTGAGAAGATCAGT	LEAFLTSRWEN*RMTTLRRS	19	73	0		6.86038	64.1442	0		0.106952
CTTGAGGCCTTTCTTATCTAGGTGGGAGAACTGAAGGATGACGACTTTGAGAAGATCAGTGA	LEAFLI*VGELKDDDFEKIS	9	73	0		3.24965	64.1442	0		0.0506617
CTTGAGGCCTTTCTTACCCAGAAGGGTAAGGTGGGAGAACTGAAGGATGACGACTTTGAGAA	LEAFLTQKGKVGELKDDDFE	0	73	0		0	64.1442	0		0
CTTGAGGCCTTTCTTACCCAGAAGAAAGTTCTTCTTTCAGGAGAACTGAAGGATGACGACTT	LEAFLTQKKVLLSGELKDDD	0	73	0		0	64.1442	0		0
CTTGAGGCCTTTCTTACCCAGAAGCATAAGGTGGGAGAACTGAAGGATGACGACTTTGAGAA	LEAFLTQKHKVGELKDDDFE	2	72	211		0.722145	63.2656	76.4659		0.0114145
CTTGAGGCCTCTCTTACCCAGAAGCAGAACTGAAGGATGACGACTTTGAGAAGATCAGTGAG	LEASLTQKQN*RMTTLRRSV	88	72	0		31.7744	63.2656	0		0.502238
CTTGAGGCCTTTCTTACCCAGAAGCAGACTGGGAGAACTGAAGGATGACGACTTTGAGAAGA	LEAFLTQKQTGRTEG*RL*E	11	72	0		3.9718	63.2656	0		0.0627798
CTTGAGGCCTTTCTTACCCAGAAGCAGTTCTGAAGGATGACGACTTTGAGAAGATCAGTGAG	LEAFLTQKQF*RMTTLRRSV	5	72	0		1.80536	63.2656	0		0.0285363
CTTGAGGCCTTTCTTACCCAGAAGCATCTGAAGGTGGGAGAACTGAAGGATGACGACTTTGA	LEAFLTQKHLKVGELKDDDF	0	72	0		0	63.2656	0		0
CTTGAGGCCTTTCTTACCCAGAAGCAGGGTAAGAAGGATGACGACTTTGAGAAGATCAGTGA	LEAFLTQKQGKKDDDFEKIS	0	72	0		0	63.2656	0		0
CTTGAGGCCTTTCTTACCCAGAAGAACTGGGTGGGAGAACTGAAGGATGACGACTTTGAGAA	LEAFLTQKNWVGELKDDDFE	0	72	0		0	63.2656	0		0
CTTGAGACCTTTCTTACCCAGAAGCAGAAAGGTGGGAGAACTGAAGGATGACGACTTTGAGA	LETFLTQKQKGGRTEG*RL*	248	71	0		89.546	62.3869	0		1.43533
CTTGAGGCCTTTCTTACCCAGAAGCAGAAAGGTGGGAGAACTGAAGGATGACGACTTTGAGG	LEAFLTQKQKGGRTEG*RL*	178	71	0		64.2709	62.3869	0		1.0302
CTTGAGGCCTTTCTTACCCAGAAGCAGTAAGAAAGATGAACTTACTTACTTCAGTGGGAGAA	LEAFLTQKQ*ER*TYLLQWE	82	71	0		29.608	62.3869	0		0.474586
CTTGAGGCCTTTCTTACCCAGAAGCAGATTCTGGTGGGAGAACTGAAGGATGACGACTTTGA	LEAFLTQKQILVGELKDDDF	0	71	0		0	62.3869	0		0
CTTGAGGCCTTTCTTACCCAGAAGCAGAGGAGGTGGGAGAACTGAAGGATGACGACTTTGAG	LEAFLTQKQRRWEN*RMTTL	0	71	0		0	62.3869	0		0
CTTGAGGCCTTTCTTACCCAGAAGCAGAAGGTGCGAGAACTGAAGGATGACGACTTTGAGAA	LEAFLTQKQKVRELKDDDFE	12	70	456		4.33287	61.5082	165.253		0.0704438
CTTGAGGCCTTTCTTACCCAGAATCAGAAGGTGGGAGAACTGAAGGATGACGACTTTGAGAA	LEAFLTQNQKVGELKDDDFE	13	70	283		4.69394	61.5082	102.558		0.0763141
CTTGAGGCCTTTCTTAACCAGAAGCAGAAGGAGGGAGAACTGAAGGATGACGACTTTGAGAA	LEAFLNQKQKEGELKDDDFE	0	70	43		0	61.5082	15.5831		0
CTTGGGGCCTTTCTTACCCAGAAGCAGAGGTGGGAGAACTGAAGGATGACGACTTTGAGAAG	LGAFLTQKQRWEN*RMTTLR	279	70	1		100.739	61.5082	0.362397		1.63782
CTTGAGGCCTTTCTTACCCAGAGGGTGGGAGAACTGAAGGATGACGACTTTGAGAAGATCAG	LEAFLTQRVGELKDDDFEKI	247	70	0		89.1849	61.5082	0		1.44997
CTTGAGGCCTTTCTTACCCAGAAGGTGGGAGAACTGAAGGATGACGACTTGAGAAGATCAGT	LEAFLTQKVGELKDDDLRRS	204	70	0		73.6588	61.5082	0		1.19754
CTTGAGGCCTTTCTTACCCAGAAGCATGTGGGAGAACTGAAGGATGACGACTTTGAGAAGAT	LEAFLTQKHVGELKDDDFEK	65	70	0		23.4697	61.5082	0		0.381571
CTTGAGGCCTTTCTTACCCAGAAGCAGAACGACTTTGAGAAGATCAGTGAGAGATCGGAAGA	LEAFLTQKQNDFEKISERSE	30	70	0		10.8322	61.5082	0		0.17611
CTTGAGGCCAGGTGGGAGAACTGAAGGATGACGACTTTGAGAAGATCAGTGAGAGATCGGAA	LEARWEN*RMTTLRRSVRDR	10	70	0		3.61073	61.5082	0		0.0587032
CTTGAGGCCTTTCTTACCCAGGCCTTTCTTACCAGAAGGTGGGAGAACTGAAGGATGACGAC	LEAFLTQAFLTRRWEN*RMT	3	70	0		1.08322	61.5082	0		0.017611
CTTGAGGCCTTTCTTACCCAGAAGCAGGCCTTTCTCCCAGGTGGGAGAACTGAAGGATGACG	LEAFLTQKQAFLPGGRTEG*	0	70	0		0	61.5082	0		0
CTTGAGGAGAACTCAAGGCCTTTCTTACCCAGAAGAGAACTGAAGGATGACGACTTTGAGAA	LEENSRPFLPRRELKDDDFE	0	70	0		0	61.5082	0		0
CTTAAGGCCTTTCTTACCCAGAAGCAGAAAGGTGGGAGAACTGAAGGATGACGACTTTGAGA	LKAFLTQKQKGGRTEG*RL*	186	69	0		67.1595	60.6295	0		1.1077
CTTGAGGCCTTTCTTACCCAGAAGCAGAGAGCTGAAGGATGACGACTTTGAGAAGATCAGTG	LEAFLTQKQRAEG*RL*EDQ	88	69	0		31.7744	60.6295	0		0.524075
CTTGAGGCCTTTCTTACCCAGAAGCAGTAAGAAAGGTGGGAGAACTGAAGGATGACGACTTT	LEAFLTQKQ*ERWEN*RMTT	47	69	0		16.9704	60.6295	0		0.279904
CTTGAGGCCTTTCTTACCCAGAAGCAGGATGGAGAACTGAAGGATGATGACGACTTTGAGAA	LEAFLTQKQDGELKDDDDFE	0	69	0		0	60.6295	0		0
CTTGAGGCCTTTCTTACCCAGAAGCAGCAGTGAGAACTTCAGTGAGAACTGAAGGATGACGA	LEAFLTQKQQ*ELQ*ELKDD	0	69	0		0	60.6295	0		0
CTTGAGGCCTTTCTTACCCAGAAGCAGATTCAGGTGGGAGAACTGAAGGATGACGACTTTGA	LEAFLTQKQIQVGELKDDDF	0	69	0		0	60.6295	0		0
CTTGAGGCCTTTCTGACGACTTTGAGAAGATCAGTGAGAGATCGGAAGAGCACACGTCTGAA	LEAFLTTLRRSVRDRKSTRL	0	69	0		0	60.6295	0		0
CTTGAGGCCTTTCTTACCCAGAAGCAGAAGGTGGGAGAACTGAAGGATGACGACTTTTGAGA	LEAFLTQKQKVGELKDDDF*	13	68	351		4.69394	59.7508	127.202		0.0785587
CTTGAGGCCTTTCTTACCCAGAAGCAGGTGGTGGGAGAACTGAAGGATGACGACTTTGAGAA	LEAFLTQKQVVGELKDDDFE	3	68	5		1.08322	59.7508	1.81199		0.0181289
CTTGAGGCCTTTCTTACCCAGAAGCAGAGAACTTCCAGTTCCAGAGAACATCCAGTGGGAGA	LEAFLTQKQRTSSSREHPVG	5238	68	0		1891.3	59.7508	0		31.6531
CTTGAGGCCTTTCTTACCTAGAAGCAGGTGGGAGAACTGAAGGATGACGACTTTGAGAAGAT	LEAFLT*KQVGELKDDDFEK	261	68	0		94.24	59.7508	0		1.57722
CTTGAGGCCTTTCTTACCCAGAAGCAAAAAGGTGGGAGAACTGAAGGATGACGACTTTGAGA	LEAFLTQKQKGGRTEG*RL*	169	68	0		61.0213	59.7508	0		1.02126
CTTGAGGCCTTTCTTACCCAGAAGCAGAACTGAAGGATGACGACTTTGAGAAGACAGTGAGA	LEAFLTQKQN*RMTTLRRQ*	80	68	0		28.8858	59.7508	0		0.483438
CTTGAGGCCTTTCTTACCCAGAAGCAGATGACTGAAGGATGACGACTTTGAGAAGATCAGTG	LEAFLTQKQMTEG*RL*EDQ	23	68	0		8.30467	59.7508	0		0.138988
CTTGAGGCCTTTCTTACCCAGAAGCAGAGATGTGGGAGAACTGAAGGATGACGACTTTGAGA	LEAFLTQKQRCGRTEG*RL*	18	68	0		6.49931	59.7508	0		0.108774
CTTGAGGCCTTTCTTACAGAACTGAAGGATGACGACTTTGAGAAGATCAGTGAGAGATCGGA	LEAFLTELKDDDFEKISERS	8	68	0		2.88858	59.7508	0		0.0483438
CTTGAGGCCTTTCTTACCCATCTGCTTCTGGTGGGAGAACTGAAGGATGACGACTTTGAGAA	LEAFLTHLLLVGELKDDDFE	0	68	0		0	59.7508	0		0
CTTGAGGCCTTTCTTACCCAGAAGTTCAGGTGGGAGAACTGAAGGATGACGACTTTGAGAAG	LEAFLTQKFRWEN*RMTTLR	0	68	0		0	59.7508	0		0
CTTGAGGCCTTTCTTACCCAGAAGCCTTTCTTACCCAGGTGGGAGAACTGAAGGATGACGAC	LEAFLTQKPFLPRWEN*RMT	0	68	0		0	59.7508	0		0
CTTGAGGCCTTTCTTACCAGGATGACGACTTTGAGAAGATCAGTGAGAGATCGGAAGAGCAC	LEAFLTRMTTLRRSVRDRKS	0	68	0		0	59.7508	0		0
CTTGAGGCCTAAGGTGGGAGAACTGAAGGATGACGACTTTGAGAAGATCAGTGAGAGATCGG	LEA*GGRTEG*RL*EDQ*EI	0	68	0		0	59.7508	0		0
CTTGGGGCCTTTCTTACCCAGAAGGTGGGAGAACTGAAGGATGACGACTTTGAGAAGATCAG	LGAFLTQKVGELKDDDFEKI	217	67	1		78.3528	58.8721	0.362397		1.3309
CTTGAGGCCTTTCTTACCCAGAAGCAGAGGTGGGAGAACTGAAGGATGGCGACTTTGAGAAG	LEAFLTQKQRWEN*RMATLR	352	67	0		127.098	58.8721	0		2.15888
CTTGAGGCCTTTCTTACCCAGAAGCAGAGGTGGGGGAACTGAAGGATGACGACTTTGAGAAG	LEAFLTQKQRWGN*RMTTLR	254	67	0		91.7124	58.8721	0		1.55782
CTTGAGGCCTTTCTTACCCAGAAGCAGGTGGGAGAATTGAAGGATGACGACTTTGAGAAGAT	LEAFLTQKQVGELKDDDFEK	207	67	0		74.742	58.8721	0		1.26957
CTTGAGGCCTTTCTTACCCAGAAGGTGGGAGAACTGAAGGATGGCGACTTTGAGAAGATCAG	LEAFLTQKVGELKDGDFEKI	194	67	0		70.0481	58.8721	0		1.18983
CTTGAGGCCTTTCTTACCCAGAAGCAGAACCGAAGGATGACGACTTTGAGAAGATCAGTGAG	LEAFLTQKQNRRMTTLRRSV	90	67	0		32.4965	58.8721	0		0.551985
CTTGAGGCCTTTCTTACCCAGAAGCGGAACTGAAGGATGACGACTTTGAGAAGATCAGTGAG	LEAFLTQKRN*RMTTLRRSV	88	67	0		31.7744	58.8721	0		0.539719
CTTGAGGCCTTTCCTACCCAGAAGCAGAACTGAAGGATGACGACTTTGAGAAGATCAGTGAG	LEAFPTQKQN*RMTTLRRSV	65	67	0		23.4697	58.8721	0		0.398656
CTTGAGGCCTTTCTTACCCAGAAGCAAGAAAGGTGGGAGAACTGAAGGATGACGACTTTGAG	LEAFLTQKQERWEN*RMTTL	18	67	0		6.49931	58.8721	0		0.110397
CTTGAGGCCTTTCTTACCCAGAAGCAGATGAGAACTGAAGGATGACGACTTTGAGAAGATCA	LEAFLTQKQMRTEG*RL*ED	16	67	0		5.77716	58.8721	0		0.0981307
CTTGAGGCCTTTCTTACCCAGAAGCAGAGAACTGAAGGGAGAACTGAAGGATGACGACTTTG	LEAFLTQKQRTEGRTEG*RL	0	67	0		0	58.8721	0		0
CTTGAGGCCTTTCTTACCCAGAAGCAGAACTGAACTGAAGGGAGAACTGAAGGATGACGACT	LEAFLTQKQN*TEGRTEG*R	0	67	0		0	58.8721	0		0
CTTGAGGCCTTTCTTACCCAGAAGAAAGGCCTTGTGGCAGAACTGGGTGGGAGAACTGGGTA	LEAFLTQKKGLVAELGGRTG	0	67	0		0	58.8721	0		0
CTTGAGGCCTTTCTTACCAGAAGCTTCTGGTGGGAGAACTGAAGGATGACGACTTTGAGAAG	LEAFLTRSFWWEN*RMTTLR	0	67	0		0	58.8721	0		0
CTAGAACTGAAGGATGACGACTTTGAGAAGATCAGTGAGAGATCGGAAGAGCACACGTCTGA	LELKDDDFEKISERSEEHTS	0	67	0		0	58.8721	0		0
CTTGAGGCCTTTCTTCCCCAGAAGAAGAAGGTGGGAGAACTGAAGGATGACGACTTTGAGAA	LEAFLPQKKKVGELKDDDFE	0	66	15		0	57.9934	5.43596		0
CTTGAGGCCTTTCTTACCCAGAAGCAGAACTGAAGGATGGCGACTTTGAGAAGATCAGTGAG	LEAFLTQKQN*RMATLRRSV	102	66	0		36.8294	57.9934	0		0.635062
CTTGAGGCCTTTCTTACCCAGAAGCAGACAGGAGGGAGAACTGAAGGATGACGACTTTGAGA	LEAFLTQKQTGGRTEG*RL*	58	66	0		20.9422	57.9934	0		0.361114
CTTGAGGCCTTTCTTACCCAGAAGCAGTGAAGGATGACGACTTTGAGAAGATCAGTGAGAGA	LEAFLTQKQ*RMTTLRRSVR	38	66	0		13.7208	57.9934	0		0.236592
CTTGAGGCCTTTCTTACCCAGAAGCAGATGAACTGAAGGATGACGACTTTGAGAAGATCAGT	LEAFLTQKQMN*RMTTLRRS	5	66	0		1.80536	57.9934	0		0.0311305
CTTGAGGCCTTTCTTACCCAGAAGCAGGAGAACTGCTTCTTACCCAGAAGAAGGTGGGAGAA	LEAFLTQKQENCFLPRRRWE	0	66	0		0	57.9934	0		0
CTTGAGGCCTTTCTTACCCAGAAGCAGAACTTCTGAGAACTGAAGGATGACGACTTTGAGAA	LEAFLTQKQNF*ELKDDDFE	0	66	0		0	57.9934	0		0
CTTGAGGCCCAGAACTGAAGGATGACGACTTTGAGAAGATCAGTGAGAGATCGGAAGAGCAC	LEAQN*RMTTLRRSVRDRKS	0	66	0		0	57.9934	0		0
CTTGAGGCCTTTCTTACCCAGAAGCAGAAGGTGGGAGAACTGAAGGATGACGACTTTGACAA	LEAFLTQKQKVGELKDDDFD	7	65	216		2.52751	57.1147	78.2779		0.0442532
CTTGAGGCCTTTCTTACCCAGAAGCAGAAAGGTGGGAGAACTGAAAGATGACGACTTTGAGA	LEAFLTQKQKGGRTER*RL*	290	65	0		104.711	57.1147	0		1.83335
CTTGAGGCCCTTCTTACCCAGAAGGTGGGAGAACTGAAGGATGACGACTTTGAGAAGATCAG	LEALLTQKVGELKDDDFEKI	194	65	0		70.0481	57.1147	0		1.22645
CTTGAGGCCTTCCTTACCCAGAAGGTGGGAGAACTGAAGGATGACGACTTTGAGAAGATCAG	LEAFLTQKVGELKDDDFEKI	176	65	0		63.5488	57.1147	0		1.11265
CTTGAGGCCTTTCTTACCCAGAAGCAGAAAGTTGGGAGAACTGAAGGATGACGACTTTGAGA	LEAFLTQKQKVGRTEG*RL*	35	65	0		12.6375	57.1147	0		0.221266
CTTGAGGCCTTTCTTACCCAGAAGCAGAACCAGGTGGGAGAACTGAAGGATGACGACTTTGA	LEAFLTQKQNQVGELKDDDF	10	65	0		3.61073	57.1147	0		0.0632188
CTTGAGGCCTTTCTTACCCAGAAGCTTACCCAGGTGGGAGAACTGAAGGATGACGACTTTGA	LEAFLTQKLTQVGELKDDDF	0	65	0		0	57.1147	0		0
CTTGAGGCCTTTCTTACCCAGAAGCAGTAGAGACTGAAGGATGACGACTTTGAGAAGATCAG	LEAFLTQKQ*RLKDDDFEKI	0	65	0		0	57.1147	0		0
CTTGAGGCCTTTCTTACCAGAAGCAGGTGGGAGAACTGAAGAACTGAAGGATGACGACTTTG	LEAFLTRSRWEN*RTEG*RL	0	65	0		0	57.1147	0		0
CTTGAGGCCTGAACTGAAGGATGACGACTTTGAGAAGATCAGTGAGAGATCGGAAGAGCACA	LEA*TEG*RL*EDQ*EIGRA	0	65	0		0	57.1147	0		0
CTCGAGGCCTTTCTTACCCAGAAGCAGAGGTGGGAGAACTGAAGGATGACGACTTTGAGAAG	LEAFLTQKQRWEN*RMTTLR	183	64	2		66.0763	56.2361	0.724795		1.17498
CTTGAGGCCTTTCTTACCCAGGAGCAGAGGTGGGAGAACTGAAGGATGACGACTTTGAGAAG	LEAFLTQEQRWEN*RMTTLR	217	64	1		78.3528	56.2361	0.362397		1.39328
CTTGAGGCCTTTCTTACCCAGAAGCAGGTGGGAGAACTGAAGGATGACGACTTTGAGAAGAA	LEAFLTQKQVGELKDDDFEK	663	64	0		239.391	56.2361	0		4.2569
CTTGAGGCCTTTCTTACCCAGAAGCAGGTGGGAGAACTGAAGAATGACGACTTTGAGAAGAT	LEAFLTQKQVGELKNDDFEK	288	64	0		103.989	56.2361	0		1.84915
CTTGAGGCCTTTCTTACCCAGAAGCAGGTGGGAGAACTGAAAGATGACGACTTTGAGAAGAT	LEAFLTQKQVGELKDDDFEK	265	64	0		95.6842	56.2361	0		1.70148
CTTGAGGCCTTTCTTACCCAGAAGCAGGTGGGAGAACTGAAGGATGACGACTTTTAGAAGAT	LEAFLTQKQVGELKDDDF*K	187	64	0		67.5206	56.2361	0		1.20066
CTTGAGGCCTTTCTTACCCAGAAGCAGGTGTGAGAACTGAAGGATGACGACTTTGAGAAGAT	LEAFLTQKQV*ELKDDDFEK	125	64	0		45.1341	56.2361	0		0.802583
CTTGAGGCCTTTCTTACACAGAAGCAGAAAGGTGGGAGAACTGAAGGATGACGACTTTGAGA	LEAFLTQKQKGGRTEG*RL*	96	64	0		34.663	56.2361	0		0.616383
CTTGAGGCCTTTCTTACGAGAACTGAAGGATGACGACTTTGAGAAGATCAGTGAGAGATCGG	LEAFLTRTEG*RL*EDQ*EI	63	64	0		22.7476	56.2361	0		0.404502
CTTGAGGTGGGTAAGAACTGAAGGATGACGACTTTGAGAAGATCAGTGAGAGATCGGAAGAG	LEVGKN*RMTTLRRSVRDRK	0	64	0		0	56.2361	0		0
CTTGAGGCCTTTCTTACCCAGAAGCACTTTGAGAAGATCAGTGAGAGATCGGAAGAGCACAC	LEAFLTQKHFEKISERSEEH	0	64	0		0	56.2361	0		0
CTTGAGGCCTTTCTTACCCAGAAGCAGAAGGTGGGAGAACTGAAGGAGGACGACTTTGAGAA	LEAFLTQKQKVGELKEDDFE	6	63	281		2.16644	55.3574	101.834		0.0391355
CTGGAGGCCTTTCTTACCCAGAAGCAGAAGGTGGGAGAACTGAAGGATGACGACTTTGAGAA	LEAFLTQKQKVGELKDDDFE	17	63	212		6.13823	55.3574	76.8283		0.110884
CTTGAGGCCTTTCTTCCCCAGAAGCAGAAGGTGGGAGAACTGAAGGATGCCGACTTTGAGAA	LEAFLPQKQKVGELKDADFE	0	63	18		0	55.3574	6.52315		0
CTTGAGGCCTTTCTTACCCAGAAGGGGGGAGAACTGAAGGATGACGACTTTGAGAAGATCAG	LEAFLTQKGGELKDDDFEKI	267	63	0		96.4064	55.3574	0		1.74153
CTTGAGGCCTTTCTTACCCAGAAGCAGAAAGGTGGGAGAACTGAAGGCTGACGACTTTGAGA	LEAFLTQKQKGGRTEG*RL*	190	63	0		68.6038	55.3574	0		1.23929
CTTGAGGCCTTTCTTACCCAGAAGGTGGGAGGACTGAAGGATGACGACTTTGAGAAGATCAG	LEAFLTQKVGGLKDDDFEKI	188	63	0		67.8817	55.3574	0		1.22624
CTTGAGGCCTTTCTTACCCAGAAGGTGGGAGAACCGAAGGATGACGACTTTGAGAAGATCAG	LEAFLTQKVGEPKDDDFEKI	186	63	0		67.1595	55.3574	0		1.2132
CTTGAGGCCTTTCTTACCCAGAAGCAGAGAACTGAAGGATGACGACTTTGAGAAATCAGTGA	LEAFLTQKQRTEG*RL*EIS	161	63	0		58.1327	55.3574	0		1.05013
CTTGAGGCCTTTCTTACCCAGAAGCAGAGAACTGAAGGATGACGACTTTGAAAGATCAGTGA	LEAFLTQKQRTEG*RL*KIS	135	63	0		48.7448	55.3574	0		0.880548
CTTGAGGCCTTTCTTACCCAGAAGCAGAACTGGAGGATGACGACTTTGAGAAGATCAGTGAG	LEAFLTQKQNWRMTTLRRSV	83	63	0		29.969	55.3574	0		0.541374
CTTGAGGCCTTTCTAGGATGACGACTTTGAGAAGATCAGTGAGAGATCGGAAGAGCACACGT	LEAFLG*RL*EDQ*EIGRAH	27	63	0		9.74896	55.3574	0		0.17611
CTTGAGGCCTTTCTTACCCAGAAGCAGATGGATGACGACTTTGAGAAGATCAGTGAGAGATC	LEAFLTQKQMDDDFEKISER	18	63	0		6.49931	55.3574	0		0.117406
CTTGAGGCCTTTCTTACCCAGAAGCAGGTAAGAACTGAAGGATGACGACTTTGAGAAGATCA	LEAFLTQKQVRTEG*RL*ED	8	63	0		2.88858	55.3574	0		0.0521806
CTTGAGGCCTTTCTTACCCAGAGGGATGACGACTTTGAGAAGATCAGTGAGAGATCGGAAGA	LEAFLTQRDDDFEKISERSE	7	63	0		2.52751	55.3574	0		0.045658
CTTGAGGCCTTTCTTACCCAGAAGAATGACGACTTTGAGAAGATCAGTGAGAGATCGGAAGA	LEAFLTQKNDDFEKISERSE	6	63	0		2.16644	55.3574	0		0.0391355
CTTGAGGCCTTTCTTACCCAGAAGCATGAAGGATGACGACTTTGAGAAGATCAGTGAGAGAT	LEAFLTQKHEG*RL*EDQ*E	1	63	0		0.361073	55.3574	0		0.00652258
CTTGAGGCCTTTCTTACCCAGAAGCAGAATGTGGGAGAACTGAAGGATGACGACTTTGAGAA	LEAFLTQKQNVGELKDDDFE	14	62	632		5.05502	54.4787	229.035		0.0927889
CTTGAGGCCTATCTTACCCAGAAGCAGAAGGTGGGAGAACTGAAGGATGACGACTTTGAGAA	LEAYLTQKQKVGELKDDDFE	9	62	414		3.24965	54.4787	150.033		0.05965
CTTGAGGCCTTTCTTACCCAGAAGCAGAGGAGGGAGAACTGAAGGATGACGACTTTGAGAAG	LEAFLTQKQRREN*RMTTLR	1503	62	0		542.692	54.4787	0		9.96155
CTTGAGGCCTTTCTTACCCAGAAGCAGAAAGGTGGGAGAACTGAAGGATGACGACTTTGAGC	LEAFLTQKQKGGRTEG*RL*	406	62	0		146.595	54.4787	0		2.69088
CTTGAGGCCTTTCTTACCCAGGTGGGAGAACTGAAGGATGACGACTTTGAGAGATCAGTGAG	LEAFLTQVGELKDDDFERSV	273	62	0		98.5728	54.4787	0		1.80938
CTTGAGGCCTTTCTTCTGAAGGATGACGACTTTGAGAAGATCAGTGAGAGATCGGAAGAGCA	LEAFLLKDDDFEKISERSEE	209	62	0		75.4642	54.4787	0		1.38521
CTTGAGGCCTTTCTTACCCAGAAGCCGAAAGGTGGGAGAACTGAAGGATGACGACTTTGAGA	LEAFLTQKPKGGRTEG*RL*	159	62	0		57.4105	54.4787	0		1.05382
CTTGAGGCCTTTCTTACCCAGAAGCAGGAGGGAGAACTGCAGGATGACGACTTTGAGAAGAT	LEAFLTQKQEGELQDDDFEK	102	62	0		36.8294	54.4787	0		0.676033
CTTGAGGCCTTTCTTACCCAGAAGCAGAACTGAAGGATGACGACTTGAGAAGATCAGTGAGA	LEAFLTQKQN*RMTT*EDQ*	84	62	0		30.3301	54.4787	0		0.556733
CTTGAGGCCTTTCTTACCGAAGGATGACGACTTTGAGAAGATCAGTGAGAGATCGGAAGAGC	LEAFLTEG*RL*EDQ*EIGR	53	62	0		19.1368	54.4787	0		0.351272
CTTGAGGCCTTTCTTACCCAGAAGCAGAACTGCAGGATGACGACTTTGAGAAGATCAGTGAG	LEAFLTQKQNCRMTTLRRSV	31	62	0		11.1933	54.4787	0		0.205461
CTTGAGGCCTTTCTTACCCAGAAGCAGAGAACCCAGGTGGGAGAACTGAAGGATGACGACTT	LEAFLTQKQRTQVGELKDDD	29	62	0		10.4711	54.4787	0		0.192206
CTTGAGGCCTTTCTTACCCAGAAGCAGAACTGGGTAAGGTGGGAGAACTGAAGGATGACGAC	LEAFLTQKQNWVRWEN*RMT	21	62	0		7.58252	54.4787	0		0.139183
CTTGAGGCCTTTCTTACCCAGCGCTTTCGTGGTGGGAGAACTGAAGGATGACGACTTTGAGA	LEAFLTQRFRGGRTEG*RL*	0	62	0		0	54.4787	0		0
CTTGAGGCCTTTCTTACCCAGAAGCAGTAAGAGAACTGAAGGATGACGACTTTGAGAAGATC	LEAFLTQKQ*EN*RMTTLRR	0	62	0		0	54.4787	0		0
CTTGAGGCCTTTCTTACCCAGAAGCAGAAAGGAACTGAAGGATGACGACTTTGAGAAGATCA	LEAFLTQKQKGTEG*RL*ED	0	62	0		0	54.4787	0		0
CTTGAGGCCTTTCTTACCCAGAAGCAGAAGGTGGGAGAACTGAAGGATGACGACTTCGAGAA	LEAFLTQKQKVGELKDDDFE	9	61	554		3.24965	53.6	200.768		0.0606279
CTTGAGGCCTTTCTTACCCAGAAGCAGAAGGAGGGAGAACTGAAGGATGACGACTATGAGAA	LEAFLTQKQKEGELKDDDYE	15	61	37		5.41609	53.6	13.4087		0.101046
CTTGAGGCCTTTCTTACCCAGAAGCAGAGGGGTGGGAGAACTGAAGGATGACGACTTTGAGA	LEAFLTQKQRGGRTEG*RL*	411	61	0		148.401	53.6	0		2.76867
CTTGAGGCCTTTCTTACCCAGAAGGCGGGAGAACTGAAGGATGACGACTTTGAGAAGATCAG	LEAFLTQKAGELKDDDFEKI	289	61	0		104.35	53.6	0		1.94683
CTTGAGGCCTTTCTTATCCAGAAGCAGGTGGGAGAACTGAAGGATGACGACTTTGAGAAGAT	LEAFLIQKQVGELKDDDFEK	258	61	0		93.1567	53.6	0		1.738
CTTGAGGCCTTTCTTACCCAGAAGCAGAAGAGGTGGGAGAACTGAAGGATGACGACTTTGAG	LEAFLTQKQKRWEN*RMTTL	51	61	0		18.4147	53.6	0		0.343558
CTTGAGGCCTTTCTTACCCAGAAGCACTTTCTTACCAGAAGCACTCTTACTGAAGGATGACG	LEAFLTQKHFLTRSTLTEG*	9	61	0		3.24965	53.6	0		0.0606279
CTTGAGGCCTTTCTTACCCAGAAGCAGAACTGAAGAACTGAAGGATGACGACTTTGAGAAGA	LEAFLTQKQN*RTEG*RL*E	7	61	0		2.52751	53.6	0		0.047155
CTTGAGGCCTTTCTTATCTGTCTGGCCCCAGACCTGGAGCTTTCTTTCCATGATAGGAGTAC	LEAFLICLAPDLELSFHDRS	2	61	0		0.722145	53.6	0		0.0134729
CTTGAGGCCTTTCTTGAAGGTGGGAGAACTGAAGGATGACGACTTTGAGAAGATCAGTGAGA	LEAFLEGGRTEG*RL*EDQ*	0	61	0		0	53.6	0		0
CTTGAGGCCTTTCTTACCCAGAAGCAGTTACCCAGGTGGGAGAACTGAAGGATGACGACTTT	LEAFLTQKQLPRWEN*RMTT	0	61	0		0	53.6	0		0
CTTGAGGCCTTTCTTACCCAGAAGCAGGGATGACTTTGAGAAGATCAGTGAGAGATCGGAAG	LEAFLTQKQG*L*EDQ*EIG	0	61	0		0	53.6	0		0
CTTGAGGCCTTTCTTACCCAGAAGCAGCGAAAGCGCCTTGAGGCCTTTCTTACCCAGAAGCA	LEAFLTQKQRKRLEAFLTQK	0	61	0		0	53.6	0		0
CTTGAGGCCTTTCTTACCCAGAAGCAGAGACTTGTGCTCCCCACTTTGGAACAGGACCAACT	LEAFLTQKQRLVLPTLEQDQ	0	61	0		0	53.6	0		0
CTTGAGGCCTTTCTTACCCAGAAGCAGAAACTGGGAGAACTGAAGGATGACGACTTTGAGAA	LEAFLTQKQKLGELKDDDFE	2	60	5		0.722145	52.7213	1.81199		0.0136974
CTTGAGGCCTTTCTTACCCAGAAGCAGGTGGGAGAACTGAAGGATGACGACTTTGAGAAGAG	LEAFLTQKQVGELKDDDFEK	262	60	0		94.601	52.7213	0		1.79436
CTTGAGGCCTTTCTTACCCTGAAGCAGGTGGGAGAACTGAAGGATGACGACTTTGAGAAGAT	LEAFLTLKQVGELKDDDFEK	239	60	0		86.2964	52.7213	0		1.63684
CTTGAGGCCTTTCTGGTGGGAGAACTGAAGGATGACGACTTTGAGAAGATCAGTGAGAGATC	LEAFLVGELKDDDFEKISER	137	60	0		49.4669	52.7213	0		0.938273
CTCGAGGCCTTTCTTACCCAGAAGCAGAACTGAAGGATGACGACTTTGAGAAGATCAGTGAG	LEAFLTQKQN*RMTTLRRSV	87	60	0		31.4133	52.7213	0		0.595837
CTTGAGGCCTTTCTTACCCAGAAGCGGGAGAACTGAAGGATGACGACTTTGAGAAGATCAGT	LEAFLTQKREN*RMTTLRRS	29	60	0		10.4711	52.7213	0		0.198612
CTTGAGGCCTTTCTTACCCAGAAGCAGAACTTACCCAGAAGGTGGGAGAACTGAAGGATGAC	LEAFLTQKQNLPRRWEN*RM	13	60	0		4.69394	52.7213	0		0.0890332
CTTGAGGCCTTTCTTACCCAGAAGCAGGTAAGGTCACCTGAAGGATGACGACTTTGAGAAGA	LEAFLTQKQVRSPEG*RL*E	12	60	0		4.33287	52.7213	0		0.0821845
CTTGAGGCCTTTCTTACCCAGAAGCAGACAGAACTGAAGGATGACGACTTTGAGAAGATCAG	LEAFLTQKQTELKDDDFEKI	7	60	0		2.52751	52.7213	0		0.0479409
CTTGAGGCCTTTCTTACCCAGAAGCAGAACTTTCTTACCCAGAACTGAAGGATGACGACTTT	LEAFLTQKQNFLTQN*RMTT	3	60	0		1.08322	52.7213	0		0.0205461
CTTGAGGCCTTTCTTACCCAGAAGCAGAGAAGAAGGTGGGAGAACTGAAGGATGACGACTTT	LEAFLTQKQRRRWEN*RMTT	0	60	0		0	52.7213	0		0
CTTGAGGCCTTTCTTACCCAGAAGAAAGACGACTTTGAGAAGATCAGTGAGAGATCGGAAGA	LEAFLTQKKDDFEKISERSE	0	60	0		0	52.7213	0		0
CTTGAGGCCTTTCTTACCCAGGTGGGAGAACTGAAGGATGACGACTTTGAGAAATCAGTGAG	LEAFLTQVGELKDDDFEKSV	265	59	0		95.6842	51.8426	0		1.84567
CTTGAGGCCTCTCTTACCCAGAAGCAGAGGTGGGAGAACTGAAGGATGACGACTTTGAGAAG	LEASLTQKQRWEN*RMTTLR	247	59	0		89.1849	51.8426	0		1.7203
CTTGAGGCCTTTCTTACCCAGAAGCAGAACTGAAGGATGACGAATTTGAGAAGATCAGTGAG	LEAFLTQKQN*RMTNLRRSV	224	59	0		80.8803	51.8426	0		1.56011
CTCGAGGCCTTTCTTACCCAGAAGGTGGGAGAACTGAAGGATGACGACTTTGAGAAGATCAG	LEAFLTQKVGELKDDDFEKI	168	59	0		60.6602	51.8426	0		1.17008
CTTGAGGCCTTTCTTATCCAGAAGGTGGGAGAACTGAAGGATGACGACTTTGAGAAGATCAG	LEAFLIQKVGELKDDDFEKI	51	59	0		18.4147	51.8426	0		0.355204
CTTGAGGCCTTTCTTACCCAGAAGCAGAACTGAAGAGAACTGAAGGATGACGACTTTGAGAA	LEAFLTQKQN*RELKDDDFE	20	59	0		7.22145	51.8426	0		0.139296
CTTGAGGCCTTTCTTACCCAGAAGCAGATAACTGAAGGATGACGACTTTGAGAAGATCAGTG	LEAFLTQKQITEG*RL*EDQ	14	59	0		5.05502	51.8426	0		0.097507
CTTGAGGCCTTTCTTACCCAGAAGGGTGGGAGAACTGAAGGATGACGACTTTGAGAAGATCA	LEAFLTQKGGRTEG*RL*ED	9	59	0		3.24965	51.8426	0		0.0626831
CTTGAGGCCTTTCTTACCCAGAAGCAGAACCCAGGGAGAACTGAAGGATGACGACTTTGAGA	LEAFLTQKQNPGRTEG*RL*	5	59	0		1.80536	51.8426	0		0.0348239
CTTGAGGCCTTTCTTACCCAGAAGCAGTGGGAGAACTGAAGGTGGGAGAACTGAAGGATGAC	LEAFLTQKQWEN*RWEN*RM	0	59	0		0	51.8426	0		0
CTTGAGGCCTTTCTTACCCAGAAGCAGGTAAGAGATGACGGAGCAGGTGGGAGAACTGAAGG	LEAFLTQKQVRDDGAGGRTE	0	59	0		0	51.8426	0		0
CTTGAGGCCTTTCTTACCCAGAAGCAGAAGCAGAAGCAGAAGCAGAAGGTGGGAGAACTGAA	LEAFLTQKQKQKQKQKVGEL	0	59	0		0	51.8426	0		0
CTTGAGGCCTTTCTTACCCAGAAGCAGAAGAAACTGAAACTGAAGCAGAAGAAACTGAAGGA	LEAFLTQKQKKLKLKQKKLK	0	59	0		0	51.8426	0		0
CTTGAGGCCTTTCTTTCCCAGAAGCAGAAGGTGGGAGAACTGAAGGATGACGACTTTGAGAA	LEAFLSQKQKVGELKDDDFE	21	58	415		7.58252	50.9639	150.395		0.148782
CTTGAGGCCTTTCTTACCAGAAGCAGAAAGGTGGGAGAACTGAAGGATGACGACTTTGAGAA	LEAFLTRSRKVGELKDDDFE	189	58	0		68.2427	50.9639	0		1.33904
CTTGAGGCCTTTCAGAACTGAAGGATGACGACTTTGAGAAGATCAGTGAGAGATCGGAAGAG	LEAFQN*RMTTLRRSVRDRK	173	58	0		62.4656	50.9639	0		1.22568
CTTGAGGCCTTTGGTGGGAGAACTGAAGGATGACGACTTTGAGAAGATCAGTGAGAGATCGG	LEAFGGRTEG*RL*EDQ*EI	24	58	0		8.66574	50.9639	0		0.170037
CTTGAGGCCTTTCTTACCCAGGAGAACTTTCTTACTTCAGGAGAACTGAAGGATGACGACTT	LEAFLTQENFLTSGELKDDD	23	58	0		8.30467	50.9639	0		0.162952
CTTGAGGCCTTTCTTACCCAGAAGCACTGAAGGAGAACTGAAGGATGACGACTTTGAGAAGA	LEAFLTQKH*RRTEG*RL*E	13	58	0		4.69394	50.9639	0		0.0921033
CTTGAGGCCTTTCTTACCCAGAAGCAGAGAACTTAAGGATGACGACTTTGAGAAGATCAGTG	LEAFLTQKQRT*G*RL*EDQ	8	58	0		2.88858	50.9639	0		0.0566789
CTTGAGGCCTTTCTTACCCAGAAGCAGAAGGATGGGAGAACTGAAGGATGACGACTTTGAGA	LEAFLTQKQKDGRTEG*RL*	4	58	0		1.44429	50.9639	0		0.0283395
CTTGAGGCCTTTCTTACCCAGAAGCAAGGGAGAACTGAAGGATGACGACTTTGAGAAGATCA	LEAFLTQKQGRTEG*RL*ED	1	58	0		0.361073	50.9639	0		0.00708487
CTTGAGGCCTTTCTTACCCAGAAGCAGGCCTCTGGGTAAGAGAACTGAAGGATGACGACTTT	LEAFLTQKQASG*EN*RMTT	0	58	0		0	50.9639	0		0
CTTGAGGCCTTTCTTACCCAGAAGCAGGAAGCAGTCTTCTGAAGGATGACGACTTTGAGAAG	LEAFLTQKQEAVF*RMTTLR	0	58	0		0	50.9639	0		0
CTTGAGGCCTTTCTGACCCAGAAGCAGAAGGTGGGAGAACTGAAGGATGACGACTTTGAGAA	LEAFLTQKQKVGELKDDDFE	0	57	85		0	50.0852	30.8038		0
CTTGAGGCCTTTCTTACCCAGAAGGTGGGAGAACTGAGGGATGACGACTTTGAGAAGATCAG	LEAFLTQKVGELRDDDFEKI	212	57	0		76.5474	50.0852	0		1.52834
CTTGAGGCCTTTCTTACCCAGAAGCAGGTGGGAGAACTGAAGGATGACGACTTTGAGCAGAT	LEAFLTQKQVGELKDDDFEQ	172	57	0		62.1045	50.0852	0		1.23998
CTTGAGGCCTTTCTTACCCAGAAGCAGAAAGGTGGGAGACCTGAAGGATGACGACTTTGAGA	LEAFLTQKQKGGRPEG*RL*	163	57	0		58.8548	50.0852	0		1.17509
CTTGAGGCCTTTCCTACCCAGAAGGTGGGAGAACTGAAGGATGACGACTTTGAGAAGATCAG	LEAFPTQKVGELKDDDFEKI	136	57	0		49.1059	50.0852	0		0.980446
CTTGAGGCCTTTCTTACCCAGAAGCAGGTGGGAGAACTGAAGGATGACTACTTTGAGAAGAT	LEAFLTQKQVGELKDDYFEK	70	57	0		25.2751	50.0852	0		0.504641
CTTAAGGATGACGACTTTGAGAAGATCAGTGAGAGATCGGAAGAGCACACGTCTGAACTCCA	LKDDDFEKISERSEEHTSEL	11	57	0		3.9718	50.0852	0		0.0793008
CTTGAGGCCTTTCTTACCCAGAAGCAGGAGGGTGGGAGAACTGAAGGATGACGACTTTGAGA	LEAFLTQKQEGGRTEG*RL*	4	57	0		1.44429	50.0852	0		0.0288367
CTTGAGGCCTTTCTTACCCAGAAGCATGACGAGAACTGAAGGATGACGACTTTGAGAAGATC	LEAFLTQKHDEN*RMTTLRR	0	57	0		0	50.0852	0		0
CTTGAGGCCTTTCTTACCCAGAAGCAGTGGGTAAGATGGGAGAACTGAAGGATGACGACTTT	LEAFLTQKQWVRWEN*RMTT	0	57	0		0	50.0852	0		0
CTTGAGGCCTTTCTTACCCAGAAGCAGTGGGTAACTGAAGATGGGAGAACTGAAGGATGACG	LEAFLTQKQWVTEDGRTEG*	0	57	0		0	50.0852	0		0
CTTGAGGCCTTTCTTACCCAGAAGCAGAACTGAACTGAAGGATGAAGGATGAAAAGCAGAAC	LEAFLTQKQN*TEG*RMKSR	0	57	0		0	50.0852	0		0
CTTGAGGCCTTTCTTACCCAGAAGCAGAAACTTCTTCAACTGAAGGATGACGACTTTGAGAA	LEAFLTQKQKLLQLKDDDFE	0	57	0		0	50.0852	0		0
CTTGAGGCCTTTCTTACCCAGAAGCAAGGCCTGGGTAAGAAACTGAAGGATGACGACTTTGA	LEAFLTQKQGLGKKLKDDDF	0	57	0		0	50.0852	0		0
CTTGAGGCCTTGAGGCCTTTCTTACCCAGAAGGTGGGAGAACTGAAGGATGACGACTTTGAG	LEALRPFLPRRWEN*RMTTL	0	57	0		0	50.0852	0		0
CTTGAGGCCTTTCTTACCCAGAAGCAGAAAGGTGGGAGAACTGCAGGATGACGACTTTGAGA	LEAFLTQKQKGGRTAG*RL*	336	56	0		121.32	49.2065	0		2.46553
CTTCAGGTGGGAGAACTGAAGGATGACGACTTTGAGAAGATCAGTGAGAGATCGGAAGAGCA	LQVGELKDDDFEKISERSEE	281	56	0		101.461	49.2065	0		2.06195
CTTGAGGCCTTTCTTACCCAGAAGCAGGTGGGAGAACTGAAGGATGACGACCTTGAGAAGAT	LEAFLTQKQVGELKDDDLEK	280	56	0		101.1	49.2065	0		2.05461
CTTGAGGCCTTTCTTACCCAGAAGCAGGTGGGAGAACTGAAGGATGTCGACTTTGAGAAGAT	LEAFLTQKQVGELKDVDFEK	225	56	0		81.2413	49.2065	0		1.65103
TTTGAGGCCTTTCTTACCCAGAAGCAGAAAGGTGGGAGAACTGAAGGATGACGACTTTGAGA	FEAFLTQKQKGGRTEG*RL*	185	56	0		66.7984	49.2065	0		1.35751
CTTGAGGCCTTTCTTACCCAGAAGCAGAAAGGTGGGAGAACTGAAGGAAGACGACTTTGAGA	LEAFLTQKQKGGRTEGRRL*	99	56	0		35.7462	49.2065	0		0.726452
CTTGAGGCCTTTCTTACCCAGAAGCAGAACTTTCTTACCCAGAAGCAGGTGGGAGAACTGAA	LEAFLTQKQNFLTQKQVGEL	25	56	0		9.02682	49.2065	0		0.183447
CTTGAGGCCTTTCTTACCCAGAAGCAGGGATGACGACTTTGAGAAGATCAGTGAGAGATCGG	LEAFLTQKQG*RL*EDQ*EI	16	56	0		5.77716	49.2065	0		0.117406
CTTGAGAGGTGGGAGAACTGAAGGATGACGACTTTGAGAAGATCAGTGAGAGATCGGAAGAG	LERWEN*RMTTLRRSVRDRK	16	56	0		5.77716	49.2065	0		0.117406
CTTGAGGCCTTTCTTACCCAGAAGCAGCTTGAGAGAACTGAAGGATGACGACTTTGAGAAGA	LEAFLTQKQLERTEG*RL*E	0	56	0		0	49.2065	0		0
CTTGAGGCCTTTCTTACCCAGAAGCAGCTTCTGGGAGAACTGAAGGATGACGACTTTGAGAA	LEAFLTQKQLLGELKDDDFE	0	56	0		0	49.2065	0		0
CTTGAGGCCTTTCTTACCAGAAACTGGGAGAACTGAAGGATGACGACTTTGAGAAGATCAGT	LEAFLTRNWEN*RMTTLRRS	0	56	0		0	49.2065	0		0
CTTGAGGCCTTTCTTACCCAGAAGCAGGTGGGAGAACTGACGGATGACGACTTTGAGAAGAT	LEAFLTQKQVGELTDDDFEK	307	55	0		110.849	48.3279	0		2.29369
CTTGAGGCCTTTCTTACCCCGAAGCAGGTGGGAGAACTGAAGGATGACGACTTTGAGAAGAT	LEAFLTPKQVGELKDDDFEK	304	55	0		109.766	48.3279	0		2.27128
CTTAAGGCCTTTCTTACCCAGAAGCAGGTGGGAGAACTGAAGGATGACGACTTTGAGAAGAT	LKAFLTQKQVGELKDDDFEK	279	55	0		100.739	48.3279	0		2.0845
CTTGAGGCCTTTCTTACCCAGAAGCAAAGAACTGAAGGATGACGACTTTGAGAAGATCAGTG	LEAFLTQKQRTEG*RL*EDQ	21	55	0		7.58252	48.3279	0		0.156898
CTTGAGGACTTTGAGAAGATCAGTGAGAGATCGGAAGAGCACACGTCTGAACTCCAGTCACC	LEDFEKISERSEEHTSELQS	17	55	0		6.13823	48.3279	0		0.127012
CTTGAGGCCTTTCTTACCCAGAAGCAGATCTGAAGGATGACGACTTTGAGAAGATCAGTGAG	LEAFLTQKQI*RMTTLRRSV	16	55	0		5.77716	48.3279	0		0.119541
CTTGAGGCCTTTCTTACCCAGAAGCAGAAGGATGAAGGATGAACTGAAGGATGACGACTTTG	LEAFLTQKQKDEG*TEG*RL	15	55	0		5.41609	48.3279	0		0.11207
CTTGAGGCCTTTCTTACGGAGAACTGAAGGATGACGACTTTGAGAAGATCAGTGAGAGATCG	LEAFLTEN*RMTTLRRSVRD	10	55	0		3.61073	48.3279	0		0.0747131
CTTGAGGCCTTTCTTACCCTTGAGGCCTTTCTTACCCAGAAGCACATGTGGGAGAACTGAAG	LEAFLTLEAFLTQKHMWEN*	0	55	0		0	48.3279	0		0
CTTGAGGCCTTTCTTACCCAGTTCAGGTGGGAGAACTGAAGGATGACGACTTTGAGAAGATC	LEAFLTQFRWEN*RMTTLRR	0	55	0		0	48.3279	0		0
CTTGAGGCCTTTCTTACCCAGAAGCAGGAATGAAGGATGACGACTTTGAGAAGATCAGTGAG	LEAFLTQKQE*RMTTLRRSV	0	55	0		0	48.3279	0		0
CTTGAGGCCTTTCTTACCCAGAACTGGGAGAACTGAAGGATGACGACTTTGAGAAGATCAGT	LEAFLTQNWEN*RMTTLRRS	0	55	0		0	48.3279	0		0
CTTGAGGCCTTTCCTACCCAGAAGCAGAGGTGGGAGAACTGAAGGATGACGACTTTGAGAAG	LEAFPTQKQRWEN*RMTTLR	226	54	0		81.6024	47.4492	0		1.71979
CTTGAGGCCTTTCTTACCCAGAAGGTGGGAGAACTGAAGGACGACGACTTTGAGAAGATCAG	LEAFLTQKVGELKDDDFEKI	158	54	0		57.0495	47.4492	0		1.20233
CTTGAGGCCTTTCTTACCCAGAAGCAGAAAGGTGGGAGAACTGAAGGATGACGACTTTGGGA	LEAFLTQKQKGGRTEG*RLW	129	54	0		46.5784	47.4492	0		0.981648
CTTGAGGCCTTTCTTACCCAGAAGCAGAACTGAAGGATAACGACTTTGAGAAGATCAGTGAG	LEAFLTQKQN*RITTLRRSV	68	54	0		24.5529	47.4492	0		0.517458
CTTGAGGCCTTTCTTACCCAGAAGCAGAACTGAAGGACGACGACTTTGAGAAGATCAGTGAG	LEAFLTQKQN*RTTTLRRSV	68	54	0		24.5529	47.4492	0		0.517458
CTTGAGGCCTTTCATGACGACTTTGAGAAGATCAGTGAGAGATCGGAAGAGCACACGTCTGA	LEAFHDDFEKISERSEEHTS	6	54	0		2.16644	47.4492	0		0.045658
CTTGAGGCCTTTCTTACCCAGAAAAAGGTGGGAGAACTGAAGGATGACGACTTTGAGAAGAT	LEAFLTQKKVGELKDDDFEK	1	54	0		0.361073	47.4492	0		0.00760967
CTTGTGACGACTTTGAGAAGATCAGTGAGAGATCGGAAGAGCACACGTCTGAACTCCAGTCA	LVTTLRRSVRDRKSTRLNSS	0	54	0		0	47.4492	0		0
CTTGAGGCCTTTCTTACCCTTCAGGTGGGAGAACTGAAGGATGACGACTTTGAGAAGATCAG	LEAFLTLQVGELKDDDFEKI	0	54	0		0	47.4492	0		0
CTTGAGGCCTTTCTTACCCAGAAGCAGGTCAACATTAGACAGATCAACGCAACAGAAAGTTA	LEAFLTQKQVNIRQINATES	0	54	0		0	47.4492	0		0
CTTGAGGCCTTTCTTACCCAGAAGCAGGTAAGAAAGTGGGAGAACTGAAGGATGACGACTTT	LEAFLTQKQVRKWEN*RMTT	0	54	0		0	47.4492	0		0
CTTGAGGCCTTTCTTACCCAGAAGCAGAGACTTTGAACCTTCTTGACCTCTCTTTCCTGGGA	LEAFLTQKQRL*TFLTSLSW	0	54	0		0	47.4492	0		0
CTTGAGGCCTTTCTTACCCAGAAGAAGAAGAAGGTGGGAGAACTGAAGGATGACGACTTTGA	LEAFLTQKKKKVGELKDDDF	0	54	0		0	47.4492	0		0
CTTGAGGCCTTTCTTAGCCAGAAGCAGAAGGTGGGAGAACTGAAGGATGACGACTTTGAGAA	LEAFLSQKQKVGELKDDDFE	9	53	148		3.24965	46.5705	53.6348		0.0697793
CTTGAGGCCTTTCTTACCCAGAAGCAGAACTTCTGGTGGGAGAACTGAAGGATGACGACTTT	LEAFLTQKQNFWWEN*RMTT	805	53	0		290.663	46.5705	0		6.24137
CTTGAGGCCTTTCTTACCCAGAAGCAGAAAGGTGGGAGAACTGAAGGATGTCGACTTTGAGA	LEAFLTQKQKGGRTEGCRL*	253	53	0		91.3514	46.5705	0		1.96157
CTTGAGGCCTTTCTTACCCAAAAGCAGAAAGGTGGGAGAACTGAAGGATGACGACTTTGAGA	LEAFLTQKQKGGRTEG*RL*	219	53	0		79.0749	46.5705	0		1.69796
CTTGAGGTCTTTCTTACCCAGAAGCAGAGGTGGGAGAACTGAAGGATGACGACTTTGAGAAG	LEVFLTQKQRWEN*RMTTLR	123	53	0		44.4119	46.5705	0		0.95365
CTTGAGGCCTTTCTTACCCAGAAGCAGAGGTGGGAGAACTGAAGGATGACGATTTTGAGAAG	LEAFLTQKQRWEN*RMTILR	118	53	0		42.6066	46.5705	0		0.914884
CTTGAGGCCTTTCTTACCCAGAAGAAGAGAACTGAAGGATGACGACTTTGAGAAGATCAGTG	LEAFLTQKKRTEG*RL*EDQ	27	53	0		9.74896	46.5705	0		0.209338
CTTGAGGCCAGAACTGAAGGATGACGACTTTGAGAAGATCAGTGAGAGATCGGAAGAGCACA	LEARTEG*RL*EDQ*EIGRA	14	53	0		5.05502	46.5705	0		0.108546
CTTGAGGCCTTTCTTACCCAGAAGCAGAGAAGGGAGAACTGAAGGATGACGACTTTGAGAAG	LEAFLTQKQRREN*RMTTLR	8	53	0		2.88858	46.5705	0		0.062026
CTTGAGGCCTTTCTTACCCAGAAGCTTTCTTACCCAGGTGGGAGAACTGAAGGATGACGACT	LEAFLTQKLSYPGGRTEG*R	1	53	0		0.361073	46.5705	0		0.00775325
CTTGAGGCCTTTCTTACCCAGAAGCAGATCTTAGCCACTTTTTAAAAGAAAAGGGGGGACTG	LEAFLTQKQILATF*KKRGD	1	53	0		0.361073	46.5705	0		0.00775325
CTTGAGGCCTTTCTTACCCAGAAGGATGAACTGAAGGATGACGACTTTGAGAAGATCAGTGA	LEAFLTQKDELKDDDFEKIS	0	53	0		0	46.5705	0		0
CTTGAGGCCTTTCTTACCCAGAAGCAGAAGCTTCTTACCCAGAAGCAGAACTGAAGGATGAC	LEAFLTQKQKLLTQKQN*RM	0	53	0		0	46.5705	0		0
CTTGAGGCCTTTCTTACCCAGAAGAACTGAAGATGGGAGAACTGAAGGATGACGACTTTGAG	LEAFLTQKN*RWEN*RMTTL	0	53	0		0	46.5705	0		0
CTTGAGGCCTTTCTTACCCAGAAAGATGTGGGAGAACTGAAGGATGACGACTTTGAGAAGAT	LEAFLTQKDVGELKDDDFEK	0	53	0		0	46.5705	0		0
CTTGAGGCCTCCCTTGAGGCCTTTCTTACCCAGGTGGGAGAACTGAAGGATGACGACTTTGA	LEASLEAFLTQVGELKDDDF	0	53	0		0	46.5705	0		0
CTTGAGGCAGGATGACGACTTTGAGAAGATCAGTGAGAGATCGGAAGAGCACACGTCTGAAC	LEAG*RL*EDQ*EIGRAHV*	0	53	0		0	46.5705	0		0
CTTGAGGCCTTTCTTACCCAGAAGCAGAGGTGGGAGAGCTGAAGGATGACGACTTTGAGAAG	LEAFLTQKQRWES*RMTTLR	249	52	1		89.9071	45.6918	0.362397		1.96769
CTTGAGGCCTTTCTTACCCAGAAGCTGAAAGGTGGGAGAACTGAAGGATGACGACTTTGAGA	LEAFLTQKLKGGRTEG*RL*	404	52	0		145.873	45.6918	0		3.19255
CTTGAGGCCTTTCTTACCCAGAAGCAGAAAGGTGGGAGAACTGAAGGATGCCGACTTTGAGA	LEAFLTQKQKGGRTEGCRL*	397	52	0		143.346	45.6918	0		3.13723
CTTGAGGCCTTTCTTACCCAGAAGCAGAAAGGTGGGTGAACTGAAGGATGACGACTTTGAGA	LEAFLTQKQKGG*TEG*RL*	253	52	0		91.3514	45.6918	0		1.9993
CTTGAGGCCTTTCTTACCCAGAAGCAGAAAGGTGGGAGAATTGAAGGATGACGACTTTGAGA	LEAFLTQKQKGGRIEG*RL*	223	52	0		80.5192	45.6918	0		1.76222
CTTGAGGCCTTTCTTACCCAGAAGCAGAAAGGTGGGAGAACAGAAGGATGACGACTTTGAGA	LEAFLTQKQKGGRTEG*RL*	208	52	0		75.1031	45.6918	0		1.64369
CTTGGGGCCTTTCTTACCCAGAAGCAGAACTGAAGGATGACGACTTTGAGAAGATCAGTGAG	LGAFLTQKQN*RMTTLRRSV	100	52	0		36.1073	45.6918	0		0.790235
CTTGAGGCTTTTCTTACCCAGAAGCAGAGGTGGGAGAACTGAAGGATGACGACTTTGAGAAG	LEAFLTQKQRWEN*RMTTLR	78	52	0		28.1637	45.6918	0		0.616383
CTTGAGGCCTTTCTTACCCAGAAGCAGAGAACTGAAGGACGACGACTTTGAGAAGATCAGTG	LEAFLTQKQRTEGRRL*EDQ	73	52	0		26.3583	45.6918	0		0.576872
CTTGAGGCCTTTCTTACCCAGAAGCAGAGAAGTGGGAGAACTGAAGGATGACGACTTTGAGA	LEAFLTQKQRSGRTEG*RL*	43	52	0		15.5261	45.6918	0		0.339801
CTTGAGGCCTTTCTTACCCAGAAGCAAAGTGGGAGAACTGAAGGATGACGACTTTGAGAAGA	LEAFLTQKQSGRTEG*RL*E	27	52	0		9.74896	45.6918	0		0.213364
CTTGAGGCCTTTCTTACCCAGAAGCAGAAAACTGAAGGATGACGACTTTGAGAAGATCAGTG	LEAFLTQKQKTEG*RL*EDQ	26	52	0		9.38789	45.6918	0		0.205461
CTTGAGGCCTTTCTTAACCAGAAGCAGAGGTGGGAGAACTGAAGGATGACGACTTTGAGAAG	LEAFLNQKQRWEN*RMTTLR	23	52	0		8.30467	45.6918	0		0.181754
CTTGAGGCCTTTCTTGGATGACGACTTTGAGAAGATCAGTGAGAGATCGGAAGAGCACACGT	LEAFLG*RL*EDQ*EIGRAH	7	52	0		2.52751	45.6918	0		0.0553165
CTTGAGGCCTTTCTTACCCAGAAGCTTCTGGGGAGAACTGAAGGATGACGACTTTGAGAAGA	LEAFLTQKLLGRTEG*RL*E	3	52	0		1.08322	45.6918	0		0.0237071
CTTGAGGCCTTTCTTACCCAGAAGCAGGATGGCGACTTTGAGAAGATCAGTGAGAGATCGGA	LEAFLTQKQDGDFEKISERS	1	52	0		0.361073	45.6918	0		0.00790235
CTTGAGGGTGACGACTTTGAGAAGATCAGTGAGAGATCGGAAGAGCACACGTCTGAACTCCA	LEGDDFEKISERSEEHTSEL	0	52	0		0	45.6918	0		0
CTTGAGGGATTTTTTTAGAAGTTCAACCTTACTACGTAAAAAAAAGAAGGTGGGAGAACTGA	LEGFF*KFNLTT*KKEGGRT	0	52	0		0	45.6918	0		0
CTTGAGGCCTTTCTTACCGATGACGACTTTGAGAAGATCAGTGAGAGATCGGAAGAGCACAC	LEAFLTDDDFEKISERSEEH	0	52	0		0	45.6918	0		0
CTTGAGGCCTTTCTTACCCAGAAGCAGCTTCTTCTGCAAGAACTGAAGGATGACGACTTTGA	LEAFLTQKQLLLQELKDDDF	0	52	0		0	45.6918	0		0
CTTGAGGCCTTTCTTACCCAGAAGCAGAACTTTGAGAAGATCAGTGAGAGATCGGAAGAGCA	LEAFLTQKQNFEKISERSEE	0	52	0		0	45.6918	0		0
CTTGAGGCCTTTCTTACCCAGAAGCAGAAAGCAGTTTCTGCTTCAGGTGGGAGAACTGAAGG	LEAFLTQKQKAVSASGGRTE	0	52	0		0	45.6918	0		0
CTTGAGGCCTTTCTTACCCAGAAGCAACTGAAGGAGAACTGAAGGATGACGACTTTGAGAAG	LEAFLTQKQLKEN*RMTTLR	0	52	0		0	45.6918	0		0
CTTGAGGCCTTTCTTACCCAGAAGAAAGGTAAGAACTGAAGGTGGGAGAACTGAAGGATGAC	LEAFLTQKKGKN*RWEN*RM	0	52	0		0	45.6918	0		0
CTTGAGGAAGGTGGGAGAACTGAAGGATGACGACTTTGAGAAGATCAGTGAGAGATCGGAAG	LEEGGRTEG*RL*EDQ*EIG	0	52	0		0	45.6918	0		0
CAGAACTGAAGGATGACGACTTTGAGAAGATCAGTGAGAGATCGGAAGAGCACACGTCTGAA	QN*RMTTLRRSVRDRKSTRL	0	52	0		0	45.6918	0		0
CTTGAGGCCTTTCTTACCCAGAAGCAGAAGGTGGGAGAACTTAAGGATGACGACTTTGAGAA	LEAFLTQKQKVGELKDDDFE	30	51	423		10.8322	44.8131	153.294		0.241719
CTTGAGGCCTTTCGTACCCAGAAGCAGAAGGTGGGAGAACTGAAGGATGACGACTTTGAGAA	LEAFRTQKQKVGELKDDDFE	7	51	199		2.52751	44.8131	72.1171		0.0564011
CTTGAGGCCTTTCTTACCCAGAAGCAGAGAACTGAAGGATGACGACTTTGAGAGATCAGTGA	LEAFLTQKQRTEG*RL*EIS	126	51	0		45.4951	44.8131	0		1.01522
CTTGAGGCCTTTCTTACCCAGAAGCAGAGAACTGAAGGATGGCGACTTTGAGAAGATCAGTG	LEAFLTQKQRTEGWRL*EDQ	74	51	0		26.7194	44.8131	0		0.59624
CTTGAGGCCTTTCTTACCCAGAAGCAGAAGGACTGAAGGATGACGACTTTGAGAAGATCAGT	LEAFLTQKQKD*RMTTLRRS	65	51	0		23.4697	44.8131	0		0.523725
CTTGAGGCCTTTCTTACCCAGGAGCAGAACTGAAGGATGACGACTTTGAGAAGATCAGTGAG	LEAFLTQEQN*RMTTLRRSV	61	51	0		22.0254	44.8131	0		0.491495
CTTGAGGCCTTTCTTACCCAGAAGCAGAACTGAAGGGTGACGACTTTGAGAAGATCAGTGAG	LEAFLTQKQN*RVTTLRRSV	59	51	0		21.3033	44.8131	0		0.475381
CTTGAGGCCTTTCTTACCCAGAAGCAGTAAGAGGTGGGAGAACTGAAGGATGACGACTTTGA	LEAFLTQKQ*EVGELKDDDF	1	51	0		0.361073	44.8131	0		0.0080573
CTTGAGGCTTCTGGGTTCTGGGTTCCTTCAGTTCATCCTGAACTGAAGGATGACGACTTTGA	LEASGFWVPSVHPELKDDDF	0	51	0		0	44.8131	0		0
CTTGAGGCCTTTCTTACCCAGAAGCTTCTGATGACGACTTTGAGAAGATCAGTGAGAGATCG	LEAFLTQKLLMTTLRRSVRD	0	51	0		0	44.8131	0		0
CTTGAGGCCTTTCTTACCCAGAAGCAGTGGGAACTGCTTACCCAGAAGGTGGGAGAACTGAA	LEAFLTQKQWELLTQKVGEL	0	51	0		0	44.8131	0		0
CTTGAGGCCTTTCTTACCCAGAAGCAGAGAACTGAAGATGACGACTTTGAGAAGATCAGTGA	LEAFLTQKQRTEDDDFEKIS	0	51	0		0	44.8131	0		0
CTTGAGGCCTTTCTTACCCAGAAGCAGAAAGAAGCAGGTGGGAGAACTGAAGGATGACGACT	LEAFLTQKQKEAGGRTEG*R	0	51	0		0	44.8131	0		0
CTTGAGGCCTTCCTTTCTTACCAGAAGGTGGGAGAACTGAAGGATGACGACTTTGAGAAGAT	LEAFLSYQKVGELKDDDFEK	0	51	0		0	44.8131	0		0
CTTGAGGCCTTTCTTACCCAGAACTGAAGGATGACGACTTTGAGAGATCAGTGAGAGATCGG	LEAFLTQN*RMTTLRDQ*EI	692	50	0		249.862	43.9344	0		5.68716
CTTGAGGCCTTTCTCACCCAGAACTGAAGGATGACGACTTTGAGAAGATCAGTGAGAGATCG	LEAFLTQN*RMTTLRRSVRD	222	50	0		80.1581	43.9344	0		1.8245
CTTGAGGCCTTTTTTACCCAGAAGCAGGTGGGAGAACTGAAGGATGACGACTTTGAGAAGAT	LEAFFTQKQVGELKDDDFEK	117	50	0		42.2455	43.9344	0		0.961558
CTTGAGGCCTTTCTTACCCAGAGGCAGAGAACTGAAGGATGACGACTTTGAGAAGATCAGTG	LEAFLTQRQRTEG*RL*EDQ	91	50	0		32.8576	43.9344	0		0.747879
CTTGAGGCCTTTCTTACCCAGAAGGATAAGGTGGGAGAACTGAAGGATGACGACTTTGAGAA	LEAFLTQKDKVGELKDDDFE	28	50	0		10.11	43.9344	0		0.230116
CTTGAGGCCTTTCTTACCCAGAAGCAGTGACGACTTTGAGAAGATCAGTGAGAGATCGGAAG	LEAFLTQKQ*RL*EDQ*EIG	23	50	0		8.30467	43.9344	0		0.189024
CTTGAGGCCTTTCTTACCCAGAGAGAACTGAAGGATGACGACTTTGAGAAGATCAGTGAGAG	LEAFLTQRELKDDDFEKISE	9	50	0		3.24965	43.9344	0		0.073966
CTTGAGGCCTTTCTTACCCAGAAGCAGAAGGTAAGAAGCAGAAGGTGGGAGAACTGAAGGAT	LEAFLTQKQKVRSRRWEN*R	6	50	0		2.16644	43.9344	0		0.0493107
CTTGAGGCCTTTCTTTCTTGAGGTGGGAGAACTGAAGGATGACGACTTTGAGAAGATCAGTG	LEAFLS*GGRTEG*RL*EDQ	0	50	0		0	43.9344	0		0
CTTGAGGCCTTTCTTACCCAGAAGCATGTTGGTGATAGTCATCCCGGGTGGCTGGAGTGAAG	LEAFLTQKHVGDSHPGWLE*	0	50	0		0	43.9344	0		0
CTTGAGGCCTTTCTTACCCAGAAGCAGAACTAGCAGGTGGGAGAACTGAAGGATGACGACTT	LEAFLTQKQN*QVGELKDDD	0	50	0		0	43.9344	0		0
CTTGAGGCCTTTCTTACCCAGAAGCAGAAACTGGTGGGAGAACTGAAGGATGACGACTTTGA	LEAFLTQKQKLVGELKDDDF	0	50	0		0	43.9344	0		0
CTTGAGGCCTTTCTTACCCAGAAGAGAAAGGGAGAACTGAAGGATGACGACTTTGAGAAGAT	LEAFLTQKRKGELKDDDFEK	0	50	0		0	43.9344	0		0
CTTGAGGCCTTTCTTACCCAGAAGCAGAAGGTGGGAGAACTGAAGCATGACGACTTTGAGAA	LEAFLTQKQKVGELKHDDFE	5	49	385		1.80536	43.0557	139.523		0.0419308
CTTGAGGCCTTTCTTACCCAGCAGCAGAGGTGGGAGAACTGAAGGATGACGACTTTGAGAAG	LEAFLTQQQRWEN*RMTTLR	346	49	0		124.931	43.0557	0		2.90161
CTTGAGGCCTTTCTTACCCAGAAGCAGAGAACTGAAGGATGACGACTTTGAGAAGATCATGA	LEAFLTQKQRTEG*RL*EDH	97	49	0		35.024	43.0557	0		0.813458
CTTGAGGCCTTTCTTACCCAGAAGCAAGAAGGTGGGAGAACTGAAGGATGACGACTTTGAGA	LEAFLTQKQEGGRTEG*RL*	41	49	0		14.804	43.0557	0		0.343833
CTTGAGGCCTTTCTTACCCAGAAGCAGATGGGTGGGAGAACTGAAGGATGACGACTTTGAGA	LEAFLTQKQMGGRTEG*RL*	6	49	0		2.16644	43.0557	0		0.050317
CTTGAGGCCTTTCTTACCCAGAAGCAAGGCGGGAGAACTGAAGGATGACGACTTTGAGAAGA	LEAFLTQKQGGRTEG*RL*E	5	49	0		1.80536	43.0557	0		0.0419308
CTTGAGAAGGATGACGACTTTGAGAAGATCAGTGAGAGATCGGAAGAGCACACGTCTGAACT	LEKDDDFEKISERSEEHTSE	4	49	0		1.44429	43.0557	0		0.0335447
CTTGAGGCCTTTCTTACCCAGAAGCAGAACTGAGAACTGAAGGATGACGACTTTGAGAAGAT	LEAFLTQKQN*ELKDDDFEK	1	49	0		0.361073	43.0557	0		0.00838617
CTTGAGGCGAGAACTGAAGGATGACGACTTTGAGAAGATCAGTGAGAGATCGGAAGAGCACA	LEARTEG*RL*EDQ*EIGRA	0	49	0		0	43.0557	0		0
CTTGAGGCCTTTCTTACCCAGAAGTAAAGGAGAACTGAAGGATGACGACTTTGAGAAGATCA	LEAFLTQK*RRTEG*RL*ED	0	49	0		0	43.0557	0		0
CTTGAGGCCTTTCTTACCCAGAAGCTTGACGACTTTGAGAAGATCAGTGAGAGATCGGAAGA	LEAFLTQKLDDFEKISERSE	0	49	0		0	43.0557	0		0
CTTGAGGCCTTTCTTACCCAGAAGCAGTTCTTTTACCAGGTGGGAGAACTGAAGGATGACGA	LEAFLTQKQFFYQVGELKDD	0	49	0		0	43.0557	0		0
CTTGAGGCCTTTCTTACCCAGAAGCAGAAGGATAACTTACCCAGAGGCCTTTCTTACCCAGA	LEAFLTQKQKDNLPRGLSYP	0	49	0		0	43.0557	0		0
CTTGAGGCCTTTCTTACCCAGAAGCAGAACTGACGACTTTGAGAAGATCAGTGAGAGATCGG	LEAFLTQKQN*RL*EDQ*EI	0	49	0		0	43.0557	0		0
CTTGAGGCCTTTCTTACCCAGAAGCACGAAGGATGACGACTTTGAGAAGATCAGTGAGAGAT	LEAFLTQKHEG*RL*EDQ*E	0	49	0		0	43.0557	0		0
CTTGAGGCCTTTCTTACCCAGAACTGCTCCTCCAACTGAAGGATGACGACTTTGAGAAGATC	LEAFLTQNCSSN*RMTTLRR	0	49	0		0	43.0557	0		0
CTTGAGGCCTTTCTTACCCAGAAGCAGAAGGAGGGAGAAATGAAGGATGACGACTTTGAGAA	LEAFLTQKQKEGEMKDDDFE	7	48	36		2.52751	42.177	13.0463		0.0599262
CTTGAGGCCTTTCTTCCCCAGAAGCAGAAGGTGGGAGACCTGAAGGATGACGACTTTGAGAA	LEAFLPQKQKVGDLKDDDFE	0	48	18		0	42.177	6.52315		0
CTTGCGGCCTTTCTTACCCAGAAGCAGGTGGGAGAACTGAAGGATGACGACTTTGAGAAGAT	LAAFLTQKQVGELKDDDFEK	1382	48	0		499.002	42.177	0		11.8311
CTTGAGGCCTTTCTTACCCAGAACTGAAGGATGACGACTTTGAGAAATCAGTGAGAGATCGG	LEAFLTQN*RMTTLRNQ*EI	636	48	0		229.642	42.177	0		5.44472
CTTGAGGCCTTTCTTACCCCGAAGCAGAAAGGTGGGAGAACTGAAGGATGACGACTTTGAGA	LEAFLTPKQKGGRTEG*RL*	303	48	0		109.405	42.177	0		2.59395
CTTGAGGCCTTTCTTACCCAGAAGCAGGTGGGAGAACTGATGGATGACGACTTTGAGAAGAT	LEAFLTQKQVGELMDDDFEK	172	48	0		62.1045	42.177	0		1.47247
CCTGAGGCCTTTCTTACCCAGAAGGTGGGAGAACTGAAGGATGACGACTTTGAGAAGATCAG	PEAFLTQKVGELKDDDFEKI	141	48	0		50.9112	42.177	0		1.20708
CTTGAGGCCTTTCTTACCCGGAAGCAGAACTGAAGGATGACGACTTTGAGAAGATCAGTGAG	LEAFLTRKQN*RMTTLRRSV	59	48	0		21.3033	42.177	0		0.505092
CTTGAGGCCTTTCTCACCCAGAAGCAGAACTGAAGGATGACGACTTTGAGAAGATCAGTGAG	LEAFLTQKQN*RMTTLRRSV	42	48	0		15.165	42.177	0		0.359557
TTTCTTACTGAAGGATGACGACTTTGAGAAGATCAGTGAGAGATCGGAAGAGCACACGTCTG	FLTEG*RL*EDQ*EIGRAHV	0	48	0		0	42.177	0		0
CTTGAGGCCTTTCTTACCCAGAAGCAGAACTTCTGTGGGAGAACTGAAGGATGACGACTTTG	LEAFLTQKQNFCGRTEG*RL	0	48	0		0	42.177	0		0
CTTGAGGCCTTTCTTACCCAGAAGAGGTAAAGCAGGTGGGAGAACTGAAGGATGACGACTTT	LEAFLTQKR*SRWEN*RMTT	0	48	0		0	42.177	0		0
CTTGAGGCCTTTCTTACCCAGAAGCAGAAGGTCGGAGAACTGAAGGATGACGACTTTGAGAA	LEAFLTQKQKVGELKDDDFE	0	47	102		0	41.2983	36.9645		0
CTTGAGGCCTTTCTTACCCAGAAGCAGCGGTGGGAGAACTGAAGGATGACGACTTTGAGAAG	LEAFLTQKQRWEN*RMTTLR	248	47	1		89.546	41.2983	0.362397		2.16827
CTTGAGGCCTTTCTTACCCAGAAGCAGAAAGGTGGGAGAAATGAAGGATGACGACTTTGAGA	LEAFLTQKQKGGRNEG*RL*	194	47	0		70.0481	41.2983	0		1.69615
CTTGAGGCCTTTCTTACCCAGAAGGTGGGAGAACTGAAGGGTGACGACTTTGAGAAGATCAG	LEAFLTQKVGELKGDDFEKI	157	47	0		56.6884	41.2983	0		1.37266
CTTGAGGCCTTTTTTACCCAGAAGCAGAAAGGTGGGAGAACTGAAGGATGACGACTTTGAGA	LEAFFTQKQKGGRTEG*RL*	137	47	0		49.4669	41.2983	0		1.19779
CTTGAGGCCTTTCTTACCCAGAAGCAGGTGGGAGAACTGAAGGATGAAGACTTTGAGAAGAT	LEAFLTQKQVGELKDEDFEK	133	47	0		48.0227	41.2983	0		1.16282
CTTGAGGCCTTTCTTACCCAGAAGCAGAAAGGTGGGAGAACTGAAGGATGACGACTTTAGAA	LEAFLTQKQKGGRTEG*RL*	114	47	0		41.1623	41.2983	0		0.996705
CTTGAGGCCTTTCTTACCCAGAAGCAGGTGGGAGAACTGAAGGATGACGACTTTGGGAAGAT	LEAFLTQKQVGELKDDDFGK	113	47	0		40.8012	41.2983	0		0.987962
CTTGAGGTCTTTCTTACCCAGAAGCAGAACTGAAGGATGACGACTTTGAGAAGATCAGTGAG	LEVFLTQKQN*RMTTLRRSV	61	47	0		22.0254	41.2983	0		0.533325
CTTGAGGCCTTTCTTACAACTGAAGGATGACGACTTTGAGAAGATCAGTGAGAGATCGGAAG	LEAFLTTEG*RL*EDQ*EIG	43	47	0		15.5261	41.2983	0		0.37595
CTTGAGGCCTTTCTTACCCAGTTCTCAGTGGGAGAACTGAAGGATGACGACTTTGAGAAGAT	LEAFLTQFSVGELKDDDFEK	11	47	0		3.9718	41.2983	0		0.0961733
CTTGAGGCCTTTCTTCCCCAGAAGCAGAAAGGTGGGAGCACTGAAGGATGACGACTTTGAGA	LEAFLPQKQKGGSTEG*RL*	3	47	0		1.08322	41.2983	0		0.0262291
CTTGAGGCCTTTCTTACCCAGAAGGTAAGGTGGGAGAACTGAAGGATGACGACTTTGAGAAG	LEAFLTQKVRWEN*RMTTLR	2	47	0		0.722145	41.2983	0		0.0174861
CTTGAGGCCTTTCTTACTTCAGGGAGAACTGAAGGATGACGACTTTGAGAAGATCAGTGAGA	LEAFLTSGRTEG*RL*EDQ*	0	47	0		0	41.2983	0		0
CTTGAGGCCTTTCTTACCCAGAAGCAGATGAGCACATTGTTTGCTGGATACTGTGTGAAGGA	LEAFLTQKQMSTLFAGYCVK	0	47	0		0	41.2983	0		0
CTTGAGGCCTTTCTTACCCAGAACTCCGGGAGAACTGAAGGATGACGACTTTGAGAAGATCA	LEAFLTQNSGRTEG*RL*ED	0	47	0		0	41.2983	0		0
CTTGAGGCCTTTCTGGAGAACTGAAGGATGACGACTTTGAGAAGATCAGTGAGAGATCGGAA	LEAFLEN*RMTTLRRSVRDR	0	47	0		0	41.2983	0		0
CTTGAGGCCTTTCTTACCCAGAAGCAGAAGCTGGGAGAACTGAAGGATGACGACTTTGAGAA	LEAFLTQKQKLGELKDDDFE	9	46	232		3.24965	40.4197	84.0762		0.0803978
CTTGAGGCCTTTCTTACCCAGAAGCAGAAGGTGGGAGAACTGAAGGATGACGTCTTTGAGAA	LEAFLTQKQKVGELKDDVFE	13	46	155		4.69394	40.4197	56.1716		0.11613
CTTGAGGCCTTTCTTACCCAGAACTGAAGGATGACGACTTTGAAAGATCAGTGAGAGATCGG	LEAFLTQN*RMTTLKDQ*EI	579	46	0		209.061	40.4197	0		5.17226
CTTGAGGCCTTTCTTACCCAGGTGGGGGAACTGAAGGATGACGACTTTGAGAAGATCAGTGA	LEAFLTQVGELKDDDFEKIS	259	46	0		93.5178	40.4197	0		2.31367
CTTGAGGCCTTTCTTACCCAGAAGCAGGTGGGAGAACTGAAGGATGACGACTTTGAGAATCA	LEAFLTQKQVGELKDDDFEN	145	46	0		52.3555	40.4197	0		1.2953
CTTGAGGCCTTTCTTACCCAAAAGCAGGTGGGAGAACTGAAGGATGACGACTTTGAGAAGAT	LEAFLTQKQVGELKDDDFEK	143	46	0		51.6334	40.4197	0		1.27743
CTTGAGGCCTCTCTTACCCAGAAGGTGGGAGAACTGAAGGATGACGACTTTGAGAAGATCAG	LEASLTQKVGELKDDDFEKI	116	46	0		41.8844	40.4197	0		1.03624
CTTGAGGCCTTTCTTACCCAGAAGGTGGGAGAACTGAAGGATGACGACTTTGAGAAGATAAG	LEAFLTQKVGELKDDDFEKI	109	46	0		39.3569	40.4197	0		0.973707
CTTGAGGCCTCTCTTACCCAGGTGGGAGAACTGAAGGATGACGACTTTGAGAAGATCAGTGA	LEASLTQVGELKDDDFEKIS	100	46	0		36.1073	40.4197	0		0.893309
CTTGAGGCCTTTCTTACCCAGAAGGTGAGAGAACTGAAGGATGACGACTTTGAGAAGATCAG	LEAFLTQKVRELKDDDFEKI	70	46	0		25.2751	40.4197	0		0.625317
CTTGAGCCCTTTCTTACCCAGAAGCAGGTGGGAGAACTGAAGGATGACGACTTTGAGAAGAT	LEPFLTQKQVGELKDDDFEK	47	46	0		16.9704	40.4197	0		0.419855
CTTGAGGCCTTAAGGATGACGACTTTGAGAAGATCAGTGAGAGATCGGAAGAGCACACGTCT	LEALRMTTLRRSVRDRKSTR	4	46	0		1.44429	40.4197	0		0.0357324
CTTGAGGCCTTTCTTACCCAGAAGCAGAAAGAAAGGTGGGAGAACTGAAGGATGACGACTTT	LEAFLTQKQKERWEN*RMTT	2	46	0		0.722145	40.4197	0		0.0178662
CTTGAGGCCTTTCTTACCCAGAAGCGAGAGAAAGTGGGAGGGGATCGGAGCCTACCTGCTGG	LEAFLTQKREKVGGDRSLPA	0	46	0		0	40.4197	0		0
CTTGAGGCCTTTCTTACCCAGAAGCAGTTGCCTCCCTTGAAAGTATTGAGCTTTTTGAAGAT	LEAFLTQKQLPPLKVLSFLK	0	46	0		0	40.4197	0		0
CTTGAGGCCTTTCTTACCCAGAAGCAGCTTGTGGGAGAACTGAAGGATGACGACTTTGAGAA	LEAFLTQKQLVGELKDDDFE	0	46	0		0	40.4197	0		0
CTTGAGGCCTTTCTTACCCAGAAGCACTTTGAGAAGATCGACTTTGAGAAGATCAGTGAGAG	LEAFLTQKHFEKIDFEKISE	0	46	0		0	40.4197	0		0
CTTGAGGCCTTTCTTACCCAGAAGAAAGGGTAGAACTGAAGGATGACGACTTTGAGAAGATC	LEAFLTQKKG*N*RMTTLRR	0	46	0		0	40.4197	0		0
CTTGAGGCCTTTCTTACCAAGAAGCAGAAGGTGGGAGAACTGAAGGATGCCGACTTTGAGAA	LEAFLTKKQKVGELKDADFE	0	45	7		0	39.541	2.53678		0
CTTGAGGCCTTTCTTACCCAGAAGCAGGTGGGAGAACTGAAGGATGACGACTTTGCGAAGAT	LEAFLTQKQVGELKDDDFAK	126	45	0		45.4951	39.541	0		1.15058
CTTGAGGCCTTTCTTACCTGGGAGAACTGAAGGATGACGACTTTGAGAAGATCAGTGAGAGA	LEAFLTWEN*RMTTLRRSVR	72	45	0		25.9972	39.541	0		0.657476
CTTGAGGCCTTTCTTACCCAGAAGCAGAACTGAAGGATGACGACTTTGATAAGATCAGTGAG	LEAFLTQKQN*RMTTLIRSV	44	45	0		15.8872	39.541	0		0.401791
CTTGAGGCCTTTCTTACCCAGAAGCAGAACTTAAGGATGACGACTTTGAGAAGATCAGTGAG	LEAFLTQKQNLRMTTLRRSV	18	45	0		6.49931	39.541	0		0.164369
CTTGAGGCCTTTCTTACCCAGAAGGATGACGACTTTGAGAAGATCAGTGAGAGATCGGAGAG	LEAFLTQKDDDFEKISERSE	6	45	0		2.16644	39.541	0		0.0547896
CTTGAGGCCTTTCTTACCCAGAAGCAGAGAAAGGTGGGAGAACTGAAGGATGACGACTTTGA	LEAFLTQKQRKVGELKDDDF	1	45	0		0.361073	39.541	0		0.00913161
CTTGAGGCCTTTCTTACCCAGAAGTTCTGGTGGGAGAACTGAAGGATGACGACTTTGAGAAG	LEAFLTQKFWWEN*RMTTLR	0	45	0		0	39.541	0		0
CTTGAGGCCTTTCTTACCCAGAAGCAGTGGTGAGGATGACGACTTTGAGAAGATCAGTGAGA	LEAFLTQKQW*G*RL*EDQ*	0	45	0		0	39.541	0		0
CTTGAGGCCTTTCTTACCCAGAAGCAGAGAGAACTGAAGATGACGACTTTGAGAAGATCAGT	LEAFLTQKQRELKMTTLRRS	0	45	0		0	39.541	0		0
CTTGAGGCCTTTCTTACCCAGAAGCAGAAACTGAAGGTGGGAGAACTGAAGGATGACGACTT	LEAFLTQKQKLKVGELKDDD	0	45	0		0	39.541	0		0
CTTGAGGCCATTCTGAAGGATGACGACTTTGAGAAGATCAGTGAGAGATCGGAAGAGCACAC	LEAILKDDDFEKISERSEEH	0	45	0		0	39.541	0		0
CTTGAGGCCTTTCTTACCCAGAAGCACAAGGTGGGAGAACTGAAGGATGACGACTTTGAGAA	LEAFLTQKHKVGELKDDDFE	2	44	65		0.722145	38.6623	23.5558		0.0186783
CTTGAGGCCTTTCTTCCCAAGAAGCAGAAGGTGGGAGAACTGAAGGATGCCGACTTTGAGAA	LEAFLPKKQKVGELKDADFE	0	44	3		0	38.6623	1.08719		0
CTTGAGGCCTTTCTTACCCAGTAGCAGAAAGGTGGGAGAACTGAAGGATGACGACTTTGAGA	LEAFLTQ*QKGGRTEG*RL*	142	44	1		51.2723	38.6623	0.362397		1.32616
CTTGAGGCCTTTCTTACCCAGAACTGAAGGATGACGAATTTGAGAAGATCAGTGAGAGATCG	LEAFLTQN*RMTNLRRSVRD	830	44	0		299.69	38.6623	0		7.75149
CTTGAGGCCTTTCTTACCCAGAAGCAGGTGGGAGAACTGAAGGCTGACGACTTTGAGAAGAT	LEAFLTQKQVGELKADDFEK	293	44	0		105.794	38.6623	0		2.73637
CTTGAAGCCTTTCTTACCCAGAAGCAGGTGGGAGAACTGAAGGATGACGACTTTGAGAAGAT	LEAFLTQKQVGELKDDDFEK	247	44	0		89.1849	38.6623	0		2.30677
CTTGAGGCCTTTCTTACCCAGAAGAAACTGAAGGATGACGACTTTGAGAAGATCAGTGAGAG	LEAFLTQKKLKDDDFEKISE	140	44	0		50.5502	38.6623	0		1.30748
CTTGAGGCCTTTCTTACCCAGAAGCGAGAACTGAAGGATGACGACTTTGAGAAGATCAGTGA	LEAFLTQKRELKDDDFEKIS	19	44	0		6.86038	38.6623	0		0.177444
CTTGAGGCCTTTCTTACCCAGAAGCAGAGATGACGACTTTGAGAAGATCAGTGAGAGATCGG	LEAFLTQKQR*RL*EDQ*EI	16	44	0		5.77716	38.6623	0		0.149426
CTTGAGGCCTTTCTTACCCGGATGACGACTTTGAGAAGATCAGTGAGAGATCGGAAGAGCAC	LEAFLTRMTTLRRSVRDRKS	9	44	0		3.24965	38.6623	0		0.0840523
CTTGAGGCCTTTCTTACCCATTTAACAAGGTGGGAGAACTGAAGGATGACGACTTTGAGAAG	LEAFLTHLTRWEN*RMTTLR	0	44	0		0	38.6623	0		0
CTTGAGGCCTTTCTTACCCAGAAGCATGACGACTTTGGGAGAACTGAAGGATGACGACTTTG	LEAFLTQKHDDFGRTEG*RL	0	44	0		0	38.6623	0		0
CTTGAGGCCTTTCTTACCCAGAAGCAGTAGAAGAACCTGCTTCAGTTCTACCCAGTGGGAGA	LEAFLTQKQ*KNLLQFYPVG	0	44	0		0	38.6623	0		0
CTTGAGGCCTTTCTTACCCAGAAGCAGGGACTGAAGCAGGTGGGAGAACTGAAGGATGACGA	LEAFLTQKQGLKQVGELKDD	0	44	0		0	38.6623	0		0
CTTGAGGCCTTTCTTACCCAGAAGCAGAAAGCCTCCAAGAGAACTGAAGGATGACGACTTTG	LEAFLTQKQKASKRTEG*RL	0	44	0		0	38.6623	0		0
CTTGAGGCCTTTCTTACCCAGAAGCAGAAACTTCTGAAGGATGACGACTTTGAGAAGATCAG	LEAFLTQKQKLLKDDDFEKI	0	44	0		0	38.6623	0		0
CTTGAGGCCTTTCTTACCCAGAAGCAGAAAACTCAAAAAGGGCAAATTCCAAGGAGAATTAC	LEAFLTQKQKTQKGQIPRRI	0	44	0		0	38.6623	0		0
CTTGAGGCCTTTCTTACCCAGAAGCACCTGGGAGAACTGAAGGATGACGACTTTGAGAAGAT	LEAFLTQKHLGELKDDDFEK	0	44	0		0	38.6623	0		0
CTTGAGGCCTTTCTTACAAGAACTGAAGGATGACGACTTTGAGAAGATCAGTGAGAGATCGG	LEAFLTRTEG*RL*EDQ*EI	0	44	0		0	38.6623	0		0
CTTGAGGCCTTTCTTACCCAGAAGCAGAAGGTGGGAGAACTGAAGGATGCCGCCTTTGAGAA	LEAFLTQKQKVGELKDAAFE	1	43	38		0.361073	37.7836	13.7711		0.00955633
CTTGAGGCCTTTCTTACCCAGAAGCAGGTGGGAGAACTGAAGGATGACGACTTTGATAAGAT	LEAFLTQKQVGELKDDDFDK	213	43	1		76.9085	37.7836	0.362397		2.0355
CTTGAGGCCTTTCTTACCCAGAAGCAGAAAGGTGGGATAACTGAAGGATGACGACTTTGAGA	LEAFLTQKQKGGITEG*RL*	391	43	0		141.179	37.7836	0		3.73653
CTTGAGGCCTTTCTTACCCAGAAGCAGTAAGGATGACGACTTTGAGAAGATCAGTGAGAGAT	LEAFLTQKQ*G*RL*EDQ*E	248	43	0		89.546	37.7836	0		2.36997
CTTGAGGCCTTTCTTACCCAGAAGCAGAAAGGTGTGAGAACTGAAGGATGACGACTTTGAGA	LEAFLTQKQKGVRTEG*RL*	187	43	0		67.5206	37.7836	0		1.78703
CTTGAGGCCTTTCTTTCAGTGGGAGAACTGAAGGATGACGACTTTGAGAAGATCAGTGAGAG	LEAFLSVGELKDDDFEKISE	167	43	0		60.2991	37.7836	0		1.59591
CTTGAGGCCTTTCTTACCCAGCAGCAGAACTGAAGGATGACGACTTTGAGAAGATCAGTGAG	LEAFLTQQQN*RMTTLRRSV	141	43	0		50.9112	37.7836	0		1.34744
CTTGAGGCCATTCTTACCCAGAAGCAGAAAGGTGGGAGAACTGAAGGATGACGACTTTGAGA	LEAILTQKQKGGRTEG*RL*	118	43	0		42.6066	37.7836	0		1.12765
CTTGAGAAGGTGGGAGAACTGAAGGATGACGACTTTGAGAAGATCAGTGAGAGATCGGAAGA	LEKVGELKDDDFEKISERSE	52	43	0		18.7758	37.7836	0		0.496929
CTTGAGGCCTTTCTTACCCAGAAGCAGAGCACTGAAGGATGACGACTTTGAGAAGATCAGTG	LEAFLTQKQSTEG*RL*EDQ	33	43	0		11.9154	37.7836	0		0.315359
CTTGAGGCCTTTCTTACCCAGAAGCAGAGTAGGAGAACTGAAGGATGACGACTTTGAGAAGA	LEAFLTQKQSRRTEG*RL*E	13	43	0		4.69394	37.7836	0		0.124232
CTTGAGGCCTTGAGGCCTTTCTTACCCAGAAGCAGGTGGGAGAACTGAAGGATGACGACTTT	LEALRPFLPRSRWEN*RMTT	13	43	0		4.69394	37.7836	0		0.124232
CTTGAGGACTGAAGGATGACGACTTTGAGAAGATCAGTGAGAGATCGGAAGAGCACACGTCT	LED*RMTTLRRSVRDRKSTR	13	43	0		4.69394	37.7836	0		0.124232
CTTGAGGCCTTTCTTACCCAGAAGCAGAAGAAGCAGAAGAAGGTGGGAGAACTGAAGGATGA	LEAFLTQKQKKQKKVGELKD	11	43	0		3.9718	37.7836	0		0.10512
CTTGAGGCCTTTCTTACCCAGAAGCTTCTGGAGAACTGAAGGATGACGACTTTGAGAAGATC	LEAFLTQKLLEN*RMTTLRR	1	43	0		0.361073	37.7836	0		0.00955633
CTTGAGGCCTTTCTTACCTTAGGTGGGAGAACTGAAGGATGACGACTTTGAGAAGATCAGTG	LEAFLTLGGRTEG*RL*EDQ	0	43	0		0	37.7836	0		0
CTTGAGGCCTTTCTTACCCAGTGAAGGATGACGACTTTGAGAAGATCAGTGAGAGATCGGAA	LEAFLTQ*RMTTLRRSVRDR	0	43	0		0	37.7836	0		0
CTTGAGGCCTTTCTTACCCAGAAGCAGTTCTCCCACCTCAGGTGGGAGAACTGAAGGATGAC	LEAFLTQKQFSHLRWEN*RM	0	43	0		0	37.7836	0		0
CTTGAGGCCTTTCTTACCCAGAAGCAGGTGGGTAAGAACAGGTGGGAGAACTGAAGGATGAC	LEAFLTQKQVGKNRWEN*RM	0	43	0		0	37.7836	0		0
CTTGAGGCCTTTCTTACCCAGAAGCAGGTAAGAAAGGTGGGAGAACTGAAGGATGACGACTT	LEAFLTQKQVRKVGELKDDD	0	43	0		0	37.7836	0		0
CTTGAGGCCTTTCTTACCCAGAAGCAGGAGAACTCAAGCAGACGACTTTGAGAAGATCAGTG	LEAFLTQKQENSSRRL*EDQ	0	43	0		0	37.7836	0		0
CTTGAGGCCTTTCTTACCCAGAAGCAGATTAAGGTGGGAGAACTGAAGGATGACGACTTTGA	LEAFLTQKQIKVGELKDDDF	0	43	0		0	37.7836	0		0
CTTGAGGCCTTTCTTACCCAGAAGCAGAGAACTGAAGGATGTGGGAGAACTGAAGGATGACG	LEAFLTQKQRTEGCGRTEG*	0	43	0		0	37.7836	0		0
CTTGAGGCCTTTCTTACCCAGAAGCAGAAGTTCTCCCAGAAGGTGGGAGAACTGAAGGATGA	LEAFLTQKQKFSQKVGELKD	0	43	0		0	37.7836	0		0
CTTGAGGCCTTTCTTACCCAGAAGCAGAAGCAGAAGCAGAAGCAGAAGCAGAAGCAGAAGGT	LEAFLTQKQKQKQKQKQKQK	0	43	0		0	37.7836	0		0
CTTGAGGCCTTTCTTACCCAGAAGCAGAACTTAAGCAGAAGCAGAACTGAAGGATGACGACT	LEAFLTQKQNLSRSRTEG*R	0	43	0		0	37.7836	0		0
CTTGAGGCCTTTCTTACCCAGAAGCAGAACTGAAGGATGTGGGAGAACTGAAGGATGACGAC	LEAFLTQKQN*RMWEN*RMT	0	43	0		0	37.7836	0		0
CTTGAGGCCTTTCTTACCCAGAAGCAGAACTGAAGGATGGAGACTTTGAGAAGATCAGTGAG	LEAFLTQKQN*RMETLRRSV	0	43	0		0	37.7836	0		0
CTTGAGGCCTTTCTTACCCAGAAGCAGAAATGTTAGGATGACATAAAATCATCCTAACAAAA	LEAFLTQKQKC*DDIKSS*Q	0	43	0		0	37.7836	0		0
CTTGAGGCCTTTCTTACCCAGAAAGGTGGGTAAGAACTGAAGGATGACGACTTTGAGAAGAT	LEAFLTQKGG*ELKDDDFEK	0	43	0		0	37.7836	0		0
CTTGAGGCCTTTCTTAAAGAACTGAAGGATGACGACTTTGAGAAGATCAGTGAGAGATCGGA	LEAFLKELKDDDFEKISERS	0	43	0		0	37.7836	0		0
CTTGAGGCCTTTCTCAAGGCCTCAAGAACTGAAGGATGACGACTTTGAGAAGATCAGTGAGA	LEAFLKASRTEG*RL*EDQ*	0	43	0		0	37.7836	0		0
CTTGAGGCCTTTCAAGGTGGGAGAACTGAAGGATGACGACTTTGAGAAGATCAGTGAGAGAT	LEAFQGGRTEG*RL*EDQ*E	0	43	0		0	37.7836	0		0
CTTGAGAAGAACGACTTTGAGAAGATCAGTGAGAGATCGGAAGAGCACACGTCTGAACTCCA	LEKNDFEKISERSEEHTSEL	0	43	0		0	37.7836	0		0
CTTGAGGCCTTTCTTACCCAGAAGCAGAAGGTGGGAGAACTGAAGGATGACCACTTTGAGAA	LEAFLTQKQKVGELKDDHFE	21	42	235		7.58252	36.9049	85.1634		0.205461
CTTGAGGCCTTTCTTACCCAGAAGCAGAAGGTGGGAGAACTGAAGGATGACGACTTTCAGAA	LEAFLTQKQKVGELKDDDFQ	10	42	200		3.61073	36.9049	72.4795		0.0978386
CTTGAGGCCTTTCTTACCCAGAAGGTGGGAGAGCTGAAGGATGACGACTTTGAGAAGATCAG	LEAFLTQKVGELKDDDFEKI	159	42	0		57.4105	36.9049	0		1.55563
CTTGAGGCCTTTCTTACCCAGAAGCAGGTGGGAGAACAGAAGGATGACGACTTTGAGAAGAT	LEAFLTQKQVGEQKDDDFEK	112	42	0		40.4401	36.9049	0		1.09579
CTTGAGGCCTTTCTTACCCAGAAGGTGGGAGAACTGAAGGATGACGACTTTGAGAAGATTAG	LEAFLTQKVGELKDDDFEKI	80	42	0		28.8858	36.9049	0		0.782709
CTTGAGGCCTTTCCGACTTTGAGAAGATCAGTGAGAGATCGGAAGAGCACACGTCTGAACTC	LEAFPTLRRSVRDRKSTRLN	17	42	0		6.13823	36.9049	0		0.166326
CTTGTGGCCTTTCTTACCCAGAAGCAGAACTGAAGGATGACGACTTTGAGAAGATCAGTGAG	LVAFLTQKQN*RMTTLRRSV	16	42	0		5.77716	36.9049	0		0.156542
CTTGAGGCCTTTCTTACCCAGAGGGAGAACTGAAGGATGACGACTTTGAGAAGATCAGTGAG	LEAFLTQREN*RMTTLRRSV	12	42	0		4.33287	36.9049	0		0.117406
CTTGAGGCCTTTCTTACCCAGAAGCAGACGACTGAAGGATGACGACTTTGAGAAGATCAGTG	LEAFLTQKQTTEG*RL*EDQ	9	42	0		3.24965	36.9049	0		0.0880548
CTTGAGGCCTTTCTTAACCAGAAGCAGAACTGAAGGATGACGACTTTGAGAAGATCAGTGAG	LEAFLNQKQN*RMTTLRRSV	4	42	0		1.44429	36.9049	0		0.0391355
CTTGAGGCCTTTGACGACTTTGAGAAGATCAGTGAGAGATCGGAAGAGCACACGTCTGAACT	LEAFDDFEKISERSEEHTSE	0	42	0		0	36.9049	0		0
CTTGAGGCCTTTCTTACCCAGAAGCTTCTTTGAGAAGCTTAGATGACGACTAAGCATAGATG	LEAFLTQKLL*EA*MTTKHR	0	42	0		0	36.9049	0		0
CTTGAGGCCTTTCTTACCCAGAAGCAGTGGGAGAACTGCATCCTTCAGTGGGAGAACTGAAG	LEAFLTQKQWENCILQWEN*	0	42	0		0	36.9049	0		0
CTTGAGGCCTTTCTTACCCAGAAGCAGGGTAAGAACTGAAGGATGACGACTTTGAGAAGATC	LEAFLTQKQGKN*RMTTLRR	0	42	0		0	36.9049	0		0
CTTGAGGCCTTTCTTACCCAGAAGCAGATTTTGACGACTTTGAGAAGATCAGTGAGAGATCG	LEAFLTQKQILTTLRRSVRD	0	42	0		0	36.9049	0		0
CTTGAGGCCTTTCTTACCCAGAAGCAGAGCAGTGGGAGAACTGAAGGATGACGACTTTGAGA	LEAFLTQKQSSGRTEG*RL*	0	42	0		0	36.9049	0		0
CTTGAGGCCTTTCTTACCCAGAAGCAGAGAACTCCCAGGTGGGAGAACTGAAGGATGACGAC	LEAFLTQKQRTPRWEN*RMT	0	42	0		0	36.9049	0		0
CTTGAGGCCGTTCTTACCCAGAAGCAGAAGGTGGGAGAACTGAAGGATGACGACTTTGAGAA	LEAVLTQKQKVGELKDDDFE	16	41	307		5.77716	36.0262	111.256		0.16036
CTTGAGGCCTTGGTGGGAGAACTGAAGGATGACGACTTTGAGAAGATCAGTGAGAGATCGGA	LEALVGELKDDDFEKISERS	656	41	0		236.864	36.0262	0		6.57476
CTTGAGGCCTTTCTTACCCAGAAGGTGGGAGAACTGGAGGATGACGACTTTGAGAAGATCAG	LEAFLTQKVGELEDDDFEKI	165	41	0		59.577	36.0262	0		1.65371
CTTGAGGCCTTTCTTACCCAGAAGCAGAGAGGGAGAACTGAAGGATGACGACTTTGAGAAGA	LEAFLTQKQRGRTEG*RL*E	116	41	0		41.8844	36.0262	0		1.16261
CTTGAGGCCTTTCTTACCCAGAAGCAGAACTGAAGGATGCTAACCTAGAACTGTGGGAGAAC	LEAFLTQKQN*RMLT*NCGR	88	41	0		31.7744	36.0262	0		0.88198
CTTGAGGCCTTTCTTACCCAGAAGCAGAGAGGAGGGAGAACTGAAGGATGACGACTTTGAGA	LEAFLTQKQRGGRTEG*RL*	32	41	0		11.5543	36.0262	0		0.32072
CTTGAGGCCTTTCTTACCCAGAAGCAGAGAACTGAACTGAAGGATGACGACTTTGAGAAGAT	LEAFLTQKQRTELKDDDFEK	18	41	0		6.49931	36.0262	0		0.180405
CTTGAGGCCTTTCTTACCCAGAAGGATGACGACTTTGAGAAGATCAGTGAGAGATCGGAAAG	LEAFLTQKDDDFEKISERSE	13	41	0		4.69394	36.0262	0		0.130292
CTTGAGGCCTTTCTTACCCAGAAGGTGGGTAAGAACTGAAGGATGGGAGAACTGAAGGATGA	LEAFLTQKVGKN*RMGELKD	6	41	0		2.16644	36.0262	0		0.060135
CTTGAGGCGAACTGAAGGATGACGACTTTGAGAAGATCAGTGAGAGATCGGAAGAGCACACG	LEAN*RMTTLRRSVRDRKST	1	41	0		0.361073	36.0262	0		0.0100225
CTTGCAGGAAGTATCTCCAGGCAGAGTGAGAGGAGCTATTAAGTCAACAGTCAAAAGGTGAA	LAGSISRQSERSY*VNSQKV	0	41	0		0	36.0262	0		0
CTTGAGGGTGGAGAACTGAAGGATGACGACTTTGAGAAGATCAGTGAGAGATCGGAAGAGCA	LEGGELKDDDFEKISERSEE	0	41	0		0	36.0262	0		0
CTTGAGGCCTTTCTTACCCAGACTTTGAAAAGACGACTTTGAGAAGATCAGTGAGAGATCGG	LEAFLTQTLKRRL*EDQ*EI	0	41	0		0	36.0262	0		0
CTTGAGGCCTTTCTTACCCAGAAGTAAGAACTGAAGGATGACGACTTTGAGAAGATCAGTGA	LEAFLTQK*ELKDDDFEKIS	0	41	0		0	36.0262	0		0
CTTGAGGCCTTTCTTACCCAGAAGGGTAAGAGAACTGAAGGATGACGACTTTGAGAAGATCA	LEAFLTQKGKRTEG*RL*ED	0	41	0		0	36.0262	0		0
CTTGAGGCCTTTCTTACCCAGAAGCTTCTGGGTAACTGAAGGATGACGACTTTGAGAAGATC	LEAFLTQKLLGN*RMTTLRR	0	41	0		0	36.0262	0		0
CTTGAGGCCTTTCTTACCCAGAAGCTGAAGGATGAACTGAAGGATGACGACTTTGAGAAGAT	LEAFLTQKLKDELKDDDFEK	0	41	0		0	36.0262	0		0
CTTGAGGCCTTTCTTACCCAGAAGCATCTTCAGGTGGGAGAACTGAAGGATGACGACTTTGA	LEAFLTQKHLQVGELKDDDF	0	41	0		0	36.0262	0		0
CTTGAGGCCTTTCTTACCCAGAAGCAGAACTTCTTACCCAGAGGTGGGAGAACTGAAGGATG	LEAFLTQKQNFLPRGGRTEG	0	41	0		0	36.0262	0		0
CTTGAGGCCTTTCTTACCCAGAAGCAGAACTTCAGGTTCTGCTTCAGGTTCCCACTTCAGGT	LEAFLTQKQNFRFCFRFPLQ	0	41	0		0	36.0262	0		0
CTTGAGGCCTTTCTTACCCAGAAGCAGAACTGAAGGTGGAGAGAAGGTGGGAGAACTGAAGG	LEAFLTQKQN*RWREGGRTE	0	41	0		0	36.0262	0		0
CTTGAGGCCTTTCTTACCCAGAAGCAGAACTGAAGATGACGAGAGAACTGAAGGATGACGAC	LEAFLTQKQN*R*REN*RMT	0	41	0		0	36.0262	0		0
CTTGAGGCCTTTCTTACCCAGAAGCAGAAAAAAAACCCAGGTGGGAGAACTGAAGGATGACG	LEAFLTQKQKKNPGGRTEG*	0	41	0		0	36.0262	0		0
CTTGAGGCCTTTCTGGGTAAGGTGGGAGAACTGAAGGATGACGACTTTGAGAAGATCAGTGA	LEAFLGKVGELKDDDFEKIS	0	41	0		0	36.0262	0		0
AGTGGGAGAACTGAAGGATGACGACTTTGAGAAGATCAGTGAGAGATCGGAAGAGCACACGT	SGRTEG*RL*EDQ*EIGRAH	0	41	0		0	36.0262	0		0
CTTGAGGCCTTGCTTACCCAGAAGCAGAAGGTGGGAGAACTGAAGGATGACGACTTTGAGAA	LEALLTQKQKVGELKDDDFE	9	40	143		3.24965	35.1475	51.8228		0.0924575
CTTGAGGCCTTTCTTACCCAGAAGCAGAAGGTGGGAGAACTGAAGGATGACGACCTTTGAGA	LEAFLTQKQKVGELKDDDL*	7	40	109		2.52751	35.1475	39.5013		0.0719114
CTTGCGGCCTTTCTTACCCAGAAGCAGAAAGGTGGGAGAACTGAAGGATGACGACTTTGAGA	LAAFLTQKQKGGRTEG*RL*	1496	40	0		540.165	35.1475	0		15.3685
CTTGAGGCCTTTCTTACCCAGAAGCAGAAAGGTGGGAGAACTGTAGGATGACGACTTTGAGA	LEAFLTQKQKGGRTVG*RL*	209	40	0		75.4642	35.1475	0		2.14707
CTTGAGGCCTTTCTTACCCAGAAGCAGAGAACTGAAGGATGACGAATTTGAGAAGATCAGTG	LEAFLTQKQRTEG*RI*EDQ	175	40	0		63.1877	35.1475	0		1.79779
CTTGAGGCCTTTCTTACCCAGGTGGGAGAACTGAAGGATGGCGACTTTGAGAAGATCAGTGA	LEAFLTQVGELKDGDFEKIS	166	40	0		59.9381	35.1475	0		1.70533
CTTGAGGCCTTTCTTGCCCAGAAGCAGAGGTGGGAGAACTGAAGGATGACGACTTTGAGAAG	LEAFLAQKQRWEN*RMTTLR	149	40	0		53.7998	35.1475	0		1.53069
CTTGAGGCCTTTCTTACCCAGTAGCAGGTGGGAGAACTGAAGGATGACGACTTTGAGAAGAT	LEAFLTQ*QVGELKDDDFEK	130	40	0		46.9394	35.1475	0		1.3355
CTTGAGGCCTTTCTTACCCAGGAGGTGGGAGAACTGAAGGATGACGACTTTGAGAAGATCAG	LEAFLTQEVGELKDDDFEKI	126	40	0		45.4951	35.1475	0		1.29441
CTTGAGGCCTTTCTTACCCAGAAGCAGGTGGGAGAACTGAAGGATGACGACTTTGAGAAGGT	LEAFLTQKQVGELKDDDFEK	122	40	0		44.0509	35.1475	0		1.25331
CTTGAGGCCTTTCTCACCCAGAAGGTGGGAGAACTGAAGGATGACGACTTTGAGAAGATCAG	LEAFLTQKVGELKDDDFEKI	118	40	0		42.6066	35.1475	0		1.21222
CTTGAGGCCTTTCTTACCCAGAAGCAGAGGTGGGAGAACTGAAGGATGACGACTTTGAGCAG	LEAFLTQKQRWEN*RMTTLS	79	40	0		28.5247	35.1475	0		0.811572
CTTGAGGCCTTTCTTACCCAGAAGCAGAACTGAAGGATGACGACTTTGAGAAGCTCAGTGAG	LEAFLTQKQN*RMTTLRSSV	58	40	0		20.9422	35.1475	0		0.595837
CTTGAGGCCTTTCTTACCCAGAAGCAGAAAGGAGGGAGAACTGAAGGATGACGACATTGAGA	LEAFLTQKQKGGRTEG*RH*	31	40	0		11.1933	35.1475	0		0.318465
CTTGAGGCCTTTCTTCCCCAGGTGGGAGAACTGAAGGATGACGACTTTGAGAAGATCAGTGA	LEAFLPQVGELKDDDFEKIS	21	40	0		7.58252	35.1475	0		0.215734
CTTGAGGCCTTTCTTACCCAGAAGGATGACGACTTTGAAAGATCAGTGAGAGATCGGAAGAG	LEAFLTQKDDDFERSVRDRK	14	40	0		5.05502	35.1475	0		0.143823
CTTGAGGCCTTTCTTACCCAGAAACAGAACCCCACGCGCCCCCCAAAATTGATCGGAGAAAT	LEAFLTQKQNPTRPPKLIGE	1	40	0		0.361073	35.1475	0		0.0102731
CTTGAGGCCTTTCTTACCCAGAAGCAGAACTGAAGGATGGGAGGCCTTCAGTGGGAGAACTG	LEAFLTQKQN*RMGGLQWEN	0	40	0		0	35.1475	0		0
CTTGAGGCCTTCTTACCAGTTCTCCAGGTGGGAGAACTGAAGGATGACGACTTTGAGAAGAT	LEAFLPVLQVGELKDDDFEK	0	40	0		0	35.1475	0		0
CTTGAGGCCTTCTGGGTAAGAAAGGTGGGAGAACTGAAGGATGACGACTTTGAGAAGATCAG	LEAFWVRKVGELKDDDFEKI	0	40	0		0	35.1475	0		0
CTTGAGGCCTTTCTTACCCAGAAGCAGAGGTGGGAGAAATGAAGGATGACGACTTTGAGAAG	LEAFLTQKQRWEK*RMTTLR	146	39	0		52.7166	34.2688	0		1.53832
CTTGAGGCCTTTCTTACCCAGAAGCAGAGAACTGAAGGATGACGACTTTGAGAAGACAGTGA	LEAFLTQKQRTEG*RL*EDS	91	39	0		32.8576	34.2688	0		0.958819
CTTGTGGCCTTTCTTACCCAGAAGCAGAGGTGGGAGAACTGAAGGATGACGACTTTGAGAAG	LVAFLTQKQRWEN*RMTTLR	78	39	0		28.1637	34.2688	0		0.821845
CTTGAGGCCTTTCTTACCCAGAAGCAGCTGGGAGAACTGAAGGATGACGACTTTGAGAAGAT	LEAFLTQKQLGELKDDDFEK	57	39	0		20.5811	34.2688	0		0.600579
CTTGAGGCCTTTCTTACCCAGAAGCAGGTGGGAGAACGGAAGGATGACGACTTTGAGAAGAT	LEAFLTQKQVGERKDDDFEK	38	39	0		13.7208	34.2688	0		0.400386
CTAAGGATGACGACTTTGAGAAGATCAGTGAGAGATCGGAAGAGCACACGTCTGAACTCCAG	LRMTTLRRSVRDRKSTRLNS	36	39	0		12.9986	34.2688	0		0.379313
CTTGAGGCCTTTCTTACCCAGGGTGGGAGAACTGAAGGATGACGACTTTGAGAAGATCAGTG	LEAFLTQGGRTEG*RL*EDQ	34	39	0		12.2765	34.2688	0		0.35824
CTTGAGGCCTTTCTTACCCAGAAGCAGAAGAAGAAGAAGGTGGGAGAACTGAAGGATGACGA	LEAFLTQKQKKKKVGELKDD	16	39	0		5.77716	34.2688	0		0.168584
CTTGAGGCCTTTCTTACCCAGAGCAGAAAGGTGGGAGAACTGAAGGATGACGACTTTGAGAA	LEAFLTQSRKVGELKDDDFE	15	39	0		5.41609	34.2688	0		0.158047
CTTGAGGCCTTTCTTACCCAGAAGGATGACGACTTTGAGAGATCAGTGAGAGATCGGAAGAG	LEAFLTQKDDDFERSVRDRK	9	39	0		3.24965	34.2688	0		0.0948282
CTTGAGGCCTTTCTTACCCAGAAGGATGACGACTTTGAGAAGATCAGTGCGAGATCGGAAGA	LEAFLTQKDDDFEKISARSE	1	39	0		0.361073	34.2688	0		0.0105365
CTTGAGGCCTTTCTTACCCAGAAGGTAAGAAAGGTAAGAAAGAAGGTGGGAGAACTGAAGGA	LEAFLTQKVRKVRKKVGELK	0	39	0		0	34.2688	0		0
CTTGAGGCCTTTCTTACCCAGAAGCCCTGAGAGGTAAAGCATGTTGGTGATAGTCATCCCGG	LEAFLTQKP*EVKHVGDSHP	0	39	0		0	34.2688	0		0
CTTGAGGCCTTTCTTACCCAGAAGCAGTGGGTAAGAAAGGTGGGAGAACTGAAGGATGACGA	LEAFLTQKQWVRKVGELKDD	0	39	0		0	34.2688	0		0
CTTGAGGCCTTTCTTACCCAGAAGCAGGCCTTTCTTACCCAGAAGCAGTGGGAGAACTGAAG	LEAFLTQKQAFLTQKQWEN*	0	39	0		0	34.2688	0		0
CTTGAGGCCTTTCTTACCCAGAAGCAGATGAAAGTGGGAGAACTGAAGGATGACGACTTTGA	LEAFLTQKQMKVGELKDDDF	0	39	0		0	34.2688	0		0
CTTGAGGCCTTTCTTACCCAGAAGCAGAGACGACTTTGAGAAGATCAGTGAGAGATCGGAAG	LEAFLTQKQRRL*EDQ*EIG	0	39	0		0	34.2688	0		0
CTTGAGGCCTTTCTTACCCAGAAGCAGAAGAAAGGTGGGAGAGGCCTTTCTTACCCAGAAGG	LEAFLTQKQKKGGRGLSYPE	0	39	0		0	34.2688	0		0
CTTGAGGCCTTTCTTACCCAGAAGCAGAACTGGTAAGAGAACTGAAGGATGACGACTTTGAG	LEAFLTQKQNW*EN*RMTTL	0	39	0		0	34.2688	0		0
CTTGAGGCCTTTCTTACCCAGAAGCAGAACTGGAACTGAAGGATGACGACTTTGAGAAGATC	LEAFLTQKQNWN*RMTTLRR	0	39	0		0	34.2688	0		0
CTTGAGGCCTTTCTTACCCAGAAGCAGAAACTTCTTCTGCAGGTGGGAGAACTGAAGGATGA	LEAFLTQKQKLLLQVGELKD	0	39	0		0	34.2688	0		0
CTTGAGGCCTTTCTTACCCAGAAGCAAGAACTTTGGGTAAGAACAGTGGGAGAACTGAAGGA	LEAFLTQKQELWVRTVGELK	0	39	0		0	34.2688	0		0
CTTGAGGCCTTTCTTACCCAGAAGAAAGGTTGGGAGAACTGAAGGATGACGACTTTGAGAAG	LEAFLTQKKGWEN*RMTTLR	0	39	0		0	34.2688	0		0
CTTGAGGCCTTTCTTACCCAGAAACAGCTCCCTGAGGTGGGAGAACTGAAGGATGACGACTT	LEAFLTQKQLPEVGELKDDD	0	39	0		0	34.2688	0		0
CTTGAGGCCTTTCTTACCCAGAAGCAGAAGGTGGGATAACTGAAGGATGACGACTTTGAGAA	LEAFLTQKQKVG*LKDDDFE	55	38	551		19.859	33.3902	199.681		0.594756
CTTGAGGCCTTTCTTACACAGAAGCAGAAGGAGGGAGAACTGAAGGATGACGACTTTGAGAA	LEAFLTQKQKEGELKDDDFE	0	38	107		0	33.3902	38.7765		0
CTTGAGGCCTTTCTTACCCAGAAGCAGAGGTGGGAGAACTGGAGGATGACGACTTTGAGAAG	LEAFLTQKQRWENWRMTTLR	167	38	2		60.2991	33.3902	0.724795		1.8059
CTTGAGGCCTTTCTTACCCAGAAGCAGGGGAGAACTGAAGGATGACGACTTTGAGAAGATCA	LEAFLTQKQGRTEG*RL*ED	6636	38	0		2396.08	33.3902	0		71.76
CTTGAGGCCTTTCTTACCCAGAAGTGGAGAACTGAAGGATGACGACTTTGAGAAGATCAGTG	LEAFLTQKWRTEG*RL*EDQ	286	38	0		103.267	33.3902	0		3.09273
CTTGAGGCCTTTCTTACCCAGAAGCAGGTGGGAGAACTGTAGGATGACGACTTTGAGAAGAT	LEAFLTQKQVGEL*DDDFEK	225	38	0		81.2413	33.3902	0		2.43309
CTTGAGGCCTTTCTTACCCAGAAGCAGAGGTGGGAGAACTGAAAGATGACGACTTTGAGAAG	LEAFLTQKQRWEN*KMTTLR	163	38	0		58.8548	33.3902	0		1.76264
CTTGAGGCCTTTCTTACCCAGAAGCAGGTGGGAGAACTGAAGGATGACGACTTTGAGACGAT	LEAFLTQKQVGELKDDDFET	147	38	0		53.0777	33.3902	0		1.58962
CTTGAGGCCTTTCTTACCCAGAAGATGGGAGAACTGAAGGATGACGACTTTGAGAAGATCAG	LEAFLTQKMGELKDDDFEKI	147	38	0		53.0777	33.3902	0		1.58962
CTTGAGGCCTTTCTTACCCAGAAGCAGAACTGAAGGATGACGACTTTGAGCAGATCAGTGAG	LEAFLTQKQN*RMTTLSRSV	88	38	0		31.7744	33.3902	0		0.95161
CTTGAGGCCTTTCTTACCCAGAAGCAGGGAACTGAAGGATGACGACTTTGAGAAGATCAGTG	LEAFLTQKQGTEG*RL*EDQ	78	38	0		28.1637	33.3902	0		0.843472
CTTGAGGCCTTTCTTACCCAGAAGGTGGGCGAACTGAAGGATGACGACTTTGAGAAGATCAG	LEAFLTQKVGELKDDDFEKI	69	38	0		24.914	33.3902	0		0.746148
CTTGAGGCCTTTCTTACCCAGAAGGTAAGAGAACTGAAGGATGACGACTTTGAGAAGATCAG	LEAFLTQKVRELKDDDFEKI	63	38	0		22.7476	33.3902	0		0.681266
CTTGAGGCCTTTCTTACCCAGAAGCAGAACTGGGTAGAACTGAAGGATGACGACTTTGAGAA	LEAFLTQKQNWVELKDDDFE	27	38	0		9.74896	33.3902	0		0.291971
CTTGAGGCCTTTCTTACCCAGAAGCAGAACTGAAGGATGACGACTTTGAGAAGTCAGTGAGA	LEAFLTQKQN*RMTTLRSQ*	25	38	0		9.02682	33.3902	0		0.270344
CTTGAGGCCTTTCTTCTGGGTAAGAACTGAAGGATGACGACTTTGAGAAGATCAGTGAGAGA	LEAFLLGKN*RMTTLRRSVR	18	38	0		6.49931	33.3902	0		0.194647
CTTGAGGCCTTTCTTACCCAGAAGCAGATTGGGAGAACTGAAGGATGACGACTTTGAGAAGA	LEAFLTQKQIGRTEG*RL*E	12	38	0		4.33287	33.3902	0		0.129765
CTTGAGAACTGACGGATGACGACTTTGAGAAGATCAGTGAGAGATCGGAAGAGCACACGTCT	LEN*RMTTLRRSVRDRKSTR	8	38	0		2.88858	33.3902	0		0.08651
CTTGAGGCCTTTCTTACCCAGAAGCAGAGAACTGCTTCTGGTGGGAGAACTGAAGGATGACG	LEAFLTQKQRTASGGRTEG*	1	38	0		0.361073	33.3902	0		0.0108137
CTTGAGGCTTTCAGTTCAGGGAGAACTGAAGGATGACGACTTTGAGAAGATCAGTGAGAGAT	LEAFSSGRTEG*RL*EDQ*E	0	38	0		0	33.3902	0		0
CTTGAGGCCTTTCTTCCCAGGTGGGAGAACTGAAGGATGACGACTTTGAGAAGATCAGTGAG	LEAFLPRWEN*RMTTLRRSV	0	38	0		0	33.3902	0		0
CTTGAGGCCTTTCTTACCCAGAGAAAGGAGAACTGAAGGATGACGACTTTGAGAAGATCAGT	LEAFLTQRKEN*RMTTLRRS	0	38	0		0	33.3902	0		0
CTTGAGGCCTTTCTTACCCAGAAGCTTGTGGAAGAACTGAAGGATGACGACTTTGAGAAGAT	LEAFLTQKLVEELKDDDFEK	0	38	0		0	33.3902	0		0
CTTGAGGCCTTTCTTACCCAGAAGCTTACCTGAAGGTGGGAGAACTGAAGGATGACGACTTT	LEAFLTQKLT*RWEN*RMTT	0	38	0		0	33.3902	0		0
CTTGAGGCCTTTCTTACCCAGAAGCAGTTCTTCAGTTCTCCCACCTGGGATGACGACTTTGA	LEAFLTQKQFFSSPTWDDDF	0	38	0		0	33.3902	0		0
CTTGAGGCCTTTCTTACCCAGAAGCAGTTCAGGAGAACTGAAGGATGACGACTTTGAGAAGA	LEAFLTQKQFRRTEG*RL*E	0	38	0		0	33.3902	0		0
CTTGAGGCCTTTCTTACCCAGAAGCAGTGGGATAACTGAAGGATGACGACTTTGAGAAGATC	LEAFLTQKQWDN*RMTTLRR	0	38	0		0	33.3902	0		0
CTTGAGGCCTTTCTTACCCAGAAGCAGGTGGGAAGAAGGTGGGAGAACTGAAGGATGACGAC	LEAFLTQKQVGRRWEN*RMT	0	38	0		0	33.3902	0		0
CTTGAGGCCTTTCTTACCCAGAAGCAGCTGAAGAACTGAAGGATGACGACTTTGAGAAGATC	LEAFLTQKQLKN*RMTTLRR	0	38	0		0	33.3902	0		0
CTTGAGGCCTTTCTTACCCAGAAGCAGAAGAAAGAAAAGAAGCAGAAGAAAGAAAGCAGTGG	LEAFLTQKQKKEKKQKKESS	0	38	0		0	33.3902	0		0
CTTGAGGCCTTTCTTACCCAGAAGCAGAACTGATGACGACTTTGAGAAGATCAGTGAGAGAT	LEAFLTQKQN**RL*EDQ*E	0	38	0		0	33.3902	0		0
CTTGAGGCCTTTCTTACCCAGAAGAAATGACGACTTTGAGAAGATCAGTGAGAGATCGGAAG	LEAFLTQKK*RL*EDQ*EIG	0	38	0		0	33.3902	0		0
CTTGAGGCCTTTCTTACCCAGAAGAAAGAAAGAAGGTGGGAGAACTGAAGGATGACGACTTT	LEAFLTQKKERRWEN*RMTT	0	38	0		0	33.3902	0		0
CTTGAGGCCTTTCTTACCCAGAAGAAAACTGTGGGAGAACTGAAGGATGACGACTTTGAGAA	LEAFLTQKKTVGELKDDDFE	0	38	0		0	33.3902	0		0
CTTGAGGCCTTTCTTACCCAGAACTTTGAGAAGATCAGTGAGAGATCGGAAGAGCACACGTC	LEAFLTQNFEKISERSEEHT	0	38	0		0	33.3902	0		0
CTTGAGGCCTTTCTTACCCACCTGCTTCTGGGTGGGAGAACTGAAGGATGACGACTTTGAGA	LEAFLTHLLLGGRTEG*RL*	0	38	0		0	33.3902	0		0
CTTGAGGCCAAGAAGAAGGTGGGAGAACTGAAGGATGACGACTTTGAGAAGATCAGTGAGAG	LEAKKKVGELKDDDFEKISE	0	38	0		0	33.3902	0		0
CTTAACTGAAGGATGACGACTTTGAGAAGATCAGTGAGAGATCGGAAGAGCACACGTCTGAA	LN*RMTTLRRSVRDRKSTRL	0	38	0		0	33.3902	0		0
CTTGAGGCCTTTCTTACCCAGAAGCAGAAGGTGGGAGATCTGAAGGATGACGACTTTGAGAA	LEAFLTQKQKVGDLKDDDFE	7	37	235		2.52751	32.5115	85.1634		0.0777421
CTTGAGGCCTTTCTTACCCAGAACTGAAGGATGACGACTTTGAGAAGATCAGAGAGAGATCG	LEAFLTQN*RMTTLRRSERD	518	37	0		187.036	32.5115	0		5.75291
CTTGAGGCCTTTCTTACCCAGAAGCAGACGGGAGAACTGAAGCAGGTGGGAGAACAGAAGCA	LEAFLTQKQTGELKQVGEQK	400	37	0		144.429	32.5115	0		4.4424
CTTGAGGCCTTTCTTACCCAGAAGCGGAAGGATGACGACTTTGAGAAGATCAGTGAGAGATC	LEAFLTQKRKDDDFEKISER	158	37	0		57.0495	32.5115	0		1.75475
CTTGAGGCCTTTCTTACCCAGGTGGGAGAACTGAAGGATGACGACTTTGAGAAGATCAGAGA	LEAFLTQVGELKDDDFEKIR	145	37	0		52.3555	32.5115	0		1.61037
CTTGAGGCCTTTCTTACCCGGAAGGTGGGAGAACTGAAGGATGACGACTTTGAGAAGATCAG	LEAFLTRKVGELKDDDFEKI	131	37	0		47.3005	32.5115	0		1.45489
CTTGAGGCCCTTCTTACCCAGAAGCAGAGAACTGAAGGATGACGACTTTGAGAAGATCAGTG	LEALLTQKQRTEG*RL*EDQ	102	37	0		36.8294	32.5115	0		1.13281
CTTGAGGTCTTTCTTACCCAGAAGGTGGGAGAACTGAAGGATGACGACTTTGAGAAGATCAG	LEVFLTQKVGELKDDDFEKI	99	37	0		35.7462	32.5115	0		1.09949
CTTGAGGCCTTACTTACCCAGAAGCAGAAAGGTGGGAGAACTGAAGGATGACGACTTTGAGA	LEALLTQKQKGGRTEG*RL*	99	37	0		35.7462	32.5115	0		1.09949
CTTGAGGCCTTTCTTACCCAGAAGCAGACCTGAAGGATGACGACTTTGAGAAGATCAGTGAG	LEAFLTQKQT*RMTTLRRSV	70	37	0		25.2751	32.5115	0		0.777421
CTTGAGGCCTTTCTTACCCAGAAGCATGAACTGAAGGATGACGACTTTGAGAAGATCAGTGA	LEAFLTQKHELKDDDFEKIS	40	37	0		14.4429	32.5115	0		0.44424
CTTGAGGCCTTTCTTACCCAGAAGCAGACTAAGAGACTGAAGGATGACGACTTTGAGAAGAT	LEAFLTQKQTKRLKDDDFEK	10	37	0		3.61073	32.5115	0		0.11106
CTTGAGGCCTTTCTTACCCAGAAGGATGACGACTTTGAGAAATCAGTGAGAGATCGGAAGAG	LEAFLTQKDDDFEKSVRDRK	9	37	0		3.24965	32.5115	0		0.0999541
CTTGAGGCCTTTCTTACCCAGAAGCAGAGAGGATGACGACTTTGAGAAGATCAGTGAGAGAT	LEAFLTQKQRG*RL*EDQ*E	8	37	0		2.88858	32.5115	0		0.0888481
CTTGAGGCCTTTCTTACCCAGAAGCGACTTTGAGAAGATCAGTGAGAGATCGGAAGAGCACA	LEAFLTQKRL*EDQ*EIGRA	5	37	0		1.80536	32.5115	0		0.05553
CTTGAGGCCTTTCTTACCCATCCTTCAGGTGGGAGAACTGAAGGATGACGACTTTGAGAAGA	LEAFLTHPSGGRTEG*RL*E	2	37	0		0.722145	32.5115	0		0.022212
CTTGAGGCCTTTTTTACCCAGAAGTTTTTTTTAGAAGTTCAACCTTACTACGTAACTATTTA	LEAFFTQKFFLEVQPYYVTI	0	37	0		0	32.5115	0		0
CTTGAGGCCTTTCTTCCCAAGGATGACGACTTTGAGAAGATCAGTGAGAGATCGGAAGAGCA	LEAFLPKDDDFEKISERSEE	0	37	0		0	32.5115	0		0
CTTGAGGCCTTTCTTACTTGAGGCCTTTCTTTCTTCTGTGTGTGGACTTCCCTTTCCTATCT	LEAFLT*GLSFFCVWTSLSY	0	37	0		0	32.5115	0		0
CTTGAGGCCTTTCTTACGTGGGAGAACTGAAGGATGACGACTTTGAGAAGATCAGTGAGAGA	LEAFLTWEN*RMTTLRRSVR	0	37	0		0	32.5115	0		0
CTTGAGGCCTTTCTTACCCAGAAGGATGAAGGATGACGACTTTGAGAAGATCAGTGAGAGAT	LEAFLTQKDEG*RL*EDQ*E	0	37	0		0	32.5115	0		0
CTTGAGGCCTTTCTTACCCAGAAGCTTCTGAACTGGGATGACGACTTTGAGAAGATCAGTGA	LEAFLTQKLLNWDDDFEKIS	0	37	0		0	32.5115	0		0
CTTGAGGCCTTTCTTACCCAGAAGCATGGGTGAAGGATGACGACTTTGAGAAGATCAGTGAG	LEAFLTQKHG*RMTTLRRSV	0	37	0		0	32.5115	0		0
CTTGAGGCCTTTCTTACCCAGAAGCAGTGGTAAGAGAACTGAAGGATGACGACTTTGAGAAG	LEAFLTQKQW*EN*RMTTLR	0	37	0		0	32.5115	0		0
CTTGAGGCCTTTCTTACCCAGAAGCAGAGAACTGTGGGAGAACTGAAGGATGACGACTTTGA	LEAFLTQKQRTVGELKDDDF	0	37	0		0	32.5115	0		0
CTTGAGGCCTTTCTTACCCAGAAGCAGACTGGGTATGACTGAAGGATGACGACTTTGAGAAG	LEAFLTQKQTGYD*RMTTLR	0	37	0		0	32.5115	0		0
CTTGAGGCCTTTCTTACCCAGAAGCAGACTGCTAGAGATTTTCCACACTGACTAAAAGGGTC	LEAFLTQKQTARDFPH*LKG	0	37	0		0	32.5115	0		0
CTTGAGGCCTTTCTTACCCAGAAGCAGAACTTGAAGGATGACGACTTTGAGAAGATCAGTGA	LEAFLTQKQNLKDDDFEKIS	0	37	0		0	32.5115	0		0
CTTGAGGCCTTTCTTACCCAGAAGCAGAACTTAGAACTGAAGGATGACGACTTTGAGAAGAT	LEAFLTQKQNLELKDDDFEK	0	37	0		0	32.5115	0		0
CTTGAGGCCTTTCTTACCCAGAAGCAGAACTGAGTGGGAGAACTGAAGGATGACGACTTTGA	LEAFLTQKQN*VGELKDDDF	0	37	0		0	32.5115	0		0
CTTGAGGCCTTTCTTACCCAGAAGCAGAACTGAAGTTCTGCTTCTGGGTAAGAACTGAAGGT	LEAFLTQKQN*SSASG*ELK	0	37	0		0	32.5115	0		0
CTTGAGGCCTTTCTTACCCAGAAGCAGAAAGAAAAGTGGGAGAACTGAAGGATGACGACTTT	LEAFLTQKQKEKWEN*RMTT	0	37	0		0	32.5115	0		0
CTTGAGGCCTTTCTTACCCAGAAGCACAGAAGAACTGAAGGATGACGACTTTGAGAAGATCA	LEAFLTQKHRRTEG*RL*ED	0	37	0		0	32.5115	0		0
CTTGAGGCCTTTCTTACCCAGAAGAACTGGAGAACTGAAGGATGACGACTTTGAGAAGATCA	LEAFLTQKNWRTEG*RL*ED	0	37	0		0	32.5115	0		0
CTTGAGGCCTTTCTTACCCAGAAGAAAGGCCTTGAGGCCTTTCTTACCCAGGTGGGAGAACT	LEAFLTQKKGLEAFLTQVGE	0	37	0		0	32.5115	0		0
CTTGAGGCCTTTCTTACCCAGAACTGGGTAATGTTCCTGGACCTGATTACATTGAAAATGAG	LEAFLTQNWVMFLDLITLKM	0	37	0		0	32.5115	0		0
CTTGAGGAGAACTCAAGGAGAACTGAAGGATGACGACTTTGAGAAGATCAGTGAGAGATCGG	LEENSRRTEG*RL*EDQ*EI	0	37	0		0	32.5115	0		0
CTGTGGGAGAACTGAAGGATGACGACTTTGAGAAGATCAGTGAGAGATCGGAAGAGCACACG	LWEN*RMTTLRRSVRDRKST	0	37	0		0	32.5115	0		0
CTTAGGCCTTTCTTACCCAGAAGCAGAAGGTGGGAGAACTGAAGGATGACGACTTTGAGAAG	LRPFLPRSRRWEN*RMTTLR	7	36	160		2.52751	31.6328	57.9836		0.0799016
CTTGAGGCCTTTCTTACCCAGAAGCAGAAGGTGGGAGACCTGAAGGATGACGCCTTTGAGAA	LEAFLTQKQKVGDLKDDAFE	5	36	43		1.80536	31.6328	15.5831		0.0570725
CTTGAGGCCTTTCTTACCCAGAAGAAGAAGGTGGGAGAACTGAAGGATGACGCCTTTGAGAA	LEAFLTQKKKVGELKDDAFE	0	36	22		0	31.6328	7.97274		0
CTTGAGGCCTTTCTTACCCAGAACTGAAGGATGACGACTTTGAGAAGATCAGTGAAGATCGG	LEAFLTQN*RMTTLRRSVKI	515	36	0		185.952	31.6328	0		5.87847
CTTGAGGCCTTTCTTACCCAGAACTGAAGGATGACGACTTTGAGAAGATCAGTGAGAATCGG	LEAFLTQN*RMTTLRRSVRI	381	36	0		137.569	31.6328	0		4.34893
CTTGAGGCCTTTCCTACCCAGAACTGAAGGATGACGACTTTGAGAAGATCAGTGAGAGATCG	LEAFPTQN*RMTTLRRSVRD	340	36	0		122.765	31.6328	0		3.88093
CTTGAGGCCTTTCTTACCCAGAAGCAGGTGGGAGTACTGAAGGATGACGACTTTGAGAAGAT	LEAFLTQKQVGVLKDDDFEK	169	36	0		61.0213	31.6328	0		1.92905
CTTGAGGCCTTTCTTACCCAGAAGCAGAGGTGGGAGAACTGAAGGATGACGACTTTGAAAAG	LEAFLTQKQRWEN*RMTTLK	155	36	0		55.9663	31.6328	0		1.76925
CTTGAGGCCTTTCATACCCAGAAGCAGAAAGGTGGGAGAACTGAAGGATGACGACTTTGAGA	LEAFHTQKQKGGRTEG*RL*	147	36	0		53.0777	31.6328	0		1.67793
CTTGAGGCCTTTCTTACCCAGAAGCAGAGGTGGGAGAACTGAAGGATGAAGACTTTGAGAAG	LEAFLTQKQRWEN*RMKTLR	88	36	0		31.7744	31.6328	0		1.00448
CTTGAGGCCTTTCTTACCCAGAAGCAGAAAGGTTGGAGAACTGAAGGATGACGACTTTGAGA	LEAFLTQKQKGWRTEG*RL*	58	36	0		20.9422	31.6328	0		0.662041
CTTGAGGCCTTTCTTGCCCAGAAGCAGAACTGAAGGATGACGACTTTGAGAAGATCAGTGAG	LEAFLAQKQN*RMTTLRRSV	48	36	0		17.3315	31.6328	0		0.547896
CTTGAGGCCTTTCTTACCCAGAAGCAGAACTGAAGGATGACGACTTTGAGAAGATTAGTGAG	LEAFLTQKQN*RMTTLRRLV	48	36	0		17.3315	31.6328	0		0.547896
CTTGAGGCCTTTCCAGTTCAGGGAGAACTGAAGGATGACGACTTTGAGAAGATCAGTGAGAG	LEAFPVQGELKDDDFEKISE	47	36	0		16.9704	31.6328	0		0.536482
CTTGAGGCCTTTCTTACCCAGAAGCAGAACTGAAGGATGAAGGATGACGACTTTGAGAAGAT	LEAFLTQKQN*RMKDDDFEK	42	36	0		15.165	31.6328	0		0.479409
TTTGAGGCCTTTCTTACCCAGAAGCAGAACTGAAGGATGACGACTTTGAGAAGATCAGTGAG	FEAFLTQKQN*RMTTLRRSV	30	36	0		10.8322	31.6328	0		0.342435
CTTGAGGCCTTTCTTACCCAGAAGCAGAGGGGGAGAACTGAAGGATGACGACTTTGAGAAGA	LEAFLTQKQRGRTEG*RL*E	28	36	0		10.11	31.6328	0		0.319606
CTTGAGGCCTTTCTTACCCAGAAGCAGAAGGAACTGAAGGATGACGACTTTGAGAAGATCAG	LEAFLTQKQKELKDDDFEKI	17	36	0		6.13823	31.6328	0		0.194047
CTTGAGGCCTTTCTTACCCAGAAGAAAGAGAACTGAAGGATGACGACTTTGAGAAGATCAGT	LEAFLTQKKEN*RMTTLRRS	16	36	0		5.77716	31.6328	0		0.182632
CTTGAGGCCTTTCTTACCCAGAAGCAGAACTGAAGGATGAACTGAAGGGAGAACTGAAGGAT	LEAFLTQKQN*RMN*REN*R	12	36	0		4.33287	31.6328	0		0.136974
CTTGAGGCCTTTCTTACCCAGAAGCAGAACTTTCTTACCCAGAAGGAGAACTGAAGGATGAC	LEAFLTQKQNFLTQKEN*RM	6	36	0		2.16644	31.6328	0		0.0684871
CTTGAGGCCTTTCTTCCCAAGAAGCAGAAAGGTGGGAGAACTGAAGGATGACGACTTTGAGA	LEAFLPKKQKGGRTEG*RL*	3	36	0		1.08322	31.6328	0		0.0342435
CTTGCTTTGTGGGAGAACTGAAGGATGACGACTTTGAGAAGATCAGTGAGAGATCGGAAGAG	LALWEN*RMTTLRRSVRDRK	0	36	0		0	31.6328	0		0
CTTGAGGCCTTTCTTCAAAGAACTGTGGGAGAACTGAAGGATGACGACTTTGAGAAGATCAG	LEAFLQRTVGELKDDDFEKI	0	36	0		0	31.6328	0		0
CTTGAGGCCTTTCTTACCCAGTTCTCCAACTGGGTAAGTTCTCCAACTTGGATGACGACTTT	LEAFLTQFSNWVSSPTWMTT	0	36	0		0	31.6328	0		0
CTTGAGGCCTTTCTTACCCAGAAGTTCAGTGGGAGAACTGAAGGATGACGACTTTGAGAAGA	LEAFLTQKFSGRTEG*RL*E	0	36	0		0	31.6328	0		0
CTTGAGGCCTTTCTTACCCAGAAGCAGGTGGGAGGTAAGAAGGTGGGAGAACTGAAGGATGA	LEAFLTQKQVGGKKVGELKD	0	36	0		0	31.6328	0		0
CTTGAGGCCTTTCTTACCCAGAAGCAGAATTCTTTGACGACTTTGAGAAGATCAGTGAGAGA	LEAFLTQKQNSLTTLRRSVR	0	36	0		0	31.6328	0		0
CTTGAGGCCTTTCTTACCCAGAAGCACCTTCTCAGGTGGGAGAACTGAAGGATGACGACTTT	LEAFLTQKHLLRWEN*RMTT	0	36	0		0	31.6328	0		0
CTTGAGGCCTTTCTTACCCACCTTCTGAAGGATGACGACTTTGAGAAGATCAGTGAGAGATC	LEAFLTHLLKDDDFEKISER	0	36	0		0	31.6328	0		0
CTTGAGGCCTTTCTTACCCAGAAGCAGAAGGTGGGAGAACTGAAGGATGACGACTTTGAGTA	LEAFLTQKQKVGELKDDDFE	2	35	144		0.722145	30.7541	52.1852		0.0234813
CTTGAGGCCTTTCTTACCCAGAAGCAGAAGGTGGGACAACTGAAGGATGACGACTTTGAGAA	LEAFLTQKQKVGQLKDDDFE	14	35	94		5.05502	30.7541	34.0654		0.164369
CTTGAGGCCTTTCTTACCCAGAAGCAGAGAACTTACCCAGGTGGGAGAACTGAAGGATGACG	LEAFLTQKQRTYPGGRTEG*	1247	35	0		450.258	30.7541	0		14.6406
CTTGGGGCCTTTCTTACCCAGAACTGAAGGATGACGACTTTGAGAAGATCAGTGAGAGATCG	LGAFLTQN*RMTTLRRSVRD	425	35	0		153.456	30.7541	0		4.98977
CTTGAGGCCTTTCTTACCCTGAAGCAGAAAGGTGGGAGAACTGAAGGATGACGACTTTGAGA	LEAFLTLKQKGGRTEG*RL*	199	35	0		71.8535	30.7541	0		2.33639
CTTGAGGCCTTTCTTACCCAGGTGGGAGAACTGAAGGATGACGACTTTGAGAAGATCATGAG	LEAFLTQVGELKDDDFEKIM	177	35	0		63.9099	30.7541	0		2.07809
CTTGAGGCCTTTCTTACCCAGAAGCAGAGGTGGGAGCACTGAAGGATGACGACTTTGAGAAG	LEAFLTQKQRWEH*RMTTLR	147	35	0		53.0777	30.7541	0		1.72587
CTTGAGGCCTTTCTTACCCAGAAGCAGAGAACTGAGGGATGACGACTTTGAGAAGATCAGTG	LEAFLTQKQRTEG*RL*EDQ	115	35	0		41.5234	30.7541	0		1.35017
CTTGAGGCCTTTCTTACCCAGAAGCAGGTGGGAGAACTGAAGGATGACGACTTTGAGGAGAT	LEAFLTQKQVGELKDDDFEE	102	35	0		36.8294	30.7541	0		1.19754
CTTGAGGCCTTTCTTACCCAGAAGCAGAGGTGGGAGAACTGAAGGATGATGACTTTGAGAAG	LEAFLTQKQRWEN*RMMTLR	99	35	0		35.7462	30.7541	0		1.16232
CTTGAGGCCTTTCTTACCCAGAAGCAGAATGGTGGGAGAACTGAAGGATGACGACTTTGAGA	LEAFLTQKQNGGRTEG*RL*	92	35	0		33.2187	30.7541	0		1.08014
CTTGAGGCCTTTCTTACCCAGAAGCAGAAAGGTGGGAGAACTGAAGGATGACGACTATGAGA	LEAFLTQKQKGGRTEG*RL*	92	35	0		33.2187	30.7541	0		1.08014
CTTGAGGCCTTTCTTACCCAGAAGCAGAGGACTGAAGGATGACGACTTTGAGAAGATCAGTG	LEAFLTQKQRTEG*RL*EDQ	89	35	0		32.1355	30.7541	0		1.04492
CTCGAGGCCTTTCTTACCCAGAAGCAGAGAACTGAAGGATGACGACTTTGAGAAGATCAGTG	LEAFLTQKQRTEG*RL*EDQ	78	35	0		28.1637	30.7541	0		0.91577
CTTGAGGCCTTTCTTACCCAGAAGCAGTTGGGAGAACTGAAGGATGACGACTTTGAGAAGAT	LEAFLTQKQLGELKDDDFEK	53	35	0		19.1368	30.7541	0		0.622254
CTTGAGGCCTTTCTTACCCAGAAGCAGAACTGAAGAATGACGACTTTGAGAAGATCAGTGAG	LEAFLTQKQN*RMTTLRRSV	40	35	0		14.4429	30.7541	0		0.469625
CTTGAGGCCTTTCTTACCCAGAAGAAACTTGAGGTGGGAGAACTGAAGGATGACGACTTTGA	LEAFLTQKKLEVGELKDDDF	37	35	0		13.3597	30.7541	0		0.434404
CTTGAGGCCTTTCTTACCCAGAAGCAGAATAGGTGGGAGAACTGAAGGATGACGACTTTGAG	LEAFLTQKQNRWEN*RMTTL	19	35	0		6.86038	30.7541	0		0.223072
CTTGAGGCCTTTCTTACGAAGGTGGGAGAACTGAAGGATGACGACTTTGAGAAGATCAGTGA	LEAFLTKVGELKDDDFEKIS	9	35	0		3.24965	30.7541	0		0.105666
CTTGAGGCCTTTCTTACCCAGAAGCAGAGAACTTACCCAGAAGGTGGGAGAACTGAAGGATG	LEAFLTQKQRTYPEGGRTEG	2	35	0		0.722145	30.7541	0		0.0234813
CTTGAGGTAAGAAGGATGACGACTTTGAGAAGATCAGTGAGAGATCGGAAGAGCACACGTCT	LEVRRMTTLRRSVRDRKSTR	0	35	0		0	30.7541	0		0
CTTGAGGCCTTTCTTACCCGATGACGACTTTGAGAAGATCAGTGAGAGATCGGAAGAGCACA	LEAFLTR*RL*EDQ*EIGRA	0	35	0		0	30.7541	0		0
CTTGAGGCCTTTCTTACCCAGAAGGAGAAAGAAAGCGCCTTGAGGCCTTTCTTACCCAGAAG	LEAFLTQKEKESALRPFLPR	0	35	0		0	30.7541	0		0
CTTGAGGCCTTTCTTACCCAGAAGCATGAGAACTGAAGGGAGAACTGAAGGATGACGACTTT	LEAFLTQKHEN*REN*RMTT	0	35	0		0	30.7541	0		0
CTTGAGGCCTTTCTTACCCAGAAGCAGTGGTAGAACTGGTGGGAGAACTGAAGGATGACGAC	LEAFLTQKQW*NWWEN*RMT	0	35	0		0	30.7541	0		0
CTTGAGGCCTTTCTTACCCAGAAGCAGATGGGTAAGAAAGCAGCCTAGGTAAGCAGGTGGGA	LEAFLTQKQMGKKAA*VSRW	0	35	0		0	30.7541	0		0
CTTGAGGCCTTTCTTACCCAGAAGCAGATCTGCACAAGTCAATACTGTGGGAGAACTGAAGG	LEAFLTQKQICTSQYCGRTE	0	35	0		0	30.7541	0		0
CTTGAGGCCTTTCTTACCCAGAAGCAGAGAGAACTGAAGGATGGGAGAACTGAAGGATGACG	LEAFLTQKQRELKDGRTEG*	0	35	0		0	30.7541	0		0
CTTGAGGCCTTTCTTACCCAGAAGCAGAAAAAAGTGGGAGAACTGAAGGATGACGACTTTGA	LEAFLTQKQKKVGELKDDDF	0	35	0		0	30.7541	0		0
CTTGAGGCCTTTCTTACCCAGAAGAACTGCTTCAGTTCTGGGAGAACTGAAGGATGACGACT	LEAFLTQKNCFSSGRTEG*R	0	35	0		0	30.7541	0		0
CTTGAGGCCTTGAGGCCTTTCTTACCCAGAAGCAGAAAGGTGGGAGAACTGAAGGATGACGA	LEALRPFLPRSRKVGELKDD	0	35	0		0	30.7541	0		0
CTTGAGGCCTGCTGAAGTGGGAGAACTGAAGGATGACGACTTTGAGAAGATCAGTGAGAGAT	LEAC*SGRTEG*RL*EDQ*E	0	35	0		0	30.7541	0		0
CTTGAGATGACGACTTTGAGAAGATCAGTGAGAGATCGGAAGAGCACACGTCTGAACTCCAG	LEMTTLRRSVRDRKSTRLNS	0	35	0		0	30.7541	0		0
CTTGAGTCCTTTCTTACCCAGAAGCAGAAGGTGGGAGAACTGAAGGATGACGACTTTGAGAA	LESFLTQKQKVGELKDDDFE	19	34	754		6.86038	29.8754	273.248		0.229633
CTTGAGGCCTTTCTTACCCAGAAGCATGACTGAAGGATGACGACTTTGAGAAGATCAGTGAG	LEAFLTQKHD*RMTTLRRSV	579	34	0		209.061	29.8754	0		6.99777
CTTGAGGCCCTTCTTACCCAGAACTGAAGGATGACGACTTTGAGAAGATCAGTGAGAGATCG	LEALLTQN*RMTTLRRSVRD	492	34	0		177.648	29.8754	0		5.94629
CTTGAGGCCTTTCTTACCCAGAAGCAGAGAACTGAAGATGAAGATGTGGGAGAACTGAAGGA	LEAFLTQKQRTEDEDVGELK	332	34	0		119.876	29.8754	0		4.01254
CTTGAGGCCTTTCTTACCCAGGTGGGAGAACTAAAGGATGACGACTTTGAGAAGATCAGTGA	LEAFLTQVGELKDDDFEKIS	288	34	0		103.989	29.8754	0		3.48075
CTTGAGGCCTTTCTTACCCAGGTGGGAGAACTGAAGGATGACGACTTTGAAAGATCAGTGAG	LEAFLTQVGELKDDDFERSV	233	34	0		84.1299	29.8754	0		2.81603
CTTGAGGCCCTTCTTACCCAGGTGGGAGAACTGAAGGATGACGACTTTGAGAAGATCAGTGA	LEALLTQVGELKDDDFEKIS	170	34	0		61.3823	29.8754	0		2.05461
CTTGAGGCCTTTCTTACCCAGAAGCAGAGGTGGGAGAACTGAAGGATGACAACTTTGAGAAG	LEAFLTQKQRWEN*RMTTLR	159	34	0		57.4105	29.8754	0		1.92167
CTTGAGGCCTTTCTTACCCAGAAGCAGAAAGGTGGGAGAACTGAAGTATGACGACTTTGAGA	LEAFLTQKQKGGRTEV*RL*	117	34	0		42.2455	29.8754	0		1.41406
CTTGAGGCCTTTCTTACCCAGAAGCAGAGGTGGAGAACTGAAGGATGACGACTTTGAGAAGA	LEAFLTQKQRWRTEG*RL*E	111	34	0		40.0791	29.8754	0		1.34154
CTTGAGGCCTTTCTTGCCCAGAAGGTGGGAGAACTGAAGGATGACGACTTTGAGAAGATCAG	LEAFLAQKVGELKDDDFEKI	104	34	0		37.5516	29.8754	0		1.25694
CTTGAGGCCTTTCTTACCCAGAAGCAGGTGGGAGAACTGAAGGATGACGACTTTGAAGATCA	LEAFLTQKQVGELKDDDFED	88	34	0		31.7744	29.8754	0		1.06356
CTTGAGGCCTCTCTTACCCAGAAGCAGAGAACTGAAGGATGACGACTTTGAGAAGATCAGTG	LEASLTQKQRTEG*RL*EDQ	65	34	0		23.4697	29.8754	0		0.785587
CTTGAGGCTTTTCTTACCCAGAAGGTGGGAGAACTGAAGGATGACGACTTTGAGAAGATCAG	LEAFLTQKVGELKDDDFEKI	44	34	0		15.8872	29.8754	0		0.531782
CTTGAGGCCTTTCTTACCCGGTGGGAGAACTGAAGGATGACGACTTTGAGAAGATCAGTGAG	LEAFLTRWEN*RMTTLRRSV	44	34	0		15.8872	29.8754	0		0.531782
CTTGAGGCCTTTCTTACCCAGAAGCAGAGAACTGAAGAATGACGACTTTGAGAAGATCAGTG	LEAFLTQKQRTEE*RL*EDQ	35	34	0		12.6375	29.8754	0		0.423008
CTTGAGGCCTTTCTTCAGGTGGGAGAACTGAAGGATGACGACTTTGAGAAGATCAGTGAGAG	LEAFLQVGELKDDDFEKISE	29	34	0		10.4711	29.8754	0		0.350493
CTTGAGGCCTTTCTTACCCAGAAGCAGAACTGAAGGATGACGACTTTGAGAAGATCAGTGCG	LEAFLTQKQN*RMTTLRRSV	17	34	0		6.13823	29.8754	0		0.205461
CTTGAGGCCTTTCTTACCCTGACGACTTTGAGAAGATCAGTGAGAGATCGGAAGAGCACACG	LEAFLTLTTLRRSVRDRKST	0	34	0		0	29.8754	0		0
CTTGAGGCCTTTCTTACCCAGAAGGTAAGAAGGTGGGAGAACTGAAGGATGACGACTTTGAG	LEAFLTQKVRRWEN*RMTTL	0	34	0		0	29.8754	0		0
CTTGAGGCCTTTCTTACCCAGAAGCTTCTGGGAGAAGTTCTGGGAGAACTGAAGGATGACGA	LEAFLTQKLLGEVLGELKDD	0	34	0		0	29.8754	0		0
CTTGAGGCCTTTCTTACCCAGAAGCTGCTTGTGGGAGAACTGAAGGATGACGACTTTGAGAA	LEAFLTQKLLVGELKDDDFE	0	34	0		0	29.8754	0		0
CTTGAGGCCTTTCTTACCCAGAAGCCTTTCTTACCCAGAAGGTGGGAGAACTGAAGGATGAC	LEAFLTQKPFLPRRWEN*RM	0	34	0		0	29.8754	0		0
CTTGAGGCCTTTCTTACCCAGAAGCCTTTCTTACCAGAAGGTGGGAGAACTGAAGGATGACG	LEAFLTQKPFLPEGGRTEG*	0	34	0		0	29.8754	0		0
CTTGAGGCCTTTCTTACCCAGAAGCAGTTCAGTGGGAGAACTGAAGGATGACGACTTTGAGA	LEAFLTQKQFSGRTEG*RL*	0	34	0		0	29.8754	0		0
CTTGAGGCCTTTCTTACCCAGAAGCAGGTGGGAGAACTACCCAGAAGCAGGTGGGAGAACTG	LEAFLTQKQVGELPRSRWEN	0	34	0		0	29.8754	0		0
CTTGAGGCCTTTCTTACCCAGAAGCAGGCCTCAAGGTGGGAGAACTGAAGGATGACGACTTT	LEAFLTQKQASRWEN*RMTT	0	34	0		0	29.8754	0		0
CTTGAGGCCTTTCTTACCCAGAAGCAGAGAACTGACAGCGAGTGTCAGAGAACTGAAGGATG	LEAFLTQKQRTDSECQRTEG	0	34	0		0	29.8754	0		0
CTTGAGGCCTTTCTTACCCAGAAGCAGAAGTTCACCCAGAAGGTGGGAGAACTGAAGGATGA	LEAFLTQKQKFTQKVGELKD	0	34	0		0	29.8754	0		0
CTTGAGGCCTTTCTTACCCAGAAGCAGAACTTACCCAGAAGGAGAACTGAAGGATGACGACT	LEAFLTQKQNLPRRRTEG*R	0	34	0		0	29.8754	0		0
CTTGAGGCCTTTCTTACCCAGAAGCAGAACTGCTTCCAGAAGGTGGGAGAACTGAAGGATGA	LEAFLTQKQNCFQKVGELKD	0	34	0		0	29.8754	0		0
CTTGAGGCCTTTCTTACCCAGAAGCAGAAATGGTGGTGGGAGAACTGAAGGATGACGACTTT	LEAFLTQKQKWWWEN*RMTT	0	34	0		0	29.8754	0		0
CTTGAGGCCTTTCTTACCCAGAAGCAGAAAGGCCTTTCTTACCCAGGTGGGAGAACTGAAGG	LEAFLTQKQKGLSYPGGRTE	0	34	0		0	29.8754	0		0
CTTGAGGCCTTTCTTACCCAGAAGCAGAAAAATTGGCACCATACAATTGCTTTGAGTCTTTA	LEAFLTQKQKNWHHTIALSL	0	34	0		0	29.8754	0		0
CTTGAGGCCTTTCTTACCCAGAAGCACTGGGTAAGAAACTTCAGTTCAGTTGTGGGAGAACT	LEAFLTQKHWVRNFSSVVGE	0	34	0		0	29.8754	0		0
CTTGAGGCCTTTCTTACCCAGAAGAAAGAACTGGGAGAACTGAAGGATGACGACTTTGAGAA	LEAFLTQKKELGELKDDDFE	0	34	0		0	29.8754	0		0
CTTGAGGCCTTTCTTACAGAAGGTGGGAGAACTGAAGGATGACGACTTTGAGAAGATCAGTG	LEAFLTEGGRTEG*RL*EDQ	0	34	0		0	29.8754	0		0
CTTGAGGCCTTTCTTACCCAGAAGCAGAAGGTGGCAGAACTGAAGGATGACGACTTTGAGAA	LEAFLTQKQKVAELKDDDFE	13	33	228		4.69394	28.9967	82.6266		0.161878
CTTGAGGCCTTTCTTACCCAGAAGAAGGAGGGAGAACTGAAGGATGACGACTTTGAGAAGAT	LEAFLTQKKEGELKDDDFEK	16	33	1		5.77716	28.9967	0.362397		0.199235
CTTGAGGCCTTTCTTACCCAGAACTGAAGGATGACGACTTTGAGAAGATCAGTGAGAGATAG	LEAFLTQN*RMTTLRRSVRD	139	33	0		50.1891	28.9967	0		1.73085
CTTGAGGCCTTTCTTACCCAGAAGCAGAGAACTAAAGGATGACGACTTTGAGAAGATCAGTG	LEAFLTQKQRTKG*RL*EDQ	136	33	0		49.1059	28.9967	0		1.6935
CTTGAGGCCTTTCATACCCAGAAGCAGGTGGGAGAACTGAAGGATGACGACTTTGAGAAGAT	LEAFHTQKQVGELKDDDFEK	108	33	0		38.9958	28.9967	0		1.34484
CTTGAGGCCTTTCTTACCCAGAAGGTGGGAGAACTGCAGGATGACGACTTTGAGAAGATCAG	LEAFLTQKVGELQDDDFEKI	94	33	0		33.9408	28.9967	0		1.17051
CTTGAGGCCTTTCTTCCCCAGAACTGAAGGATGACGACTTTGAGAAGATCAGTGAGAGATCG	LEAFLPQN*RMTTLRRSVRD	64	33	0		23.1086	28.9967	0		0.79694
CTTGAGGCCTTTCTTACCCAGAAGCAGGTGGGAGAACTGAAGGATGACGACTCTGAGAAGAT	LEAFLTQKQVGELKDDDSEK	54	33	0		19.4979	28.9967	0		0.672418
CTTGTGGCCTTTCTTACCCAGAAGGTGGGAGAACTGAAGGATGACGACTTTGAGAAGATCAG	LVAFLTQKVGELKDDDFEKI	43	33	0		15.5261	28.9967	0		0.535444
CTTGAGGCCTTTCTTAACCAGAAGGTGGGAGAACTGAAGGATGACGACTTTGAGAAGATCAG	LEAFLNQKVGELKDDDFEKI	12	33	0		4.33287	28.9967	0		0.149426
CTTGAGGACGACTTTGAGAAGATCAGTGAGAGATCGGAAGAGCACACGTCTGAACTCCAGTC	LEDDFEKISERSEEHTSELQ	12	33	0		4.33287	28.9967	0		0.149426
CTTGAGGCCTTTCTTACCCAGAAGGATGACGACTTTGAGAAGATCAGTGAGAGACGGAAGAG	LEAFLTQKDDDFEKISERRK	8	33	0		2.88858	28.9967	0		0.0996175
CTTGAGGCCTTTCTTACCCAGAAGGATGACGACTTGAGAAGATCAGTGAGAGATCGGAAGAG	LEAFLTQKDDDLRRSVRDRK	7	33	0		2.52751	28.9967	0		0.0871653
CTTGAGGCCTTTCTTACCCAGAAGCCTCAAGTGGGAGAACTGAAGGATGACGACTTTGAGAA	LEAFLTQKPQVGELKDDDFE	6	33	0		2.16644	28.9967	0		0.0747131
CTTGAGGCCTTTCTTACCAGAAGCAGAAGCAGGTGGGAGAACTGAAGGATGACGACTTTGAG	LEAFLTRSRSRWEN*RMTTL	5	33	0		1.80536	28.9967	0		0.062261
CTTGAGGCTGACGACTTTGAGAAGATCAGTGAGAGATCGGAAGAGCACACGTCTGAACTCCA	LEADDFEKISERSEEHTSEL	3	33	0		1.08322	28.9967	0		0.0373566
CTTGAGGCCTTTCTTACCCAGAAGCAGAAGAAGAACTGAAGGATGACGACTTTGAGAAGATC	LEAFLTQKQKKN*RMTTLRR	3	33	0		1.08322	28.9967	0		0.0373566
CTTGAGGCCTTTCTTCCCAAGAAGCAGGTGGGAGAACTGAAGGATGACGACTTTGAGAAGAT	LEAFLPKKQVGELKDDDFEK	1	33	0		0.361073	28.9967	0		0.0124522
CTTGAGGCCTTTCTGACGGATGACGACTTTGAGAAGATCAGTGAGAGATCGGAAGAGCACAC	LEAFLTDDDFEKISERSEEH	1	33	0		0.361073	28.9967	0		0.0124522
CTTTGAAGGTGGGAGAACTGAAGGATGACGACTTTGAGAAGATCAGTGAGAGATCGGAAGAG	L*RWEN*RMTTLRRSVRDRK	0	33	0		0	28.9967	0		0
CTTGAGGCCTTTTTGAGAACTGAAGGATGACGACTTTGAGAAGATCAGTGAGAGATCGGAAG	LEAFLRTEG*RL*EDQ*EIG	0	33	0		0	28.9967	0		0
CTTGAGGCCTTTTAGGTGGGAGAACTGAAGGATGACGACTTTGAGAAGATCAGTGAGAGATC	LEAF*VGELKDDDFEKISER	0	33	0		0	28.9967	0		0
CTTGAGGCCTTTCTTACTGGGTAAGAAGCCTTTCTTACCCAGGTGGGAGAACTGAAGGATGA	LEAFLTG*EAFLTQVGELKD	0	33	0		0	28.9967	0		0
CTTGAGGCCTTTCTTACCCATGGGAGAACTGAAGGATGACGACTTTGAGAAGATCAGTGAGA	LEAFLTHGRTEG*RL*EDQ*	0	33	0		0	28.9967	0		0
CTTGAGGCCTTTCTTACCCAGAAGTGGGTAAGTTCTCCACTGAAGTGGGAGAACTGAAGGAT	LEAFLTQKWVSSPLKWEN*R	0	33	0		0	28.9967	0		0
CTTGAGGCCTTTCTTACCCAGAAGGTGGGATGACGACTTTGAGAAGATCAGTGAGAGATCGG	LEAFLTQKVG*RL*EDQ*EI	0	33	0		0	28.9967	0		0
CTTGAGGCCTTTCTTACCCAGAAGGTAAGAACTGAAGGATGACGACTTTGAGAAGATCAGTG	LEAFLTQKVRTEG*RL*EDQ	0	33	0		0	28.9967	0		0
CTTGAGGCCTTTCTTACCCAGAAGGCCTTTCTTACCCAGAAGGTGGGAGAACTGAAGGATGA	LEAFLTQKAFLTQKVGELKD	0	33	0		0	28.9967	0		0
CTTGAGGCCTTTCTTACCCAGAAGCTGTGGGAGACCTTGAACAGGTGGGAGAACTGAAGGAT	LEAFLTQKLWETLNRWEN*R	0	33	0		0	28.9967	0		0
CTTGAGGCCTTTCTTACCCAGAAGCATCCTTCAGGTGGGAGAACTGAAGGATGACGACTTTG	LEAFLTQKHPSGGRTEG*RL	0	33	0		0	28.9967	0		0
CTTGAGGCCTTTCTTACCCAGAAGCAGGTGGGTAAGGTGGGAGAACTGAAGGATGACGACTT	LEAFLTQKQVGKVGELKDDD	0	33	0		0	28.9967	0		0
CTTGAGGCCTTTCTTACCCAGAAGCAGGGAGAACTGAAGGAAGGGAGAACAGAAGTGGGAGA	LEAFLTQKQGELKEGRTEVG	0	33	0		0	28.9967	0		0
CTTGAGGCCTTTCTTACCCAGAAGCAGACCGACTTTGAGAAGATCAGTGAGAGATCGGAAGA	LEAFLTQKQTDFEKISERSE	0	33	0		0	28.9967	0		0
CTTGAGGCCTTTCTTACCCAGAAGCAGAAGGTGAAGAGAACTGAAGGATGACGACTTTGAGA	LEAFLTQKQKVKRTEG*RL*	0	33	0		0	28.9967	0		0
CTTGAGGCCTTTCTTACCCAGAAGCAGAACTTCTTGTGGGAGAACTGAAGGATGACGACTTT	LEAFLTQKQNFLWEN*RMTT	0	33	0		0	28.9967	0		0
CTTGAGGCCTTTCTTACCCAGAAGCAGAACTGGGATGACGACTTTGAGAAGATCAGTGAGAG	LEAFLTQKQNWDDDFEKISE	0	33	0		0	28.9967	0		0
CTTGAGGCCTTTCTTACCCAGAAGCAGAACATGCTGAATGCACTGCAGGCAGGCTGCTCTCT	LEAFLTQKQNMLNALQAGCS	0	33	0		0	28.9967	0		0
CTTGAGGCCTTTCTTACCCAGAAGCAATGACGACTTTGAGAAGATCAGTGAGAGATCGGAAG	LEAFLTQKQ*RL*EDQ*EIG	0	33	0		0	28.9967	0		0
CTTGAGGCCTTTCTTACCCAGAAGAAACTGAAGGTGGGAGAACTGAAGGATGACGACTTTGA	LEAFLTQKKLKVGELKDDDF	0	33	0		0	28.9967	0		0
CTTGAGGCCTTTCTTACCACAGAAGGTGGGAGAACTGAAGGATGACGACTTTGAGAAGATCA	LEAFLTTEGGRTEG*RL*ED	0	33	0		0	28.9967	0		0
CTTAGGTGGGAGAACTGAAGGATGACGACTTTGAGAAGATCAGTGAGAGATCGGAAGAGCAC	LRWEN*RMTTLRRSVRDRKS	0	33	0		0	28.9967	0		0
CTTGAGGCCTTTCTTACCCAGAAGCAGAAGGTGGGAGAACTGAAGGATGACGACTTGGAGAA	LEAFLTQKQKVGELKDDDLE	0	32	539		0	28.118	195.332		0
CTTGAGGCCTTTCTTACCCAGAAATAGAAGGTGGGAGAACTAAAGGATGACGACTTTGAGAA	LEAFLTQK*KVGELKDDDFE	62	32	297		22.3865	28.118	107.632		0.796162
CTTGAGGCCTTTCTTACCCAGAACTGAGGGATGACGACTTTGAGAAGATCAGTGAGAGATCG	LEAFLTQN*GMTTLRRSVRD	532	32	0		192.091	28.118	0		6.83158
CTTGAGGCCTTCCTTACCCAGAACTGAAGGATGACGACTTTGAGAAGATCAGTGAGAGATCG	LEAFLTQN*RMTTLRRSVRD	366	32	0		132.153	28.118	0		4.69992
CTTGAGGCCTTTCTTACCCAGAAGCAGAAAGGTGGGAGAACTGAAGGATGACGACTTAGAGA	LEAFLTQKQKGGRTEG*RLR	187	32	0		67.5206	28.118	0		2.40133
CTTGAGGCCTTTCTTACCCAGGTGGGAGAACTGGAGGATGACGACTTTGAGAAGATCAGTGA	LEAFLTQVGELEDDDFEKIS	182	32	0		65.7152	28.118	0		2.33712
CTTGAGGCCTTTCTTACCCAGAAGCAGAGGTGGGAGAACTGAAGGATGACGACTTTGAGAAT	LEAFLTQKQRWEN*RMTTLR	167	32	0		60.2991	28.118	0		2.1445
CTTGAGGCCTTTCTCACCCAGAAGCAGAGGTGGGAGAACTGAAGGATGACGACTTTGAGAAG	LEAFLTQKQRWEN*RMTTLR	166	32	0		59.9381	28.118	0		2.13166
CTTGGGGCCTTTCTTACCCAGGTGGGAGAACTGAAGGATGACGACTTTGAGAAGATCAGTGA	LGAFLTQVGELKDDDFEKIS	160	32	0		57.7716	28.118	0		2.05461
CTTGAGGCCTTTCTTACCCAGAAGCAGAAAGGTGGGAGAACTGAAGGTTGACGACTTTGAGA	LEAFLTQKQKGGRTEG*RL*	115	32	0		41.5234	28.118	0		1.47675
TTTGAGGCCTTTCTTACCCAGAAGCAGAGGTGGGAGAACTGAAGGATGACGACTTTGAGAAG	FEAFLTQKQRWEN*RMTTLR	80	32	0		28.8858	28.118	0		1.02731
CTTGAGGCCTTTCTTACCCAGAAGCAGAGGAACTGAAGGATGACGACTTTGAGAAGATCAGT	LEAFLTQKQRN*RMTTLRRS	52	32	0		18.7758	28.118	0		0.667749
CTTGAGGCCTTTCTTACACAGAAGCAGAGGTGGGAGAACTGAAGGATGACGACTTTGAGAAG	LEAFLTQKQRWEN*RMTTLR	47	32	0		16.9704	28.118	0		0.603542
CTTGAGGCCTTTCTTACCCAGAAGCAGAGTGGGATGAAGGATGACGACTTTGAGAAGATCAG	LEAFLTQKQSGMKDDDFEKI	30	32	0		10.8322	28.118	0		0.38524
CTTGAGGCCTTTCTTACCCAGAAGCAGAACTGAAAGATGACGACTTTGAGAAGATCAGTGAG	LEAFLTQKQN*KMTTLRRSV	29	32	0		10.4711	28.118	0		0.372398
CTTGAGGCCTTTCTTACCCAGAAGGATGACGACTTTGAGAAGATCATGAGAGATCGGAAGAG	LEAFLTQKDDDFEKIMRDRK	13	32	0		4.69394	28.118	0		0.166937
CTTGAGGCCTTTCTTACCCAGAAGCAGAACGGCGGGAGAACTGAAGGATGACGACTTTGAGA	LEAFLTQKQNGGRTEG*RL*	12	32	0		4.33287	28.118	0		0.154096
CTTGAGGCCTTGATGACGACTTTGAGAAGATCAGTGAGAGATCGGAAGAGCACACGTCTGAA	LEALMTTLRRSVRDRKSTRL	10	32	0		3.61073	28.118	0		0.128413
CTTGAGGCCTTTCTTACCCAGAAGCAGTGAGAGAACTGAAGGATGACGACTTTGAGAAGATC	LEAFLTQKQ*EN*RMTTLRR	3	32	0		1.08322	28.118	0		0.038524
CTTGAGGCCTTTCTTACCCAGAAAGAAAGTGGGAGAACTGAAGGATGACGACTTTGAGAAGA	LEAFLTQKESGRTEG*RL*E	3	32	0		1.08322	28.118	0		0.038524
CTTGAGGCCTTTCTTACCAAGAAGAAGGTGGGAGAACTGAAGGATGACGACTTTGAGAAGAT	LEAFLTKKKVGELKDDDFEK	2	32	0		0.722145	28.118	0		0.0256826
TGGGTAAGAAAGGCCTCAAGGTGGGAGAACTGAAGGATGACGACTTTGAGAAGATCAGTGAG	WVRKASRWEN*RMTTLRRSV	0	32	0		0	28.118	0		0
CTTGAGGCGAAGGATGACGACTTTGAGAAGATCAGTGAGAGATCGGAAGAGCACACGTCTGA	LEAKDDDFEKISERSEEHTS	0	32	0		0	28.118	0		0
CTTGAGGCCTTTCTTGGTGGGAGAACTGAAGGATGACGACTTTGAGAAGATCAGTGAGAGAT	LEAFLGGRTEG*RL*EDQ*E	0	32	0		0	28.118	0		0
CTTGAGGCCTTTCTTACCCAGAGAAAGGTGGGAGAACTGAAGGATGACGACTTTGAGAAGAT	LEAFLTQRKVGELKDDDFEK	0	32	0		0	28.118	0		0
CTTGAGGCCTTTCTTACCCAGACTTTCTTACCAGACTTTGAGAAGATCAGTGAGAGATCGGA	LEAFLTQTFLPDFEKISERS	0	32	0		0	28.118	0		0
CTTGAGGCCTTTCTTACCCAGAAGGCCTTACCCAGAAGGCCTTTCTTAACTGAAGGATGACG	LEAFLTQKALPRRPFLTEG*	0	32	0		0	28.118	0		0
CTTGAGGCCTTTCTTACCCAGAAGCAGTGGAGAGAACTGAAGGATGACGACTTTGAGAAGAT	LEAFLTQKQWRELKDDDFEK	0	32	0		0	28.118	0		0
CTTGAGGCCTTTCTTACCCAGAAGCAGTAATGACGACTTTGAGAAGATCAGTGAGAGATCGG	LEAFLTQKQ**RL*EDQ*EI	0	32	0		0	28.118	0		0
CTTGAGGCCTTTCTTACCCAGAAGCAGGTGGGAGAAGCAGGTGGGAGAACTGAAGGATGACG	LEAFLTQKQVGEAGGRTEG*	0	32	0		0	28.118	0		0
CTTGAGGCCTTTCTTACCCAGAAGCAGGTGGAGAACTGAAGGTTGACGACTTTGAGAAGATC	LEAFLTQKQVEN*RLTTLRR	0	32	0		0	28.118	0		0
CTTGAGGCCTTTCTTACCCAGAAGCAGAGTAAGTGGGAGAACTGAAGGATGACGACTTTGAG	LEAFLTQKQSKWEN*RMTTL	0	32	0		0	28.118	0		0
CTTGAGGCCTTTCTTACCCAGAAGCAGACCCGGAGATAAATCTCTGCCGCAGAACAGCTGGG	LEAFLTQKQTRR*ISAAEQL	0	32	0		0	28.118	0		0
CTTGAGGCCTTTCTTACCCAGAAGCAGAAGCAGAAGCAGAAAGGTGGGAGAACTGAAGGATG	LEAFLTQKQKQKQKGGRTEG	0	32	0		0	28.118	0		0
CTTGAGGCCTTTCTTACCCAGAAGCAGAAGAACTTCTGCTTCTTCTTCTTGGGAGAACTGAA	LEAFLTQKQKNFCFFFLGEL	0	32	0		0	28.118	0		0
CTTGAGGCCTTTCTTACCCAGAAGCAGAACTTCTGCTTCTGGAGAACTGAAGGATGACGACT	LEAFLTQKQNFCFWRTEG*R	0	32	0		0	28.118	0		0
CTTGAGGCCTTTCTTACCCAGAAGCACTGGGTATGACGACTTTGAGAAGATCAGTGAGAGAT	LEAFLTQKHWV*RL*EDQ*E	0	32	0		0	28.118	0		0
CTTGAGGCCTTTCTTACCCAGAAGCACTGAACTGAAGGATGACGACTTTGAGAAGATCAGTG	LEAFLTQKH*TEG*RL*EDQ	0	32	0		0	28.118	0		0
CTTGAGGCCTTTCTTACCCAGAAGAACTGAAGGATGGGACTTTGAGAAGATCAGTGAGAGAT	LEAFLTQKN*RMGL*EDQ*E	0	32	0		0	28.118	0		0
CTTGAGGCCTTTCTTACCCAGAACTGAAGAACTGAAGGATGACGACTTTGAGAAGATCAGTG	LEAFLTQN*RTEG*RL*EDQ	0	32	0		0	28.118	0		0
CTTGAGGCCTTTCTTACCCAGAAAGAAAAACTGAAAGAACTGAAGGATGACGACTTTGAGAA	LEAFLTQKEKLKELKDDDFE	0	32	0		0	28.118	0		0
CTTGAGGCCTTTCGGAGAACTGAAGGATGACGACTTTGAGAAGATCAGTGAGAGATCGGAAG	LEAFRRTEG*RL*EDQ*EIG	0	32	0		0	28.118	0		0
CTTGAGGCCTTGGAGAACTGAAGGATGACGACTTTGAGAAGATCAGTGAGAGATCGGAAGAG	LEALEN*RMTTLRRSVRDRK	0	32	0		0	28.118	0		0
CTTGAGGCCTGGAGAACTGAAGGATGACGACTTTGAGAAGATCAGTGAGAGATCGGAAGAGC	LEAWRTEG*RL*EDQ*EIGR	0	32	0		0	28.118	0		0
CTTGAGGCCTTTCTTACCCAGAAGCAGAACGTGGGAGAACTGAAGGATGACGACTTTGAGAA	LEAFLTQKQNVGELKDDDFE	5	31	124		1.80536	27.2393	44.9373		0.0662778
CTTGAGGCCTTTCTTACCCAGAAGCAGAAGGAAGGAGAACTGAAGGATGACGACTTTGAGAA	LEAFLTQKQKEGELKDDDFE	1	31	22		0.361073	27.2393	7.97274		0.0132556
CTTGAGGCCTTTCTTACCCAGAACTGAAGGATGGCGACTTTGAGAAGATCAGTGAGAGATCG	LEAFLTQN*RMATLRRSVRD	444	31	0		160.316	27.2393	0		5.88547
CTTGAGGCCTTTCTTACCCAGAACTAAAGGATGACGACTTTGAGAAGATCAGTGAGAGATCG	LEAFLTQN*RMTTLRRSVRD	344	31	0		124.209	27.2393	0		4.55991
CTTGAGGCCTTTCTTACCCAGAAGCCTCAGGTGGGAGAACTGAAGGATGACGACTTTGAGAA	LEAFLTQKPQVGELKDDDFE	170	31	0		61.3823	27.2393	0		2.25344
CTTGAGGCCTTTCTTACTCAGAAGCAGAGGTGGGAGAACTGAAGGATGACGACTTTGAGAAG	LEAFLTQKQRWEN*RMTTLR	119	31	0		42.9676	27.2393	0		1.57741
CTTGAGGCCTTTCTTACCCAGAAGCAGGTGGGAGAACTGAAGGATGACGACTTTGAGAATAT	LEAFLTQKQVGELKDDDFEN	109	31	0		39.3569	27.2393	0		1.44486
CTTGAGGCCTTTCTTACCCAGAAGCAGGTGGGAGAACTGAAGGATGACGACTTTGAGAGGAT	LEAFLTQKQVGELKDDDFER	87	31	0		31.4133	27.2393	0		1.15323
CTTGAGGCCTTTCTTACCCAGAAGAACTGAAGGTGGGAGAACTGAAGGATGACGACTTTGAG	LEAFLTQKN*RWEN*RMTTL	62	31	0		22.3865	27.2393	0		0.821845
CTTGAGGGATGACGACTTTGAGAAGATCAGTGAGAGATCGGAAGAGCACACGTCTGAACTCC	LEG*RL*EDQ*EIGRAHV*T	40	31	0		14.4429	27.2393	0		0.530222
CTTGAGGCCTTTCTTACCCAGAAGCAGAACTGAAGGATGACGACTTTGAAAAGATCAGTGAG	LEAFLTQKQN*RMTTLKRSV	40	31	0		14.4429	27.2393	0		0.530222
CTTGAGGCCTTTCTTACCAGAAAGCAGGTGGGAGAACTGAAGGATGACGACTTTGAGAAGAT	LEAFLTRKQVGELKDDDFEK	35	31	0		12.6375	27.2393	0		0.463945
CTTGAGGTGGGAGAACTGAAGGATGACGACTTTGAGAAGATCATGAGAGATCGGAAGAGCAC	LEVGELKDDDFEKIMRDRKS	30	31	0		10.8322	27.2393	0		0.397667
CTTGAGGCCTTTCTTACCCAGAAGCAGGAGAGAACTGAAGGATGACGACTTTGAGAAGATCA	LEAFLTQKQERTEG*RL*ED	13	31	0		4.69394	27.2393	0		0.172322
CTTGAGGCCTTTCTTACCCAGAAGCAGACGGATGACGACTTTGAGAAGATCAGTGAGAGATC	LEAFLTQKQTDDDFEKISER	12	31	0		4.33287	27.2393	0		0.159067
CTTGAGGCCTTTCTTACCCAGAAGCAGATAGGAGGGAGAACTGAAGGATGACGACTTTGAGA	LEAFLTQKQIGGRTEG*RL*	10	31	0		3.61073	27.2393	0		0.132556
CTTGAGGCCTTTCTTACCCAGAAGCAGAGAACTGAAGAGATGAAAAGAAATGTGGGAGAACT	LEAFLTQKQRTEEMKRNVGE	10	31	0		3.61073	27.2393	0		0.132556
CTTGAGGCCTTTCTTACCCAGAAGCAGAACTTCTAGAACTGAAGGATGACGACTTTGAGAAG	LEAFLTQKQNF*N*RMTTLR	10	31	0		3.61073	27.2393	0		0.132556
CTTGAGGCCTTTCTTACCCAGAAGCAGAACTGAAGGAAGACGACTTTGAGAAGATCAGTGAG	LEAFLTQKQN*RKTTLRRSV	5	31	0		1.80536	27.2393	0		0.0662778
CTTGAGGTGTGAGAACTGAAGGATGACGACTTTGAGAAGATCAGTGAGAGATCGGAAGAGCA	LEV*ELKDDDFEKISERSEE	3	31	0		1.08322	27.2393	0		0.0397667
CTTGAGGCCTTTCTTACCCAGAAGCAGGGAGAGAACTGAAGGATGACGACTTTGAGAAGATC	LEAFLTQKQGEN*RMTTLRR	1	31	0		0.361073	27.2393	0		0.0132556
CTTGAGGCCTTTCTTACCCAGAAGTTTTCAGTGGGAGAACTGAAGGATGACGACTTTGAGAA	LEAFLTQKFSVGELKDDDFE	0	31	0		0	27.2393	0		0
CTTGAGGCCTTTCTTACCCAGAAGCTGGAGCTTTCTTTCCATGATAGGAGTACTTCTTTGGG	LEAFLTQKLELSFHDRSTSL	0	31	0		0	27.2393	0		0
CTTGAGGCCTTTCTTACCCAGAAGCATGACGCTTCCTTACCCTGAAGGATGACGACTTTGAG	LEAFLTQKHDASLP*RMTTL	0	31	0		0	27.2393	0		0
CTTGAGGCCTTTCTTACCCAGAAGCAGATGACTTACCCAGAAGGATGACGACTTTGAGAAGA	LEAFLTQKQMTYPEG*RL*E	0	31	0		0	27.2393	0		0
CTTGAGGCCTTTCTTACCCAGAAGCAGATGAAGGTGGGAGAACTGAAGGATGACGACTTTGA	LEAFLTQKQMKVGELKDDDF	0	31	0		0	27.2393	0		0
CTTGAGGCCTTTCTTACCCAGAAGCAGACTGAAGGTGGGAGAACTGAAGGATGACGACTTTG	LEAFLTQKQTEGGRTEG*RL	0	31	0		0	27.2393	0		0
CTTGAGGCCTTTCTTACCCAGAAGCAGAAGGTAAGGTGGGAGAACTGAAGGATGACGACTTT	LEAFLTQKQKVRWEN*RMTT	0	31	0		0	27.2393	0		0
CTTGAGGCCTTTCTTACCCAGAAGCAGAACTTGAACTGAAGGATGACGACTTTGAGAAGATC	LEAFLTQKQNLN*RMTTLRR	0	31	0		0	27.2393	0		0
CTTGAGGCCTTTCTTACCCAGAAGCAGAACTTACCCAGAAGTGGGAGAACTGAAGGATGACG	LEAFLTQKQNLPRSGRTEG*	0	31	0		0	27.2393	0		0
CTTGAGGCCTTTCTTACCCAGAAGCAGAACTTACCCAGAAGGGAGAACTGAAGGATGACGAC	LEAFLTQKQNLPRREN*RMT	0	31	0		0	27.2393	0		0
CTTGAGGCCTTTCTTACCCAGAAGCAGAAAGCGCCTTGAGGCCTTTCTTACCCAGGTGGGAC	LEAFLTQKQKAP*GLSYPGG	0	31	0		0	27.2393	0		0
CTTGAGGCCTTTCTTACCCAGAAAGGCCAGGTGGGAGAACTGAAGGATGACGACTTTGAGAA	LEAFLTQKGQVGELKDDDFE	0	31	0		0	27.2393	0		0
CTTGAGGCCTTTCTTACCCAGAAAGGATGACGACTTTGAGAAGATCAGTGAGAGATCGGAAG	LEAFLTQKG*RL*EDQ*EIG	0	31	0		0	27.2393	0		0
CTTGAGGCCTTTCAGAGAACTGAAGGATGACGACTTTGAGAAGATCAGTGAGAGATCGGAAG	LEAFQRTEG*RL*EDQ*EIG	0	31	0		0	27.2393	0		0
CTTGAGGCCTTGAGCAGGTGGGAGAACTGAAGGATGACGACTTTGAGAAGATCAGTGAGAGA	LEALSRWEN*RMTTLRRSVR	0	31	0		0	27.2393	0		0
CTTGAGGCCTTACGACTTTGAGAAGATCAGTGAGAGATCGGAAGAGCACACGTCTGAACTCC	LEALRL*EDQ*EIGRAHV*T	0	31	0		0	27.2393	0		0
CTTGAGGCCTTTCTTACGCAGAAGCAGAAGGTGGGAGAACTGAAGGATGACGACTTTGAGAA	LEAFLTQKQKVGELKDDDFE	8	30	245		2.88858	26.3606	88.7874		0.109579
CTTGAGGCCTTTCTTACCCAGAAGCAGAAGGTGGGAGAACTGAAGGATGACGACTTTGTGAA	LEAFLTQKQKVGELKDDDFV	8	30	191		2.88858	26.3606	69.2179		0.109579
CTTGAGGCCTTTCTTACCCAGGCGGGAGAACTGAAGGATGACGACTTTGAGAAGATCAGTGA	LEAFLTQAGELKDDDFEKIS	1249	30	0		450.98	26.3606	0		17.1081
CTTGAGGCCTTTCTTACCCAGAACTGAAGGATGACGACTTGAGAAGATCAGTGAGAGATCGG	LEAFLTQN*RMTT*EDQ*EI	495	30	0		178.731	26.3606	0		6.78022
CTTGAGGCCTTTCTTACCCAGGTGGGAGAACTGAAGGATGACGACTTGAGAAGATCAGTGAG	LEAFLTQVGELKDDDLRRSV	209	30	0		75.4642	26.3606	0		2.86276
CTTGAGGCCTTTCTTACCCAGGTGGGAGAACTGAGGGATGACGACTTTGAGAAGATCAGTGA	LEAFLTQVGELRDDDFEKIS	174	30	0		62.8266	26.3606	0		2.38335
CTTGAGGCCTTTCTTACCCAGAAGCAGAGGTGGGAGAACTGAAGGATGACGACCTTGAGAAG	LEAFLTQKQRWEN*RMTTLR	164	30	0		59.2159	26.3606	0		2.24638
CTTGAGGCCTTTCTTACCCAGAAGCAGGTGGGAGAACTGAAGGATGACGACTTTAGAAGATC	LEAFLTQKQVGELKDDDFRR	108	30	0		38.9958	26.3606	0		1.47932
CTTGAGGCCTTTCTTACCCAGAAGGTGGGAGAACTGAAGGATGACGATTTTGAGAAGATCAG	LEAFLTQKVGELKDDDFEKI	100	30	0		36.1073	26.3606	0		1.36974
CTTGAGGCCTTCCTTACCCAGAAGCAGAGAACTGAAGGATGACGACTTTGAGAAGATCAGTG	LEAFLTQKQRTEG*RL*EDQ	84	30	0		30.3301	26.3606	0		1.15058
CTTGAGGCCTTTCTTACCCAGAAGGTGGGAGAACTGACGGATGACGACTTTGAGAAGATCAG	LEAFLTQKVGELTDDDFEKI	64	30	0		23.1086	26.3606	0		0.876634
CCTGAGGCCTTTCTTACCCAGAAGCAGAGAACTGAAGGATGACGACTTTGAGAAGATCAGTG	PEAFLTQKQRTEG*RL*EDQ	55	30	0		19.859	26.3606	0		0.753358
CTTGAGGCCTTTCTTACCCAGGAGCAGAGAACTGAAGGATGACGACTTTGAGAAGATCAGTG	LEAFLTQEQRTEG*RL*EDQ	46	30	0		16.6093	26.3606	0		0.630081
CTTGAGGCCTTTCTTACCCAGAAGCAGAACTTACCCAGAAGCAGGTGGGAGAACTGAAGGAT	LEAFLTQKQNLPRSRWEN*R	11	30	0		3.9718	26.3606	0		0.150672
CTTGAGGCCTTTCTTACCCAGAAGCAGAACTGGGTAAGAACTGAAGGATGACGACTTTGAGA	LEAFLTQKQNWVRTEG*RL*	11	30	0		3.9718	26.3606	0		0.150672
CTTGAGGCCTTTCTTACCCAGAAGGATGACGACTTTGAGAAGACAGTGAGAGATCGGAAGAG	LEAFLTQKDDDFEKTVRDRK	4	30	0		1.44429	26.3606	0		0.0547896
CTTGAGGCCTTTCTTACCCAGAAGCAGAAGCAGAAGCAGGTGGGAGAACTGAAGGATGACGA	LEAFLTQKQKQKQVGELKDD	2	30	0		0.722145	26.3606	0		0.0273948
CTTGAGGCCTTTCTTACCCAGAAGGATAAGGGAGAACTGAAGGATGACGACTTTGAGAAGAT	LEAFLTQKDKGELKDDDFEK	1	30	0		0.361073	26.3606	0		0.0136974
CTTGAGGCCTTTCTTACCCAGAAGCTTCTGGTAAGAACTGAAGGATGACGACTTTGAGAAGA	LEAFLTQKLLVRTEG*RL*E	0	30	0		0	26.3606	0		0
CTTGAGGCCTTTCTTACCCAGAAGCTTACCTGAAGGATGACGACTTTGAGAAGATCAGTGAG	LEAFLTQKLT*RMTTLRRSV	0	30	0		0	26.3606	0		0
CTTGAGGCCTTTCTTACCCAGAAGCAGTAAGAAGGATGACGACTTTGAGAAGATCAGTGAGA	LEAFLTQKQ*EG*RL*EDQ*	0	30	0		0	26.3606	0		0
CTTGAGGCCTTTCTTACCCAGAAGCAGTAAGAAACTTACTGAAGGATGACGACTTTGAGAAG	LEAFLTQKQ*ETY*RMTTLR	0	30	0		0	26.3606	0		0
CTTGAGGCCTTTCTTACCCAGAAGCAGGTAGGAGTGCACCTAGGTGGGAGAACTGAAGGATG	LEAFLTQKQVGVHLGGRTEG	0	30	0		0	26.3606	0		0
CTTGAGGCCTTTCTTACCCAGAAGCAGATGACGACTTTGACTGAAGGATGACGACTTTGAGA	LEAFLTQKQMTTLTEG*RL*	0	30	0		0	26.3606	0		0
CTTGAGGCCTTTCTTACCCAGAAGCAGAGAACTTACCAGAAGCAAGGTGGGAGAACTGAAGG	LEAFLTQKQRTYQKQGGRTE	0	30	0		0	26.3606	0		0
CTTGAGGCCTTTCTTACCCAGAAGCAGAGAACAGGTGGGAGAACTGAAGGATGACGACTTTG	LEAFLTQKQRTGGRTEG*RL	0	30	0		0	26.3606	0		0
CTTGAGGCCTTTCTTACCCAGAAGCAGAACTTTCTTACCCAGAAGCAGAGGTGGGAGAACTG	LEAFLTQKQNFLTQKQRWEN	0	30	0		0	26.3606	0		0
CTTGAGGCCTTTCTTACCCAGAAGCAGAACTTCACTGAAGGATGACGACTTTGAGAAGATCA	LEAFLTQKQNFTEG*RL*ED	0	30	0		0	26.3606	0		0
CTTGAGGCCTTTCTTACCCAGAAGCAGAACTGGATGACGACTTTGAGAAGATCAGTGAGAGA	LEAFLTQKQNWMTTLRRSVR	0	30	0		0	26.3606	0		0
CTTGAGGCCTTTCTTACCCAGAAGCAGAACTGAAGTATGTGGGAGAACTGAAGGATGACGAC	LEAFLTQKQN*SMWEN*RMT	0	30	0		0	26.3606	0		0
CTTGAGGCCTTTCTTACCCAGAAGCAGAACACATGGGAGAACTGAAGGATGACGACTTTGAG	LEAFLTQKQNTWEN*RMTTL	0	30	0		0	26.3606	0		0
CTTGAGGCCTGTATTCCAAAAGAGGACCAAGGGTAGATAGGAAAGGGAAGTCCAGCTCTACA	LEACIPKEDQG*IGKGSPAL	0	30	0		0	26.3606	0		0
CTAGGATGACGACTTTGAGAAGATCAGTGAGAGATCGGAAGAGCACACGTCTGAACTCCAGT	LG*RL*EDQ*EIGRAHV*TP	0	30	0		0	26.3606	0		0
CTTGAGGCCTTTCTTACCCAGAAGCAGCAGGAGGGAGAACTGAAGGATGACGACTTTGAGAA	LEAFLTQKQQEGELKDDDFE	2	29	34		0.722145	25.482	12.3215		0.0283395
CTTGAGGCCTTTCTTACCCAGAGATAGAAGGAGGGAGAACTAAAGGATGACGACTTTGAGAA	LEAFLTQR*KEGELKDDDFE	284	29	29		102.545	25.482	10.5095		4.0242
CTTGAGGCCTTTCTTACCCAGAAGCAGAAAATGGGAGAACTGAAGGATGACGACTTTGAGAA	LEAFLTQKQKMGELKDDDFE	0	29	2		0	25.482	0.724795		0
CTTGAGGCCTTTCTTACCCAGAAGCAGGTAACTGAAGGATGACGACTTTGAGAAGATCAGTG	LEAFLTQKQVTEG*RL*EDQ	691	29	0		249.501	25.482	0		9.79129
CTTGAGGCCTTTCTTACCCAGAAGCAGAGGCGGGAGAACTGAAGGATGACGACTTTGAGAAG	LEAFLTQKQRREN*RMTTLR	688	29	0		248.418	25.482	0		9.74878
CTTGAGGCCTTTCTTACCCAGAAGCAGAAAGCAGGTGGGAGAACTGAAGGATGACGACTTTG	LEAFLTQKQKAGGRTEG*RL	591	29	0		213.394	25.482	0		8.37431
CTTGAGGCCTTTCTTACCCAGAACTGAAGGATGACGACTTTGAGAAGATCAGTGAGAGACGG	LEAFLTQN*RMTTLRRSVRD	510	29	0		184.147	25.482	0		7.22656
CTTGAGGCCTTTCTTACCCGGAACTGAAGGATGACGACTTTGAGAAGATCAGTGAGAGATCG	LEAFLTRN*RMTTLRRSVRD	264	29	0		95.3232	25.482	0		3.74081
CTTGAGGCCTTTCTTACCCAGAAGCAGGTGGGAGAACTGAAGGATGACGATTTGAGAAGATC	LEAFLTQKQVGELKDDDLRR	213	29	0		76.9085	25.482	0		3.01815
CTTGAGGCCTTTCTTACCCAGAAGTAGAGGTGGGAGAACTGAAGGATGACGACTTTGAGAAG	LEAFLTQK*RWEN*RMTTLR	160	29	0		57.7716	25.482	0		2.26716
CTTGAGGCCTTCCTTACCCAGGTGGGAGAACTGAAGGATGACGACTTTGAGAAGATCAGTGA	LEAFLTQVGELKDDDFEKIS	116	29	0		41.8844	25.482	0		1.64369
CTTGAGGCCTTTCTTACCTAGAAGCAGAGGTGGGAGAACTGAAGGATGACGACTTTGAGAAG	LEAFLT*KQRWEN*RMTTLR	109	29	0		39.3569	25.482	0		1.5445
CTTGAGGCCTTTCTTACCCAGAAGCAGAGAACTGAAGGCTGACGACTTTGAGAAGATCAGTG	LEAFLTQKQRTEG*RL*EDQ	106	29	0		38.2737	25.482	0		1.50199
CTTGAGGCCTTTCTTACCCAGAAGAGGATGACGACTTTGAGAAGATCAGTGAGAGATCGGAA	LEAFLTQKRMTTLRRSVRDR	82	29	0		29.608	25.482	0		1.16192
CTTGAGGCCTTTCTTACCCAGAAGCAGAAAGGTGGGAGAACTGAAGGATGACGACGTTGAGA	LEAFLTQKQKGGRTEG*RR*	77	29	0		27.8026	25.482	0		1.09107
CTTGAGGCCTTTCTTACCCAGAAGCAGAGAACTGAAGGGTGACGACTTTGAGAAGATCAGTG	LEAFLTQKQRTEG*RL*EDQ	75	29	0		27.0804	25.482	0		1.06273
CTTGAGGCCTTTCTTACCCAGAAGCAGACAGGGGGGAGAACTGAAGGATGACGACTTTGAGA	LEAFLTQKQTGGRTEG*RL*	56	29	0		20.2201	25.482	0		0.793505
CTTGAGGCCTTTCTTACCCAGAAGCAGAGGGATGACGACTTTGAGAAGATCAGTGAGAGATC	LEAFLTQKQRDDDFEKISER	53	29	0		19.1368	25.482	0		0.750996
CTTGAGGCCTTTCTTACCCAGAAGCAGAAGATGACGACTTTGAGAAGATCAAAGTCAAAGAT	LEAFLTQKQKMTTLRRSKSK	33	29	0		11.9154	25.482	0		0.467601
TTTGAGGCCTTTCTTACCCAGAAGGTGGGAGAACTGAAGGATGACGACTTTGAGAAGATCAG	FEAFLTQKVGELKDDDFEKI	26	29	0		9.38789	25.482	0		0.368413
CTTGAGGTGGGAGAACTGAAGGATGACGACTTTGAAAGATCAGTGAGAGATCGGAAGAGCAC	LEVGELKDDDFERSVRDRKS	21	29	0		7.58252	25.482	0		0.297564
CTTGAGGCCTTTCTTACCCAGAAGCAGGAGGGCGAACTGAAGGATGACGACTTTGAGAAGAT	LEAFLTQKQEGELKDDDFEK	18	29	0		6.49931	25.482	0		0.255055
CTTGAGGCCTTTCTTACCCAGAAGGATGACGAATTTGAGAAGATCAGTGAGAGATCGGAAGA	LEAFLTQKDDEFEKISERSE	16	29	0		5.77716	25.482	0		0.226716
CTTGAGGCCTTTCTTTCTGAAGGATGACGACTTTGAGAAGATCAGTGAGAGATCGGAAGAGC	LEAFLSEG*RL*EDQ*EIGR	12	29	0		4.33287	25.482	0		0.170037
CTTGAGGCCTTTCTTACCCAGAAGGTGGGAGAACTGAAGGATGACGACTTTGCGAAGATCAG	LEAFLTQKVGELKDDDFAKI	11	29	0		3.9718	25.482	0		0.155867
CTTGAGGCCTTTCTTACCCAGAAGCAGTGGGTGAACTGAAGGATGACGACTTTGAGAAGATC	LEAFLTQKQWVN*RMTTLRR	2	29	0		0.722145	25.482	0		0.0283395
CTTGAGGCCTTTCTTACCCAGAAGAGAGAAGTGGGAGAACTGAAGGATGACGACTTTGAGAA	LEAFLTQKREVGELKDDDFE	2	29	0		0.722145	25.482	0		0.0283395
CTTGAGGCCTTTCTTACCCAGAAGCTTGACTGAAGGATGACGACTTTGAGAAGATCAGTGAG	LEAFLTQKLD*RMTTLRRSV	1	29	0		0.361073	25.482	0		0.0141697
CTTGAGGCCTTTCTTACCCAGAAGCAGAAGGATGAACTGAAGGATGACGACTTTGAGAAGAT	LEAFLTQKQKDELKDDDFEK	1	29	0		0.361073	25.482	0		0.0141697
CTTGAGGCCTTTCTTACCCAGAAGCAACAGGTGGGAGAACTGAAGGATGACGACTTTGAGAA	LEAFLTQKQQVGELKDDDFE	1	29	0		0.361073	25.482	0		0.0141697
CTTGAGCACTGAAGGATGACGACTTTGAGAAGATCAGTGAGAGATCGGAAGAGCACACGTCT	LEH*RMTTLRRSVRDRKSTR	1	29	0		0.361073	25.482	0		0.0141697
CTTGATGACGCTTTGAGAATGACGACTTTGAGAAGATCAGTGAGAGATCGGAAGAGCACACG	LDDALRMTTLRRSVRDRKST	0	29	0		0	25.482	0		0
CTTGAGGCCTTTCTTACCCAGACTTTGAGAAGACGACTTTGAGAAGATCAGTGAGAGATCGG	LEAFLTQTLRRRL*EDQ*EI	0	29	0		0	25.482	0		0
CTTGAGGCCTTTCTTACCCAGAAGTGGGAGAACTGAACTGAAGGATGACGACTTTGAGAAGA	LEAFLTQKWEN*TEG*RL*E	0	29	0		0	25.482	0		0
CTTGAGGCCTTTCTTACCCAGAAGCATGAGAACTGAAGGATGACGACTTTGAGAAGATCAGT	LEAFLTQKHEN*RMTTLRRS	0	29	0		0	25.482	0		0
CTTGAGGCCTTTCTTACCCAGAAGCAGTAAGGGGAAAAAACTGAAGGATGACGACTTTGAGA	LEAFLTQKQ*GEKTEG*RL*	0	29	0		0	25.482	0		0
CTTGAGGCCTTTCTTACCCAGAAGCAGAGAACTGAAGAACTGAAGGATGACGACTTTGAGAA	LEAFLTQKQRTEELKDDDFE	0	29	0		0	25.482	0		0
CTTGAGGCCTTTCTTACCCAGAAGCAGACTGAACTGAAGGATGGGAGAACTGAAGGATGACG	LEAFLTQKQTELKDGRTEG*	0	29	0		0	25.482	0		0
CTTGAGGCCTTTCTTACCCAGAAGCAGAATGACTTACCCAGAAGCAGAATGAACTGAAGGAT	LEAFLTQKQNDLPRSRMN*R	0	29	0		0	25.482	0		0
CTTGAGGCCTTTCTTACCCAGAAGCAGAAGAAACAGAAGGTGGGAGAACTGAAGGATGACGA	LEAFLTQKQKKQKVGELKDD	0	29	0		0	25.482	0		0
CTTGAGGCCTTTCTTACCCAGAAGCAGAACTTCTGCTTCTGGGTAAGAAAGCAACTTCAGGT	LEAFLTQKQNFCFWVRKQLQ	0	29	0		0	25.482	0		0
CTTGAGGCCTTTCTTACCCAGAAGCAGAACTGAAGAAGGTGGGAGAACTGAAGGATGACGAC	LEAFLTQKQN*RRWEN*RMT	0	29	0		0	25.482	0		0
CTTGAGGCCTTTCTTACCCACCTGAAGGATGACGACTTTGAGAAGATCAGTGAGAGATCGGA	LEAFLTHLKDDDFEKISERS	0	29	0		0	25.482	0		0
CTTGAGGCCTTTCTTAAGGCTCCAGGTGGGAGAACTGAAGGATGACGACTTTGAGAAGATCA	LEAFLKAPGGRTEG*RL*ED	0	29	0		0	25.482	0		0
CTTGAGGCCACTGAAGGATGACGACTTTGAGAAGATCAGTGAGAGATCGGAAGAGCACACGT	LEATEG*RL*EDQ*EIGRAH	0	29	0		0	25.482	0		0
CTTGAGGCACCAGAACTGAAGGATGACGACTTTGAGAAGATCAGTGAGAGATCGGAAGAGCA	LEAPELKDDDFEKISERSEE	0	29	0		0	25.482	0		0
CTTGAGGACAACTGAAGGATGACGACTTTGAGAAGATCAGTGAGAGATCGGAAGAGCACACG	LEDN*RMTTLRRSVRDRKST	0	29	0		0	25.482	0		0
CTTGAGGCCTTTCTTACCCATAAGCAGAAGGTGGGAGAACTGAAGGATGACGACTTTGAGAA	LEAFLTHKQKVGELKDDDFE	8	28	234		2.88858	24.6033	84.801		0.117406
CTTGAGGCCTGTCTTACCCAGAAGCAGAAGGTGGGAGAACTGAAGGATGACGACTTTGAGAA	LEACLTQKQKVGELKDDDFE	7	28	138		2.52751	24.6033	50.0109		0.102731
CTTGAGGCCTTTCTTACCCAGAAGCAGAAGGTGGGAGAACTGAGGATGACGACTTTGAGAAG	LEAFLTQKQKVGELRMTTLR	2	28	70		0.722145	24.6033	25.3678		0.0293516
CTTGTGGCCTTTCTTACCCAGAAGCAGAAGGAGGGAGAACTGAAGGATGACGACTTTGAGAA	LVAFLTQKQKEGELKDDDFE	1	28	10		0.361073	24.6033	3.62397		0.0146758
CTTGAGGCCTTTCTTACCCAGAACTGGAGGATGACGACTTTGAGAAGATCAGTGAGAGATCG	LEAFLTQNWRMTTLRRSVRD	908	28	0		327.854	24.6033	0		13.3256
CTTGAGGCCTTTCTTACCCAGAACTGAAGGATGACGACTTTGAGAAGACAGTGAGAGATCGG	LEAFLTQN*RMTTLRRQ*EI	448	28	0		161.761	24.6033	0		6.57476
CTTGAGGCCTTTCTTACCCAGAACTGAAGGGTGACGACTTTGAGAAGATCAGTGAGAGATCG	LEAFLTQN*RVTTLRRSVRD	366	28	0		132.153	24.6033	0		5.37134
CTTGAGGCCTTTCTTACCCAGAAGCTGGTGGGAGAACTGAAGGATGACGACTTTGAGAAGAT	LEAFLTQKLVGELKDDDFEK	291	28	0		105.072	24.6033	0		4.27066
CTTGAGGCCTTTCTTACCCAGAAGCAGAAAGGTGGGAGAACTGAAGGATGACGATTTGAGAA	LEAFLTQKQKGGRTEG*RFE	231	28	0		83.4078	24.6033	0		3.39011
CTTGAGGTGGGAGAACTGCAGGATGACGACTTTGAGAAGATCAGTGAGAGATCGGAAGAGCA	LEVGELQDDDFEKISERSEE	214	28	0		77.2695	24.6033	0		3.14062
CTTGAGGCCTTTCTTACCCAGAAGCAGAGGTGAGAGAACTGAAGGATGACGACTTTGAGAAG	LEAFLTQKQR*EN*RMTTLR	111	28	0		40.0791	24.6033	0		1.62901
CTTGAGGCCTTTCTTACCCAGAAGCAGGTGGGAGAACTGAAGGATGACGGCTTTGAGAAGAT	LEAFLTQKQVGELKDDGFEK	108	28	0		38.9958	24.6033	0		1.58499
CTTGAGGCCTTTCTTACCCAGAAGCAGAGAACTGAAGGATGACGACTTGAGAAGATCAGTGA	LEAFLTQKQRTEG*RLEKIS	106	28	0		38.2737	24.6033	0		1.55563
CTTGAGGCCTTTCTTACCCAGAAGCAGAGGTGGGAGAACTGCAGGATGACGACTTTGAGAAG	LEAFLTQKQRWENCRMTTLR	87	28	0		31.4133	24.6033	0		1.27679
CTTGAGGCCTTTCTTACCCAGAAGGTGGGAGAACTGAAGGATGACGACTTTGAGAAGTCAGT	LEAFLTQKVGELKDDDFEKS	79	28	0		28.5247	24.6033	0		1.15939
CTTGAGGCCTTTCTTACTCAGGTGGGAGAACTGAAGGATGACGACTTTGAGAAGATCAGTGA	LEAFLTQVGELKDDDFEKIS	75	28	0		27.0804	24.6033	0		1.10068
CTTGAGGCCTTTCTTACCCAGAACCAGAAAGGTGGGAGAACTGAAGGATGACGACTTTGAGA	LEAFLTQNQKGGRTEG*RL*	70	28	0		25.2751	24.6033	0		1.02731
CTTGAGGCATTTCTTACCCAGAAGCAGGTGGGAGAACTGAAGGATGACGACTTTGAGAAGAT	LEAFLTQKQVGELKDDDFEK	65	28	0		23.4697	24.6033	0		0.953927
CTTGAGGCCTTTCTTACCCAGAAGGTGGAGAACTGAAGGATGACGACTTTGAGAAGATCAGT	LEAFLTQKVEN*RMTTLRRS	63	28	0		22.7476	24.6033	0		0.924575
CTTGAGGCCTTTCTTACGGTGGGAGAACTGAAGGATGACGACTTTGAGAAGATCAGTGAGAG	LEAFLTVGELKDDDFEKISE	30	28	0		10.8322	24.6033	0		0.440274
CTTGAGGCCTTTCTTACCCAGAAGGTGGAAGAACTGAAGGATGACGACTTTGAGAAGATCAG	LEAFLTQKVEELKDDDFEKI	26	28	0		9.38789	24.6033	0		0.381571
CTTGAGGCCTTTCTTACCCAGAAGCAGAACTTCTGGGTGGGAGAACTGAAGGATGACGACTT	LEAFLTQKQNFWVGELKDDD	23	28	0		8.30467	24.6033	0		0.337543
CTTGAGGCCTTTCTTACCCAGAACTCTATGGGAGAACTGAAGGATGACGACTTTGAGAAGAT	LEAFLTQNSMGELKDDDFEK	12	28	0		4.33287	24.6033	0		0.17611
CTTGAGGCCTTTCTTACCCAGAAGCAGAGAACTGAAGATGGGAGAACTGAAGGATGACGACT	LEAFLTQKQRTEDGRTEG*R	11	28	0		3.9718	24.6033	0		0.161434
CTTGAGGCCTTTCTTACCCAGAAGGATGACGACTTTGAGAAGATCAGTGAAGATCGGAAGAG	LEAFLTQKDDDFEKISEDRK	6	28	0		2.16644	24.6033	0		0.0880548
CTTGAGGCCTTTCTTACCCAGAAGCAGACCAGGTGGGAGAACTGAAGGATGACGACTTTGAG	LEAFLTQKQTRWEN*RMTTL	6	28	0		2.16644	24.6033	0		0.0880548
CTTGAGGCCTTTCTTACCCAGAAGCAGGAAGGATGACGACTTTGAGAAGATCAGTGAGAGAT	LEAFLTQKQEG*RL*EDQ*E	1	28	0		0.361073	24.6033	0		0.0146758
CTTGAGGCCTTTCTTACCCAGAAGCAGAAGAAGTGGGAGAACTGAAGGATGACGACTTTGAG	LEAFLTQKQKKWEN*RMTTL	1	28	0		0.361073	24.6033	0		0.0146758
CTTGAGGCCTTTCTTACCCAGAACTGAAGGATGGGAGAACTGAAGGATGACGACTTTGAGAA	LEAFLTQN*RMGELKDDDFE	1	28	0		0.361073	24.6033	0		0.0146758
CTTGAGGCCTTTCCCACCCAGGTGGGAGAACTGAAGGATGACGACTTTGAGAAGATCAGTGA	LEAFPTQVGELKDDDFEKIS	1	28	0		0.361073	24.6033	0		0.0146758
CTTGAGGCCTTTCTTACCCAGAAGCTTCTGTTCCAAAGTGGGGAGAACTGAAGGATGACGAC	LEAFLTQKLLFQSGEN*RMT	0	28	0		0	24.6033	0		0
CTTGAGGCCTTTCTTACCCAGAAGCTTCTGGTGGGTAAGTTCTCCAGGTGGGAGAACTGAAG	LEAFLTQKLLVGKFSRWEN*	0	28	0		0	24.6033	0		0
CTTGAGGCCTTTCTTACCCAGAAGCTGCTTCTGTGGGAGAACTGAAGGATGACGACTTTGAG	LEAFLTQKLLLWEN*RMTTL	0	28	0		0	24.6033	0		0
CTTGAGGCCTTTCTTACCCAGAAGCATTCAGTTCTCCCAGGTGGGAGAACTGAAGGATGACG	LEAFLTQKHSVLPGGRTEG*	0	28	0		0	24.6033	0		0
CTTGAGGCCTTTCTTACCCAGAAGCATGACTGAACTGAAGGATGACGACTTTGAGAAGATCA	LEAFLTQKHD*TEG*RL*ED	0	28	0		0	24.6033	0		0
CTTGAGGCCTTTCTTACCCAGAAGCAGTGAAGAACTGAAGGATGACGACTTTGAGAAGATCA	LEAFLTQKQ*RTEG*RL*ED	0	28	0		0	24.6033	0		0
CTTGAGGCCTTTCTTACCCAGAAGCAGGTAAGAAGAAGGTGGGAGAACTGAAGGATGACGAC	LEAFLTQKQVRRRWEN*RMT	0	28	0		0	24.6033	0		0
CTTGAGGCCTTTCTTACCCAGAAGCAGGAGGCCTTTCTTACCCAGAAGGTGGGAGAACTGAA	LEAFLTQKQEAFLTQKVGEL	0	28	0		0	24.6033	0		0
CTTGAGGCCTTTCTTACCCAGAAGCAGATGGTTCAGGTGGGAGAACTGAAGGATGACGACTT	LEAFLTQKQMVQVGELKDDD	0	28	0		0	24.6033	0		0
CTTGAGGCCTTTCTTACCCAGAAGCAGAGAACTGGGCGAACTGAAGGATGACGACTTTGAGA	LEAFLTQKQRTGRTEG*RL*	0	28	0		0	24.6033	0		0
CTTGAGGCCTTTCTTACCCAGAAGCAGACAGAAGCAGAAGGAGAACTGAAGGATGACGACTT	LEAFLTQKQTEAEGELKDDD	0	28	0		0	24.6033	0		0
CTTGAGGCCTTTCTTACCCAGAAGCAGAAGGATAACTGAAGGATGACGACTTTGAGAAGATC	LEAFLTQKQKDN*RMTTLRR	0	28	0		0	24.6033	0		0
CTTGAGGCCTTTCTTACCCAGAAGCAGAACTGAAGGATGAACGACTTTGAGAAGATCTTTGG	LEAFLTQKQN*RMNDFEKIF	0	28	0		0	24.6033	0		0
CTTGAGGCCTTTCTTACCCAGAAGCAGAACTGAACTGAACTGAACAGAAGGAGAACTGAAGG	LEAFLTQKQN*TELNRRRTE	0	28	0		0	24.6033	0		0
CTTGAGGCCTTTCTTACCCAGAAGCAGAAAATTAAGGTGGGAGAACTGAAGGATGACGACTT	LEAFLTQKQKIKVGELKDDD	0	28	0		0	24.6033	0		0
CTTGAGGCCTTTCTTACCCAGAAGCACTGGGTTACCCAGGTGGGAGAACTGAAGGATGACGA	LEAFLTQKHWVTQVGELKDD	0	28	0		0	24.6033	0		0
CTTGAGGCCTTTCTTACCCAGAAGCAAGGCCTCTCAGAAGTGGGAGAACTGAAGGATGACGA	LEAFLTQKQGLSEVGELKDD	0	28	0		0	24.6033	0		0
CTTGAGGCCTTTCTTACCCAGAAAGGTAAGAACTGAAGGATGACGACTTTGAGAAGATCAGT	LEAFLTQKGKN*RMTTLRRS	0	28	0		0	24.6033	0		0
CTTGAGGCCTTTCTAGCAGGTGGGAGAACTGAAGGATGACGACTTTGAGAAGATCAGTGAGA	LEAFLAGGRTEG*RL*EDQ*	0	28	0		0	24.6033	0		0
CTTGAGGCCTTTCAGTTCAGGTGGGAGAACTGAAGGATGACGACTTTGAGAAGATCAGTGAG	LEAFQFRWEN*RMTTLRRSV	0	28	0		0	24.6033	0		0
CTTGAGGCCTGTGGGAGAACTGAAGGATGACGACTTTGAGAAGATCAGTGAGAGATCGGAAG	LEACGRTEG*RL*EDQ*EIG	0	28	0		0	24.6033	0		0
CTTGAGGCAGAAGCAGAACAGGTGGGAGAACTGAAGGATGACGACTTTGAGAAGATCAGTGA	LEAEAEQVGELKDDDFEKIS	0	28	0		0	24.6033	0		0
CTTGAGGCCTTTCTTACCAAGAAGCAGAAGGAGGGAGAACTGAAGGATGACGACTTTGAGAA	LEAFLTKKQKEGELKDDDFE	0	27	28		0	23.7246	10.1471		0
CTTGAGGCCTTTCTTACCCAGAACTGAAGGATGACGACTTTGAGAAGATCATGAGAGATCGG	LEAFLTQN*RMTTLRRS*EI	520	27	0		187.758	23.7246	0		7.91406
CTTGAGGCCTTTCTTACCCAGAGCTGAAGGATGACGACTTTGAGAAGATCAGTGAGAGATCG	LEAFLTQS*RMTTLRRSVRD	353	27	0		127.459	23.7246	0		5.37243
CTTGAGGCCTTTCTTACCCAGAAGCAGGTGGGAGAACTGAAGGAAGACGACTTTGAGAAGAT	LEAFLTQKQVGELKEDDFEK	126	27	0		45.4951	23.7246	0		1.91764
CTTGAGGCCTTTCTTACCCAGGTGGGAGAACTGAAGGATGACGACTTTGAGAAGATCAGTGG	LEAFLTQVGELKDDDFEKIS	106	27	0		38.2737	23.7246	0		1.61325
CTTGAGGCCTTTCTTACCCAGAAGCAGAAAGGTGGGAGAACTGAAGGATGACGACTTTGCGA	LEAFLTQKQKGGRTEG*RLC	87	27	0		31.4133	23.7246	0		1.32408
CTTGAGGCCTTTCTTACTCAGAAGGTGGGAGAACTGAAGGATGACGACTTTGAGAAGATCAG	LEAFLTQKVGELKDDDFEKI	73	27	0		26.3583	23.7246	0		1.11101
CTTGAGGCCTTTCTTACCCATCCTTCAGTGGGAGAACTGAAGGATGACGACTTTGAGAAGAT	LEAFLTHPSVGELKDDDFEK	61	27	0		22.0254	23.7246	0		0.92838
CTTGAGGCCTTTCTTACCCAGAAGGTGGGAGAACTGAAGGATGACGACTTTGAGAAGAACAG	LEAFLTQKVGELKDDDFEKN	50	27	0		18.0536	23.7246	0		0.760967
CTTGAGGCCTTTCTTACCCAGAAGCAGAACTGAAGGATGACGATTTTGAGAAGATCAGTGAG	LEAFLTQKQN*RMTILRRSV	37	27	0		13.3597	23.7246	0		0.563116
CTTGAGGCCTTTCTTACCCAGAAGCAGAACTGAAGGATGACGACTTTGAGAAGATCAGTGGA	LEAFLTQKQN*RMTTLRRSV	30	27	0		10.8322	23.7246	0		0.45658
CTTGAGGCCTTTCTTACCCAGAAGCAGGAGGATGACGACTTTGAGAAGATCAGTGAGAGATC	LEAFLTQKQEDDDFEKISER	29	27	0		10.4711	23.7246	0		0.441361
CTTGAGCCCTTTCTTACCCAGAAGCAGAAAGGTGGGAGAACTGAAGGATGACGACTTTGAGA	LEPFLTQKQKGGRTEG*RL*	28	27	0		10.11	23.7246	0		0.426142
CTTGAGGCCTTTCTTACCCAGAAGCAGACAGGCGGGAGAACTGAAGGATGACGACTTTGAGA	LEAFLTQKQTGGRTEG*RL*	20	27	0		7.22145	23.7246	0		0.304387
CTTGAGGCCTTGCAGGATGACGACTTTGAGAAGATCAGTGAGAGATCGGAAGAGCACACGTC	LEALQDDDFEKISERSEEHT	13	27	0		4.69394	23.7246	0		0.197851
CTTGAGGCCTTTCTTACCCAGAAGCAGAGAACTGAAGGAGAACTGAAGGATGACGACTTTGA	LEAFLTQKQRTEGELKDDDF	12	27	0		4.33287	23.7246	0		0.182632
CTTGAGGCCTTTCTTACCCAGAACTGAACTGAAGGATGACGACTTTGAGAAGATCAGTGAGA	LEAFLTQN*TEG*RL*EDQ*	12	27	0		4.33287	23.7246	0		0.182632
CTTGAGGCCTTTCTTACCCAGAAGCAGAAAGGTGGGAGAACTGAAGCAGGTTCTGGGTAAGG	LEAFLTQKQKGGRTEAGSG*	10	27	0		3.61073	23.7246	0		0.152193
CTTGAGGCCGACTTTGAGAAGATCAGTGAGAGATCGGAAGAGCACACGTCTGAACTCCAGTC	LEADFEKISERSEEHTSELQ	4	27	0		1.44429	23.7246	0		0.0608774
CTTGAGGCCTTTCTTTGAAGGATGACGACTTTGAGAAGATCAGTGAGAGATCGGAAGAGCAC	LEAFL*RMTTLRRSVRDRKS	0	27	0		0	23.7246	0		0
CTTGAGGCCTTTCTTCCCCAGAAGCAGGTGGGAGAACTGAAGGATGACGCCTTTGAGAAGAT	LEAFLPQKQVGELKDDAFEK	0	27	0		0	23.7246	0		0
CTTGAGGCCTTTCTTACCTCAAGAAGAAAGAAGAACTGAAGGATGACGACTTTGAGAAGATC	LEAFLTSRRKKN*RMTTLRR	0	27	0		0	23.7246	0		0
CTTGAGGCCTTTCTTACCCAGAAGTAAGTAAGGTGGGAGAACTGAAGGATGACGACTTTGAG	LEAFLTQK*VRWEN*RMTTL	0	27	0		0	23.7246	0		0
CTTGAGGCCTTTCTTACCCAGAAGGCTTGTGGGAGAACTGAAGGATGACGACTTTGAGAAGA	LEAFLTQKACGRTEG*RL*E	0	27	0		0	23.7246	0		0
CTTGAGGCCTTTCTTACCCAGAAGCTTTGAGAAGATCAGACTTTGAGAAGATCAGTGAGAGA	LEAFLTQKL*EDQTLRRSVR	0	27	0		0	23.7246	0		0
CTTGAGGCCTTTCTTACCCAGAAGCTTCTTGAGGTGGGAGAACTGAAGGATGACGACTTTGA	LEAFLTQKLLEVGELKDDDF	0	27	0		0	23.7246	0		0
CTTGAGGCCTTTCTTACCCAGAAGCTTCTATATATGGGAGAACTGAAGGATGACGACTTTGA	LEAFLTQKLLYMGELKDDDF	0	27	0		0	23.7246	0		0
CTTGAGGCCTTTCTTACCCAGAAGCAGTAAGAAAGAGAACTGAAGGATGACGACTTTGAGAA	LEAFLTQKQ*ERELKDDDFE	0	27	0		0	23.7246	0		0
CTTGAGGCCTTTCTTACCCAGAAGCAGGTGGGAGAACTGAAGGAACTGAAGGATGACGACTT	LEAFLTQKQVGELKELKDDD	0	27	0		0	23.7246	0		0
CTTGAGGCCTTTCTTACCCAGAAGCAGATGACGTCACTGAAGGATGACGACTTTGAGAAGAT	LEAFLTQKQMTSLKDDDFEK	0	27	0		0	23.7246	0		0
CTTGAGGCCTTTCTTACCCAGAAGCAGACTTAAAGGTATGTTTTAAATTATAATGAAACTTC	LEAFLTQKQT*RYVLNYNET	0	27	0		0	23.7246	0		0
CTTGAGGCCTTTCTTACCCAGAAGCAGAAGCAGAAGGATGACGACTTTGAGAAGATCAGTGA	LEAFLTQKQKQKDDDFEKIS	0	27	0		0	23.7246	0		0
CTTGAGGCCTTTCTTACCCAGAAGCAGAACTTCTTCTGGGAGGATGACGACTTTGAGAAGAT	LEAFLTQKQNFFWEDDDFEK	0	27	0		0	23.7246	0		0
CTTGAGGCCTTTCTTACCCAGAAGCAGAACTTACTGAAGGATGACGACTTTGAGAAGATCAG	LEAFLTQKQNLLKDDDFEKI	0	27	0		0	23.7246	0		0
CTTGAGGCCTTTCTTACCCAGAAGCAGAACTGAGGTAAGAACTGGGAGAACTGAAGGATGAC	LEAFLTQKQN*GKNWEN*RM	0	27	0		0	23.7246	0		0
CTTGAGGCCTTTCTTACCCAGAAGCAGAACTGAAGGATGAACTGAACTGAATGAACAGAACT	LEAFLTQKQN*RMN*TE*TE	0	27	0		0	23.7246	0		0
CTTGAGGCCTTTCTTACCCAGAAGCAGAACTGAAGATCTTACCCAGATGGGAGAACTGAAGG	LEAFLTQKQN*RSYPDGRTE	0	27	0		0	23.7246	0		0
CTTGAGGCCTTTCTTACCCAGAAGCAGAACTGAACTGAACTGAACTGAACTGAAGGATGACG	LEAFLTQKQN*TELN*TEG*	0	27	0		0	23.7246	0		0
CTTGAGGCCTTTCTTACCCAGAAGCAGAACCAGTGGGAGAACTGAAGGATGACGACTTTGAG	LEAFLTQKQNQWEN*RMTTL	0	27	0		0	23.7246	0		0
CTTGAGGCCTTTCTTACCCAGAAGAACTGAAGGATGACGTTCTTCGATGACGACTTTGAGAA	LEAFLTQKN*RMTFFDDDFE	0	27	0		0	23.7246	0		0
CTTGAGGCCTTTCTTACCCAGAACTGCTGAAGGATGACGACTTTGAGAAGATCAGTGAGAGA	LEAFLTQNC*RMTTLRRSVR	0	27	0		0	23.7246	0		0
CTTGAGGCCTTTCTTACCCACTCCAGAGAACGCAACCAGAAAGGGAGCTTCAAGTCTGTAAC	LEAFLTHSRERNQKGSFKSV	0	27	0		0	23.7246	0		0
CTTGAGGCCTTTCTTACCAAGAAGGATGACGACTTTGAGAAGATCAGTGAGAGATCGGAAGA	LEAFLTKKDDDFEKISERSE	0	27	0		0	23.7246	0		0
CTTGAGGCCTTTCTCTGGGTAAGAACTGTGGGAGAACTGAAGGATGACGACTTTGAGAAGAT	LEAFLWVRTVGELKDDDFEK	0	27	0		0	23.7246	0		0
CTTGAGGCCTTTCCAGAACTGAAGAACTGAAGGATGACGACTTTGAGAAGATCAGTGAGAGA	LEAFPELKN*RMTTLRRSVR	0	27	0		0	23.7246	0		0
CTTGAGGCCTTTAAACTGAAGGATGACGACTTTGAGAAGATCAGTGAGAGATCGGAAGAGCA	LEAFKLKDDDFEKISERSEE	0	27	0		0	23.7246	0		0
CTTGAGGCCTTGAGCCTTGAGGTGGGAGAACTGAAGGATGACGACTTTGAGAAGATCAGTGA	LEALSLEVGELKDDDFEKIS	0	27	0		0	23.7246	0		0
CTTGAGGCCTTCTTTCTTACCCAGAAGCAGTAAGGTGGGAGAACTGAAGGATGACGACTTTG	LEAFFLTQKQ*GGRTEG*RL	0	27	0		0	23.7246	0		0
CTGCTGAAGGATGACGACTTTGAGAAGATCAGTGAGAGATCGGAAGAGCACACGTCTGAACT	LLKDDDFEKISERSEEHTSE	0	27	0		0	23.7246	0		0
CTCGACTTTGAGAAGATCAGTGAGAGATCGGAAGAGCACACGTCTGAACTCCAGTCACCTAA	LDFEKISERSEEHTSELQSP	0	27	0		0	23.7246	0		0
CGTGAGGCCTTTCTTACCCAGAAGCAGAAGGTGGGAGAACTGAAGGATGACGACTTTGAGAA	REAFLTQKQKVGELKDDDFE	6	26	362		2.16644	22.8459	131.188		0.0948282
CTTGAGGCCTTTCTTACCCAGAAATAGAAGGTGGGAGAACTGAAGGATGACGACTTTGAGAA	LEAFLTQK*KVGELKDDDFE	10	26	118		3.61073	22.8459	42.7629		0.158047
CTTGAGGCCTTTCTTACCCAGAAGCAGAAGGAGGGAGAACTGAAGGATGACGAATTTGAGAA	LEAFLTQKQKEGELKDDEFE	5	26	22		1.80536	22.8459	7.97274		0.0790235
CTTGAGGCCTTTCTTACCCAGAAGCAGGAGGAGGGAGAACTGAAGGATGACGACTTTGAGAA	LEAFLTQKQEEGELKDDDFE	3	26	9		1.08322	22.8459	3.26158		0.0474141
CTTGAGGCCCAGAAGCAGTTCAGGTGGGAGAACTGAAGGATGACGACTTTGAGAAGATCAGT	LEAQKQFRWEN*RMTTLRRS	416	26	0		150.206	22.8459	0		6.57476
CTTGAGGCCTTTCTTACCCAGGTGGGAGAACTGAAGGATGACGAATTTGAGAAGATCAGTGA	LEAFLTQVGELKDDEFEKIS	256	26	0		92.4346	22.8459	0		4.046
CTTGAGGCCTTTCTTACCCAGGTGGGAGAACTGAAGGATGACGACTTTGAGAAGACAGTGAG	LEAFLTQVGELKDDDFEKTV	192	26	0		69.3259	22.8459	0		3.0345
CTTGAGGCCTTTCTTACCCAGAAGCAGAAAGGTGGGAGTACTGAAGGATGACGACTTTGAGA	LEAFLTQKQKGGSTEG*RL*	165	26	0		59.577	22.8459	0		2.60778
CTTGAGGCCTTTCTTACCCTGAACTGAAGGATGACGACTTTGAGAAGATCAGTGAGAGATCG	LEAFLTLN*RMTTLRRSVRD	114	26	0		41.1623	22.8459	0		1.80174
CTTGAGGCCTTTCTTACCCAGAAGCAGAGGTAGGAGAACTGAAGGATGACGACTTTGAGAAG	LEAFLTQKQR*EN*RMTTLR	101	26	0		36.4683	22.8459	0		1.59628
CTTGAGGCCTTTCTTACCCAGAAGCAGAGGTGGGAGAACTGAAGGATGACGACTTTAAGAAG	LEAFLTQKQRWEN*RMTTLR	100	26	0		36.1073	22.8459	0		1.58047
CTTGAGGCCTTTCTTACCCAGAAGCAGGTGGGAGAACTGAAGGATGACGACTATGAGAAGAT	LEAFLTQKQVGELKDDDYEK	94	26	0		33.9408	22.8459	0		1.48564
CTTGAGGCCATTCTTACCCAGAAGCAGGTGGGAGAACTGAAGGATGACGACTTTGAGAAGAT	LEAILTQKQVGELKDDDFEK	91	26	0		32.8576	22.8459	0		1.43823
CTTGGGGCCTTTCTTACCCAGAAGCAGAGAACTGAAGGATGACGACTTTGAGAAGATCAGTG	LGAFLTQKQRTEG*RL*EDQ	87	26	0		31.4133	22.8459	0		1.37501
CTTGAGGCCTTTCTTACCCAGAAGGTGGGAGAACTGAAGGATGACGACTTTGAAAAGATCAG	LEAFLTQKVGELKDDDFEKI	64	26	0		23.1086	22.8459	0		1.0115
CTTGAGGCCTTTCTTACCCAGAAGGTGGGAGAACTGAAGGATGACGACTTTGAGAAAATCAG	LEAFLTQKVGELKDDDFEKI	63	26	0		22.7476	22.8459	0		0.995696
CTTGAGGCATTTCTTACCCAGAAGCAGAAAGGTGGGAGAACTGAAGGATGACGACTTTGAGA	LEAFLTQKQKGGRTEG*RL*	59	26	0		21.3033	22.8459	0		0.932478
CTTGAGGCCTTTCTTACCAAGAACTGAAGGATGACGACTTTGAGAAGATCAGTGAGAGATCG	LEAFLTKN*RMTTLRRSVRD	49	26	0		17.6926	22.8459	0		0.77443
CTTGAGGCCTTTCTTACCCAGAAGGTGGGAGAACAGAAGGATGACGACTTTGAGAAGATCAG	LEAFLTQKVGEQKDDDFEKI	42	26	0		15.165	22.8459	0		0.663798
CTTGAGGCCTTTCTTAACCAGAACTGAAGGATGACGACTTTGAGAAGATCAGTGAGAGATCG	LEAFLNQN*RMTTLRRSVRD	40	26	0		14.4429	22.8459	0		0.632188
CTTGAGGCCTTTCTTACCCAGAAGCAGAGGTGGGAGAACTGAAGGATGACGCCTTTGAGAAG	LEAFLTQKQRWEN*RMTPLR	39	26	0		14.0818	22.8459	0		0.616383
CTTGAGGCCTTTCTTACCCAGAAGCAGATTCTCTCCACAGTTCTCTGTGGGAGAACTGAAGG	LEAFLTQKQILSTVLCGRTE	31	26	0		11.1933	22.8459	0		0.489946
CTTGAGGTGGGAGAACTGAAGGATGACGACTTTGAGAAATCAGTGAGAGATCGGAAGAGCAC	LEVGELKDDDFEKSVRDRKS	26	26	0		9.38789	22.8459	0		0.410922
CTTGAGGCCTTTCTTACCCAGAAGCAGAAGGATGACGACTTTGAGAAGATCAGTGAAGATCG	LEAFLTQKQKDDDFEKISED	26	26	0		9.38789	22.8459	0		0.410922
CTTGAGGCCTTTTGACGACTTTGAGAAGATCAGTGAGAGATCGGAAGAGCACACGTCTGAAC	LEAF*RL*EDQ*EIGRAHV*	23	26	0		8.30467	22.8459	0		0.363508
CTTGAGGCCTTTCTTACCCAGAAGCAGTGGGAGAACTGAAGGATGACGACTTTGAGAGATCA	LEAFLTQKQWEN*RMTTLRD	21	26	0		7.58252	22.8459	0		0.331899
CTTGAGGCCTTTCTTACCCAGAAGCAGAACTGAAGGATGACGACTTTGAGAAGAACAGTGAG	LEAFLTQKQN*RMTTLRRTV	17	26	0		6.13823	22.8459	0		0.26868
CTTGAGGCCTTTCTTACCCAGAAGCTTCAATTTCCTCAGGTGGGAGAACTGAAGGATGACGA	LEAFLTQKLQFPQVGELKDD	9	26	0		3.24965	22.8459	0		0.142242
CTTGAGGCCTTTCTTACCCAGAAGCAGGTCTGGGAGAACTGAAGGATGACGACTTTGAGAAG	LEAFLTQKQVWEN*RMTTLR	7	26	0		2.52751	22.8459	0		0.110633
CTTGAGGCCTTTCTTACCCAGAAGCAGAGAAGAGAACTGAAGCAGGTGGGAGAACTGAAGGA	LEAFLTQKQRRELKQVGELK	6	26	0		2.16644	22.8459	0		0.0948282
CTTGAGGCCTTTCTTACCCAGAAGTAAGGTGGGAGAACTGAAGGATGACGACTTTGAGAAGA	LEAFLTQK*GGRTEG*RL*E	3	26	0		1.08322	22.8459	0		0.0474141
CTTGAGGCCTTTCTTACCCAGAAGCAGAGAAGAGAACTGAAGGATGACGACTTTGAGAAGAT	LEAFLTQKQRRELKDDDFEK	2	26	0		0.722145	22.8459	0		0.0316094
CTTGAGGCCTTTCTTAGGGAGAACTGAAGGATGACGACTTTGAGAAGATCAGTGAGAGATCG	LEAFLREN*RMTTLRRSVRD	0	26	0		0	22.8459	0		0
CTTGAGGCCTTTCTTACCTTTCTTACCCAGAAGCAGGTGGGAGAACTGAAGGATGACGACTT	LEAFLTFLTQKQVGELKDDD	0	26	0		0	22.8459	0		0
CTTGAGGCCTTTCTTACCCATGAGGTGGGAGAACTGAAGGATGACGACTTTGAGAAGATCAG	LEAFLTHEVGELKDDDFEKI	0	26	0		0	22.8459	0		0
CTTGAGGCCTTTCTTACCCATCCTGCTTTGACGACTTTGAGAAGATCAGTGAGAGATCGGAA	LEAFLTHPALTTLRRSVRDR	0	26	0		0	22.8459	0		0
CTTGAGGCCTTTCTTACCCAGAGGTGGGAGATGACGACTTTGAGAAGATCAGTGAGAGATCG	LEAFLTQRWEMTTLRRSVRD	0	26	0		0	22.8459	0		0
CTTGAGGCCTTTCTTACCCAGAAGCTTCTGGGTAAGGTGGGAGAACTGAAGGATGACGACTT	LEAFLTQKLLGKVGELKDDD	0	26	0		0	22.8459	0		0
CTTGAGGCCTTTCTTACCCAGAAGCTCTGGGTGGGAGAACTGAAGGATGACGACTTTGAGAA	LEAFLTQKLWVGELKDDDFE	0	26	0		0	22.8459	0		0
CTTGAGGCCTTTCTTACCCAGAAGCCTTTCTTACCCAGAAGAACTGAAGGATGACGACTTTG	LEAFLTQKPFLPRRTEG*RL	0	26	0		0	22.8459	0		0
CTTGAGGCCTTTCTTACCCAGAAGCAGATACTTCTGGTGGGAGAACTGAAGGATGACGACTT	LEAFLTQKQILLVGELKDDD	0	26	0		0	22.8459	0		0
CTTGAGGCCTTTCTTACCCAGAAGCAGAGACTTTGAGAAGATCAGTGAGAGATCGGAAGAGC	LEAFLTQKQRL*EDQ*EIGR	0	26	0		0	22.8459	0		0
CTTGAGGCCTTTCTTACCCAGAAGCAGAGAACTGAAGAGAACTGAAGGATGACGACTTTGAG	LEAFLTQKQRTEEN*RMTTL	0	26	0		0	22.8459	0		0
CTTGAGGCCTTTCTTACCCAGAAGCAGACCACCACTGAGACTCCACTTCCTTCCACTGACTC	LEAFLTQKQTTTETPLPSTD	0	26	0		0	22.8459	0		0
CTTGAGGCCTTTCTTACCCAGAAGCAGAACTGAAGAGAACTGGGAGAACTGAAGGATGACGA	LEAFLTQKQN*RELGELKDD	0	26	0		0	22.8459	0		0
CTTGAGGCCTTTCTTACCCAGAAGCAGAACTGAAGAACTTTCTTACCCAGAAGCAGAACTGG	LEAFLTQKQN*RTFLPRSRT	0	26	0		0	22.8459	0		0
CTTGAGGCCTTTCTTACCCAGAAGCAGAAACCTGAAACATCGGCATTATCCTCCTGCTTGCA	LEAFLTQKQKPETSALSSCL	0	26	0		0	22.8459	0		0
CTTGAGGCCTTTCTTACCCAGAAGCAAGGCCTCAAGAACTGAAGGATGACGACTTTGAGAAG	LEAFLTQKQGLKN*RMTTLR	0	26	0		0	22.8459	0		0
CTTGAGGCCTTTCTTACCCAGAAGAACTGAAGGATGGGAGACTTTGAGAAGATCAGTGAGAG	LEAFLTQKN*RMGDFEKISE	0	26	0		0	22.8459	0		0
CTTGAGGCCTTTCTTACCCAGAAGAACTGAAGGATGACGACTTAGAAGAACTGAAGGATGAC	LEAFLTQKN*RMTT*KN*RM	0	26	0		0	22.8459	0		0
CTTGAGGCCTTTCTTACCCAGAAACAGAACTGGGTAAGGTGGGAGAACTGAAGGATGACGAC	LEAFLTQKQNWVRWEN*RMT	0	26	0		0	22.8459	0		0
CTTGAGGCCTTTCTTACCCAAGAAAGGAGAACTGAAGGATGACGACTTTGAGAAGATCAGTG	LEAFLTQERRTEG*RL*EDQ	0	26	0		0	22.8459	0		0
CTTGAGGCCTTCAGGTGGGAGAACTGAAGGATGACGACTTTGAGAAGATCAGTGAGAGATCG	LEAFRWEN*RMTTLRRSVRD	0	26	0		0	22.8459	0		0
CTTGAGGCCTTTCTTACCCAGAAGTAGAAGGTGGGAGAACTAAAGGATGACGACTTTGAGAA	LEAFLTQK*KVGELKDDDFE	24	25	535		8.66574	21.9672	193.883		0.394485
CTTGAGGCCTTCTTACCCAGAAGCAGAAGGTGGGAGAACTGAAGGATGACGACTTTGAGAAG	LEAFLPRSRRWEN*RMTTLR	4	25	175		1.44429	21.9672	63.4196		0.0657476
CTTGAGGCCCTTCTTACCCAGAGATAGAAGGTGGGAGAACTAAAGGATGACGACTTTGAGAA	LEALLTQR*KVGELKDDDFE	57	25	57		20.5811	21.9672	20.6567		0.936903
CTTGAGGCCTTTCTTACCCAGAAGCAGAAGGAGGGAGAACTGAAGGATGACGACATTGAGAA	LEAFLTQKQKEGELKDDDIE	3	25	23		1.08322	21.9672	8.33514		0.0493107
CCTGAGGCCTTTCTTACCCAGAAGCAGAAGGAGGGAGAACTGAAGGATGACGACTTTGAGAA	PEAFLTQKQKEGELKDDDFE	2	25	14		0.722145	21.9672	5.07356		0.0328738
CTTGAGGCCTTTCTTACCCAGAAGCAGAGGGGGGAGAACTGAAGGATGACGACTTTGAGAAG	LEAFLTQKQRGEN*RMTTLR	558	25	5		201.479	21.9672	1.81199		9.17179
CTTGAGCCCTTCCTTACCCAGAAGCAGAAGGTGGGAGAACTGAAGGATGACGACTTTGAGAA	LEPFLTQKQKVGELKDDDFE	0	25	1		0	21.9672	0.362397		0
CTTGAGGCCTTTCTTACCCAGACGGTGGGAGAACTGAAGGATGACGACTTTGAGAAGATCAG	LEAFLTQTVGELKDDDFEKI	678	25	0		244.807	21.9672	0		11.1442
CTTGAGGCCTTTCTTACCCAGAACCGAAGGATGACGACTTTGAGAAGATCAGTGAGAGATCG	LEAFLTQNRRMTTLRRSVRD	451	25	0		162.844	21.9672	0		7.41304
CTTGAGGCCTTTCTTACCCAGGACTGAAGGATGACGACTTTGAGAAGATCAGTGAGAGATCG	LEAFLTQD*RMTTLRRSVRD	317	25	0		114.46	21.9672	0		5.21049
CTTGAGGCCTTTCTTACCCAGGTGGGAGAACTGAAGGGTGACGACTTTGAGAAGATCAGTGA	LEAFLTQVGELKGDDFEKIS	145	25	0		52.3555	21.9672	0		2.38335
CTTGAGGCCTTTCTTACCCAGAAGCAGAGGTGGGAGAACTGAAGGATGACGACTTTGGAAGA	LEAFLTQKQRWEN*RMTTLE	108	25	0		38.9958	21.9672	0		1.77518
CTTGAAGCCTTTCTTACCCAGAAGCAGAGGTGGGAGAACTGAAGGATGACGACTTTGAGAAG	LEAFLTQKQRWEN*RMTTLR	92	25	0		33.2187	21.9672	0		1.51219
CTTGAGGCCTTTCCTACCCAGAAGCAGAGAACTGAAGGATGACGACTTTGAGAAGATCAGTG	LEAFPTQKQRTEG*RL*EDQ	70	25	0		25.2751	21.9672	0		1.15058
CTTGAGGCCTTTCTTACCCAGAAGAACTGAAGGATGACGACTTTGAAAGATCAGTGAGAGAT	LEAFLTQKN*RMTTLKDQ*E	69	25	0		24.914	21.9672	0		1.13415
CTTGAGGCCTTTCTTACCCAGAAGCAGAAAGGTGGGAGAACTGAAGGATCACGACTTTGAGA	LEAFLTQKQKGGRTEGSRL*	56	25	0		20.2201	21.9672	0		0.920466
CTTGAGGCCTTTCTTACCCAGAAGCTGAACTGAAGGATGACGACTTTGAGAAGATCAGTGAG	LEAFLTQKLN*RMTTLRRSV	51	25	0		18.4147	21.9672	0		0.838281
CTTGAGGCCTTTCTTACCCAGAAGCAGAACTGAAGGATGACGACTTTGAGAAGATCAGGAGA	LEAFLTQKQN*RMTTLRRSG	48	25	0		17.3315	21.9672	0		0.788971
CTTGAGGCCTTTCTTACCCAGAAGCAGCACTGAAGGATGACGACTTTGAGAAGATCAGTGAG	LEAFLTQKQH*RMTTLRRSV	46	25	0		16.6093	21.9672	0		0.756097
CTTGAGGCCTTTCTTACCCAGAAGCAGAAAGGAGGGAGAACTGACGGATGACGACTTTGAGA	LEAFLTQKQKGGRTDG*RL*	46	25	0		16.6093	21.9672	0		0.756097
CTTGAGGCCTTTCTTACCCAGAAGCAGAACTGAAGGATGACGACTTTGAGAAGATAAGTGAG	LEAFLTQKQN*RMTTLRR*V	38	25	0		13.7208	21.9672	0		0.624602
CTTGAGGCCTTTCTTACTCAGAAGCAGAACTGAAGGATGACGACTTTGAGAAGATCAGTGAG	LEAFLTQKQN*RMTTLRRSV	33	25	0		11.9154	21.9672	0		0.542417
CTTGAGGCCTTTCTTACCCAGAAGCAGAACTGAAGGATGCCGACTTTGAGAAGATCAGTGAG	LEAFLTQKQN*RMPTLRRSV	32	25	0		11.5543	21.9672	0		0.525981
CTTGAGGCCTTTCTTACCCAGAAGCAGAACTGAAGGATGACGACTTTGAGAAGATCAGTAAG	LEAFLTQKQN*RMTTLRRSV	32	25	0		11.5543	21.9672	0		0.525981
CTTGAGGCCTTTCTTACTCCACCTAAGGTGGGAGAACTGAAGGATGACGACTTTGAGAAGAT	LEAFLTPPKVGELKDDDFEK	28	25	0		10.11	21.9672	0		0.460233
CTTGAGGCCTTTCTTACCCAGAAGTAGAGAACTGAAGGATGACGACTTTGAGAAGATCAGTG	LEAFLTQK*RTEG*RL*EDQ	28	25	0		10.11	21.9672	0		0.460233
CTTGAGGCCCTTCTTACCCAGAAGCAGAAGGATGACGACTTTGAGAAGATCAGTGAGAGATC	LEALLTQKQKDDDFEKISER	28	25	0		10.11	21.9672	0		0.460233
CTTGAGGTGGGAGAACTGAAGGATGACGACTTTGAGAAGATCAGTGAGAGATCGGAGAGCAC	LEVGELKDDDFEKISERSES	24	25	0		8.66574	21.9672	0		0.394485
CTTGAGGCCTTTCTTACCCAGAAGCAGAAGGGTGACGACTTTGAGAAGATCAGTGAGAGATC	LEAFLTQKQKGDDFEKISER	22	25	0		7.9436	21.9672	0		0.361612
CTTGAGGCCTTTCTTACCCAAAAGCAGAACTGAAGGATGACGACTTTGAGAAGATCAGTGAG	LEAFLTQKQN*RMTTLRRSV	15	25	0		5.41609	21.9672	0		0.246553
CTTGAGGCCTTTCTTACCCAGAAGCTTCTGGGAGCTAGAGAACTGAAGTGGGAGAACTGAAG	LEAFLTQKLLGARELKWEN*	10	25	0		3.61073	21.9672	0		0.164369
CTTGAGGCCTTTCTTACCAAGAAGCAGAGAACTGAAGGATGACGACTTTGAGAAGATCAGTG	LEAFLTKKQRTEG*RL*EDQ	7	25	0		2.52751	21.9672	0		0.115058
CTTGAGGCCTTTCCTACCCAGAAGGATGACGACTTTGAGAAGATCAGTGAGAGATCGGAAGA	LEAFPTQKDDDFEKISERSE	5	25	0		1.80536	21.9672	0		0.0821845
CTTGAGGCCTTTCTTACCCAGAGAAGGTGGGAGAACTGAAGGATGACGACTTTGAGAAGATC	LEAFLTQRRWEN*RMTTLRR	4	25	0		1.44429	21.9672	0		0.0657476
CTTGAGGCCTTTCTTACCCAGAAGGGTGACGACTTTGAGAAGATCAGTGAGAGATCGGAAGA	LEAFLTQKGDDFEKISERSE	2	25	0		0.722145	21.9672	0		0.0328738
CTTGAGGCCTTTCTTACCCAGAAGCAGTGGGGAGAACTGAAGGATGACGACTTTGAGAAGAT	LEAFLTQKQWGELKDDDFEK	1	25	0		0.361073	21.9672	0		0.0164369
CTTGAGGCGGATGACGACTTTGAGAAGATCAGTGAGAGATCGGAAGAGCACACGTCTGAACT	LEADDDFEKISERSEEHTSE	0	25	0		0	21.9672	0		0
CTTGAGGCCTTTCTTACCTCAACTTCTTCTTCGACTTTGAGAAGATCAGTGAGAGATCGGAA	LEAFLTSTSSSTLRRSVRDR	0	25	0		0	21.9672	0		0
CTTGAGGCCTTTCTTACCCAGAATGGGAGAACTGAAGGATGACGACTTTGAGAAGATCAGTG	LEAFLTQNGRTEG*RL*EDQ	0	25	0		0	21.9672	0		0
CTTGAGGCCTTTCTTACCCAGAAGTGTGGGAGAACTGAAGGATGACGACTTTGAGAAGATCA	LEAFLTQKCGRTEG*RL*ED	0	25	0		0	21.9672	0		0
CTTGAGGCCTTTCTTACCCAGAAGTAAGACAGTAGAGACAGGTGGGAGAACTGAAGGATGAC	LEAFLTQK*DSRDRWEN*RM	0	25	0		0	21.9672	0		0
CTTGAGGCCTTTCTTACCCAGAAGGTAAGAAAGAAGGTGGGAGAACTGAAGGATGACGACTT	LEAFLTQKVRKKVGELKDDD	0	25	0		0	21.9672	0		0
CTTGAGGCCTTTCTTACCCAGAAGCTTCTCCCAGGTGGGAGAACTGAAGGATGACGACTTTG	LEAFLTQKLLPGGRTEG*RL	0	25	0		0	21.9672	0		0
CTTGAGGCCTTTCTTACCCAGAAGCTATGTCTTCTGGTGGGAGAACTGAAGGATGACGACTT	LEAFLTQKLCLLVGELKDDD	0	25	0		0	21.9672	0		0
CTTGAGGCCTTTCTTACCCAGAAGCCTCAAGGTGGGAGAACTGAAGGATGACGACTTTGAGA	LEAFLTQKPQGGRTEG*RL*	0	25	0		0	21.9672	0		0
CTTGAGGCCTTTCTTACCCAGAAGCAGATACTCCCAGGCCAGGTGCAGTGGCTTGTGCCTGT	LEAFLTQKQILPGQVQWLVP	0	25	0		0	21.9672	0		0
CTTGAGGCCTTTCTTACCCAGAAGCAGAGACTCTTCAGAGAACTGAAGGATGACGACTTTGA	LEAFLTQKQRLFRELKDDDF	0	25	0		0	21.9672	0		0
CTTGAGGCCTTTCTTACCCAGAAGCAGAGAACTTCTGGGAGAACTGAAGGATGACGACTTTG	LEAFLTQKQRTSGRTEG*RL	0	25	0		0	21.9672	0		0
CTTGAGGCCTTTCTTACCCAGAAGCAGAAGGTGCTTACCAGAAGGTGGGAGAACTGAAGGAT	LEAFLTQKQKVLTRRWEN*R	0	25	0		0	21.9672	0		0
CTTGAGGCCTTTCTTACCCAGAAGCAGAAGCAGAAGAAGGTGGGAGAACTGAAGGATGACGA	LEAFLTQKQKQKKVGELKDD	0	25	0		0	21.9672	0		0
CTTGAGGCCTTTCTTACCCAGAAGCAGAAGAACTGAAGATGACGACTTTGAGAAGATCAGTG	LEAFLTQKQKN*R*RL*EDQ	0	25	0		0	21.9672	0		0
CTTGAGGCCTTTCTTACCCAGAAGCAGAACTGAAGGGTGGGAGAACTGAAGGATGACGACTT	LEAFLTQKQN*RVGELKDDD	0	25	0		0	21.9672	0		0
CTTGAGGCCTTTCTTACCCAGAAGCAGAACTGAAGGGAGAACTGAAGGGAGAACTGAAGGAT	LEAFLTQKQN*REN*REN*R	0	25	0		0	21.9672	0		0
CTTGAGGCCTTTCTTACCCAGAAGCAGAACTGAAGGAGACGACTTTGAGAAGATCAGTGAGA	LEAFLTQKQN*RRRL*EDQ*	0	25	0		0	21.9672	0		0
CTTGAGGCCTTTCTTACCCAGAAGCAGAACTGAAGATGACGACGACTTTGAGAAGATCAGTG	LEAFLTQKQN*R*RRL*EDQ	0	25	0		0	21.9672	0		0
CTTGAGGCCTTTCTTACCCAGAAGCAGAACTGAACAGTGGGAGAACTGAAGGATGACGACTT	LEAFLTQKQN*TVGELKDDD	0	25	0		0	21.9672	0		0
CTTGAGGCCTTTCTTACCCAGAAGCAGAAAGGAGAACTGAAGGATGACGACTTTGAGAAGAT	LEAFLTQKQKGELKDDDFEK	0	25	0		0	21.9672	0		0
CTTGAGGCCTTTCTTACCCAGAAGCAGAAACTGGGAGAAGTTCTCCCACTGGGAGAACTGAA	LEAFLTQKQKLGEVLPLGEL	0	25	0		0	21.9672	0		0
CTTGAGGCCTTTCTTACCCAGAAGCAAGGGTAAGAGAACTGAAGTGGGAGAACTGAAGGATG	LEAFLTQKQG*EN*SGRTEG	0	25	0		0	21.9672	0		0
CTTGAGGCCTTTCTTACCCAGAAGCAAGAAAGATGACGACTTTGAGAAGATCAGTGAGAGAT	LEAFLTQKQER*RL*EDQ*E	0	25	0		0	21.9672	0		0
CTTGAGGCCTTTCTTACCCAGAAGAAAGGTAAGAGAACTTTCTTCTTGTGGGAGAACTGAAG	LEAFLTQKKGKRTFFLWEN*	0	25	0		0	21.9672	0		0
CTTGAGGCCTTTCTTACCCAGAACTGGGTGGGAGAACTGAAGGATGACGACTTTGAGAAGAT	LEAFLTQNWVGELKDDDFEK	0	25	0		0	21.9672	0		0
CTTGAGGCCTTTCTTACCCAGAACTGGATGACGACTTTGAGAAGATCAGTGAGAGATCGGAA	LEAFLTQNWMTTLRRSVRDR	0	25	0		0	21.9672	0		0
CTTGAGGCCTTTCTTACCCAGAAAGCAGAAGGTGGGAGAACTGAAGGATGACGACTTTGAGA	LEAFLTQKAEGGRTEG*RL*	0	25	0		0	21.9672	0		0
CTTGAGGCCTTTCTTACCCAGAAAGAACTGAAGATGACGAGAACTGATGGAGAACTGAAGGA	LEAFLTQKELKMTRTDGELK	0	25	0		0	21.9672	0		0
CTTGAGGCCTTTCTTACCCAAGAAAGGTGGGAGAACTGAAGGATGACGACTTTGAGAAGATC	LEAFLTQERWEN*RMTTLRR	0	25	0		0	21.9672	0		0
CTTGAGGCCTTTATGACGACTTTGAGAAGATCAGTGAGAGATCGGAAGAGCACACGTCTGAA	LEAFMTTLRRSVRDRKSTRL	0	25	0		0	21.9672	0		0
CTTGAGGCCTTTACCCAGGTGGGAGAACTGAAGGATGACGACTTTGAGAAGATCAGTGAGAG	LEAFTQVGELKDDDFEKISE	0	25	0		0	21.9672	0		0
CTTGAGGCCTTGAGGCCTTTCTTACCCAGAAGCAGTAAGGTGGGAGAACTGAAGGATGACGA	LEALRPFLPRSSKVGELKDD	0	25	0		0	21.9672	0		0
CTTGAGGCCTTTCTTACCCAGAAGCAGAAGGTGGGAGAACTGAAGGATGAGGACTTTGAGAA	LEAFLTQKQKVGELKDEDFE	4	24	173		1.44429	21.0885	62.6948		0.0684871
CTTGAGGCCTTTCTTACCCAGAAGCAGAAGGAGGGAGAACAGAAGGATGACGACTTTGAGAA	LEAFLTQKQKEGEQKDDDFE	2	24	30		0.722145	21.0885	10.8719		0.0342435
CTTGAGGCCTTTCTTACCCAGAAGCAGAAGGAGGGAGAACTGAAGGATGACGACTCTGAGAA	LEAFLTQKQKEGELKDDDSE	1	24	7		0.361073	21.0885	2.53678		0.0171218
CTTGAGGCCTTTCTTACCCAGAAGCAGAAAGAGGGAGAACTGAAGGATGACGACTTTGAGAA	LEAFLTQKQKEGELKDDDFE	4	24	6		1.44429	21.0885	2.17438		0.0684871
CTTGAGGCCTTTCTTCCCCAGAAGAAGAAGGTGGGAGAACTGAAGGATGACGCCTTTGAGAA	LEAFLPQKKKVGELKDDAFE	0	24	4		0	21.0885	1.44959		0
CTTGAGGCCTTTCTTACCCAGAAGCAGAACCAGAAGCAGGTGGGAGAACTGAAGGATGACGA	LEAFLTQKQNQKQVGELKDD	19976	24	0		7212.79	21.0885	0		342.024
CTTGAGGCCTTTCTTACCCAGAAGCTTTCTCCAGTGGGAGAACTGAAGGATGACGACTTTGA	LEAFLTQKLSPVGELKDDDF	2070	24	0		747.42	21.0885	0		35.442
CTTGAGGCCTTTCTTACCCAGAAGCAGAACTGAACTGAAGGATGACGAGTTCAGTTCAGGAT	LEAFLTQKQN*TEG*RVQFR	408	24	0		147.318	21.0885	0		6.98568
CTTGAGGCCTTTCTTACCCAGAAGCAGAGAACTTCTCTGCAGGTGGGAGAACTGAAGGATGA	LEAFLTQKQRTSLQVGELKD	280	24	0		101.1	21.0885	0		4.79409
CTTGAGGCCTTTCTTACCCAGGTGGGAGAACTGAAGGACGACGACTTTGAGAAGATCAGTGA	LEAFLTQVGELKDDDFEKIS	132	24	0		47.6616	21.0885	0		2.26007
CTTGAGGCCTTTCTTACCCAGAAGCAGGTGGGAGAACTGAAGGATGACGACTTTGAGATCAG	LEAFLTQKQVGELKDDDFEI	98	24	0		35.3851	21.0885	0		1.67793
CTTGAGGCCTTTCTTACCCAGAAGCAGAAAGGTGGGAGAACTGAAGGATGACGACTCTGAGA	LEAFLTQKQKGGRTEG*RL*	93	24	0		33.5798	21.0885	0		1.59232
CTTGAGGCCTTTCTTACCCAGAAGCAGAGAACTGGAGGATGACGACTTTGAGAAGATCAGTG	LEAFLTQKQRTGG*RL*EDQ	72	24	0		25.9972	21.0885	0		1.23277
CTTGAGGCCTTTCTTACCCAGAAGGTGGGAGAACTGAAGGATGACGACTTTGGAAGATCAGT	LEAFLTQKVGELKDDDFGRS	62	24	0		22.3865	21.0885	0		1.06155
CTTGAGGCCTTACTTACCCAGAAGCAGGTGGGAGAACTGAAGGATGACGACTTTGAGAAGAT	LEALLTQKQVGELKDDDFEK	60	24	0		21.6644	21.0885	0		1.02731
CTTGAGGCCTTTCTTACCCAGAAGCAGGTGGGAGAACTGAAGGAGGACGACTTTGAGAAGAT	LEAFLTQKQVGELKEDDFEK	56	24	0		20.2201	21.0885	0		0.958819
CTTGAGGCCTTTCTTACCCAGAAGCAAGGAGAACTGAAGGATGACGACTTTGAGAAGATCAG	LEAFLTQKQGELKDDDFEKI	53	24	0		19.1368	21.0885	0		0.907453
CTTGAGGCCTTTCTTACCCAGAAGCAGAGGTGGGAGAACTGAAGGATGACGACTTTGAGACG	LEAFLTQKQRWEN*RMTTLR	46	24	0		16.6093	21.0885	0		0.787601
CTTGAGGCCTTTCTTACCCAGAAGCAGAGAACTGAAGGATGACGACTTTGAGAAGATTAGTG	LEAFLTQKQRTEG*RL*ED*	42	24	0		15.165	21.0885	0		0.719114
CTTGAGGCCTTTCTTACCCAGAAGCAGACAGGTGGGAGAACTGAAGGATGACGACTTTGAAA	LEAFLTQKQTGGRTEG*RL*	41	24	0		14.804	21.0885	0		0.701992
CTTGAGGCCTTTCTTACCCAGAAGCAGAAGCAGAAGCAGAAGGTGGGAGAACTGAAGGATGA	LEAFLTQKQKQKQKVGELKD	32	24	0		11.5543	21.0885	0		0.547896
CTTGAGGCCGTTCTTACCCAGAAGCAGGTGGGAGAACTGAAGGATGACGACTTTGAGAAGAT	LEAVLTQKQVGELKDDDFEK	31	24	0		11.1933	21.0885	0		0.530775
CTTGAGGCCTTTCTTACCCAGAAGCAGAAAGGAGGGAGAACTGAAGGCTGACGACTTTGAGA	LEAFLTQKQKGGRTEG*RL*	23	24	0		8.30467	21.0885	0		0.393801
CTTGAGGTGGGAGAACTGAAGGATGACGACTTTGAGAGATCAGTGAGAGATCGGAAGAGCAC	LEVGELKDDDFERSVRDRKS	19	24	0		6.86038	21.0885	0		0.325313
CTTGAGGCCTTTCTTAACCAGGTGGGAGAACTGAAGGATGACGACTTTGAGAAGATCAGTGA	LEAFLNQVGELKDDDFEKIS	14	24	0		5.05502	21.0885	0		0.239705
CTTGAGACGACTTTGAGAAGATCAGTGAGAGATCGGAAGAGCACACGTCTGAACTCCAGTCA	LETTLRRSVRDRKSTRLNSS	10	24	0		3.61073	21.0885	0		0.171218
CTTGAGGCCTTTCTTCCCCAGAAGCAGAGAACTGAAGGATGACGACTTTGAGAAGATCAGTG	LEAFLPQKQRTEG*RL*EDQ	9	24	0		3.24965	21.0885	0		0.154096
CTTGAGGCCTTTCTTACCCAGAAAGAAGGTGGGAGAACTGAAGGATGACGACTTTGAGAAGA	LEAFLTQKEGGRTEG*RL*E	8	24	0		2.88858	21.0885	0		0.136974
CTTGAGGCCTTTCTTACCCAGAAGCTGACGACTTTGAGAAGATCAGTGAGAGATCGGAAGAG	LEAFLTQKLTTLRRSVRDRK	1	24	0		0.361073	21.0885	0		0.0171218
CTTGAGGGTGGGCGAACTGAAGGATGACGACTTTGAGAAGATCAGTGAGAGATCGGAAGAGC	LEGGRTEG*RL*EDQ*EIGR	0	24	0		0	21.0885	0		0
CTTGAGGCCTTTCTTCCCAAGAAGCAGAGGTGGGAGAACTGAAGGATGACGACTTTGAGAAG	LEAFLPKKQRWEN*RMTTLR	0	24	0		0	21.0885	0		0
CTTGAGGCCTTTCTTACTTTTCAGGTGGGAGAACTGAAGGATGACGACTTTGAGAAGATCAG	LEAFLTFQVGELKDDDFEKI	0	24	0		0	21.0885	0		0
CTTGAGGCCTTTCTTACCCAGGTAAGAACTGAAGGATGACGACTTTGAGAAGATCAGTGAGA	LEAFLTQVRTEG*RL*EDQ*	0	24	0		0	21.0885	0		0
CTTGAGGCCTTTCTTACCCAGATGAAGGATGACGACTTTGAGAAGATCAGTGAGAGATCGGA	LEAFLTQMKDDDFEKISERS	0	24	0		0	21.0885	0		0
CTTGAGGCCTTTCTTACCCAGAGGCCTTTCTTACCAGAAGGTGGGAGAACTGAAGGATGACG	LEAFLTQRPFLPEGGRTEG*	0	24	0		0	21.0885	0		0
CTTGAGGCCTTTCTTACCCAGAAGTTCCAGGTGGGAGAACTGAAGGATGACGACTTTGAGAA	LEAFLTQKFQVGELKDDDFE	0	24	0		0	21.0885	0		0
CTTGAGGCCTTTCTTACCCAGAAGCTTCTTGGAGAACTGAAGGATGACGACTTTGAGAAGAT	LEAFLTQKLLGELKDDDFEK	0	24	0		0	21.0885	0		0
CTTGAGGCCTTTCTTACCCAGAAGCCTTGAGAACTGAAGGATGACGACTTTGAGAAGATCAG	LEAFLTQKP*ELKDDDFEKI	0	24	0		0	21.0885	0		0
CTTGAGGCCTTTCTTACCCAGAAGCATGAAGAAGGTGGGAGAACTGAAGGATGACGACTTTG	LEAFLTQKHEEGGRTEG*RL	0	24	0		0	21.0885	0		0
CTTGAGGCCTTTCTTACCCAGAAGCATCTTACCCAGAAGCATCTTACCCAGAAGCATCTTAC	LEAFLTQKHLTQKHLTQKHL	0	24	0		0	21.0885	0		0
CTTGAGGCCTTTCTTACCCAGAAGCATCCTTACTGAAGGATGACGACTTTGAGAAGATCAGT	LEAFLTQKHPY*RMTTLRRS	0	24	0		0	21.0885	0		0
CTTGAGGCCTTTCTTACCCAGAAGCAGTTCTTACCCAGAACTGAAGGATGACGACTTTGAGA	LEAFLTQKQFLPRTEG*RL*	0	24	0		0	21.0885	0		0
CTTGAGGCCTTTCTTACCCAGAAGCAGTTCTCCCACTGAAGGATGACGACTTTGAGAAGATC	LEAFLTQKQFSH*RMTTLRR	0	24	0		0	21.0885	0		0
CTTGAGGCCTTTCTTACCCAGAAGCAGTGAGAAGGTGGGAGAACTGAAGGATGACGACTTTG	LEAFLTQKQ*EGGRTEG*RL	0	24	0		0	21.0885	0		0
CTTGAGGCCTTTCTTACCCAGAAGCAGTATCTTGAGTATCTCCACTTATTTGATTACTGCTT	LEAFLTQKQYLEYLHLFDYC	0	24	0		0	21.0885	0		0
CTTGAGGCCTTTCTTACCCAGAAGCAGCAGCGAAAGCGCCTTGAGGCCTTTCTTACCCAGAA	LEAFLTQKQQRKRLEAFLTQ	0	24	0		0	21.0885	0		0
CTTGAGGCCTTTCTTACCCAGAAGCAGAGGTCTGGTGGGCCACACTCTGAATGCATAGCGGA	LEAFLTQKQRSGGPHSECIA	0	24	0		0	21.0885	0		0
CTTGAGGCCTTTCTTACCCAGAAGCAGAAGTTGGGAAGAACTGAAGGTGGGAGAACTGAAGG	LEAFLTQKQKLGRTEGGRTE	0	24	0		0	21.0885	0		0
CTTGAGGCCTTTCTTACCCAGAAGCAGAACTTCAGAAGCAGAAGCAGAAGGAGAACTGAAGG	LEAFLTQKQNFRSRSRRRTE	0	24	0		0	21.0885	0		0
CTTGAGGCCTTTCTTACCCAGAAGCAGAACTGAAGGATGACTGAAGGGAGAACTGAAGGATG	LEAFLTQKQN*RMTEGRTEG	0	24	0		0	21.0885	0		0
CTTGAGGCCTTTCTTACCCAGAAGCAGAACTGAAGATGACTGTCTGAAGGATGACGACTTTG	LEAFLTQKQN*R*LSEG*RL	0	24	0		0	21.0885	0		0
CTTGAGGCCTTTCTTACCCAGAAGCAGAACTGAAGATGACTGAAGGATGACGACTTTGAGAA	LEAFLTQKQN*R*LKDDDFE	0	24	0		0	21.0885	0		0
CTTGAGGCCTTTCTTACCCAGAAGAACTGAAGAATGAAGAACTGAAGGATGACGACTTTGAG	LEAFLTQKN*RMKN*RMTTL	0	24	0		0	21.0885	0		0
CTTGAGGCCTTTCTTACCCAGAAAGGGTAAGAAAGATGACGACTTTGAGAAGATCAGTGAGA	LEAFLTQKG*ER*RL*EDQ*	0	24	0		0	21.0885	0		0
CTTGAGGCCTTTCTTACCCACTTTCTTACCCAGAAGGTGGGAGAACTGAAGGATGACGACTT	LEAFLTHFLTQKVGELKDDD	0	24	0		0	21.0885	0		0
CTTGAGGCCTTTCTCTCCCAGGTGGGAGAACTGAAGGATGACGACTTTGAGAAGATCAGTGA	LEAFLSQVGELKDDDFEKIS	0	24	0		0	21.0885	0		0
CTTGAGGCCTTTCTCGACTTTGAGAAGATCAGTGAGAGATCGGAAGAGCACACGTCTGAACT	LEAFLDFEKISERSEEHTSE	0	24	0		0	21.0885	0		0
CTCTGAAGGATGACGACTTTGAGAAGATCAGTGAGAGATCGGAAGAGCACACGTCTGAACTC	L*RMTTLRRSVRDRKSTRLN	0	24	0		0	21.0885	0		0
CTTGTGGCTTTTCTTACCCAGAAGCAGAAGGTGGGAGAACTGAAGGATGACGACTTTGAGAA	LVAFLTQKQKVGELKDDDFE	1	23	60		0.361073	20.2098	21.7438		0.0178662
CTTGAGGCCTTTCTTACCCAGAGCTAGAAGGTGGGAGAACTAAAGGATGACGACTTTGAGAA	LEAFLTQS*KVGELKDDDFE	231	23	38		83.4078	20.2098	13.7711		4.12709
CTTGAGGCCTTTCTTACCAAGAAGCAGAAGGTGGGAGACCTGAAGGATGACGACTTTGAGAA	LEAFLTKKQKVGDLKDDDFE	0	23	20		0	20.2098	7.24795		0
CCTGAGGCCTTTCTTACCCAGAACTGAAGGATGACGACTTTGAGAAGATCAGTGAGAGATCG	PEAFLTQN*RMTTLRRSVRD	336	23	0		121.32	20.2098	0		6.00304
CTTGAGGCCTTTCTTACCCAGAAGCCGGTGGGAGAACTGAAGGATGACGACTTTGAGAAGAT	LEAFLTQKPVGELKDDDFEK	180	23	0		64.9931	20.2098	0		3.21591
CTTGAGGCCTTTCTTACCCAGAAGCAGAAAGGTGGGAGAACTGATGGATGACGACTTTGAGA	LEAFLTQKQKGGRTDG*RL*	136	23	0		49.1059	20.2098	0		2.4298
CTTGAGGCCTTTCCTACCCAGGTGGGAGAACTGAAGGATGACGACTTTGAGAAGATCAGTGA	LEAFPTQVGELKDDDFEKIS	123	23	0		44.4119	20.2098	0		2.19754
CTTGAGGCCTTTCTTACCCAGAAGCAGAAAGGTGGGAGAACTGAAGGATGACGGCTTTGAGA	LEAFLTQKQKGGRTEG*RL*	114	23	0		41.1623	20.2098	0		2.03675
CTTGAGGCCTTTCTTACCCAGAAGCAGATGGGAGAACTGAAGCAGGTGGGAGAACTGAAGGA	LEAFLTQKQMGELKQVGELK	112	23	0		40.4401	20.2098	0		2.00101
CTTGAGGCCTTTCTTACCCAGAAGCAGAAAGGTGGGAGAACTGAAGGATGACGACTTTGAAG	LEAFLTQKQKGGRTEG*RL*	103	23	0		37.1905	20.2098	0		1.84022
CTTGAGGCCTTTCTTACCCAGAAGCAGAGTGCACTCCTTATGAGCATCTAATGCCTGATGAT	LEAFLTQKQSALLMSI*CLM	96	23	0		34.663	20.2098	0		1.71515
CCTGAGGCCTTTCTTACCCAGGTGGGAGAACTGAAGGATGACGACTTTGAGAAGATCAGTGA	PEAFLTQVGELKDDDFEKIS	94	23	0		33.9408	20.2098	0		1.67942
CTTGAGGCCTTTCTTACCCCGAAGCAGAGGTGGGAGAACTGAAGGATGACGACTTTGAGAAG	LEAFLTPKQRWEN*RMTTLR	92	23	0		33.2187	20.2098	0		1.64369
CTTGAGGCCTTTCTTACCCAGAAGCAGAAAGGGGGGAGAACTGAAGGATGACGCCTTTGAGA	LEAFLTQKQKGGRTEG*RL*	92	23	0		33.2187	20.2098	0		1.64369
CTTGAGGCCTTTCTACCCAGAAGCAGAAAGGTGGGAGAACTGAAGGATGACGACTTTGAGAA	LEAFLPRSRKVGELKDDDFE	85	23	0		30.6912	20.2098	0		1.51863
CTTGAGGCCTTTCTTACCCAGAAGGTGGGAGAACTGAAGGATGATGACTTTGAGAAGATCAG	LEAFLTQKVGELKDDDFEKI	80	23	0		28.8858	20.2098	0		1.42929
CTTGAGGCCTTTCTTACCCAGAAGGTGGGAGAACTGAAGGATAACGACTTTGAGAAGATCAG	LEAFLTQKVGELKDNDFEKI	78	23	0		28.1637	20.2098	0		1.39356
CTTGAGGCCTTTCTTACCCAGAAGCAGAGAGGGGGGAGAACTGAAGGATGACGACTTTGAGA	LEAFLTQKQRGGRTEG*RL*	73	23	0		26.3583	20.2098	0		1.30423
CTTGAGGCCTTTCTTACCCAGAAGCAGAAAGGTGGGAGAACTGAATGATGACGACTTTGAGA	LEAFLTQKQKGGRTE**RL*	72	23	0		25.9972	20.2098	0		1.28637
CTTGAGGCCTTTCTTACCCAGAAGCAGAAAGGTGGGAGAACTGAAGGATGACGACTTTGACA	LEAFLTQKQKGGRTEG*RL*	61	23	0		22.0254	20.2098	0		1.08984
CTTGAGGCCTTTCTTACCCAGAAGCAGGAGGGGGAACTGAAGGATGACGACTTTGAGAAGAT	LEAFLTQKQEGELKDDDFEK	54	23	0		19.4979	20.2098	0		0.964774
CTTGAGGCCTTTCTTACCCAGAAGCAGAACTGAAGGATGACAACTTTGAGAAGATCAGTGAG	LEAFLTQKQN*RMTTLRRSV	48	23	0		17.3315	20.2098	0		0.857577
CTTGAGGCCTTTCTTACCCAGAAGCAGAGGTGGGCGAACTGAAGGATGACGACTTTGAGAAG	LEAFLTQKQRWAN*RMTTLR	45	23	0		16.2483	20.2098	0		0.803978
CTTGAGGCCTTTCTTACCCAGAAGGTGGGAAAACTGAAGGATGACGACTTTGAGAAGATCAG	LEAFLTQKVGKLKDDDFEKI	38	23	0		13.7208	20.2098	0		0.678915
CTTGAGGCCTTTCTTACCCAGAAGCAGAACTGAAGGATGACGACTTTGAGAAAATCAGTGAG	LEAFLTQKQN*RMTTLRKSV	36	23	0		12.9986	20.2098	0		0.643183
CTTGAGGCCTTTCTTACCCAGAACTGAAGCAGAACTGAAGGATGACGACTTTGAGAAGATCA	LEAFLTQN*SRTEG*RL*ED	27	23	0		9.74896	20.2098	0		0.482387
CTTGAGGCCTTTCTTACCCAGAAGCAGAACTGAAGGATGACGACTTTTAGAAGATCAGTGAG	LEAFLTQKQN*RMTTFRRSV	25	23	0		9.02682	20.2098	0		0.446655
CTTGAGGCCTTTCTTACCCAGAAGCAGGGTAAGGTGGGAGAACTGAAGGATGACGACTTTGA	LEAFLTQKQGKVGELKDDDF	24	23	0		8.66574	20.2098	0		0.428788
CTTGAGGCCTTTCTTACCCGGAGAACTGAAGGATGACGACTTTGAGAAGATCAGTGAGAGAT	LEAFLTRRTEG*RL*EDQ*E	22	23	0		7.9436	20.2098	0		0.393056
CTTGAGGCCTTCCTTACCCAGAAGCAGAAGGATGACGACTTTGAGAAGATCAGTGAGAGATC	LEAFLTQKQKDDDFEKISER	21	23	0		7.58252	20.2098	0		0.37519
CTTGAGGCCTTTCTTACCCAGAAGCTTCTGGACCAACAGGTGGGAGAACTGAAGGATGACGA	LEAFLTQKLLDQQVGELKDD	17	23	0		6.13823	20.2098	0		0.303725
CTTGAGACCTTTCTTACCCAGAAGCAGAACTGAAGGATGACGACTTTGAGAAGATCAGTGAG	LETFLTQKQN*RMTTLRRSV	16	23	0		5.77716	20.2098	0		0.285859
CTTGAGGCCTTTCGGTGGGAGAACTGAAGGATGACGACTTTGAGAAGATCAGTGAGAGATCG	LEAFRWEN*RMTTLRRSVRD	13	23	0		4.69394	20.2098	0		0.23226
CTTGAGGCCTTTCTTACCCAGAAGCTTCTTTCTTACCCAGAAGTGGGAGAACTGAAGGATGA	LEAFLTQKLLSYPEVGELKD	11	23	0		3.9718	20.2098	0		0.196528
CTTGAGGCCTTTCTTACCCAGAAGGGTAAGAACTGAAGGATGACGACTTTGAGAAGATCAGT	LEAFLTQKGKN*RMTTLRRS	10	23	0		3.61073	20.2098	0		0.178662
CTTGAGGCCTTTCTTACCCATAAGGTGGGAGAACTGAAGGATGACGACTTTGAGAAGATCAG	LEAFLTHKVGELKDDDFEKI	8	23	0		2.88858	20.2098	0		0.142929
CTTGAGGCCTTTCTTACCCAGAAGCAGAAGAAGGAGGGAGAACTGAAGGATGACGACTTTGA	LEAFLTQKQKKEGELKDDDF	5	23	0		1.80536	20.2098	0		0.0893309
CTTGAGGCCTTTCTTACCCAGAAGCAGATGGGAGAAGCAGGTGGGAGAACTGAAGGATGACG	LEAFLTQKQMGEAGGRTEG*	3	23	0		1.08322	20.2098	0		0.0535986
CTTGAGGCCTTTCTTATGAAGGATGACGACTTTGAGAAGATCAGTGAGAGATCGGAAGAGCA	LEAFLMKDDDFEKISERSEE	2	23	0		0.722145	20.2098	0		0.0357324
CTTGAGGCCTTTCTTACCCAGAAGGAAGAACTGAAGGATGACGACTTTGAGAAGATCAGTGA	LEAFLTQKEELKDDDFEKIS	2	23	0		0.722145	20.2098	0		0.0357324
CTTGAGGCCTTTCTTACCCAGAAGCAGAGAGGTGGAGAACTGAAGGATGACGACTTTGAGAA	LEAFLTQKQRGGELKDDDFE	1	23	0		0.361073	20.2098	0		0.0178662
CTTGAGGCCTTTCTTACCCAGTTGTGGGAGAACTGAAGGATGACGACTTTGAGAAGATCAGT	LEAFLTQLWEN*RMTTLRRS	0	23	0		0	20.2098	0		0
CTTGAGGCCTTTCTTACCCAGGTGCTTCCAGGTGGGAGAACTGAAGGATGACGACTTTGAGA	LEAFLTQVLPGGRTEG*RL*	0	23	0		0	20.2098	0		0
CTTGAGGCCTTTCTTACCCAGGGATGACGACTTTGAGAAGATCAGTGAGAGATCGGAAGAGC	LEAFLTQG*RL*EDQ*EIGR	0	23	0		0	20.2098	0		0
CTTGAGGCCTTTCTTACCCAGAAGTGGTAAGAAACTGTGGGAGAACTGAAGGATGACGACTT	LEAFLTQKW*ETVGELKDDD	0	23	0		0	20.2098	0		0
[truncated: 8,005 more rows]
