# Supplementary material for: Creation of Novel Protein Variants with CRISPR/Cas9-Mediated Mutagenesis: Turning a Screening By-Product into a Discovery Tool
Source: PLoS One. 2017 Jan 24;12(1):e0170445. doi: 10.1371/journal.pone.0170445 (PMC5261743; doi:10.1371/journal.pone.0170445)
Supplement: S2 Table — (XLSX) [file pone.0170445.s004.xlsx]

## Sheet: EGFP
Query	Subject	QueryID	btop	Number of mismatches	Number of insertions	Number of deletions	Position of mismatches	Position of insertions	Position of deletions	First position of insertion	First position of deletion	Query Length
CTTGAGGCCTTTCTTACCCAGAAGCAGAAGGTGGGAGAACTGAAGGATGACGACTTTGAG	CTTGAGGCCTTTCTTACCCAGAAGCAGAAGGTGGGAGAACTGAAGGATGACGACTTTGAG	var103	60	0	0	2	-	-	61,62	-	61	60
CTTGAGGCCTTTCTTACCCAGAAGCAGAAGGTGGGAGAACTGAAGGATGACGACTTTGAG	CTTGAGGCCTTTCTTACCCAGAAGCAGAAGGTGGGAGAACTGAAGGATGACGACTTTGAG	var156	60	0	0	2	-	-	61,62	-	61	60
CTTGAGGCCTTTCTTACCCAGAAGCAGAAGGTGGGAGAACTGAAGGATGACGACTTTGAGA	CTTGAGGCCTTTCTTACCCAGAAGCAGAAGGTGGGAGAACTGAAGGATGACGACTTTGAGA	var157	61	0	0	1	-	-	62	-	62	61
TTGAGGCCTTTCTTACCCAGAAGCAGAAGGTGGGAGAACTGAAGGATGACGACTTTGAGAA	TTGAGGCCTTTCTTACCCAGAAGCAGAAGGTGGGAGAACTGAAGGATGACGACTTTGAGAA	var164	61	0	0	1	-	-	1	-	1	61
CTTGAGGCCTTTCTTACCCAGAAGCAGAAGGTGGGAGAACTGAAGGATGACGACTTTGA	CTTGAGGCCTTTCTTACCCAGAAGCAGAAGGTGGGAGAACTGAAGGATGACGACTTTGA	var168	59	0	0	3	-	-	60,61,62	-	60	59
CTTGAGGCCTTTCTTACCCAGAAGCAGAAGGTGGGAGAACTGAAGGATGACGACTTTGAGA	CTTGAGGCCTTTCTTACCCAGAAGCAGAAGGTGGGAGAACTGAAGGATGACGACTTTGAGA	var173	61	0	0	1	-	-	62	-	62	61
TGAGGCCTTTCTTACCCAGAAGCAGAAGGTGGGAGAACTGAAGGATGACGACTTTGAGAA	TGAGGCCTTTCTTACCCAGAAGCAGAAGGTGGGAGAACTGAAGGATGACGACTTTGAGAA	var196	60	0	0	2	-	-	1,2	-	1	60
TTGAGGCCTTTCTTACCCAGAAGCAGAAGGTGGGAGAACTGAAGGATGACGACTTTGAGAA	TTGAGGCCTTTCTTACCCAGAAGCAGAAGGTGGGAGAACTGAAGGATGACGACTTTGAGAA	var210	61	0	0	1	-	-	1	-	1	61
AGGCCTTTCTTACCCAGAAGCAGAAGGTGGGAGAACTGAAGGATGACGACTTTGAGAA	AGGCCTTTCTTACCCAGAAGCAGAAGGTGGGAGAACTGAAGGATGACGACTTTGAGAA	var241	58	0	0	4	-	-	1,2,3,4	-	1	58
CTTGAGGCCTTTCTTACCCAGAAGCAGAAGGTGGGAGAACTGAAGGATGACGACTTTGAG	CTTGAGGCCTTTCTTACCCAGAAGCAGAAGGTGGGAGAACTGAAGGATGACGACTTTGAG	var242	60	0	0	2	-	-	61,62	-	61	60
TGAGGCCTTTCTTACCCAGAAGCAGAAGGTGGGAGAACTGAAGGATGACGACTTTGAGAA	TGAGGCCTTTCTTACCCAGAAGCAGAAGGTGGGAGAACTGAAGGATGACGACTTTGAGAA	var26	60	0	0	2	-	-	1,2	-	1	60
CTTGAGGCCTTTCTTACCCAGAAGCAGAAGGTGGGAGAACTGAAGGATGACGACTTTGAG	CTTGAGGCCTTTCTTACCCAGAAGCAGAAGGTGGGAGAACTGAAGGATGACGACTTTGAG	var55	60	0	0	2	-	-	61,62	-	61	60
TGAGGCCTTTCTTACCCAGAAGCAGAAGGTGGGAGAACTGAAGGATGACGACTTTGAGAA	TGAGGCCTTTCTTACCCAGAAGCAGAAGGTGGGAGAACTGAAGGATGACGACTTTGAGAA	var59	60	0	0	2	-	-	1,2	-	1	60
CTTGAGGCCTTTCTTACCCAGAAGCAGAAGGTGGGAGAACTGAAGGATGACGACTTTG	CTTGAGGCCTTTCTTACCCAGAAGCAGAAGGTGGGAGAACTGAAGGATGACGACTTTG	var62	58	0	0	4	-	-	59,60,61,62	-	59	58
CTTGAGGCCTTTCTTACCCAGAAGCAGAAGGTGGGAGAACTGAAGGATGACGACTTTGAGA	CTTGAGGCCTTTCTTACCCAGAAGCAGAAGGTGGGAGAACTGAAGGATGACGACTTTGAGA	var7	61	0	0	1	-	-	62	-	62	61
TTGAGGCCTTTCTTACCCAGAAGCAGAAGGTGGGAGAACTGAAGGATGACGACTTTGAGAA	TTGAGGCCTTTCTTACCCAGAAGCAGAAGGTGGGAGAACTGAAGGATGACGACTTTGAGAA	var72	61	0	0	1	-	-	1	-	1	61
CTTGAGGCCTTTCTTACCCAGAAGCAGAAGGTGGGAGAACTGAAGGATGACGACTTTG	CTTGAGGCCTTTCTTACCCAGAAGCAGAAGGTGGGAGAACTGAAGGATGACGACTTTG	var79	58	0	0	4	-	-	59,60,61,62	-	59	58
CTTGAGGCCTTTCTTACCCAGAAGCAGAAGGTGGGAGAACTGAAGGATGACGACTTTGA	CTTGAGGCCTTTCTTACCCAGAAGCAGAAGGTGGGAGAACTGAAGGATGACGACTTTGA	var8	59	0	0	3	-	-	60,61,62	-	60	59
CTTGAGGCCTTTCTTACCCAGAAGCAGAAGGTGGGAGAACTGAAGGATGACGAACTTTGAGA	CTTGAGGCCTTTCTTACCCAGAAGCAGAAGGTGGGAGAACTGAAGGATGACG-ACTTTGAGA	var109	52A-9	0	1	0	-	53	-	53		62
CTTGAGGCCTTTCTTACCCAGAAGCAGAAGGTGGGAGAACTG-AGGATGACGACTTTGAGAA	CTTGAGGCCTTTCTTACCCAGAAGCAGAAGGTGGGAGAACTGAAGGATGACGACTTTGAGAA	var126	42-A19	0	0	1	-	-	43		43	62
CTTGAGGCCTTTCTTACCCAGAAGCAGAAGGT-GGAGAACTGAAGGATGACGACTTTGAGAA	CTTGAGGCCTTTCTTACCCAGAAGCAGAAGGTGGGAGAACTGAAGGATGACGACTTTGAGAA	var134	32-G29	0	0	1	-	-	33		33	62
CTTGAGGCCTTTCTTACC-AGAAGCAGAAGGTGGGAGAACTGAAGGATGACGACTTTGAGAA	CTTGAGGCCTTTCTTACCCAGAAGCAGAAGGTGGGAGAACTGAAGGATGACGACTTTGAGAA	var142	18-C43	0	0	1	-	-	19		19	62
CTTGAGGCCTTTCTTACCCAGAAGCAGAAGGTGGGAGAACTGAAGGATGACGACTTT-AGAA	CTTGAGGCCTTTCTTACCCAGAAGCAGAAGGTGGGAGAACTGAAGGATGACGACTTTGAGAA	var182	57-G4	0	0	1	-	-	58		58	62
CTTGAGGCCTTTCTTACCCAGAAGCAGA-GGTGGGAGAACTGAAGGATGACGACTTTGAGAA	CTTGAGGCCTTTCTTACCCAGAAGCAGAAGGTGGGAGAACTGAAGGATGACGACTTTGAGAA	var2	28-A33	0	0	1	-	-	29		29	62
CTTGAGGCCTTTCT-ACCCAGAAGCAGAAGGTGGGAGAACTGAAGGATGACGACTTTGAGAA	CTTGAGGCCTTTCTTACCCAGAAGCAGAAGGTGGGAGAACTGAAGGATGACGACTTTGAGAA	var201	14-T47	0	0	1	-	-	15		15	62
CTTGAGGCCTTTCTTACCCAGAAGCAGAAGGTGGGAGAACTGAAGGATGACGA-TTTGAGAA	CTTGAGGCCTTTCTTACCCAGAAGCAGAAGGTGGGAGAACTGAAGGATGACGACTTTGAGAA	var208	53-C8	0	0	1	-	-	54		54	62
CTTGAGGCCTTTCTTACCCAGAAGCAGAAGGTGGGAGAACTGAAGGATGACGACTTTTGAGA	CTTGAGGCCTTTCTTACCCAGAAGCAGAAGGTGGGAGAACTGAAGGATGACGAC-TTTGAGA	var217	54T-7	0	1	0	-	55	-	55		62
CTTGAGGCCTTTCTTACCCAGAAGCAGAAGGTGGGAGAACTGAAGGATGACGACCTTTGAGA	CTTGAGGCCTTTCTTACCCAGAAGCAGAAGGTGGGAGAACTGAAGGATGACGA-CTTTGAGA	var237	53C-8	0	1	0	-	54	-	54		62
CTTGAGGCCTTTCTTACCCAGAAGCAGAAGGTGGGAGAACTGAAGGATGACGAC-TTGAGAA	CTTGAGGCCTTTCTTACCCAGAAGCAGAAGGTGGGAGAACTGAAGGATGACGACTTTGAGAA	var36	54-T7	0	0	1	-	-	55		55	62
CTTGAGGCCTT-CTTACCCAGAAGCAGAAGGTGGGAGAACTGAAGGATGACGACTTTGAGAA	CTTGAGGCCTTTCTTACCCAGAAGCAGAAGGTGGGAGAACTGAAGGATGACGACTTTGAGAA	var77	11-T50	0	0	1	-	-	12		12	62
CTTGAGGC-TTTCTTACCCAGAAGCAGAAGGTGGGAGAACTGAAGGATGACGACTTTGAGAA	CTTGAGGCCTTTCTTACCCAGAAGCAGAAGGTGGGAGAACTGAAGGATGACGACTTTGAGAA	var95	8-C53	0	0	1	-	-	9		9	62
CTTGAGGCCTTTCTTACCCCGGAGCAGAAGGTGGGAGAACTGAAGGATGACGACTTTGAGAA	CTTGAGGCCTTTCTTACCCAGAAGCAGAAGGTGGGAGAACTGAAGGATGACGACTTTGAGAA	var100	19CA1GA40	2	0	0	20,22	-	-			62
CTTGAGGCCTTTCTTACCCAGCAGCAGCAGGTGGGAGAACTGAAGGATGACGACTTTGAGAA	CTTGAGGCCTTTCTTACCCAGAAGCAGAAGGTGGGAGAACTGAAGGATGACGACTTTGAGAA	var101	21CA5CA34	2	0	0	22,28	-	-			62
CTTGAGGCCTTTCTTACACAGAAGCAGAAGGTGGGAGAACTGAAGGATGACGAATTTGAGAA	CTTGAGGCCTTTCTTACCCAGAAGCAGAAGGTGGGAGAACTGAAGGATGACGACTTTGAGAA	var102	17AC35AC8	2	0	0	18,54	-	-			62
CTTGAGGCCTTTCTTACCCAGCAGCAGAAGGTGGGAGCACTGAAGGATGACGACTTTGAGAA	CTTGAGGCCTTTCTTACCCAGAAGCAGAAGGTGGGAGAACTGAAGGATGACGACTTTGAGAA	var105	21CA15CA24	2	0	0	22,38	-	-			62
CTTGAGGCCTTTCTTACCCAGACGCAGCAGGTGGGAGAACTGAAGGATGACGACTTTGAGAA	CTTGAGGCCTTTCTTACCCAGAAGCAGAAGGTGGGAGAACTGAAGGATGACGACTTTGAGAA	var112	22CA4CA34	2	0	0	23,28	-	-			62
CTTGAGGCCTTTCTTACCCCGAAGCAGAAGGTGGGAGAACTGAAGGATGACGCCTTTGAGAA	CTTGAGGCCTTTCTTACCCAGAAGCAGAAGGTGGGAGAACTGAAGGATGACGACTTTGAGAA	var113	19CA32CA9	2	0	0	20,53	-	-			62
CTTGAGGCCTTTCTTACCCCGAAGCAGAAGGAGGGAGAACTGAAGGATGACGACTTTGAGAA	CTTGAGGCCTTTCTTACCCAGAAGCAGAAGGTGGGAGAACTGAAGGATGACGACTTTGAGAA	var114	19CA11AT30	2	0	0	20,32	-	-			62
CTTGTGGCCTTTCTTACCCCGAAGCAGAAGGTGGGAGAACTGAAGGATGACGACTTTGAGAA	CTTGAGGCCTTTCTTACCCAGAAGCAGAAGGTGGGAGAACTGAAGGATGACGACTTTGAGAA	var115	4TA14CA42	2	0	0	5,20	-	-			62
CTTGAGGCCTTTCTTACAAAGAAGCAGAAGGTGGGAGAACTGAAGGATGACGACTTTGAGAA	CTTGAGGCCTTTCTTACCCAGAAGCAGAAGGTGGGAGAACTGAAGGATGACGACTTTGAGAA	var117	17ACAC43	2	0	0	18,19	-	-			62
CTTGAGGCCTTTCTTACCCCGAAGCAGAAGGTGGGAGAACTGCAGGATGACGACTTTGAGAA	CTTGAGGCCTTTCTTACCCAGAAGCAGAAGGTGGGAGAACTGAAGGATGACGACTTTGAGAA	var118	19CA22CA19	2	0	0	20,43	-	-			62
CTTGAGGCCTTTCCTACCCCGAAGCAGAAGGTGGGAGAACTGAAGGATGACGACTTTGAGAA	CTTGAGGCCTTTCTTACCCAGAAGCAGAAGGTGGGAGAACTGAAGGATGACGACTTTGAGAA	var119	13CT5CA42	2	0	0	14,20	-	-			62
CTTGAGGCCTTTCTTACACAGAAGCAGAAGGTGGGAGAACTGAAGGATGAAGACTTTGAGAA	CTTGAGGCCTTTCTTACCCAGAAGCAGAAGGTGGGAGAACTGAAGGATGACGACTTTGAGAA	var121	17AC32AC11	2	0	0	18,51	-	-			62
CTTGAGGCCTTTCTTACCCAGCCGCAGAAGGTGGGAGAACTGAAGGATGACGACTTTGAGAA	CTTGAGGCCTTTCTTACCCAGAAGCAGAAGGTGGGAGAACTGAAGGATGACGACTTTGAGAA	var122	21CACA39	2	0	0	22,23	-	-			62
CTTGAGGCCTTTCTTACCCAGAAGCAGCAGGTGGGAGAACTGACGGATGACGACTTTGAGAA	CTTGAGGCCTTTCTTACCCAGAAGCAGAAGGTGGGAGAACTGAAGGATGACGACTTTGAGAA	var123	27CA15CA18	2	0	0	28,44	-	-			62
CTTGAGGCCTTTCTTACCCAGAAGCAGAAGGTTGGAGAACTGAAGGATTACGACTTTGAGAA	CTTGAGGCCTTTCTTACCCAGAAGCAGAAGGTGGGAGAACTGAAGGATGACGACTTTGAGAA	var125	32TG15TG13	2	0	0	33,49	-	-			62
CTTGAGGCCTTTCTTACCCAGAAGCAGCAGGTGGGAGACCTGAAGGATGACGACTTTGAGAA	CTTGAGGCCTTTCTTACCCAGAAGCAGAAGGTGGGAGAACTGAAGGATGACGACTTTGAGAA	var127	27CA10CA23	2	0	0	28,39	-	-			62
CTTGCGGCCTTTCTTACCCAGCAGCAGAAGGTGGGAGAACTGAAGGATGACGACTTTGAGAA	CTTGAGGCCTTTCTTACCCAGAAGCAGAAGGTGGGAGAACTGAAGGATGACGACTTTGAGAA	var128	4CA16CA40	2	0	0	5,22	-	-			62
CTTGAGGCCTTTCTTACCCAGAGGCAGAAGGTGGGAGAACTAAAGGATGACGACTTTGAGAA	CTTGAGGCCTTTCTTACCCAGAAGCAGAAGGTGGGAGAACTGAAGGATGACGACTTTGAGAA	var165	22GA18AG20	2	0	0	23,42	-	-			62
CTTGAGGCCTTTCTTACCCAGAAACAGAAGGTGGGAGAACTAAAGGATGACGACTTTGAGAA	CTTGAGGCCTTTCTTACCCAGAAGCAGAAGGTGGGAGAACTGAAGGATGACGACTTTGAGAA	var181	23AG17AG20	2	0	0	24,42	-	-			62
CTTGAGGCCTTTCTTACCCAGAGACAGAAGGTGGGAGAACTGAAGGATGACGACTTTGAGAA	CTTGAGGCCTTTCTTACCCAGAAGCAGAAGGTGGGAGAACTGAAGGATGACGACTTTGAGAA	var187	22GAAG38	2	0	0	23,24	-	-			62
CTTGAGGCCTTTCTTACCCAGAGGTAGAAGGTGGGAGAACTGAAGGATGACGACTTTGAGAA	CTTGAGGCCTTTCTTACCCAGAAGCAGAAGGTGGGAGAACTGAAGGATGACGACTTTGAGAA	var194	22GA1TC37	2	0	0	23,25	-	-			62
CTTGAGGCCTTTCTTACACAGAAGCAGAAGGAGGGAGAACTGAAGGATGACGACTTTGAGAA	CTTGAGGCCTTTCTTACCCAGAAGCAGAAGGTGGGAGAACTGAAGGATGACGACTTTGAGAA	var239	17AC13AT30	2	0	0	18,32	-	-			62
CTTGAGGCCTTTCTTACCCAGAAGTAGAAGGTGGGAGAACTAAAGGATGACGACTTTGAGAA	CTTGAGGCCTTTCTTACCCAGAAGCAGAAGGTGGGAGAACTGAAGGATGACGACTTTGAGAA	var53	24TC16AG20	2	0	0	25,42	-	-			62
CTTGAGGCCTTTCTTAACCCGAAGCAGAAGGTGGGAGAACTGAAGGATGACGACTTTGAGAA	CTTGAGGCCTTTCTTACCCAGAAGCAGAAGGTGGGAGAACTGAAGGATGACGACTTTGAGAA	var54	16AC2CA42	2	0	0	17,20	-	-			62
CTTGAGGCCTTTCTTACCCCGAAGCCGAAGGTGGGAGAACTGAAGGATGACGACTTTGAGAA	CTTGAGGCCTTTCTTACCCAGAAGCAGAAGGTGGGAGAACTGAAGGATGACGACTTTGAGAA	var57	19CA5CA36	2	0	0	20,26	-	-			62
CTTGAGGCCTTTCTTACACCGAAGCAGAAGGTGGGAGAACTGAAGGATGACGACTTTGAGAA	CTTGAGGCCTTTCTTACCCAGAAGCAGAAGGTGGGAGAACTGAAGGATGACGACTTTGAGAA	var68	17AC1CA42	2	0	0	18,20	-	-			62
CTTGAGGCCTTTCTTACCCCGAAGCAGAAGGTGGGAGAACTGAAGGATGAAGACTTTGAGAA	CTTGAGGCCTTTCTTACCCAGAAGCAGAAGGTGGGAGAACTGAAGGATGACGACTTTGAGAA	var76	19CA30AC11	2	0	0	20,51	-	-			62
CTTGAGGCCTTTCTTACCCCGAAGCAGAAGGTGGGAGAAATGAAGGATGACGACTTTGAGAA	CTTGAGGCCTTTCTTACCCAGAAGCAGAAGGTGGGAGAACTGAAGGATGACGACTTTGAGAA	var80	19CA19AC22	2	0	0	20,40	-	-			62
CTTGAGGCCTTTCTTAACCAGAAGCAGAAGGTGGGAGAAATGAAGGATGACGACTTTGAGAA	CTTGAGGCCTTTCTTACCCAGAAGCAGAAGGTGGGAGAACTGAAGGATGACGACTTTGAGAA	var87	16AC22AC22	2	0	0	17,40	-	-			62
CTTGAGGCCTTTCTTAACCAGAAGCCGAAGGTGGGAGAACTGAAGGATGACGACTTTGAGAA	CTTGAGGCCTTTCTTACCCAGAAGCAGAAGGTGGGAGAACTGAAGGATGACGACTTTGAGAA	var88	16AC8CA36	2	0	0	17,26	-	-			62
CTTGAGGCCTTTCTTACCCCGAAGCAGAAGGTGGGCGAACTGAAGGATGACGACTTTGAGAA	CTTGAGGCCTTTCTTACCCAGAAGCAGAAGGTGGGAGAACTGAAGGATGACGACTTTGAGAA	var89	19CA15CA26	2	0	0	20,36	-	-			62
CTTGAGGCCTTTCTTACCCCGAAGCAGCAGGTGGGAGAACTGAAGGATGACGACTTTGAGAA	CTTGAGGCCTTTCTTACCCAGAAGCAGAAGGTGGGAGAACTGAAGGATGACGACTTTGAGAA	var90	19CA7CA34	2	0	0	20,28	-	-			62
CTTGAGGCCTTTCTTACCCAGCAGCCGAAGGTGGGAGAACTGAAGGATGACGACTTTGAGAA	CTTGAGGCCTTTCTTACCCAGAAGCAGAAGGTGGGAGAACTGAAGGATGACGACTTTGAGAA	var91	21CA3CA36	2	0	0	22,26	-	-			62
CTTGAGGCCTTTCTTACCCAGAAATAGAAGGTGGGAGAACTGAAGGATGACGACTTTGAGAA	CTTGAGGCCTTTCTTACCCAGAAGCAGAAGGTGGGAGAACTGAAGGATGACGACTTTGAGAA	var93	23AGTC37	2	0	0	24,25	-	-			62
CTTGAGGCCTTTCTTACCCAGAAGCCGAAGGTGGGAGCACTGAAGGATGACGACTTTGAGAA	CTTGAGGCCTTTCTTACCCAGAAGCAGAAGGTGGGAGAACTGAAGGATGACGACTTTGAGAA	var94	25CA11CA24	2	0	0	26,38	-	-			62
CTTGAGGCCTTTCTTAACCAGAAGCAGAAGGTGGGAGAACTGAAGGATGAAGACTTTGAGAA	CTTGAGGCCTTTCTTACCCAGAAGCAGAAGGTGGGAGAACTGAAGGATGACGACTTTGAGAA	var97	16AC33AC11	2	0	0	17,51	-	-			62
CTTGAGGCCTTTCTTAAACAGAAGCAGAAGGTGGGAGAACTGAAGGATGACGACTTTGAGAA	CTTGAGGCCTTTCTTACCCAGAAGCAGAAGGTGGGAGAACTGAAGGATGACGACTTTGAGAA	var98	16ACAC44	2	0	0	17,18	-	-			62
CTTGAGGCCTTTCTTAACCAGAAGCAGAAGGTGGGAGAACTGAAGGATGACGAATTTGAGAA	CTTGAGGCCTTTCTTACCCAGAAGCAGAAGGTGGGAGAACTGAAGGATGACGACTTTGAGAA	var99	16AC36AC8	2	0	0	17,54	-	-			62
CTTGAGGCCTTTCTTACCCAGAGACAGAAGGTGGGAGAACTAAAGGATGACGACTTTGAGAA	CTTGAGGCCTTTCTTACCCAGAAGCAGAAGGTGGGAGAACTGAAGGATGACGACTTTGAGAA	var154	22GAAG17AG20	3	0	0	23,24,42	-	-			62
CTTGAGGCCTTTCTTACCCAGAGATAGAAGGTGGGAGAACTGAAGGATGACGACTTTGAGAA	CTTGAGGCCTTTCTTACCCAGAAGCAGAAGGTGGGAGAACTGAAGGATGACGACTTTGAGAA	var170	22GAAGTC37	3	0	0	23,24,25	-	-			62
CTTGAGGCCTTTCTTACCCAGAGGTAGAAGGTGGGAGAACTAAAGGATGACGACTTTGAGAA	CTTGAGGCCTTTCTTACCCAGAAGCAGAAGGTGGGAGAACTGAAGGATGACGACTTTGAGAA	var185	22GA1TC16AG20	3	0	0	23,25,42	-	-			62
CTTGAGGCCTTTCTTACCCAGAAATAGAAGGTGGGAGAACTAAAGGATGACGACTTTGAGAA	CTTGAGGCCTTTCTTACCCAGAAGCAGAAGGTGGGAGAACTGAAGGATGACGACTTTGAGAA	var247	23AGTC16AG20	3	0	0	24,25,42	-	-			62
CTTGAGGCCTTTCTTACCCAGAGATAGAAGGTGGGAGAACTAAAGGATGACGACTTTGA	CTTGAGGCCTTTCTTACCCAGAAGCAGAAGGTGGGAGAACTGAAGGATGACGACTTTGA	var108	22GAAGTC16AG17	4	0	0	23,24,25,42	-	-			59
CTTGAGGCCTTTCTTACCCAGAGATAGAAGGTGGGAGAACTAAAGGATGACGACTTTGAGAA	CTTGAGGCCTTTCTTACCCAGAAGCAGAAGGTGGGAGAACTGAAGGATGACGACTTTGAGAA	var3	22GAAGTC16AG20	4	0	0	23,24,25,42	-	-			62
CTTGAGGCCTTTCTTACCCAGAGATAGAAGGTGGGAGAACTAAAGGATGACGACTTTGAGA	CTTGAGGCCTTTCTTACCCAGAAGCAGAAGGTGGGAGAACTGAAGGATGACGACTTTGAGA	var92	22GAAGTC16AG19	4	0	0	23,24,25,42	-	-			61
CTTGAGGCCTTTCTTACCCAGGGATAGAAGGTGGGAGAACTAAAGGATGACGACTTTGAGAA	CTTGAGGCCTTTCTTACCCAGAAGCAGAAGGTGGGAGAACTGAAGGATGACGACTTTGAGAA	var111	21GAGAAGTC16AG20	5	0	0	22,23,24,25,42	-	-			62
CTTGGGGCCTTTCTTACCCAGAGATAGAAGGTGGGAGAACTAAAGGATGACGACTTTGAGAA	CTTGAGGCCTTTCTTACCCAGAAGCAGAAGGTGGGAGAACTGAAGGATGACGACTTTGAGAA	var116	4GA17GAAGTC16AG20	5	0	0	5,23,24,25,42	-	-			62
CTTGAGGCCTTTCTTACCCAGAGATAGAAGGTGGGAGAACTAAGGGATGACGACTTTGAGAA	CTTGAGGCCTTTCTTACCCAGAAGCAGAAGGTGGGAGAACTGAAGGATGACGACTTTGAGAA	var120	22GAAGTC16AG1GA18	5	0	0	23,24,25,42,44	-	-			62
CTTGAGGCCTTTCTTACCCCGAGATAGAAGGTGGGAGAACTAAAGGATGACGACTTTGAGAA	CTTGAGGCCTTTCTTACCCAGAAGCAGAAGGTGGGAGAACTGAAGGATGACGACTTTGAGAA	var96	19CA2GAAGTC16AG20	5	0	0	20,23,24,25,42	-	-			62
CTTGAGGCCTTTCTTACCCAGAAGCAGGAGGTGGGAGAACTGAAGGATGACGACTTTGAGAA	CTTGAGGCCTTTCTTACCCAGAAGCAGAAGGTGGGAGAACTGAAGGATGACGACTTTGAGAA	var10	27GA34	1	0	0	28	-	-			62
CTTGAGGCCTTTCTTACCCAGAAGGAGAAGGTGGGAGAACTGAAGGATGACGACTTTGAGAA	CTTGAGGCCTTTCTTACCCAGAAGCAGAAGGTGGGAGAACTGAAGGATGACGACTTTGAGAA	var104	24GC37	1	0	0	25	-	-			62
CTTGAGGCCTTTCTTACCCAGCAGCAGAAGGTGGGAGAACTGAAGGATGACGACTTTGAG	CTTGAGGCCTTTCTTACCCAGAAGCAGAAGGTGGGAGAACTGAAGGATGACGACTTTGAG	var106	21CA38	1	0	0	22	-	-			60
CTTGAGGCCTTTCTTACCCAGAAGCAGAAGGTGGGAGAACTAAAGGATGACGACTTTGAGA	CTTGAGGCCTTTCTTACCCAGAAGCAGAAGGTGGGAGAACTGAAGGATGACGACTTTGAGA	var107	41AG19	1	0	0	42	-	-			61
CTTGAGGCCCTTCTTACCCAGAAGCAGAAGGTGGGAGAACTGAAGGATGACGACTTTGAGAA	CTTGAGGCCTTTCTTACCCAGAAGCAGAAGGTGGGAGAACTGAAGGATGACGACTTTGAGAA	var11	9CT52	1	0	0	10	-	-			62
CTTGAGGCCTTTCTTACCCAGAAGCAGAAGGTGGGAGAACTCAAGGATGACGACTTTGAGAA	CTTGAGGCCTTTCTTACCCAGAAGCAGAAGGTGGGAGAACTGAAGGATGACGACTTTGAGAA	var110	41CG20	1	0	0	42	-	-			62
CTTGAGGCCTTTCTTCCCCAGAAGCAGAAGGTGGGAGAACTGAAGGATGACGACTTTGAGAA	CTTGAGGCCTTTCTTACCCAGAAGCAGAAGGTGGGAGAACTGAAGGATGACGACTTTGAGAA	var12	15CA46	1	0	0	16	-	-			62
CTTGAGGCCTTTCTTACCCAGACGCAGAAGGTGGGAGAACTGAAGGATGACGACTTTGAG	CTTGAGGCCTTTCTTACCCAGAAGCAGAAGGTGGGAGAACTGAAGGATGACGACTTTGAG	var124	22CA37	1	0	0	23	-	-			60
CTTGAGGCCTTTCTTACCTAGAAGCAGAAGGTGGGAGAACTGAAGGATGACGACTTTGAGAA	CTTGAGGCCTTTCTTACCCAGAAGCAGAAGGTGGGAGAACTGAAGGATGACGACTTTGAGAA	var129	18TC43	1	0	0	19	-	-			62
CTTGAGGCCTTCCTTACCCAGAAGCAGAAGGTGGGAGAACTGAAGGATGACGACTTTGAGAA	CTTGAGGCCTTTCTTACCCAGAAGCAGAAGGTGGGAGAACTGAAGGATGACGACTTTGAGAA	var13	11CT50	1	0	0	12	-	-			62
CTTGAGGCCTTTCTTACCCAGAAGCAGTAGGTGGGAGAACTGAAGGATGACGACTTTGAGAA	CTTGAGGCCTTTCTTACCCAGAAGCAGAAGGTGGGAGAACTGAAGGATGACGACTTTGAGAA	var130	27TA34	1	0	0	28	-	-			62
CTTGAGACCTTTCTTACCCAGAAGCAGAAGGTGGGAGAACTGAAGGATGACGACTTTGAGAA	CTTGAGGCCTTTCTTACCCAGAAGCAGAAGGTGGGAGAACTGAAGGATGACGACTTTGAGAA	var131	6AG55	1	0	0	7	-	-			62
CTTGAGGCCTTTCTTACCCAGAAGCAGAAGGTGGGAGAACTGACGGATGACGACTTTGAGAA	CTTGAGGCCTTTCTTACCCAGAAGCAGAAGGTGGGAGAACTGAAGGATGACGACTTTGAGAA	var132	43CA18	1	0	0	44	-	-			62
CTTGAAGCCTTTCTTACCCAGAAGCAGAAGGTGGGAGAACTGAAGGATGACGACTTTGAGAA	CTTGAGGCCTTTCTTACCCAGAAGCAGAAGGTGGGAGAACTGAAGGATGACGACTTTGAGAA	var133	5AG56	1	0	0	6	-	-			62
CTTGAGGCCTTTCTTACCCAGAAGCAGAAGGTGGGAAAACTGAAGGATGACGACTTTGAGAA	CTTGAGGCCTTTCTTACCCAGAAGCAGAAGGTGGGAGAACTGAAGGATGACGACTTTGAGAA	var135	36AG25	1	0	0	37	-	-			62
CTTGAGGCCTTTCTTACCCAGAAGCAGAAGGTGGGTGAACTGAAGGATGACGACTTTGAGAA	CTTGAGGCCTTTCTTACCCAGAAGCAGAAGGTGGGAGAACTGAAGGATGACGACTTTGAGAA	var136	35TA26	1	0	0	36	-	-			62
CTTGAGGCCTTTCTTACCCAGAAGCAGAAGGTGGGAGAACTGAAGGATGACGACTTTAAGAA	CTTGAGGCCTTTCTTACCCAGAAGCAGAAGGTGGGAGAACTGAAGGATGACGACTTTGAGAA	var137	57AG4	1	0	0	58	-	-			62
CTTGAGGCCTTTCTTACCCAGAAGCAGAAGGTGGGAGAACTGAAGGATGACGACCTTGAGAA	CTTGAGGCCTTTCTTACCCAGAAGCAGAAGGTGGGAGAACTGAAGGATGACGACTTTGAGAA	var138	54CT7	1	0	0	55	-	-			62
CTTGAGGCCTTTCTTACACAGAAGCAGAAGGTGGGAGAACTGAAGGATGACGACTTTGAGAA	CTTGAGGCCTTTCTTACCCAGAAGCAGAAGGTGGGAGAACTGAAGGATGACGACTTTGAGAA	var139	17AC44	1	0	0	18	-	-			62
CTTGAGGCCTTTCTTACCCAGAAGCAGCAGGTGGGAGAACTGAAGGATGACGACTTTGAGAA	CTTGAGGCCTTTCTTACCCAGAAGCAGAAGGTGGGAGAACTGAAGGATGACGACTTTGAGAA	var14	27CA34	1	0	0	28	-	-			62
CTTGAGGCCTTTCTTACCCAGACGCAGAAGGTGGGAGAACTGAAGGATGACGACTTTGAGAA	CTTGAGGCCTTTCTTACCCAGAAGCAGAAGGTGGGAGAACTGAAGGATGACGACTTTGAGAA	var140	22CA39	1	0	0	23	-	-			62
CTTGAGGCCTTTCTTACCCAGAAGCAGAAGGTGGGCGAACTGAAGGATGACGACTTTGAGAA	CTTGAGGCCTTTCTTACCCAGAAGCAGAAGGTGGGAGAACTGAAGGATGACGACTTTGAGAA	var141	35CA26	1	0	0	36	-	-			62
CTTAAGGCCTTTCTTACCCAGAAGCAGAAGGTGGGAGAACTGAAGGATGACGACTTTGAGAA	CTTGAGGCCTTTCTTACCCAGAAGCAGAAGGTGGGAGAACTGAAGGATGACGACTTTGAGAA	var143	3AG58	1	0	0	4	-	-			62
CTTGAGGCCTTTCTTACCCCGAAGCAGAAGGTGGGAGAACTGAAGGATGACGACTTTGAGAA	CTTGAGGCCTTTCTTACCCAGAAGCAGAAGGTGGGAGAACTGAAGGATGACGACTTTGAGAA	var144	19CA42	1	0	0	20	-	-			62
CTTGAGGCCTTTCTTACCCAGAAGCAGAAGGTGGGAGAACTGAAAGATGACGACTTTGAGAA	CTTGAGGCCTTTCTTACCCAGAAGCAGAAGGTGGGAGAACTGAAGGATGACGACTTTGAGAA	var145	44AG17	1	0	0	45	-	-			62
CTTGAGCCCTTTCTTACCCAGAAGCAGAAGGTGGGAGAACTGAAGGATGACGACTTTGAGAA	CTTGAGGCCTTTCTTACCCAGAAGCAGAAGGTGGGAGAACTGAAGGATGACGACTTTGAGAA	var146	6CG55	1	0	0	7	-	-			62
CTTGAGGCCTTTCTTACCCAGAAGCAGAAGGTGGGAGAATTGAAGGATGACGACTTTGAGAA	CTTGAGGCCTTTCTTACCCAGAAGCAGAAGGTGGGAGAACTGAAGGATGACGACTTTGAGAA	var147	39TC22	1	0	0	40	-	-			62
CTTGAGGCCTTTCTTATCCAGAAGCAGAAGGTGGGAGAACTGAAGGATGACGACTTTGAGAA	CTTGAGGCCTTTCTTACCCAGAAGCAGAAGGTGGGAGAACTGAAGGATGACGACTTTGAGAA	var148	16TC45	1	0	0	17	-	-			62
CTTGAGGCCTTTCTTACCCAGAAGCAGAAGGTGGGAGAACTGTAGGATGACGACTTTGAGAA	CTTGAGGCCTTTCTTACCCAGAAGCAGAAGGTGGGAGAACTGAAGGATGACGACTTTGAGAA	var149	42TA19	1	0	0	43	-	-			62
CTTGAGGCCTTTCTTACCCAGAAGCAGAAGGTGGGAGAACTGAAGGATGGCGACTTTGAGAA	CTTGAGGCCTTTCTTACCCAGAAGCAGAAGGTGGGAGAACTGAAGGATGACGACTTTGAGAA	var15	49GA12	1	0	0	50	-	-			62
CTTGAGGCCTTTCTTACCCTGAAGCAGAAGGTGGGAGAACTGAAGGATGACGACTTTGAGAA	CTTGAGGCCTTTCTTACCCAGAAGCAGAAGGTGGGAGAACTGAAGGATGACGACTTTGAGAA	var150	19TA42	1	0	0	20	-	-			62
CTTGAGGCCTTTCTTACCCAGAAGCAGAAGGTGGGAGAACTGAAGGATGAAGACTTTGAGAA	CTTGAGGCCTTTCTTACCCAGAAGCAGAAGGTGGGAGAACTGAAGGATGACGACTTTGAGAA	var151	50AC11	1	0	0	51	-	-			62
CTTGCGGCCTTTCTTACCCAGAAGCAGAAGGTGGGAGAACTGAAGGATGACGACTTTGAGAA	CTTGAGGCCTTTCTTACCCAGAAGCAGAAGGTGGGAGAACTGAAGGATGACGACTTTGAGAA	var152	4CA57	1	0	0	5	-	-			62
CTTGAGGCCTTTCTTACCCAAAAGCAGAAGGTGGGAGAACTGAAGGATGACGACTTTGAGAA	CTTGAGGCCTTTCTTACCCAGAAGCAGAAGGTGGGAGAACTGAAGGATGACGACTTTGAGAA	var153	20AG41	1	0	0	21	-	-			62
CTTGAGGCCTTTCTTACCCAGAAGCAGAAGGTGGGAGAACTGAAGGATGTCGACTTTGAGAA	CTTGAGGCCTTTCTTACCCAGAAGCAGAAGGTGGGAGAACTGAAGGATGACGACTTTGAGAA	var155	49TA12	1	0	0	50	-	-			62
CTTGAGGCCATTCTTACCCAGAAGCAGAAGGTGGGAGAACTGAAGGATGACGACTTTGAGAA	CTTGAGGCCTTTCTTACCCAGAAGCAGAAGGTGGGAGAACTGAAGGATGACGACTTTGAGAA	var158	9AT52	1	0	0	10	-	-			62
CTTGAGGCCTTTCTTACCCAGAAGCTGAAGGTGGGAGAACTGAAGGATGACGACTTTGAGAA	CTTGAGGCCTTTCTTACCCAGAAGCAGAAGGTGGGAGAACTGAAGGATGACGACTTTGAGAA	var159	25TA36	1	0	0	26	-	-			62
CTTGAGGCCTTTCTTACCCAGAAGCAGAAGGCGGGAGAACTGAAGGATGACGACTTTGAGAA	CTTGAGGCCTTTCTTACCCAGAAGCAGAAGGTGGGAGAACTGAAGGATGACGACTTTGAGAA	var16	31CT30	1	0	0	32	-	-			62
CTTGAGGCCTTTCTTACCCAGAAGCAGAAGGTGGGAGAACTGAAGGATGACGACATTGAGAA	CTTGAGGCCTTTCTTACCCAGAAGCAGAAGGTGGGAGAACTGAAGGATGACGACTTTGAGAA	var160	54AT7	1	0	0	55	-	-			62
CTTGAGGCCTTTCTTACCCAGAAGCAGAAGGTGGGAGAACAGAAGGATGACGACTTTGAGAA	CTTGAGGCCTTTCTTACCCAGAAGCAGAAGGTGGGAGAACTGAAGGATGACGACTTTGAGAA	var161	40AT21	1	0	0	41	-	-			62
CTTGAGGCCTTTCTTACCCAGAAGCCGAAGGTGGGAGAACTGAAGGATGACGACTTTGAGAA	CTTGAGGCCTTTCTTACCCAGAAGCAGAAGGTGGGAGAACTGAAGGATGACGACTTTGAGAA	var162	25CA36	1	0	0	26	-	-			62
CTTGAGGCCTTTCTTACCCAGAAGCAGAAGGTGGGAGAACTGAAGGATGACGACTATGAGAA	CTTGAGGCCTTTCTTACCCAGAAGCAGAAGGTGGGAGAACTGAAGGATGACGACTTTGAGAA	var163	55AT6	1	0	0	56	-	-			62
CTTGAGGCCTTTCTTACCCAGAAGCAGAAGGTGGGAGACCTGAAGGATGACGACTTTGAGAA	CTTGAGGCCTTTCTTACCCAGAAGCAGAAGGTGGGAGAACTGAAGGATGACGACTTTGAGAA	var166	38CA23	1	0	0	39	-	-			62
CTTGAGGCCTTTCTTACCCAGTAGCAGAAGGTGGGAGAACTGAAGGATGACGACTTTGAGAA	CTTGAGGCCTTTCTTACCCAGAAGCAGAAGGTGGGAGAACTGAAGGATGACGACTTTGAGAA	var167	21TA40	1	0	0	22	-	-			62
CTTGAGGCCTTTCATACCCAGAAGCAGAAGGTGGGAGAACTGAAGGATGACGACTTTGAGAA	CTTGAGGCCTTTCTTACCCAGAAGCAGAAGGTGGGAGAACTGAAGGATGACGACTTTGAGAA	var169	13AT48	1	0	0	14	-	-			62
CTTGAGGCCTTTCTTACCCAGAAGCAGAAGGTGGGAGAACTGAGGGATGACGACTTTGAGAA	CTTGAGGCCTTTCTTACCCAGAAGCAGAAGGTGGGAGAACTGAAGGATGACGACTTTGAGAA	var17	43GA18	1	0	0	44	-	-			62
CTTGAGGCCTTTCTTACCCAGAAGCAGAAGGTGGGAGTACTGAAGGATGACGACTTTGAGAA	CTTGAGGCCTTTCTTACCCAGAAGCAGAAGGTGGGAGAACTGAAGGATGACGACTTTGAGAA	var171	37TA24	1	0	0	38	-	-			62
CTTGAGGCATTTCTTACCCAGAAGCAGAAGGTGGGAGAACTGAAGGATGACGACTTTGAGAA	CTTGAGGCCTTTCTTACCCAGAAGCAGAAGGTGGGAGAACTGAAGGATGACGACTTTGAGAA	var172	8AC53	1	0	0	9	-	-			62
CTTGAGGCCTTTCTTACCCAGAAGCAGAAGGTGGGAGAACTGAAGGATGACGACTTTGGGAA	CTTGAGGCCTTTCTTACCCAGAAGCAGAAGGTGGGAGAACTGAAGGATGACGACTTTGAGAA	var174	58GA3	1	0	0	59	-	-			62
CTTGAGGCCTTTCTTACCCAGAAGCAGAAGGTGTGAGAACTGAAGGATGACGACTTTGAGAA	CTTGAGGCCTTTCTTACCCAGAAGCAGAAGGTGGGAGAACTGAAGGATGACGACTTTGAGAA	var175	33TG28	1	0	0	34	-	-			62
CTTGAGGCCTTTCTTACCCAGAAGCAGAAGGTGGGAGAACTGAAGGCTGACGACTTTGAGAA	CTTGAGGCCTTTCTTACCCAGAAGCAGAAGGTGGGAGAACTGAAGGATGACGACTTTGAGAA	var176	46CA15	1	0	0	47	-	-			62
CTTGAGGCCTTTTTTACCCAGAAGCAGAAGGTGGGAGAACTGAAGGATGACGACTTTGAGAA	CTTGAGGCCTTTCTTACCCAGAAGCAGAAGGTGGGAGAACTGAAGGATGACGACTTTGAGAA	var177	12TC49	1	0	0	13	-	-			62
CTTGAGGCCTTTCTTACCCAGAAGCAGAAGGTGGGAGAACTGAAGGAAGACGACTTTGAGAA	CTTGAGGCCTTTCTTACCCAGAAGCAGAAGGTGGGAGAACTGAAGGATGACGACTTTGAGAA	var178	47AT14	1	0	0	48	-	-			62
CTTGAGGCCTTTCTTACCCAGAAGCAGAAGGTGGGAGAACTGAAGGATGACGACTTTGATAA	CTTGAGGCCTTTCTTACCCAGAAGCAGAAGGTGGGAGAACTGAAGGATGACGACTTTGAGAA	var179	59TG2	1	0	0	60	-	-			62
CTTGAGGCCTTTCTTACCCAGAAGCAGAAGGTGGGAGGACTGAAGGATGACGACTTTGAGAA	CTTGAGGCCTTTCTTACCCAGAAGCAGAAGGTGGGAGAACTGAAGGATGACGACTTTGAGAA	var18	37GA24	1	0	0	38	-	-			62
CTTGAGGCCTTTCTTACCCAGAAGCAGAAGGTGGGAGAACTGAAGGATGACGACTTAGAGAA	CTTGAGGCCTTTCTTACCCAGAAGCAGAAGGTGGGAGAACTGAAGGATGACGACTTTGAGAA	var180	56AT5	1	0	0	57	-	-			62
CTTGAGGCCTTTCTTACCCAGAAGCAGAAGGTGGGAGAACTGAAGGTTGACGACTTTGAGAA	CTTGAGGCCTTTCTTACCCAGAAGCAGAAGGTGGGAGAACTGAAGGATGACGACTTTGAGAA	var183	46TA15	1	0	0	47	-	-			62
CTTGAGGCCTTTCTTACCCAGAAGCAGAAGGTGGGAGAACTGAAGGATGACGGCTTTGAGAA	CTTGAGGCCTTTCTTACCCAGAAGCAGAAGGTGGGAGAACTGAAGGATGACGACTTTGAGAA	var184	52GA9	1	0	0	53	-	-			62
CTTGAGGCCTTACTTACCCAGAAGCAGAAGGTGGGAGAACTGAAGGATGACGACTTTGAGAA	CTTGAGGCCTTTCTTACCCAGAAGCAGAAGGTGGGAGAACTGAAGGATGACGACTTTGAGAA	var186	11AT50	1	0	0	12	-	-			62
CTTGAGGCCTTTCTTACCCAGAAGCAGAAGGTGGGAGAACTGAAGGATTACGACTTTGAGAA	CTTGAGGCCTTTCTTACCCAGAAGCAGAAGGTGGGAGAACTGAAGGATGACGACTTTGAGAA	var188	48TG13	1	0	0	49	-	-			62
CTTGAGGCCTTTCTTACCCAGAAGCAGAAGGTGGGAGAACTGATGGATGACGACTTTGAGAA	CTTGAGGCCTTTCTTACCCAGAAGCAGAAGGTGGGAGAACTGAAGGATGACGACTTTGAGAA	var189	43TA18	1	0	0	44	-	-			62
CTTGAGGCCTTTCTTACCAAGAAGCAGAAGGTGGGAGAACTGAAGGATGACGACTTTGAGAA	CTTGAGGCCTTTCTTACCCAGAAGCAGAAGGTGGGAGAACTGAAGGATGACGACTTTGAGAA	var19	18AC43	1	0	0	19	-	-			62
CTTGAGGCCTTTCTTACCCAGAAGCAGAAGGTGGGAGAACTGAAGGATGACGACTCTGAGAA	CTTGAGGCCTTTCTTACCCAGAAGCAGAAGGTGGGAGAACTGAAGGATGACGACTTTGAGAA	var190	55CT6	1	0	0	56	-	-			62
CTTGAGGCCTTTCTTACCCAGAAGCAGAAGGTGGGAGAACTGAAGGATGACGACGTTGAGAA	CTTGAGGCCTTTCTTACCCAGAAGCAGAAGGTGGGAGAACTGAAGGATGACGACTTTGAGAA	var191	54GT7	1	0	0	55	-	-			62
CTTGAGGCCTTTCTTACCCAGAAGCAGAAGGTTGGAGAACTGAAGGATGACGACTTTGAGAA	CTTGAGGCCTTTCTTACCCAGAAGCAGAAGGTGGGAGAACTGAAGGATGACGACTTTGAGAA	var192	32TG29	1	0	0	33	-	-			62
CTTGAGGCCTTTCTTACCCAGAAGCAGAAGGTGGGAGAACTGAATGATGACGACTTTGAGAA	CTTGAGGCCTTTCTTACCCAGAAGCAGAAGGTGGGAGAACTGAAGGATGACGACTTTGAGAA	var193	44TG17	1	0	0	45	-	-			62
CTTGAGGCCTTTCTTACCCAGAAGCAGAAGGTGGGAGAACTGAAGGATGACGACTTTTAGAA	CTTGAGGCCTTTCTTACCCAGAAGCAGAAGGTGGGAGAACTGAAGGATGACGACTTTGAGAA	var195	57TG4	1	0	0	58	-	-			62
CTAGAGGCCTTTCTTACCCAGAAGCAGAAGGTGGGAGAACTGAAGGATGACGACTTTGAGAA	CTTGAGGCCTTTCTTACCCAGAAGCAGAAGGTGGGAGAACTGAAGGATGACGACTTTGAGAA	var197	2AT59	1	0	0	3	-	-			62
CTTGAGGCCTTTCTAACCCAGAAGCAGAAGGTGGGAGAACTGAAGGATGACGACTTTGAGAA	CTTGAGGCCTTTCTTACCCAGAAGCAGAAGGTGGGAGAACTGAAGGATGACGACTTTGAGAA	var198	14AT47	1	0	0	15	-	-			62
CTTGAGGCCTTTCTTACCCAGAAGCAGAAGGTGGGAGAACTGAAGGATGACGACTTTGCGAA	CTTGAGGCCTTTCTTACCCAGAAGCAGAAGGTGGGAGAACTGAAGGATGACGACTTTGAGAA	var199	58CA3	1	0	0	59	-	-			62
CTTGAGGCCTTTCTTACCCAGAAGCGGAAGGTGGGAGAACTGAAGGATGACGACTTTGAGAA	CTTGAGGCCTTTCTTACCCAGAAGCAGAAGGTGGGAGAACTGAAGGATGACGACTTTGAGAA	var20	25GA36	1	0	0	26	-	-			62
CTTGAGGCCTTTCTTACCCAGAAGCAGAAGGTGGGAGAACTGAAGGATGACGACTGTGAGAA	CTTGAGGCCTTTCTTACCCAGAAGCAGAAGGTGGGAGAACTGAAGGATGACGACTTTGAGAA	var200	55GT6	1	0	0	56	-	-			62
CTTGAGGCCTTTCTTACCCAGAAGCAGAAGGTGGTAGAACTGAAGGATGACGACTTTGAGAA	CTTGAGGCCTTTCTTACCCAGAAGCAGAAGGTGGGAGAACTGAAGGATGACGACTTTGAGAA	var202	34TG27	1	0	0	35	-	-			62
CTTGAGGCCTTTCTTACCCAGATGCAGAAGGTGGGAGAACTGAAGGATGACGACTTTGAGAA	CTTGAGGCCTTTCTTACCCAGAAGCAGAAGGTGGGAGAACTGAAGGATGACGACTTTGAGAA	var203	22TA39	1	0	0	23	-	-			62
CTTGAGGCCTTTCTTACCCAGAAGCAGAAGGTGGGAGAACTGAACGATGACGACTTTGAGAA	CTTGAGGCCTTTCTTACCCAGAAGCAGAAGGTGGGAGAACTGAAGGATGACGACTTTGAGAA	var204	44CG17	1	0	0	45	-	-			62
CTTGAGGCCTTTCTTACCCAGAAGCAGAAGGTGGGAGAACTGAAGGATGACTACTTTGAGAA	CTTGAGGCCTTTCTTACCCAGAAGCAGAAGGTGGGAGAACTGAAGGATGACGACTTTGAGAA	var205	51TG10	1	0	0	52	-	-			62
CTTGATGCCTTTCTTACCCAGAAGCAGAAGGTGGGAGAACTGAAGGATGACGACTTTGAGAA	CTTGAGGCCTTTCTTACCCAGAAGCAGAAGGTGGGAGAACTGAAGGATGACGACTTTGAGAA	var206	5TG56	1	0	0	6	-	-			62
CTTGAGGCCTTTCTTACCCAGAAGCAGAAGGTGGGAGAACTGAAGTATGACGACTTTGAGAA	CTTGAGGCCTTTCTTACCCAGAAGCAGAAGGTGGGAGAACTGAAGGATGACGACTTTGAGAA	var207	45TG16	1	0	0	46	-	-			62
CTTTAGGCCTTTCTTACCCAGAAGCAGAAGGTGGGAGAACTGAAGGATGACGACTTTGAGAA	CTTGAGGCCTTTCTTACCCAGAAGCAGAAGGTGGGAGAACTGAAGGATGACGACTTTGAGAA	var209	3TG58	1	0	0	4	-	-			62
CTTGAGGCCTTTCTTACCCAGAAGCAGAAGGTGGGGGAACTGAAGGATGACGACTTTGAGAA	CTTGAGGCCTTTCTTACCCAGAAGCAGAAGGTGGGAGAACTGAAGGATGACGACTTTGAGAA	var21	35GA26	1	0	0	36	-	-			62
CTTGAGGACTTTCTTACCCAGAAGCAGAAGGTGGGAGAACTGAAGGATGACGACTTTGAGAA	CTTGAGGCCTTTCTTACCCAGAAGCAGAAGGTGGGAGAACTGAAGGATGACGACTTTGAGAA	var211	7AC54	1	0	0	8	-	-			62
CTTGAGGCCTTTCTTACCCAGAAGCAGAAGGTGGGAGAACGGAAGGATGACGACTTTGAGAA	CTTGAGGCCTTTCTTACCCAGAAGCAGAAGGTGGGAGAACTGAAGGATGACGACTTTGAGAA	var212	40GT21	1	0	0	41	-	-			62
CTTGAGGCCTTTATTACCCAGAAGCAGAAGGTGGGAGAACTGAAGGATGACGACTTTGAGAA	CTTGAGGCCTTTCTTACCCAGAAGCAGAAGGTGGGAGAACTGAAGGATGACGACTTTGAGAA	var213	12AC49	1	0	0	13	-	-			62
CTTGAGGCCTTTCTTACCCAGAAGCATAAGGTGGGAGAACTGAAGGATGACGACTTTGAGAA	CTTGAGGCCTTTCTTACCCAGAAGCAGAAGGTGGGAGAACTGAAGGATGACGACTTTGAGAA	var214	26TG35	1	0	0	27	-	-			62
CTTGAGGCCTTTCTTACCCAGAAGCAGAAGGTGCGAGAACTGAAGGATGACGACTTTGAGAA	CTTGAGGCCTTTCTTACCCAGAAGCAGAAGGTGGGAGAACTGAAGGATGACGACTTTGAGAA	var215	33CG28	1	0	0	34	-	-			62
CTTGAGGCCTTTCTTACCCAGAATCAGAAGGTGGGAGAACTGAAGGATGACGACTTTGAGAA	CTTGAGGCCTTTCTTACCCAGAAGCAGAAGGTGGGAGAACTGAAGGATGACGACTTTGAGAA	var216	23TG38	1	0	0	24	-	-			62
CTTGAGGCCTTTCTTACCCAGAAGCAGAAGGTGGGAGAACTGAAGGATGACGACTTTGACAA	CTTGAGGCCTTTCTTACCCAGAAGCAGAAGGTGGGAGAACTGAAGGATGACGACTTTGAGAA	var218	59CG2	1	0	0	60	-	-			62
CTTGAGGCCTTTCTTACCCAGAAGCAGAAGGTGGGAGAACTGAAGGAGGACGACTTTGAGAA	CTTGAGGCCTTTCTTACCCAGAAGCAGAAGGTGGGAGAACTGAAGGATGACGACTTTGAGAA	var219	47GT14	1	0	0	48	-	-			62
CTTGGGGCCTTTCTTACCCAGAAGCAGAAGGTGGGAGAACTGAAGGATGACGACTTTGAGAA	CTTGAGGCCTTTCTTACCCAGAAGCAGAAGGTGGGAGAACTGAAGGATGACGACTTTGAGAA	var22	4GA57	1	0	0	5	-	-			62
CTGGAGGCCTTTCTTACCCAGAAGCAGAAGGTGGGAGAACTGAAGGATGACGACTTTGAGAA	CTTGAGGCCTTTCTTACCCAGAAGCAGAAGGTGGGAGAACTGAAGGATGACGACTTTGAGAA	var220	2GT59	1	0	0	3	-	-			62
CTTGAGGCCTTTCTTACCCAGAAGCAGAATGTGGGAGAACTGAAGGATGACGACTTTGAGAA	CTTGAGGCCTTTCTTACCCAGAAGCAGAAGGTGGGAGAACTGAAGGATGACGACTTTGAGAA	var221	29TG32	1	0	0	30	-	-			62
CTTGAGGCCTATCTTACCCAGAAGCAGAAGGTGGGAGAACTGAAGGATGACGACTTTGAGAA	CTTGAGGCCTTTCTTACCCAGAAGCAGAAGGTGGGAGAACTGAAGGATGACGACTTTGAGAA	var222	10AT51	1	0	0	11	-	-			62
CTTGAGGCCTTTCTTACCCAGAAGCAGAAGGTGGGAGAACTGAAGGATGACGACTTCGAGAA	CTTGAGGCCTTTCTTACCCAGAAGCAGAAGGTGGGAGAACTGAAGGATGACGACTTTGAGAA	var223	56CT5	1	0	0	57	-	-			62
CTTGAGGCCTTTCTTTCCCAGAAGCAGAAGGTGGGAGAACTGAAGGATGACGACTTTGAGAA	CTTGAGGCCTTTCTTACCCAGAAGCAGAAGGTGGGAGAACTGAAGGATGACGACTTTGAGAA	var224	15TA46	1	0	0	16	-	-			62
CTTGAGGCCTTTCTGACCCAGAAGCAGAAGGTGGGAGAACTGAAGGATGACGACTTTGAGAA	CTTGAGGCCTTTCTTACCCAGAAGCAGAAGGTGGGAGAACTGAAGGATGACGACTTTGAGAA	var225	14GT47	1	0	0	15	-	-			62
CTTGAGGCCTTTCTTAGCCAGAAGCAGAAGGTGGGAGAACTGAAGGATGACGACTTTGAGAA	CTTGAGGCCTTTCTTACCCAGAAGCAGAAGGTGGGAGAACTGAAGGATGACGACTTTGAGAA	var226	16GC45	1	0	0	17	-	-			62
CTTGAGGCCTTTCTTACCCAGAAGCAGAAGGTGGGAGAACTTAAGGATGACGACTTTGAGAA	CTTGAGGCCTTTCTTACCCAGAAGCAGAAGGTGGGAGAACTGAAGGATGACGACTTTGAGAA	var227	41TG20	1	0	0	42	-	-			62
CTTGAGGCCTTTCGTACCCAGAAGCAGAAGGTGGGAGAACTGAAGGATGACGACTTTGAGAA	CTTGAGGCCTTTCTTACCCAGAAGCAGAAGGTGGGAGAACTGAAGGATGACGACTTTGAGAA	var228	13GT48	1	0	0	14	-	-			62
CTTGAGGCCTTTCTTACCCAGAAGCAGAAGGTGGGAGAACTGAAGCATGACGACTTTGAGAA	CTTGAGGCCTTTCTTACCCAGAAGCAGAAGGTGGGAGAACTGAAGGATGACGACTTTGAGAA	var229	45CG16	1	0	0	46	-	-			62
CTTGAGGCCTTTCTTACCCAGAAGCAGAAGGTGGGAGAACTGAAGGACGACGACTTTGAGAA	CTTGAGGCCTTTCTTACCCAGAAGCAGAAGGTGGGAGAACTGAAGGATGACGACTTTGAGAA	var23	47CT14	1	0	0	48	-	-			62
CTTGAGGCCTTTCTTACCCAGAAGCAGAAGGTCGGAGAACTGAAGGATGACGACTTTGAGAA	CTTGAGGCCTTTCTTACCCAGAAGCAGAAGGTGGGAGAACTGAAGGATGACGACTTTGAGAA	var230	32CG29	1	0	0	33	-	-			62
CTTGAGGCCTTTCTTACCCAGAAGCAGAAGCTGGGAGAACTGAAGGATGACGACTTTGAGAA	CTTGAGGCCTTTCTTACCCAGAAGCAGAAGGTGGGAGAACTGAAGGATGACGACTTTGAGAA	var231	30CG31	1	0	0	31	-	-			62
CTTGAGGCCTTTCTTACCCAGAAGCAGAAGGTGGGAGAACTGAAGGATGACGTCTTTGAGAA	CTTGAGGCCTTTCTTACCCAGAAGCAGAAGGTGGGAGAACTGAAGGATGACGACTTTGAGAA	var232	52TA9	1	0	0	53	-	-			62
CTTGAGGCCTTTCTTACCCAGAAGCAGAAGGTGGGAGAACTGAAGGATGACCACTTTGAGAA	CTTGAGGCCTTTCTTACCCAGAAGCAGAAGGTGGGAGAACTGAAGGATGACGACTTTGAGAA	var233	51CG10	1	0	0	52	-	-			62
CTTGAGGCCTTTCTTACCCAGAAGCAGAAGGTGGGAGAACTGAAGGATGACGACTTTCAGAA	CTTGAGGCCTTTCTTACCCAGAAGCAGAAGGTGGGAGAACTGAAGGATGACGACTTTGAGAA	var234	57CG4	1	0	0	58	-	-			62
CTTGAGGCCGTTCTTACCCAGAAGCAGAAGGTGGGAGAACTGAAGGATGACGACTTTGAGAA	CTTGAGGCCTTTCTTACCCAGAAGCAGAAGGTGGGAGAACTGAAGGATGACGACTTTGAGAA	var235	9GT52	1	0	0	10	-	-			62
CTTGAGGCCTTGCTTACCCAGAAGCAGAAGGTGGGAGAACTGAAGGATGACGACTTTGAGAA	CTTGAGGCCTTTCTTACCCAGAAGCAGAAGGTGGGAGAACTGAAGGATGACGACTTTGAGAA	var236	11GT50	1	0	0	12	-	-			62
CTTGAGGCCTTTCTTACCCAGAAGCAGAAGGTGGGATAACTGAAGGATGACGACTTTGAGAA	CTTGAGGCCTTTCTTACCCAGAAGCAGAAGGTGGGAGAACTGAAGGATGACGACTTTGAGAA	var238	36TG25	1	0	0	37	-	-			62
CTTGAGGCCTCTCTTACCCAGAAGCAGAAGGTGGGAGAACTGAAGGATGACGACTTTGAGAA	CTTGAGGCCTTTCTTACCCAGAAGCAGAAGGTGGGAGAACTGAAGGATGACGACTTTGAGAA	var24	10CT51	1	0	0	11	-	-			62
CTTGAGGCCTTTCTTACCCAGAAGCAGAAGGTGGGAGATCTGAAGGATGACGACTTTGAGAA	CTTGAGGCCTTTCTTACCCAGAAGCAGAAGGTGGGAGAACTGAAGGATGACGACTTTGAGAA	var240	38TA23	1	0	0	39	-	-			62
CTTGAGGCCTTTCTTACCCAGAAGCAGAAGGTGGGACAACTGAAGGATGACGACTTTGAGAA	CTTGAGGCCTTTCTTACCCAGAAGCAGAAGGTGGGAGAACTGAAGGATGACGACTTTGAGAA	var243	36CG25	1	0	0	37	-	-			62
CTTGAGTCCTTTCTTACCCAGAAGCAGAAGGTGGGAGAACTGAAGGATGACGACTTTGAGAA	CTTGAGGCCTTTCTTACCCAGAAGCAGAAGGTGGGAGAACTGAAGGATGACGACTTTGAGAA	var244	6TG55	1	0	0	7	-	-			62
CTTGAGGCCTTTCTTACCCAGAAGCAGAAGGTGGCAGAACTGAAGGATGACGACTTTGAGAA	CTTGAGGCCTTTCTTACCCAGAAGCAGAAGGTGGGAGAACTGAAGGATGACGACTTTGAGAA	var245	34CG27	1	0	0	35	-	-			62
CTTGAGGCCTTTCTTACCCAGAAGCAGAAGGTGGGAGAACTGAAGGATGACGACTTGGAGAA	CTTGAGGCCTTTCTTACCCAGAAGCAGAAGGTGGGAGAACTGAAGGATGACGACTTTGAGAA	var246	56GT5	1	0	0	57	-	-			62
CTTGAGGCCTTTCTTACCCAGAAGCAGAACGTGGGAGAACTGAAGGATGACGACTTTGAGAA	CTTGAGGCCTTTCTTACCCAGAAGCAGAAGGTGGGAGAACTGAAGGATGACGACTTTGAGAA	var248	29CG32	1	0	0	30	-	-			62
CTTGAGGCCTTTCTTACGCAGAAGCAGAAGGTGGGAGAACTGAAGGATGACGACTTTGAGAA	CTTGAGGCCTTTCTTACCCAGAAGCAGAAGGTGGGAGAACTGAAGGATGACGACTTTGAGAA	var249	17GC44	1	0	0	18	-	-			62
CTCGAGGCCTTTCTTACCCAGAAGCAGAAGGTGGGAGAACTGAAGGATGACGACTTTGAGAA	CTTGAGGCCTTTCTTACCCAGAAGCAGAAGGTGGGAGAACTGAAGGATGACGACTTTGAGAA	var25	2CT59	1	0	0	3	-	-			62
CTTGAGGCCTTTCTTACCCAGAAGCAGAAGGTGGGAGAACTGAAGGATGACGACTTTGTGAA	CTTGAGGCCTTTCTTACCCAGAAGCAGAAGGTGGGAGAACTGAAGGATGACGACTTTGAGAA	var250	58TA3	1	0	0	59	-	-			62
CTTGAGGCCTTTCTTACCCAGAAGCAGAAGGTGGGAGAACCGAAGGATGACGACTTTGAGAA	CTTGAGGCCTTTCTTACCCAGAAGCAGAAGGTGGGAGAACTGAAGGATGACGACTTTGAGAA	var27	40CT21	1	0	0	41	-	-			62
CTTGAGGCCTTTCTTACCCAGAAGAAGAAGGTGGGAGAACTGAAGGATGACGACTTTGAGAA	CTTGAGGCCTTTCTTACCCAGAAGCAGAAGGTGGGAGAACTGAAGGATGACGACTTTGAGAA	var28	24AC37	1	0	0	25	-	-			62
CTTGAGGCCTTTCTTACCCAGAAGCAGAAGGTGGGAGAACTGGAGGATGACGACTTTGAGAA	CTTGAGGCCTTTCTTACCCAGAAGCAGAAGGTGGGAGAACTGAAGGATGACGACTTTGAGAA	var29	42GA19	1	0	0	43	-	-			62
CTTGAGGCCTTTCCTACCCAGAAGCAGAAGGTGGGAGAACTGAAGGATGACGACTTTGAGAA	CTTGAGGCCTTTCTTACCCAGAAGCAGAAGGTGGGAGAACTGAAGGATGACGACTTTGAGAA	var30	13CT48	1	0	0	14	-	-			62
CTTGAGGCCTTTCTTACCCAGAAGCAGAAGGTGGGAGAGCTGAAGGATGACGACTTTGAGAA	CTTGAGGCCTTTCTTACCCAGAAGCAGAAGGTGGGAGAACTGAAGGATGACGACTTTGAGAA	var31	38GA23	1	0	0	39	-	-			62
CTTGAGGCCTTTCTTACCCAGAAGCAGAAGGTGGGAGAACTGAAGGATGACGCCTTTGAGAA	CTTGAGGCCTTTCTTACCCAGAAGCAGAAGGTGGGAGAACTGAAGGATGACGACTTTGAGAA	var32	52CA9	1	0	0	53	-	-			62
CTTGAGGCCTTTCTTACCCAGGAGCAGAAGGTGGGAGAACTGAAGGATGACGACTTTGAGAA	CTTGAGGCCTTTCTTACCCAGAAGCAGAAGGTGGGAGAACTGAAGGATGACGACTTTGAGAA	var33	21GA40	1	0	0	22	-	-			62
CTTGAGGCCTTTCTTACCCAGAAGCAGAAGGTGGGAGAACTGAAGGATGACGAATTTGAGAA	CTTGAGGCCTTTCTTACCCAGAAGCAGAAGGTGGGAGAACTGAAGGATGACGACTTTGAGAA	var34	53AC8	1	0	0	54	-	-			62
CTTGAGGCCTTTCTTACCCAGAAGCAGAAGGTGGGAGAACTGAAGGGTGACGACTTTGAGAA	CTTGAGGCCTTTCTTACCCAGAAGCAGAAGGTGGGAGAACTGAAGGATGACGACTTTGAGAA	var35	46GA15	1	0	0	47	-	-			62
CTTGAGGCCTTTCTTACCCGGAAGCAGAAGGTGGGAGAACTGAAGGATGACGACTTTGAGAA	CTTGAGGCCTTTCTTACCCAGAAGCAGAAGGTGGGAGAACTGAAGGATGACGACTTTGAGAA	var37	19GA42	1	0	0	20	-	-			62
CTTGAGGCCTTTCTTACCCAGAAGCAGAAGGGGGGAGAACTGAAGGATGACGACTTTGAGAA	CTTGAGGCCTTTCTTACCCAGAAGCAGAAGGTGGGAGAACTGAAGGATGACGACTTTGAGAA	var38	31GT30	1	0	0	32	-	-			62
CTTGAGGCCTTTCTTACCCAGAAGCAGATGGTGGGAGAACTGAAGGATGACGACTTTGAGAA	CTTGAGGCCTTTCTTACCCAGAAGCAGAAGGTGGGAGAACTGAAGGATGACGACTTTGAGAA	var39	28TA33	1	0	0	29	-	-			62
CTTGAGGCCTTTCTTACCCAGAAGCAGAAGGAGGGAGAACTGAAGGATGACGACTTTGAGAA	CTTGAGGCCTTTCTTACCCAGAAGCAGAAGGTGGGAGAACTGAAGGATGACGACTTTGAGAA	var4	31AT30	1	0	0	32	-	-			62
CTTGAGGCCTTTCTCACCCAGAAGCAGAAGGTGGGAGAACTGAAGGATGACGACTTTGAGAA	CTTGAGGCCTTTCTTACCCAGAAGCAGAAGGTGGGAGAACTGAAGGATGACGACTTTGAGAA	var40	14CT47	1	0	0	15	-	-			62
CTTGAGGCCTTTCTTACCCAGAAGCAGAAGGTGGGAGAACTGAAGGATGACAACTTTGAGAA	CTTGAGGCCTTTCTTACCCAGAAGCAGAAGGTGGGAGAACTGAAGGATGACGACTTTGAGAA	var41	51AG10	1	0	0	52	-	-			62
CTTGAGGCCTTTCTTACCCAGCAGCAGAAGGTGGGAGAACTGAAGGATGACGACTTTGAGAA	CTTGAGGCCTTTCTTACCCAGAAGCAGAAGGTGGGAGAACTGAAGGATGACGACTTTGAGAA	var42	21CA40	1	0	0	22	-	-			62
CTTGAGGCCTTTCTTGCCCAGAAGCAGAAGGTGGGAGAACTGAAGGATGACGACTTTGAGAA	CTTGAGGCCTTTCTTACCCAGAAGCAGAAGGTGGGAGAACTGAAGGATGACGACTTTGAGAA	var43	15GA46	1	0	0	16	-	-			62
CTTGAGGCCTTTCTTACCCAGAAGCAGACGGTGGGAGAACTGAAGGATGACGACTTTGAGAA	CTTGAGGCCTTTCTTACCCAGAAGCAGAAGGTGGGAGAACTGAAGGATGACGACTTTGAGAA	var44	28CA33	1	0	0	29	-	-			62
CTTGAGGCCTTTCTTAACCAGAAGCAGAAGGTGGGAGAACTGAAGGATGACGACTTTGAGAA	CTTGAGGCCTTTCTTACCCAGAAGCAGAAGGTGGGAGAACTGAAGGATGACGACTTTGAGAA	var45	16AC45	1	0	0	17	-	-			62
CTTGAGGCCTTTCTTACCCAGAAGCAGAAAGTGGGAGAACTGAAGGATGACGACTTTGAGAA	CTTGAGGCCTTTCTTACCCAGAAGCAGAAGGTGGGAGAACTGAAGGATGACGACTTTGAGAA	var46	29AG32	1	0	0	30	-	-			62
CTTGAGGCCTTTCTTACCCAGAAGCAGAAGGTGAGAGAACTGAAGGATGACGACTTTGAGAA	CTTGAGGCCTTTCTTACCCAGAAGCAGAAGGTGGGAGAACTGAAGGATGACGACTTTGAGAA	var47	33AG28	1	0	0	34	-	-			62
CTTGAGGCCTTTCTTACCCAGAAACAGAAGGTGGGAGAACTGAAGGATGACGACTTTGAGAA	CTTGAGGCCTTTCTTACCCAGAAGCAGAAGGTGGGAGAACTGAAGGATGACGACTTTGAGAA	var48	23AG38	1	0	0	24	-	-			62
CTTGTGGCCTTTCTTACCCAGAAGCAGAAGGTGGGAGAACTGAAGGATGACGACTTTGAGAA	CTTGAGGCCTTTCTTACCCAGAAGCAGAAGGTGGGAGAACTGAAGGATGACGACTTTGAGAA	var49	4TA57	1	0	0	5	-	-			62
CTTGAGGCCTTTCTTACCCAGAAGCAGAAGGTGGGAGAACTAAAGGATGACGACTTTGAGAA	CTTGAGGCCTTTCTTACCCAGAAGCAGAAGGTGGGAGAACTGAAGGATGACGACTTTGAGAA	var5	41AG20	1	0	0	42	-	-			62
CTTGAGGCCTTTCTTACCCAGAAGTAGAAGGTGGGAGAACTGAAGGATGACGACTTTGAGAA	CTTGAGGCCTTTCTTACCCAGAAGCAGAAGGTGGGAGAACTGAAGGATGACGACTTTGAGAA	var50	24TC37	1	0	0	25	-	-			62
CTTGAGGTCTTTCTTACCCAGAAGCAGAAGGTGGGAGAACTGAAGGATGACGACTTTGAGAA	CTTGAGGCCTTTCTTACCCAGAAGCAGAAGGTGGGAGAACTGAAGGATGACGACTTTGAGAA	var51	7TC54	1	0	0	8	-	-			62
CTTGAGGCCTTTCTTACCCAGAAGCAGAAGGTGGGAGAACTGAAGGATAACGACTTTGAGAA	CTTGAGGCCTTTCTTACCCAGAAGCAGAAGGTGGGAGAACTGAAGGATGACGACTTTGAGAA	var52	48AG13	1	0	0	49	-	-			62
CTTGAGGCCTTTCTTACCCAGAAGCAGAAGGTGGGAGAACTGAAGGATGACGATTTTGAGAA	CTTGAGGCCTTTCTTACCCAGAAGCAGAAGGTGGGAGAACTGAAGGATGACGACTTTGAGAA	var56	53TC8	1	0	0	54	-	-			62
CTTGAGGCCTTTCTTACCCAGAAGCAGAAGGTGGGAGAACTGAAGGATGACGACTTTGAAAA	CTTGAGGCCTTTCTTACCCAGAAGCAGAAGGTGGGAGAACTGAAGGATGACGACTTTGAGAA	var58	59AG2	1	0	0	60	-	-			62
CTTGAGGCCTTTCTTACCCAGAAGCAGAGGGTGGGAGAACTGAAGGATGACGACTTTGAGAA	CTTGAGGCCTTTCTTACCCAGAAGCAGAAGGTGGGAGAACTGAAGGATGACGACTTTGAGAA	var6	28GA33	1	0	0	29	-	-			62
CTTGAGGCCTTTCTTACCCAGAAGCAGAAGGTGGGAGAACTGAAGGATGCCGACTTTGAGAA	CTTGAGGCCTTTCTTACCCAGAAGCAGAAGGTGGGAGAACTGAAGGATGACGACTTTGAGAA	var60	49CA12	1	0	0	50	-	-			62
CTTGAGGCCTTTCTTACCCAGAAGCAGAAGGTAGGAGAACTGAAGGATGACGACTTTGAGAA	CTTGAGGCCTTTCTTACCCAGAAGCAGAAGGTGGGAGAACTGAAGGATGACGACTTTGAGAA	var61	32AG29	1	0	0	33	-	-			62
CTTCAGGCCTTTCTTACCCAGAAGCAGAAGGTGGGAGAACTGAAGGATGACGACTTTGAGAA	CTTGAGGCCTTTCTTACCCAGAAGCAGAAGGTGGGAGAACTGAAGGATGACGACTTTGAGAA	var63	3CG58	1	0	0	4	-	-			62
CTTGAGGCCTTTCTTACCCAGAAGCAGAAGTTGGGAGAACTGAAGGATGACGACTTTGAGAA	CTTGAGGCCTTTCTTACCCAGAAGCAGAAGGTGGGAGAACTGAAGGATGACGACTTTGAGAA	var64	30TG31	1	0	0	31	-	-			62
CTTGAGGCCTTTCTTACCCATAAGCAGAAGGTGGGAGAACTGAAGGATGACGACTTTGAGAA	CTTGAGGCCTTTCTTACCCAGAAGCAGAAGGTGGGAGAACTGAAGGATGACGACTTTGAGAA	var65	20TG41	1	0	0	21	-	-			62
CTTGAGGCCTTTCTTACCCAGAAGCAGAAGATGGGAGAACTGAAGGATGACGACTTTGAGAA	CTTGAGGCCTTTCTTACCCAGAAGCAGAAGGTGGGAGAACTGAAGGATGACGACTTTGAGAA	var66	30AG31	1	0	0	31	-	-			62
CTTGAGGCTTTTCTTACCCAGAAGCAGAAGGTGGGAGAACTGAAGGATGACGACTTTGAGAA	CTTGAGGCCTTTCTTACCCAGAAGCAGAAGGTGGGAGAACTGAAGGATGACGACTTTGAGAA	var67	8TC53	1	0	0	9	-	-			62
CTTGAGGCCTTTCTTACCCAGAAGCAGAAGGTGGGAGAACTGAAGGATGATGACTTTGAGAA	CTTGAGGCCTTTCTTACCCAGAAGCAGAAGGTGGGAGAACTGAAGGATGACGACTTTGAGAA	var69	50TC11	1	0	0	51	-	-			62
CTTGAGGCCTTTCTTACCCAGAAGCAAAAGGTGGGAGAACTGAAGGATGACGACTTTGAGAA	CTTGAGGCCTTTCTTACCCAGAAGCAGAAGGTGGGAGAACTGAAGGATGACGACTTTGAGAA	var70	26AG35	1	0	0	27	-	-			62
CTTGAGGCCTTTCTTACTCAGAAGCAGAAGGTGGGAGAACTGAAGGATGACGACTTTGAGAA	CTTGAGGCCTTTCTTACCCAGAAGCAGAAGGTGGGAGAACTGAAGGATGACGACTTTGAGAA	var71	17TC44	1	0	0	18	-	-			62
CTTGAGGCCTTTCTTACCCAGAAGCAGAAGGTGGGAGAACTGAAGAATGACGACTTTGAGAA	CTTGAGGCCTTTCTTACCCAGAAGCAGAAGGTGGGAGAACTGAAGGATGACGACTTTGAGAA	var73	45AG16	1	0	0	46	-	-			62
CTTGAGGCCTTTCTTACCCAGAAGCAGAAGGTGGGAGAACTGAAGGATCACGACTTTGAGAA	CTTGAGGCCTTTCTTACCCAGAAGCAGAAGGTGGGAGAACTGAAGGATGACGACTTTGAGAA	var74	48CG13	1	0	0	49	-	-			62
CTTGAGGCCTTTCTTACCCAGAAGCAGAAGGTGGAAGAACTGAAGGATGACGACTTTGAGAA	CTTGAGGCCTTTCTTACCCAGAAGCAGAAGGTGGGAGAACTGAAGGATGACGACTTTGAGAA	var75	34AG27	1	0	0	35	-	-			62
CTTGAGGCCTTTCTTACCCAGAAGCAGAAGGTGGGAGAACTGAAGGATGAGGACTTTGAGAA	CTTGAGGCCTTTCTTACCCAGAAGCAGAAGGTGGGAGAACTGAAGGATGACGACTTTGAGAA	var78	50GC11	1	0	0	51	-	-			62
CTTGAGGCCTTTCTTACCCAGAAGCAGAAGGTGGGAGAAATGAAGGATGACGACTTTGAGAA	CTTGAGGCCTTTCTTACCCAGAAGCAGAAGGTGGGAGAACTGAAGGATGACGACTTTGAGAA	var81	39AC22	1	0	0	40	-	-			62
CTTGAGGCCTTTCTTACCCAGAAGCAGAAGGTGGGAGAACTGCAGGATGACGACTTTGAGAA	CTTGAGGCCTTTCTTACCCAGAAGCAGAAGGTGGGAGAACTGAAGGATGACGACTTTGAGAA	var82	42CA19	1	0	0	43	-	-			62
CTTGAGGCCTTTCTTACCGAGAAGCAGAAGGTGGGAGAACTGAAGGATGACGACTTTGAGAA	CTTGAGGCCTTTCTTACCCAGAAGCAGAAGGTGGGAGAACTGAAGGATGACGACTTTGAGAA	var83	18GC43	1	0	0	19	-	-			62
CTTGAGGCCTGTCTTACCCAGAAGCAGAAGGTGGGAGAACTGAAGGATGACGACTTTGAGAA	CTTGAGGCCTTTCTTACCCAGAAGCAGAAGGTGGGAGAACTGAAGGATGACGACTTTGAGAA	var84	10GT51	1	0	0	11	-	-			62
CTTGAGGCCTTTCTTACCCAGAAGCAGAAGGTGGGAGCACTGAAGGATGACGACTTTGAGAA	CTTGAGGCCTTTCTTACCCAGAAGCAGAAGGTGGGAGAACTGAAGGATGACGACTTTGAGAA	var85	37CA24	1	0	0	38	-	-			62
CTTGAGGGCTTTCTTACCCAGAAGCAGAAGGTGGGAGAACTGAAGGATGACGACTTTGAGAA	CTTGAGGCCTTTCTTACCCAGAAGCAGAAGGTGGGAGAACTGAAGGATGACGACTTTGAGAA	var86	7GC54	1	0	0	8	-	-			62
CTTGAGGCCTTTCTTACCCAGAGGCAGAAGGTGGGAGAACTGAAGGATGACGACTTTGAGAA	CTTGAGGCCTTTCTTACCCAGAAGCAGAAGGTGGGAGAACTGAAGGATGACGACTTTGAGAA	var9	22GA39	1	0	0	23	-	-			62

## Sheet: MAP2K1
Query	Subject	QueryID	btop	Number of mismatches	Number of insertions	Number of deletions	Position of mismatches	Position of insertions	Position of deletions	First position of insertion	First position of deletion	Query Length
AACTGAAGGAT	AACTGAAGGAT	var597	11	0	0	37	-	-	1,2,3,4,5,6,7,8,9,10,11,12,13,14,15,16,17,18,19,20,21,22,23,24,25,26,27,28,29,30,31,32,33,34,35,36,37	-	1	11
AACTGAAGGATGACGACTTTGAGAA	AACTGAAGGATGACGACTTTGAGAA	var101	25	0	0	37	-	-	1,2,3,4,5,6,7,8,9,10,11,12,13,14,15,16,17,18,19,20,21,22,23,24,25,26,27,28,29,30,31,32,33,34,35,36,37	-	1	25
AACTGAAGGATGACGACTTTGAGAA	AACTGAAGGATGACGACTTTGAGAA	var1115	25	0	0	37	-	-	1,2,3,4,5,6,7,8,9,10,11,12,13,14,15,16,17,18,19,20,21,22,23,24,25,26,27,28,29,30,31,32,33,34,35,36,37	-	1	25
AACTGAAGGATGACGACTTTGAGAA	AACTGAAGGATGACGACTTTGAGAA	var1329	25	0	0	37	-	-	1,2,3,4,5,6,7,8,9,10,11,12,13,14,15,16,17,18,19,20,21,22,23,24,25,26,27,28,29,30,31,32,33,34,35,36,37	-	1	25
AACTGAAGGATGACGACTTTGAGAA	AACTGAAGGATGACGACTTTGAGAA	var191	25	0	0	37	-	-	1,2,3,4,5,6,7,8,9,10,11,12,13,14,15,16,17,18,19,20,21,22,23,24,25,26,27,28,29,30,31,32,33,34,35,36,37	-	1	25
AACTGAAGGATGACGACTTTGAGAA	AACTGAAGGATGACGACTTTGAGAA	var274	25	0	0	37	-	-	1,2,3,4,5,6,7,8,9,10,11,12,13,14,15,16,17,18,19,20,21,22,23,24,25,26,27,28,29,30,31,32,33,34,35,36,37	-	1	25
AACTGAAGGATGACGACTTTGAGAA	AACTGAAGGATGACGACTTTGAGAA	var312	25	0	0	37	-	-	1,2,3,4,5,6,7,8,9,10,11,12,13,14,15,16,17,18,19,20,21,22,23,24,25,26,27,28,29,30,31,32,33,34,35,36,37	-	1	25
AACTGAAGGATGACGACTTTGAGAA	AACTGAAGGATGACGACTTTGAGAA	var313	25	0	0	37	-	-	1,2,3,4,5,6,7,8,9,10,11,12,13,14,15,16,17,18,19,20,21,22,23,24,25,26,27,28,29,30,31,32,33,34,35,36,37	-	1	25
AACTGAAGGATGACGACTTTGAGAA	AACTGAAGGATGACGACTTTGAGAA	var354	25	0	0	37	-	-	1,2,3,4,5,6,7,8,9,10,11,12,13,14,15,16,17,18,19,20,21,22,23,24,25,26,27,28,29,30,31,32,33,34,35,36,37	-	1	25
AACTGAAGGATGACGACTTTGAGAA	AACTGAAGGATGACGACTTTGAGAA	var378	25	0	0	37	-	-	1,2,3,4,5,6,7,8,9,10,11,12,13,14,15,16,17,18,19,20,21,22,23,24,25,26,27,28,29,30,31,32,33,34,35,36,37	-	1	25
AACTGAAGGATGACGACTTTGAGAA	AACTGAAGGATGACGACTTTGAGAA	var648	25	0	0	37	-	-	1,2,3,4,5,6,7,8,9,10,11,12,13,14,15,16,17,18,19,20,21,22,23,24,25,26,27,28,29,30,31,32,33,34,35,36,37	-	1	25
AACTGAAGGATGACGACTTTGAGAA	AACTGAAGGATGACGACTTTGAGAA	var682	25	0	0	37	-	-	1,2,3,4,5,6,7,8,9,10,11,12,13,14,15,16,17,18,19,20,21,22,23,24,25,26,27,28,29,30,31,32,33,34,35,36,37	-	1	25
AACTGAAGGATGACGACTTTGAGAA	AACTGAAGGATGACGACTTTGAGAA	var743	25	0	0	37	-	-	1,2,3,4,5,6,7,8,9,10,11,12,13,14,15,16,17,18,19,20,21,22,23,24,25,26,27,28,29,30,31,32,33,34,35,36,37	-	1	25
AACTGAAGGATGACGACTTTGAGAA	AACTGAAGGATGACGACTTTGAGAA	var83	25	0	0	37	-	-	1,2,3,4,5,6,7,8,9,10,11,12,13,14,15,16,17,18,19,20,21,22,23,24,25,26,27,28,29,30,31,32,33,34,35,36,37	-	1	25
AAGAAAGGCCT	AAGAAAGGCCT	var1364	11	0	0	14	-	-	1,2,3,4,5,6,7,8,9,10,11,12,13,14	-	1	11
AAGAAAGGCCT	AAGAAAGGCCT	var842	11	0	0	14	-	-	1,2,3,4,5,6,7,8,9,10,11,12,13,14	-	1	11
AAGAAGAAGGTGGGAGAACTGAAGGATGACGACTTTGAGAA	AAGCAGAAGGTGGGAGAACTGAAGGATGACGACTTTGAGAA	var1328	3AC37	1	0	0	4	-	-			41
AAGGATGACGACTTTGAGAA	AAGGATGACGACTTTGAGAA	var1273	20	0	0	42	-	-	1,2,3,4,5,6,7,8,9,10,11,12,13,14,15,16,17,18,19,20,21,22,23,24,25,26,27,28,29,30,31,32,33,34,35,36,37,38,39,40,41,42	-	1	20
AAGGATGACGACTTTGAGAA	AAGGATGACGACTTTGAGAA	var1347	20	0	0	42	-	-	1,2,3,4,5,6,7,8,9,10,11,12,13,14,15,16,17,18,19,20,21,22,23,24,25,26,27,28,29,30,31,32,33,34,35,36,37,38,39,40,41,42	-	1	20
AAGGATGACGACTTTGAGAA	AAGGATGACGACTTTGAGAA	var1586	20	0	0	42	-	-	1,2,3,4,5,6,7,8,9,10,11,12,13,14,15,16,17,18,19,20,21,22,23,24,25,26,27,28,29,30,31,32,33,34,35,36,37,38,39,40,41,42	-	1	20
AAGGATGACGACTTTGAGAA	AAGGATGACGACTTTGAGAA	var243	20	0	0	42	-	-	1,2,3,4,5,6,7,8,9,10,11,12,13,14,15,16,17,18,19,20,21,22,23,24,25,26,27,28,29,30,31,32,33,34,35,36,37,38,39,40,41,42	-	1	20
AAGGATGACGACTTTGAGAA	AAGGATGACGACTTTGAGAA	var377	20	0	0	42	-	-	1,2,3,4,5,6,7,8,9,10,11,12,13,14,15,16,17,18,19,20,21,22,23,24,25,26,27,28,29,30,31,32,33,34,35,36,37,38,39,40,41,42	-	1	20
AAGGATGACGACTTTGAGAA	AAGGATGACGACTTTGAGAA	var401	20	0	0	42	-	-	1,2,3,4,5,6,7,8,9,10,11,12,13,14,15,16,17,18,19,20,21,22,23,24,25,26,27,28,29,30,31,32,33,34,35,36,37,38,39,40,41,42	-	1	20
AAGGATGACGACTTTGAGAA	AAGGATGACGACTTTGAGAA	var556	20	0	0	42	-	-	1,2,3,4,5,6,7,8,9,10,11,12,13,14,15,16,17,18,19,20,21,22,23,24,25,26,27,28,29,30,31,32,33,34,35,36,37,38,39,40,41,42	-	1	20
AAGGATGACGACTTTGAGAA	AAGGATGACGACTTTGAGAA	var642	20	0	0	42	-	-	1,2,3,4,5,6,7,8,9,10,11,12,13,14,15,16,17,18,19,20,21,22,23,24,25,26,27,28,29,30,31,32,33,34,35,36,37,38,39,40,41,42	-	1	20
AAGGATGACGACTTTGAGAA	AAGGATGACGACTTTGAGAA	var663	20	0	0	42	-	-	1,2,3,4,5,6,7,8,9,10,11,12,13,14,15,16,17,18,19,20,21,22,23,24,25,26,27,28,29,30,31,32,33,34,35,36,37,38,39,40,41,42	-	1	20
AAGGATGACGACTTTGAGAA	AAGGATGACGACTTTGAGAA	var677	20	0	0	42	-	-	1,2,3,4,5,6,7,8,9,10,11,12,13,14,15,16,17,18,19,20,21,22,23,24,25,26,27,28,29,30,31,32,33,34,35,36,37,38,39,40,41,42	-	1	20
AAGGCCTCAAG	AAGGCCTCAAG	var1203	11	0	0	10	-	-	1,2,3,4,5,6,7,8,9,10	-	1	11
AAGGTGGGAGAACTGA	AAGGTGGGAGAACTGA	var511	16	0	0	27	-	-	1,2,3,4,5,6,7,8,9,10,11,12,13,14,15,16,17,18,19,20,21,22,23,24,25,26,27	-	1	16
AAGGTGGGAGAACTGAAGG	AAGGTGGGAGAACTGAAGG	var1614	19	0	0	27	-	-	1,2,3,4,5,6,7,8,9,10,11,12,13,14,15,16,17,18,19,20,21,22,23,24,25,26,27	-	1	19
AAGGTGGGAGAACTGAAGGATGACGACTTTGAGAA	AAGGTGGGAGAACTGAAGGATGACGACTTTGAGAA	var1204	35	0	0	27	-	-	1,2,3,4,5,6,7,8,9,10,11,12,13,14,15,16,17,18,19,20,21,22,23,24,25,26,27	-	1	35
AAGGTGGGAGAACTGAAGGATGACGACTTTGAGAA	AAGGTGGGAGAACTGAAGGATGACGACTTTGAGAA	var1246	35	0	0	27	-	-	1,2,3,4,5,6,7,8,9,10,11,12,13,14,15,16,17,18,19,20,21,22,23,24,25,26,27	-	1	35
AAGGTGGGAGAACTGAAGGATGACGACTTTGAGAA	AAGGTGGGAGAACTGAAGGATGACGACTTTGAGAA	var1267	35	0	0	27	-	-	1,2,3,4,5,6,7,8,9,10,11,12,13,14,15,16,17,18,19,20,21,22,23,24,25,26,27	-	1	35
AAGGTGGGAGAACTGAAGGATGACGACTTTGAGAA	AAGGTGGGAGAACTGAAGGATGACGACTTTGAGAA	var1530	35	0	0	27	-	-	1,2,3,4,5,6,7,8,9,10,11,12,13,14,15,16,17,18,19,20,21,22,23,24,25,26,27	-	1	35
AAGGTGGGAGAACTGAAGGATGACGACTTTGAGAA	AAGGTGGGAGAACTGAAGGATGACGACTTTGAGAA	var200	35	0	0	27	-	-	1,2,3,4,5,6,7,8,9,10,11,12,13,14,15,16,17,18,19,20,21,22,23,24,25,26,27	-	1	35
AAGGTGGGAGAACTGAAGGATGACGACTTTGAGAA	AAGGTGGGAGAACTGAAGGATGACGACTTTGAGAA	var527	35	0	0	27	-	-	1,2,3,4,5,6,7,8,9,10,11,12,13,14,15,16,17,18,19,20,21,22,23,24,25,26,27	-	1	35
AAGGTGGGAGAACTGAAGGATGACGACTTTGAGAA	AAGGTGGGAGAACTGAAGGATGACGACTTTGAGAA	var580	35	0	0	27	-	-	1,2,3,4,5,6,7,8,9,10,11,12,13,14,15,16,17,18,19,20,21,22,23,24,25,26,27	-	1	35
AAGGTGGGAGAACTGAAGGATGACGACTTTGAGAA	AAGGTGGGAGAACTGAAGGATGACGACTTTGAGAA	var587	35	0	0	27	-	-	1,2,3,4,5,6,7,8,9,10,11,12,13,14,15,16,17,18,19,20,21,22,23,24,25,26,27	-	1	35
AAGGTGGGAGAACTGAAGGATGACGACTTTGAGAA	AAGGTGGGAGAACTGAAGGATGACGACTTTGAGAA	var829	35	0	0	27	-	-	1,2,3,4,5,6,7,8,9,10,11,12,13,14,15,16,17,18,19,20,21,22,23,24,25,26,27	-	1	35
ACCGAAGGATGACGACTTTGAGAA	ACTGAAGGATGACGACTTTGAGAA	var899	2CT21	1	0	0	3	-	-			24
ACGACTTTGAGAA	ACGACTTTGAGAA	var1205	13	0	0	49	-	-	1,2,3,4,5,6,7,8,9,10,11,12,13,14,15,16,17,18,19,20,21,22,23,24,25,26,27,28,29,30,31,32,33,34,35,36,37,38,39,40,41,42,43,44,45,46,47,48,49	-	1	13
ACGACTTTGAGAA	ACGACTTTGAGAA	var1589	13	0	0	49	-	-	1,2,3,4,5,6,7,8,9,10,11,12,13,14,15,16,17,18,19,20,21,22,23,24,25,26,27,28,29,30,31,32,33,34,35,36,37,38,39,40,41,42,43,44,45,46,47,48,49	-	1	13
ACGACTTTGAGAA	ACGACTTTGAGAA	var436	13	0	0	49	-	-	1,2,3,4,5,6,7,8,9,10,11,12,13,14,15,16,17,18,19,20,21,22,23,24,25,26,27,28,29,30,31,32,33,34,35,36,37,38,39,40,41,42,43,44,45,46,47,48,49	-	1	13
ACGACTTTGAGAA	ACGACTTTGAGAA	var604	13	0	0	49	-	-	1,2,3,4,5,6,7,8,9,10,11,12,13,14,15,16,17,18,19,20,21,22,23,24,25,26,27,28,29,30,31,32,33,34,35,36,37,38,39,40,41,42,43,44,45,46,47,48,49	-	1	13
ACGACTTTGAGAA	ACGACTTTGAGAA	var804	13	0	0	49	-	-	1,2,3,4,5,6,7,8,9,10,11,12,13,14,15,16,17,18,19,20,21,22,23,24,25,26,27,28,29,30,31,32,33,34,35,36,37,38,39,40,41,42,43,44,45,46,47,48,49	-	1	13
ACTGAAGGATGACG	ACTGAAGGATGACG	var912	14	0	0	38	-	-	1,2,3,4,5,6,7,8,9,10,11,12,13,14,15,16,17,18,19,20,21,22,23,24,25,26,27,28,29,30,31,32,33,34,35,36,37,38	-	1	14
ACTGAAGGATGACGACTTTGAGAA	ACTGAAGGATGACGACTTTGAGAA	var1103	24	0	0	38	-	-	1,2,3,4,5,6,7,8,9,10,11,12,13,14,15,16,17,18,19,20,21,22,23,24,25,26,27,28,29,30,31,32,33,34,35,36,37,38	-	1	24
ACTGAAGGATGACGACTTTGAGAA	ACTGAAGGATGACGACTTTGAGAA	var160	24	0	0	38	-	-	1,2,3,4,5,6,7,8,9,10,11,12,13,14,15,16,17,18,19,20,21,22,23,24,25,26,27,28,29,30,31,32,33,34,35,36,37,38	-	1	24
ACTGAAGGATGACGACTTTGAGAA	ACTGAAGGATGACGACTTTGAGAA	var1667	24	0	0	38	-	-	1,2,3,4,5,6,7,8,9,10,11,12,13,14,15,16,17,18,19,20,21,22,23,24,25,26,27,28,29,30,31,32,33,34,35,36,37,38	-	1	24
ACTGAAGGATGACGACTTTGAGAA	ACTGAAGGATGACGACTTTGAGAA	var178	24	0	0	38	-	-	1,2,3,4,5,6,7,8,9,10,11,12,13,14,15,16,17,18,19,20,21,22,23,24,25,26,27,28,29,30,31,32,33,34,35,36,37,38	-	1	24
ACTGAAGGATGACGACTTTGAGAA	ACTGAAGGATGACGACTTTGAGAA	var183	24	0	0	38	-	-	1,2,3,4,5,6,7,8,9,10,11,12,13,14,15,16,17,18,19,20,21,22,23,24,25,26,27,28,29,30,31,32,33,34,35,36,37,38	-	1	24
ACTGAAGGATGACGACTTTGAGAA	ACTGAAGGATGACGACTTTGAGAA	var348	24	0	0	38	-	-	1,2,3,4,5,6,7,8,9,10,11,12,13,14,15,16,17,18,19,20,21,22,23,24,25,26,27,28,29,30,31,32,33,34,35,36,37,38	-	1	24
ACTGAAGGATGACGACTTTGAGAA	ACTGAAGGATGACGACTTTGAGAA	var395	24	0	0	38	-	-	1,2,3,4,5,6,7,8,9,10,11,12,13,14,15,16,17,18,19,20,21,22,23,24,25,26,27,28,29,30,31,32,33,34,35,36,37,38	-	1	24
ACTGAAGGATGACGACTTTGAGAA	ACTGAAGGATGACGACTTTGAGAA	var432	24	0	0	38	-	-	1,2,3,4,5,6,7,8,9,10,11,12,13,14,15,16,17,18,19,20,21,22,23,24,25,26,27,28,29,30,31,32,33,34,35,36,37,38	-	1	24
ACTGAAGGATGACGACTTTGAGAA	ACTGAAGGATGACGACTTTGAGAA	var439	24	0	0	38	-	-	1,2,3,4,5,6,7,8,9,10,11,12,13,14,15,16,17,18,19,20,21,22,23,24,25,26,27,28,29,30,31,32,33,34,35,36,37,38	-	1	24
ACTGAAGGATGACGACTTTGAGAA	ACTGAAGGATGACGACTTTGAGAA	var46	24	0	0	38	-	-	1,2,3,4,5,6,7,8,9,10,11,12,13,14,15,16,17,18,19,20,21,22,23,24,25,26,27,28,29,30,31,32,33,34,35,36,37,38	-	1	24
ACTGAAGGATGACGACTTTGAGAA	ACTGAAGGATGACGACTTTGAGAA	var660	24	0	0	38	-	-	1,2,3,4,5,6,7,8,9,10,11,12,13,14,15,16,17,18,19,20,21,22,23,24,25,26,27,28,29,30,31,32,33,34,35,36,37,38	-	1	24
ACTGAAGGATGACGACTTTGAGAA	ACTGAAGGATGACGACTTTGAGAA	var773	24	0	0	38	-	-	1,2,3,4,5,6,7,8,9,10,11,12,13,14,15,16,17,18,19,20,21,22,23,24,25,26,27,28,29,30,31,32,33,34,35,36,37,38	-	1	24
AGAACTGAAGGATGACGAC-TTGAGAA	AGAACTGAAGGATGACGACTTTGAGAA	var1593	19-T7	0	0	1	-	-	20		20	27
AGAACTGAAGGATGACGACTTTGAGAA	AGAACTGAAGGATGACGACTTTGAGAA	var1015	27	0	0	35	-	-	1,2,3,4,5,6,7,8,9,10,11,12,13,14,15,16,17,18,19,20,21,22,23,24,25,26,27,28,29,30,31,32,33,34,35	-	1	27
AGAACTGAAGGATGACGACTTTGAGAA	AGAACTGAAGGATGACGACTTTGAGAA	var1050	27	0	0	35	-	-	1,2,3,4,5,6,7,8,9,10,11,12,13,14,15,16,17,18,19,20,21,22,23,24,25,26,27,28,29,30,31,32,33,34,35	-	1	27
AGAACTGAAGGATGACGACTTTGAGAA	AGAACTGAAGGATGACGACTTTGAGAA	var1066	27	0	0	35	-	-	1,2,3,4,5,6,7,8,9,10,11,12,13,14,15,16,17,18,19,20,21,22,23,24,25,26,27,28,29,30,31,32,33,34,35	-	1	27
AGAACTGAAGGATGACGACTTTGAGAA	AGAACTGAAGGATGACGACTTTGAGAA	var1171	27	0	0	35	-	-	1,2,3,4,5,6,7,8,9,10,11,12,13,14,15,16,17,18,19,20,21,22,23,24,25,26,27,28,29,30,31,32,33,34,35	-	1	27
AGAACTGAAGGATGACGACTTTGAGAA	AGAACTGAAGGATGACGACTTTGAGAA	var1202	27	0	0	35	-	-	1,2,3,4,5,6,7,8,9,10,11,12,13,14,15,16,17,18,19,20,21,22,23,24,25,26,27,28,29,30,31,32,33,34,35	-	1	27
AGAACTGAAGGATGACGACTTTGAGAA	AGAACTGAAGGATGACGACTTTGAGAA	var1203	27	0	0	35	-	-	1,2,3,4,5,6,7,8,9,10,11,12,13,14,15,16,17,18,19,20,21,22,23,24,25,26,27,28,29,30,31,32,33,34,35	-	1	27
AGAACTGAAGGATGACGACTTTGAGAA	AGAACTGAAGGATGACGACTTTGAGAA	var126	27	0	0	35	-	-	1,2,3,4,5,6,7,8,9,10,11,12,13,14,15,16,17,18,19,20,21,22,23,24,25,26,27,28,29,30,31,32,33,34,35	-	1	27
AGAACTGAAGGATGACGACTTTGAGAA	AGAACTGAAGGATGACGACTTTGAGAA	var1307	27	0	0	35	-	-	1,2,3,4,5,6,7,8,9,10,11,12,13,14,15,16,17,18,19,20,21,22,23,24,25,26,27,28,29,30,31,32,33,34,35	-	1	27
AGAACTGAAGGATGACGACTTTGAGAA	AGAACTGAAGGATGACGACTTTGAGAA	var1373	27	0	0	35	-	-	1,2,3,4,5,6,7,8,9,10,11,12,13,14,15,16,17,18,19,20,21,22,23,24,25,26,27,28,29,30,31,32,33,34,35	-	1	27
AGAACTGAAGGATGACGACTTTGAGAA	AGAACTGAAGGATGACGACTTTGAGAA	var1401	27	0	0	35	-	-	1,2,3,4,5,6,7,8,9,10,11,12,13,14,15,16,17,18,19,20,21,22,23,24,25,26,27,28,29,30,31,32,33,34,35	-	1	27
AGAACTGAAGGATGACGACTTTGAGAA	AGAACTGAAGGATGACGACTTTGAGAA	var1433	27	0	0	35	-	-	1,2,3,4,5,6,7,8,9,10,11,12,13,14,15,16,17,18,19,20,21,22,23,24,25,26,27,28,29,30,31,32,33,34,35	-	1	27
AGAACTGAAGGATGACGACTTTGAGAA	AGAACTGAAGGATGACGACTTTGAGAA	var1474	27	0	0	35	-	-	1,2,3,4,5,6,7,8,9,10,11,12,13,14,15,16,17,18,19,20,21,22,23,24,25,26,27,28,29,30,31,32,33,34,35	-	1	27
AGAACTGAAGGATGACGACTTTGAGAA	AGAACTGAAGGATGACGACTTTGAGAA	var1512	27	0	0	35	-	-	1,2,3,4,5,6,7,8,9,10,11,12,13,14,15,16,17,18,19,20,21,22,23,24,25,26,27,28,29,30,31,32,33,34,35	-	1	27
AGAACTGAAGGATGACGACTTTGAGAA	AGAACTGAAGGATGACGACTTTGAGAA	var163	27	0	0	35	-	-	1,2,3,4,5,6,7,8,9,10,11,12,13,14,15,16,17,18,19,20,21,22,23,24,25,26,27,28,29,30,31,32,33,34,35	-	1	27
AGAACTGAAGGATGACGACTTTGAGAA	AGAACTGAAGGATGACGACTTTGAGAA	var1668	27	0	0	35	-	-	1,2,3,4,5,6,7,8,9,10,11,12,13,14,15,16,17,18,19,20,21,22,23,24,25,26,27,28,29,30,31,32,33,34,35	-	1	27
AGAACTGAAGGATGACGACTTTGAGAA	AGAACTGAAGGATGACGACTTTGAGAA	var204	27	0	0	35	-	-	1,2,3,4,5,6,7,8,9,10,11,12,13,14,15,16,17,18,19,20,21,22,23,24,25,26,27,28,29,30,31,32,33,34,35	-	1	27
AGAACTGAAGGATGACGACTTTGAGAA	AGAACTGAAGGATGACGACTTTGAGAA	var380	27	0	0	35	-	-	1,2,3,4,5,6,7,8,9,10,11,12,13,14,15,16,17,18,19,20,21,22,23,24,25,26,27,28,29,30,31,32,33,34,35	-	1	27
AGAACTGAAGGATGACGACTTTGAGAA	AGAACTGAAGGATGACGACTTTGAGAA	var551	27	0	0	35	-	-	1,2,3,4,5,6,7,8,9,10,11,12,13,14,15,16,17,18,19,20,21,22,23,24,25,26,27,28,29,30,31,32,33,34,35	-	1	27
AGAACTGAAGGATGACGACTTTGAGAA	AGAACTGAAGGATGACGACTTTGAGAA	var728	27	0	0	35	-	-	1,2,3,4,5,6,7,8,9,10,11,12,13,14,15,16,17,18,19,20,21,22,23,24,25,26,27,28,29,30,31,32,33,34,35	-	1	27
AGAACTGAAGGATGACGACTTTGAGAA	AGAACTGAAGGATGACGACTTTGAGAA	var755	27	0	0	35	-	-	1,2,3,4,5,6,7,8,9,10,11,12,13,14,15,16,17,18,19,20,21,22,23,24,25,26,27,28,29,30,31,32,33,34,35	-	1	27
AGAACTGAAGGATGACGACTTTGAGAA	AGAACTGAAGGATGACGACTTTGAGAA	var76	27	0	0	35	-	-	1,2,3,4,5,6,7,8,9,10,11,12,13,14,15,16,17,18,19,20,21,22,23,24,25,26,27,28,29,30,31,32,33,34,35	-	1	27
AGAACTGAAGGATGACGACTTTGAGAA	AGAACTGAAGGATGACGACTTTGAGAA	var760	27	0	0	35	-	-	1,2,3,4,5,6,7,8,9,10,11,12,13,14,15,16,17,18,19,20,21,22,23,24,25,26,27,28,29,30,31,32,33,34,35	-	1	27
AGAACTGAAGGATGACGACTTTGAGAA	AGAACTGAAGGATGACGACTTTGAGAA	var824	27	0	0	35	-	-	1,2,3,4,5,6,7,8,9,10,11,12,13,14,15,16,17,18,19,20,21,22,23,24,25,26,27,28,29,30,31,32,33,34,35	-	1	27
AGAACTGAAGGATGACGACTTTGAGAA	AGAACTGAAGGATGACGACTTTGAGAA	var844	27	0	0	35	-	-	1,2,3,4,5,6,7,8,9,10,11,12,13,14,15,16,17,18,19,20,21,22,23,24,25,26,27,28,29,30,31,32,33,34,35	-	1	27
AGAACTGAAGGATGACGACTTTGAGAA	AGAACTGAAGGATGACGACTTTGAGAA	var852	27	0	0	35	-	-	1,2,3,4,5,6,7,8,9,10,11,12,13,14,15,16,17,18,19,20,21,22,23,24,25,26,27,28,29,30,31,32,33,34,35	-	1	27
AGAACTGAAGGATGACGACTTTGAGAA	AGAACTGAAGGATGACGACTTTGAGAA	var947	27	0	0	35	-	-	1,2,3,4,5,6,7,8,9,10,11,12,13,14,15,16,17,18,19,20,21,22,23,24,25,26,27,28,29,30,31,32,33,34,35	-	1	27
AGAAGGTGGGAGAACTGA	AGAAGGTGGGAGAACTGA	var1042	18	0	0	25	-	-	1,2,3,4,5,6,7,8,9,10,11,12,13,14,15,16,17,18,19,20,21,22,23,24,25	-	1	18
AGAAGGTGGGAGAACTGAAGG	AGAAGGTGGGAGAACTGAAGG	var1243	21	0	0	25	-	-	1,2,3,4,5,6,7,8,9,10,11,12,13,14,15,16,17,18,19,20,21,22,23,24,25	-	1	21
AGAAGGTGGGAGAACTGAAGGATGACGACTTTGAGAA	AGAAGGTGGGAGAACTGAAGGATGACGACTTTGAGAA	var1180	37	0	0	25	-	-	1,2,3,4,5,6,7,8,9,10,11,12,13,14,15,16,17,18,19,20,21,22,23,24,25	-	1	37
AGAATGACGACTTTGAGAA	AGGATGACGACTTTGAGAA	var1654	2AG16	1	0	0	3	-	-			19
AGAATGACGACTTTGAGAA	AGGATGACGACTTTGAGAA	var433	2AG16	1	0	0	3	-	-			19
AGCAGGTGGGAGAACTGAAGGATGACGACTTTGAGAA	AGAAGGTGGGAGAACTGAAGGATGACGACTTTGAGAA	var1588	2CA34	1	0	0	3	-	-			37
AGGAGGTGGGAGAACTGAAGGATGACGACTTTGAGAA	AGAAGGTGGGAGAACTGAAGGATGACGACTTTGAGAA	var598	2GA34	1	0	0	3	-	-			37
AGGATGACGACTTTGAGAA	AGGATGACGACTTTGAGAA	var1024	19	0	0	43	-	-	1,2,3,4,5,6,7,8,9,10,11,12,13,14,15,16,17,18,19,20,21,22,23,24,25,26,27,28,29,30,31,32,33,34,35,36,37,38,39,40,41,42,43	-	1	19
AGGATGACGACTTTGAGAA	AGGATGACGACTTTGAGAA	var104	19	0	0	43	-	-	1,2,3,4,5,6,7,8,9,10,11,12,13,14,15,16,17,18,19,20,21,22,23,24,25,26,27,28,29,30,31,32,33,34,35,36,37,38,39,40,41,42,43	-	1	19
AGGATGACGACTTTGAGAA	AGGATGACGACTTTGAGAA	var1622	19	0	0	43	-	-	1,2,3,4,5,6,7,8,9,10,11,12,13,14,15,16,17,18,19,20,21,22,23,24,25,26,27,28,29,30,31,32,33,34,35,36,37,38,39,40,41,42,43	-	1	19
AGGATGACGACTTTGAGAA	AGGATGACGACTTTGAGAA	var1636	19	0	0	43	-	-	1,2,3,4,5,6,7,8,9,10,11,12,13,14,15,16,17,18,19,20,21,22,23,24,25,26,27,28,29,30,31,32,33,34,35,36,37,38,39,40,41,42,43	-	1	19
AGGATGACGACTTTGAGAA	AGGATGACGACTTTGAGAA	var17	19	0	0	43	-	-	1,2,3,4,5,6,7,8,9,10,11,12,13,14,15,16,17,18,19,20,21,22,23,24,25,26,27,28,29,30,31,32,33,34,35,36,37,38,39,40,41,42,43	-	1	19
AGGATGACGACTTTGAGAA	AGGATGACGACTTTGAGAA	var361	19	0	0	43	-	-	1,2,3,4,5,6,7,8,9,10,11,12,13,14,15,16,17,18,19,20,21,22,23,24,25,26,27,28,29,30,31,32,33,34,35,36,37,38,39,40,41,42,43	-	1	19
AGGATGACGACTTTGAGAA	AGGATGACGACTTTGAGAA	var364	19	0	0	43	-	-	1,2,3,4,5,6,7,8,9,10,11,12,13,14,15,16,17,18,19,20,21,22,23,24,25,26,27,28,29,30,31,32,33,34,35,36,37,38,39,40,41,42,43	-	1	19
AGGATGACGACTTTGAGAA	AGGATGACGACTTTGAGAA	var368	19	0	0	43	-	-	1,2,3,4,5,6,7,8,9,10,11,12,13,14,15,16,17,18,19,20,21,22,23,24,25,26,27,28,29,30,31,32,33,34,35,36,37,38,39,40,41,42,43	-	1	19
AGGATGACGACTTTGAGAA	AGGATGACGACTTTGAGAA	var430	19	0	0	43	-	-	1,2,3,4,5,6,7,8,9,10,11,12,13,14,15,16,17,18,19,20,21,22,23,24,25,26,27,28,29,30,31,32,33,34,35,36,37,38,39,40,41,42,43	-	1	19
AGGATGACGACTTTGAGAA	AGGATGACGACTTTGAGAA	var443	19	0	0	43	-	-	1,2,3,4,5,6,7,8,9,10,11,12,13,14,15,16,17,18,19,20,21,22,23,24,25,26,27,28,29,30,31,32,33,34,35,36,37,38,39,40,41,42,43	-	1	19
AGGATGACGACTTTGAGAA	AGGATGACGACTTTGAGAA	var47	19	0	0	43	-	-	1,2,3,4,5,6,7,8,9,10,11,12,13,14,15,16,17,18,19,20,21,22,23,24,25,26,27,28,29,30,31,32,33,34,35,36,37,38,39,40,41,42,43	-	1	19
AGGATGACGACTTTGAGAA	AGGATGACGACTTTGAGAA	var501	19	0	0	43	-	-	1,2,3,4,5,6,7,8,9,10,11,12,13,14,15,16,17,18,19,20,21,22,23,24,25,26,27,28,29,30,31,32,33,34,35,36,37,38,39,40,41,42,43	-	1	19
AGGATGACGACTTTGAGAA	AGGATGACGACTTTGAGAA	var686	19	0	0	43	-	-	1,2,3,4,5,6,7,8,9,10,11,12,13,14,15,16,17,18,19,20,21,22,23,24,25,26,27,28,29,30,31,32,33,34,35,36,37,38,39,40,41,42,43	-	1	19
AGGATGACGACTTTGAGAA	AGGATGACGACTTTGAGAA	var828	19	0	0	43	-	-	1,2,3,4,5,6,7,8,9,10,11,12,13,14,15,16,17,18,19,20,21,22,23,24,25,26,27,28,29,30,31,32,33,34,35,36,37,38,39,40,41,42,43	-	1	19
AGGATGACGACTTTGAGAA	AGGATGACGACTTTGAGAA	var884	19	0	0	43	-	-	1,2,3,4,5,6,7,8,9,10,11,12,13,14,15,16,17,18,19,20,21,22,23,24,25,26,27,28,29,30,31,32,33,34,35,36,37,38,39,40,41,42,43	-	1	19
AGGATGACGACTTTGAGAA	AGGATGACGACTTTGAGAA	var94	19	0	0	43	-	-	1,2,3,4,5,6,7,8,9,10,11,12,13,14,15,16,17,18,19,20,21,22,23,24,25,26,27,28,29,30,31,32,33,34,35,36,37,38,39,40,41,42,43	-	1	19
AGGATGGCGACTTTGAGAA	AGGATGACGACTTTGAGAA	var1040	6GA12	1	0	0	7	-	-			19
AGGCCTTTCTTACCCAGAAG-----------AGAACTGAAGGATGACGACTTTGAGAA	AGGCCTTTCTTACCCAGAAGCAGAAGGTGGGAGAACTGAAGGATGACGACTTTGAGAA	var808	20-C-A-G-A-A-G-G-T-G-G-G27	0	0	11	-	-	21,22,23,24,25,26,27,28,29,30,31		21	58
AGGCCTTTCTTACCCAGAAGCA----GTGGGAGAACTGAAG	AGGCCTTTCTTACCCAGAAGCAGAAGGTGGGAGAACTGAAG	var1282	22-G-A-A-G15	0	0	4	-	-	23,24,25,26		23	41
AGGCCTTTCTTACCCAGAAGCAGAAGGTGGGAGAACTGAAGGATGACGACTTTGAGAA	AGGCCTTTCTTACCCAGAAGCAGAAGGTGGGAGAACTGAAGGATGACGACTTTGAGAA	var1368	58	0	0	4	-	-	1,2,3,4	-	1	58
AGGCGGGAGAACTGAAGGATGACGACTTTGAGAA	AGGTGGGAGAACTGAAGGATGACGACTTTGAGAA	var741	3CT30	1	0	0	4	-	-			34
AGGCTGACGACTTTGAGAA	AGGATGACGACTTTGAGAA	var1483	3CA15	1	0	0	4	-	-			19
AGGGTGACGACTTTGAGAA	AGGATGACGACTTTGAGAA	var1041	3GA15	1	0	0	4	-	-			19
AGGTGG-AGAACTGAAGGATGACGACTTTGAGAA	AGGTGGGAGAACTGAAGGATGACGACTTTGAGAA	var411	6-G27	0	0	1	-	-	7		7	34
AGGTGGGAGAACTG	AGGTGGGAGAACTG	var422	14	0	0	28	-	-	1,2,3,4,5,6,7,8,9,10,11,12,13,14,15,16,17,18,19,20,21,22,23,24,25,26,27,28	-	1	14
AGGTGGGAGAACTGAAGG	AGGTGGGAGAACTGAAGG	var1463	18	0	0	28	-	-	1,2,3,4,5,6,7,8,9,10,11,12,13,14,15,16,17,18,19,20,21,22,23,24,25,26,27,28	-	1	18
AGGTGGGAGAACTGAAGG	AGGTGGGAGAACTGAAGG	var476	18	0	0	28	-	-	1,2,3,4,5,6,7,8,9,10,11,12,13,14,15,16,17,18,19,20,21,22,23,24,25,26,27,28	-	1	18
AGGTGGGAGAACTGAAGG	AGGTGGGAGAACTGAAGG	var705	18	0	0	28	-	-	1,2,3,4,5,6,7,8,9,10,11,12,13,14,15,16,17,18,19,20,21,22,23,24,25,26,27,28	-	1	18
AGGTGGGAGAACTGAAGG	AGGTGGGAGAACTGAAGG	var942	18	0	0	28	-	-	1,2,3,4,5,6,7,8,9,10,11,12,13,14,15,16,17,18,19,20,21,22,23,24,25,26,27,28	-	1	18
AGGTGGGAGAACTGAAGGATGACGACTTTGA	AGGTGGGAGAACTGAAGGATGACGACTTTGA	var1643	31	0	0	28	-	-	1,2,3,4,5,6,7,8,9,10,11,12,13,14,15,16,17,18,19,20,21,22,23,24,25,26,27,28	-	1	31
AGGTGGGAGAACTGAAGGATGACGACTTTGAGAA	AGGTGGGAGAACTGAAGGATGACGACTTTGAGAA	var1073	34	0	0	28	-	-	1,2,3,4,5,6,7,8,9,10,11,12,13,14,15,16,17,18,19,20,21,22,23,24,25,26,27,28	-	1	34
AGGTGGGAGAACTGAAGGATGACGACTTTGAGAA	AGGTGGGAGAACTGAAGGATGACGACTTTGAGAA	var11	34	0	0	28	-	-	1,2,3,4,5,6,7,8,9,10,11,12,13,14,15,16,17,18,19,20,21,22,23,24,25,26,27,28	-	1	34
AGGTGGGAGAACTGAAGGATGACGACTTTGAGAA	AGGTGGGAGAACTGAAGGATGACGACTTTGAGAA	var120	34	0	0	28	-	-	1,2,3,4,5,6,7,8,9,10,11,12,13,14,15,16,17,18,19,20,21,22,23,24,25,26,27,28	-	1	34
AGGTGGGAGAACTGAAGGATGACGACTTTGAGAA	AGGTGGGAGAACTGAAGGATGACGACTTTGAGAA	var1447	34	0	0	28	-	-	1,2,3,4,5,6,7,8,9,10,11,12,13,14,15,16,17,18,19,20,21,22,23,24,25,26,27,28	-	1	34
AGGTGGGAGAACTGAAGGATGACGACTTTGAGAA	AGGTGGGAGAACTGAAGGATGACGACTTTGAGAA	var145	34	0	0	28	-	-	1,2,3,4,5,6,7,8,9,10,11,12,13,14,15,16,17,18,19,20,21,22,23,24,25,26,27,28	-	1	34
AGGTGGGAGAACTGAAGGATGACGACTTTGAGAA	AGGTGGGAGAACTGAAGGATGACGACTTTGAGAA	var1489	34	0	0	28	-	-	1,2,3,4,5,6,7,8,9,10,11,12,13,14,15,16,17,18,19,20,21,22,23,24,25,26,27,28	-	1	34
AGGTGGGAGAACTGAAGGATGACGACTTTGAGAA	AGGTGGGAGAACTGAAGGATGACGACTTTGAGAA	var1508	34	0	0	28	-	-	1,2,3,4,5,6,7,8,9,10,11,12,13,14,15,16,17,18,19,20,21,22,23,24,25,26,27,28	-	1	34
AGGTGGGAGAACTGAAGGATGACGACTTTGAGAA	AGGTGGGAGAACTGAAGGATGACGACTTTGAGAA	var1565	34	0	0	28	-	-	1,2,3,4,5,6,7,8,9,10,11,12,13,14,15,16,17,18,19,20,21,22,23,24,25,26,27,28	-	1	34
AGGTGGGAGAACTGAAGGATGACGACTTTGAGAA	AGGTGGGAGAACTGAAGGATGACGACTTTGAGAA	var162	34	0	0	28	-	-	1,2,3,4,5,6,7,8,9,10,11,12,13,14,15,16,17,18,19,20,21,22,23,24,25,26,27,28	-	1	34
AGGTGGGAGAACTGAAGGATGACGACTTTGAGAA	AGGTGGGAGAACTGAAGGATGACGACTTTGAGAA	var245	34	0	0	28	-	-	1,2,3,4,5,6,7,8,9,10,11,12,13,14,15,16,17,18,19,20,21,22,23,24,25,26,27,28	-	1	34
AGGTGGGAGAACTGAAGGATGACGACTTTGAGAA	AGGTGGGAGAACTGAAGGATGACGACTTTGAGAA	var268	34	0	0	28	-	-	1,2,3,4,5,6,7,8,9,10,11,12,13,14,15,16,17,18,19,20,21,22,23,24,25,26,27,28	-	1	34
AGGTGGGAGAACTGAAGGATGACGACTTTGAGAA	AGGTGGGAGAACTGAAGGATGACGACTTTGAGAA	var328	34	0	0	28	-	-	1,2,3,4,5,6,7,8,9,10,11,12,13,14,15,16,17,18,19,20,21,22,23,24,25,26,27,28	-	1	34
AGGTGGGAGAACTGAAGGATGACGACTTTGAGAA	AGGTGGGAGAACTGAAGGATGACGACTTTGAGAA	var365	34	0	0	28	-	-	1,2,3,4,5,6,7,8,9,10,11,12,13,14,15,16,17,18,19,20,21,22,23,24,25,26,27,28	-	1	34
AGGTGGGAGAACTGAAGGATGACGACTTTGAGAA	AGGTGGGAGAACTGAAGGATGACGACTTTGAGAA	var374	34	0	0	28	-	-	1,2,3,4,5,6,7,8,9,10,11,12,13,14,15,16,17,18,19,20,21,22,23,24,25,26,27,28	-	1	34
AGGTGGGAGAACTGAAGGATGACGACTTTGAGAA	AGGTGGGAGAACTGAAGGATGACGACTTTGAGAA	var424	34	0	0	28	-	-	1,2,3,4,5,6,7,8,9,10,11,12,13,14,15,16,17,18,19,20,21,22,23,24,25,26,27,28	-	1	34
AGGTGGGAGAACTGAAGGATGACGACTTTGAGAA	AGGTGGGAGAACTGAAGGATGACGACTTTGAGAA	var552	34	0	0	28	-	-	1,2,3,4,5,6,7,8,9,10,11,12,13,14,15,16,17,18,19,20,21,22,23,24,25,26,27,28	-	1	34
AGGTGGGAGAACTGAAGGATGACGACTTTGAGAA	AGGTGGGAGAACTGAAGGATGACGACTTTGAGAA	var653	34	0	0	28	-	-	1,2,3,4,5,6,7,8,9,10,11,12,13,14,15,16,17,18,19,20,21,22,23,24,25,26,27,28	-	1	34
AGGTGGGAGAACTGAAGGATGACGACTTTGAGAA	AGGTGGGAGAACTGAAGGATGACGACTTTGAGAA	var692	34	0	0	28	-	-	1,2,3,4,5,6,7,8,9,10,11,12,13,14,15,16,17,18,19,20,21,22,23,24,25,26,27,28	-	1	34
AGGTGGGAGAACTGAAGGATGACGACTTTGAGAA	AGGTGGGAGAACTGAAGGATGACGACTTTGAGAA	var77	34	0	0	28	-	-	1,2,3,4,5,6,7,8,9,10,11,12,13,14,15,16,17,18,19,20,21,22,23,24,25,26,27,28	-	1	34
AGGTGGGAGAACTGAAGGATGACGACTTTGAGAA	AGGTGGGAGAACTGAAGGATGACGACTTTGAGAA	var775	34	0	0	28	-	-	1,2,3,4,5,6,7,8,9,10,11,12,13,14,15,16,17,18,19,20,21,22,23,24,25,26,27,28	-	1	34
AGGTGGGAGAACTGAAGGATGACGACTTTGAGAA	AGGTGGGAGAACTGAAGGATGACGACTTTGAGAA	var805	34	0	0	28	-	-	1,2,3,4,5,6,7,8,9,10,11,12,13,14,15,16,17,18,19,20,21,22,23,24,25,26,27,28	-	1	34
AGGTGGGAGAACTGAAGGATGACGACTTTGAGAA	AGGTGGGAGAACTGAAGGATGACGACTTTGAGAA	var972	34	0	0	28	-	-	1,2,3,4,5,6,7,8,9,10,11,12,13,14,15,16,17,18,19,20,21,22,23,24,25,26,27,28	-	1	34
AGGTGGGAGAACTGAAGGATGACGACTTTGAGAA	AGGTGGGAGAACTGAAGGATGACGACTTTGAGAA	var979	34	0	0	28	-	-	1,2,3,4,5,6,7,8,9,10,11,12,13,14,15,16,17,18,19,20,21,22,23,24,25,26,27,28	-	1	34
AGGTGGGCGAACTGAAGGATGACGACTTTGAGAA	AGGTGGGAGAACTGAAGGATGACGACTTTGAGAA	var387	7CA26	1	0	0	8	-	-			34
AGGTGGGTAAGAACTGAAGGATGACGACTTTGAGAA	AGGTGGG--AGAACTGAAGGATGACGACTTTGAGAA	var872	7T-A-27	0	2	0	-	8,9	-	8		36
AGGTGTGAGAACTGAAGGATGACGACTTTGAGAA	AGGTGGGAGAACTGAAGGATGACGACTTTGAGAA	var1572	5TG28	1	0	0	6	-	-			34
ATGACGACTTTGAGAA	ATGACGACTTTGAGAA	var1000	16	0	0	46	-	-	1,2,3,4,5,6,7,8,9,10,11,12,13,14,15,16,17,18,19,20,21,22,23,24,25,26,27,28,29,30,31,32,33,34,35,36,37,38,39,40,41,42,43,44,45,46	-	1	16
ATGACGACTTTGAGAA	ATGACGACTTTGAGAA	var1323	16	0	0	46	-	-	1,2,3,4,5,6,7,8,9,10,11,12,13,14,15,16,17,18,19,20,21,22,23,24,25,26,27,28,29,30,31,32,33,34,35,36,37,38,39,40,41,42,43,44,45,46	-	1	16
ATGACGACTTTGAGAA	ATGACGACTTTGAGAA	var1505	16	0	0	46	-	-	1,2,3,4,5,6,7,8,9,10,11,12,13,14,15,16,17,18,19,20,21,22,23,24,25,26,27,28,29,30,31,32,33,34,35,36,37,38,39,40,41,42,43,44,45,46	-	1	16
ATGACGACTTTGAGAA	ATGACGACTTTGAGAA	var1537	16	0	0	46	-	-	1,2,3,4,5,6,7,8,9,10,11,12,13,14,15,16,17,18,19,20,21,22,23,24,25,26,27,28,29,30,31,32,33,34,35,36,37,38,39,40,41,42,43,44,45,46	-	1	16
ATGACGACTTTGAGAA	ATGACGACTTTGAGAA	var262	16	0	0	46	-	-	1,2,3,4,5,6,7,8,9,10,11,12,13,14,15,16,17,18,19,20,21,22,23,24,25,26,27,28,29,30,31,32,33,34,35,36,37,38,39,40,41,42,43,44,45,46	-	1	16
ATGACGACTTTGAGAA	ATGACGACTTTGAGAA	var314	16	0	0	46	-	-	1,2,3,4,5,6,7,8,9,10,11,12,13,14,15,16,17,18,19,20,21,22,23,24,25,26,27,28,29,30,31,32,33,34,35,36,37,38,39,40,41,42,43,44,45,46	-	1	16
ATGACGACTTTGAGAA	ATGACGACTTTGAGAA	var406	16	0	0	46	-	-	1,2,3,4,5,6,7,8,9,10,11,12,13,14,15,16,17,18,19,20,21,22,23,24,25,26,27,28,29,30,31,32,33,34,35,36,37,38,39,40,41,42,43,44,45,46	-	1	16
CAGAAGCAGAAGGTGGGAGAACTGAA	CAGAAGCAGAAGGTGGGAGAACTGAA	var943	26	0	0	18	-	-	1,2,3,4,5,6,7,8,9,10,11,12,13,14,15,16,17,18	-	1	26
CAGAAGGTGGGAGAACTGAA	CAGAAGGTGGGAGAACTGAA	var1061	20	0	0	24	-	-	1,2,3,4,5,6,7,8,9,10,11,12,13,14,15,16,17,18,19,20,21,22,23,24	-	1	20
CAGAAGGTGGGAGAACTGAAGGATGACGACTTTGAGAA	CAGAAGGTGGGAGAACTGAAGGATGACGACTTTGAGAA	var417	38	0	0	24	-	-	1,2,3,4,5,6,7,8,9,10,11,12,13,14,15,16,17,18,19,20,21,22,23,24	-	1	38
CAGCAGGTGGGAGAACTGAAGGATGACGACTTTGAGAA	CAGAAGGTGGGAGAACTGAAGGATGACGACTTTGAGAA	var641	3CA34	1	0	0	4	-	-			38
CAGTTCTCCCA	CAGTTCTCCCA	var509	11	0	0	41	-	-	1,2,3,4,5,6,7,8,9,10,11,12,13,14,15,16,17,18,19,20,21,22,23,24,25,26,27,28,29,30,31,32,33,34,35,36,37,38,39,40,41	-	1	11
CAGTTCTCCCA	CAGTTCTCCCA	var704	11	0	0	41	-	-	1,2,3,4,5,6,7,8,9,10,11,12,13,14,15,16,17,18,19,20,21,22,23,24,25,26,27,28,29,30,31,32,33,34,35,36,37,38,39,40,41	-	1	11
CAGTTCTCCCA	CAGTTCTCCCA	var710	11	0	0	41	-	-	1,2,3,4,5,6,7,8,9,10,11,12,13,14,15,16,17,18,19,20,21,22,23,24,25,26,27,28,29,30,31,32,33,34,35,36,37,38,39,40,41	-	1	11
CAGTTCTCCCACCT	CAGTTCTCCCACCT	var1189	14	0	0	41	-	-	1,2,3,4,5,6,7,8,9,10,11,12,13,14,15,16,17,18,19,20,21,22,23,24,25,26,27,28,29,30,31,32,33,34,35,36,37,38,39,40,41	-	1	14
CATCCTTCAGT	CATCCTTCAGT	var1218	11	0	0	48	-	-	1,2,3,4,5,6,7,8,9,10,11,12,13,14,15,16,17,18,19,20,21,22,23,24,25,26,27,28,29,30,31,32,33,34,35,36,37,38,39,40,41,42,43,44,45,46,47,48	-	1	11
CCATCTGCTTCTGG	CCTTCTGCTTCTGG	var825	2AT11	1	0	0	3	-	-			14
CCCACCTTCTG	CCCACCTTCTG	var1397	11	0	0	34	-	-	1,2,3,4,5,6,7,8,9,10,11,12,13,14,15,16,17,18,19,20,21,22,23,24,25,26,27,28,29,30,31,32,33,34	-	1	11
CCTTTCTTACC	CCTTTCTTACC	var532	11	0	0	7	-	-	1,2,3,4,5,6,7	-	1	11
CGACTTTGAGAA	CGACTTTGAGAA	var1211	12	0	0	50	-	-	1,2,3,4,5,6,7,8,9,10,11,12,13,14,15,16,17,18,19,20,21,22,23,24,25,26,27,28,29,30,31,32,33,34,35,36,37,38,39,40,41,42,43,44,45,46,47,48,49,50	-	1	12
CGACTTTGAGAA	CGACTTTGAGAA	var1344	12	0	0	50	-	-	1,2,3,4,5,6,7,8,9,10,11,12,13,14,15,16,17,18,19,20,21,22,23,24,25,26,27,28,29,30,31,32,33,34,35,36,37,38,39,40,41,42,43,44,45,46,47,48,49,50	-	1	12
CGACTTTGAGAA	CGACTTTGAGAA	var1500	12	0	0	50	-	-	1,2,3,4,5,6,7,8,9,10,11,12,13,14,15,16,17,18,19,20,21,22,23,24,25,26,27,28,29,30,31,32,33,34,35,36,37,38,39,40,41,42,43,44,45,46,47,48,49,50	-	1	12
CTAGAGGCCTTTCTTACCCAGAAGCAGAAGGTGGGAGAACTGAAGGATGACGACTTTGAGAA	CTTGAGGCCTTTCTTACCCAGAAGCAGAAGGTGGGAGAACTGAAGGATGACGACTTTGAGAA	var664	2AT59	1	0	0	3	-	-			62
CTCGAGGCCTTTCTTACCCAGA------AGGTGGGAGAACTGAAGGATGACGACTTTGAGAA	CTTGAGGCCTTTCTTACCCAGAAGCAGAAGGTGGGAGAACTGAAGGATGACGACTTTGAGAA	var935	2CT19-A-G-C-A-G-A34	1	0	6	3	-	23,24,25,26,27,28		23	62
CTCGAGGCCTTTCTTACCCAGAAGCAG---GTGGGAGAACTGAAGGATGACGACTTTGAGAA	CTTGAGGCCTTTCTTACCCAGAAGCAGAAGGTGGGAGAACTGAAGGATGACGACTTTGAGAA	var336	2CT24-A-A-G32	1	0	3	3	-	28,29,30		28	62
CTCGAGGCCTTTCTTACCCAGAAGCAGA--------GAACTGAAGGATGACGACTTTGAGAA	CTTGAGGCCTTTCTTACCCAGAAGCAGAAGGTGGGAGAACTGAAGGATGACGACTTTGAGAA	var1411	2CT25-A-G-G-T-G-G-G-A26	1	0	8	3	-	29,30,31,32,33,34,35,36		29	62
CTCGAGGCCTTTCTTACCCAGAAGCAGA-GGTGGGAGAACTGAAGGATGACGACTTTGAGAA	CTTGAGGCCTTTCTTACCCAGAAGCAGAAGGTGGGAGAACTGAAGGATGACGACTTTGAGAA	var863	2CT25-A33	1	0	1	3	-	29		29	62
CTCGAGGCCTTTCTTACCCAGAAGCAGAA----------CTGAAGGATGACGACTTTGAGAA	CTTGAGGCCTTTCTTACCCAGAAGCAGAAGGTGGGAGAACTGAAGGATGACGACTTTGAGAA	var924	2CT26-G-G-T-G-G-G-A-G-A-A23	1	0	10	3	-	30,31,32,33,34,35,36,37,38,39		30	62
CTCGAGGCCTTTCTTACCCAGAAGCAGAAAGGTGGGAGAACTGAAGGATGACGACTTTGAGA	CTTGAGGCCTTTCTTACCCAGAAGCAGAA-GGTGGGAGAACTGAAGGATGACGACTTTGAGA	var323	2CT26A-32	1	1	0	3	30	-	30		62
CTCGAGGCCTTTCTTACCCAGAAGCAGAAGGTGGGAGAACTGAAGGATGACGACTTTGAGAA	CTTGAGGCCTTTCTTACCCAGAAGCAGAAGGTGGGAGAACTGAAGGATGACGACTTTGAGAA	var73	2CT59	1	0	0	3	-	-			62
CTGAAGGATGACGACTTTGAGAA	CTGAAGGATGACGACTTTGAGAA	var1152	23	0	0	39	-	-	1,2,3,4,5,6,7,8,9,10,11,12,13,14,15,16,17,18,19,20,21,22,23,24,25,26,27,28,29,30,31,32,33,34,35,36,37,38,39	-	1	23
CTGAAGGATGACGACTTTGAGAA	CTGAAGGATGACGACTTTGAGAA	var121	23	0	0	39	-	-	1,2,3,4,5,6,7,8,9,10,11,12,13,14,15,16,17,18,19,20,21,22,23,24,25,26,27,28,29,30,31,32,33,34,35,36,37,38,39	-	1	23
CTGAAGGATGACGACTTTGAGAA	CTGAAGGATGACGACTTTGAGAA	var1397	23	0	0	39	-	-	1,2,3,4,5,6,7,8,9,10,11,12,13,14,15,16,17,18,19,20,21,22,23,24,25,26,27,28,29,30,31,32,33,34,35,36,37,38,39	-	1	23
CTGAAGGATGACGACTTTGAGAA	CTGAAGGATGACGACTTTGAGAA	var1646	23	0	0	39	-	-	1,2,3,4,5,6,7,8,9,10,11,12,13,14,15,16,17,18,19,20,21,22,23,24,25,26,27,28,29,30,31,32,33,34,35,36,37,38,39	-	1	23
CTGAAGGATGACGACTTTGAGAA	CTGAAGGATGACGACTTTGAGAA	var1665	23	0	0	39	-	-	1,2,3,4,5,6,7,8,9,10,11,12,13,14,15,16,17,18,19,20,21,22,23,24,25,26,27,28,29,30,31,32,33,34,35,36,37,38,39	-	1	23
CTGAAGGATGACGACTTTGAGAA	CTGAAGGATGACGACTTTGAGAA	var167	23	0	0	39	-	-	1,2,3,4,5,6,7,8,9,10,11,12,13,14,15,16,17,18,19,20,21,22,23,24,25,26,27,28,29,30,31,32,33,34,35,36,37,38,39	-	1	23
CTGAAGGATGACGACTTTGAGAA	CTGAAGGATGACGACTTTGAGAA	var32	23	0	0	39	-	-	1,2,3,4,5,6,7,8,9,10,11,12,13,14,15,16,17,18,19,20,21,22,23,24,25,26,27,28,29,30,31,32,33,34,35,36,37,38,39	-	1	23
CTGAAGGATGACGACTTTGAGAA	CTGAAGGATGACGACTTTGAGAA	var33	23	0	0	39	-	-	1,2,3,4,5,6,7,8,9,10,11,12,13,14,15,16,17,18,19,20,21,22,23,24,25,26,27,28,29,30,31,32,33,34,35,36,37,38,39	-	1	23
CTGAAGGATGACGACTTTGAGAA	CTGAAGGATGACGACTTTGAGAA	var402	23	0	0	39	-	-	1,2,3,4,5,6,7,8,9,10,11,12,13,14,15,16,17,18,19,20,21,22,23,24,25,26,27,28,29,30,31,32,33,34,35,36,37,38,39	-	1	23
CTGAAGGATGACGACTTTGAGAA	CTGAAGGATGACGACTTTGAGAA	var601	23	0	0	39	-	-	1,2,3,4,5,6,7,8,9,10,11,12,13,14,15,16,17,18,19,20,21,22,23,24,25,26,27,28,29,30,31,32,33,34,35,36,37,38,39	-	1	23
CTGAAGGATGACGACTTTGAGAA	CTGAAGGATGACGACTTTGAGAA	var738	23	0	0	39	-	-	1,2,3,4,5,6,7,8,9,10,11,12,13,14,15,16,17,18,19,20,21,22,23,24,25,26,27,28,29,30,31,32,33,34,35,36,37,38,39	-	1	23
CTGAAGGATGACGACTTTGAGAA	CTGAAGGATGACGACTTTGAGAA	var895	23	0	0	39	-	-	1,2,3,4,5,6,7,8,9,10,11,12,13,14,15,16,17,18,19,20,21,22,23,24,25,26,27,28,29,30,31,32,33,34,35,36,37,38,39	-	1	23
CTGAAGGCTGACGACTTTGAGAA	CTGAAGGATGACGACTTTGAGAA	var474	7CA15	1	0	0	8	-	-			23
CTGACGGATGACGACTTTGAGAA	CTGAAGGATGACGACTTTGAGAA	var1486	4CA18	1	0	0	5	-	-			23
CTGCTTCTGGG	CTGCTTCTGGG	var335	11	0	0	26	-	-	1,2,3,4,5,6,7,8,9,10,11,12,13,14,15,16,17,18,19,20,21,22,23,24,25,26	-	1	11
CTGCTTCTGGGT	CTGCTTCTGGGT	var1327	12	0	0	26	-	-	1,2,3,4,5,6,7,8,9,10,11,12,13,14,15,16,17,18,19,20,21,22,23,24,25,26	-	1	12
CTGCTTCTGGGTAAGAAAGG	CTGCTTCTGGGTAAGAAAGG	var580	20	0	0	26	-	-	1,2,3,4,5,6,7,8,9,10,11,12,13,14,15,16,17,18,19,20,21,22,23,24,25,26	-	1	20
CTGGAGGCCTTTCTTACCCAGAAGCAGAAGGTGGGAGAACTGAAGGATGACGACTTTGAGAA	CTTGAGGCCTTTCTTACCCAGAAGCAGAAGGTGGGAGAACTGAAGGATGACGACTTTGAGAA	var875	2GT59	1	0	0	3	-	-			62
CTGGGTAAGAA	CTGGGTAAGAA	var1490	11	0	0	20	-	-	1,2,3,4,5,6,7,8,9,10,11,12,13,14,15,16,17,18,19,20	-	1	11
CTGGGTAAGAA	CTGGGTAAGAA	var1604	11	0	0	20	-	-	1,2,3,4,5,6,7,8,9,10,11,12,13,14,15,16,17,18,19,20	-	1	11
CTGGGTAAGAA	CTGGGTAAGAA	var511	11	0	0	20	-	-	1,2,3,4,5,6,7,8,9,10,11,12,13,14,15,16,17,18,19,20	-	1	11
CTGGGTAAGAAA	CTGGGTAAGAAA	var1465	12	0	0	20	-	-	1,2,3,4,5,6,7,8,9,10,11,12,13,14,15,16,17,18,19,20	-	1	12
CTGGGTAAGAAA	CTGGGTAAGAAA	var969	12	0	0	20	-	-	1,2,3,4,5,6,7,8,9,10,11,12,13,14,15,16,17,18,19,20	-	1	12
CTTAAGGATGACGACTTTGAGAA	CTGAAGGATGACGACTTTGAGAA	var106	2TG20	1	0	0	3	-	-			23
CTTAAGGATGACGACTTTGAGAA	CTGAAGGATGACGACTTTGAGAA	var1134	2TG20	1	0	0	3	-	-			23
CTTAAGGATGACGACTTTGAGAA	CTGAAGGATGACGACTTTGAGAA	var962	2TG20	1	0	0	3	-	-			23
CTTAAGGCCTTTCTTACCCAGAAGCAG---GTGGGAGAACTGAAGGATGACGACTTTGAGAA	CTTGAGGCCTTTCTTACCCAGAAGCAGAAGGTGGGAGAACTGAAGGATGACGACTTTGAGAA	var985	3AG23-A-A-G32	1	0	3	4	-	28,29,30		28	62
CTTAAGGCCTTTCTTACCCAGAAGCAGAAAGGTGGGAGAACTGAAGGATGACGACTTTGAGA	CTTGAGGCCTTTCTTACCCAGAAGCAGAA-GGTGGGAGAACTGAAGGATGACGACTTTGAGA	var809	3AG25A-32	1	1	0	4	30	-	30		62
CTTAAGGCCTTTCTTACCCAGAAGCAGAAGGTGGGAGAACTGAAGGATGACGACTTTGAGAA	CTTGAGGCCTTTCTTACCCAGAAGCAGAAGGTGGGAGAACTGAAGGATGACGACTTTGAGAA	var227	3AG58	1	0	0	4	-	-			62
CTTACCCAGAAGCAGAA------TGAACTGAAGGAT	CTTACCCAGAAGCAGAAGGTGGGAGAACTGAAGGAT	var1661	17-G-G-T-G-G-GTA12	1	0	6	24	-	18,19,20,21,22,23		18	36
CTTCAGTTCTCCCACCT	CTTCAGTTCTCCCACCT	var1316	17	0	0	44	-	-	1,2,3,4,5,6,7,8,9,10,11,12,13,14,15,16,17,18,19,20,21,22,23,24,25,26,27,28,29,30,31,32,33,34,35,36,37,38,39,40,41,42,43,44	-	1	17
CTTCTGCTTCT	CTTCTGCTTCT	var1543	11	0	0	29	-	-	1,2,3,4,5,6,7,8,9,10,11,12,13,14,15,16,17,18,19,20,21,22,23,24,25,26,27,28,29	-	1	11
CTTCTGCTTCTGG	CTTCTGCTTCTGG	var1544	13	0	0	29	-	-	1,2,3,4,5,6,7,8,9,10,11,12,13,14,15,16,17,18,19,20,21,22,23,24,25,26,27,28,29	-	1	13
CTTCTGCTTCTGGGTAAGAAAG	CTTCTGCTTCTGGGTAAGAAAG	var1663	22	0	0	29	-	-	1,2,3,4,5,6,7,8,9,10,11,12,13,14,15,16,17,18,19,20,21,22,23,24,25,26,27,28,29	-	1	22
CTTCTGGGTAAG	CTTCTGGGTAAG	var200	12	0	0	23	-	-	1,2,3,4,5,6,7,8,9,10,11,12,13,14,15,16,17,18,19,20,21,22,23	-	1	12
CTTCTGGGTAAGAA	CTTCTGGGTAAGAA	var1307	14	0	0	23	-	-	1,2,3,4,5,6,7,8,9,10,11,12,13,14,15,16,17,18,19,20,21,22,23	-	1	14
CTTCTGGGTAAGAAAGG	CTTCTGGGTAAGAAAGG	var1267	17	0	0	23	-	-	1,2,3,4,5,6,7,8,9,10,11,12,13,14,15,16,17,18,19,20,21,22,23	-	1	17
CTTGAAGCCTTTCTTACCCAGAAGCAG---GTGGGAGAACTGAAGGATGACGACTTTGAGAA	CTTGAGGCCTTTCTTACCCAGAAGCAGAAGGTGGGAGAACTGAAGGATGACGACTTTGAGAA	var1158	5AG21-A-A-G32	1	0	3	6	-	28,29,30		28	62
CTTGAAGCCTTTCTTACCCAGAAGCAGAAAGGTGGGAGAACTGAAGGATGACGACTTTGAGA	CTTGAGGCCTTTCTTACCCAGAAGCAGAA-GGTGGGAGAACTGAAGGATGACGACTTTGAGA	var735	5AG23A-32	1	1	0	6	30	-	30		62
CTTGAAGCCTTTCTTACCCAGAAGCAGAAGGTGGGAGAACTGAAGGATGACGACTTTGAGAA	CTTGAGGCCTTTCTTACCCAGAAGCAGAAGGTGGGAGAACTGAAGGATGACGACTTTGAGAA	var201	5AG56	1	0	0	6	-	-			62
CTTGAGACCTTTCTTACCCAGAAGCAG---GTGGGAGAACTGAAGGATGACGACTTTGAGAA	CTTGAGGCCTTTCTTACCCAGAAGCAGAAGGTGGGAGAACTGAAGGATGACGACTTTGAGAA	var616	6AG20-A-A-G32	1	0	3	7	-	28,29,30		28	62
CTTGAGACCTTTCTTACCCAGAAGCAGAAAGGTGGGAGAACTGAAGGATGACGACTTTGAGA	CTTGAGGCCTTTCTTACCCAGAAGCAGAA-GGTGGGAGAACTGAAGGATGACGACTTTGAGA	var792	6AG22A-32	1	1	0	7	30	-	30		62
CTTGAGACCTTTCTTACCCAGAAGCAGAAGGTGGGAGAACTGAAGGATGACGACTTTGAGAA	CTTGAGGCCTTTCTTACCCAGAAGCAGAAGGTGGGAGAACTGAAGGATGACGACTTTGAGAA	var197	6AG55	1	0	0	7	-	-			62
CTTGAGCCCTTTCTTACCCAGAAGCAG---GTGGGAGAACTGAAGGATGACGACTTTGAGAA	CTTGAGGCCTTTCTTACCCAGAAGCAGAAGGTGGGAGAACTGAAGGATGACGACTTTGAGAA	var1133	6CG20-A-A-G32	1	0	3	7	-	28,29,30		28	62
CTTGAGCCCTTTCTTACCCAGAAGCAGAAGGTGGGAGAACTGAAGGATGACGACTTTGAGAA	CTTGAGGCCTTTCTTACCCAGAAGCAGAAGGTGGGAGAACTGAAGGATGACGACTTTGAGAA	var250	6CG55	1	0	0	7	-	-			62
CTTGAGGACTTTCTTACCCAGAAGCAGAAGGTGGGAGAACTGAAGGATGACGACTTTGAGAA	CTTGAGGCCTTTCTTACCCAGAAGCAGAAGGTGGGAGAACTGAAGGATGACGACTTTGAGAA	var763	7AC54	1	0	0	8	-	-			62
CTTGAGGCATTTCTTACCCAGAAGCAGAAGGTGGGAGAACTGAAGGATGACGACTTTGAGAA	CTTGAGGCCTTTCTTACCCAGAAGCAGAAGGTGGGAGAACTGAAGGATGACGACTTTGAGAA	var399	8AC53	1	0	0	9	-	-			62
CTTGAGGCCATTCTTACCCAGAAGCAGAAAGGTGGGAGAACTGAAGGATGACGACTTTGAGA	CTTGAGGCCTTTCTTACCCAGAAGCAGAA-GGTGGGAGAACTGAAGGATGACGACTTTGAGA	var1179	9AT19A-32	1	1	0	10	30	-	30		62
CTTGAGGCCATTCTTACCCAGAAGCAGAAGGTGGGAGAACTGAAGGATGACGACTTTGAGAA	CTTGAGGCCTTTCTTACCCAGAAGCAGAAGGTGGGAGAACTGAAGGATGACGACTTTGAGAA	var311	9AT52	1	0	0	10	-	-			62
CTTGAGGCCCTTCTTACCCAG---------GTGGGAGAACTGAAGGATGACGACTTTGAGAA	CTTGAGGCCTTTCTTACCCAGAAGCAGAAGGTGGGAGAACTGAAGGATGACGACTTTGAGAA	var1437	9CT11-A-A-G-C-A-G-A-A-G32	1	0	9	10	-	22,23,24,25,26,27,28,29,30		22	62
CTTGAGGCCCTTCTTACCCAGA------AGGTGGGAGAACTGAAGGATGACGACTTTGAGAA	CTTGAGGCCTTTCTTACCCAGAAGCAGAAGGTGGGAGAACTGAAGGATGACGACTTTGAGAA	var855	9CT12-A-G-C-A-G-A34	1	0	6	10	-	23,24,25,26,27,28		23	62
CTTGAGGCCCTTCTTACCCAGAA	CTTGAGGCCTTTCTTACCCAGAA	var1433	9CT13	1	0	0	10	-	-			23
CTTGAGGCCCTTCTTACCCAGAAGCAG---GTGGGAGAACTGAAGGATGACGACTTTGAGAA	CTTGAGGCCTTTCTTACCCAGAAGCAGAAGGTGGGAGAACTGAAGGATGACGACTTTGAGAA	var247	9CT17-A-A-G32	1	0	3	10	-	28,29,30		28	62
CTTGAGGCCCTTCTTACCCAGAAGCAGA--------GAACTGAAGGATGACGACTTTGAGAA	CTTGAGGCCTTTCTTACCCAGAAGCAGAAGGTGGGAGAACTGAAGGATGACGACTTTGAGAA	var1336	9CT18-A-G-G-T-G-G-G-A26	1	0	8	10	-	29,30,31,32,33,34,35,36		29	62
CTTGAGGCCCTTCTTACCCAGAAGCAGA-GGTGGGAGAACTGAAGGATGACGACTTTGAGAA	CTTGAGGCCTTTCTTACCCAGAAGCAGAAGGTGGGAGAACTGAAGGATGACGACTTTGAGAA	var557	9CT18-A33	1	0	1	10	-	29		29	62
CTTGAGGCCCTTCTTACCCAGAAGCAGAA----------CTGAAGGATGACGACTTTGAGAA	CTTGAGGCCTTTCTTACCCAGAAGCAGAAGGTGGGAGAACTGAAGGATGACGACTTTGAGAA	var571	9CT19-G-G-T-G-G-G-A-G-A-A23	1	0	10	10	-	30,31,32,33,34,35,36,37,38,39		30	62
CTTGAGGCCCTTCTTACCCAGAAGCAGAAAGGTGGGAGAACTGAAGGATGACGACTTTGAGA	CTTGAGGCCTTTCTTACCCAGAAGCAGAA-GGTGGGAGAACTGAAGGATGACGACTTTGAGA	var212	9CT19A-32	1	1	0	10	30	-	30		62
CTTGAGGCCCTTCTTACCCAGAAGCAGAAGGTGGGAGAACTGAAGGATGACGACTTTGAGAA	CTTGAGGCCTTTCTTACCCAGAAGCAGAAGGTGGGAGAACTGAAGGATGACGACTTTGAGAA	var44	9CT52	1	0	0	10	-	-			62
CTTGAGGCCGTTCTTACCCAGAAGCAGAAGGTGGGAGAACTGAAGGATGACGACTTTGAGAA	CTTGAGGCCTTTCTTACCCAGAAGCAGAAGGTGGGAGAACTGAAGGATGACGACTTTGAGAA	var1223	9GT52	1	0	0	10	-	-			62
CTTGAGGCCTATCTTACCCAGAAGCAGAAGGTGGGAGAACTGAAGGATGACGACTTTGAGAA	CTTGAGGCCTTTCTTACCCAGAAGCAGAAGGTGGGAGAACTGAAGGATGACGACTTTGAGAA	var891	10AT51	1	0	0	11	-	-			62
CTTGAGGCCTCTCTTACCCAG---------GTGGGAGAACTGAAGGATGACGACTTTGAGAA	CTTGAGGCCTTTCTTACCCAGAAGCAGAAGGTGGGAGAACTGAAGGATGACGACTTTGAGAA	var1131	10CT10-A-A-G-C-A-G-A-A-G32	1	0	9	11	-	22,23,24,25,26,27,28,29,30		22	62
CTTGAGGCCTCTCTTACCCAGA------AGGTGGGAGAACTGAAGGATGACGACTTTGAGAA	CTTGAGGCCTTTCTTACCCAGAAGCAGAAGGTGGGAGAACTGAAGGATGACGACTTTGAGAA	var1129	10CT11-A-G-C-A-G-A34	1	0	6	11	-	23,24,25,26,27,28		23	62
CTTGAGGCCTCTCTTACCCAGAAGCAG---GTGGGAGAACTGAAGGATGACGACTTTGAGAA	CTTGAGGCCTTTCTTACCCAGAAGCAGAAGGTGGGAGAACTGAAGGATGACGACTTTGAGAA	var409	10CT16-A-A-G32	1	0	3	11	-	28,29,30		28	62
CTTGAGGCCTCTCTTACCCAGAAGCAGA--------GAACTGAAGGATGACGACTTTGAGAA	CTTGAGGCCTTTCTTACCCAGAAGCAGAAGGTGGGAGAACTGAAGGATGACGACTTTGAGAA	var1443	10CT17-A-G-G-T-G-G-G-A26	1	0	8	11	-	29,30,31,32,33,34,35,36		29	62
CTTGAGGCCTCTCTTACCCAGAAGCAGA-GGTGGGAGAACTGAAGGATGACGACTTTGAGAA	CTTGAGGCCTTTCTTACCCAGAAGCAGAAGGTGGGAGAACTGAAGGATGACGACTTTGAGAA	var933	10CT17-A33	1	0	1	11	-	29		29	62
CTTGAGGCCTCTCTTACCCAGAAGCAGAA----------CTGAAGGATGACGACTTTGAGAA	CTTGAGGCCTTTCTTACCCAGAAGCAGAAGGTGGGAGAACTGAAGGATGACGACTTTGAGAA	var786	10CT18-G-G-T-G-G-G-A-G-A-A23	1	0	10	11	-	30,31,32,33,34,35,36,37,38,39		30	62
CTTGAGGCCTCTCTTACCCAGAAGCAGAAAGGTGGGAGAACTGAAGGATGACGACTTTGAGA	CTTGAGGCCTTTCTTACCCAGAAGCAGAA-GGTGGGAGAACTGAAGGATGACGACTTTGAGA	var316	10CT18A-32	1	1	0	11	30	-	30		62
CTTGAGGCCTCTCTTACCCAGAAGCAGAAGGTGGGAGAACTGAAGGATGACGACTTTGAGAA	CTTGAGGCCTTTCTTACCCAGAAGCAGAAGGTGGGAGAACTGAAGGATGACGACTTTGAGAA	var70	10CT51	1	0	0	11	-	-			62
CTTGAGGCCTT	CTTGAGGCCTT	var1134	11	0	0	51	-	-	12,13,14,15,16,17,18,19,20,21,22,23,24,25,26,27,28,29,30,31,32,33,34,35,36,37,38,39,40,41,42,43,44,45,46,47,48,49,50,51,52,53,54,55,56,57,58,59,60,61,62	-	12	11
CTTGAGGCCTT	CTTGAGGCCTT	var1224	11	0	0	51	-	-	12,13,14,15,16,17,18,19,20,21,22,23,24,25,26,27,28,29,30,31,32,33,34,35,36,37,38,39,40,41,42,43,44,45,46,47,48,49,50,51,52,53,54,55,56,57,58,59,60,61,62	-	12	11
CTTGAGGCCTT	CTTGAGGCCTT	var144	11	0	0	51	-	-	12,13,14,15,16,17,18,19,20,21,22,23,24,25,26,27,28,29,30,31,32,33,34,35,36,37,38,39,40,41,42,43,44,45,46,47,48,49,50,51,52,53,54,55,56,57,58,59,60,61,62	-	12	11
CTTGAGGCCTT	CTTGAGGCCTT	var145	11	0	0	51	-	-	12,13,14,15,16,17,18,19,20,21,22,23,24,25,26,27,28,29,30,31,32,33,34,35,36,37,38,39,40,41,42,43,44,45,46,47,48,49,50,51,52,53,54,55,56,57,58,59,60,61,62	-	12	11
CTTGAGGCCTT	CTTGAGGCCTT	var152	11	0	0	51	-	-	12,13,14,15,16,17,18,19,20,21,22,23,24,25,26,27,28,29,30,31,32,33,34,35,36,37,38,39,40,41,42,43,44,45,46,47,48,49,50,51,52,53,54,55,56,57,58,59,60,61,62	-	12	11
CTTGAGGCCTT	CTTGAGGCCTT	var1526	11	0	0	51	-	-	12,13,14,15,16,17,18,19,20,21,22,23,24,25,26,27,28,29,30,31,32,33,34,35,36,37,38,39,40,41,42,43,44,45,46,47,48,49,50,51,52,53,54,55,56,57,58,59,60,61,62	-	12	11
CTTGAGGCCTT	CTTGAGGCCTT	var1551	11	0	0	51	-	-	12,13,14,15,16,17,18,19,20,21,22,23,24,25,26,27,28,29,30,31,32,33,34,35,36,37,38,39,40,41,42,43,44,45,46,47,48,49,50,51,52,53,54,55,56,57,58,59,60,61,62	-	12	11
CTTGAGGCCTT	CTTGAGGCCTT	var1589	11	0	0	51	-	-	12,13,14,15,16,17,18,19,20,21,22,23,24,25,26,27,28,29,30,31,32,33,34,35,36,37,38,39,40,41,42,43,44,45,46,47,48,49,50,51,52,53,54,55,56,57,58,59,60,61,62	-	12	11
CTTGAGGCCTT	CTTGAGGCCTT	var162	11	0	0	51	-	-	12,13,14,15,16,17,18,19,20,21,22,23,24,25,26,27,28,29,30,31,32,33,34,35,36,37,38,39,40,41,42,43,44,45,46,47,48,49,50,51,52,53,54,55,56,57,58,59,60,61,62	-	12	11
CTTGAGGCCTT	CTTGAGGCCTT	var204	11	0	0	51	-	-	12,13,14,15,16,17,18,19,20,21,22,23,24,25,26,27,28,29,30,31,32,33,34,35,36,37,38,39,40,41,42,43,44,45,46,47,48,49,50,51,52,53,54,55,56,57,58,59,60,61,62	-	12	11
CTTGAGGCCTT	CTTGAGGCCTT	var312	11	0	0	51	-	-	12,13,14,15,16,17,18,19,20,21,22,23,24,25,26,27,28,29,30,31,32,33,34,35,36,37,38,39,40,41,42,43,44,45,46,47,48,49,50,51,52,53,54,55,56,57,58,59,60,61,62	-	12	11
CTTGAGGCCTT	CTTGAGGCCTT	var389	11	0	0	51	-	-	12,13,14,15,16,17,18,19,20,21,22,23,24,25,26,27,28,29,30,31,32,33,34,35,36,37,38,39,40,41,42,43,44,45,46,47,48,49,50,51,52,53,54,55,56,57,58,59,60,61,62	-	12	11
CTTGAGGCCTT	CTTGAGGCCTT	var393	11	0	0	51	-	-	12,13,14,15,16,17,18,19,20,21,22,23,24,25,26,27,28,29,30,31,32,33,34,35,36,37,38,39,40,41,42,43,44,45,46,47,48,49,50,51,52,53,54,55,56,57,58,59,60,61,62	-	12	11
CTTGAGGCCTT	CTTGAGGCCTT	var501	11	0	0	51	-	-	12,13,14,15,16,17,18,19,20,21,22,23,24,25,26,27,28,29,30,31,32,33,34,35,36,37,38,39,40,41,42,43,44,45,46,47,48,49,50,51,52,53,54,55,56,57,58,59,60,61,62	-	12	11
CTTGAGGCCTT	CTTGAGGCCTT	var512	11	0	0	51	-	-	12,13,14,15,16,17,18,19,20,21,22,23,24,25,26,27,28,29,30,31,32,33,34,35,36,37,38,39,40,41,42,43,44,45,46,47,48,49,50,51,52,53,54,55,56,57,58,59,60,61,62	-	12	11
CTTGAGGCCTT	CTTGAGGCCTT	var523	11	0	0	51	-	-	12,13,14,15,16,17,18,19,20,21,22,23,24,25,26,27,28,29,30,31,32,33,34,35,36,37,38,39,40,41,42,43,44,45,46,47,48,49,50,51,52,53,54,55,56,57,58,59,60,61,62	-	12	11
CTTGAGGCCTT	CTTGAGGCCTT	var547	11	0	0	51	-	-	12,13,14,15,16,17,18,19,20,21,22,23,24,25,26,27,28,29,30,31,32,33,34,35,36,37,38,39,40,41,42,43,44,45,46,47,48,49,50,51,52,53,54,55,56,57,58,59,60,61,62	-	12	11
CTTGAGGCCTT-CTTACC-AGTT-CTCCAGGTGGGAGAACTGAAGGATGACGACTTTGAGAA	CTTGAGGCCTTTCTTACCCAGAAGCAGAAGGTGGGAGAACTGAAGGATGACGACTTTGAGAA	var1266	11-T6-C2TATA-G1TACGCA34	5	0	3	22,23,24,25,26	-	12,19,24		12	62
CTTGAGGCCTTACT	CTTGAGGCCTTTCT	var183	11AT2	1	0	0	12	-	-			14
CTTGAGGCCTTACTTACCCAGAAGCAGAAAGGTGGGAGAACTGAAGGATGACGACTTTGAGA	CTTGAGGCCTTTCTTACCCAGAAGCAGAA-GGTGGGAGAACTGAAGGATGACGACTTTGAGA	var1338	11AT17A-32	1	1	0	12	30	-	30		62
CTTGAGGCCTTACTTACCCAGAAGCAGAAGGTGGGAGAACTGAAGGATGACGACTTTGAGAA	CTTGAGGCCTTTCTTACCCAGAAGCAGAAGGTGGGAGAACTGAAGGATGACGACTTTGAGAA	var507	11AT50	1	0	0	12	-	-			62
CTTGAGGCCTTCCTTACCCAG---------GTGGGAGAACTGAAGGATGACGACTTTGAGAA	CTTGAGGCCTTTCTTACCCAGAAGCAGAAGGTGGGAGAACTGAAGGATGACGACTTTGAGAA	var1633	11CT9-A-A-G-C-A-G-A-A-G32	1	0	9	12	-	22,23,24,25,26,27,28,29,30		22	62
CTTGAGGCCTTCCTTACCCAGA------AGGTGGGAGAACTGAAGGATGACGACTTTGAGAA	CTTGAGGCCTTTCTTACCCAGAAGCAGAAGGTGGGAGAACTGAAGGATGACGACTTTGAGAA	var856	11CT10-A-G-C-A-G-A34	1	0	6	12	-	23,24,25,26,27,28		23	62
CTTGAGGCCTTCCTTACCCAGAA	CTTGAGGCCTTTCTTACCCAGAA	var1512	11CT11	1	0	0	12	-	-			23
CTTGAGGCCTTCCTTACCCAGAAGCAG---GTGGGAGAACTGAAGGATGACGACTTTGAGAA	CTTGAGGCCTTTCTTACCCAGAAGCAGAAGGTGGGAGAACTGAAGGATGACGACTTTGAGAA	var235	11CT15-A-A-G32	1	0	3	12	-	28,29,30		28	62
CTTGAGGCCTTCCTTACCCAGAAGCAGA--------GAACTGAAGGATGACGACTTTGAGAA	CTTGAGGCCTTTCTTACCCAGAAGCAGAAGGTGGGAGAACTGAAGGATGACGACTTTGAGAA	var1599	11CT16-A-G-G-T-G-G-G-A26	1	0	8	12	-	29,30,31,32,33,34,35,36		29	62
CTTGAGGCCTTCCTTACCCAGAAGCAGA-GGTGGGAGAACTGAAGGATGACGACTTTGAGAA	CTTGAGGCCTTTCTTACCCAGAAGCAGAAGGTGGGAGAACTGAAGGATGACGACTTTGAGAA	var485	11CT16-A33	1	0	1	12	-	29		29	62
CTTGAGGCCTTCCTTACCCAGAAGCAGAA----------CTGAAGGATGACGACTTTGAGAA	CTTGAGGCCTTTCTTACCCAGAAGCAGAAGGTGGGAGAACTGAAGGATGACGACTTTGAGAA	var712	11CT17-G-G-T-G-G-G-A-G-A-A23	1	0	10	12	-	30,31,32,33,34,35,36,37,38,39		30	62
CTTGAGGCCTTCCTTACCCAGAAGCAGAAAGGTGGGAGAACTGAAGGATGACGACTTTGAGA	CTTGAGGCCTTTCTTACCCAGAAGCAGAA-GGTGGGAGAACTGAAGGATGACGACTTTGAGA	var189	11CT17A-32	1	1	0	12	30	-	30		62
CTTGAGGCCTTCCTTACCCAGAAGCAGAAGGTGGGAGAACTGAAGGATGACGACTTTGAGAA	CTTGAGGCCTTTCTTACCCAGAAGCAGAAGGTGGGAGAACTGAAGGATGACGACTTTGAGAA	var53	11CT50	1	0	0	12	-	-			62
CTTGAGGCCTTCCTTTCTTAC---CAGAAGGTGGGAGAACTGAAGGATGACGACTTTGAGAA	CTTGAGGCCTTTCTTACCCAGAAGCAGAAGGTGGGAGAACTGAAGGATGACGACTTTGAGAA	var1064	11CT3TA1TCTC1CG-A-A-G38	5	0	3	12,16,18,19,21	-	22,23,24		22	62
CTTGAGGCCTTGCTTACCCAGAAGCAGAAGGTGGGAGAACTGAAGGATGACGACTTTGAGAA	CTTGAGGCCTTTCTTACCCAGAAGCAGAAGGTGGGAGAACTGAAGGATGACGACTTTGAGAA	var1248	11GT50	1	0	0	12	-	-			62
CTTGAGGCCTTT	CTTGAGGCCTTT	var1216	12	0	0	50	-	-	13,14,15,16,17,18,19,20,21,22,23,24,25,26,27,28,29,30,31,32,33,34,35,36,37,38,39,40,41,42,43,44,45,46,47,48,49,50,51,52,53,54,55,56,57,58,59,60,61,62	-	13	12
CTTGAGGCCTTT	CTTGAGGCCTTT	var1488	12	0	0	50	-	-	13,14,15,16,17,18,19,20,21,22,23,24,25,26,27,28,29,30,31,32,33,34,35,36,37,38,39,40,41,42,43,44,45,46,47,48,49,50,51,52,53,54,55,56,57,58,59,60,61,62	-	13	12
CTTGAGGCCTTT	CTTGAGGCCTTT	var1489	12	0	0	50	-	-	13,14,15,16,17,18,19,20,21,22,23,24,25,26,27,28,29,30,31,32,33,34,35,36,37,38,39,40,41,42,43,44,45,46,47,48,49,50,51,52,53,54,55,56,57,58,59,60,61,62	-	13	12
CTTGAGGCCTTT	CTTGAGGCCTTT	var178	12	0	0	50	-	-	13,14,15,16,17,18,19,20,21,22,23,24,25,26,27,28,29,30,31,32,33,34,35,36,37,38,39,40,41,42,43,44,45,46,47,48,49,50,51,52,53,54,55,56,57,58,59,60,61,62	-	13	12
CTTGAGGCCTTT	CTTGAGGCCTTT	var245	12	0	0	50	-	-	13,14,15,16,17,18,19,20,21,22,23,24,25,26,27,28,29,30,31,32,33,34,35,36,37,38,39,40,41,42,43,44,45,46,47,48,49,50,51,52,53,54,55,56,57,58,59,60,61,62	-	13	12
CTTGAGGCCTTT	CTTGAGGCCTTT	var327	12	0	0	50	-	-	13,14,15,16,17,18,19,20,21,22,23,24,25,26,27,28,29,30,31,32,33,34,35,36,37,38,39,40,41,42,43,44,45,46,47,48,49,50,51,52,53,54,55,56,57,58,59,60,61,62	-	13	12
CTTGAGGCCTTT	CTTGAGGCCTTT	var354	12	0	0	50	-	-	13,14,15,16,17,18,19,20,21,22,23,24,25,26,27,28,29,30,31,32,33,34,35,36,37,38,39,40,41,42,43,44,45,46,47,48,49,50,51,52,53,54,55,56,57,58,59,60,61,62	-	13	12
CTTGAGGCCTTT	CTTGAGGCCTTT	var361	12	0	0	50	-	-	13,14,15,16,17,18,19,20,21,22,23,24,25,26,27,28,29,30,31,32,33,34,35,36,37,38,39,40,41,42,43,44,45,46,47,48,49,50,51,52,53,54,55,56,57,58,59,60,61,62	-	13	12
CTTGAGGCCTTT	CTTGAGGCCTTT	var380	12	0	0	50	-	-	13,14,15,16,17,18,19,20,21,22,23,24,25,26,27,28,29,30,31,32,33,34,35,36,37,38,39,40,41,42,43,44,45,46,47,48,49,50,51,52,53,54,55,56,57,58,59,60,61,62	-	13	12
CTTGAGGCCTTT	CTTGAGGCCTTT	var401	12	0	0	50	-	-	13,14,15,16,17,18,19,20,21,22,23,24,25,26,27,28,29,30,31,32,33,34,35,36,37,38,39,40,41,42,43,44,45,46,47,48,49,50,51,52,53,54,55,56,57,58,59,60,61,62	-	13	12
CTTGAGGCCTTT	CTTGAGGCCTTT	var452	12	0	0	50	-	-	13,14,15,16,17,18,19,20,21,22,23,24,25,26,27,28,29,30,31,32,33,34,35,36,37,38,39,40,41,42,43,44,45,46,47,48,49,50,51,52,53,54,55,56,57,58,59,60,61,62	-	13	12
CTTGAGGCCTTT	CTTGAGGCCTTT	var464	12	0	0	50	-	-	13,14,15,16,17,18,19,20,21,22,23,24,25,26,27,28,29,30,31,32,33,34,35,36,37,38,39,40,41,42,43,44,45,46,47,48,49,50,51,52,53,54,55,56,57,58,59,60,61,62	-	13	12
CTTGAGGCCTTT	CTTGAGGCCTTT	var489	12	0	0	50	-	-	13,14,15,16,17,18,19,20,21,22,23,24,25,26,27,28,29,30,31,32,33,34,35,36,37,38,39,40,41,42,43,44,45,46,47,48,49,50,51,52,53,54,55,56,57,58,59,60,61,62	-	13	12
CTTGAGGCCTTT	CTTGAGGCCTTT	var510	12	0	0	50	-	-	13,14,15,16,17,18,19,20,21,22,23,24,25,26,27,28,29,30,31,32,33,34,35,36,37,38,39,40,41,42,43,44,45,46,47,48,49,50,51,52,53,54,55,56,57,58,59,60,61,62	-	13	12
CTTGAGGCCTTT	CTTGAGGCCTTT	var527	12	0	0	50	-	-	13,14,15,16,17,18,19,20,21,22,23,24,25,26,27,28,29,30,31,32,33,34,35,36,37,38,39,40,41,42,43,44,45,46,47,48,49,50,51,52,53,54,55,56,57,58,59,60,61,62	-	13	12
CTTGAGGCCTTT	CTTGAGGCCTTT	var552	12	0	0	50	-	-	13,14,15,16,17,18,19,20,21,22,23,24,25,26,27,28,29,30,31,32,33,34,35,36,37,38,39,40,41,42,43,44,45,46,47,48,49,50,51,52,53,54,55,56,57,58,59,60,61,62	-	13	12
CTTGAGGCCTTT	CTTGAGGCCTTT	var611	12	0	0	50	-	-	13,14,15,16,17,18,19,20,21,22,23,24,25,26,27,28,29,30,31,32,33,34,35,36,37,38,39,40,41,42,43,44,45,46,47,48,49,50,51,52,53,54,55,56,57,58,59,60,61,62	-	13	12
CTTGAGGCCTTT	CTTGAGGCCTTT	var948	12	0	0	50	-	-	13,14,15,16,17,18,19,20,21,22,23,24,25,26,27,28,29,30,31,32,33,34,35,36,37,38,39,40,41,42,43,44,45,46,47,48,49,50,51,52,53,54,55,56,57,58,59,60,61,62	-	13	12
CTTGAGGCCTTTATTACCCAGAAGCAGAAGGTGGGAGAACTGAAGGATGACGACTTTGAGAA	CTTGAGGCCTTTCTTACCCAGAAGCAGAAGGTGGGAGAACTGAAGGATGACGACTTTGAGAA	var777	12AC49	1	0	0	13	-	-			62
CTTGAGGCCTTTC	CTTGAGGCCTTTC	var1000	13	0	0	49	-	-	14,15,16,17,18,19,20,21,22,23,24,25,26,27,28,29,30,31,32,33,34,35,36,37,38,39,40,41,42,43,44,45,46,47,48,49,50,51,52,53,54,55,56,57,58,59,60,61,62	-	14	13
CTTGAGGCCTTTC	CTTGAGGCCTTTC	var1211	13	0	0	49	-	-	14,15,16,17,18,19,20,21,22,23,24,25,26,27,28,29,30,31,32,33,34,35,36,37,38,39,40,41,42,43,44,45,46,47,48,49,50,51,52,53,54,55,56,57,58,59,60,61,62	-	14	13
CTTGAGGCCTTTC	CTTGAGGCCTTTC	var1550	13	0	0	49	-	-	14,15,16,17,18,19,20,21,22,23,24,25,26,27,28,29,30,31,32,33,34,35,36,37,38,39,40,41,42,43,44,45,46,47,48,49,50,51,52,53,54,55,56,57,58,59,60,61,62	-	14	13
CTTGAGGCCTTTC	CTTGAGGCCTTTC	var1587	13	0	0	49	-	-	14,15,16,17,18,19,20,21,22,23,24,25,26,27,28,29,30,31,32,33,34,35,36,37,38,39,40,41,42,43,44,45,46,47,48,49,50,51,52,53,54,55,56,57,58,59,60,61,62	-	14	13
CTTGAGGCCTTTC	CTTGAGGCCTTTC	var273	13	0	0	49	-	-	14,15,16,17,18,19,20,21,22,23,24,25,26,27,28,29,30,31,32,33,34,35,36,37,38,39,40,41,42,43,44,45,46,47,48,49,50,51,52,53,54,55,56,57,58,59,60,61,62	-	14	13
CTTGAGGCCTTTC	CTTGAGGCCTTTC	var313	13	0	0	49	-	-	14,15,16,17,18,19,20,21,22,23,24,25,26,27,28,29,30,31,32,33,34,35,36,37,38,39,40,41,42,43,44,45,46,47,48,49,50,51,52,53,54,55,56,57,58,59,60,61,62	-	14	13
CTTGAGGCCTTTC	CTTGAGGCCTTTC	var642	13	0	0	49	-	-	14,15,16,17,18,19,20,21,22,23,24,25,26,27,28,29,30,31,32,33,34,35,36,37,38,39,40,41,42,43,44,45,46,47,48,49,50,51,52,53,54,55,56,57,58,59,60,61,62	-	14	13
CTTGAGGCCTTTC	CTTGAGGCCTTTC	var660	13	0	0	49	-	-	14,15,16,17,18,19,20,21,22,23,24,25,26,27,28,29,30,31,32,33,34,35,36,37,38,39,40,41,42,43,44,45,46,47,48,49,50,51,52,53,54,55,56,57,58,59,60,61,62	-	14	13
CTTGAGGCCTTTC	CTTGAGGCCTTTC	var686	13	0	0	49	-	-	14,15,16,17,18,19,20,21,22,23,24,25,26,27,28,29,30,31,32,33,34,35,36,37,38,39,40,41,42,43,44,45,46,47,48,49,50,51,52,53,54,55,56,57,58,59,60,61,62	-	14	13
CTTGAGGCCTTTC	CTTGAGGCCTTTC	var77	13	0	0	49	-	-	14,15,16,17,18,19,20,21,22,23,24,25,26,27,28,29,30,31,32,33,34,35,36,37,38,39,40,41,42,43,44,45,46,47,48,49,50,51,52,53,54,55,56,57,58,59,60,61,62	-	14	13
CTTGAGGCCTTTC	CTTGAGGCCTTTC	var775	13	0	0	49	-	-	14,15,16,17,18,19,20,21,22,23,24,25,26,27,28,29,30,31,32,33,34,35,36,37,38,39,40,41,42,43,44,45,46,47,48,49,50,51,52,53,54,55,56,57,58,59,60,61,62	-	14	13
CTTGAGGCCTTTC	CTTGAGGCCTTTC	var947	13	0	0	49	-	-	14,15,16,17,18,19,20,21,22,23,24,25,26,27,28,29,30,31,32,33,34,35,36,37,38,39,40,41,42,43,44,45,46,47,48,49,50,51,52,53,54,55,56,57,58,59,60,61,62	-	14	13
CTTGAGGCCTTTCATACCCAGAAGCAG---GTGGGAGAACTGAAGGATGACGACTTTGAGAA	CTTGAGGCCTTTCTTACCCAGAAGCAGAAGGTGGGAGAACTGAAGGATGACGACTTTGAGAA	var1472	13AT13-A-A-G32	1	0	3	14	-	28,29,30		28	62
CTTGAGGCCTTTCATACCCAGAAGCAGAAAGGTGGGAGAACTGAAGGATGACGACTTTGAGA	CTTGAGGCCTTTCTTACCCAGAAGCAGAA-GGTGGGAGAACTGAAGGATGACGACTTTGAGA	var1376	13AT15A-32	1	1	0	14	30	-	30		62
CTTGAGGCCTTTCATACCCAGAAGCAGAAGGTGGGAGAACTGAAGGATGACGACTTTGAGAA	CTTGAGGCCTTTCTTACCCAGAAGCAGAAGGTGGGAGAACTGAAGGATGACGACTTTGAGAA	var379	13AT48	1	0	0	14	-	-			62
CTTGAGGCCTTTCCCACCCAGA------AGGTGGGAGAACTGAAGGATGACGACTTTGAGAA	CTTGAGGCCTTTCTTACCCAGAAGCAGAAGGTGGGAGAACTGAAGGATGACGACTTTGAGAA	var505	13CTCT7-A-G-C-A-G-A34	2	0	6	14,15	-	23,24,25,26,27,28		23	62
CTTGAGGCCTTTCCTACCCAGA------AGGTGGGAGAACTGAAGGATGACGACTTTGAGAA	CTTGAGGCCTTTCTTACCCAGAAGCAGAAGGTGGGAGAACTGAAGGATGACGACTTTGAGAA	var960	13CT8-A-G-C-A-G-A34	1	0	6	14	-	23,24,25,26,27,28		23	62
CTTGAGGCCTTTCCTACCCAGAA	CTTGAGGCCTTTCTTACCCAGAA	var1373	13CT9	1	0	0	14	-	-			23
CTTGAGGCCTTTCCTACCCAGAAGCAG---GTGGGAGAACTGAAGGATGACGACTTTGAGAA	CTTGAGGCCTTTCTTACCCAGAAGCAGAAGGTGGGAGAACTGAAGGATGACGACTTTGAGAA	var383	13CT13-A-A-G32	1	0	3	14	-	28,29,30		28	62
CTTGAGGCCTTTCCTACCCAGAAGCAGA-GGTGGGAGAACTGAAGGATGACGACTTTGAGAA	CTTGAGGCCTTTCTTACCCAGAAGCAGAAGGTGGGAGAACTGAAGGATGACGACTTTGAGAA	var995	13CT14-A33	1	0	1	14	-	29		29	62
CTTGAGGCCTTTCCTACCCAGAAGCAGAA----------CTGAAGGATGACGACTTTGAGAA	CTTGAGGCCTTTCTTACCCAGAAGCAGAAGGTGGGAGAACTGAAGGATGACGACTTTGAGAA	var837	13CT15-G-G-T-G-G-G-A-G-A-A23	1	0	10	14	-	30,31,32,33,34,35,36,37,38,39		30	62
CTTGAGGCCTTTCCTACCCAGAAGCAGAAAGGTGGGAGAACTGAAGGATGACGACTTTGAGA	CTTGAGGCCTTTCTTACCCAGAAGCAGAA-GGTGGGAGAACTGAAGGATGACGACTTTGAGA	var360	13CT15A-32	1	1	0	14	30	-	30		62
CTTGAGGCCTTTCCTACCCAGAAGCAGAAGGTGGGAGAACTGAAGGATGACGACTTTGAGAA	CTTGAGGCCTTTCTTACCCAGAAGCAGAAGGTGGGAGAACTGAAGGATGACGACTTTGAGAA	var82	13CT48	1	0	0	14	-	-			62
CTTGAGGCCTTTCGTACCCAGAAGCAGAAGGTGGGAGAACTGAAGGATGACGACTTTGAGAA	CTTGAGGCCTTTCTTACCCAGAAGCAGAAGGTGGGAGAACTGAAGGATGACGACTTTGAGAA	var1052	13GT48	1	0	0	14	-	-			62
CTTGAGGCCTTTCT	CTTGAGGCCTTTCT	var1122	14	0	0	48	-	-	15,16,17,18,19,20,21,22,23,24,25,26,27,28,29,30,31,32,33,34,35,36,37,38,39,40,41,42,43,44,45,46,47,48,49,50,51,52,53,54,55,56,57,58,59,60,61,62	-	15	14
CTTGAGGCCTTTCT	CTTGAGGCCTTTCT	var1203	14	0	0	48	-	-	15,16,17,18,19,20,21,22,23,24,25,26,27,28,29,30,31,32,33,34,35,36,37,38,39,40,41,42,43,44,45,46,47,48,49,50,51,52,53,54,55,56,57,58,59,60,61,62	-	15	14
CTTGAGGCCTTTCT	CTTGAGGCCTTTCT	var160	14	0	0	48	-	-	15,16,17,18,19,20,21,22,23,24,25,26,27,28,29,30,31,32,33,34,35,36,37,38,39,40,41,42,43,44,45,46,47,48,49,50,51,52,53,54,55,56,57,58,59,60,61,62	-	15	14
CTTGAGGCCTTTCT	CTTGAGGCCTTTCT	var163	14	0	0	48	-	-	15,16,17,18,19,20,21,22,23,24,25,26,27,28,29,30,31,32,33,34,35,36,37,38,39,40,41,42,43,44,45,46,47,48,49,50,51,52,53,54,55,56,57,58,59,60,61,62	-	15	14
CTTGAGGCCTTTCT	CTTGAGGCCTTTCT	var272	14	0	0	48	-	-	15,16,17,18,19,20,21,22,23,24,25,26,27,28,29,30,31,32,33,34,35,36,37,38,39,40,41,42,43,44,45,46,47,48,49,50,51,52,53,54,55,56,57,58,59,60,61,62	-	15	14
CTTGAGGCCTTTCT	CTTGAGGCCTTTCT	var32	14	0	0	48	-	-	15,16,17,18,19,20,21,22,23,24,25,26,27,28,29,30,31,32,33,34,35,36,37,38,39,40,41,42,43,44,45,46,47,48,49,50,51,52,53,54,55,56,57,58,59,60,61,62	-	15	14
CTTGAGGCCTTTCT	CTTGAGGCCTTTCT	var446	14	0	0	48	-	-	15,16,17,18,19,20,21,22,23,24,25,26,27,28,29,30,31,32,33,34,35,36,37,38,39,40,41,42,43,44,45,46,47,48,49,50,51,52,53,54,55,56,57,58,59,60,61,62	-	15	14
CTTGAGGCCTTTCT	CTTGAGGCCTTTCT	var632	14	0	0	48	-	-	15,16,17,18,19,20,21,22,23,24,25,26,27,28,29,30,31,32,33,34,35,36,37,38,39,40,41,42,43,44,45,46,47,48,49,50,51,52,53,54,55,56,57,58,59,60,61,62	-	15	14
CTTGAGGCCTTTCT	CTTGAGGCCTTTCT	var647	14	0	0	48	-	-	15,16,17,18,19,20,21,22,23,24,25,26,27,28,29,30,31,32,33,34,35,36,37,38,39,40,41,42,43,44,45,46,47,48,49,50,51,52,53,54,55,56,57,58,59,60,61,62	-	15	14
CTTGAGGCCTTTCT	CTTGAGGCCTTTCT	var653	14	0	0	48	-	-	15,16,17,18,19,20,21,22,23,24,25,26,27,28,29,30,31,32,33,34,35,36,37,38,39,40,41,42,43,44,45,46,47,48,49,50,51,52,53,54,55,56,57,58,59,60,61,62	-	15	14
CTTGAGGCCTTTCT	CTTGAGGCCTTTCT	var671	14	0	0	48	-	-	15,16,17,18,19,20,21,22,23,24,25,26,27,28,29,30,31,32,33,34,35,36,37,38,39,40,41,42,43,44,45,46,47,48,49,50,51,52,53,54,55,56,57,58,59,60,61,62	-	15	14
CTTGAGGCCTTTCT	CTTGAGGCCTTTCT	var884	14	0	0	48	-	-	15,16,17,18,19,20,21,22,23,24,25,26,27,28,29,30,31,32,33,34,35,36,37,38,39,40,41,42,43,44,45,46,47,48,49,50,51,52,53,54,55,56,57,58,59,60,61,62	-	15	14
CTTGAGGCCTTTCT	CTTGAGGCCTTTCT	var923	14	0	0	48	-	-	15,16,17,18,19,20,21,22,23,24,25,26,27,28,29,30,31,32,33,34,35,36,37,38,39,40,41,42,43,44,45,46,47,48,49,50,51,52,53,54,55,56,57,58,59,60,61,62	-	15	14
CTTGAGGCCTTTCT-ACCCAGAAGCAGAAGGTGGGAGAACTGAAGGATGACGACTTTGAGAA	CTTGAGGCCTTTCTTACCCAGAAGCAGAAGGTGGGAGAACTGAAGGATGACGACTTTGAGAA	var699	14-T47	0	0	1	-	-	15		15	62
CTTGAGGCCTTTCTAAC	CTTGAGGCCTTTCTTAC	var378	14AT2	1	0	0	15	-	-			17
CTTGAGGCCTTTCTAACCCAGAAGCAGAAGGTGGGAGAACTGAAGGATGACGACTTTGAGAA	CTTGAGGCCTTTCTTACCCAGAAGCAGAAGGTGGGAGAACTGAAGGATGACGACTTTGAGAA	var665	14AT47	1	0	0	15	-	-			62
CTTGAGGCCTTTCTCACCCAGA------AGGTGGGAGAACTGAAGGATGACGACTTTGAGAA	CTTGAGGCCTTTCTTACCCAGAAGCAGAAGGTGGGAGAACTGAAGGATGACGACTTTGAGAA	var1258	14CT7-A-G-C-A-G-A34	1	0	6	15	-	23,24,25,26,27,28		23	62
CTTGAGGCCTTTCTCACCCAGAA	CTTGAGGCCTTTCTTACCCAGAA	var1066	14CT8	1	0	0	15	-	-			23
CTTGAGGCCTTTCTCACCCAGAAGCAG---GTGGGAGAACTGAAGGATGACGACTTTGAGAA	CTTGAGGCCTTTCTTACCCAGAAGCAGAAGGTGGGAGAACTGAAGGATGACGACTTTGAGAA	var449	14CT12-A-A-G32	1	0	3	15	-	28,29,30		28	62
CTTGAGGCCTTTCTCACCCAGAAGCAGA-GGTGGGAGAACTGAAGGATGACGACTTTGAGAA	CTTGAGGCCTTTCTTACCCAGAAGCAGAAGGTGGGAGAACTGAAGGATGACGACTTTGAGAA	var1516	14CT13-A33	1	0	1	15	-	29		29	62
CTTGAGGCCTTTCTCACCCAGAAGCAGAA----------CTGAAGGATGACGACTTTGAGAA	CTTGAGGCCTTTCTTACCCAGAAGCAGAAGGTGGGAGAACTGAAGGATGACGACTTTGAGAA	var1102	14CT14-G-G-T-G-G-G-A-G-A-A23	1	0	10	15	-	30,31,32,33,34,35,36,37,38,39		30	62
CTTGAGGCCTTTCTCACCCAGAAGCAGAAAGGTGGGAGAACTGAAGGATGACGACTTTGAGA	CTTGAGGCCTTTCTTACCCAGAAGCAGAA-GGTGGGAGAACTGAAGGATGACGACTTTGAGA	var448	14CT14A-32	1	1	0	15	30	-	30		62
CTTGAGGCCTTTCTCACCCAGAAGCAGAAGGTGGGAGAACTGAAGGATGACGACTTTGAGAA	CTTGAGGCCTTTCTTACCCAGAAGCAGAAGGTGGGAGAACTGAAGGATGACGACTTTGAGAA	var110	14CT47	1	0	0	15	-	-			62
CTTGAGGCCTTTCTGAC	CTTGAGGCCTTTCTTAC	var1486	14GT2	1	0	0	15	-	-			17
CTTGAGGCCTTTCTGAC	CTTGAGGCCTTTCTTAC	var815	14GT2	1	0	0	15	-	-			17
CTTGAGGCCTTTCTGACCCAGAAGCAGAAGGTGGGAGAACTGAAGGATGACGACTTTGAGAA	CTTGAGGCCTTTCTTACCCAGAAGCAGAAGGTGGGAGAACTGAAGGATGACGACTTTGAGAA	var956	14GT47	1	0	0	15	-	-			62
CTTGAGGCCTTTCTT	CTTGAGGCCTTTCTT	var1038	15	0	0	47	-	-	16,17,18,19,20,21,22,23,24,25,26,27,28,29,30,31,32,33,34,35,36,37,38,39,40,41,42,43,44,45,46,47,48,49,50,51,52,53,54,55,56,57,58,59,60,61,62	-	16	15
CTTGAGGCCTTTCTT	CTTGAGGCCTTTCTT	var1307	15	0	0	47	-	-	16,17,18,19,20,21,22,23,24,25,26,27,28,29,30,31,32,33,34,35,36,37,38,39,40,41,42,43,44,45,46,47,48,49,50,51,52,53,54,55,56,57,58,59,60,61,62	-	16	15
CTTGAGGCCTTTCTT	CTTGAGGCCTTTCTT	var1348	15	0	0	47	-	-	16,17,18,19,20,21,22,23,24,25,26,27,28,29,30,31,32,33,34,35,36,37,38,39,40,41,42,43,44,45,46,47,48,49,50,51,52,53,54,55,56,57,58,59,60,61,62	-	16	15
CTTGAGGCCTTTCTT	CTTGAGGCCTTTCTT	var150	15	0	0	47	-	-	16,17,18,19,20,21,22,23,24,25,26,27,28,29,30,31,32,33,34,35,36,37,38,39,40,41,42,43,44,45,46,47,48,49,50,51,52,53,54,55,56,57,58,59,60,61,62	-	16	15
CTTGAGGCCTTTCTT	CTTGAGGCCTTTCTT	var1646	15	0	0	47	-	-	16,17,18,19,20,21,22,23,24,25,26,27,28,29,30,31,32,33,34,35,36,37,38,39,40,41,42,43,44,45,46,47,48,49,50,51,52,53,54,55,56,57,58,59,60,61,62	-	16	15
CTTGAGGCCTTTCTT	CTTGAGGCCTTTCTT	var226	15	0	0	47	-	-	16,17,18,19,20,21,22,23,24,25,26,27,28,29,30,31,32,33,34,35,36,37,38,39,40,41,42,43,44,45,46,47,48,49,50,51,52,53,54,55,56,57,58,59,60,61,62	-	16	15
CTTGAGGCCTTTCTT	CTTGAGGCCTTTCTT	var385	15	0	0	47	-	-	16,17,18,19,20,21,22,23,24,25,26,27,28,29,30,31,32,33,34,35,36,37,38,39,40,41,42,43,44,45,46,47,48,49,50,51,52,53,54,55,56,57,58,59,60,61,62	-	16	15
CTTGAGGCCTTTCTT	CTTGAGGCCTTTCTT	var423	15	0	0	47	-	-	16,17,18,19,20,21,22,23,24,25,26,27,28,29,30,31,32,33,34,35,36,37,38,39,40,41,42,43,44,45,46,47,48,49,50,51,52,53,54,55,56,57,58,59,60,61,62	-	16	15
CTTGAGGCCTTTCTT	CTTGAGGCCTTTCTT	var456	15	0	0	47	-	-	16,17,18,19,20,21,22,23,24,25,26,27,28,29,30,31,32,33,34,35,36,37,38,39,40,41,42,43,44,45,46,47,48,49,50,51,52,53,54,55,56,57,58,59,60,61,62	-	16	15
CTTGAGGCCTTTCTT	CTTGAGGCCTTTCTT	var778	15	0	0	47	-	-	16,17,18,19,20,21,22,23,24,25,26,27,28,29,30,31,32,33,34,35,36,37,38,39,40,41,42,43,44,45,46,47,48,49,50,51,52,53,54,55,56,57,58,59,60,61,62	-	16	15
CTTGAGGCCTTTCTT	CTTGAGGCCTTTCTT	var895	15	0	0	47	-	-	16,17,18,19,20,21,22,23,24,25,26,27,28,29,30,31,32,33,34,35,36,37,38,39,40,41,42,43,44,45,46,47,48,49,50,51,52,53,54,55,56,57,58,59,60,61,62	-	16	15
CTTGAGGCCTTTCTT-----------GAAGGTGGGAGAACTGAAGGATGACGACTTTGAGAA	CTTGAGGCCTTTCTTACCCAGAAGCAGAAGGTGGGAGAACTGAAGGATGACGACTTTGAGAA	var915	15-A-C-C-C-A-G-A-A-G-C-A36	0	0	11	-	-	16,17,18,19,20,21,22,23,24,25,26		16	62
CTTGAGGCCTTTCTT---CA-AAGAACT--GTGGGAGAACTGAAGGATGACGACTTTGAGAA	CTTGAGGCCTTTCTTACCCAGAAGCAGAAGGTGGGAGAACTGAAGGATGACGACTTTGAGAA	var1391	15-A-C-C2-G3AC1CGTA-A-G32	3	0	6	25,27,28	-	16,17,18,21,29,30		16	62
CTTGAGGCCTTTCTTA	CTTGAGGCCTTTCTTA	var101	16	0	0	46	-	-	17,18,19,20,21,22,23,24,25,26,27,28,29,30,31,32,33,34,35,36,37,38,39,40,41,42,43,44,45,46,47,48,49,50,51,52,53,54,55,56,57,58,59,60,61,62	-	17	16
CTTGAGGCCTTTCTTA	CTTGAGGCCTTTCTTA	var106	16	0	0	46	-	-	17,18,19,20,21,22,23,24,25,26,27,28,29,30,31,32,33,34,35,36,37,38,39,40,41,42,43,44,45,46,47,48,49,50,51,52,53,54,55,56,57,58,59,60,61,62	-	17	16
CTTGAGGCCTTTCTTA	CTTGAGGCCTTTCTTA	var1202	16	0	0	46	-	-	17,18,19,20,21,22,23,24,25,26,27,28,29,30,31,32,33,34,35,36,37,38,39,40,41,42,43,44,45,46,47,48,49,50,51,52,53,54,55,56,57,58,59,60,61,62	-	17	16
CTTGAGGCCTTTCTTA	CTTGAGGCCTTTCTTA	var191	16	0	0	46	-	-	17,18,19,20,21,22,23,24,25,26,27,28,29,30,31,32,33,34,35,36,37,38,39,40,41,42,43,44,45,46,47,48,49,50,51,52,53,54,55,56,57,58,59,60,61,62	-	17	16
CTTGAGGCCTTTCTTA	CTTGAGGCCTTTCTTA	var222	16	0	0	46	-	-	17,18,19,20,21,22,23,24,25,26,27,28,29,30,31,32,33,34,35,36,37,38,39,40,41,42,43,44,45,46,47,48,49,50,51,52,53,54,55,56,57,58,59,60,61,62	-	17	16
CTTGAGGCCTTTCTTA	CTTGAGGCCTTTCTTA	var364	16	0	0	46	-	-	17,18,19,20,21,22,23,24,25,26,27,28,29,30,31,32,33,34,35,36,37,38,39,40,41,42,43,44,45,46,47,48,49,50,51,52,53,54,55,56,57,58,59,60,61,62	-	17	16
CTTGAGGCCTTTCTTA	CTTGAGGCCTTTCTTA	var406	16	0	0	46	-	-	17,18,19,20,21,22,23,24,25,26,27,28,29,30,31,32,33,34,35,36,37,38,39,40,41,42,43,44,45,46,47,48,49,50,51,52,53,54,55,56,57,58,59,60,61,62	-	17	16
CTTGAGGCCTTTCTTA	CTTGAGGCCTTTCTTA	var728	16	0	0	46	-	-	17,18,19,20,21,22,23,24,25,26,27,28,29,30,31,32,33,34,35,36,37,38,39,40,41,42,43,44,45,46,47,48,49,50,51,52,53,54,55,56,57,58,59,60,61,62	-	17	16
CTTGAGGCCTTTCTTA	CTTGAGGCCTTTCTTA	var76	16	0	0	46	-	-	17,18,19,20,21,22,23,24,25,26,27,28,29,30,31,32,33,34,35,36,37,38,39,40,41,42,43,44,45,46,47,48,49,50,51,52,53,54,55,56,57,58,59,60,61,62	-	17	16
CTTGAGGCCTTTCTTA	CTTGAGGCCTTTCTTA	var914	16	0	0	46	-	-	17,18,19,20,21,22,23,24,25,26,27,28,29,30,31,32,33,34,35,36,37,38,39,40,41,42,43,44,45,46,47,48,49,50,51,52,53,54,55,56,57,58,59,60,61,62	-	17	16
CTTGAGGCCTTTCTTA------------AGGTGGGAGAACTGAAGGATGACGACTTTGAGAA	CTTGAGGCCTTTCTTACCCAGAAGCAGAAGGTGGGAGAACTGAAGGATGACGACTTTGAGAA	var139	16-C-C-C-A-G-A-A-G-C-A-G-A34	0	0	12	-	-	17,18,19,20,21,22,23,24,25,26,27,28		17	62
CTTGAGGCCTTTCTTA-----------AAGGTGGGAGAACTGAAGGATGACGACTTTGAGAA	CTTGAGGCCTTTCTTACCCAGAAGCAGAAGGTGGGAGAACTGAAGGATGACGACTTTGAGAA	var459	16-C-C-C-A-G-A-A-G-C-A-G35	0	0	11	-	-	17,18,19,20,21,22,23,24,25,26,27		17	62
CTTGAGGCCTTTCTTA----------GAAGGTGGGAGAACTGAAGGATGACGACTTTGAGAA	CTTGAGGCCTTTCTTACCCAGAAGCAGAAGGTGGGAGAACTGAAGGATGACGACTTTGAGAA	var645	16-C-C-C-A-G-A-A-G-C-A36	0	0	10	-	-	17,18,19,20,21,22,23,24,25,26		17	62
CTTGAGGCCTTTCTTA---------AGCAGGTGGGAGAACTGAAGGATGACGACTTTGAGAA	CTTGAGGCCTTTCTTACCCAGAAGCAGAAGGTGGGAGAACTGAAGGATGACGACTTTGAGAA	var529	16-C-C-C-A-G-A-A-G-C2CA34	1	0	9	28	-	17,18,19,20,21,22,23,24,25		17	62
CTTGAGGCCTTTCTTA-----AGGCTCCAGGTGGGAGAACTGAAGGATGACGACTTTGAGAA	CTTGAGGCCTTTCTTACCCAGAAGCAGAAGGTGGGAGAACTGAAGGATGACGACTTTGAGAA	var1666	16-C-C-C-A-G1GA2TACGCA34	4	0	5	23,26,27,28	-	17,18,19,20,21		17	62
CTTGAGGCCTTTCTTAACCAGA------AGGTGGGAGAACTGAAGGATGACGACTTTGAGAA	CTTGAGGCCTTTCTTACCCAGAAGCAGAAGGTGGGAGAACTGAAGGATGACGACTTTGAGAA	var1477	16AC5-A-G-C-A-G-A34	1	0	6	17	-	23,24,25,26,27,28		23	62
CTTGAGGCCTTTCTTAACCAGAAGCAG---GTGGGAGAACTGAAGGATGACGACTTTGAGAA	CTTGAGGCCTTTCTTACCCAGAAGCAGAAGGTGGGAGAACTGAAGGATGACGACTTTGAGAA	var451	16AC10-A-A-G32	1	0	3	17	-	28,29,30		28	62
CTTGAGGCCTTTCTTAACCAGAAGCAGA-GGTGGGAGAACTGAAGGATGACGACTTTGAGAA	CTTGAGGCCTTTCTTACCCAGAAGCAGAAGGTGGGAGAACTGAAGGATGACGACTTTGAGAA	var1037	16AC11-A33	1	0	1	17	-	29		29	62
CTTGAGGCCTTTCTTAACCAGAAGCAGAA----------CTGAAGGATGACGACTTTGAGAA	CTTGAGGCCTTTCTTACCCAGAAGCAGAAGGTGGGAGAACTGAAGGATGACGACTTTGAGAA	var1215	16AC12-G-G-T-G-G-G-A-G-A-A23	1	0	10	17	-	30,31,32,33,34,35,36,37,38,39		30	62
CTTGAGGCCTTTCTTAACCAGAAGCAGAAAGGTGGGAGAACTGAAGGATGACGACTTTGAGA	CTTGAGGCCTTTCTTACCCAGAAGCAGAA-GGTGGGAGAACTGAAGGATGACGACTTTGAGA	var458	16AC12A-32	1	1	0	17	30	-	30		62
CTTGAGGCCTTTCTTAACCAGAAGCAGAAGGAGGGAGAACTGAAGGATGACGACTTTGAGAA	CTTGAGGCCTTTCTTACCCAGAAGCAGAAGGTGGGAGAACTGAAGGATGACGACTTTGAGAA	var799	16AC14AT30	2	0	0	17,32	-	-			62
CTTGAGGCCTTTCTTAACCAGAAGCAGAAGGTGGGAGAACTGAAGGATGACGACTTTGAGAA	CTTGAGGCCTTTCTTACCCAGAAGCAGAAGGTGGGAGAACTGAAGGATGACGACTTTGAGAA	var119	16AC45	1	0	0	17	-	-			62
CTTGAGGCCTTTCTTAC	CTTGAGGCCTTTCTTAC	var1115	17	0	0	45	-	-	18,19,20,21,22,23,24,25,26,27,28,29,30,31,32,33,34,35,36,37,38,39,40,41,42,43,44,45,46,47,48,49,50,51,52,53,54,55,56,57,58,59,60,61,62	-	18	17
CTTGAGGCCTTTCTTAC	CTTGAGGCCTTTCTTAC	var1171	17	0	0	45	-	-	18,19,20,21,22,23,24,25,26,27,28,29,30,31,32,33,34,35,36,37,38,39,40,41,42,43,44,45,46,47,48,49,50,51,52,53,54,55,56,57,58,59,60,61,62	-	18	17
CTTGAGGCCTTTCTTAC	CTTGAGGCCTTTCTTAC	var1348	17	0	0	45	-	-	18,19,20,21,22,23,24,25,26,27,28,29,30,31,32,33,34,35,36,37,38,39,40,41,42,43,44,45,46,47,48,49,50,51,52,53,54,55,56,57,58,59,60,61,62	-	18	17
CTTGAGGCCTTTCTTAC	CTTGAGGCCTTTCTTAC	var1490	17	0	0	45	-	-	18,19,20,21,22,23,24,25,26,27,28,29,30,31,32,33,34,35,36,37,38,39,40,41,42,43,44,45,46,47,48,49,50,51,52,53,54,55,56,57,58,59,60,61,62	-	18	17
CTTGAGGCCTTTCTTAC	CTTGAGGCCTTTCTTAC	var216	17	0	0	45	-	-	18,19,20,21,22,23,24,25,26,27,28,29,30,31,32,33,34,35,36,37,38,39,40,41,42,43,44,45,46,47,48,49,50,51,52,53,54,55,56,57,58,59,60,61,62	-	18	17
CTTGAGGCCTTTCTTAC	CTTGAGGCCTTTCTTAC	var277	17	0	0	45	-	-	18,19,20,21,22,23,24,25,26,27,28,29,30,31,32,33,34,35,36,37,38,39,40,41,42,43,44,45,46,47,48,49,50,51,52,53,54,55,56,57,58,59,60,61,62	-	18	17
CTTGAGGCCTTTCTTAC	CTTGAGGCCTTTCTTAC	var368	17	0	0	45	-	-	18,19,20,21,22,23,24,25,26,27,28,29,30,31,32,33,34,35,36,37,38,39,40,41,42,43,44,45,46,47,48,49,50,51,52,53,54,55,56,57,58,59,60,61,62	-	18	17
CTTGAGGCCTTTCTTAC	CTTGAGGCCTTTCTTAC	var436	17	0	0	45	-	-	18,19,20,21,22,23,24,25,26,27,28,29,30,31,32,33,34,35,36,37,38,39,40,41,42,43,44,45,46,47,48,49,50,51,52,53,54,55,56,57,58,59,60,61,62	-	18	17
CTTGAGGCCTTTCTTAC	CTTGAGGCCTTTCTTAC	var445	17	0	0	45	-	-	18,19,20,21,22,23,24,25,26,27,28,29,30,31,32,33,34,35,36,37,38,39,40,41,42,43,44,45,46,47,48,49,50,51,52,53,54,55,56,57,58,59,60,61,62	-	18	17
CTTGAGGCCTTTCTTAC	CTTGAGGCCTTTCTTAC	var447	17	0	0	45	-	-	18,19,20,21,22,23,24,25,26,27,28,29,30,31,32,33,34,35,36,37,38,39,40,41,42,43,44,45,46,47,48,49,50,51,52,53,54,55,56,57,58,59,60,61,62	-	18	17
CTTGAGGCCTTTCTTAC	CTTGAGGCCTTTCTTAC	var46	17	0	0	45	-	-	18,19,20,21,22,23,24,25,26,27,28,29,30,31,32,33,34,35,36,37,38,39,40,41,42,43,44,45,46,47,48,49,50,51,52,53,54,55,56,57,58,59,60,61,62	-	18	17
CTTGAGGCCTTTCTTAC	CTTGAGGCCTTTCTTAC	var533	17	0	0	45	-	-	18,19,20,21,22,23,24,25,26,27,28,29,30,31,32,33,34,35,36,37,38,39,40,41,42,43,44,45,46,47,48,49,50,51,52,53,54,55,56,57,58,59,60,61,62	-	18	17
CTTGAGGCCTTTCTTAC	CTTGAGGCCTTTCTTAC	var824	17	0	0	45	-	-	18,19,20,21,22,23,24,25,26,27,28,29,30,31,32,33,34,35,36,37,38,39,40,41,42,43,44,45,46,47,48,49,50,51,52,53,54,55,56,57,58,59,60,61,62	-	18	17
CTTGAGGCCTTTCTTAC	CTTGAGGCCTTTCTTAC	var871	17	0	0	45	-	-	18,19,20,21,22,23,24,25,26,27,28,29,30,31,32,33,34,35,36,37,38,39,40,41,42,43,44,45,46,47,48,49,50,51,52,53,54,55,56,57,58,59,60,61,62	-	18	17
CTTGAGGCCTTTCTTAC	CTTGAGGCCTTTCTTAC	var990	17	0	0	45	-	-	18,19,20,21,22,23,24,25,26,27,28,29,30,31,32,33,34,35,36,37,38,39,40,41,42,43,44,45,46,47,48,49,50,51,52,53,54,55,56,57,58,59,60,61,62	-	18	17
CTTGAGGCCTTTCTTAC-------------GTGGGAGAACTGAAGGATGACGACTTTGAGAA	CTTGAGGCCTTTCTTACCCAGAAGCAGAAGGTGGGAGAACTGAAGGATGACGACTTTGAGAA	var1349	17-C-C-A-G-A-A-G-C-A-G-A-A-G32	0	0	13	-	-	18,19,20,21,22,23,24,25,26,27,28,29,30		18	62
CTTGAGGCCTTTCTTAC-----------AGGTGGGAGAACTGAAGGATGACGACTTTGAGAA	CTTGAGGCCTTTCTTACCCAGAAGCAGAAGGTGGGAGAACTGAAGGATGACGACTTTGAGAA	var111	17-C-C-A-G-A-A-G-C-A-G-A34	0	0	11	-	-	18,19,20,21,22,23,24,25,26,27,28		18	62
CTTGAGGCCTTTCTTAC----------AAGGTGGGAGAACTGAAGGATGACGACTTTGAGAA	CTTGAGGCCTTTCTTACCCAGAAGCAGAAGGTGGGAGAACTGAAGGATGACGACTTTGAGAA	var468	17-C-C-A-G-A-A-G-C-A-G35	0	0	10	-	-	18,19,20,21,22,23,24,25,26,27		18	62
CTTGAGGCCTTTCTTAC---------GAAGGTGGGAGAACTGAAGGATGACGACTTTGAGAA	CTTGAGGCCTTTCTTACCCAGAAGCAGAAGGTGGGAGAACTGAAGGATGACGACTTTGAGAA	var1416	17-C-C-A-G-A-A-G-C-A36	0	0	9	-	-	18,19,20,21,22,23,24,25,26		18	62
CTTGAGGCCTTTCTTAC--------AGAAGGTGGGAGAACTGAAGGATGACGACTTTGAGAA	CTTGAGGCCTTTCTTACCCAGAAGCAGAAGGTGGGAGAACTGAAGGATGACGACTTTGAGAA	var1467	17-C-C-A-G-A-A-G-C37	0	0	8	-	-	18,19,20,21,22,23,24,25		18	62
CTTGAGGCCTTTCTTACACAGAAGCAG---GTGGGAGAACTGAAGGATGACGACTTTGAGAA	CTTGAGGCCTTTCTTACCCAGAAGCAGAAGGTGGGAGAACTGAAGGATGACGACTTTGAGAA	var617	17AC9-A-A-G32	1	0	3	18	-	28,29,30		28	62
CTTGAGGCCTTTCTTACACAGAAGCAGA-GGTGGGAGAACTGAAGGATGACGACTTTGAGAA	CTTGAGGCCTTTCTTACCCAGAAGCAGAAGGTGGGAGAACTGAAGGATGACGACTTTGAGAA	var1521	17AC10-A33	1	0	1	18	-	29		29	62
CTTGAGGCCTTTCTTACACAGAAGCAGAAAGGTGGGAGAACTGAAGGATGACGACTTTGAGA	CTTGAGGCCTTTCTTACCCAGAAGCAGAA-GGTGGGAGAACTGAAGGATGACGACTTTGAGA	var870	17AC11A-32	1	1	0	18	30	-	30		62
CTTGAGGCCTTTCTTACACAGAAGCAGAAGGAGGGAGAACTGAAGGATGACGACTTTGAGAA	CTTGAGGCCTTTCTTACCCAGAAGCAGAAGGTGGGAGAACTGAAGGATGACGACTTTGAGAA	var1293	17AC13AT30	2	0	0	18,32	-	-			62
CTTGAGGCCTTTCTTACACAGAAGCAGAAGGTGGGAGAACTGAAGGATGACGACTTTGAGAA	CTTGAGGCCTTTCTTACCCAGAAGCAGAAGGTGGGAGAACTGAAGGATGACGACTTTGAGAA	var217	17AC44	1	0	0	18	-	-			62
CTTGAGGCCTTTCTTACACTGAAG	CTTGAGGCCTTTCTTACCCAGAAG	var395	17AC1TA4	2	0	0	18,20	-	-			24
CTTGAGGCCTTTCTTACC	CTTGAGGCCTTTCTTACC	var1043	18	0	0	44	-	-	19,20,21,22,23,24,25,26,27,28,29,30,31,32,33,34,35,36,37,38,39,40,41,42,43,44,45,46,47,48,49,50,51,52,53,54,55,56,57,58,59,60,61,62	-	19	18
CTTGAGGCCTTTCTTACC	CTTGAGGCCTTTCTTACC	var126	18	0	0	44	-	-	19,20,21,22,23,24,25,26,27,28,29,30,31,32,33,34,35,36,37,38,39,40,41,42,43,44,45,46,47,48,49,50,51,52,53,54,55,56,57,58,59,60,61,62	-	19	18
CTTGAGGCCTTTCTTACC	CTTGAGGCCTTTCTTACC	var147	18	0	0	44	-	-	19,20,21,22,23,24,25,26,27,28,29,30,31,32,33,34,35,36,37,38,39,40,41,42,43,44,45,46,47,48,49,50,51,52,53,54,55,56,57,58,59,60,61,62	-	19	18
CTTGAGGCCTTTCTTACC	CTTGAGGCCTTTCTTACC	var167	18	0	0	44	-	-	19,20,21,22,23,24,25,26,27,28,29,30,31,32,33,34,35,36,37,38,39,40,41,42,43,44,45,46,47,48,49,50,51,52,53,54,55,56,57,58,59,60,61,62	-	19	18
CTTGAGGCCTTTCTTACC	CTTGAGGCCTTTCTTACC	var224	18	0	0	44	-	-	19,20,21,22,23,24,25,26,27,28,29,30,31,32,33,34,35,36,37,38,39,40,41,42,43,44,45,46,47,48,49,50,51,52,53,54,55,56,57,58,59,60,61,62	-	19	18
CTTGAGGCCTTTCTTACC	CTTGAGGCCTTTCTTACC	var274	18	0	0	44	-	-	19,20,21,22,23,24,25,26,27,28,29,30,31,32,33,34,35,36,37,38,39,40,41,42,43,44,45,46,47,48,49,50,51,52,53,54,55,56,57,58,59,60,61,62	-	19	18
CTTGAGGCCTTTCTTACC	CTTGAGGCCTTTCTTACC	var439	18	0	0	44	-	-	19,20,21,22,23,24,25,26,27,28,29,30,31,32,33,34,35,36,37,38,39,40,41,42,43,44,45,46,47,48,49,50,51,52,53,54,55,56,57,58,59,60,61,62	-	19	18
CTTGAGGCCTTTCTTACC	CTTGAGGCCTTTCTTACC	var532	18	0	0	44	-	-	19,20,21,22,23,24,25,26,27,28,29,30,31,32,33,34,35,36,37,38,39,40,41,42,43,44,45,46,47,48,49,50,51,52,53,54,55,56,57,58,59,60,61,62	-	19	18
CTTGAGGCCTTTCTTACC	CTTGAGGCCTTTCTTACC	var755	18	0	0	44	-	-	19,20,21,22,23,24,25,26,27,28,29,30,31,32,33,34,35,36,37,38,39,40,41,42,43,44,45,46,47,48,49,50,51,52,53,54,55,56,57,58,59,60,61,62	-	19	18
CTTGAGGCCTTTCTTACC	CTTGAGGCCTTTCTTACC	var828	18	0	0	44	-	-	19,20,21,22,23,24,25,26,27,28,29,30,31,32,33,34,35,36,37,38,39,40,41,42,43,44,45,46,47,48,49,50,51,52,53,54,55,56,57,58,59,60,61,62	-	19	18
CTTGAGGCCTTTCTTACC	CTTGAGGCCTTTCTTACC	var899	18	0	0	44	-	-	19,20,21,22,23,24,25,26,27,28,29,30,31,32,33,34,35,36,37,38,39,40,41,42,43,44,45,46,47,48,49,50,51,52,53,54,55,56,57,58,59,60,61,62	-	19	18
CTTGAGGCCTTTCTTACC-------------TGGGAGAACTGAAGGATGACGACTTTGAGAA	CTTGAGGCCTTTCTTACCCAGAAGCAGAAGGTGGGAGAACTGAAGGATGACGACTTTGAGAA	var1143	18-C-A-G-A-A-G-C-A-G-A-A-G-G31	0	0	13	-	-	19,20,21,22,23,24,25,26,27,28,29,30,31		19	62
CTTGAGGCCTTTCTTACC----------AGGTGGGAGAACTGAAGGATGACGACTTTGAGAA	CTTGAGGCCTTTCTTACCCAGAAGCAGAAGGTGGGAGAACTGAAGGATGACGACTTTGAGAA	var179	18-C-A-G-A-A-G-C-A-G-A34	0	0	10	-	-	19,20,21,22,23,24,25,26,27,28		19	62
CTTGAGGCCTTTCTTACC---------AAGGTGGGAGAACTGAAGGATGACGACTTTGAGAA	CTTGAGGCCTTTCTTACCCAGAAGCAGAAGGTGGGAGAACTGAAGGATGACGACTTTGAGAA	var242	18-C-A-G-A-A-G-C-A-G35	0	0	9	-	-	19,20,21,22,23,24,25,26,27		19	62
CTTGAGGCCTTTCTTACC-------AGAAACTGGGAGAACTGAAGGATGACGACTTTGAGAA	CTTGAGGCCTTTCTTACCCAGAAGCAGAAGGTGGGAGAACTGAAGGATGACGACTTTGAGAA	var982	18-C-A-G-A-A-G-C4AGCG31	2	0	7	30,31	-	19,20,21,22,23,24,25		19	62
CTTGAGGCCTTTCTTACC-------AGAAGGTGGGAGAACTGAAGGATGACGACTTTGAGAA	CTTGAGGCCTTTCTTACCCAGAAGCAGAAGGTGGGAGAACTGAAGGATGACGACTTTGAGAA	var123	18-C-A-G-A-A-G-C37	0	0	7	-	-	19,20,21,22,23,24,25		19	62
CTTGAGGCCTTTCTTACC-AGAA--AGCAGGTGGGAGAACTGAAGGATGACGACTTTGAGAA	CTTGAGGCCTTTCTTACCCAGAAGCAGAAGGTGGGAGAACTGAAGGATGACGACTTTGAGAA	var1564	18-C4-G-C2CA34	1	0	3	28	-	19,24,25		19	62
CTTGAGGCCTTTCTTACC-AGAAGCAG---GTGGGAGAACTGAAGAACTGAAGGATGACGACTTTG	CTTGAGGCCTTTCTTACCCAGAAGCAGAAGGTGGGAGAA--------CTGAAGGATGACGACTTTG	var861	18-C8-A-A-G9C-T-G-A-A-G-A-A-19	0	8	0	-	40,41,42,43,44,45,46,47	-	40		66
CTTGAGGCCTTTCTTACC-AGAAGCAG---GTGGGAGAACTGAAGGATGACGACTTTGAGAA	CTTGAGGCCTTTCTTACCCAGAAGCAGAAGGTGGGAGAACTGAAGGATGACGACTTTGAGAA	var135	18-C8-A-A-G32	0	0	4	-	-	19,28,29,30		19	62
CTTGAGGCCTTTCTTACC-AGAAGCAGAAAGGTGGGAGAACTGAAGGATGACGACTTTGAGAA	CTTGAGGCCTTTCTTACCCAGAAGCAGAA-GGTGGGAGAACTGAAGGATGACGACTTTGAGAA	var946	18-C10A-33	0	1	0	-	30	-	30		63
CTTGAGGCCTTTCTTACC-AGAAGCAGAAGCAGGTGGGAGAACTGAAGGATGACGACTTTGAG	CTTGAGGCCTTTCTTACCCAGAAGCAGAAG---GTGGGAGAACTGAAGGATGACGACTTTGAG	var1482	18-C11C-A-G-30	0	3	0	-	31,32,33	-	31		63
CTTGAGGCCTTTCTTACC-AGAAGCAGAAGGTGGGAGAACTGAAGGATGACGACTTTGAGAA	CTTGAGGCCTTTCTTACCCAGAAGCAGAAGGTGGGAGAACTGAAGGATGACGACTTTGAGAA	var223	18-C43	0	0	1	-	-	19		19	62
CTTGAGGCCTTTCTTACC-AGAAGCTTCTGGTGGGAGAACTGAAGGATGACGACTTTGAGAA	CTTGAGGCCTTTCTTACCCAGAAGCAGAAGGTGGGAGAACTGAAGGATGACGACTTTGAGAA	var843	18-C6TATGCATA33	4	0	1	26,27,28,29	-	19		19	62
CTTGAGGCCTTTCTTACCA-----CAGAAGGTGGGAGAACTGAAGGATGACGACTTTGAGAA	CTTGAGGCCTTTCTTACCCAGAAGCAGAAGGTGGGAGAACTGAAGGATGACGACTTTGAGAA	var1507	18AC-A-G-A-A-G38	1	0	5	19	-	20,21,22,23,24		20	62
CTTGAGGCCTTTCTTACCAAG	CTTGAGGCCTTTCTTACCCAG	var663	18AC2	1	0	0	19	-	-			21
CTTGAGGCCTTTCTTACCAAGAA------GGTGGGAGAACTGAAGGATGACGACTTTGAGAA	CTTGAGGCCTTTCTTACCCAGAAGCAGAAGGTGGGAGAACTGAAGGATGACGACTTTGAGAA	var737	18AC4-G-C-A-G-A-A33	1	0	6	19	-	24,25,26,27,28,29		24	62
CTTGAGGCCTTTCTTACCAAGAAG---AAGGTGGGAGAACTGAAGGATGACGACTTTGAGAA	CTTGAGGCCTTTCTTACCCAGAAGCAGAAGGTGGGAGAACTGAAGGATGACGACTTTGAGAA	var1529	18AC5-C-A-G35	1	0	3	19	-	25,26,27		25	62
CTTGAGGCCTTTCTTACCAAGAAGAAGAAGGTGGGAGAACTGAAGGATGACGACTTTGAGAA	CTTGAGGCCTTTCTTACCCAGAAGCAGAAGGTGGGAGAACTGAAGGATGACGACTTTGAGAA	var633	18AC5AC37	2	0	0	19,25	-	-			62
CTTGAGGCCTTTCTTACCAAGAAGCAG---GTGGGAGAACTGAAGGATGACGACTTTGAGAA	CTTGAGGCCTTTCTTACCCAGAAGCAGAAGGTGGGAGAACTGAAGGATGACGACTTTGAGAA	var249	18AC8-A-A-G32	1	0	3	19	-	28,29,30		28	62
CTTGAGGCCTTTCTTACCAAGAAGCAGA-GGTGGGAGAACTGAAGGATGACGACTTTGAGAA	CTTGAGGCCTTTCTTACCCAGAAGCAGAAGGTGGGAGAACTGAAGGATGACGACTTTGAGAA	var586	18AC9-A33	1	0	1	19	-	29		29	62
CTTGAGGCCTTTCTTACCAAGAAGCAGAA----------CTGAAGGATGACGACTTTGAGAA	CTTGAGGCCTTTCTTACCCAGAAGCAGAAGGTGGGAGAACTGAAGGATGACGACTTTGAGAA	var744	18AC10-G-G-T-G-G-G-A-G-A-A23	1	0	10	19	-	30,31,32,33,34,35,36,37,38,39		30	62
CTTGAGGCCTTTCTTACCAAGAAGCAGAAAGGTGGGAGAACTGAAGGATGACGACTTTGAGA	CTTGAGGCCTTTCTTACCCAGAAGCAGAA-GGTGGGAGAACTGAAGGATGACGACTTTGAGA	var248	18AC10A-32	1	1	0	19	30	-	30		62
CTTGAGGCCTTTCTTACCAAGAAGCAGAAGGTGGGAGAACTGAAGGATGACGACTTTGAGAA	CTTGAGGCCTTTCTTACCCAGAAGCAGAAGGTGGGAGAACTGAAGGATGACGACTTTGAGAA	var63	18AC43	1	0	0	19	-	-			62
CTTGAGGCCTTTCTTACCAAGAAGCAGAAGGTGGGAGAACTGAAGGATGCCGACTTTGAGAA	CTTGAGGCCTTTCTTACCCAGAAGCAGAAGGTGGGAGAACTGAAGGATGACGACTTTGAGAA	var1141	18AC30CA12	2	0	0	19,50	-	-			62
CTTGAGGCCTTTCTTACCC	CTTGAGGCCTTTCTTACCC	var1419	19	0	0	43	-	-	20,21,22,23,24,25,26,27,28,29,30,31,32,33,34,35,36,37,38,39,40,41,42,43,44,45,46,47,48,49,50,51,52,53,54,55,56,57,58,59,60,61,62	-	20	19
CTTGAGGCCTTTCTTACCC	CTTGAGGCCTTTCTTACCC	var1630	19	0	0	43	-	-	20,21,22,23,24,25,26,27,28,29,30,31,32,33,34,35,36,37,38,39,40,41,42,43,44,45,46,47,48,49,50,51,52,53,54,55,56,57,58,59,60,61,62	-	20	19
CTTGAGGCCTTTCTTACCC	CTTGAGGCCTTTCTTACCC	var534	19	0	0	43	-	-	20,21,22,23,24,25,26,27,28,29,30,31,32,33,34,35,36,37,38,39,40,41,42,43,44,45,46,47,48,49,50,51,52,53,54,55,56,57,58,59,60,61,62	-	20	19
CTTGAGGCCTTTCTTACCC	CTTGAGGCCTTTCTTACCC	var738	19	0	0	43	-	-	20,21,22,23,24,25,26,27,28,29,30,31,32,33,34,35,36,37,38,39,40,41,42,43,44,45,46,47,48,49,50,51,52,53,54,55,56,57,58,59,60,61,62	-	20	19
CTTGAGGCCTTTCTTACCC	CTTGAGGCCTTTCTTACCC	var991	19	0	0	43	-	-	20,21,22,23,24,25,26,27,28,29,30,31,32,33,34,35,36,37,38,39,40,41,42,43,44,45,46,47,48,49,50,51,52,53,54,55,56,57,58,59,60,61,62	-	20	19
CTTGAGGCCTTTCTTACCC----------------AGAACTGAAGGATGACGAATTTGAGAA	CTTGAGGCCTTTCTTACCCAGAAGCAGAAGGTGGGAGAACTGAAGGATGACGACTTTGAGAA	var1156	19-A-G-A-A-G-C-A-G-A-A-G-G-T-G-G-G18AC8	1	0	16	54	-	20,21,22,23,24,25,26,27,28,29,30,31,32,33,34,35		20	62
CTTGAGGCCTTTCTTACCC----------------AGAACTGAAGGATGACGACTTTGA	CTTGAGGCCTTTCTTACCCAGAAGCAGAAGGTGGGAGAACTGAAGGATGACGACTTTGA	var1125	19-A-G-A-A-G-C-A-G-A-A-G-G-T-G-G-G24	0	0	16	-	-	20,21,22,23,24,25,26,27,28,29,30,31,32,33,34,35		20	59
CTTGAGGCCTTTCTTACCC----------------AGAACTGAAGGATGGCGACTTTGAGAA	CTTGAGGCCTTTCTTACCCAGAAGCAGAAGGTGGGAGAACTGAAGGATGACGACTTTGAGAA	var1555	19-A-G-A-A-G-C-A-G-A-A-G-G-T-G-G-G14GA12	1	0	16	50	-	20,21,22,23,24,25,26,27,28,29,30,31,32,33,34,35		20	62
CTTGAGGCCTTTCTTACCC----------GGTGGGAGAACTGAAGGATGACGACTTTGAGAA	CTTGAGGCCTTTCTTACCCAGAAGCAGAAGGTGGGAGAACTGAAGGATGACGACTTTGAGAA	var1445	19-A-G-A-A-G-C-A-G-A-A33	0	0	10	-	-	20,21,22,23,24,25,26,27,28,29		20	62
CTTGAGGCCTTTCTTACCC-----CAGAAGGTGGGAGAACTGAAGGATGACGACTTTGAGAA	CTTGAGGCCTTTCTTACCCAGAAGCAGAAGGTGGGAGAACTGAAGGATGACGACTTTGAGAA	var574	19-A-G-A-A-G38	0	0	5	-	-	20,21,22,23,24		20	62
CTTGAGGCCTTTCTTACCC-GAAG	CTTGAGGCCTTTCTTACCCAGAAG	var500	19-A4	0	0	1	-	-	20		20	24
CTTGAGGCCTTTCTTACCCA	CTTGAGGCCTTTCTTACCCA	var1397	20	0	0	42	-	-	21,22,23,24,25,26,27,28,29,30,31,32,33,34,35,36,37,38,39,40,41,42,43,44,45,46,47,48,49,50,51,52,53,54,55,56,57,58,59,60,61,62	-	21	20
CTTGAGGCCTTTCTTACCCA	CTTGAGGCCTTTCTTACCCA	var1665	20	0	0	42	-	-	21,22,23,24,25,26,27,28,29,30,31,32,33,34,35,36,37,38,39,40,41,42,43,44,45,46,47,48,49,50,51,52,53,54,55,56,57,58,59,60,61,62	-	21	20
CTTGAGGCCTTTCTTACCCA	CTTGAGGCCTTTCTTACCCA	var243	20	0	0	42	-	-	21,22,23,24,25,26,27,28,29,30,31,32,33,34,35,36,37,38,39,40,41,42,43,44,45,46,47,48,49,50,51,52,53,54,55,56,57,58,59,60,61,62	-	21	20
CTTGAGGCCTTTCTTACCCA	CTTGAGGCCTTTCTTACCCA	var314	20	0	0	42	-	-	21,22,23,24,25,26,27,28,29,30,31,32,33,34,35,36,37,38,39,40,41,42,43,44,45,46,47,48,49,50,51,52,53,54,55,56,57,58,59,60,61,62	-	21	20
CTTGAGGCCTTTCTTACCCA	CTTGAGGCCTTTCTTACCCA	var348	20	0	0	42	-	-	21,22,23,24,25,26,27,28,29,30,31,32,33,34,35,36,37,38,39,40,41,42,43,44,45,46,47,48,49,50,51,52,53,54,55,56,57,58,59,60,61,62	-	21	20
CTTGAGGCCTTTCTTACCCA	CTTGAGGCCTTTCTTACCCA	var83	20	0	0	42	-	-	21,22,23,24,25,26,27,28,29,30,31,32,33,34,35,36,37,38,39,40,41,42,43,44,45,46,47,48,49,50,51,52,53,54,55,56,57,58,59,60,61,62	-	21	20
CTTGAGGCCTTTCTTACCCA-----------TGGGAGAACTGAAGGATGACGACTTTGAGAA	CTTGAGGCCTTTCTTACCCAGAAGCAGAAGGTGGGAGAACTGAAGGATGACGACTTTGAGAA	var1491	20-G-A-A-G-C-A-G-A-A-G-G31	0	0	11	-	-	21,22,23,24,25,26,27,28,29,30,31		21	62
CTTGAGGCCTTTCTTACCCA--------AGGTGGGAGAACTGAAGGATGACGACTTTGAGAA	CTTGAGGCCTTTCTTACCCAGAAGCAGAAGGTGGGAGAACTGAAGGATGACGACTTTGAGAA	var133	20-G-A-A-G-C-A-G-A34	0	0	8	-	-	21,22,23,24,25,26,27,28		21	62
CTTGAGGCCTTTCTTACCCA-------AAGGTGGGAGAACTGAAGGATGACGACTTTGAGAA	CTTGAGGCCTTTCTTACCCAGAAGCAGAAGGTGGGAGAACTGAAGGATGACGACTTTGAGAA	var290	20-G-A-A-G-C-A-G35	0	0	7	-	-	21,22,23,24,25,26,27		21	62
CTTGAGGCCTTTCTTACCCA----CCTAAGGTGGGAGAACTGAAGGATGACGACTTTGAGAA	CTTGAGGCCTTTCTTACCCAGAAGCAGAAGGTGGGAGAACTGAAGGATGACGACTTTGAGAA	var729	20-G-A-A-G1CATG35	2	0	4	26,27	-	21,22,23,24		21	62
CTTGAGGCCTTTCTTACCCAAAAGCAG---GTGGGAGAACTGAAGGATGACGACTTTGAGAA	CTTGAGGCCTTTCTTACCCAGAAGCAGAAGGTGGGAGAACTGAAGGATGACGACTTTGAGAA	var1128	20AG6-A-A-G32	1	0	3	21	-	28,29,30		28	62
CTTGAGGCCTTTCTTACCCAAAAGCAGAAAGGTGGGAGAACTGAAGGATGACGACTTTGAGA	CTTGAGGCCTTTCTTACCCAGAAGCAGAA-GGTGGGAGAACTGAAGGATGACGACTTTGAGA	var1011	20AG8A-32	1	1	0	21	30	-	30		62
CTTGAGGCCTTTCTTACCCAAAAGCAGAAGGTGGGAGAACTGAAGGATGACGACTTTGAGAA	CTTGAGGCCTTTCTTACCCAGAAGCAGAAGGTGGGAGAACTGAAGGATGACGACTTTGAGAA	var284	20AG41	1	0	0	21	-	-			62
CTTGAGGCCTTTCTTACCCACCTG-----GGTGGGAGAACTGAAGGATGACGACTTTGAGAA	CTTGAGGCCTTTCTTACCCAGAAGCAGAAGGTGGGAGAACTGAAGGATGACGACTTTGAGAA	var620	20CGCATA1-C-A-G-A-A33	3	0	5	21,22,23	-	25,26,27,28,29		25	62
CTTGAGGCCTTTCTTACCCACCTGCTTCTGGGTGGGAGAACTGAAGGATGACGACTTTGAGA	CTTGAGGCCTTTCTTACCCAGAAGCAGAAGG-TGGGAGAACTGAAGGATGACGACTTTGAGA	var1327	20CGCATA2TATGCATA2G-30	7	1	0	21,22,23,26,27,28,29	32	-	32		62
CTTGAGGCCTTTCTTACCCAG	CTTGAGGCCTTTCTTACCCAG	var104	21	0	0	41	-	-	22,23,24,25,26,27,28,29,30,31,32,33,34,35,36,37,38,39,40,41,42,43,44,45,46,47,48,49,50,51,52,53,54,55,56,57,58,59,60,61,62	-	22	21
CTTGAGGCCTTTCTTACCCAG	CTTGAGGCCTTTCTTACCCAG	var1188	21	0	0	41	-	-	22,23,24,25,26,27,28,29,30,31,32,33,34,35,36,37,38,39,40,41,42,43,44,45,46,47,48,49,50,51,52,53,54,55,56,57,58,59,60,61,62	-	22	21
CTTGAGGCCTTTCTTACCCAG	CTTGAGGCCTTTCTTACCCAG	var1364	21	0	0	41	-	-	22,23,24,25,26,27,28,29,30,31,32,33,34,35,36,37,38,39,40,41,42,43,44,45,46,47,48,49,50,51,52,53,54,55,56,57,58,59,60,61,62	-	22	21
CTTGAGGCCTTTCTTACCCAG	CTTGAGGCCTTTCTTACCCAG	var1392	21	0	0	41	-	-	22,23,24,25,26,27,28,29,30,31,32,33,34,35,36,37,38,39,40,41,42,43,44,45,46,47,48,49,50,51,52,53,54,55,56,57,58,59,60,61,62	-	22	21
CTTGAGGCCTTTCTTACCCAG	CTTGAGGCCTTTCTTACCCAG	var1584	21	0	0	41	-	-	22,23,24,25,26,27,28,29,30,31,32,33,34,35,36,37,38,39,40,41,42,43,44,45,46,47,48,49,50,51,52,53,54,55,56,57,58,59,60,61,62	-	22	21
CTTGAGGCCTTTCTTACCCAG	CTTGAGGCCTTTCTTACCCAG	var773	21	0	0	41	-	-	22,23,24,25,26,27,28,29,30,31,32,33,34,35,36,37,38,39,40,41,42,43,44,45,46,47,48,49,50,51,52,53,54,55,56,57,58,59,60,61,62	-	22	21
CTTGAGGCCTTTCTTACCCAG-------------GAGAACTGAAGGATGACGACTTTGAGAA	CTTGAGGCCTTTCTTACCCAGAAGCAGAAGGTGGGAGAACTGAAGGATGACGACTTTGAGAA	var74	21-A-A-G-C-A-G-A-A-G-G-T-G-G28	0	0	13	-	-	22,23,24,25,26,27,28,29,30,31,32,33,34		22	62
CTTGAGGCCTTTCTTACCCAG------------GGAGAACTGAAGGATGACGACTTTGAGAA	CTTGAGGCCTTTCTTACCCAGAAGCAGAAGGTGGGAGAACTGAAGGATGACGACTTTGAGAA	var747	21-A-A-G-C-A-G-A-A-G-G-T-G29	0	0	12	-	-	22,23,24,25,26,27,28,29,30,31,32,33		22	62
CTTGAGGCCTTTCTTACCCAG----------TGGGAGAACTGAAGGATGACGACTTTGAGAA	CTTGAGGCCTTTCTTACCCAGAAGCAGAAGGTGGGAGAACTGAAGGATGACGACTTTGAGAA	var109	21-A-A-G-C-A-G-A-A-G-G31	0	0	10	-	-	22,23,24,25,26,27,28,29,30,31		22	62
CTTGAGGCCTTTCTTACCCAG---------GCGGGAGAACTGAAGGATGACGACTTTGAGAA	CTTGAGGCCTTTCTTACCCAGAAGCAGAAGGTGGGAGAACTGAAGGATGACGACTTTGAGAA	var1592	21-A-A-G-C-A-G-A-A-G1CT30	1	0	9	32	-	22,23,24,25,26,27,28,29,30		22	62
CTTGAGGCCTTTCTTACCCAG---------GTGGGAGAACTAAAGGATGACGACTTTGAGAA	CTTGAGGCCTTTCTTACCCAGAAGCAGAAGGTGGGAGAACTGAAGGATGACGACTTTGAGAA	var1435	21-A-A-G-C-A-G-A-A-G11AG20	1	0	9	42	-	22,23,24,25,26,27,28,29,30		22	62
CTTGAGGCCTTTCTTACCCAG---------GTGGGAGAACTGAAGGATGACGAC-TTGAGAA	CTTGAGGCCTTTCTTACCCAGAAGCAGAAGGTGGGAGAACTGAAGGATGACGACTTTGAGAA	var1594	21-A-A-G-C-A-G-A-A-G24-T7	0	0	10	-	-	22,23,24,25,26,27,28,29,30,55		22	62
CTTGAGGCCTTTCTTACCCAG---------GTGGGAGAACTGAAGGATGACGACTTTGA	CTTGAGGCCTTTCTTACCCAGAAGCAGAAGGTGGGAGAACTGAAGGATGACGACTTTGA	var1023	21-A-A-G-C-A-G-A-A-G29	0	0	9	-	-	22,23,24,25,26,27,28,29,30		22	59
CTTGAGGCCTTTCTTACCCAG---------GTGGGAGAACTGAAGGATGACGACTTTGA	CTTGAGGCCTTTCTTACCCAGAAGCAGAAGGTGGGAGAACTGAAGGATGACGACTTTGA	var1436	21-A-A-G-C-A-G-A-A-G29	0	0	9	-	-	22,23,24,25,26,27,28,29,30		22	59
CTTGAGGCCTTTCTTACCCAG---------GTGGGAGAACTGAAGGATGACGACTTTGAGA	CTTGAGGCCTTTCTTACCCAGAAGCAGAAGGTGGGAGAACTGAAGGATGACGACTTTGAGA	var894	21-A-A-G-C-A-G-A-A-G31	0	0	9	-	-	22,23,24,25,26,27,28,29,30		22	61
CTTGAGGCCTTTCTTACCCAG---------GTGGGAGAACTGAAGGATGACGACTTTGAGAA	CTTGAGGCCTTTCTTACCCAGAAGCAGAAGGTGGGAGAACTGAAGGATGACGACTTTGAGAA	var1334	21-A-A-G-C-A-G-A-A-G32	0	0	9	-	-	22,23,24,25,26,27,28,29,30		22	62
CTTGAGGCCTTTCTTACCCAG---------GTGGGAGAACTGAAGGATGACGACTTTGAGAA	CTTGAGGCCTTTCTTACCCAGAAGCAGAAGGTGGGAGAACTGAAGGATGACGACTTTGAGAA	var1403	21-A-A-G-C-A-G-A-A-G32	0	0	9	-	-	22,23,24,25,26,27,28,29,30		22	62
CTTGAGGCCTTTCTTACCCAG---------GTGGGAGAACTGAAGGATGACGACTTTGAGAA	CTTGAGGCCTTTCTTACCCAGAAGCAGAAGGTGGGAGAACTGAAGGATGACGACTTTGAGAA	var8	21-A-A-G-C-A-G-A-A-G32	0	0	9	-	-	22,23,24,25,26,27,28,29,30		22	62
CTTGAGGCCTTTCTTACCCAG---------GTGGGAGAACTGAAGGATGACGACTTTGAGAA	CTTGAGGCCTTTCTTACCCAGAAGCAGAAGGTGGGAGAACTGAAGGATGACGACTTTGAGAA	var932	21-A-A-G-C-A-G-A-A-G32	0	0	9	-	-	22,23,24,25,26,27,28,29,30		22	62
CTTGAGGCCTTTCTTACCCAG---------GTGGGAGAACTGAAGGATGGCGACTTTGAGAA	CTTGAGGCCTTTCTTACCCAGAAGCAGAAGGTGGGAGAACTGAAGGATGACGACTTTGAGAA	var1253	21-A-A-G-C-A-G-A-A-G19GA12	1	0	9	50	-	22,23,24,25,26,27,28,29,30		22	62
CTTGAGGCCTTTCTTACCCAG---------GTGGGAGAACTGAGGGATGACGACTTTGAGAA	CTTGAGGCCTTTCTTACCCAGAAGCAGAAGGTGGGAGAACTGAAGGATGACGACTTTGAGAA	var1595	21-A-A-G-C-A-G-A-A-G13GA18	1	0	9	44	-	22,23,24,25,26,27,28,29,30		22	62
CTTGAGGCCTTTCTTACCCAG---------GTGGGAGAACTGGAGGATGACGACTTTGAGAA	CTTGAGGCCTTTCTTACCCAGAAGCAGAAGGTGGGAGAACTGAAGGATGACGACTTTGAGAA	var1514	21-A-A-G-C-A-G-A-A-G12GA19	1	0	9	43	-	22,23,24,25,26,27,28,29,30		22	62
CTTGAGGCCTTTCTTACCCAG---------GTGGGGGAACTGAAGGATGACGACTTTGAGAA	CTTGAGGCCTTTCTTACCCAGAAGCAGAAGGTGGGAGAACTGAAGGATGACGACTTTGAGAA	var1126	21-A-A-G-C-A-G-A-A-G5GA26	1	0	9	36	-	22,23,24,25,26,27,28,29,30		22	62
CTTGAGGCCTTTCTTACCCAG--------GGTGGGAGAACTGAAGGATGACGACTTTGAGAA	CTTGAGGCCTTTCTTACCCAGAAGCAGAAGGTGGGAGAACTGAAGGATGACGACTTTGAGAA	var1274	21-A-A-G-C-A-G-A-A33	0	0	8	-	-	22,23,24,25,26,27,28,29		22	62
CTTGAGGCCTTTCTTACCCAG-AGCAGAAAGGTGGGAGAACTGAAGGATGACGACTTTGAGAA	CTTGAGGCCTTTCTTACCCAGAAGCAG-AAGGTGGGAGAACTGAAGGATGACGACTTTGAGAA	var1276	21-A5A-35	0	1	0	-	28	-	28		63
CTTGAGGCCTTTCTTACCCAGA	CTTGAGGCCTTTCTTACCCAGA	var113	22	0	0	40	-	-	23,24,25,26,27,28,29,30,31,32,33,34,35,36,37,38,39,40,41,42,43,44,45,46,47,48,49,50,51,52,53,54,55,56,57,58,59,60,61,62	-	23	22
CTTGAGGCCTTTCTTACCCAGA	CTTGAGGCCTTTCTTACCCAGA	var1235	22	0	0	40	-	-	23,24,25,26,27,28,29,30,31,32,33,34,35,36,37,38,39,40,41,42,43,44,45,46,47,48,49,50,51,52,53,54,55,56,57,58,59,60,61,62	-	23	22
CTTGAGGCCTTTCTTACCCAGA	CTTGAGGCCTTTCTTACCCAGA	var1534	22	0	0	40	-	-	23,24,25,26,27,28,29,30,31,32,33,34,35,36,37,38,39,40,41,42,43,44,45,46,47,48,49,50,51,52,53,54,55,56,57,58,59,60,61,62	-	23	22
CTTGAGGCCTTTCTTACCCAGA	CTTGAGGCCTTTCTTACCCAGA	var1655	22	0	0	40	-	-	23,24,25,26,27,28,29,30,31,32,33,34,35,36,37,38,39,40,41,42,43,44,45,46,47,48,49,50,51,52,53,54,55,56,57,58,59,60,61,62	-	23	22
CTTGAGGCCTTTCTTACCCAGA	CTTGAGGCCTTTCTTACCCAGA	var271	22	0	0	40	-	-	23,24,25,26,27,28,29,30,31,32,33,34,35,36,37,38,39,40,41,42,43,44,45,46,47,48,49,50,51,52,53,54,55,56,57,58,59,60,61,62	-	23	22
CTTGAGGCCTTTCTTACCCAGA	CTTGAGGCCTTTCTTACCCAGA	var347	22	0	0	40	-	-	23,24,25,26,27,28,29,30,31,32,33,34,35,36,37,38,39,40,41,42,43,44,45,46,47,48,49,50,51,52,53,54,55,56,57,58,59,60,61,62	-	23	22
CTTGAGGCCTTTCTTACCCAGA	CTTGAGGCCTTTCTTACCCAGA	var443	22	0	0	40	-	-	23,24,25,26,27,28,29,30,31,32,33,34,35,36,37,38,39,40,41,42,43,44,45,46,47,48,49,50,51,52,53,54,55,56,57,58,59,60,61,62	-	23	22
CTTGAGGCCTTTCTTACCCAGA	CTTGAGGCCTTTCTTACCCAGA	var887	22	0	0	40	-	-	23,24,25,26,27,28,29,30,31,32,33,34,35,36,37,38,39,40,41,42,43,44,45,46,47,48,49,50,51,52,53,54,55,56,57,58,59,60,61,62	-	23	22
CTTGAGGCCTTTCTTACCCAGA-----------------CTGAAGGATGACGACTTTGAGAA	CTTGAGGCCTTTCTTACCCAGAAGCAGAAGGTGGGAGAACTGAAGGATGACGACTTTGAGAA	var297	22-A-G-C-A-G-A-A-G-G-T-G-G-G-A-G-A-A23	0	0	17	-	-	23,24,25,26,27,28,29,30,31,32,33,34,35,36,37,38,39		23	62
CTTGAGGCCTTTCTTACCCAGA--------------GAACTGAAGGATGACGACTTTGAGAA	CTTGAGGCCTTTCTTACCCAGAAGCAGAAGGTGGGAGAACTGAAGGATGACGACTTTGAGAA	var31	22-A-G-C-A-G-A-A-G-G-T-G-G-G-A26	0	0	14	-	-	23,24,25,26,27,28,29,30,31,32,33,34,35,36		23	62
CTTGAGGCCTTTCTTACCCAGA------------GAGAACTGAAGGATGACGACTTTGAGAA	CTTGAGGCCTTTCTTACCCAGAAGCAGAAGGTGGGAGAACTGAAGGATGACGACTTTGAGAA	var1071	22-A-G-C-A-G-A-A-G-G-T-G-G28	0	0	12	-	-	23,24,25,26,27,28,29,30,31,32,33,34		23	62
CTTGAGGCCTTTCTTACCCAGA----------GGGAGAACTGAAGGATGACGACTTTGAGAA	CTTGAGGCCTTTCTTACCCAGAAGCAGAAGGTGGGAGAACTGAAGGATGACGACTTTGAGAA	var1213	22-A-G-C-A-G-A-A-G-G-T30	0	0	10	-	-	23,24,25,26,27,28,29,30,31,32		23	62
CTTGAGGCCTTTCTTACCCAGA---------TGGGAGAACTGAAGGATGACGACTTTGAGAA	CTTGAGGCCTTTCTTACCCAGAAGCAGAAGGTGGGAGAACTGAAGGATGACGACTTTGAGAA	var386	22-A-G-C-A-G-A-A-G-G31	0	0	9	-	-	23,24,25,26,27,28,29,30,31		23	62
CTTGAGGCCTTTCTTACCCAGA-------GGTGGGAGAACTGAAGGATGACGACTTTGAGAA	CTTGAGGCCTTTCTTACCCAGAAGCAGAAGGTGGGAGAACTGAAGGATGACGACTTTGAGAA	var65	22-A-G-C-A-G-A-A33	0	0	7	-	-	23,24,25,26,27,28,29		23	62
CTTGAGGCCTTTCTTACCCAGA------AGGTGGGAGAACTGAAGGACGACGACTTTGAGAA	CTTGAGGCCTTTCTTACCCAGAAGCAGAAGGTGGGAGAACTGAAGGATGACGACTTTGAGAA	var996	22-A-G-C-A-G-A19CT14	1	0	6	48	-	23,24,25,26,27,28		23	62
CTTGAGGCCTTTCTTACCCAGA------AGGTGGGAGAACTGAAGGATGACGAATTTGAGAA	CTTGAGGCCTTTCTTACCCAGAAGCAGAAGGTGGGAGAACTGAAGGATGACGACTTTGAGAA	var779	22-A-G-C-A-G-A25AC8	1	0	6	54	-	23,24,25,26,27,28		23	62
CTTGAGGCCTTTCTTACCCAGA------AGGTGGGAGAACTGAAGGATGACGAC-TTGAGAA	CTTGAGGCCTTTCTTACCCAGAAGCAGAAGGTGGGAGAACTGAAGGATGACGACTTTGAGAA	var802	22-A-G-C-A-G-A26-T7	0	0	7	-	-	23,24,25,26,27,28,55		23	62
CTTGAGGCCTTTCTTACCCAGA------AGGTGGGAGAACTGAAGGATGACGACTTTGA	CTTGAGGCCTTTCTTACCCAGAAGCAGAAGGTGGGAGAACTGAAGGATGACGACTTTGA	var538	22-A-G-C-A-G-A31	0	0	6	-	-	23,24,25,26,27,28		23	59
CTTGAGGCCTTTCTTACCCAGA------AGGTGGGAGAACTGAAGGATGACGACTTTGAG	CTTGAGGCCTTTCTTACCCAGAAGCAGAAGGTGGGAGAACTGAAGGATGACGACTTTGAG	var970	22-A-G-C-A-G-A32	0	0	6	-	-	23,24,25,26,27,28		23	60
CTTGAGGCCTTTCTTACCCAGA------AGGTGGGAGAACTGAAGGATGACGACTTTGAGA	CTTGAGGCCTTTCTTACCCAGAAGCAGAAGGTGGGAGAACTGAAGGATGACGACTTTGAGA	var550	22-A-G-C-A-G-A33	0	0	6	-	-	23,24,25,26,27,28		23	61
CTTGAGGCCTTTCTTACCCAGA------AGGTGGGAGAACTGAAGGATGACGACTTTGAGAA	CTTGAGGCCTTTCTTACCCAGAAGCAGAAGGTGGGAGAACTGAAGGATGACGACTTTGAGAA	var1130	22-A-G-C-A-G-A34	0	0	6	-	-	23,24,25,26,27,28		23	62
CTTGAGGCCTTTCTTACCCAGA------AGGTGGGAGAACTGAAGGATGACGACTTTGAGAA	CTTGAGGCCTTTCTTACCCAGAAGCAGAAGGTGGGAGAACTGAAGGATGACGACTTTGAGAA	var1210	22-A-G-C-A-G-A34	0	0	6	-	-	23,24,25,26,27,28		23	62
CTTGAGGCCTTTCTTACCCAGA------AGGTGGGAGAACTGAAGGATGACGACTTTGAGAA	CTTGAGGCCTTTCTTACCCAGAAGCAGAAGGTGGGAGAACTGAAGGATGACGACTTTGAGAA	var444	22-A-G-C-A-G-A34	0	0	6	-	-	23,24,25,26,27,28		23	62
CTTGAGGCCTTTCTTACCCAGA------AGGTGGGAGAACTGAAGGATGACGACTTTGAGAA	CTTGAGGCCTTTCTTACCCAGAAGCAGAAGGTGGGAGAACTGAAGGATGACGACTTTGAGAA	var515	22-A-G-C-A-G-A34	0	0	6	-	-	23,24,25,26,27,28		23	62
CTTGAGGCCTTTCTTACCCAGA------AGGTGGGAGAACTGAAGGATGACGACTTTGAGAA	CTTGAGGCCTTTCTTACCCAGAAGCAGAAGGTGGGAGAACTGAAGGATGACGACTTTGAGAA	var6	22-A-G-C-A-G-A34	0	0	6	-	-	23,24,25,26,27,28		23	62
CTTGAGGCCTTTCTTACCCAGA------AGGTGGGAGAACTGAAGGATGACGACTTTGAGAA	CTTGAGGCCTTTCTTACCCAGAAGCAGAAGGTGGGAGAACTGAAGGATGACGACTTTGAGAA	var649	22-A-G-C-A-G-A34	0	0	6	-	-	23,24,25,26,27,28		23	62
CTTGAGGCCTTTCTTACCCAGA------AGGTGGGAGAACTGAAGGATGACGACTTTGCGAA	CTTGAGGCCTTTCTTACCCAGAAGCAGAAGGTGGGAGAACTGAAGGATGACGACTTTGAGAA	var1647	22-A-G-C-A-G-A30CA3	1	0	6	59	-	23,24,25,26,27,28		23	62
CTTGAGGCCTTTCTTACCCAGA------AGGTGGGAGAACTGAAGGATGACGATTTTGAGAA	CTTGAGGCCTTTCTTACCCAGAAGCAGAAGGTGGGAGAACTGAAGGATGACGACTTTGAGAA	var1598	22-A-G-C-A-G-A25TC8	1	0	6	54	-	23,24,25,26,27,28		23	62
CTTGAGGCCTTTCTTACCCAGA------AGGTGGGAGAACTGAAGGATGGCGACTTTGAGAA	CTTGAGGCCTTTCTTACCCAGAAGCAGAAGGTGGGAGAACTGAAGGATGACGACTTTGAGAA	var834	22-A-G-C-A-G-A21GA12	1	0	6	50	-	23,24,25,26,27,28		23	62
CTTGAGGCCTTTCTTACCCAGA------AGGTGGGAGAACTGAAGGGTGACGACTTTGAGAA	CTTGAGGCCTTTCTTACCCAGAAGCAGAAGGTGGGAGAACTGAAGGATGACGACTTTGAGAA	var1109	22-A-G-C-A-G-A18GA15	1	0	6	47	-	23,24,25,26,27,28		23	62
CTTGAGGCCTTTCTTACCCAGA----GAAAG---GAGAACTGAAGGATGACGACTTTGAGAA	CTTGAGGCCTTTCTTACCCAGAAGCAGAAGGTGGGAGAACTGAAGGATGACGACTTTGAGAA	var1313	22-A-G-C-A3AG1-T-G-G28	1	0	7	30	-	23,24,25,26,32,33,34		23	62
CTTGAGGCCTTTCTTACCCAGAA	CTTGAGGCCTTTCTTACCCAGAA	var1326	23	0	0	39	-	-	24,25,26,27,28,29,30,31,32,33,34,35,36,37,38,39,40,41,42,43,44,45,46,47,48,49,50,51,52,53,54,55,56,57,58,59,60,61,62	-	24	23
CTTGAGGCCTTTCTTACCCAGAA	CTTGAGGCCTTTCTTACCCAGAA	var1365	23	0	0	39	-	-	24,25,26,27,28,29,30,31,32,33,34,35,36,37,38,39,40,41,42,43,44,45,46,47,48,49,50,51,52,53,54,55,56,57,58,59,60,61,62	-	24	23
CTTGAGGCCTTTCTTACCCAGAA	CTTGAGGCCTTTCTTACCCAGAA	var1586	23	0	0	39	-	-	24,25,26,27,28,29,30,31,32,33,34,35,36,37,38,39,40,41,42,43,44,45,46,47,48,49,50,51,52,53,54,55,56,57,58,59,60,61,62	-	24	23
CTTGAGGCCTTTCTTACCCAGAA	CTTGAGGCCTTTCTTACCCAGAA	var433	23	0	0	39	-	-	24,25,26,27,28,29,30,31,32,33,34,35,36,37,38,39,40,41,42,43,44,45,46,47,48,49,50,51,52,53,54,55,56,57,58,59,60,61,62	-	24	23
CTTGAGGCCTTTCTTACCCAGAA	CTTGAGGCCTTTCTTACCCAGAA	var567	23	0	0	39	-	-	24,25,26,27,28,29,30,31,32,33,34,35,36,37,38,39,40,41,42,43,44,45,46,47,48,49,50,51,52,53,54,55,56,57,58,59,60,61,62	-	24	23
CTTGAGGCCTTTCTTACCCAGAA----------------CTAAAGGATGACGACTTTGAGAA	CTTGAGGCCTTTCTTACCCAGAAGCAGAAGGTGGGAGAACTGAAGGATGACGACTTTGAGAA	var1556	23-G-C-A-G-A-A-G-G-T-G-G-G-A-G-A-A2AG20	1	0	16	42	-	24,25,26,27,28,29,30,31,32,33,34,35,36,37,38,39		24	62
CTTGAGGCCTTTCTTACCCAGAA----------------CTGAAGGATGACGACTTTGAGA	CTTGAGGCCTTTCTTACCCAGAAGCAGAAGGTGGGAGAACTGAAGGATGACGACTTTGAGA	var1065	23-G-C-A-G-A-A-G-G-T-G-G-G-A-G-A-A22	0	0	16	-	-	24,25,26,27,28,29,30,31,32,33,34,35,36,37,38,39		24	61
CTTGAGGCCTTTCTTACCCAGAA----------------CTGAAGGATGACGACTTTGAGAA	CTTGAGGCCTTTCTTACCCAGAAGCAGAAGGTGGGAGAACTGAAGGATGACGACTTTGAGAA	var1097	23-G-C-A-G-A-A-G-G-T-G-G-G-A-G-A-A23	0	0	16	-	-	24,25,26,27,28,29,30,31,32,33,34,35,36,37,38,39		24	62
CTTGAGGCCTTTCTTACCCAGAA----------------CTGAAGGATGACGACTTTGAGAA	CTTGAGGCCTTTCTTACCCAGAAGCAGAAGGTGGGAGAACTGAAGGATGACGACTTTGAGAA	var1331	23-G-C-A-G-A-A-G-G-T-G-G-G-A-G-A-A23	0	0	16	-	-	24,25,26,27,28,29,30,31,32,33,34,35,36,37,38,39		24	62
CTTGAGGCCTTTCTTACCCAGAA----------------CTGAAGGATGACGACTTTGAGAA	CTTGAGGCCTTTCTTACCCAGAAGCAGAAGGTGGGAGAACTGAAGGATGACGACTTTGAGAA	var1371	23-G-C-A-G-A-A-G-G-T-G-G-G-A-G-A-A23	0	0	16	-	-	24,25,26,27,28,29,30,31,32,33,34,35,36,37,38,39		24	62
CTTGAGGCCTTTCTTACCCAGAA----------------CTGAAGGATGACGACTTTGAGAA	CTTGAGGCCTTTCTTACCCAGAAGCAGAAGGTGGGAGAACTGAAGGATGACGACTTTGAGAA	var1372	23-G-C-A-G-A-A-G-G-T-G-G-G-A-G-A-A23	0	0	16	-	-	24,25,26,27,28,29,30,31,32,33,34,35,36,37,38,39		24	62
CTTGAGGCCTTTCTTACCCAGAA----------------CTGAAGGATGACGACTTTGAGAA	CTTGAGGCCTTTCTTACCCAGAAGCAGAAGGTGGGAGAACTGAAGGATGACGACTTTGAGAA	var1470	23-G-C-A-G-A-A-G-G-T-G-G-G-A-G-A-A23	0	0	16	-	-	24,25,26,27,28,29,30,31,32,33,34,35,36,37,38,39		24	62
CTTGAGGCCTTTCTTACCCAGAA----------------CTGAAGGATGACGACTTTGAGAA	CTTGAGGCCTTTCTTACCCAGAAGCAGAAGGTGGGAGAACTGAAGGATGACGACTTTGAGAA	var1629	23-G-C-A-G-A-A-G-G-T-G-G-G-A-G-A-A23	0	0	16	-	-	24,25,26,27,28,29,30,31,32,33,34,35,36,37,38,39		24	62
CTTGAGGCCTTTCTTACCCAGAA----------------CTGAAGGATGACGACTTTGAGAA	CTTGAGGCCTTTCTTACCCAGAAGCAGAAGGTGGGAGAACTGAAGGATGACGACTTTGAGAA	var9	23-G-C-A-G-A-A-G-G-T-G-G-G-A-G-A-A23	0	0	16	-	-	24,25,26,27,28,29,30,31,32,33,34,35,36,37,38,39		24	62
CTTGAGGCCTTTCTTACCCAGAA----------------CTGAGGGATGACGACTTTGAGAA	CTTGAGGCCTTTCTTACCCAGAAGCAGAAGGTGGGAGAACTGAAGGATGACGACTTTGAGAA	var1511	23-G-C-A-G-A-A-G-G-T-G-G-G-A-G-A-A4GA18	1	0	16	44	-	24,25,26,27,28,29,30,31,32,33,34,35,36,37,38,39		24	62
CTTGAGGCCTTTCTTACCCAGAA---------------ACTGAAGGATGACGACTTTGAGAA	CTTGAGGCCTTTCTTACCCAGAAGCAGAAGGTGGGAGAACTGAAGGATGACGACTTTGAGAA	var442	23-G-C-A-G-A-A-G-G-T-G-G-G-A-G-A24	0	0	15	-	-	24,25,26,27,28,29,30,31,32,33,34,35,36,37,38		24	62
CTTGAGGCCTTTCTTACCCAGAA--------------AACTGAAGGATGACGACTTTGAGAA	CTTGAGGCCTTTCTTACCCAGAAGCAGAAGGTGGGAGAACTGAAGGATGACGACTTTGAGAA	var261	23-G-C-A-G-A-A-G-G-T-G-G-G-A-G25	0	0	14	-	-	24,25,26,27,28,29,30,31,32,33,34,35,36,37		24	62
CTTGAGGCCTTTCTTACCCAGAA------------AGAACTGAAGGATGACGACTTTGAGAA	CTTGAGGCCTTTCTTACCCAGAAGCAGAAGGTGGGAGAACTGAAGGATGACGACTTTGAGAA	var493	23-G-C-A-G-A-A-G-G-T-G-G-G27	0	0	12	-	-	24,25,26,27,28,29,30,31,32,33,34,35		24	62
CTTGAGGCCTTTCTTACCCAGAA-----AGGTGGGAGAACTGAAGGATGACGACTTTGAGAA	CTTGAGGCCTTTCTTACCCAGAAGCAGAAGGTGGGAGAACTGAAGGATGACGACTTTGAGAA	var34	23-G-C-A-G-A34	0	0	5	-	-	24,25,26,27,28		24	62
CTTGAGGCCTTTCTTACCCAGAA-----AGGTGGGTAAGAACTGAAGGATGACGACTTTGAGAA	CTTGAGGCCTTTCTTACCCAGAAGCAGAAGGTGGG--AGAACTGAAGGATGACGACTTTGAGAA	var1201	23-G-C-A-G-A7T-A-27	0	2	0	-	36,37	-	36		64
CTTGAGGCCTTTCTTACCCAGAA----AAGGTGGGAGAACTGAAGGATGACGACTTTGAGAA	CTTGAGGCCTTTCTTACCCAGAAGCAGAAGGTGGGAGAACTGAAGGATGACGACTTTGAGAA	var736	23-G-C-A-G35	0	0	4	-	-	24,25,26,27		24	62
CTTGAGGCCTTTCTTACCCAGAA--AGAAAGTGGGAGAACTGAAGGATGACGACTTTGAGAA	CTTGAGGCCTTTCTTACCCAGAAGCAGAAGGTGGGAGAACTGAAGGATGACGACTTTGAGAA	var1528	23-G-C4AG32	1	0	2	30	-	24,25		24	62
CTTGAGGCCTTTCTTACCCAGAA--AGATG-TGGGAGAACTGAAGGATGACGACTTTGAGAA	CTTGAGGCCTTTCTTACCCAGAAGCAGAAGGTGGGAGAACTGAAGGATGACGACTTTGAGAA	var1022	23-G-C3TA1-G31	1	0	3	29	-	24,25,31		24	62
CTTGAGGCCTTTCTTACCCAGAA--AGCAGGTGGGAGAACTGAAGGATGACGACTTTGAGAA	CTTGAGGCCTTTCTTACCCAGAAGCAGAAGGTGGGAGAACTGAAGGATGACGACTTTGAGAA	var676	23-G-C2CA34	1	0	2	28	-	24,25		24	62
CTTGAGGCCTTTCTTACCCAGAA-CTGAAG-------AACTGAAGGATGACGACTTTGAGAA	CTTGAGGCCTTTCTTACCCAGAAGCAGAAGGTGGGAGAACTGAAGGATGACGACTTTGAGAA	var1548	23-G1TA4-G-T-G-G-G-A-G25	1	0	8	26	-	24,31,32,33,34,35,36,37		24	62
CTTGAGGCCTTTCTTACCCAGAA-CTGAAGG	CTTGAGGCCTTTCTTACCCAGAAGCAGAAGG	var1593	23-G1TA5	1	0	1	26	-	24		24	31
CTTGAGGCCTTTCTTACCCAGAAA----------GAGAACTGAAGGATGACGACTTTGAGAA	CTTGAGGCCTTTCTTACCCAGAAGCAGAAGGTGGGAGAACTGAAGGATGACGACTTTGAGAA	var504	23AG-C-A-G-A-A-G-G-T-G-G28	1	0	10	24	-	25,26,27,28,29,30,31,32,33,34		25	62
CTTGAGGCCTTTCTTACCCAGAAA---------GGAGAACTGAAGGATGACGACTTTGAGAA	CTTGAGGCCTTTCTTACCCAGAAGCAGAAGGTGGGAGAACTGAAGGATGACGACTTTGAGAA	var618	23AG-C-A-G-A-A-G-G-T-G29	1	0	9	24	-	25,26,27,28,29,30,31,32,33		25	62
CTTGAGGCCTTTCTTACCCAGAAA--------GGGAGAACTGAAGGATGACGACTTTGAGAA	CTTGAGGCCTTTCTTACCCAGAAGCAGAAGGTGGGAGAACTGAAGGATGACGACTTTGAGAA	var612	23AG-C-A-G-A-A-G-G-T30	1	0	8	24	-	25,26,27,28,29,30,31,32		25	62
CTTGAGGCCTTTCTTACCCAGAAA------GTGGGAGAACTGAAGGATGACGACTTTGAGAA	CTTGAGGCCTTTCTTACCCAGAAGCAGAAGGTGGGAGAACTGAAGGATGACGACTTTGAGAA	var234	23AG-C-A-G-A-A-G32	1	0	6	24	-	25,26,27,28,29,30		25	62
CTTGAGGCCTTTCTTACCCAGAAA---AAGGTGGGAGAACTGAAGGATGACGACTTTGAGAA	CTTGAGGCCTTTCTTACCCAGAAGCAGAAGGTGGGAGAACTGAAGGATGACGACTTTGAGAA	var1001	23AG-C-A-G35	1	0	3	24	-	25,26,27		25	62
CTTGAGGCCTTTCTTACCCAGAAACAG---GTGGGAGAACTGAAGGATGACGACTTTGAGAA	CTTGAGGCCTTTCTTACCCAGAAGCAGAAGGTGGGAGAACTGAAGGATGACGACTTTGAGAA	var768	23AG3-A-A-G32	1	0	3	24	-	28,29,30		28	62
CTTGAGGCCTTTCTTACCCAGAAACAGAA	CTTGAGGCCTTTCTTACCCAGAAGCAGAA	var1264	23AG5	1	0	0	24	-	-			29
CTTGAGGCCTTTCTTACCCAGAAACAGAAAGGTGGGAGAACTGAAGGATGACGACTTTGAGA	CTTGAGGCCTTTCTTACCCAGAAGCAGAA-GGTGGGAGAACTGAAGGATGACGACTTTGAGA	var690	23AG5A-32	1	1	0	24	30	-	30		62
CTTGAGGCCTTTCTTACCCAGAAACAGAAGGTGGGAGAACTAAAGGATGACGACTTTGAGAA	CTTGAGGCCTTTCTTACCCAGAAGCAGAAGGTGGGAGAACTGAAGGATGACGACTTTGAGAA	var461	23AG17AG20	2	0	0	24,42	-	-			62
CTTGAGGCCTTTCTTACCCAGAAACAGAAGGTGGGAGAACTGAAGGATGACGACTTTGAGAA	CTTGAGGCCTTTCTTACCCAGAAGCAGAAGGTGGGAGAACTGAAGGATGACGACTTTGAGAA	var129	23AG38	1	0	0	24	-	-			62
CTTGAGGCCTTTCTTACCCAGAAACAGCTCCCTGAGGTGGGAGAACTGAAGGATGACGACTT	CTTGAGGCCTTTCTTACCCAGAAGCAGA------AGGTGGGAGAACTGAAGGATGACGACTT	var1291	23AG3CAT-C-C-C-T-G-28	2	6	0	24,28	29,30,31,32,33,34	-	29		62
CTTGAGGCCTTTCTTACCCAGAAACTGAAGGATGAACTGAAGGGAGAACTGAAGGATGACGA	CTTGAGGCCTTTCTTACCCAGAAGCAGAAGG---------TGGGAGAACTGAAGGATGACGA	var592	23AG1TA5A-T-G-A-A-C-T-G-A-AT21	3	9	0	24,26,41	32,33,34,35,36,37,38,39,40	-	32		62
CTTGAGGCCTTTCTTACCCAGAAAGA-AAGGTGGGAGAACTGAAGGATGACGACTTTGAGAA	CTTGAGGCCTTTCTTACCCAGAAGCAGAAGGTGGGAGAACTGAAGGATGACGACTTTGAGAA	var528	23AGGC1-G35	2	0	1	24,25	-	27		27	62
CTTGAGGCCTTTCTTACCCAGAAAGAAAAACTGAAAGAACTGAAGGATGACGACTTTGAGAA	CTTGAGGCCTTTCTTACCCAGAAGCAGAAGGTGGGAGAACTGAAGGATGACGACTTTGAGAA	var1549	23AGGC1AG2AGCG2AGAG27	7	0	0	24,25,27,30,31,34,35	-	-			62
CTTGAGGCCTTTCTTACCCAGAAAGGCCAGGTGGGAGAACTGAAGGATGACGACTTTGAGAA	CTTGAGGCCTTTCTTACCCAGAAGCAGAAGGTGGGAGAACTGAAGGATGACGACTTTGAGAA	var1585	23AGGCGACGCA34	5	0	0	24,25,26,27,28	-	-			62
CTTGAGGCCTTTCTTACCCAGAAATAGAAGGTGGGAGAACTAAAGGATGACGACTTTGAGAA	CTTGAGGCCTTTCTTACCCAGAAGCAGAAGGTGGGAGAACTGAAGGATGACGACTTTGAGAA	var1510	23AGTC16AG20	3	0	0	24,25,42	-	-			62
CTTGAGGCCTTTCTTACCCAGAAC-------TGGGAGAACTGAAGGATGACGACTTTGAGAA	CTTGAGGCCTTTCTTACCCAGAAGCAGAAGGTGGGAGAACTGAAGGATGACGACTTTGAGAA	var994	23CG-C-A-G-A-A-G-G31	1	0	7	24	-	25,26,27,28,29,30,31		25	62
CTTGAGGCCTTTCTTACCCAGAACCAG---GTGGGAGAACTGAAGGATGACGACTTTGAGAA	CTTGAGGCCTTTCTTACCCAGAAGCAGAAGGTGGGAGAACTGAAGGATGACGACTTTGAGAA	var440	23CG3-A-A-G32	1	0	3	24	-	28,29,30		28	62
CTTGAGGCCTTTCTTACCCAGAACCAGAAGGTGGGAGAACTGAAGGATGACGACTTTGAGAA	CTTGAGGCCTTTCTTACCCAGAAGCAGAAGGTGGGAGAACTGAAGGATGACGACTTTGAGAA	var508	23CG38	1	0	0	24	-	-			62
CTTGAGGCCTTTCTTACCCAGAACCT--AGGTGGGAGAACTGAAGGATGACGACTTTGAGAA	CTTGAGGCCTTTCTTACCCAGAAGCAGAAGGTGGGAGAACTGAAGGATGACGACTTTGAGAA	var358	23CG1TA-G-A34	2	0	2	24,26	-	27,28		27	62
CTTGAGGCCTTTCTTACCCAGAACT----GCTCCTCCAACTGAAGGATGACGACTTTGAGAA	CTTGAGGCCTTTCTTACCCAGAAGCAGAAGGTGGGAGAACTGAAGGATGACGACTTTGAGAA	var1093	23CGTC-A-G-A-A1CG1CGCGTGCACG25	8	0	4	24,25,29,31,32,33,34,35	-	26,27,28,29		26	62
CTTGAGGCCTTTCTTACCCAGAACTCC-----GGGAGAACTGAAGGATGACGACTTTGAGAA	CTTGAGGCCTTTCTTACCCAGAAGCAGAAGGTGGGAGAACTGAAGGATGACGACTTTGAGAA	var1121	23CGTCCACG-A-A-G-G-T30	4	0	5	24,25,26,27	-	28,29,30,31,32		28	62
CTTGAGGCCTTTCTTACCCAGAAG	CTTGAGGCCTTTCTTACCCAGAAG	var10	24	0	0	38	-	-	25,26,27,28,29,30,31,32,33,34,35,36,37,38,39,40,41,42,43,44,45,46,47,48,49,50,51,52,53,54,55,56,57,58,59,60,61,62	-	25	24
CTTGAGGCCTTTCTTACCCAGAAG	CTTGAGGCCTTTCTTACCCAGAAG	var1146	24	0	0	38	-	-	25,26,27,28,29,30,31,32,33,34,35,36,37,38,39,40,41,42,43,44,45,46,47,48,49,50,51,52,53,54,55,56,57,58,59,60,61,62	-	25	24
CTTGAGGCCTTTCTTACCCAGAAG	CTTGAGGCCTTTCTTACCCAGAAG	var1230	24	0	0	38	-	-	25,26,27,28,29,30,31,32,33,34,35,36,37,38,39,40,41,42,43,44,45,46,47,48,49,50,51,52,53,54,55,56,57,58,59,60,61,62	-	25	24
CTTGAGGCCTTTCTTACCCAGAAG	CTTGAGGCCTTTCTTACCCAGAAG	var1263	24	0	0	38	-	-	25,26,27,28,29,30,31,32,33,34,35,36,37,38,39,40,41,42,43,44,45,46,47,48,49,50,51,52,53,54,55,56,57,58,59,60,61,62	-	25	24
CTTGAGGCCTTTCTTACCCAGAAG	CTTGAGGCCTTTCTTACCCAGAAG	var1277	24	0	0	38	-	-	25,26,27,28,29,30,31,32,33,34,35,36,37,38,39,40,41,42,43,44,45,46,47,48,49,50,51,52,53,54,55,56,57,58,59,60,61,62	-	25	24
CTTGAGGCCTTTCTTACCCAGAAG	CTTGAGGCCTTTCTTACCCAGAAG	var1278	24	0	0	38	-	-	25,26,27,28,29,30,31,32,33,34,35,36,37,38,39,40,41,42,43,44,45,46,47,48,49,50,51,52,53,54,55,56,57,58,59,60,61,62	-	25	24
CTTGAGGCCTTTCTTACCCAGAAG	CTTGAGGCCTTTCTTACCCAGAAG	var1323	24	0	0	38	-	-	25,26,27,28,29,30,31,32,33,34,35,36,37,38,39,40,41,42,43,44,45,46,47,48,49,50,51,52,53,54,55,56,57,58,59,60,61,62	-	25	24
CTTGAGGCCTTTCTTACCCAGAAG	CTTGAGGCCTTTCTTACCCAGAAG	var1342	24	0	0	38	-	-	25,26,27,28,29,30,31,32,33,34,35,36,37,38,39,40,41,42,43,44,45,46,47,48,49,50,51,52,53,54,55,56,57,58,59,60,61,62	-	25	24
CTTGAGGCCTTTCTTACCCAGAAG	CTTGAGGCCTTTCTTACCCAGAAG	var1364	24	0	0	38	-	-	25,26,27,28,29,30,31,32,33,34,35,36,37,38,39,40,41,42,43,44,45,46,47,48,49,50,51,52,53,54,55,56,57,58,59,60,61,62	-	25	24
CTTGAGGCCTTTCTTACCCAGAAG	CTTGAGGCCTTTCTTACCCAGAAG	var1420	24	0	0	38	-	-	25,26,27,28,29,30,31,32,33,34,35,36,37,38,39,40,41,42,43,44,45,46,47,48,49,50,51,52,53,54,55,56,57,58,59,60,61,62	-	25	24
CTTGAGGCCTTTCTTACCCAGAAG	CTTGAGGCCTTTCTTACCCAGAAG	var1479	24	0	0	38	-	-	25,26,27,28,29,30,31,32,33,34,35,36,37,38,39,40,41,42,43,44,45,46,47,48,49,50,51,52,53,54,55,56,57,58,59,60,61,62	-	25	24
CTTGAGGCCTTTCTTACCCAGAAG	CTTGAGGCCTTTCTTACCCAGAAG	var1480	24	0	0	38	-	-	25,26,27,28,29,30,31,32,33,34,35,36,37,38,39,40,41,42,43,44,45,46,47,48,49,50,51,52,53,54,55,56,57,58,59,60,61,62	-	25	24
CTTGAGGCCTTTCTTACCCAGAAG	CTTGAGGCCTTTCTTACCCAGAAG	var1493	24	0	0	38	-	-	25,26,27,28,29,30,31,32,33,34,35,36,37,38,39,40,41,42,43,44,45,46,47,48,49,50,51,52,53,54,55,56,57,58,59,60,61,62	-	25	24
CTTGAGGCCTTTCTTACCCAGAAG	CTTGAGGCCTTTCTTACCCAGAAG	var1524	24	0	0	38	-	-	25,26,27,28,29,30,31,32,33,34,35,36,37,38,39,40,41,42,43,44,45,46,47,48,49,50,51,52,53,54,55,56,57,58,59,60,61,62	-	25	24
CTTGAGGCCTTTCTTACCCAGAAG	CTTGAGGCCTTTCTTACCCAGAAG	var1605	24	0	0	38	-	-	25,26,27,28,29,30,31,32,33,34,35,36,37,38,39,40,41,42,43,44,45,46,47,48,49,50,51,52,53,54,55,56,57,58,59,60,61,62	-	25	24
CTTGAGGCCTTTCTTACCCAGAAG	CTTGAGGCCTTTCTTACCCAGAAG	var1636	24	0	0	38	-	-	25,26,27,28,29,30,31,32,33,34,35,36,37,38,39,40,41,42,43,44,45,46,47,48,49,50,51,52,53,54,55,56,57,58,59,60,61,62	-	25	24
CTTGAGGCCTTTCTTACCCAGAAG	CTTGAGGCCTTTCTTACCCAGAAG	var1645	24	0	0	38	-	-	25,26,27,28,29,30,31,32,33,34,35,36,37,38,39,40,41,42,43,44,45,46,47,48,49,50,51,52,53,54,55,56,57,58,59,60,61,62	-	25	24
CTTGAGGCCTTTCTTACCCAGAAG	CTTGAGGCCTTTCTTACCCAGAAG	var362	24	0	0	38	-	-	25,26,27,28,29,30,31,32,33,34,35,36,37,38,39,40,41,42,43,44,45,46,47,48,49,50,51,52,53,54,55,56,57,58,59,60,61,62	-	25	24
CTTGAGGCCTTTCTTACCCAGAAG	CTTGAGGCCTTTCTTACCCAGAAG	var422	24	0	0	38	-	-	25,26,27,28,29,30,31,32,33,34,35,36,37,38,39,40,41,42,43,44,45,46,47,48,49,50,51,52,53,54,55,56,57,58,59,60,61,62	-	25	24
CTTGAGGCCTTTCTTACCCAGAAG	CTTGAGGCCTTTCTTACCCAGAAG	var644	24	0	0	38	-	-	25,26,27,28,29,30,31,32,33,34,35,36,37,38,39,40,41,42,43,44,45,46,47,48,49,50,51,52,53,54,55,56,57,58,59,60,61,62	-	25	24
CTTGAGGCCTTTCTTACCCAGAAG	CTTGAGGCCTTTCTTACCCAGAAG	var721	24	0	0	38	-	-	25,26,27,28,29,30,31,32,33,34,35,36,37,38,39,40,41,42,43,44,45,46,47,48,49,50,51,52,53,54,55,56,57,58,59,60,61,62	-	25	24
CTTGAGGCCTTTCTTACCCAGAAG	CTTGAGGCCTTTCTTACCCAGAAG	var842	24	0	0	38	-	-	25,26,27,28,29,30,31,32,33,34,35,36,37,38,39,40,41,42,43,44,45,46,47,48,49,50,51,52,53,54,55,56,57,58,59,60,61,62	-	25	24
CTTGAGGCCTTTCTTACCCAGAAG	CTTGAGGCCTTTCTTACCCAGAAG	var888	24	0	0	38	-	-	25,26,27,28,29,30,31,32,33,34,35,36,37,38,39,40,41,42,43,44,45,46,47,48,49,50,51,52,53,54,55,56,57,58,59,60,61,62	-	25	24
CTTGAGGCCTTTCTTACCCAGAAG	CTTGAGGCCTTTCTTACCCAGAAG	var931	24	0	0	38	-	-	25,26,27,28,29,30,31,32,33,34,35,36,37,38,39,40,41,42,43,44,45,46,47,48,49,50,51,52,53,54,55,56,57,58,59,60,61,62	-	25	24
CTTGAGGCCTTTCTTACCCAGAAG----------------TGAAGGATGACGACTTTGAGAA	CTTGAGGCCTTTCTTACCCAGAAGCAGAAGGTGGGAGAACTGAAGGATGACGACTTTGAGAA	var658	24-C-A-G-A-A-G-G-T-G-G-G-A-G-A-A-C22	0	0	16	-	-	25,26,27,28,29,30,31,32,33,34,35,36,37,38,39,40		25	62
CTTGAGGCCTTTCTTACCCAGAAG---------------CTGAAGGATGACGACTTTGAGAA	CTTGAGGCCTTTCTTACCCAGAAGCAGAAGGTGGGAGAACTGAAGGATGACGACTTTGAGAA	var72	24-C-A-G-A-A-G-G-T-G-G-G-A-G-A-A23	0	0	15	-	-	25,26,27,28,29,30,31,32,33,34,35,36,37,38,39		25	62
CTTGAGGCCTTTCTTACCCAGAAG--------------ACTGAAGGATGACGACTTTGAGAA	CTTGAGGCCTTTCTTACCCAGAAGCAGAAGGTGGGAGAACTGAAGGATGACGACTTTGAGAA	var238	24-C-A-G-A-A-G-G-T-G-G-G-A-G-A24	0	0	14	-	-	25,26,27,28,29,30,31,32,33,34,35,36,37,38		25	62
CTTGAGGCCTTTCTTACCCAGAAG-------------AACTGAAGGATG-GGACTTTGAGAA	CTTGAGGCCTTTCTTACCCAGAAGCAGAAGGTGGGAGAACTGAAGGATGACGACTTTGAGAA	var1547	24-C-A-G-A-A-G-G-T-G-G-G-A-G12-AGC11	1	0	14	51	-	25,26,27,28,29,30,31,32,33,34,35,36,37,50		25	62
CTTGAGGCCTTTCTTACCCAGAAG-------------AACTGAAGGATGACGACTTTGAGAA	CTTGAGGCCTTTCTTACCCAGAAGCAGAAGGTGGGAGAACTGAAGGATGACGACTTTGAGAA	var15	24-C-A-G-A-A-G-G-T-G-G-G-A-G25	0	0	13	-	-	25,26,27,28,29,30,31,32,33,34,35,36,37		25	62
CTTGAGGCCTTTCTTACCCAGAAG-----------AGAACTGAAGGATGACGACTTTGAGAA	CTTGAGGCCTTTCTTACCCAGAAGCAGAAGGTGGGAGAACTGAAGGATGACGACTTTGAGAA	var49	24-C-A-G-A-A-G-G-T-G-G-G27	0	0	11	-	-	25,26,27,28,29,30,31,32,33,34,35		25	62
CTTGAGGCCTTTCTTACCCAGAAG----------GAGAACTGAAGGATGACGACTTTGAGAA	CTTGAGGCCTTTCTTACCCAGAAGCAGAAGGTGGGAGAACTGAAGGATGACGACTTTGAGAA	var58	24-C-A-G-A-A-G-G-T-G-G28	0	0	10	-	-	25,26,27,28,29,30,31,32,33,34		25	62
CTTGAGGCCTTTCTTACCCAGAAG---------GGAGAACTGAAGGATGACGACTTTGAGAA	CTTGAGGCCTTTCTTACCCAGAAGCAGAAGGTGGGAGAACTGAAGGATGACGACTTTGAGAA	var117	24-C-A-G-A-A-G-G-T-G29	0	0	9	-	-	25,26,27,28,29,30,31,32,33		25	62
CTTGAGGCCTTTCTTACCCAGAAG--------GTAAGAACTGAAGGATGACGACTTTGAGAA	CTTGAGGCCTTTCTTACCCAGAAGCAGAAGGTGGGAGAACTGAAGGATGACGACTTTGAGAA	var1494	24-C-A-G-A-A-G-G-T1TGAG27	2	0	8	34,35	-	25,26,27,28,29,30,31,32		25	62
CTTGAGGCCTTTCTTACCCAGAAG-------TGGGAGAACTGAAGGATGACGACTTTGAGAA	CTTGAGGCCTTTCTTACCCAGAAGCAGAAGGTGGGAGAACTGAAGGATGACGACTTTGAGAA	var39	24-C-A-G-A-A-G-G31	0	0	7	-	-	25,26,27,28,29,30,31		25	62
CTTGAGGCCTTTCTTACCCAGAAG------GCGGGAGAACTGAAGGATGACGACTTTGAGAA	CTTGAGGCCTTTCTTACCCAGAAGCAGAAGGTGGGAGAACTGAAGGATGACGACTTTGAGAA	var909	24-C-A-G-A-A-G1CT30	1	0	6	32	-	25,26,27,28,29,30		25	62
CTTGAGGCCTTTCTTACCCAGAAG------GGGGGAGAACTGAAGGATGACGACTTTGAGAA	CTTGAGGCCTTTCTTACCCAGAAGCAGAAGGTGGGAGAACTGAAGGATGACGACTTTGAGAA	var877	24-C-A-G-A-A-G1GT30	1	0	6	32	-	25,26,27,28,29,30		25	62
CTTGAGGCCTTTCTTACCCAGAAG------GTAAGAGAACTGAAGGATGACGACTTTGAGAA	CTTGAGGCCTTTCTTACCCAGAAGCAGAAGGTGGGAGAACTGAAGGATGACGACTTTGAGAA	var1304	24-C-A-G-A-A-G2AGAG28	2	0	6	33,34	-	25,26,27,28,29,30		25	62
CTTGAGGCCTTTCTTACCCAGAAG------GTGAGAGAACTGAAGGATGACGACTTTGAGAA	CTTGAGGCCTTTCTTACCCAGAAGCAGAAGGTGGGAGAACTGAAGGATGACGACTTTGAGAA	var1132	24-C-A-G-A-A-G3AG28	1	0	6	34	-	25,26,27,28,29,30		25	62
CTTGAGGCCTTTCTTACCCAGAAG------GTGGAGAGAACTGAAGGATGACGACTTTGAGAA	CTTGAGGCCTTTCTTACCCAGAAGCAGAAGGTGG-GAGAACTGAAGGATGACGACTTTGAGAA	var575	24-C-A-G-A-A-G4A-28	0	1	0	-	35	-	35		63
CTTGAGGCCTTTCTTACCCAGAAG------GTGGGAGAACCGAAGGATGACGACTTTGAGAA	CTTGAGGCCTTTCTTACCCAGAAGCAGAAGGTGGGAGAACTGAAGGATGACGACTTTGAGAA	var880	24-C-A-G-A-A-G10CT21	1	0	6	41	-	25,26,27,28,29,30		25	62
CTTGAGGCCTTTCTTACCCAGAAG------GTGGGAGAACTAAAGGATGACGACTTTGAGAA	CTTGAGGCCTTTCTTACCCAGAAGCAGAAGGTGGGAGAACTGAAGGATGACGACTTTGAGAA	var537	24-C-A-G-A-A-G11AG20	1	0	6	42	-	25,26,27,28,29,30		25	62
CTTGAGGCCTTTCTTACCCAGAAG------GTGGGAGAACTGACGGATGACGACTTTGAGAA	CTTGAGGCCTTTCTTACCCAGAAGCAGAAGGTGGGAGAACTGAAGGATGACGACTTTGAGAA	var1600	24-C-A-G-A-A-G13CA18	1	0	6	44	-	25,26,27,28,29,30		25	62
CTTGAGGCCTTTCTTACCCAGAAG------GTGGGAGAACTGAGGGATGACGACTTTGAGAA	CTTGAGGCCTTTCTTACCCAGAAGCAGAAGGTGGGAGAACTGAAGGATGACGACTTTGAGAA	var957	24-C-A-G-A-A-G13GA18	1	0	6	44	-	25,26,27,28,29,30		25	62
CTTGAGGCCTTTCTTACCCAGAAG------GTGGGAGAACTGCAGGATGACGACTTTGAGAA	CTTGAGGCCTTTCTTACCCAGAAGCAGAAGGTGGGAGAACTGAAGGATGACGACTTTGAGAA	var1473	24-C-A-G-A-A-G12CA19	1	0	6	43	-	25,26,27,28,29,30		25	62
CTTGAGGCCTTTCTTACCCAGAAG------GTGGGAGAACTGGAGGATGACGACTTTGAGAA	CTTGAGGCCTTTCTTACCCAGAAGCAGAAGGTGGGAGAACTGAAGGATGACGACTTTGAGAA	var1225	24-C-A-G-A-A-G12GA19	1	0	6	43	-	25,26,27,28,29,30		25	62
CTTGAGGCCTTTCTTACCCAGAAG------GTGGGAGAGCTGAAGGATGACGACTTTGAGAA	CTTGAGGCCTTTCTTACCCAGAAGCAGAAGGTGGGAGAACTGAAGGATGACGACTTTGAGAA	var1208	24-C-A-G-A-A-G8GA23	1	0	6	39	-	25,26,27,28,29,30		25	62
CTTGAGGCCTTTCTTACCCAGAAG------GTGGGAGGACTGAAGGATGACGACTTTGAGAA	CTTGAGGCCTTTCTTACCCAGAAGCAGAAGGTGGGAGAACTGAAGGATGACGACTTTGAGAA	var879	24-C-A-G-A-A-G7GA24	1	0	6	38	-	25,26,27,28,29,30		25	62
CTTGAGGCCTTTCTTACCCAGAAG------GTGGGCGAACTGAAGGATGACGACTTTGAGAA	CTTGAGGCCTTTCTTACCCAGAAGCAGAAGGTGGGAGAACTGAAGGATGACGACTTTGAGAA	var1303	24-C-A-G-A-A-G5CA26	1	0	6	36	-	25,26,27,28,29,30		25	62
CTTGAGGCCTTTCTTACCCAGAAG------GTGGGGGAACTGAAGGATGACGACTTTGAGAA	CTTGAGGCCTTTCTTACCCAGAAGCAGAAGGTGGGAGAACTGAAGGATGACGACTTTGAGAA	var667	24-C-A-G-A-A-G5GA26	1	0	6	36	-	25,26,27,28,29,30		25	62
CTTGAGGCCTTTCTTACCCAGAAG-----GGTAAGAGAACTGAAGGATGACGACTTTGAGAA	CTTGAGGCCTTTCTTACCCAGAAGCAGAAGGTGGGAGAACTGAAGGATGACGACTTTGAGAA	var1237	24-C-A-G-A-A3AGAG28	2	0	5	33,34	-	25,26,27,28,29		25	62
CTTGAGGCCTTTCTTACCCAGAAG-----GGTGGGAGAACTGAAGGATGACGACTTTGAGAA	CTTGAGGCCTTTCTTACCCAGAAGCAGAAGGTGGGAGAACTGAAGGATGACGACTTTGAGAA	var939	24-C-A-G-A-A33	0	0	5	-	-	25,26,27,28,29		25	62
CTTGAGGCCTTTCTTACCCAGAAG----AGGTGGGAGAACTGAAGGATGACGACTTTGAGAA	CTTGAGGCCTTTCTTACCCAGAAGCAGAAGGTGGGAGAACTGAAGGATGACGACTTTGAGAA	var275	24-C-A-G-A34	0	0	4	-	-	25,26,27,28		25	62
CTTGAGGCCTTTCTTACCCAGAAG---AAACTGGGAGAACTGAAGGATGACGACTTTGAGAA	CTTGAGGCCTTTCTTACCCAGAAGCAGAAGGTGGGAGAACTGAAGGATGACGACTTTGAGAA	var495	24-C-A-G2AGCG31	2	0	3	30,31	-	25,26,27		25	62
CTTGAGGCCTTTCTTACCCAGAAG---AAAGTGGGAGAACTGAAGGATGACGACTTTGAGAA	CTTGAGGCCTTTCTTACCCAGAAGCAGAAGGTGGGAGAACTGAAGGATGACGACTTTGAGAA	var292	24-C-A-G2AG32	1	0	3	30	-	25,26,27		25	62
CTTGAGGCCTTTCTTACCCAGAAG---AAGGAGGGAGAACTGAAGGATGACGACTTTGAGAA	CTTGAGGCCTTTCTTACCCAGAAGCAGAAGGTGGGAGAACTGAAGGATGACGACTTTGAGAA	var1469	24-C-A-G4AT30	1	0	3	32	-	25,26,27		25	62
CTTGAGGCCTTTCTTACCCAGAAG---AAGGTGGGAGAACTGAAGGATGACGACTTTGAGAA	CTTGAGGCCTTTCTTACCCAGAAGCAGAAGGTGGGAGAACTGAAGGATGACGACTTTGAGAA	var27	24-C-A-G35	0	0	3	-	-	25,26,27		25	62
CTTGAGGCCTTTCTTACCCAGAAG--AAAGTTCTTCTTTCAGGAGAACTGAAGGATGACGACTT	CTTGAGGCCTTTCTTACCCAGAAGCAGAAGGT--------GGGAGAACTGAAGGATGACGACTT	var784	24-C-AAG3TG1C-T-T-C-T-T-T-C-AG23	3	8	2	27,31,41	33,34,35,36,37,38,39,40	25,26	33	25	64
CTTGAGGCCTTTCTTACCCAGAAG-AGAAAG--GGAGAACTGAAGGATGACGACTTTGAGAA	CTTGAGGCCTTTCTTACCCAGAAGCAGAAGGTGGGAGAACTGAAGGATGACGACTTTGAGAA	var1077	24-C4AG1-T-G29	1	0	3	30	-	25,32,33		25	62
CTTGAGGCCTTTCTTACCCAGAAG-AGAGAAGTGGGAGAACTGAAGGATGACGACTTTGAGAA	CTTGAGGCCTTTCTTACCCAGAAGCAGA-AGGTGGGAGAACTGAAGGATGACGACTTTGAGAA	var1649	24-C3G-1AG32	1	1	0	31	29	-	29		63
CTTGAGGCCTTTCTTACCCAGAAGA---------GAGAACTGAAGGATGACGACTTTGAGAA	CTTGAGGCCTTTCTTACCCAGAAGCAGAAGGTGGGAGAACTGAAGGATGACGACTTTGAGAA	var455	24AC-A-G-A-A-G-G-T-G-G28	1	0	9	25	-	26,27,28,29,30,31,32,33,34		26	62
CTTGAGGCCTTTCTTACCCAGAAGA------TGGGAGAACTGAAGGATGACGACTTTGAGAA	CTTGAGGCCTTTCTTACCCAGAAGCAGAAGGTGGGAGAACTGAAGGATGACGACTTTGAGAA	var1300	24AC-A-G-A-A-G-G31	1	0	6	25	-	26,27,28,29,30,31		26	62
CTTGAGGCCTTTCTTACCCAGAAGAA------------ACTGAAGGATGACGACTTTGAGAA	CTTGAGGCCTTTCTTACCCAGAAGCAGAAGGTGGGAGAACTGAAGGATGACGACTTTGAGAA	var1159	24AC1-G-A-A-G-G-T-G-G-G-A-G-A24	1	0	12	25	-	27,28,29,30,31,32,33,34,35,36,37,38		27	62
CTTGAGGCCTTTCTTACCCAGAAGAA---------AGAACTGAAGGATGACGACTTTGAGAA	CTTGAGGCCTTTCTTACCCAGAAGCAGAAGGTGGGAGAACTGAAGGATGACGACTTTGAGAA	var315	24AC1-G-A-A-G-G-T-G-G-G27	1	0	9	25	-	27,28,29,30,31,32,33,34,35		27	62
CTTGAGGCCTTTCTTACCCAGAAGAA--AGG--GTAGAACTGAAGGATGACGACTTTGAGAA	CTTGAGGCCTTTCTTACCCAGAAGCAGAAGGTGGGAGAACTGAAGGATGACGACTTTGAGAA	var1140	24AC1-G-A3-T-G1TG27	2	0	4	25,35	-	27,28,32,33		27	62
CTTGAGGCCTTTCTTACCCAGAAGAA--AGGTGGGAGAACTGAAGGATGACGACTTTGAGAA	CTTGAGGCCTTTCTTACCCAGAAGCAGAAGGTGGGAGAACTGAAGGATGACGACTTTGAGAA	var71	24AC1-G-A34	1	0	2	25	-	27,28		27	62
CTTGAGGCCTTTCTTACCCAGAAGAA-AGGTTGGGAGAACTGAAGGATGACGACTTTGAGAA	CTTGAGGCCTTTCTTACCCAGAAGCAGAAGGTGGGAGAACTGAAGGATGACGACTTTGAGAA	var1290	24AC1-G1GA1TG31	3	0	1	25,29,31	-	27		27	62
CTTGAGGCCTTTCTTACCCAGAAGAAA-------GAGAACTGAAGGATGACGACTTTGAGAA	CTTGAGGCCTTTCTTACCCAGAAGCAGAAGGTGGGAGAACTGAAGGATGACGACTTTGAGAA	var1386	24AC1AG-A-A-G-G-T-G-G28	2	0	7	25,27	-	28,29,30,31,32,33,34		28	62
CTTGAGGCCTTTCTTACCCAGAAGAAA------GGAGAACTGAAGGATGACGACTTTGAGAA	CTTGAGGCCTTTCTTACCCAGAAGCAGAAGGTGGGAGAACTGAAGGATGACGACTTTGAGAA	var482	24AC1AG-A-A-G-G-T-G29	2	0	6	25,27	-	28,29,30,31,32,33		28	62
CTTGAGGCCTTTCTTACCCAGAAGAAA-----GGGAGAACTGAAGGATGACGACTTTGAGAA	CTTGAGGCCTTTCTTACCCAGAAGCAGAAGGTGGGAGAACTGAAGGATGACGACTTTGAGAA	var762	24AC1AG-A-A-G-G-T30	2	0	5	25,27	-	28,29,30,31,32		28	62
CTTGAGGCCTTTCTTACCCAGAAGAAAACTGTGGGAGAACTGAAGGATGACGACTTTGAGAA	CTTGAGGCCTTTCTTACCCAGAAGCAGAAGGTGGGAGAACTGAAGGATGACGACTTTGAGAA	var1325	24AC1AG1CATG32	4	0	0	25,27,29,30	-	-			62
CTTGAGGCCTTTCTTACCCAGAAGAAACTGAAGGTGGGAGAACTGAAGGATGACGACTTTGA	CTTGAGGCCTTTCTTACCCAGAAGCA---GAAGGTGGGAGAACTGAAGGATGACGACTTTGA	var1506	24AC1A-C-T-33	1	3	0	25	27,28,29	-	27		62
CTTGAGGCCTTTCTTACCCAGAAGAAACTTGAGGTGGGAGAACTGAAGGATGACGACTTTGA	CTTGAGGCCTTTCTTACCCAGAAGCAGA---AGGTGGGAGAACTGAAGGATGACGACTTTGA	var1414	24AC1AGCAT-T-G-31	3	3	0	25,27,28	29,30,31	-	29		62
CTTGAGGCCTTTCTTACCCAGAAGAAAGAAAGAAGGTGGGAGAACTGAAGGATGACGACTTT	CTTGAGGCCTTTCTTACCCAGAAGCA-----GAAGGTGGGAGAACTGAAGGATGACGACTTT	var1324	24AC1A-G-A-A-A-31	1	5	0	25	27,28,29,30,31	-	27		62
CTTGAGGCCTTTCTTACCCAGAAGAAAGAACTGGGAGAACTGAAGGATGACGACTTTGAGAA	CTTGAGGCCTTTCTTACCCAGAAGCAGAAGGTGGGAGAACTGAAGGATGACGACTTTGAGAA	var1466	24AC1AGGA1AGCG31	5	0	0	25,27,28,30,31	-	-			62
CTTGAGGCCTTTCTTACCCAGAAGAAAGAAGGTGGGAGAACTGAAGGATGACGACTTTGAGA	CTTGAGGCCTTTCTTACCCAGAAGCA-GAAGGTGGGAGAACTGAAGGATGACGACTTTGAGA	var701	24AC1A-35	1	1	0	25	27	-	27		62
CTTGAGGCCTTTCTTACCCAGAAGAAAGGTAAGAACTGAAGGTGGGAGAACTGAAGGATGAC	CTTGAGGCCTTTCTTACCCAGAAGCA-----------GAAGGTGGGAGAACTGAAGGATGAC	var1048	24AC1A-G-G-T-A-A-G-A-A-C-T-25	1	11	0	25	27,28,29,30,31,32,33,34,35,36,37	-	27		62
CTTGAGGCCTTTCTTACCCAGAAGAAC----TGGGAGAACTGAAGGATGACGACTTTGAGAA	CTTGAGGCCTTTCTTACCCAGAAGCAGAAGGTGGGAGAACTGAAGGATGACGACTTTGAGAA	var579	24AC1CG-A-A-G-G31	2	0	4	25,27	-	28,29,30,31		28	62
CTTGAGGCCTTTCTTACCCAGAAGAACT-----GGAGAACTGAAGGATGACGACTTTGAGAA	CTTGAGGCCTTTCTTACCCAGAAGCAGAAGGTGGGAGAACTGAAGGATGACGACTTTGAGAA	var1363	24AC1CGTA-A-G-G-T-G29	3	0	5	25,27,28	-	29,30,31,32,33		29	62
CTTGAGGCCTTTCTTACCCAGAAGAACTGAAGATGGGAGAACTGAAGGATGACGACTTTGAG	CTTGAGGCCTTTCTTACCCAGAAGCA--GAAGGTGGGAGAACTGAAGGATGACGACTTTGAG	var1021	24AC1C-T-4AG29	2	2	0	25,33	27,28	-	27		62
CTTGAGGCCTTTCTTACCCAGAAGAACTGAAGGTGGGAGAACTGAAGGATGACGACTTTGAG	CTTGAGGCCTTTCTTACCCAGAAGCA--GAAGGTGGGAGAACTGAAGGATGACGACTTTGAG	var1561	24AC1C-T-34	1	2	0	25	27,28	-	27		62
CTTGAGGCCTTTCTTACCCAGAAGAACTGCTTCAGTTCTGGGAGAACTGAAGGATGACGACT	CTTGAGGCCTTTCTTACCCAGAA-----GCAGAAG--GTGGGAGAACTGAAGGATGACGACT	var1427	23G-A-A-C-T-2TATGCA2T-T-CG24	4	7	0	31,32,33,38	24,25,26,27,28,36,37	-	24		62
CTTGAGGCCTTTCTTACCCAGAAGAACTGGGTGGGAGAACTGAAGGATGACGACTTTGAGAA	CTTGAGGCCTTTCTTACCCAGAAGCAGAAGGTGGGAGAACTGAAGGATGACGACTTTGAGAA	var791	24AC1CGTAGA33	4	0	0	25,27,28,29	-	-			62
CTTGAGGCCTTTCTTACCCAGAAGAAG	CTTGAGGCCTTTCTTACCCAGAAGCAG	var127	24AC2	1	0	0	25	-	-			27
CTTGAGGCCTTTCTTACCCAGAAGAAG------GGAGAACTGAAGGATGACGACTTTGAGAA	CTTGAGGCCTTTCTTACCCAGAAGCAGAAGGTGGGAGAACTGAAGGATGACGACTTTGAGAA	var772	24AC2-A-A-G-G-T-G29	1	0	6	25	-	28,29,30,31,32,33		28	62
CTTGAGGCCTTTCTTACCCAGAAGAAG----TGGGAGAACTGAAGGATGACGACTTTGAGAA	CTTGAGGCCTTTCTTACCCAGAAGCAGAAGGTGGGAGAACTGAAGGATGACGACTTTGAGAA	var544	24AC2-A-A-G-G31	1	0	4	25	-	28,29,30,31		28	62
CTTGAGGCCTTTCTTACCCAGAAGAAGA--------GAACTGAAGGATGACGACTTTGAGAA	CTTGAGGCCTTTCTTACCCAGAAGCAGAAGGTGGGAGAACTGAAGGATGACGACTTTGAGAA	var1014	24AC3-A-G-G-T-G-G-G-A26	1	0	8	25	-	29,30,31,32,33,34,35,36		29	62
CTTGAGGCCTTTCTTACCCAGAAGAAGA-GGTGGGAGAACTGAAGGATGACGACTTTGAGAA	CTTGAGGCCTTTCTTACCCAGAAGCAGAAGGTGGGAGAACTGAAGGATGACGACTTTGAGAA	var727	24AC3-A33	1	0	1	25	-	29		29	62
CTTGAGGCCTTTCTTACCCAGAAGAAGAA----------CTGAAGGATGACGACTTTGAGAA	CTTGAGGCCTTTCTTACCCAGAAGCAGAAGGTGGGAGAACTGAAGGATGACGACTTTGAGAA	var283	24AC4-G-G-T-G-G-G-A-G-A-A23	1	0	10	25	-	30,31,32,33,34,35,36,37,38,39		30	62
CTTGAGGCCTTTCTTACCCAGAAGAAGAAAGGTGGGAGAACTGAAGGATGACGACTTTGAGA	CTTGAGGCCTTTCTTACCCAGAAGCAGAA-GGTGGGAGAACTGAAGGATGACGACTTTGAGA	var435	24AC4A-32	1	1	0	25	30	-	30		62
CTTGAGGCCTTTCTTACCCAGAAGAAGAAGAAGGTGGGAGAACTGAAGGATGACGACTTTGA	CTTGAGGCCTTTCTTACCCAGAAGCAGAA---GGTGGGAGAACTGAAGGATGACGACTTTGA	var1007	24AC4G-A-A-30	1	3	0	25	30,31,32	-	30		62
CTTGAGGCCTTTCTTACCCAGAAGAAGAAGGTGGGAGAACTGAAGGATGACGACTTTGAGAA	CTTGAGGCCTTTCTTACCCAGAAGCAGAAGGTGGGAGAACTGAAGGATGACGACTTTGAGAA	var79	24AC37	1	0	0	25	-	-			62
CTTGAGGCCTTTCTTACCCAGAAGAAGAAGGTGGGAGAACTGAAGGATGACGCCTTTGAGAA	CTTGAGGCCTTTCTTACCCAGAAGCAGAAGGTGGGAGAACTGAAGGATGACGACTTTGAGAA	var1370	24AC27CA9	2	0	0	25,53	-	-			62
CTTGAGGCCTTTCTTACCCAGAAGAAGCAGGTGGGAGAACTGAAGGATGACGACTTTGAGAA	CTTGAGGCCTTTCTTACCCAGAAGCAGAAGGTGGGAGAACTGAAGGATGACGACTTTGAGAA	var518	24AC2CA34	2	0	0	25,28	-	-			62
CTTGAGGCCTTTCTTACCCAGAAGAGGTAAAGCAGGTGGGAGAACTGAAGGATGACGACTTT	CTTGAGGCCTTTCTTACCCAGAAGC-----AGAAGGTGGGAGAACTGAAGGATGACGACTTT	var1105	24ACG-G-T-A-A-2CA29	2	5	0	25,32	26,27,28,29,30	-	26		62
CTTGAGGCCTTTCTTACCCAGAAGC	CTTGAGGCCTTTCTTACCCAGAAGC	var1060	25	0	0	37	-	-	26,27,28,29,30,31,32,33,34,35,36,37,38,39,40,41,42,43,44,45,46,47,48,49,50,51,52,53,54,55,56,57,58,59,60,61,62	-	26	25
CTTGAGGCCTTTCTTACCCAGAAGC	CTTGAGGCCTTTCTTACCCAGAAGC	var1088	25	0	0	37	-	-	26,27,28,29,30,31,32,33,34,35,36,37,38,39,40,41,42,43,44,45,46,47,48,49,50,51,52,53,54,55,56,57,58,59,60,61,62	-	26	25
CTTGAGGCCTTTCTTACCCAGAAGC	CTTGAGGCCTTTCTTACCCAGAAGC	var1217	25	0	0	37	-	-	26,27,28,29,30,31,32,33,34,35,36,37,38,39,40,41,42,43,44,45,46,47,48,49,50,51,52,53,54,55,56,57,58,59,60,61,62	-	26	25
CTTGAGGCCTTTCTTACCCAGAAGC	CTTGAGGCCTTTCTTACCCAGAAGC	var1280	25	0	0	37	-	-	26,27,28,29,30,31,32,33,34,35,36,37,38,39,40,41,42,43,44,45,46,47,48,49,50,51,52,53,54,55,56,57,58,59,60,61,62	-	26	25
CTTGAGGCCTTTCTTACCCAGAAGC	CTTGAGGCCTTTCTTACCCAGAAGC	var1344	25	0	0	37	-	-	26,27,28,29,30,31,32,33,34,35,36,37,38,39,40,41,42,43,44,45,46,47,48,49,50,51,52,53,54,55,56,57,58,59,60,61,62	-	26	25
CTTGAGGCCTTTCTTACCCAGAAGC	CTTGAGGCCTTTCTTACCCAGAAGC	var1575	25	0	0	37	-	-	26,27,28,29,30,31,32,33,34,35,36,37,38,39,40,41,42,43,44,45,46,47,48,49,50,51,52,53,54,55,56,57,58,59,60,61,62	-	26	25
CTTGAGGCCTTTCTTACCCAGAAGC	CTTGAGGCCTTTCTTACCCAGAAGC	var522	25	0	0	37	-	-	26,27,28,29,30,31,32,33,34,35,36,37,38,39,40,41,42,43,44,45,46,47,48,49,50,51,52,53,54,55,56,57,58,59,60,61,62	-	26	25
CTTGAGGCCTTTCTTACCCAGAAGC	CTTGAGGCCTTTCTTACCCAGAAGC	var554	25	0	0	37	-	-	26,27,28,29,30,31,32,33,34,35,36,37,38,39,40,41,42,43,44,45,46,47,48,49,50,51,52,53,54,55,56,57,58,59,60,61,62	-	26	25
CTTGAGGCCTTTCTTACCCAGAAGC	CTTGAGGCCTTTCTTACCCAGAAGC	var597	25	0	0	37	-	-	26,27,28,29,30,31,32,33,34,35,36,37,38,39,40,41,42,43,44,45,46,47,48,49,50,51,52,53,54,55,56,57,58,59,60,61,62	-	26	25
CTTGAGGCCTTTCTTACCCAGAAGC	CTTGAGGCCTTTCTTACCCAGAAGC	var607	25	0	0	37	-	-	26,27,28,29,30,31,32,33,34,35,36,37,38,39,40,41,42,43,44,45,46,47,48,49,50,51,52,53,54,55,56,57,58,59,60,61,62	-	26	25
CTTGAGGCCTTTCTTACCCAGAAGC--------------CTGAAGGATGACGACTTTGAGAA	CTTGAGGCCTTTCTTACCCAGAAGCAGAAGGTGGGAGAACTGAAGGATGACGACTTTGAGAA	var295	25-A-G-A-A-G-G-T-G-G-G-A-G-A-A23	0	0	14	-	-	26,27,28,29,30,31,32,33,34,35,36,37,38,39		26	62
CTTGAGGCCTTTCTTACCCAGAAGC-------------ACTGAAGGATGACGACTTTGAGAA	CTTGAGGCCTTTCTTACCCAGAAGCAGAAGGTGGGAGAACTGAAGGATGACGACTTTGAGAA	var22	25-A-G-A-A-G-G-T-G-G-G-A-G-A24	0	0	13	-	-	26,27,28,29,30,31,32,33,34,35,36,37,38		26	62
CTTGAGGCCTTTCTTACCCAGAAGC------------AACTGAAGGATGACGACTTTGAGAA	CTTGAGGCCTTTCTTACCCAGAAGCAGAAGGTGGGAGAACTGAAGGATGACGACTTTGAGAA	var192	25-A-G-A-A-G-G-T-G-G-G-A-G25	0	0	12	-	-	26,27,28,29,30,31,32,33,34,35,36,37		26	62
CTTGAGGCCTTTCTTACCCAGAAGC-----------GAACTGAAGGATGACGACTTTGAGAA	CTTGAGGCCTTTCTTACCCAGAAGCAGAAGGTGGGAGAACTGAAGGATGACGACTTTGAGAA	var428	25-A-G-A-A-G-G-T-G-G-G-A26	0	0	11	-	-	26,27,28,29,30,31,32,33,34,35,36		26	62
CTTGAGGCCTTTCTTACCCAGAAGC----------AGAACCGAAGGATGACGACTTTGAGAA	CTTGAGGCCTTTCTTACCCAGAAGCAGAAGGTGGGAGAACTGAAGGATGACGACTTTGAGAA	var835	25-A-G-A-A-G-G-T-G-G-G5CT21	1	0	10	41	-	26,27,28,29,30,31,32,33,34,35		26	62
CTTGAGGCCTTTCTTACCCAGAAGC----------AGAACT---GGATGACGACTTTGAGAA	CTTGAGGCCTTTCTTACCCAGAAGCAGAAGGTGGGAGAACTGAAGGATGACGACTTTGAGAA	var1618	25-A-G-A-A-G-G-T-G-G-G6-G-A-A18	0	0	13	-	-	26,27,28,29,30,31,32,33,34,35,42,43,44		26	62
CTTGAGGCCTTTCTTACCCAGAAGC----------AGAACTAAAGGATGACGACTTTGAGAA	CTTGAGGCCTTTCTTACCCAGAAGCAGAAGGTGGGAGAACTGAAGGATGACGACTTTGAGAA	var657	25-A-G-A-A-G-G-T-G-G-G6AG20	1	0	10	42	-	26,27,28,29,30,31,32,33,34,35		26	62
CTTGAGGCCTTTCTTACCCAGAAGC----------AGAACTG--GGATGACGACTTTGAGAA	CTTGAGGCCTTTCTTACCCAGAAGCAGAAGGTGGGAGAACTGAAGGATGACGACTTTGAGAA	var1503	25-A-G-A-A-G-G-T-G-G-G7-A-A18	0	0	12	-	-	26,27,28,29,30,31,32,33,34,35,43,44		26	62
CTTGAGGCCTTTCTTACCCAGAAGC----------AGAACTGAA-GATGACGACTTTGAGAA	CTTGAGGCCTTTCTTACCCAGAAGCAGAAGGTGGGAGAACTGAAGGATGACGACTTTGAGAA	var396	25-A-G-A-A-G-G-T-G-G-G9-G17	0	0	11	-	-	26,27,28,29,30,31,32,33,34,35,45		26	62
CTTGAGGCCTTTCTTACCCAGAAGC----------AGAACTGAAAGATGACGACTTTGAGAA	CTTGAGGCCTTTCTTACCCAGAAGCAGAAGGTGGGAGAACTGAAGGATGACGACTTTGAGAA	var1523	25-A-G-A-A-G-G-T-G-G-G9AG17	1	0	10	45	-	26,27,28,29,30,31,32,33,34,35		26	62
CTTGAGGCCTTTCTTACCCAGAAGC----------AGAACTGAAGAATGACGACTTTGAGAA	CTTGAGGCCTTTCTTACCCAGAAGCAGAAGGTGGGAGAACTGAAGGATGACGACTTTGAGAA	var1413	25-A-G-A-A-G-G-T-G-G-G10AG16	1	0	10	46	-	26,27,28,29,30,31,32,33,34,35		26	62
CTTGAGGCCTTTCTTACCCAGAAGC----------AGAACTGAAGGAAGACGACTTTGAGAA	CTTGAGGCCTTTCTTACCCAGAAGCAGAAGGTGGGAGAACTGAAGGATGACGACTTTGAGAA	var1571	25-A-G-A-A-G-G-T-G-G-G12AT14	1	0	10	48	-	26,27,28,29,30,31,32,33,34,35		26	62
CTTGAGGCCTTTCTTACCCAGAAGC----------AGAACTGAAGGACGACGACTTTGAGAA	CTTGAGGCCTTTCTTACCCAGAAGCAGAAGGTGGGAGAACTGAAGGATGACGACTTTGAGAA	var999	25-A-G-A-A-G-G-T-G-G-G12CT14	1	0	10	48	-	26,27,28,29,30,31,32,33,34,35		26	62
CTTGAGGCCTTTCTTACCCAGAAGC----------AGAACTGAAGGATAACGACTTTGAGAA	CTTGAGGCCTTTCTTACCCAGAAGCAGAAGGTGGGAGAACTGAAGGATGACGACTTTGAGAA	var998	25-A-G-A-A-G-G-T-G-G-G13AG13	1	0	10	49	-	26,27,28,29,30,31,32,33,34,35		26	62
CTTGAGGCCTTTCTTACCCAGAAGC----------AGAACTGAAGGATGACGAATTTGAGAA	CTTGAGGCCTTTCTTACCCAGAAGCAGAAGGTGGGAGAACTGAAGGATGACGACTTTGAGAA	var934	25-A-G-A-A-G-G-T-G-G-G18AC8	1	0	10	54	-	26,27,28,29,30,31,32,33,34,35		26	62
CTTGAGGCCTTTCTTACCCAGAAGC----------AGAACTGAAGGATGACGAC-TTGAGAA	CTTGAGGCCTTTCTTACCCAGAAGCAGAAGGTGGGAGAACTGAAGGATGACGACTTTGAGAA	var898	25-A-G-A-A-G-G-T-G-G-G19-T7	0	0	11	-	-	26,27,28,29,30,31,32,33,34,35,55		26	62
CTTGAGGCCTTTCTTACCCAGAAGC----------AGAACTGAAGGATGACGACTTTGA	CTTGAGGCCTTTCTTACCCAGAAGCAGAAGGTGGGAGAACTGAAGGATGACGACTTTGA	var599	25-A-G-A-A-G-G-T-G-G-G24	0	0	10	-	-	26,27,28,29,30,31,32,33,34,35		26	59
CTTGAGGCCTTTCTTACCCAGAAGC----------AGAACTGAAGGATGACGACTTTGAAAA	CTTGAGGCCTTTCTTACCCAGAAGCAGAAGGTGGGAGAACTGAAGGATGACGACTTTGAGAA	var1563	25-A-G-A-A-G-G-T-G-G-G24AG2	1	0	10	60	-	26,27,28,29,30,31,32,33,34,35		26	62
CTTGAGGCCTTTCTTACCCAGAAGC----------AGAACTGAAGGATGACGACTTTGAG	CTTGAGGCCTTTCTTACCCAGAAGCAGAAGGTGGGAGAACTGAAGGATGACGACTTTGAG	var1301	25-A-G-A-A-G-G-T-G-G-G25	0	0	10	-	-	26,27,28,29,30,31,32,33,34,35		26	60
CTTGAGGCCTTTCTTACCCAGAAGC----------AGAACTGAAGGATGACGACTTTGAGA	CTTGAGGCCTTTCTTACCCAGAAGCAGAAGGTGGGAGAACTGAAGGATGACGACTTTGAGA	var583	25-A-G-A-A-G-G-T-G-G-G26	0	0	10	-	-	26,27,28,29,30,31,32,33,34,35		26	61
CTTGAGGCCTTTCTTACCCAGAAGC----------AGAACTGAAGGATGACGACTTTGAGAA	CTTGAGGCCTTTCTTACCCAGAAGCAGAAGGTGGGAGAACTGAAGGATGACGACTTTGAGAA	var1260	25-A-G-A-A-G-G-T-G-G-G27	0	0	10	-	-	26,27,28,29,30,31,32,33,34,35		26	62
CTTGAGGCCTTTCTTACCCAGAAGC----------AGAACTGAAGGATGACGACTTTGAGAA	CTTGAGGCCTTTCTTACCCAGAAGCAGAAGGTGGGAGAACTGAAGGATGACGACTTTGAGAA	var1306	25-A-G-A-A-G-G-T-G-G-G27	0	0	10	-	-	26,27,28,29,30,31,32,33,34,35		26	62
CTTGAGGCCTTTCTTACCCAGAAGC----------AGAACTGAAGGATGACGACTTTGAGAA	CTTGAGGCCTTTCTTACCCAGAAGCAGAAGGTGGGAGAACTGAAGGATGACGACTTTGAGAA	var1380	25-A-G-A-A-G-G-T-G-G-G27	0	0	10	-	-	26,27,28,29,30,31,32,33,34,35		26	62
CTTGAGGCCTTTCTTACCCAGAAGC----------AGAACTGAAGGATGACGACTTTGAGAA	CTTGAGGCCTTTCTTACCCAGAAGCAGAAGGTGGGAGAACTGAAGGATGACGACTTTGAGAA	var1448	25-A-G-A-A-G-G-T-G-G-G27	0	0	10	-	-	26,27,28,29,30,31,32,33,34,35		26	62
CTTGAGGCCTTTCTTACCCAGAAGC----------AGAACTGAAGGATGACGACTTTGAGAA	CTTGAGGCCTTTCTTACCCAGAAGCAGAAGGTGGGAGAACTGAAGGATGACGACTTTGAGAA	var471	25-A-G-A-A-G-G-T-G-G-G27	0	0	10	-	-	26,27,28,29,30,31,32,33,34,35		26	62
CTTGAGGCCTTTCTTACCCAGAAGC----------AGAACTGAAGGATGACGACTTTGAGAA	CTTGAGGCCTTTCTTACCCAGAAGCAGAAGGTGGGAGAACTGAAGGATGACGACTTTGAGAA	var481	25-A-G-A-A-G-G-T-G-G-G27	0	0	10	-	-	26,27,28,29,30,31,32,33,34,35		26	62
CTTGAGGCCTTTCTTACCCAGAAGC----------AGAACTGAAGGATGACGACTTTGAGAA	CTTGAGGCCTTTCTTACCCAGAAGCAGAAGGTGGGAGAACTGAAGGATGACGACTTTGAGAA	var5	25-A-G-A-A-G-G-T-G-G-G27	0	0	10	-	-	26,27,28,29,30,31,32,33,34,35		26	62
CTTGAGGCCTTTCTTACCCAGAAGC----------AGAACTGAAGGATGACGACTTTGAGAA	CTTGAGGCCTTTCTTACCCAGAAGCAGAAGGTGGGAGAACTGAAGGATGACGACTTTGAGAA	var539	25-A-G-A-A-G-G-T-G-G-G27	0	0	10	-	-	26,27,28,29,30,31,32,33,34,35		26	62
CTTGAGGCCTTTCTTACCCAGAAGC----------AGAACTGAAGGATGACGACTTTGAGAA	CTTGAGGCCTTTCTTACCCAGAAGCAGAAGGTGGGAGAACTGAAGGATGACGACTTTGAGAA	var589	25-A-G-A-A-G-G-T-G-G-G27	0	0	10	-	-	26,27,28,29,30,31,32,33,34,35		26	62
CTTGAGGCCTTTCTTACCCAGAAGC----------AGAACTGAAGGATGACGACTTTGAGAA	CTTGAGGCCTTTCTTACCCAGAAGCAGAAGGTGGGAGAACTGAAGGATGACGACTTTGAGAA	var821	25-A-G-A-A-G-G-T-G-G-G27	0	0	10	-	-	26,27,28,29,30,31,32,33,34,35		26	62
CTTGAGGCCTTTCTTACCCAGAAGC----------AGAACTGAAGGATGACGACTTTGATAA	CTTGAGGCCTTTCTTACCCAGAAGCAGAAGGTGGGAGAACTGAAGGATGACGACTTTGAGAA	var1144	25-A-G-A-A-G-G-T-G-G-G24TG2	1	0	10	60	-	26,27,28,29,30,31,32,33,34,35		26	62
CTTGAGGCCTTTCTTACCCAGAAGC----------AGAACTGAAGGATGGAGACTTTGAGAA	CTTGAGGCCTTTCTTACCCAGAAGCAGAAGGTGGGAGAACTGAAGGATGACGACTTTGAGAA	var1199	25-A-G-A-A-G-G-T-G-G-G14GAAC11	2	0	10	50,51	-	26,27,28,29,30,31,32,33,34,35		26	62
CTTGAGGCCTTTCTTACCCAGAAGC----------AGAACTGAAGGATGGCGACTTTGAGAA	CTTGAGGCCTTTCTTACCCAGAAGCAGAAGGTGGGAGAACTGAAGGATGACGACTTTGAGAA	var846	25-A-G-A-A-G-G-T-G-G-G14GA12	1	0	10	50	-	26,27,28,29,30,31,32,33,34,35		26	62
CTTGAGGCCTTTCTTACCCAGAAGC----------AGAACTGAAGGGTGACGACTTTGAGAA	CTTGAGGCCTTTCTTACCCAGAAGCAGAAGGTGGGAGAACTGAAGGATGACGACTTTGAGAA	var1057	25-A-G-A-A-G-G-T-G-G-G11GA15	1	0	10	47	-	26,27,28,29,30,31,32,33,34,35		26	62
CTTGAGGCCTTTCTTACCCAGAAGC----------AGAACTGAGGGATGACGACTTTGAGAA	CTTGAGGCCTTTCTTACCCAGAAGCAGAAGGTGGGAGAACTGAAGGATGACGACTTTGAGAA	var590	25-A-G-A-A-G-G-T-G-G-G8GA18	1	0	10	44	-	26,27,28,29,30,31,32,33,34,35		26	62
CTTGAGGCCTTTCTTACCCAGAAGC----------AGAACTGCAGGATGACGACTTTGAGAA	CTTGAGGCCTTTCTTACCCAGAAGCAGAAGGTGGGAGAACTGAAGGATGACGACTTTGAGAA	var900	25-A-G-A-A-G-G-T-G-G-G7CA19	1	0	10	43	-	26,27,28,29,30,31,32,33,34,35		26	62
CTTGAGGCCTTTCTTACCCAGAAGC----------AGAACTGGAGGATGACGACTTTGAGAA	CTTGAGGCCTTTCTTACCCAGAAGCAGAAGGTGGGAGAACTGAAGGATGACGACTTTGAGAA	var883	25-A-G-A-A-G-G-T-G-G-G7GA19	1	0	10	43	-	26,27,28,29,30,31,32,33,34,35		26	62
CTTGAGGCCTTTCTTACCCAGAAGC----------AGAACTTAAGGATGACGACTTTGAGAA	CTTGAGGCCTTTCTTACCCAGAAGCAGAAGGTGGGAGAACTGAAGGATGACGACTTTGAGAA	var1145	25-A-G-A-A-G-G-T-G-G-G6TG20	1	0	10	42	-	26,27,28,29,30,31,32,33,34,35		26	62
CTTGAGGCCTTTCTTACCCAGAAGC----------AGACCTGAAGGATGACGACTTTGAGAA	CTTGAGGCCTTTCTTACCCAGAAGCAGAAGGTGGGAGAACTGAAGGATGACGACTTTGAGAA	var1339	25-A-G-A-A-G-G-T-G-G-G3CA23	1	0	10	39	-	26,27,28,29,30,31,32,33,34,35		26	62
CTTGAGGCCTTTCTTACCCAGAAGC----------AGAGCTGAAGGATGACGACTTTGAGAA	CTTGAGGCCTTTCTTACCCAGAAGCAGAAGGTGGGAGAACTGAAGGATGACGACTTTGAGAA	var306	25-A-G-A-A-G-G-T-G-G-G3GA23	1	0	10	39	-	26,27,28,29,30,31,32,33,34,35		26	62
CTTGAGGCCTTTCTTACCCAGAAGC----------AGATCTGAAGGATGACGACTTTGAGAA	CTTGAGGCCTTTCTTACCCAGAAGCAGAAGGTGGGAGAACTGAAGGATGACGACTTTGAGAA	var988	25-A-G-A-A-G-G-T-G-G-G3TA23	1	0	10	39	-	26,27,28,29,30,31,32,33,34,35		26	62
CTTGAGGCCTTTCTTACCCAGAAGC----------AGGACTGAAGGATGACGACTTTGAGAA	CTTGAGGCCTTTCTTACCCAGAAGCAGAAGGTGGGAGAACTGAAGGATGACGACTTTGAGAA	var711	25-A-G-A-A-G-G-T-G-G-G2GA24	1	0	10	38	-	26,27,28,29,30,31,32,33,34,35		26	62
CTTGAGGCCTTTCTTACCCAGAAGC----------AGTACTGAAGGATGACGACTTTGAGAA	CTTGAGGCCTTTCTTACCCAGAAGCAGAAGGTGGGAGAACTGAAGGATGACGACTTTGAGAA	var584	25-A-G-A-A-G-G-T-G-G-G2TA24	1	0	10	38	-	26,27,28,29,30,31,32,33,34,35		26	62
CTTGAGGCCTTTCTTACCCAGAAGC----------AGTTCTGAAGGATGACGACTTTGAGAA	CTTGAGGCCTTTCTTACCCAGAAGCAGAAGGTGGGAGAACTGAAGGATGACGACTTTGAGAA	var788	25-A-G-A-A-G-G-T-G-G-G2TATA23	2	0	10	38,39	-	26,27,28,29,30,31,32,33,34,35		26	62
CTTGAGGCCTTTCTTACCCAGAAGC----------GGAACTGAAGGATGACGACTTTGAGAA	CTTGAGGCCTTTCTTACCCAGAAGCAGAAGGTGGGAGAACTGAAGGATGACGACTTTGAGAA	var836	25-A-G-A-A-G-G-T-G-G-GGA26	1	0	10	36	-	26,27,28,29,30,31,32,33,34,35		26	62
CTTGAGGCCTTTCTTACCCAGAAGC----------TTACCTGAAGGATGACGACTTTGAGAA	CTTGAGGCCTTTCTTACCCAGAAGCAGAAGGTGGGAGAACTGAAGGATGACGACTTTGAGAA	var1609	25-A-G-A-A-G-G-T-G-G-GTATG1CA23	3	0	10	36,37,39	-	26,27,28,29,30,31,32,33,34,35		26	62
CTTGAGGCCTTTCTTACCCAGAAGC---------GAGAACTGAAGGATGACGACTTTGAGAA	CTTGAGGCCTTTCTTACCCAGAAGCAGAAGGTGGGAGAACTGAAGGATGACGACTTTGAGAA	var1160	25-A-G-A-A-G-G-T-G-G28	0	0	9	-	-	26,27,28,29,30,31,32,33,34		26	62
CTTGAGGCCTTTCTTACCCAGAAGC--------GGAGAACTGAAGGATGACGACTTTGAGAA	CTTGAGGCCTTTCTTACCCAGAAGCAGAAGGTGGGAGAACTGAAGGATGACGACTTTGAGAA	var540	25-A-G-A-A-G-G-T-G29	0	0	8	-	-	26,27,28,29,30,31,32,33		26	62
CTTGAGGCCTTTCTTACCCAGAAGC-------GGGAGAACTGAAGGATGACGACTTTGAGAA	CTTGAGGCCTTTCTTACCCAGAAGCAGAAGGTGGGAGAACTGAAGGATGACGACTTTGAGAA	var925	25-A-G-A-A-G-G-T30	0	0	7	-	-	26,27,28,29,30,31,32		26	62
CTTGAGGCCTTTCTTACCCAGAAGC-------TTCTGAACTG--GGATGACGACTTTGAGAA	CTTGAGGCCTTTCTTACCCAGAAGCAGAAGGTGGGAGAACTGAAGGATGACGACTTTGAGAA	var1351	25-A-G-A-A-G-G-TTGTGCGTA6-A-A18	4	0	9	33,34,35,36	-	26,27,28,29,30,31,32,43,44		26	62
CTTGAGGCCTTTCTTACCCAGAAGC------TGGGAGAACTGAAGGATGACGACTTTGAGAA	CTTGAGGCCTTTCTTACCCAGAAGCAGAAGGTGGGAGAACTGAAGGATGACGACTTTGAGAA	var158	25-A-G-A-A-G-G31	0	0	6	-	-	26,27,28,29,30,31		26	62
CTTGAGGCCTTTCTTACCCAGAAGC-----TTG-----ACTGAAGGATGACGACTTTGAGAA	CTTGAGGCCTTTCTTACCCAGAAGCAGAAGGTGGGAGAACTGAAGGATGACGACTTTGAGAA	var1650	25-A-G-A-A-GTG2-G-G-A-G-A24	1	0	10	31	-	26,27,28,29,30,34,35,36,37,38		26	62
CTTGAGGCCTTTCTTACCCAGAAGC----GGTGGGAGAACTGAAGGATGACGACTTTGAGAA	CTTGAGGCCTTTCTTACCCAGAAGCAGAAGGTGGGAGAACTGAAGGATGACGACTTTGAGAA	var472	25-A-G-A-A33	0	0	4	-	-	26,27,28,29		26	62
CTTGAGGCCTTTCTTACCCAGAAGC---AGGATGGAGAACTGAAGGATGATGACGACTTTGAGAA	CTTGAGGCCTTTCTTACCCAGAAGCAGAAGGTGGGAGAACTGAAG---GATGACGACTTTGAGAA	var812	25-A-G-A3ATTG12G-A-T-17	2	3	0	32,33	46,47,48	-	46		65
CTTGAGGCCTTTCTTACCCAGAAGC---AGGT-----AACTGAAGGATGACGACTTTGAGAA	CTTGAGGCCTTTCTTACCCAGAAGCAGAAGGTGGGAGAACTGAAGGATGACGACTTTGAGAA	var1626	25-A-G-A4-G-G-G-A-G25	0	0	8	-	-	26,27,28,33,34,35,36,37		26	62
CTTGAGGCCTTTCTTACCCAGAAGC---AGGT-GGAGAACTGAAGGTTGACGACTTTGAGAA	CTTGAGGCCTTTCTTACCCAGAAGCAGAAGGTGGGAGAACTGAAGGATGACGACTTTGAGAA	var1539	25-A-G-A4-G13TA15	1	0	4	47	-	26,27,28,33		26	62
CTTGAGGCCTTTCTTACCCAGAAGC---AGGTGGGAGAACT	CTTGAGGCCTTTCTTACCCAGAAGCAGAAGGTGGGAGAACT	var1456	25-A-G-A13	0	0	3	-	-	26,27,28		26	41
CTTGAGGCCTTTCTTACCCAGAAGC---AGGTGGGAGAACTGAAGGATGACGA-TTTGAGAA	CTTGAGGCCTTTCTTACCCAGAAGCAGAAGGTGGGAGAACTGAAGGATGACGACTTTGAGAA	var1631	25-A-G-A25-C8	0	0	4	-	-	26,27,28,54		26	62
CTTGAGGCCTTTCTTACCCAGAAGC---TTCTGGG-TAACTGAAGGATGACGACTTTGAGAA	CTTGAGGCCTTTCTTACCCAGAAGCAGAAGGTGGGAGAACTGAAGGATGACGACTTTGAGAA	var1238	25-A-G-ATATGCG4-ATG25	4	0	4	29,30,31,37	-	26,27,28,36		26	62
CTTGAGGCCTTTCTTACCCAGAAGC--AAGGCCTGGGTAAGAAACTGAAGGATGACGACTTTGA	CTTGAGGCCTTTCTTACCCAGAAGCAGAAGG--TGGG--AG-AACTGAAGGATGACGACTTTGA	var969	25-A-G4C-C-4T-A-2A-22	0	5	0	-	32,33,38,39,42	-	32		64
CTTGAGGCCTTTCTTACCCAGAAGCA	CTTGAGGCCTTTCTTACCCAGAAGCA	var1074	26	0	0	36	-	-	27,28,29,30,31,32,33,34,35,36,37,38,39,40,41,42,43,44,45,46,47,48,49,50,51,52,53,54,55,56,57,58,59,60,61,62	-	27	26
CTTGAGGCCTTTCTTACCCAGAAGCA	CTTGAGGCCTTTCTTACCCAGAAGCA	var1139	26	0	0	36	-	-	27,28,29,30,31,32,33,34,35,36,37,38,39,40,41,42,43,44,45,46,47,48,49,50,51,52,53,54,55,56,57,58,59,60,61,62	-	27	26
CTTGAGGCCTTTCTTACCCAGAAGCA	CTTGAGGCCTTTCTTACCCAGAAGCA	var1289	26	0	0	36	-	-	27,28,29,30,31,32,33,34,35,36,37,38,39,40,41,42,43,44,45,46,47,48,49,50,51,52,53,54,55,56,57,58,59,60,61,62	-	27	26
CTTGAGGCCTTTCTTACCCAGAAGCA	CTTGAGGCCTTTCTTACCCAGAAGCA	var1465	26	0	0	36	-	-	27,28,29,30,31,32,33,34,35,36,37,38,39,40,41,42,43,44,45,46,47,48,49,50,51,52,53,54,55,56,57,58,59,60,61,62	-	27	26
CTTGAGGCCTTTCTTACCCAGAAGCA	CTTGAGGCCTTTCTTACCCAGAAGCA	var1505	26	0	0	36	-	-	27,28,29,30,31,32,33,34,35,36,37,38,39,40,41,42,43,44,45,46,47,48,49,50,51,52,53,54,55,56,57,58,59,60,61,62	-	27	26
CTTGAGGCCTTTCTTACCCAGAAGCA	CTTGAGGCCTTTCTTACCCAGAAGCA	var1545	26	0	0	36	-	-	27,28,29,30,31,32,33,34,35,36,37,38,39,40,41,42,43,44,45,46,47,48,49,50,51,52,53,54,55,56,57,58,59,60,61,62	-	27	26
CTTGAGGCCTTTCTTACCCAGAAGCA	CTTGAGGCCTTTCTTACCCAGAAGCA	var377	26	0	0	36	-	-	27,28,29,30,31,32,33,34,35,36,37,38,39,40,41,42,43,44,45,46,47,48,49,50,51,52,53,54,55,56,57,58,59,60,61,62	-	27	26
CTTGAGGCCTTTCTTACCCAGAAGCA	CTTGAGGCCTTTCTTACCCAGAAGCA	var41	26	0	0	36	-	-	27,28,29,30,31,32,33,34,35,36,37,38,39,40,41,42,43,44,45,46,47,48,49,50,51,52,53,54,55,56,57,58,59,60,61,62	-	27	26
CTTGAGGCCTTTCTTACCCAGAAGCA	CTTGAGGCCTTTCTTACCCAGAAGCA	var604	26	0	0	36	-	-	27,28,29,30,31,32,33,34,35,36,37,38,39,40,41,42,43,44,45,46,47,48,49,50,51,52,53,54,55,56,57,58,59,60,61,62	-	27	26
CTTGAGGCCTTTCTTACCCAGAAGCA	CTTGAGGCCTTTCTTACCCAGAAGCA	var662	26	0	0	36	-	-	27,28,29,30,31,32,33,34,35,36,37,38,39,40,41,42,43,44,45,46,47,48,49,50,51,52,53,54,55,56,57,58,59,60,61,62	-	27	26
CTTGAGGCCTTTCTTACCCAGAAGCA	CTTGAGGCCTTTCTTACCCAGAAGCA	var698	26	0	0	36	-	-	27,28,29,30,31,32,33,34,35,36,37,38,39,40,41,42,43,44,45,46,47,48,49,50,51,52,53,54,55,56,57,58,59,60,61,62	-	27	26
CTTGAGGCCTTTCTTACCCAGAAGCA	CTTGAGGCCTTTCTTACCCAGAAGCA	var873	26	0	0	36	-	-	27,28,29,30,31,32,33,34,35,36,37,38,39,40,41,42,43,44,45,46,47,48,49,50,51,52,53,54,55,56,57,58,59,60,61,62	-	27	26
CTTGAGGCCTTTCTTACCCAGAAGCA	CTTGAGGCCTTTCTTACCCAGAAGCA	var912	26	0	0	36	-	-	27,28,29,30,31,32,33,34,35,36,37,38,39,40,41,42,43,44,45,46,47,48,49,50,51,52,53,54,55,56,57,58,59,60,61,62	-	27	26
CTTGAGGCCTTTCTTACCCAGAAGCA	CTTGAGGCCTTTCTTACCCAGAAGCA	var918	26	0	0	36	-	-	27,28,29,30,31,32,33,34,35,36,37,38,39,40,41,42,43,44,45,46,47,48,49,50,51,52,53,54,55,56,57,58,59,60,61,62	-	27	26
CTTGAGGCCTTTCTTACCCAGAAGCA--------------CGAAGGATGACGACTTTGAGAA	CTTGAGGCCTTTCTTACCCAGAAGCAGAAGGTGGGAGAACTGAAGGATGACGACTTTGAGAA	var1092	26-G-A-A-G-G-T-G-G-G-A-G-A-A-CCT21	1	0	14	41	-	27,28,29,30,31,32,33,34,35,36,37,38,39,40		27	62
CTTGAGGCCTTTCTTACCCAGAAGCA--------------TGAAGGATGACGACTTTGAGAA	CTTGAGGCCTTTCTTACCCAGAAGCAGAAGGTGGGAGAACTGAAGGATGACGACTTTGAGAA	var889	26-G-A-A-G-G-T-G-G-G-A-G-A-A-C22	0	0	14	-	-	27,28,29,30,31,32,33,34,35,36,37,38,39,40		27	62
CTTGAGGCCTTTCTTACCCAGAAGCA-----------AACTGAAGGATGACGACTTTGAGAA	CTTGAGGCCTTTCTTACCCAGAAGCAGAAGGTGGGAGAACTGAAGGATGACGACTTTGAGAA	var255	26-G-A-A-G-G-T-G-G-G-A-G25	0	0	11	-	-	27,28,29,30,31,32,33,34,35,36,37		27	62
CTTGAGGCCTTTCTTACCCAGAAGCA---------AGAACTGAAGGATGACGACTTTGAGAA	CTTGAGGCCTTTCTTACCCAGAAGCAGAAGGTGGGAGAACTGAAGGATGACGACTTTGAGAA	var678	26-G-A-A-G-G-T-G-G-G27	0	0	9	-	-	27,28,29,30,31,32,33,34,35		27	62
CTTGAGGCCTTTCTTACCCAGAAGCA---------AGTAAGAAAGGATGACGACTTTGAGAA	CTTGAGGCCTTTCTTACCCAGAAGCAGAAGGTGGGAGAACTGAAGGATGACGACTTTGAGAA	var717	26-G-A-A-G-G-T-G-G-G2TA1ACGTAG20	4	0	9	38,40,41,42	-	27,28,29,30,31,32,33,34,35		27	62
CTTGAGGCCTTTCTTACCCAGAAGCA---------TGAACTGAAGGATGACGACTTTGAGAA	CTTGAGGCCTTTCTTACCCAGAAGCAGAAGGTGGGAGAACTGAAGGATGACGACTTTGAGAA	var1340	26-G-A-A-G-G-T-G-G-GTA26	1	0	9	36	-	27,28,29,30,31,32,33,34,35		27	62
CTTGAGGCCTTTCTTACCCAGAAGCA--------CTGAACTGAAGGATGACGACTTTGAGAA	CTTGAGGCCTTTCTTACCCAGAAGCAGAAGGTGGGAGAACTGAAGGATGACGACTTTGAGAA	var1546	26-G-A-A-G-G-T-G-GCGTA26	2	0	8	35,36	-	27,28,29,30,31,32,33,34		27	62
CTTGAGGCCTTTCTTACCCAGAAGCA--------GAGAACTAAAGGATGACGACTTTGAGAA	CTTGAGGCCTTTCTTACCCAGAAGCAGAAGGTGGGAGAACTGAAGGATGACGACTTTGAGAA	var1471	26-G-A-A-G-G-T-G-G7AG20	1	0	8	42	-	27,28,29,30,31,32,33,34		27	62
CTTGAGGCCTTTCTTACCCAGAAGCA--------GAGAACTGAA-GATGACGACTTTGAGAA	CTTGAGGCCTTTCTTACCCAGAAGCAGAAGGTGGGAGAACTGAAGGATGACGACTTTGAGAA	var1062	26-G-A-A-G-G-T-G-G10-G17	0	0	9	-	-	27,28,29,30,31,32,33,34,45		27	62
CTTGAGGCCTTTCTTACCCAGAAGCA--------GAGAACTGAAGAATGACGACTTTGAGAA	CTTGAGGCCTTTCTTACCCAGAAGCAGAAGGTGGGAGAACTGAAGGATGACGACTTTGAGAA	var1446	26-G-A-A-G-G-T-G-G11AG16	1	0	8	46	-	27,28,29,30,31,32,33,34		27	62
CTTGAGGCCTTTCTTACCCAGAAGCA--------GAGAACTGAAGGACGACGACTTTGAGAA	CTTGAGGCCTTTCTTACCCAGAAGCAGAAGGTGGGAGAACTGAAGGATGACGACTTTGAGAA	var1033	26-G-A-A-G-G-T-G-G13CT14	1	0	8	48	-	27,28,29,30,31,32,33,34		27	62
CTTGAGGCCTTTCTTACCCAGAAGCA--------GAGAACTGAAGGATGACGAATTTGAGAA	CTTGAGGCCTTTCTTACCCAGAAGCAGAAGGTGGGAGAACTGAAGGATGACGACTTTGAGAA	var1252	26-G-A-A-G-G-T-G-G19AC8	1	0	8	54	-	27,28,29,30,31,32,33,34		27	62
CTTGAGGCCTTTCTTACCCAGAAGCA--------GAGAACTGAAGGATGACGACTTTGA	CTTGAGGCCTTTCTTACCCAGAAGCAGAAGGTGGGAGAACTGAAGGATGACGACTTTGA	var882	26-G-A-A-G-G-T-G-G25	0	0	8	-	-	27,28,29,30,31,32,33,34		27	59
CTTGAGGCCTTTCTTACCCAGAAGCA--------GAGAACTGAAGGATGACGACTTTGAGA	CTTGAGGCCTTTCTTACCCAGAAGCAGAAGGTGGGAGAACTGAAGGATGACGACTTTGAGA	var1053	26-G-A-A-G-G-T-G-G27	0	0	8	-	-	27,28,29,30,31,32,33,34		27	61
CTTGAGGCCTTTCTTACCCAGAAGCA--------GAGAACTGAAGGATGACGACTTTGAGAA	CTTGAGGCCTTTCTTACCCAGAAGCAGAAGGTGGGAGAACTGAAGGATGACGACTTTGAGAA	var1080	26-G-A-A-G-G-T-G-G28	0	0	8	-	-	27,28,29,30,31,32,33,34		27	62
CTTGAGGCCTTTCTTACCCAGAAGCA--------GAGAACTGAAGGATGACGACTTTGAGAA	CTTGAGGCCTTTCTTACCCAGAAGCAGAAGGTGGGAGAACTGAAGGATGACGACTTTGAGAA	var1269	26-G-A-A-G-G-T-G-G28	0	0	8	-	-	27,28,29,30,31,32,33,34		27	62
CTTGAGGCCTTTCTTACCCAGAAGCA--------GAGAACTGAAGGATGACGACTTTGAGAA	CTTGAGGCCTTTCTTACCCAGAAGCAGAAGGTGGGAGAACTGAAGGATGACGACTTTGAGAA	var685	26-G-A-A-G-G-T-G-G28	0	0	8	-	-	27,28,29,30,31,32,33,34		27	62
CTTGAGGCCTTTCTTACCCAGAAGCA--------GAGAACTGAAGGATGACGACTTTGAGAA	CTTGAGGCCTTTCTTACCCAGAAGCAGAAGGTGGGAGAACTGAAGGATGACGACTTTGAGAA	var7	26-G-A-A-G-G-T-G-G28	0	0	8	-	-	27,28,29,30,31,32,33,34		27	62
CTTGAGGCCTTTCTTACCCAGAAGCA--------GAGAACTGAAGGATGACGACTTTGAGAA	CTTGAGGCCTTTCTTACCCAGAAGCAGAAGGTGGGAGAACTGAAGGATGACGACTTTGAGAA	var725	26-G-A-A-G-G-T-G-G28	0	0	8	-	-	27,28,29,30,31,32,33,34		27	62
CTTGAGGCCTTTCTTACCCAGAAGCA--------GAGAACTGAAGGATGACGACTTTGAGAA	CTTGAGGCCTTTCTTACCCAGAAGCAGAAGGTGGGAGAACTGAAGGATGACGACTTTGAGAA	var881	26-G-A-A-G-G-T-G-G28	0	0	8	-	-	27,28,29,30,31,32,33,34		27	62
CTTGAGGCCTTTCTTACCCAGAAGCA--------GAGAACTGAAGGATGGAGACTTTGAGAA	CTTGAGGCCTTTCTTACCCAGAAGCAGAAGGTGGGAGAACTGAAGGATGACGACTTTGAGAA	var774	26-G-A-A-G-G-T-G-G15GAAC11	2	0	8	50,51	-	27,28,29,30,31,32,33,34		27	62
CTTGAGGCCTTTCTTACCCAGAAGCA--------GAGAACTGAAGGATGGCGACTTTGAGAA	CTTGAGGCCTTTCTTACCCAGAAGCAGAAGGTGGGAGAACTGAAGGATGACGACTTTGAGAA	var1054	26-G-A-A-G-G-T-G-G15GA12	1	0	8	50	-	27,28,29,30,31,32,33,34		27	62
CTTGAGGCCTTTCTTACCCAGAAGCA--------GAGAACTGAAGGCTGACGACTTTGAGAA	CTTGAGGCCTTTCTTACCCAGAAGCAGAAGGTGGGAGAACTGAAGGATGACGACTTTGAGAA	var1635	26-G-A-A-G-G-T-G-G12CA15	1	0	8	47	-	27,28,29,30,31,32,33,34		27	62
CTTGAGGCCTTTCTTACCCAGAAGCA--------GAGAACTGAAGGGTGACGACTTTGAGAA	CTTGAGGCCTTTCTTACCCAGAAGCAGAAGGTGGGAGAACTGAAGGATGACGACTTTGAGAA	var1638	26-G-A-A-G-G-T-G-G12GA15	1	0	8	47	-	27,28,29,30,31,32,33,34		27	62
CTTGAGGCCTTTCTTACCCAGAAGCA--------GAGAACTGAGGGATGACGACTTTGAGAA	CTTGAGGCCTTTCTTACCCAGAAGCAGAAGGTGGGAGAACTGAAGGATGACGACTTTGAGAA	var1405	26-G-A-A-G-G-T-G-G9GA18	1	0	8	44	-	27,28,29,30,31,32,33,34		27	62
CTTGAGGCCTTTCTTACCCAGAAGCA--------GAGAACTTAAGGATGACGACTTTGAGAA	CTTGAGGCCTTTCTTACCCAGAAGCAGAAGGTGGGAGAACTGAAGGATGACGACTTTGAGAA	var951	26-G-A-A-G-G-T-G-G7TG20	1	0	8	42	-	27,28,29,30,31,32,33,34		27	62
CTTGAGGCCTTTCTTACCCAGAAGCA--------GAGAGCTGAAGGATGACGACTTTGAGAA	CTTGAGGCCTTTCTTACCCAGAAGCAGAAGGTGGGAGAACTGAAGGATGACGACTTTGAGAA	var810	26-G-A-A-G-G-T-G-G4GA23	1	0	8	39	-	27,28,29,30,31,32,33,34		27	62
CTTGAGGCCTTTCTTACCCAGAAGCA--------GAGCACTGAAGGATGACGACTTTGAGAA	CTTGAGGCCTTTCTTACCCAGAAGCAGAAGGTGGGAGAACTGAAGGATGACGACTTTGAGAA	var1181	26-G-A-A-G-G-T-G-G3CA24	1	0	8	38	-	27,28,29,30,31,32,33,34		27	62
CTTGAGGCCTTTCTTACCCAGAAGCA--------GAGGACTGAAGGATGACGACTTTGAGAA	CTTGAGGCCTTTCTTACCCAGAAGCAGAAGGTGGGAGAACTGAAGGATGACGACTTTGAGAA	var1410	26-G-A-A-G-G-T-G-G3GA24	1	0	8	38	-	27,28,29,30,31,32,33,34		27	62
CTTGAGGCCTTTCTTACCCAGAAGCA--------GATAACTGAAGGATGACGACTTTGAGAA	CTTGAGGCCTTTCTTACCCAGAAGCAGAAGGTGGGAGAACTGAAGGATGACGACTTTGAGAA	var938	26-G-A-A-G-G-T-G-G2TG25	1	0	8	37	-	27,28,29,30,31,32,33,34		27	62
CTTGAGGCCTTTCTTACCCAGAAGCA--------GGGAACTGAAGGATGACGACTTTGAGAA	CTTGAGGCCTTTCTTACCCAGAAGCAGAAGGTGGGAGAACTGAAGGATGACGACTTTGAGAA	var1302	26-G-A-A-G-G-T-G-G1GA26	1	0	8	36	-	27,28,29,30,31,32,33,34		27	62
CTTGAGGCCTTTCTTACCCAGAAGCA-------GGAGAACTCAAGCA-GACGACTTTGAGAA	CTTGAGGCCTTTCTTACCCAGAAGCAGAAGGTGGGAGAACTGAAGGATGACGACTTTGAGAA	var1192	26-G-A-A-G-G-T-G8CG3CG1-T14	2	0	8	42,46	-	27,28,29,30,31,32,33,48		27	62
CTTGAGGCCTTTCTTACCCAGAAGCA------GGGAGAACTGAAGGA	CTTGAGGCCTTTCTTACCCAGAAGCAGAAGGTGGGAGAACTGAAGGA	var1499	26-G-A-A-G-G-T15	0	0	6	-	-	27,28,29,30,31,32		27	47
CTTGAGGCCTTTCTTACCCAGAAGCA-----TG-----ACTGAAGGATGACGACTTTGAGAA	CTTGAGGCCTTTCTTACCCAGAAGCAGAAGGTGGGAGAACTGAAGGATGACGACTTTGAGAA	var1432	26-G-A-A-G-G2-G-G-A-G-A24	0	0	10	-	-	27,28,29,30,31,34,35,36,37,38		27	62
CTTGAGGCCTTTCTTACCCAGAAGCA-----TGGG-----TGAAGGATGACGACTTTGAGAA	CTTGAGGCCTTTCTTACCCAGAAGCAGAAGGTGGGAGAACTGAAGGATGACGACTTTGAGAA	var1352	26-G-A-A-G-G4-A-G-A-A-C22	0	0	10	-	-	27,28,29,30,31,36,37,38,39,40		27	62
CTTGAGGCCTTTCTTACCCAGAAGCA-----TGGGAGAACTGAAGGATGACGACTTTGAGAA	CTTGAGGCCTTTCTTACCCAGAAGCAGAAGGTGGGAGAACTGAAGGATGACGACTTTGAGAA	var416	26-G-A-A-G-G31	0	0	5	-	-	27,28,29,30,31		27	62
CTTGAGGCCTTTCTTACCCAGAAGCA----GCTGAAGAACTGAAGGATGACGACTTTGAGAA	CTTGAGGCCTTTCTTACCCAGAAGCAGAAGGTGGGAGAACTGAAGGATGACGACTTTGAGAA	var1320	26-G-A-A-G1CTTG1AG27	3	0	4	32,33,35	-	27,28,29,30		27	62
CTTGAGGCCTTTCTTACCCAGAAGCA----GTAAGAAACTTACTGAAGGATGACGACTTTGAGAA	CTTGAGGCCTTTCTTACCCAGAAGCAGAAGGTGGGAGA---ACTGAAGGATGACGACTTTGAGAA	var1611	26-G-A-A-G2AGAG2AG1C-T-T-24	3	3	0	33,34,37	39,40,41	-	39		65
CTTGAGGCCTTTCTTACCCAGAAGCA----GTGGGAGAACTG	CTTGAGGCCTTTCTTACCCAGAAGCAGAAGGTGGGAGAACTG	var1218	26-G-A-A-G12	0	0	4	-	-	27,28,29,30		27	42
CTTGAGGCCTTTCTTACCCAGAAGCA----GTGGGAGAACTG	CTTGAGGCCTTTCTTACCCAGAAGCAGAAGGTGGGAGAACTG	var345	26-G-A-A-G12	0	0	4	-	-	27,28,29,30		27	42
CTTGAGGCCTTTCTTACCCAGAAGCA--AGGCGGGAGAACTGAAGGATGACGACTTTGAGAA	CTTGAGGCCTTTCTTACCCAGAAGCAGAAGGTGGGAGAACTGAAGGATGACGACTTTGAGAA	var1083	26-G-A3CT30	1	0	2	32	-	27,28		27	62
CTTGAGGCCTTTCTTACCCAGAAGCA--AGGTGGGAGAACTGAAGGATGACGACTTTGAGAA	CTTGAGGCCTTTCTTACCCAGAAGCAGAAGGTGGGAGAACTGAAGGATGACGACTTTGAGAA	var23	26-G-A34	0	0	2	-	-	27,28		27	62
CTTGAGGCCTTTCTTACCCAGAAGCA--ATGTGGGAGAACTGAAGGATGACGACTTTGAGAA	CTTGAGGCCTTTCTTACCCAGAAGCAGAAGGTGGGAGAACTGAAGGATGACGACTTTGAGAA	var716	26-G-A1TG32	1	0	2	30	-	27,28		27	62
CTTGAGGCCTTTCTTACCCAGAAGCA-AAGGTGGGAGAACTGAAGGATGACGACTTTGAGAA	CTTGAGGCCTTTCTTACCCAGAAGCAGAAGGTGGGAGAACTGAAGGATGACGACTTTGAGAA	var251	26-G35	0	0	1	-	-	27		27	62
CTTGAGGCCTTTCTTACCCAGAAGCA-ACTGAAGGAGAACTGAAGGATGACGACTTTGAGAA	CTTGAGGCCTTTCTTACCCAGAAGCAGAAGGTGGGAGAACTGAAGGATGACGACTTTGAGAA	var1047	26-G1CATG1ATAG29	4	0	1	29,30,32,33	-	27		27	62
CTTGAGGCCTTTCTTACCCAGAAGCA-CATGTGGGAGAACTGAAG	CTTGAGGCCTTTCTTACCCAGAAGCAGAAGGTGGGAGAACTGAAG	var991	26-GCA1TG15	2	0	1	28,30	-	27		27	45
CTTGAGGCCTTTCTTACCCAGAAGCAA-----GGGAGAACTGAAGGATGACGACTTTGAGAA	CTTGAGGCCTTTCTTACCCAGAAGCAGAAGGTGGGAGAACTGAAGGATGACGACTTTGAGAA	var953	26AG-A-A-G-G-T30	1	0	5	27	-	28,29,30,31,32		28	62
CTTGAGGCCTTTCTTACCCAGAAGCAA---GTGGGAGAACTGAAGGATGACGACTTTGAGAA	CTTGAGGCCTTTCTTACCCAGAAGCAGAAGGTGGGAGAACTGAAGGATGACGACTTTGAGAA	var291	26AG-A-A-G32	1	0	3	27	-	28,29,30		28	62
CTTGAGGCCTTTCTTACCCAGAAGCAAA--------GAACTGAAGGATGACGACTTTGAGAA	CTTGAGGCCTTTCTTACCCAGAAGCAGAAGGTGGGAGAACTGAAGGATGACGACTTTGAGAA	var986	26AG1-A-G-G-T-G-G-G-A26	1	0	8	27	-	29,30,31,32,33,34,35,36		29	62
CTTGAGGCCTTTCTTACCCAGAAGCAAA--GTGGGAGAACTGAAGGATGACGACTTTGAGAA	CTTGAGGCCTTTCTTACCCAGAAGCAGAAGGTGGGAGAACTGAAGGATGACGACTTTGAGAA	var1035	26AG1-A-G32	1	0	2	27	-	29,30		29	62
CTTGAGGCCTTTCTTACCCAGAAGCAAAAAGGTGGGAGAACTGAAGGATGACGACTTTGAGA	CTTGAGGCCTTTCTTACCCAGAAGCAGAA-GGTGGGAGAACTGAAGGATGACGACTTTGAGA	var820	26AG2A-32	1	1	0	27	30	-	30		62
CTTGAGGCCTTTCTTACCCAGAAGCAAAAGGTGGGAGAACTGAAGGATGACGACTTTGAGAA	CTTGAGGCCTTTCTTACCCAGAAGCAGAAGGTGGGAGAACTGAAGGATGACGACTTTGAGAA	var172	26AG35	1	0	0	27	-	-			62
CTTGAGGCCTTTCTTACCCAGAAGCAAAGGAGAACTGGGTGGGAGAACTGAAGGATGACGAC	CTTGAGGCCTTTCTTACCCAGAAGC-----AGAA---GGTGGGAGAACTGAAGGATGACGAC	var453	25A-A-A-G-G-4C-T-G-25	0	8	0	-	26,27,28,29,30,35,36,37	-	26		62
CTTGAGGCCTTTCTTACCCAGAAGCAACAGGTGGGAGAACTGAAGGATGACGACTTTGAGAA	CTTGAGGCCTTTCTTACCCAGAAGCAGAAGGTGGGAGAACTGAAGGATGACGACTTTGAGAA	var1652	26AGCA34	2	0	0	27,28	-	-			62
CTTGAGGCCTTTCTTACCCAGAAGCAACTTCAGGGAGAACTGAAGGATGACGACTTTGAGAA	CTTGAGGCCTTTCTTACCCAGAAGCAGAAGGTGGGAGAACTGAAGGATGACGACTTTGAGAA	var319	26AGCATATGCGAT30	6	0	0	27,28,29,30,31,32	-	-			62
CTTGAGGCCTTTCTTACCCAGAAGCAAGAAAGGTGGGAGAACTGAAGGATGACGACTTTGAG	CTTGAGGCCTTTCTTACCCAGAAGCAG--AAGGTGGGAGAACTGAAGGATGACGACTTTGAG	var838	26AGG-A-33	1	2	0	27	28,29	-	28		62
CTTGAGGCCTTTCTTACCCAGAAGCAAGAAG-----AGAACTGAAGGATGACGACTTTGAGAA	CTTGAGGCCTTTCTTACCCAGAAGCA-GAAGGTGGGAGAACTGAAGGATGACGACTTTGAGAA	var610	26A-4-G-T-G-G-G27	0	1	0	-	27	-	27		63
CTTGAGGCCTTTCTTACCCAGAAGCAAGAAGGTGGGAGAACTGAAGGATGACGACTTTGAGA	CTTGAGGCCTTTCTTACCCAGAAGCA-GAAGGTGGGAGAACTGAAGGATGACGACTTTGAGA	var1081	26A-35	0	1	0	-	27	-	27		62
CTTGAGGCCTTTCTTACCCAGAAGCAC----TGGGAGAACTGAAGGATGACGACTTTGAGAA	CTTGAGGCCTTTCTTACCCAGAAGCAGAAGGTGGGAGAACTGAAGGATGACGACTTTGAGAA	var373	26CG-A-A-G-G31	1	0	4	27	-	28,29,30,31		28	62
CTTGAGGCCTTTCTTACCCAGAAGCACA-----GAAGAACTGAAGGATGACGACTTTGAGAA	CTTGAGGCCTTTCTTACCCAGAAGCAGAAGGTGGGAGAACTGAAGGATGACGACTTTGAGAA	var1362	26CG1-A-G-G-T-G1AG27	2	0	5	27,35	-	29,30,31,32,33		29	62
CTTGAGGCCTTTCTTACCCAGAAGCACA-GGTGGGAGAACTGAAGGATGACGACTTTGAGAA	CTTGAGGCCTTTCTTACCCAGAAGCAGAAGGTGGGAGAACTGAAGGATGACGACTTTGAGAA	var186	26CG1-A33	1	0	1	27	-	29		29	62
CTTGAGGCCTTTCTTACCCAGAAGCACAAGGTGGGAGAACTGAAGGATGACGACTTTGAGAA	CTTGAGGCCTTTCTTACCCAGAAGCAGAAGGTGGGAGAACTGAAGGATGACGACTTTGAGAA	var1153	26CG35	1	0	0	27	-	-			62
CTTGAGGCCTTTCTTACCCAGAAGCACAGAAGGTGGGAGAACTGAAGGATGACGACTTTGAG	CTTGAGGCCTTTCTTACCCAGAAGCA--GAAGGTGGGAGAACTGAAGGATGACGACTTTGAG	var388	26C-A-34	0	2	0	-	27,28	-	27		62
CTTGAGGCCTTTCTTACCCAGAAGCACC---TGGGAGAACTGAAGGATGACGACTTTGAGAA	CTTGAGGCCTTTCTTACCCAGAAGCAGAAGGTGGGAGAACTGAAGGATGACGACTTTGAGAA	var1170	26CGCA-A-G-G31	2	0	3	27,28	-	29,30,31		29	62
CTTGAGGCCTTTCTTACCCAGAAGCACCAGAAGGTGGGAGAACTGAAGGATGACGACTTTGA	CTTGAGGCCTTTCTTACCCAGAAGCA---GAAGGTGGGAGAACTGAAGGATGACGACTTTGA	var469	26C-C-A-33	0	3	0	-	27,28,29	-	27		62
CTTGAGGCCTTTCTTACCCAGAAGCACCTAGGTGGGAGAACTGAAGGATGACGACTTTGAGA	CTTGAGGCCTTTCTTACCCAGAAGCAGA-AGGTGGGAGAACTGAAGGATGACGACTTTGAGA	var761	26CGCAT-33	2	1	0	27,28	29	-	29		62
CTTGAGGCCTTTCTTACCCAGAAGCACCTGAAGGTGGGAGAACTGAAGGATGACGACTTTGA	CTTGAGGCCTTTCTTACCCAGAAGCA---GAAGGTGGGAGAACTGAAGGATGACGACTTTGA	var516	26C-C-T-33	0	3	0	-	27,28,29	-	27		62
CTTGAGGCCTTTCTTACCCAGAAGCACCTTCTCAGGTGGGAGAACTGAAGGATGACGACTTT	CTTGAGGCCTTTCTTACCCAGAAGCAGA-----AGGTGGGAGAACTGAAGGATGACGACTTT	var1396	26CGCAT-T-C-T-C-29	2	5	0	27,28	29,30,31,32,33	-	29		62
CTTGAGGCCTTTCTTACCCAGAAGCACTGAAGG----AGAACTGAAGGATGACGACTTTGAGAA	CTTGAGGCCTTTCTTACCCAGAAGCA--GAAGGTGGGAGAACTGAAGGATGACGACTTTGAGAA	var950	26C-T-5-T-G-G-G27	0	2	0	-	27,28	-	27		64
CTTGAGGCCTTTCTTACCCAGAAGCAG	CTTGAGGCCTTTCTTACCCAGAAGCAG	var1004	27	0	0	35	-	-	28,29,30,31,32,33,34,35,36,37,38,39,40,41,42,43,44,45,46,47,48,49,50,51,52,53,54,55,56,57,58,59,60,61,62	-	28	27
CTTGAGGCCTTTCTTACCCAGAAGCAG	CTTGAGGCCTTTCTTACCCAGAAGCAG	var1040	27	0	0	35	-	-	28,29,30,31,32,33,34,35,36,37,38,39,40,41,42,43,44,45,46,47,48,49,50,51,52,53,54,55,56,57,58,59,60,61,62	-	28	27
CTTGAGGCCTTTCTTACCCAGAAGCAG	CTTGAGGCCTTTCTTACCCAGAAGCAG	var1061	27	0	0	35	-	-	28,29,30,31,32,33,34,35,36,37,38,39,40,41,42,43,44,45,46,47,48,49,50,51,52,53,54,55,56,57,58,59,60,61,62	-	28	27
CTTGAGGCCTTTCTTACCCAGAAGCAG	CTTGAGGCCTTTCTTACCCAGAAGCAG	var1070	27	0	0	35	-	-	28,29,30,31,32,33,34,35,36,37,38,39,40,41,42,43,44,45,46,47,48,49,50,51,52,53,54,55,56,57,58,59,60,61,62	-	28	27
CTTGAGGCCTTTCTTACCCAGAAGCAG	CTTGAGGCCTTTCTTACCCAGAAGCAG	var1137	27	0	0	35	-	-	28,29,30,31,32,33,34,35,36,37,38,39,40,41,42,43,44,45,46,47,48,49,50,51,52,53,54,55,56,57,58,59,60,61,62	-	28	27
CTTGAGGCCTTTCTTACCCAGAAGCAG	CTTGAGGCCTTTCTTACCCAGAAGCAG	var1282	27	0	0	35	-	-	28,29,30,31,32,33,34,35,36,37,38,39,40,41,42,43,44,45,46,47,48,49,50,51,52,53,54,55,56,57,58,59,60,61,62	-	28	27
CTTGAGGCCTTTCTTACCCAGAAGCAG	CTTGAGGCCTTTCTTACCCAGAAGCAG	var1316	27	0	0	35	-	-	28,29,30,31,32,33,34,35,36,37,38,39,40,41,42,43,44,45,46,47,48,49,50,51,52,53,54,55,56,57,58,59,60,61,62	-	28	27
CTTGAGGCCTTTCTTACCCAGAAGCAG	CTTGAGGCCTTTCTTACCCAGAAGCAG	var1537	27	0	0	35	-	-	28,29,30,31,32,33,34,35,36,37,38,39,40,41,42,43,44,45,46,47,48,49,50,51,52,53,54,55,56,57,58,59,60,61,62	-	28	27
CTTGAGGCCTTTCTTACCCAGAAGCAG	CTTGAGGCCTTTCTTACCCAGAAGCAG	var17	27	0	0	35	-	-	28,29,30,31,32,33,34,35,36,37,38,39,40,41,42,43,44,45,46,47,48,49,50,51,52,53,54,55,56,57,58,59,60,61,62	-	28	27
CTTGAGGCCTTTCTTACCCAGAAGCAG	CTTGAGGCCTTTCTTACCCAGAAGCAG	var357	27	0	0	35	-	-	28,29,30,31,32,33,34,35,36,37,38,39,40,41,42,43,44,45,46,47,48,49,50,51,52,53,54,55,56,57,58,59,60,61,62	-	28	27
CTTGAGGCCTTTCTTACCCAGAAGCAG	CTTGAGGCCTTTCTTACCCAGAAGCAG	var794	27	0	0	35	-	-	28,29,30,31,32,33,34,35,36,37,38,39,40,41,42,43,44,45,46,47,48,49,50,51,52,53,54,55,56,57,58,59,60,61,62	-	28	27
CTTGAGGCCTTTCTTACCCAGAAGCAG	CTTGAGGCCTTTCTTACCCAGAAGCAG	var917	27	0	0	35	-	-	28,29,30,31,32,33,34,35,36,37,38,39,40,41,42,43,44,45,46,47,48,49,50,51,52,53,54,55,56,57,58,59,60,61,62	-	28	27
CTTGAGGCCTTTCTTACCCAGAAGCAG	CTTGAGGCCTTTCTTACCCAGAAGCAG	var918	27	0	0	35	-	-	28,29,30,31,32,33,34,35,36,37,38,39,40,41,42,43,44,45,46,47,48,49,50,51,52,53,54,55,56,57,58,59,60,61,62	-	28	27
CTTGAGGCCTTTCTTACCCAGAAGCAG	CTTGAGGCCTTTCTTACCCAGAAGCAG	var942	27	0	0	35	-	-	28,29,30,31,32,33,34,35,36,37,38,39,40,41,42,43,44,45,46,47,48,49,50,51,52,53,54,55,56,57,58,59,60,61,62	-	28	27
CTTGAGGCCTTTCTTACCCAGAAGCAG	CTTGAGGCCTTTCTTACCCAGAAGCAG	var978	27	0	0	35	-	-	28,29,30,31,32,33,34,35,36,37,38,39,40,41,42,43,44,45,46,47,48,49,50,51,52,53,54,55,56,57,58,59,60,61,62	-	28	27
CTTGAGGCCTTTCTTACCCAGAAGCAG--------------CAAGGATGACGACTTTGAGAA	CTTGAGGCCTTTCTTACCCAGAAGCAGAAGGTGGGAGAACTGAAGGATGACGACTTTGAGAA	var585	27-A-A-G-G-T-G-G-G-A-G-A-A-C-TCG20	1	0	14	42	-	28,29,30,31,32,33,34,35,36,37,38,39,40,41		28	62
CTTGAGGCCTTTCTTACCCAGAAGCAG--------------TAAGGATGACGACTTTGAGAA	CTTGAGGCCTTTCTTACCCAGAAGCAGAAGGTGGGAGAACTGAAGGATGACGACTTTGAGAA	var1175	27-A-A-G-G-T-G-G-G-A-G-A-A-C-TTG20	1	0	14	42	-	28,29,30,31,32,33,34,35,36,37,38,39,40,41		28	62
CTTGAGGCCTTTCTTACCCAGAAGCAG-------------TGAAGGATGACGACTTTGAGAA	CTTGAGGCCTTTCTTACCCAGAAGCAGAAGGTGGGAGAACTGAAGGATGACGACTTTGAGAA	var848	27-A-A-G-G-T-G-G-G-A-G-A-A-C22	0	0	13	-	-	28,29,30,31,32,33,34,35,36,37,38,39,40		28	62
CTTGAGGCCTTTCTTACCCAGAAGCAG------------CTGAAGGATGACGACTTTGAGAA	CTTGAGGCCTTTCTTACCCAGAAGCAGAAGGTGGGAGAACTGAAGGATGACGACTTTGAGAA	var519	27-A-A-G-G-T-G-G-G-A-G-A-A23	0	0	12	-	-	28,29,30,31,32,33,34,35,36,37,38,39		28	62
CTTGAGGCCTTTCTTACCCAGAAGCAG-----------ACTGAAGGATGACGACTTTGAGAA	CTTGAGGCCTTTCTTACCCAGAAGCAGAAGGTGGGAGAACTGAAGGATGACGACTTTGAGAA	var30	27-A-A-G-G-T-G-G-G-A-G-A24	0	0	11	-	-	28,29,30,31,32,33,34,35,36,37,38		28	62
CTTGAGGCCTTTCTTACCCAGAAGCAG---------GAA-TGAAGGATGACGACTTTGAGAA	CTTGAGGCCTTTCTTACCCAGAAGCAGAAGGTGGGAGAACTGAAGGATGACGACTTTGAGAA	var993	27-A-A-G-G-T-G-G-G-A3-C22	0	0	10	-	-	28,29,30,31,32,33,34,35,36,40		28	62
CTTGAGGCCTTTCTTACCCAGAAGCAG---------GAACTGAAGGATGACGACTTTGAGAA	CTTGAGGCCTTTCTTACCCAGAAGCAGAAGGTGGGAGAACTGAAGGATGACGACTTTGAGAA	var600	27-A-A-G-G-T-G-G-G-A26	0	0	9	-	-	28,29,30,31,32,33,34,35,36		28	62
CTTGAGGCCTTTCTTACCCAGAAGCAG---------TAACTGAAGGATGACGACTTTGAGAA	CTTGAGGCCTTTCTTACCCAGAAGCAGAAGGTGGGAGAACTGAAGGATGACGACTTTGAGAA	var559	27-A-A-G-G-T-G-G-G-ATG25	1	0	9	37	-	28,29,30,31,32,33,34,35,36		28	62
CTTGAGGCCTTTCTTACCCAGAAGCAG-------GAGAACTGAAGGATGACGACTTTGAGAA	CTTGAGGCCTTTCTTACCCAGAAGCAGAAGGTGGGAGAACTGAAGGATGACGACTTTGAGAA	var59	27-A-A-G-G-T-G-G28	0	0	7	-	-	28,29,30,31,32,33,34		28	62
CTTGAGGCCTTTCTTACCCAGAAGCAG------GGAGAACTGAAGGATGACGACTTTGAGAA	CTTGAGGCCTTTCTTACCCAGAAGCAGAAGGTGGGAGAACTGAAGGATGACGACTTTGAGAA	var95	27-A-A-G-G-T-G29	0	0	6	-	-	28,29,30,31,32,33		28	62
CTTGAGGCCTTTCTTACCCAGAAGCAG-----GGGAGAACTGAAGGATGACGACTTTGAGAA	CTTGAGGCCTTTCTTACCCAGAAGCAGAAGGTGGGAGAACTGAAGGATGACGACTTTGAGAA	var1295	27-A-A-G-G-T30	0	0	5	-	-	28,29,30,31,32		28	62
CTTGAGGCCTTTCTTACCCAGAAGCAG-----GTAAGAACTGAAGGATGACGACTTTGAGAA	CTTGAGGCCTTTCTTACCCAGAAGCAGAAGGTGGGAGAACTGAAGGATGACGACTTTGAGAA	var886	27-A-A-G-G-T1TGAG27	2	0	5	34,35	-	28,29,30,31,32		28	62
CTTGAGGCCTTTCTTACCCAGAAGCAG----TGAGAGAACTGAAGGATGACGACTTTGAGAA	CTTGAGGCCTTTCTTACCCAGAAGCAGAAGGTGGGAGAACTGAAGGATGACGACTTTGAGAA	var1527	27-A-A-G-G2AG28	1	0	4	34	-	28,29,30,31		28	62
CTTGAGGCCTTTCTTACCCAGAAGCAG----TGGAGAGAACTGAAGGATGACGACTTTGAGAA	CTTGAGGCCTTTCTTACCCAGAAGCAGAAGGTGG-GAGAACTGAAGGATGACGACTTTGAGAA	var1536	27-A-A-G-G3A-28	0	1	0	-	35	-	35		63
CTTGAGGCCTTTCTTACCCAGAAGCAG----TGGGAGAACTGAAGGATGACGACTTTGAGAA	CTTGAGGCCTTTCTTACCCAGAAGCAGAAGGTGGGAGAACTGAAGGATGACGACTTTGAGAA	var16	27-A-A-G-G31	0	0	4	-	-	28,29,30,31		28	62
CTTGAGGCCTTTCTTACCCAGAAGCAG----TGGGATAACTGAAGGATGACGACTTTGAGAA	CTTGAGGCCTTTCTTACCCAGAAGCAGAAGGTGGGAGAACTGAAGGATGACGACTTTGAGAA	var1318	27-A-A-G-G5TG25	1	0	4	37	-	28,29,30,31		28	62
CTTGAGGCCTTTCTTACCCAGAAGCAG----TGGGTGAACTGAAGGATGACGACTTTGAGAA	CTTGAGGCCTTTCTTACCCAGAAGCAGAAGGTGGGAGAACTGAAGGATGACGACTTTGAGAA	var1648	27-A-A-G-G4TA26	1	0	4	36	-	28,29,30,31		28	62
CTTGAGGCCTTTCTTACCCAGAAGCAG---GCGGGAGAACTGAAGGATGACGACTTTGAGAA	CTTGAGGCCTTTCTTACCCAGAAGCAGAAGGTGGGAGAACTGAAGGATGACGACTTTGAGAA	var254	27-A-A-G1CT30	1	0	3	32	-	28,29,30		28	62
CTTGAGGCCTTTCTTACCCAGAAGCAG---GGGGGAGAACTGAAGGATGACGACTTTGAGAA	CTTGAGGCCTTTCTTACCCAGAAGCAGAAGGTGGGAGAACTGAAGGATGACGACTTTGAGAA	var594	27-A-A-G1GT30	1	0	3	32	-	28,29,30		28	62
CTTGAGGCCTTTCTTACCCAGAAGCAG---GTAAGAGAACTGAAGGATGACGACTTTGAGAA	CTTGAGGCCTTTCTTACCCAGAAGCAGAAGGTGGGAGAACTGAAGGATGACGACTTTGAGAA	var526	27-A-A-G2AGAG28	2	0	3	33,34	-	28,29,30		28	62
CTTGAGGCCTTTCTTACCCAGAAGCAG---GTAGGAGAACTGAAGGATGACGACTTTGAGAA	CTTGAGGCCTTTCTTACCCAGAAGCAGAAGGTGGGAGAACTGAAGGATGACGACTTTGAGAA	var203	27-A-A-G2AG29	1	0	3	33	-	28,29,30		28	62
CTTGAGGCCTTTCTTACCCAGAAGCAG---GTGAGAGAACTGAAGGATGACGACTTTGAGAA	CTTGAGGCCTTTCTTACCCAGAAGCAGAAGGTGGGAGAACTGAAGGATGACGACTTTGAGAA	var623	27-A-A-G3AG28	1	0	3	34	-	28,29,30		28	62
CTTGAGGCCTTTCTTACCCAGAAGCAG---GTGG-AGAACTGAAGGATGACGACTTTGAGAA	CTTGAGGCCTTTCTTACCCAGAAGCAGAAGGTGGGAGAACTGAAGGATGACGACTTTGAGAA	var137	27-A-A-G4-G27	0	0	4	-	-	28,29,30,35		28	62
CTTGAGGCCTTTCTTACCCAGAAGCAG---GTGGAAGAACTGAAGGATGACGACTTTGAGAA	CTTGAGGCCTTTCTTACCCAGAAGCAGAAGGTGGGAGAACTGAAGGATGACGACTTTGAGAA	var450	27-A-A-G4AG27	1	0	3	35	-	28,29,30		28	62
CTTGAGGCCTTTCTTACCCAGAAGCAG---GTGGAGAGAACTGAAGGATGACGACTTTGAGAA	CTTGAGGCCTTTCTTACCCAGAAGCAGAAGGTGG-GAGAACTGAAGGATGACGACTTTGAGAA	var419	27-A-A-G4A-28	0	1	0	-	35	-	35		63
CTTGAGGCCTTTCTTACCCAGAAGCAG---GTGGGAAAACTGAAGGATGACGACTTTGAGAA	CTTGAGGCCTTTCTTACCCAGAAGCAGAAGGTGGGAGAACTGAAGGATGACGACTTTGAGAA	var780	27-A-A-G6AG25	1	0	3	37	-	28,29,30		28	62
CTTGAGGCCTTTCTTACCCAGAAGCAG---GTGGGAGAAATGAAGGATGACGACTTTGAGAA	CTTGAGGCCTTTCTTACCCAGAAGCAGAAGGTGGGAGAACTGAAGGATGACGACTTTGAGAA	var558	27-A-A-G9AC22	1	0	3	40	-	28,29,30		28	62
CTTGAGGCCTTTCTTACCCAGAAGCAG---GTGGGAGAACAGAAGGATGACGACTTTGAGAA	CTTGAGGCCTTTCTTACCCAGAAGCAGAAGGTGGGAGAACTGAAGGATGACGACTTTGAGAA	var1209	27-A-A-G10AT21	1	0	3	41	-	28,29,30		28	62
CTTGAGGCCTTTCTTACCCAGAAGCAG---GTGGGAGAACCGAAGGATGACGACTTTGAGAA	CTTGAGGCCTTTCTTACCCAGAAGCAGAAGGTGGGAGAACTGAAGGATGACGACTTTGAGAA	var363	27-A-A-G10CT21	1	0	3	41	-	28,29,30		28	62
CTTGAGGCCTTTCTTACCCAGAAGCAG---GTGGGAGAACGGAAGGATGACGACTTTGAGAA	CTTGAGGCCTTTCTTACCCAGAAGCAGAAGGTGGGAGAACTGAAGGATGACGACTTTGAGAA	var1272	27-A-A-G10GT21	1	0	3	41	-	28,29,30		28	62
CTTGAGGCCTTTCTTACCCAGAAGCAG---GTGGGAGAACTAAAGGATGACGACTTTGAGAA	CTTGAGGCCTTTCTTACCCAGAAGCAGAAGGTGGGAGAACTGAAGGATGACGACTTTGAGAA	var188	27-A-A-G11AG20	1	0	3	42	-	28,29,30		28	62
CTTGAGGCCTTTCTTACCCAGAAGCAG---GTGGGAGAACTGAAAGATGACGACTTTGAGAA	CTTGAGGCCTTTCTTACCCAGAAGCAGAAGGTGGGAGAACTGAAGGATGACGACTTTGAGAA	var867	27-A-A-G14AG17	1	0	3	45	-	28,29,30		28	62
CTTGAGGCCTTTCTTACCCAGAAGCAG---GTGGGAGAACTGAAGAATGACGACTTTGAGAA	CTTGAGGCCTTTCTTACCCAGAAGCAGAAGGTGGGAGAACTGAAGGATGACGACTTTGAGAA	var866	27-A-A-G15AG16	1	0	3	46	-	28,29,30		28	62
CTTGAGGCCTTTCTTACCCAGAAGCAG---GTGGGAGAACTGAAGGACGACGACTTTGAGAA	CTTGAGGCCTTTCTTACCCAGAAGCAGAAGGTGGGAGAACTGAAGGATGACGACTTTGAGAA	var265	27-A-A-G17CT14	1	0	3	48	-	28,29,30		28	62
CTTGAGGCCTTTCTTACCCAGAAGCAG---GTGGGAGAACTGAAGGATAACGACTTTGAGAA	CTTGAGGCCTTTCTTACCCAGAAGCAGAAGGTGGGAGAACTGAAGGATGACGACTTTGAGAA	var672	27-A-A-G18AG13	1	0	3	49	-	28,29,30		28	62
CTTGAGGCCTTTCTTACCCAGAAGCAG---GTGGGAGAACTGAAGGATGAAGACTTTGAGAA	CTTGAGGCCTTTCTTACCCAGAAGCAGAAGGTGGGAGAACTGAAGGATGACGACTTTGAGAA	var1111	27-A-A-G20AC11	1	0	3	51	-	28,29,30		28	62
CTTGAGGCCTTTCTTACCCAGAAGCAG---GTGGGAGAACTGAAGGATGACAACTTTGAGAA	CTTGAGGCCTTTCTTACCCAGAAGCAGAAGGTGGGAGAACTGAAGGATGACGACTTTGAGAA	var581	27-A-A-G21AG10	1	0	3	52	-	28,29,30		28	62
CTTGAGGCCTTTCTTACCCAGAAGCAG---GTGGGAGAACTGAAGGATGACGAATTTGAGAA	CTTGAGGCCTTTCTTACCCAGAAGCAGAAGGTGGGAGAACTGAAGGATGACGACTTTGAGAA	var230	27-A-A-G23AC8	1	0	3	54	-	28,29,30		28	62
CTTGAGGCCTTTCTTACCCAGAAGCAG---GTGGGAGAACTGAAGGATGACGAC-TTGAGAA	CTTGAGGCCTTTCTTACCCAGAAGCAGAAGGTGGGAGAACTGAAGGATGACGACTTTGAGAA	var293	27-A-A-G24-T7	0	0	4	-	-	28,29,30,55		28	62
CTTGAGGCCTTTCTTACCCAGAAGCAG---GTGGGAGAACTGAAGGATGACGACATTGAGAA	CTTGAGGCCTTTCTTACCCAGAAGCAGAAGGTGGGAGAACTGAAGGATGACGACTTTGAGAA	var463	27-A-A-G24AT7	1	0	3	55	-	28,29,30		28	62
CTTGAGGCCTTTCTTACCCAGAAGCAG---GTGGGAGAACTGAAGGATGACGACCTTGAGAA	CTTGAGGCCTTTCTTACCCAGAAGCAGAAGGTGGGAGAACTGAAGGATGACGACTTTGAGAA	var973	27-A-A-G24CT7	1	0	3	55	-	28,29,30		28	62
CTTGAGGCCTTTCTTACCCAGAAGCAG---GTGGGAGAACTGAAGGATGACGACTCTGAGAA	CTTGAGGCCTTTCTTACCCAGAAGCAGAAGGTGGGAGAACTGAAGGATGACGACTTTGAGAA	var1475	27-A-A-G25CT6	1	0	3	56	-	28,29,30		28	62
CTTGAGGCCTTTCTTACCCAGAAGCAG---GTGGGAGAACTGAAGGATGACGACTTT	CTTGAGGCCTTTCTTACCCAGAAGCAGAAGGTGGGAGAACTGAAGGATGACGACTTT	var1183	27-A-A-G27	0	0	3	-	-	28,29,30		28	57
CTTGAGGCCTTTCTTACCCAGAAGCAG---GTGGGAGAACTGAAGGATGACGACTTT-AGAA	CTTGAGGCCTTTCTTACCCAGAAGCAGAAGGTGGGAGAACTGAAGGATGACGACTTTGAGAA	var1597	27-A-A-G27-G4	0	0	4	-	-	28,29,30,58		28	62
CTTGAGGCCTTTCTTACCCAGAAGCAG---GTGGGAGAACTGAAGGATGACGACTTTAAGAA	CTTGAGGCCTTTCTTACCCAGAAGCAGAAGGTGGGAGAACTGAAGGATGACGACTTTGAGAA	var624	27-A-A-G27AG4	1	0	3	58	-	28,29,30		28	62
CTTGAGGCCTTTCTTACCCAGAAGCAG---GTGGGAGAACTGAAGGATGACGACTTTG	CTTGAGGCCTTTCTTACCCAGAAGCAGAAGGTGGGAGAACTGAAGGATGACGACTTTG	var734	27-A-A-G28	0	0	3	-	-	28,29,30		28	58
CTTGAGGCCTTTCTTACCCAGAAGCAG---GTGGGAGAACTGAAGGATGACGACTTTGA	CTTGAGGCCTTTCTTACCCAGAAGCAGAAGGTGGGAGAACTGAAGGATGACGACTTTGA	var1442	27-A-A-G29	0	0	3	-	-	28,29,30		28	59
CTTGAGGCCTTTCTTACCCAGAAGCAG---GTGGGAGAACTGAAGGATGACGACTTTGA	CTTGAGGCCTTTCTTACCCAGAAGCAGAAGGTGGGAGAACTGAAGGATGACGACTTTGA	var202	27-A-A-G29	0	0	3	-	-	28,29,30		28	59
CTTGAGGCCTTTCTTACCCAGAAGCAG---GTGGGAGAACTGAAGGATGACGACTTTGAAAA	CTTGAGGCCTTTCTTACCCAGAAGCAGAAGGTGGGAGAACTGAAGGATGACGACTTTGAGAA	var733	27-A-A-G29AG2	1	0	3	60	-	28,29,30		28	62
CTTGAGGCCTTTCTTACCCAGAAGCAG---GTGGGAGAACTGAAGGATGACGACTTTGAG	CTTGAGGCCTTTCTTACCCAGAAGCAGAAGGTGGGAGAACTGAAGGATGACGACTTTGAG	var1406	27-A-A-G30	0	0	3	-	-	28,29,30		28	60
CTTGAGGCCTTTCTTACCCAGAAGCAG---GTGGGAGAACTGAAGGATGACGACTTTGAG	CTTGAGGCCTTTCTTACCCAGAAGCAGAAGGTGGGAGAACTGAAGGATGACGACTTTGAG	var958	27-A-A-G30	0	0	3	-	-	28,29,30		28	60
CTTGAGGCCTTTCTTACCCAGAAGCAG---GTGGGAGAACTGAAGGATGACGACTTTGAGA	CTTGAGGCCTTTCTTACCCAGAAGCAGAAGGTGGGAGAACTGAAGGATGACGACTTTGAGA	var1299	27-A-A-G31	0	0	3	-	-	28,29,30		28	61
CTTGAGGCCTTTCTTACCCAGAAGCAG---GTGGGAGAACTGAAGGATGACGACTTTGAGA	CTTGAGGCCTTTCTTACCCAGAAGCAGAAGGTGGGAGAACTGAAGGATGACGACTTTGAGA	var149	27-A-A-G31	0	0	3	-	-	28,29,30		28	61
CTTGAGGCCTTTCTTACCCAGAAGCAG---GTGGGAGAACTGAAGGATGACGACTTTGAGA	CTTGAGGCCTTTCTTACCCAGAAGCAGAAGGTGGGAGAACTGAAGGATGACGACTTTGAGA	var1560	27-A-A-G31	0	0	3	-	-	28,29,30		28	61
CTTGAGGCCTTTCTTACCCAGAAGCAG---GTGGGAGAACTGAAGGATGACGACTTTGAGAA	CTTGAGGCCTTTCTTACCCAGAAGCAGAAGGTGGGAGAACTGAAGGATGACGACTTTGAGAA	var1127	27-A-A-G32	0	0	3	-	-	28,29,30		28	62
CTTGAGGCCTTTCTTACCCAGAAGCAG---GTGGGAGAACTGAAGGATGACGACTTTGAGAA	CTTGAGGCCTTTCTTACCCAGAAGCAGAAGGTGGGAGAACTGAAGGATGACGACTTTGAGAA	var1257	27-A-A-G32	0	0	3	-	-	28,29,30		28	62
CTTGAGGCCTTTCTTACCCAGAAGCAG---GTGGGAGAACTGAAGGATGACGACTTTGAGAA	CTTGAGGCCTTTCTTACCCAGAAGCAGAAGGTGGGAGAACTGAAGGATGACGACTTTGAGAA	var1559	27-A-A-G32	0	0	3	-	-	28,29,30		28	62
CTTGAGGCCTTTCTTACCCAGAAGCAG---GTGGGAGAACTGAAGGATGACGACTTTGAGAA	CTTGAGGCCTTTCTTACCCAGAAGCAGAAGGTGGGAGAACTGAAGGATGACGACTTTGAGAA	var166	27-A-A-G32	0	0	3	-	-	28,29,30		28	62
CTTGAGGCCTTTCTTACCCAGAAGCAG---GTGGGAGAACTGAAGGATGACGACTTTGAGAA	CTTGAGGCCTTTCTTACCCAGAAGCAGAAGGTGGGAGAACTGAAGGATGACGACTTTGAGAA	var252	27-A-A-G32	0	0	3	-	-	28,29,30		28	62
CTTGAGGCCTTTCTTACCCAGAAGCAG---GTGGGAGAACTGAAGGATGACGACTTTGAGAA	CTTGAGGCCTTTCTTACCCAGAAGCAGAAGGTGGGAGAACTGAAGGATGACGACTTTGAGAA	var3	27-A-A-G32	0	0	3	-	-	28,29,30		28	62
CTTGAGGCCTTTCTTACCCAGAAGCAG---GTGGGAGAACTGAAGGATGACGACTTTGAGAA	CTTGAGGCCTTTCTTACCCAGAAGCAGAAGGTGGGAGAACTGAAGGATGACGACTTTGAGAA	var595	27-A-A-G32	0	0	3	-	-	28,29,30		28	62
CTTGAGGCCTTTCTTACCCAGAAGCAG---GTGGGAGAACTGAAGGATGACGACTTTGAGAA	CTTGAGGCCTTTCTTACCCAGAAGCAGAAGGTGGGAGAACTGAAGGATGACGACTTTGAGAA	var674	27-A-A-G32	0	0	3	-	-	28,29,30		28	62
CTTGAGGCCTTTCTTACCCAGAAGCAG---GTGGGAGAACTGAAGGATGACGACTTTGAGAA	CTTGAGGCCTTTCTTACCCAGAAGCAGAAGGTGGGAGAACTGAAGGATGACGACTTTGAGAA	var769	27-A-A-G32	0	0	3	-	-	28,29,30		28	62
CTTGAGGCCTTTCTTACCCAGAAGCAG---GTGGGAGAACTGAAGGATGACGACTTTGAGAA	CTTGAGGCCTTTCTTACCCAGAAGCAGAAGGTGGGAGAACTGAAGGATGACGACTTTGAGAA	var865	27-A-A-G32	0	0	3	-	-	28,29,30		28	62
CTTGAGGCCTTTCTTACCCAGAAGCAG---GTGGGAGAACTGAAGGATGACGACTTTGAGAA	CTTGAGGCCTTTCTTACCCAGAAGCAGAAGGTGGGAGAACTGAAGGATGACGACTTTGAGAA	var921	27-A-A-G32	0	0	3	-	-	28,29,30		28	62
CTTGAGGCCTTTCTTACCCAGAAGCAG---GTGGGAGAACTGAAGGATGACGACTTTGATAA	CTTGAGGCCTTTCTTACCCAGAAGCAGAAGGTGGGAGAACTGAAGGATGACGACTTTGAGAA	var1173	27-A-A-G29TG2	1	0	3	60	-	28,29,30		28	62
CTTGAGGCCTTTCTTACCCAGAAGCAG---GTGGGAGAACTGAAGGATGACGACTTTGCGAA	CTTGAGGCCTTTCTTACCCAGAAGCAGAAGGTGGGAGAACTGAAGGATGACGACTTTGAGAA	var1142	27-A-A-G28CA3	1	0	3	59	-	28,29,30		28	62
CTTGAGGCCTTTCTTACCCAGAAGCAG---GTGGGAGAACTGAAGGATGACGACTTTGGGAA	CTTGAGGCCTTTCTTACCCAGAAGCAGAAGGTGGGAGAACTGAAGGATGACGACTTTGAGAA	var1113	27-A-A-G28GA3	1	0	3	59	-	28,29,30		28	62
CTTGAGGCCTTTCTTACCCAGAAGCAG---GTGGGAGAACTGAAGGATGACGACTTTTAGAA	CTTGAGGCCTTTCTTACCCAGAAGCAGAAGGTGGGAGAACTGAAGGATGACGACTTTGAGAA	var868	27-A-A-G27TG4	1	0	3	58	-	28,29,30		28	62
CTTGAGGCCTTTCTTACCCAGAAGCAG---GTGGGAGAACTGAAGGATGACGATTTTGAGAA	CTTGAGGCCTTTCTTACCCAGAAGCAGAAGGTGGGAGAACTGAAGGATGACGACTTTGAGAA	var499	27-A-A-G23TC8	1	0	3	54	-	28,29,30		28	62
CTTGAGGCCTTTCTTACCCAGAAGCAG---GTGGGAGAACTGAAGGATGACGCCTTTGAGAA	CTTGAGGCCTTTCTTACCCAGAAGCAGAAGGTGGGAGAACTGAAGGATGACGACTTTGAGAA	var338	27-A-A-G22CA9	1	0	3	53	-	28,29,30		28	62
CTTGAGGCCTTTCTTACCCAGAAGCAG---GTGGGAGAACTGAAGGATGACTACTTTGAGAA	CTTGAGGCCTTTCTTACCCAGAAGCAGAAGGTGGGAGAACTGAAGGATGACGACTTTGAGAA	var961	27-A-A-G21TG10	1	0	3	52	-	28,29,30		28	62
CTTGAGGCCTTTCTTACCCAGAAGCAG---GTGGGAGAACTGAAGGATGATGACTTTGAGAA	CTTGAGGCCTTTCTTACCCAGAAGCAGAAGGTGGGAGAACTGAAGGATGACGACTTTGAGAA	var531	27-A-A-G20TC11	1	0	3	51	-	28,29,30		28	62
CTTGAGGCCTTTCTTACCCAGAAGCAG---GTGGGAGAACTGAAGGATGGCGACTTTGAGAA	CTTGAGGCCTTTCTTACCCAGAAGCAGAAGGTGGGAGAACTGAAGGATGACGACTTTGAGAA	var276	27-A-A-G19GA12	1	0	3	50	-	28,29,30		28	62
CTTGAGGCCTTTCTTACCCAGAAGCAG---GTGGGAGAACTGAAGGATGTCGACTTTGAGAA	CTTGAGGCCTTTCTTACCCAGAAGCAGAAGGTGGGAGAACTGAAGGATGACGACTTTGAGAA	var974	27-A-A-G19TA12	1	0	3	50	-	28,29,30		28	62
CTTGAGGCCTTTCTTACCCAGAAGCAG---GTGGGAGAACTGAAGGCTGACGACTTTGAGAA	CTTGAGGCCTTTCTTACCCAGAAGCAGAAGGTGGGAGAACTGAAGGATGACGACTTTGAGAA	var1157	27-A-A-G16CA15	1	0	3	47	-	28,29,30		28	62
CTTGAGGCCTTTCTTACCCAGAAGCAG---GTGGGAGAACTGAAGGGTGACGACTTTGAGAA	CTTGAGGCCTTTCTTACCCAGAAGCAGAAGGTGGGAGAACTGAAGGATGACGACTTTGAGAA	var429	27-A-A-G16GA15	1	0	3	47	-	28,29,30		28	62
CTTGAGGCCTTTCTTACCCAGAAGCAG---GTGGGAGAACTGACGGATGACGACTTTGAGAA	CTTGAGGCCTTTCTTACCCAGAAGCAGAAGGTGGGAGAACTGAAGGATGACGACTTTGAGAA	var983	27-A-A-G13CA18	1	0	3	44	-	28,29,30		28	62
CTTGAGGCCTTTCTTACCCAGAAGCAG---GTGGGAGAACTGAGGGATGACGACTTTGAGAA	CTTGAGGCCTTTCTTACCCAGAAGCAGAAGGTGGGAGAACTGAAGGATGACGACTTTGAGAA	var257	27-A-A-G13GA18	1	0	3	44	-	28,29,30		28	62
CTTGAGGCCTTTCTTACCCAGAAGCAG---GTGGGAGAACTGATGGATGACGACTTTGAGAA	CTTGAGGCCTTTCTTACCCAGAAGCAGAAGGTGGGAGAACTGAAGGATGACGACTTTGAGAA	var1099	27-A-A-G13TA18	1	0	3	44	-	28,29,30		28	62
CTTGAGGCCTTTCTTACCCAGAAGCAG---GTGGGAGAACTGCAGGATGACGACTTTGAGAA	CTTGAGGCCTTTCTTACCCAGAAGCAGAAGGTGGGAGAACTGAAGGATGACGACTTTGAGAA	var282	27-A-A-G12CA19	1	0	3	43	-	28,29,30		28	62
CTTGAGGCCTTTCTTACCCAGAAGCAG---GTGGGAGAACTGGAGGATGACGACTTTGAGAA	CTTGAGGCCTTTCTTACCCAGAAGCAGAAGGTGGGAGAACTGAAGGATGACGACTTTGAGAA	var480	27-A-A-G12GA19	1	0	3	43	-	28,29,30		28	62
CTTGAGGCCTTTCTTACCCAGAAGCAG---GTGGGAGAACTGTAGGATGACGACTTTGAGAA	CTTGAGGCCTTTCTTACCCAGAAGCAGAAGGTGGGAGAACTGAAGGATGACGACTTTGAGAA	var1297	27-A-A-G12TA19	1	0	3	43	-	28,29,30		28	62
CTTGAGGCCTTTCTTACCCAGAAGCAG---GTGGGAGAATTGAAGGATGACGACTTTGAGAA	CTTGAGGCCTTTCTTACCCAGAAGCAGAAGGTGGGAGAACTGAAGGATGACGACTTTGAGAA	var833	27-A-A-G9TC22	1	0	3	40	-	28,29,30		28	62
CTTGAGGCCTTTCTTACCCAGAAGCAG---GTGGGAGAGCTGAAGGATGACGACTTTGAGAA	CTTGAGGCCTTTCTTACCCAGAAGCAGAAGGTGGGAGAACTGAAGGATGACGACTTTGAGAA	var344	27-A-A-G8GA23	1	0	3	39	-	28,29,30		28	62
CTTGAGGCCTTTCTTACCCAGAAGCAG---GTGGGAGCACTGAAGGATGACGACTTTGAGAA	CTTGAGGCCTTTCTTACCCAGAAGCAGAAGGTGGGAGAACTGAAGGATGACGACTTTGAGAA	var640	27-A-A-G7CA24	1	0	3	38	-	28,29,30		28	62
CTTGAGGCCTTTCTTACCCAGAAGCAG---GTGGGAGGACTGAAGGATGACGACTTTGAGAA	CTTGAGGCCTTTCTTACCCAGAAGCAGAAGGTGGGAGAACTGAAGGATGACGACTTTGAGAA	var340	27-A-A-G7GA24	1	0	3	38	-	28,29,30		28	62
CTTGAGGCCTTTCTTACCCAGAAGCAG---GTGGGAGTACTGAAGGATGACGACTTTGAGAA	CTTGAGGCCTTTCTTACCCAGAAGCAGAAGGTGGGAGAACTGAAGGATGACGACTTTGAGAA	var1374	27-A-A-G7TA24	1	0	3	38	-	28,29,30		28	62
CTTGAGGCCTTTCTTACCCAGAAGCAG---GTGGGCGAACTGAAGGATGACGACTTTGAGAA	CTTGAGGCCTTTCTTACCCAGAAGCAGAAGGTGGGAGAACTGAAGGATGACGACTTTGAGAA	var381	27-A-A-G5CA26	1	0	3	36	-	28,29,30		28	62
CTTGAGGCCTTTCTTACCCAGAAGCAG---GTGGGGGAACTGAAGGATGACGACTTTGAGAA	CTTGAGGCCTTTCTTACCCAGAAGCAGAAGGTGGGAGAACTGAAGGATGACGACTTTGAGAA	var231	27-A-A-G5GA26	1	0	3	36	-	28,29,30		28	62
CTTGAGGCCTTTCTTACCCAGAAGCAG---GTGGGTGAACTGAAGGATGACGACTTTGAGAA	CTTGAGGCCTTTCTTACCCAGAAGCAGAAGGTGGGAGAACTGAAGGATGACGACTTTGAGAA	var151	27-A-A-G5TA26	1	0	3	36	-	28,29,30		28	62
CTTGAGGCCTTTCTTACCCAGAAGCAG---GTGGTAGAACTGAAGGATGACGACTTTGAGAA	CTTGAGGCCTTTCTTACCCAGAAGCAGAAGGTGGGAGAACTGAAGGATGACGACTTTGAGAA	var758	27-A-A-G4TG27	1	0	3	35	-	28,29,30		28	62
CTTGAGGCCTTTCTTACCCAGAAGCAG---GTGTGAGAACTGAAGGATGACGACTTTGAGAA	CTTGAGGCCTTTCTTACCCAGAAGCAGAAGGTGGGAGAACTGAAGGATGACGACTTTGAGAA	var869	27-A-A-G3TG28	1	0	3	34	-	28,29,30		28	62
CTTGAGGCCTTTCTTACCCAGAAGCAG--GGT-----AA--GAAGGATGACGACTTTGAGAA	CTTGAGGCCTTTCTTACCCAGAAGCAGAAGGTGGGAGAACTGAAGGATGACGACTTTGAGAA	var790	27-A-A3-G-G-G-A-G2-C-T21	0	0	9	-	-	28,29,33,34,35,36,37,40,41		28	62
CTTGAGGCCTTTCTTACCCAGAAGCAG--GGT-----AACTGAAGGATGACGACTTTGAGAA	CTTGAGGCCTTTCTTACCCAGAAGCAGAAGGTGGGAGAACTGAAGGATGACGACTTTGAGAA	var687	27-A-A3-G-G-G-A-G25	0	0	7	-	-	28,29,33,34,35,36,37		28	62
CTTGAGGCCTTTCTTACCCAGAAGCAG--GGT--AAGAACTGAAGGATGACGACTTTGAGAA	CTTGAGGCCTTTCTTACCCAGAAGCAGAAGGTGGGAGAACTGAAGGATGACGACTTTGAGAA	var1219	27-A-A3-G-GAG27	1	0	4	35	-	28,29,33,34		28	62
CTTGAGGCCTTTCTTACCCAGAAGCAG--GGTGGGAGAACTGAAGGATGACGACTTTGAGAA	CTTGAGGCCTTTCTTACCCAGAAGCAGAAGGTGGGAGAACTGAAGGATGACGACTTTGAGAA	var236	27-A-A33	0	0	2	-	-	28,29		28	62
CTTGAGGCCTTTCTTACCCAGAAGCAG-AGGTGGGAGAACTGAAGGATGACGAC-TTGAGAA	CTTGAGGCCTTTCTTACCCAGAAGCAGAAGGTGGGAGAACTGAAGGATGACGACTTTGAGAA	var709	27-A26-T7	0	0	2	-	-	28,55		28	62
CTTGAGGCCTTTCTTACCCAGAAGCAG-TGGTG----------AGGATGACGACTTTGAGAA	CTTGAGGCCTTTCTTACCCAGAAGCAGAAGGTGGGAGAACTGAAGGATGACGACTTTGAGAA	var1149	27-ATA4-G-G-A-G-A-A-C-T-G-A19	1	0	11	29	-	28,34,35,36,37,38,39,40,41,42,43		28	62
CTTGAGGCCTTTCTTACCCAGAAGCAGA	CTTGAGGCCTTTCTTACCCAGAAGCAGA	var1006	28	0	0	34	-	-	29,30,31,32,33,34,35,36,37,38,39,40,41,42,43,44,45,46,47,48,49,50,51,52,53,54,55,56,57,58,59,60,61,62	-	29	28
CTTGAGGCCTTTCTTACCCAGAAGCAGA	CTTGAGGCCTTTCTTACCCAGAAGCAGA	var1018	28	0	0	34	-	-	29,30,31,32,33,34,35,36,37,38,39,40,41,42,43,44,45,46,47,48,49,50,51,52,53,54,55,56,57,58,59,60,61,62	-	29	28
CTTGAGGCCTTTCTTACCCAGAAGCAGA	CTTGAGGCCTTTCTTACCCAGAAGCAGA	var1120	28	0	0	34	-	-	29,30,31,32,33,34,35,36,37,38,39,40,41,42,43,44,45,46,47,48,49,50,51,52,53,54,55,56,57,58,59,60,61,62	-	29	28
CTTGAGGCCTTTCTTACCCAGAAGCAGA	CTTGAGGCCTTTCTTACCCAGAAGCAGA	var1161	28	0	0	34	-	-	29,30,31,32,33,34,35,36,37,38,39,40,41,42,43,44,45,46,47,48,49,50,51,52,53,54,55,56,57,58,59,60,61,62	-	29	28
CTTGAGGCCTTTCTTACCCAGAAGCAGA	CTTGAGGCCTTTCTTACCCAGAAGCAGA	var1220	28	0	0	34	-	-	29,30,31,32,33,34,35,36,37,38,39,40,41,42,43,44,45,46,47,48,49,50,51,52,53,54,55,56,57,58,59,60,61,62	-	29	28
CTTGAGGCCTTTCTTACCCAGAAGCAGA	CTTGAGGCCTTTCTTACCCAGAAGCAGA	var1284	28	0	0	34	-	-	29,30,31,32,33,34,35,36,37,38,39,40,41,42,43,44,45,46,47,48,49,50,51,52,53,54,55,56,57,58,59,60,61,62	-	29	28
CTTGAGGCCTTTCTTACCCAGAAGCAGA	CTTGAGGCCTTTCTTACCCAGAAGCAGA	var1356	28	0	0	34	-	-	29,30,31,32,33,34,35,36,37,38,39,40,41,42,43,44,45,46,47,48,49,50,51,52,53,54,55,56,57,58,59,60,61,62	-	29	28
CTTGAGGCCTTTCTTACCCAGAAGCAGA	CTTGAGGCCTTTCTTACCCAGAAGCAGA	var1424	28	0	0	34	-	-	29,30,31,32,33,34,35,36,37,38,39,40,41,42,43,44,45,46,47,48,49,50,51,52,53,54,55,56,57,58,59,60,61,62	-	29	28
CTTGAGGCCTTTCTTACCCAGAAGCAGA	CTTGAGGCCTTTCTTACCCAGAAGCAGA	var1434	28	0	0	34	-	-	29,30,31,32,33,34,35,36,37,38,39,40,41,42,43,44,45,46,47,48,49,50,51,52,53,54,55,56,57,58,59,60,61,62	-	29	28
CTTGAGGCCTTTCTTACCCAGAAGCAGA	CTTGAGGCCTTTCTTACCCAGAAGCAGA	var1458	28	0	0	34	-	-	29,30,31,32,33,34,35,36,37,38,39,40,41,42,43,44,45,46,47,48,49,50,51,52,53,54,55,56,57,58,59,60,61,62	-	29	28
CTTGAGGCCTTTCTTACCCAGAAGCAGA	CTTGAGGCCTTTCTTACCCAGAAGCAGA	var1500	28	0	0	34	-	-	29,30,31,32,33,34,35,36,37,38,39,40,41,42,43,44,45,46,47,48,49,50,51,52,53,54,55,56,57,58,59,60,61,62	-	29	28
CTTGAGGCCTTTCTTACCCAGAAGCAGA	CTTGAGGCCTTTCTTACCCAGAAGCAGA	var1541	28	0	0	34	-	-	29,30,31,32,33,34,35,36,37,38,39,40,41,42,43,44,45,46,47,48,49,50,51,52,53,54,55,56,57,58,59,60,61,62	-	29	28
CTTGAGGCCTTTCTTACCCAGAAGCAGA	CTTGAGGCCTTTCTTACCCAGAAGCAGA	var1614	28	0	0	34	-	-	29,30,31,32,33,34,35,36,37,38,39,40,41,42,43,44,45,46,47,48,49,50,51,52,53,54,55,56,57,58,59,60,61,62	-	29	28
CTTGAGGCCTTTCTTACCCAGAAGCAGA	CTTGAGGCCTTTCTTACCCAGAAGCAGA	var219	28	0	0	34	-	-	29,30,31,32,33,34,35,36,37,38,39,40,41,42,43,44,45,46,47,48,49,50,51,52,53,54,55,56,57,58,59,60,61,62	-	29	28
CTTGAGGCCTTTCTTACCCAGAAGCAGA	CTTGAGGCCTTTCTTACCCAGAAGCAGA	var280	28	0	0	34	-	-	29,30,31,32,33,34,35,36,37,38,39,40,41,42,43,44,45,46,47,48,49,50,51,52,53,54,55,56,57,58,59,60,61,62	-	29	28
CTTGAGGCCTTTCTTACCCAGAAGCAGA	CTTGAGGCCTTTCTTACCCAGAAGCAGA	var36	28	0	0	34	-	-	29,30,31,32,33,34,35,36,37,38,39,40,41,42,43,44,45,46,47,48,49,50,51,52,53,54,55,56,57,58,59,60,61,62	-	29	28
CTTGAGGCCTTTCTTACCCAGAAGCAGA	CTTGAGGCCTTTCTTACCCAGAAGCAGA	var405	28	0	0	34	-	-	29,30,31,32,33,34,35,36,37,38,39,40,41,42,43,44,45,46,47,48,49,50,51,52,53,54,55,56,57,58,59,60,61,62	-	29	28
CTTGAGGCCTTTCTTACCCAGAAGCAGA	CTTGAGGCCTTTCTTACCCAGAAGCAGA	var476	28	0	0	34	-	-	29,30,31,32,33,34,35,36,37,38,39,40,41,42,43,44,45,46,47,48,49,50,51,52,53,54,55,56,57,58,59,60,61,62	-	29	28
CTTGAGGCCTTTCTTACCCAGAAGCAGA	CTTGAGGCCTTTCTTACCCAGAAGCAGA	var51	28	0	0	34	-	-	29,30,31,32,33,34,35,36,37,38,39,40,41,42,43,44,45,46,47,48,49,50,51,52,53,54,55,56,57,58,59,60,61,62	-	29	28
CTTGAGGCCTTTCTTACCCAGAAGCAGA	CTTGAGGCCTTTCTTACCCAGAAGCAGA	var705	28	0	0	34	-	-	29,30,31,32,33,34,35,36,37,38,39,40,41,42,43,44,45,46,47,48,49,50,51,52,53,54,55,56,57,58,59,60,61,62	-	29	28
CTTGAGGCCTTTCTTACCCAGAAGCAGA	CTTGAGGCCTTTCTTACCCAGAAGCAGA	var818	28	0	0	34	-	-	29,30,31,32,33,34,35,36,37,38,39,40,41,42,43,44,45,46,47,48,49,50,51,52,53,54,55,56,57,58,59,60,61,62	-	29	28
CTTGAGGCCTTTCTTACCCAGAAGCAGA	CTTGAGGCCTTTCTTACCCAGAAGCAGA	var919	28	0	0	34	-	-	29,30,31,32,33,34,35,36,37,38,39,40,41,42,43,44,45,46,47,48,49,50,51,52,53,54,55,56,57,58,59,60,61,62	-	29	28
CTTGAGGCCTTTCTTACCCAGAAGCAGA	CTTGAGGCCTTTCTTACCCAGAAGCAGA	var94	28	0	0	34	-	-	29,30,31,32,33,34,35,36,37,38,39,40,41,42,43,44,45,46,47,48,49,50,51,52,53,54,55,56,57,58,59,60,61,62	-	29	28
CTTGAGGCCTTTCTTACCCAGAAGCAGA	CTTGAGGCCTTTCTTACCCAGAAGCAGA	var98	28	0	0	34	-	-	29,30,31,32,33,34,35,36,37,38,39,40,41,42,43,44,45,46,47,48,49,50,51,52,53,54,55,56,57,58,59,60,61,62	-	29	28
CTTGAGGCCTTTCTTACCCAGAAGCAGA--------------AAGGATGACGACTTTGAGAA	CTTGAGGCCTTTCTTACCCAGAAGCAGAAGGTGGGAGAACTGAAGGATGACGACTTTGAGAA	var157	28-A-G-G-T-G-G-G-A-G-A-A-C-T-G20	0	0	14	-	-	29,30,31,32,33,34,35,36,37,38,39,40,41,42		29	62
CTTGAGGCCTTTCTTACCCAGAAGCAGA--------------GAGGATGACGACTTTGAGAA	CTTGAGGCCTTTCTTACCCAGAAGCAGAAGGTGGGAGAACTGAAGGATGACGACTTTGAGAA	var1343	28-A-G-G-T-G-G-G-A-G-A-A-C-T-GGA19	1	0	14	43	-	29,30,31,32,33,34,35,36,37,38,39,40,41,42		29	62
CTTGAGGCCTTTCTTACCCAGAAGCAGA-------------GAAGGATGACGACTTTGAGAA	CTTGAGGCCTTTCTTACCCAGAAGCAGAAGGTGGGAGAACTGAAGGATGACGACTTTGAGAA	var80	28-A-G-G-T-G-G-G-A-G-A-A-C-T21	0	0	13	-	-	29,30,31,32,33,34,35,36,37,38,39,40,41		29	62
CTTGAGGCCTTTCTTACCCAGAAGCAGA------------GGAAGGATGACGACTTTGAGAA	CTTGAGGCCTTTCTTACCCAGAAGCAGAAGGTGGGAGAACTGAAGGATGACGACTTTGAGAA	var343	28-A-G-G-T-G-G-G-A-G-A-A-CGT21	1	0	12	41	-	29,30,31,32,33,34,35,36,37,38,39,40		29	62
CTTGAGGCCTTTCTTACCCAGAAGCAGA------------TGAAGGATGACGACTTTGAGAA	CTTGAGGCCTTTCTTACCCAGAAGCAGAAGGTGGGAGAACTGAAGGATGACGACTTTGAGAA	var359	28-A-G-G-T-G-G-G-A-G-A-A-C22	0	0	12	-	-	29,30,31,32,33,34,35,36,37,38,39,40		29	62
CTTGAGGCCTTTCTTACCCAGAAGCAGA---------AACTGAAGGATGACGACTTTGAGAA	CTTGAGGCCTTTCTTACCCAGAAGCAGAAGGTGGGAGAACTGAAGGATGACGACTTTGAGAA	var97	28-A-G-G-T-G-G-G-A-G25	0	0	9	-	-	29,30,31,32,33,34,35,36,37		29	62
CTTGAGGCCTTTCTTACCCAGAAGCAGA---------ACTTGAAGGATGACGACTTTGAGAA	CTTGAGGCCTTTCTTACCCAGAAGCAGAAGGTGGGAGAACTGAAGGATGACGACTTTGAGAA	var1357	28-A-G-G-T-G-G-G-A-G1CATC22	2	0	9	39,40	-	29,30,31,32,33,34,35,36,37		29	62
CTTGAGGCCTTTCTTACCCAGAAGCAGA---------GACTGAAGGATGACGACTTTGAGAA	CTTGAGGCCTTTCTTACCCAGAAGCAGAAGGTGGGAGAACTGAAGGATGACGACTTTGAGAA	var503	28-A-G-G-T-G-G-G-A-GGA24	1	0	9	38	-	29,30,31,32,33,34,35,36,37		29	62
CTTGAGGCCTTTCTTACCCAGAAGCAGA--------GAACTGAAGAGATGA	CTTGAGGCCTTTCTTACCCAGAAGCAGAAGGTGGGAGAACTGAAG-GATGA	var1569	28-A-G-G-T-G-G-G-A9A-5	0	1	0	-	46	-	46		51
CTTGAGGCCTTTCTTACCCAGAAGCAGA-------AGAACTGAAGGATGACGACTTTGAGAA	CTTGAGGCCTTTCTTACCCAGAAGCAGAAGGTGGGAGAACTGAAGGATGACGACTTTGAGAA	var35	28-A-G-G-T-G-G-G27	0	0	7	-	-	29,30,31,32,33,34,35		29	62
CTTGAGGCCTTTCTTACCCAGAAGCAGA-------GGAACTGAAGGATGACGACTTTGAGAA	CTTGAGGCCTTTCTTACCCAGAAGCAGAAGGTGGGAGAACTGAAGGATGACGACTTTGAGAA	var1520	28-A-G-G-T-G-G-GGA26	1	0	7	36	-	29,30,31,32,33,34,35		29	62
CTTGAGGCCTTTCTTACCCAGAAGCAGA-------TGAACTGAAGGATGACGACTTTGAGAA	CTTGAGGCCTTTCTTACCCAGAAGCAGAAGGTGGGAGAACTGAAGGATGACGACTTTGAGAA	var849	28-A-G-G-T-G-G-GTA26	1	0	7	36	-	29,30,31,32,33,34,35		29	62
CTTGAGGCCTTTCTTACCCAGAAGCAGA------CAGAACTGAAGGATGACGACTTTGAGAA	CTTGAGGCCTTTCTTACCCAGAAGCAGAAGGTGGGAGAACTGAAGGATGACGACTTTGAGAA	var928	28-A-G-G-T-G-GCG27	1	0	6	35	-	29,30,31,32,33,34		29	62
CTTGAGGCCTTTCTTACCCAGAAGCAGA------GA------AAGGATGACGACTTTGAGAA	CTTGAGGCCTTTCTTACCCAGAAGCAGAAGGTGGGAGAACTGAAGGATGACGACTTTGAGAA	var715	28-A-G-G-T-G-G2-G-A-A-C-T-G20	0	0	12	-	-	29,30,31,32,33,34,37,38,39,40,41,42		29	62
CTTGAGGCCTTTCTTACCCAGAAGCAGA------GAGAACTGAA-GATGACGACTTTGAGAA	CTTGAGGCCTTTCTTACCCAGAAGCAGAAGGTGGGAGAACTGAAGGATGACGACTTTGAGAA	var1150	28-A-G-G-T-G-G10-G17	0	0	7	-	-	29,30,31,32,33,34,45		29	62
CTTGAGGCCTTTCTTACCCAGAAGCAGA------GAGAACTGAAGGATGACGACTTTGAGAA	CTTGAGGCCTTTCTTACCCAGAAGCAGAAGGTGGGAGAACTGAAGGATGACGACTTTGAGAA	var24	28-A-G-G-T-G-G28	0	0	6	-	-	29,30,31,32,33,34		29	62
CTTGAGGCCTTTCTTACCCAGAAGCAGA-----GGAGAACTGAAGGATGACGACTTTGAGAA	CTTGAGGCCTTTCTTACCCAGAAGCAGAAGGTGGGAGAACTGAAGGATGACGACTTTGAGAA	var55	28-A-G-G-T-G29	0	0	5	-	-	29,30,31,32,33		29	62
CTTGAGGCCTTTCTTACCCAGAAGCAGA-----TGAGAACTGAAGGATGACGACTTTGAGAA	CTTGAGGCCTTTCTTACCCAGAAGCAGAAGGTGGGAGAACTGAAGGATGACGACTTTGAGAA	var839	28-A-G-G-T-GTG28	1	0	5	34	-	29,30,31,32,33		29	62
CTTGAGGCCTTTCTTACCCAGAAGCAGA----GAGAGAACTGAAGGATGACGACTTTGAGAA	CTTGAGGCCTTTCTTACCCAGAAGCAGAAGGTGGGAGAACTGAAGGATGACGACTTTGAGAA	var494	28-A-G-G-T1AG28	1	0	4	34	-	29,30,31,32		29	62
CTTGAGGCCTTTCTTACCCAGAAGCAGA----GGGAGAACTGAAGGATGACGACTTTGAGAA	CTTGAGGCCTTTCTTACCCAGAAGCAGAAGGTGGGAGAACTGAAGGATGACGACTTTGAGAA	var87	28-A-G-G-T30	0	0	4	-	-	29,30,31,32		29	62
CTTGAGGCCTTTCTTACCCAGAAGCAGA---CGGGAGAACTGAAG	CTTGAGGCCTTTCTTACCCAGAAGCAGAAGGTGGGAGAACTGAAG	var1332	28-A-G-GCT13	1	0	3	32	-	29,30,31		29	45
CTTGAGGCCTTTCTTACCCAGAAGCAGA---TGACTTACCCAGAAGGATGACGACTTTGAGAA	CTTGAGGCCTTTCTTACCCAGAAGCAGAAGGTGGGAGA-ACTGAAGGATGACGACTTTGAGAA	var1577	28-A-G-G2AGCGTATG1C-CA1AT21	6	1	3	34,35,36,37,41,43	39	29,30,31	39	29	63
CTTGAGGCCTTTCTTACCCAGAAGCAGA---TGGGAGAACTGAAGGATGACGACTTTGAGAA	CTTGAGGCCTTTCTTACCCAGAAGCAGAAGGTGGGAGAACTGAAGGATGACGACTTTGAGAA	var18	28-A-G-G31	0	0	3	-	-	29,30,31		29	62
CTTGAGGCCTTTCTTACCCAGAAGCAGA--CTAAGAG-ACTGAAGGATGACGACTTTGAGAA	CTTGAGGCCTTTCTTACCCAGAAGCAGAAGGTGGGAGAACTGAAGGATGACGACTTTGAGAA	var1341	28-A-GCG1AGAG3-A24	3	0	3	31,33,34	-	29,30,38		29	62
CTTGAGGCCTTTCTTACCCAGAAGCAGA--GAGGGAGAACTGAAGGATGACGACTTTGAGAA	CTTGAGGCCTTTCTTACCCAGAAGCAGAAGGTGGGAGAACTGAAGGATGACGACTTTGAGAA	var1226	28-A-G1AT30	1	0	2	32	-	29,30		29	62
CTTGAGGCCTTTCTTACCCAGAAGCAGA--GCTGGAGAACTGAAGGATGACGACTTTGAGAA	CTTGAGGCCTTTCTTACCCAGAAGCAGAAGGTGGGAGAACTGAAGGATGACGACTTTGAGAA	var496	28-A-G1CTTG29	2	0	2	32,33	-	29,30		29	62
CTTGAGGCCTTTCTTACCCAGAAGCAGA--GTAGGAGAACTGAAGGATGACGACTTTGAGAA	CTTGAGGCCTTTCTTACCCAGAAGCAGAAGGTGGGAGAACTGAAGGATGACGACTTTGAGAA	var1182	28-A-G2AG29	1	0	2	33	-	29,30		29	62
CTTGAGGCCTTTCTTACCCAGAAGCAGA--GTGGGA----TGAAGGATGACGACTTTGAGAA	CTTGAGGCCTTTCTTACCCAGAAGCAGAAGGTGGGAGAACTGAAGGATGACGACTTTGAGAA	var1522	28-A-G6-G-A-A-C22	0	0	6	-	-	29,30,37,38,39,40		29	62
CTTGAGGCCTTTCTTACCCAGAAGCAGA--GTGGGAGAACTGAAGGATGACGACTTTGAGAA	CTTGAGGCCTTTCTTACCCAGAAGCAGAAGGTGGGAGAACTGAAGGATGACGACTTTGAGAA	var19	28-A-G32	0	0	2	-	-	29,30		29	62
CTTGAGGCCTTTCTTACCCAGAAGCAGA-GAAGGGAGAACTGAAGGATGACGACTTTGAGAA	CTTGAGGCCTTTCTTACCCAGAAGCAGAAGGTGGGAGAACTGAAGGATGACGACTTTGAGAA	var1016	28-A1AGAT30	2	0	1	31,32	-	29		29	62
CTTGAGGCCTTTCTTACCCAGAAGCAGA-GATGGGAGAACTGAAGGATGACGACTTTGAGAA	CTTGAGGCCTTTCTTACCCAGAAGCAGAAGGTGGGAGAACTGAAGGATGACGACTTTGAGAA	var684	28-A1AG31	1	0	1	31	-	29		29	62
CTTGAGGCCTTTCTTACCCAGAAGCAGA-GGAGGGAGAACTGAAGGATGACGACTTTGAGAA	CTTGAGGCCTTTCTTACCCAGAAGCAGAAGGTGGGAGAACTGAAGGATGACGACTTTGAGAA	var892	28-A2AT30	1	0	1	32	-	29		29	62
CTTGAGGCCTTTCTTACCCAGAAGCAGA-GGCGGGAGAACTGAAGGATGACGACTTTGAGAA	CTTGAGGCCTTTCTTACCCAGAAGCAGAAGGTGGGAGAACTGAAGGATGACGACTTTGAGAA	var1627	28-A2CT30	1	0	1	32	-	29		29	62
CTTGAGGCCTTTCTTACCCAGAAGCAGA-GGTGG-AGAACTGAAGGATGACGACTTTGAGAA	CTTGAGGCCTTTCTTACCCAGAAGCAGAAGGTGGGAGAACTGAAGGATGACGACTTTGAGAA	var1440	28-A5-G27	0	0	2	-	-	29,35		29	62
CTTGAGGCCTTTCTTACCCAGAAGCAGA-GGTGGGAGAAATGAAGGATGACGACTTTGAGAA	CTTGAGGCCTTTCTTACCCAGAAGCAGAAGGTGGGAGAACTGAAGGATGACGACTTTGAGAA	var1268	28-A10AC22	1	0	1	40	-	29		29	62
CTTGAGGCCTTTCTTACCCAGAAGCAGA-GGTGGGAGAACCGAAGGATGACGACTTTGAGAA	CTTGAGGCCTTTCTTACCCAGAAGCAGAAGGTGGGAGAACTGAAGGATGACGACTTTGAGAA	var683	28-A11CT21	1	0	1	41	-	29		29	62
CTTGAGGCCTTTCTTACCCAGAAGCAGA-GGTGGGAGAACTAAAGGATGACGACTTTGAGAA	CTTGAGGCCTTTCTTACCCAGAAGCAGAAGGTGGGAGAACTGAAGGATGACGACTTTGAGAA	var536	28-A12AG20	1	0	1	42	-	29		29	62
CTTGAGGCCTTTCTTACCCAGAAGCAGA-GGTGGGAGAACTGAAAGATGACGACTTTGAGAA	CTTGAGGCCTTTCTTACCCAGAAGCAGAAGGTGGGAGAACTGAAGGATGACGACTTTGAGAA	var1298	28-A15AG17	1	0	1	45	-	29		29	62
CTTGAGGCCTTTCTTACCCAGAAGCAGA-GGTGGGAGAACTGAAGGACGACGACTTTGAGAA	CTTGAGGCCTTTCTTACCCAGAAGCAGAAGGTGGGAGAACTGAAGGATGACGACTTTGAGAA	var635	28-A18CT14	1	0	1	48	-	29		29	62
CTTGAGGCCTTTCTTACCCAGAAGCAGA-GGTGGGAGAACTGAAGGATGAAGACTTTGAGAA	CTTGAGGCCTTTCTTACCCAGAAGCAGAAGGTGGGAGAACTGAAGGATGACGACTTTGAGAA	var1377	28-A21AC11	1	0	1	51	-	29		29	62
CTTGAGGCCTTTCTTACCCAGAAGCAGA-GGTGGGAGAACTGAAGGATGACAACTTTGAGAA	CTTGAGGCCTTTCTTACCCAGAAGCAGAAGGTGGGAGAACTGAAGGATGACGACTTTGAGAA	var1438	28-A22AG10	1	0	1	52	-	29		29	62
CTTGAGGCCTTTCTTACCCAGAAGCAGA-GGTGGGAGAACTGAAGGATGACGAATTTGAGAA	CTTGAGGCCTTTCTTACCCAGAAGCAGAAGGTGGGAGAACTGAAGGATGACGACTTTGAGAA	var479	28-A24AC8	1	0	1	54	-	29		29	62
CTTGAGGCCTTTCTTACCCAGAAGCAGA-GGTGGGAGAACTGAAGGATGACGACCTTGAGAA	CTTGAGGCCTTTCTTACCCAGAAGCAGAAGGTGGGAGAACTGAAGGATGACGACTTTGAGAA	var1596	28-A25CT7	1	0	1	55	-	29		29	62
CTTGAGGCCTTTCTTACCCAGAAGCAGA-GGTGGGAGAACTGAAGGATGACGACTTTGA	CTTGAGGCCTTTCTTACCCAGAAGCAGAAGGTGGGAGAACTGAAGGATGACGACTTTGA	var530	28-A30	0	0	1	-	-	29		29	59
CTTGAGGCCTTTCTTACCCAGAAGCAGA-GGTGGGAGAACTGAAGGATGACGACTTTGAAAA	CTTGAGGCCTTTCTTACCCAGAAGCAGAAGGTGGGAGAACTGAAGGATGACGACTTTGAGAA	var1375	28-A30AG2	1	0	1	60	-	29		29	62
CTTGAGGCCTTTCTTACCCAGAAGCAGA-GGTGGGAGAACTGAAGGATGACGACTTTGAG	CTTGAGGCCTTTCTTACCCAGAAGCAGAAGGTGGGAGAACTGAAGGATGACGACTTTGAG	var1259	28-A31	0	0	1	-	-	29		29	60
CTTGAGGCCTTTCTTACCCAGAAGCAGA-GGTGGGAGAACTGAAGGATGACGACTTTGAGA	CTTGAGGCCTTTCTTACCCAGAAGCAGAAGGTGGGAGAACTGAAGGATGACGACTTTGAGA	var394	28-A32	0	0	1	-	-	29		29	61
CTTGAGGCCTTTCTTACCCAGAAGCAGA-GGTGGGAGAACTGAAGGATGACGACTTTGAGAA	CTTGAGGCCTTTCTTACCCAGAAGCAGAAGGTGGGAGAACTGAAGGATGACGACTTTGAGAA	var1515	28-A33	0	0	1	-	-	29		29	62
CTTGAGGCCTTTCTTACCCAGAAGCAGA-GGTGGGAGAACTGAAGGATGACGACTTTGAGAA	CTTGAGGCCTTTCTTACCCAGAAGCAGAAGGTGGGAGAACTGAAGGATGACGACTTTGAGAA	var333	28-A33	0	0	1	-	-	29		29	62
CTTGAGGCCTTTCTTACCCAGAAGCAGA-GGTGGGAGAACTGAAGGATGACGACTTTGAGAA	CTTGAGGCCTTTCTTACCCAGAAGCAGAAGGTGGGAGAACTGAAGGATGACGACTTTGAGAA	var4	28-A33	0	0	1	-	-	29		29	62
CTTGAGGCCTTTCTTACCCAGAAGCAGA-GGTGGGAGAACTGAAGGATGACGATTTTGAGAA	CTTGAGGCCTTTCTTACCCAGAAGCAGAAGGTGGGAGAACTGAAGGATGACGACTTTGAGAA	var1013	28-A24TC8	1	0	1	54	-	29		29	62
CTTGAGGCCTTTCTTACCCAGAAGCAGA-GGTGGGAGAACTGAAGGATGATGACTTTGAGAA	CTTGAGGCCTTTCTTACCCAGAAGCAGAAGGTGGGAGAACTGAAGGATGACGACTTTGAGAA	var1407	28-A21TC11	1	0	1	51	-	29		29	62
CTTGAGGCCTTTCTTACCCAGAAGCAGA-GGTGGGAGAACTGAAGGATGGCGACTTTGAGAA	CTTGAGGCCTTTCTTACCCAGAAGCAGAAGGTGGGAGAACTGAAGGATGACGACTTTGAGAA	var831	28-A20GA12	1	0	1	50	-	29		29	62
CTTGAGGCCTTTCTTACCCAGAAGCAGA-GGTGGGAGAACTGAAGGGTGACGACTTTGAGAA	CTTGAGGCCTTTCTTACCCAGAAGCAGAAGGTGGGAGAACTGAAGGATGACGACTTTGAGAA	var764	28-A17GA15	1	0	1	47	-	29		29	62
CTTGAGGCCTTTCTTACCCAGAAGCAGA-GGTGGGAGAACTGAGGGATGACGACTTTGAGAA	CTTGAGGCCTTTCTTACCCAGAAGCAGAAGGTGGGAGAACTGAAGGATGACGACTTTGAGAA	var702	28-A14GA18	1	0	1	44	-	29		29	62
CTTGAGGCCTTTCTTACCCAGAAGCAGA-GGTGGGAGAACTGGAGGATGACGACTTTGAGAA	CTTGAGGCCTTTCTTACCCAGAAGCAGAAGGTGGGAGAACTGAAGGATGACGACTTTGAGAA	var1294	28-A13GA19	1	0	1	43	-	29		29	62
CTTGAGGCCTTTCTTACCCAGAAGCAGA-GGTGGGAGAGCTGAAGGATGACGACTTTGAGAA	CTTGAGGCCTTTCTTACCCAGAAGCAGAAGGTGGGAGAACTGAAGGATGACGACTTTGAGAA	var1025	28-A9GA23	1	0	1	39	-	29		29	62
CTTGAGGCCTTTCTTACCCAGAAGCAGA-GGTGGGAGCACTGAAGGATGACGACTTTGAGAA	CTTGAGGCCTTTCTTACCCAGAAGCAGAAGGTGGGAGAACTGAAGGATGACGACTTTGAGAA	var1404	28-A8CA24	1	0	1	38	-	29		29	62
CTTGAGGCCTTTCTTACCCAGAAGCAGA-GGTGGGAGGACTGAAGGATGACGACTTTGAGAA	CTTGAGGCCTTTCTTACCCAGAAGCAGAAGGTGGGAGAACTGAAGGATGACGACTTTGAGAA	var700	28-A8GA24	1	0	1	38	-	29		29	62
CTTGAGGCCTTTCTTACCCAGAAGCAGA-GGTGGGGGAACTGAAGGATGACGACTTTGAGAA	CTTGAGGCCTTTCTTACCCAGAAGCAGAAGGTGGGAGAACTGAAGGATGACGACTTTGAGAA	var832	28-A6GA26	1	0	1	36	-	29		29	62
CTTGAGGCCTTTCTTACCCAGAAGCAGAA	CTTGAGGCCTTTCTTACCCAGAAGCAGAA	var1045	29	0	0	33	-	-	30,31,32,33,34,35,36,37,38,39,40,41,42,43,44,45,46,47,48,49,50,51,52,53,54,55,56,57,58,59,60,61,62	-	30	29
CTTGAGGCCTTTCTTACCCAGAAGCAGAA	CTTGAGGCCTTTCTTACCCAGAAGCAGAA	var1046	29	0	0	33	-	-	30,31,32,33,34,35,36,37,38,39,40,41,42,43,44,45,46,47,48,49,50,51,52,53,54,55,56,57,58,59,60,61,62	-	30	29
CTTGAGGCCTTTCTTACCCAGAAGCAGAA	CTTGAGGCCTTTCTTACCCAGAAGCAGAA	var1091	29	0	0	33	-	-	30,31,32,33,34,35,36,37,38,39,40,41,42,43,44,45,46,47,48,49,50,51,52,53,54,55,56,57,58,59,60,61,62	-	30	29
CTTGAGGCCTTTCTTACCCAGAAGCAGAA	CTTGAGGCCTTTCTTACCCAGAAGCAGAA	var1169	29	0	0	33	-	-	30,31,32,33,34,35,36,37,38,39,40,41,42,43,44,45,46,47,48,49,50,51,52,53,54,55,56,57,58,59,60,61,62	-	30	29
CTTGAGGCCTTTCTTACCCAGAAGCAGAA	CTTGAGGCCTTTCTTACCCAGAAGCAGAA	var1200	29	0	0	33	-	-	30,31,32,33,34,35,36,37,38,39,40,41,42,43,44,45,46,47,48,49,50,51,52,53,54,55,56,57,58,59,60,61,62	-	30	29
CTTGAGGCCTTTCTTACCCAGAAGCAGAA	CTTGAGGCCTTTCTTACCCAGAAGCAGAA	var1227	29	0	0	33	-	-	30,31,32,33,34,35,36,37,38,39,40,41,42,43,44,45,46,47,48,49,50,51,52,53,54,55,56,57,58,59,60,61,62	-	30	29
CTTGAGGCCTTTCTTACCCAGAAGCAGAA	CTTGAGGCCTTTCTTACCCAGAAGCAGAA	var1242	29	0	0	33	-	-	30,31,32,33,34,35,36,37,38,39,40,41,42,43,44,45,46,47,48,49,50,51,52,53,54,55,56,57,58,59,60,61,62	-	30	29
CTTGAGGCCTTTCTTACCCAGAAGCAGAA	CTTGAGGCCTTTCTTACCCAGAAGCAGAA	var1243	29	0	0	33	-	-	30,31,32,33,34,35,36,37,38,39,40,41,42,43,44,45,46,47,48,49,50,51,52,53,54,55,56,57,58,59,60,61,62	-	30	29
CTTGAGGCCTTTCTTACCCAGAAGCAGAA	CTTGAGGCCTTTCTTACCCAGAAGCAGAA	var1265	29	0	0	33	-	-	30,31,32,33,34,35,36,37,38,39,40,41,42,43,44,45,46,47,48,49,50,51,52,53,54,55,56,57,58,59,60,61,62	-	30	29
CTTGAGGCCTTTCTTACCCAGAAGCAGAA	CTTGAGGCCTTTCTTACCCAGAAGCAGAA	var1360	29	0	0	33	-	-	30,31,32,33,34,35,36,37,38,39,40,41,42,43,44,45,46,47,48,49,50,51,52,53,54,55,56,57,58,59,60,61,62	-	30	29
CTTGAGGCCTTTCTTACCCAGAAGCAGAA	CTTGAGGCCTTTCTTACCCAGAAGCAGAA	var1395	29	0	0	33	-	-	30,31,32,33,34,35,36,37,38,39,40,41,42,43,44,45,46,47,48,49,50,51,52,53,54,55,56,57,58,59,60,61,62	-	30	29
CTTGAGGCCTTTCTTACCCAGAAGCAGAA	CTTGAGGCCTTTCTTACCCAGAAGCAGAA	var1463	29	0	0	33	-	-	30,31,32,33,34,35,36,37,38,39,40,41,42,43,44,45,46,47,48,49,50,51,52,53,54,55,56,57,58,59,60,61,62	-	30	29
CTTGAGGCCTTTCTTACCCAGAAGCAGAA	CTTGAGGCCTTTCTTACCCAGAAGCAGAA	var1464	29	0	0	33	-	-	30,31,32,33,34,35,36,37,38,39,40,41,42,43,44,45,46,47,48,49,50,51,52,53,54,55,56,57,58,59,60,61,62	-	30	29
CTTGAGGCCTTTCTTACCCAGAAGCAGAA	CTTGAGGCCTTTCTTACCCAGAAGCAGAA	var1504	29	0	0	33	-	-	30,31,32,33,34,35,36,37,38,39,40,41,42,43,44,45,46,47,48,49,50,51,52,53,54,55,56,57,58,59,60,61,62	-	30	29
CTTGAGGCCTTTCTTACCCAGAAGCAGAA	CTTGAGGCCTTTCTTACCCAGAAGCAGAA	var1584	29	0	0	33	-	-	30,31,32,33,34,35,36,37,38,39,40,41,42,43,44,45,46,47,48,49,50,51,52,53,54,55,56,57,58,59,60,61,62	-	30	29
CTTGAGGCCTTTCTTACCCAGAAGCAGAA	CTTGAGGCCTTTCTTACCCAGAAGCAGAA	var1616	29	0	0	33	-	-	30,31,32,33,34,35,36,37,38,39,40,41,42,43,44,45,46,47,48,49,50,51,52,53,54,55,56,57,58,59,60,61,62	-	30	29
CTTGAGGCCTTTCTTACCCAGAAGCAGAA	CTTGAGGCCTTTCTTACCCAGAAGCAGAA	var1661	29	0	0	33	-	-	30,31,32,33,34,35,36,37,38,39,40,41,42,43,44,45,46,47,48,49,50,51,52,53,54,55,56,57,58,59,60,61,62	-	30	29
CTTGAGGCCTTTCTTACCCAGAAGCAGAA	CTTGAGGCCTTTCTTACCCAGAAGCAGAA	var1663	29	0	0	33	-	-	30,31,32,33,34,35,36,37,38,39,40,41,42,43,44,45,46,47,48,49,50,51,52,53,54,55,56,57,58,59,60,61,62	-	30	29
CTTGAGGCCTTTCTTACCCAGAAGCAGAA	CTTGAGGCCTTTCTTACCCAGAAGCAGAA	var262	29	0	0	33	-	-	30,31,32,33,34,35,36,37,38,39,40,41,42,43,44,45,46,47,48,49,50,51,52,53,54,55,56,57,58,59,60,61,62	-	30	29
CTTGAGGCCTTTCTTACCCAGAAGCAGAA	CTTGAGGCCTTTCTTACCCAGAAGCAGAA	var561	29	0	0	33	-	-	30,31,32,33,34,35,36,37,38,39,40,41,42,43,44,45,46,47,48,49,50,51,52,53,54,55,56,57,58,59,60,61,62	-	30	29
CTTGAGGCCTTTCTTACCCAGAAGCAGAA	CTTGAGGCCTTTCTTACCCAGAAGCAGAA	var804	29	0	0	33	-	-	30,31,32,33,34,35,36,37,38,39,40,41,42,43,44,45,46,47,48,49,50,51,52,53,54,55,56,57,58,59,60,61,62	-	30	29
CTTGAGGCCTTTCTTACCCAGAAGCAGAA	CTTGAGGCCTTTCTTACCCAGAAGCAGAA	var977	29	0	0	33	-	-	30,31,32,33,34,35,36,37,38,39,40,41,42,43,44,45,46,47,48,49,50,51,52,53,54,55,56,57,58,59,60,61,62	-	30	29
CTTGAGGCCTTTCTTACCCAGAAGCAGAA----------CTGA----TGACGACTTTGAGAA	CTTGAGGCCTTTCTTACCCAGAAGCAGAAGGTGGGAGAACTGAAGGATGACGACTTTGAGAA	var1322	29-G-G-T-G-G-G-A-G-A-A4-A-G-G-A15	0	0	14	-	-	30,31,32,33,34,35,36,37,38,39,44,45,46,47		30	62
CTTGAGGCCTTTCTTACCCAGAAGCAGAA--------AACTGAAGGATGACGACTTTGAGAA	CTTGAGGCCTTTCTTACCCAGAAGCAGAAGGTGGGAGAACTGAAGGATGACGACTTTGAGAA	var1036	29-G-G-T-G-G-G-A-G25	0	0	8	-	-	30,31,32,33,34,35,36,37		30	62
CTTGAGGCCTTTCTTACCCAGAAGCAGAA------ACTTCTGAAGGATGACGACTTTGAGAA	CTTGAGGCCTTTCTTACCCAGAAGCAGAAGGTGGGAGAACTGAAGGATGACGACTTTGAGAA	var1168	29-G-G-T-G-G-G1CGTATA23	3	0	6	37,38,39	-	30,31,32,33,34,35		30	62
CTTGAGGCCTTTCTTACCCAGAAGCAGAA------AGAACTGA-----GAAGACTTTGAGAA	CTTGAGGCCTTTCTTACCCAGAAGCAGAAGGTGGGAGAACTGAAGGATGACGACTTTGAGAA	var609	29-G-G-T-G-G-G8-A-G-G-A-T2AC11	1	0	11	51	-	30,31,32,33,34,35,44,45,46,47,48		30	62
CTTGAGGCCTTTCTTACCCAGAAGCAGAA------AGAACTGAAGGATGACGACTTTGAGAA	CTTGAGGCCTTTCTTACCCAGAAGCAGAAGGTGGGAGAACTGAAGGATGACGACTTTGAGAA	var488	29-G-G-T-G-G-G27	0	0	6	-	-	30,31,32,33,34,35		30	62
CTTGAGGCCTTTCTTACCCAGAAGCAGAA-----CAGAACTGAAGGATGACGACTTTGAGAA	CTTGAGGCCTTTCTTACCCAGAAGCAGAAGGTGGGAGAACTGAAGGATGACGACTTTGAGAA	var688	29-G-G-T-G-GCG27	1	0	5	35	-	30,31,32,33,34		30	62
CTTGAGGCCTTTCTTACCCAGAAGCAGAA-----CTGAACTGAAGGATGA	CTTGAGGCCTTTCTTACCCAGAAGCAGAAGGTGGGAGAACTGAAGGATGA	var967	29-G-G-T-G-GCGTA14	2	0	5	35,36	-	30,31,32,33,34		30	50
CTTGAGGCCTTTCTTACCCAGAAGCAGAA-----CTGAACTGAAGGATGACGACTTTGAGAA	CTTGAGGCCTTTCTTACCCAGAAGCAGAAGGTGGGAGAACTGAAGGATGACGACTTTGAGAA	var107	29-G-G-T-G-GCGTA26	2	0	5	35,36	-	30,31,32,33,34		30	62
CTTGAGGCCTTTCTTACCCAGAAGCAGAA-----GAGAACTGAAGGATGACGACTTTGAGAA	CTTGAGGCCTTTCTTACCCAGAAGCAGAAGGTGGGAGAACTGAAGGATGACGACTTTGAGAA	var382	29-G-G-T-G-G28	0	0	5	-	-	30,31,32,33,34		30	62
CTTGAGGCCTTTCTTACCCAGAAGCAGAA----AGAGAACTGAAGGATGACGACTTTGAGAA	CTTGAGGCCTTTCTTACCCAGAAGCAGAAGGTGGGAGAACTGAAGGATGACGACTTTGAGAA	var608	29-G-G-T-GAG28	1	0	4	34	-	30,31,32,33		30	62
CTTGAGGCCTTTCTTACCCAGAAGCAGAA----GAAGAACTGAAGGATGACGACTTTGAGAA	CTTGAGGCCTTTCTTACCCAGAAGCAGAAGGTGGGAGAACTGAAGGATGACGACTTTGAGAA	var1484	29-G-G-T-G1AG27	1	0	4	35	-	30,31,32,33		30	62
CTTGAGGCCTTTCTTACCCAGAAGCAGAA----GGAGAACTGAAGGATGACGACTTTGAGAA	CTTGAGGCCTTTCTTACCCAGAAGCAGAAGGTGGGAGAACTGAAGGATGACGACTTTGAGAA	var225	29-G-G-T-G29	0	0	4	-	-	30,31,32,33		30	62
CTTGAGGCCTTTCTTACCCAGAAGCAGAA---CTGAGAACTGAAGGATGACGACTTTGAGAA	CTTGAGGCCTTTCTTACCCAGAAGCAGAAGGTGGGAGAACTGAAGGATGACGACTTTGAGAA	var1085	29-G-G-TCGTG28	2	0	3	33,34	-	30,31,32		30	62
CTTGAGGCCTTTCTTACCCAGAAGCAGAA---GGATGAACTGAAGGATGACGACTTTGAGAA	CTTGAGGCCTTTCTTACCCAGAAGCAGAAGGTGGGAGAACTGAAGGATGACGACTTTGAGAA	var1651	29-G-G-T2AGTA26	2	0	3	35,36	-	30,31,32		30	62
CTTGAGGCCTTTCTTACCCAGAAGCAGAA---GGGAGAACTGAAGGATGACGACTTTGAGAA	CTTGAGGCCTTTCTTACCCAGAAGCAGAAGGTGGGAGAACTGAAGGATGACGACTTTGAGAA	var502	29-G-G-T30	0	0	3	-	-	30,31,32		30	62
CTTGAGGCCTTTCTTACCCAGAAGCAGAA--AGAGAGAACTGAAGGATGACGACTTTGAGAA	CTTGAGGCCTTTCTTACCCAGAAGCAGAAGGTGGGAGAACTGAAGGATGACGACTTTGAGAA	var631	29-G-GAT1AG28	2	0	2	32,34	-	30,31		30	62
CTTGAGGCCTTTCTTACCCAGAAGCAGAA--CTGAAGAACTGAAGGATGACGACTTTGAGAA	CTTGAGGCCTTTCTTACCCAGAAGCAGAAGGTGGGAGAACTGAAGGATGACGACTTTGAGAA	var913	29-G-GCTTG1AG27	3	0	2	32,33,35	-	30,31		30	62
CTTGAGGCCTTTCTTACCCAGAAGCAGAA--CTGGAGAACTGAAGGATGACGACTTTGAGAA	CTTGAGGCCTTTCTTACCCAGAAGCAGAAGGTGGGAGAACTGAAGGATGACGACTTTGAGAA	var651	29-G-GCTTG29	2	0	2	32,33	-	30,31		30	62
CTTGAGGCCTTTCTTACCCAGAAGCAGAA--TGGGAGAACTGAAGGATGACGACTTTGAGAA	CTTGAGGCCTTTCTTACCCAGAAGCAGAAGGTGGGAGAACTGAAGGATGACGACTTTGAGAA	var425	29-G-G31	0	0	2	-	-	30,31		30	62
CTTGAGGCCTTTCTTACCCAGAAGCAGAA-CTG---GAACTGAAGGATGACGACTTTGAGAA	CTTGAGGCCTTTCTTACCCAGAAGCAGAAGGTGGGAGAACTGAAGGATGACGACTTTGAGAA	var1287	29-GCG2-G-G-A26	1	0	4	31	-	30,34,35,36		30	62
CTTGAGGCCTTTCTTACCCAGAAGCAGAA-CTGAAGGA--TGAAGGATGACGACTTTGAGAA	CTTGAGGCCTTTCTTACCCAGAAGCAGAAGGTGGGAGAACTGAAGGATGACGACTTTGAGAA	var1382	29-GCG2AGAGGA2-A-C22	4	0	3	31,34,35,36	-	30,39,40		30	62
CTTGAGGCCTTTCTTACCCAGAAGCAGAA-CTGGGTAAGAACTG	CTTGAGGCCTTTCTTACCCAGAAGCAGAAGGTGGG--AGAACTG	var511	29-GCG4T-A-7	1	2	0	31	36,37	-	36		44
CTTGAGGCCTTTCTTACCCAGAAGCAGAA-CTGGGTAAGAACTGAAGGATGACGACTTTGAGA	CTTGAGGCCTTTCTTACCCAGAAGCAGAAGGTGGG--AGAACTGAAGGATGACGACTTTGAGA	var1604	29-GCG4T-A-26	1	2	0	31	36,37	-	36		63
CTTGAGGCCTTTCTTACCCAGAAGCAGAA-CTTCTAGAACTGAAGGATGACGACTTTGAGAA	CTTGAGGCCTTTCTTACCCAGAAGCAGAAGGTGGGAGAACTGAAGGATGACGACTTTGAGAA	var1570	29-GCG1TGCGTG27	4	0	1	31,33,34,35	-	30		30	62
CTTGAGGCCTTTCTTACCCAGAAGCAGAAAAAAAACCCAGGTGGGAGAACTGAAGGATGACG	CTTGAGGCCTTTCTTACCCAGAAGCAGA----------AGGTGGGAGAACTGAAGGATGACG	var1245	28A-A-A-A-A-A-A-C-C-C-24	0	10	0	-	29,30,31,32,33,34,35,36,37,38	-	29		62
CTTGAGGCCTTTCTTACCCAGAAGCAGAAAAAAGTGGGAGAACTGAAGGATGACGACTTTGA	CTTGAGGCCTTTCTTACCCAGAAGCAGAAG---GTGGGAGAACTGAAGGATGACGACTTTGA	var1426	29AGA-A-A-29	1	3	0	30	31,32,33	-	31		62
CTTGAGGCCTTTCTTACCCAGAAGCAGAAAAAGGTGGGAGAACTGAAGGATGACGACTTTGA	CTTGAGGCCTTTCTTACCCAGAAGCAGAA---GGTGGGAGAACTGAAGGATGACGACTTTGA	var467	29A-A-A-30	0	3	0	-	30,31,32	-	30		62
CTTGAGGCCTTTCTTACCCAGAAGCAGAAAAGGTGGGAGAACTGAAGGATGACGACTTTGAG	CTTGAGGCCTTTCTTACCCAGAAGCAGAA--GGTGGGAGAACTGAAGGATGACGACTTTGAG	var48	29A-A-31	0	2	0	-	30,31	-	30		62
CTTGAGGCCTTTCTTACCCAGAAGCAGAAAAGTGGGAGAACTGAAGGATGACGACTTTGAGA	CTTGAGGCCTTTCTTACCCAGAAGCAGAAG-GTGGGAGAACTGAAGGATGACGACTTTGAGA	var629	29AGA-31	1	1	0	30	31	-	31		62
CTTGAGGCCTTTCTTACCCAGAAGCAGAAAATGGGAGAACTGAAGGATGACGACTTTGAGAA	CTTGAGGCCTTTCTTACCCAGAAGCAGAAGGTGGGAGAACTGAAGGATGACGACTTTGAGAA	var1625	29AGAG31	2	0	0	30,31	-	-			62
CTTGAGGCCTTTCTTACCCAGAAGCAGAAACTGAACTTTCTGCAGGTGGGAGAACTGAAGGA	CTTGAGGCCTTTCTTACCCAGAAGCAGA---------------AGGTGGGAGAACTGAAGGA	var576	28A-A-C-T-G-A-A-C-T-T-T-C-T-G-C-19	0	15	0	-	29,30,31,32,33,34,35,36,37,38,39,40,41,42,43	-	29		62
CTTGAGGCCTTTCTTACCCAGAAGCAGAAACTGAAGGTGGGAGAACTGAAGGATGACGACTT	CTTGAGGCCTTTCTTACCCAGAAGCAGAA------GGTGGGAGAACTGAAGGATGACGACTT	var1151	29A-C-T-G-A-A-27	0	6	0	-	30,31,32,33,34,35	-	30		62
CTTGAGGCCTTTCTTACCCAGAAGCAGAAACTGGGAGAACTGAAGGATGACGACTTTGAGAA	CTTGAGGCCTTTCTTACCCAGAAGCAGAAGGTGGGAGAACTGAAGGATGACGACTTTGAGAA	var920	29AGCG31	2	0	0	30,31	-	-			62
CTTGAGGCCTTTCTTACCCAGAAGCAGAAACTGGTGGGAGAACTGAAGGATGACGACTTTGA	CTTGAGGCCTTTCTTACCCAGAAGCAGAA---GGTGGGAGAACTGAAGGATGACGACTTTGA	var1076	29A-C-T-30	0	3	0	-	30,31,32	-	30		62
CTTGAGGCCTTTCTTACCCAGAAGCAGAAACTTCTTCAACTGAAGGATGACGACTTTGAGAA	CTTGAGGCCTTTCTTACCCAGAAGCAGAAGGTGGGAGAACTGAAGGATGACGACTTTGAGAA	var968	29AGCG1TGCGTGTACG25	7	0	0	30,31,33,34,35,36,37	-	-			62
CTTGAGGCCTTTCTTACCCAGAAGCAGAAACTTCTTCTGCAGGTGGGAGAACTGAAGGATGA	CTTGAGGCCTTTCTTACCCAGAAGCAGA------------AGGTGGGAGAACTGAAGGATGA	var1288	28A-A-C-T-T-C-T-T-C-T-G-C-22	0	12	0	-	29,30,31,32,33,34,35,36,37,38,39,40	-	29		62
CTTGAGGCCTTTCTTACCCAGAAGCAGAAAG-----GAACTGAAGGATGACGACTTTGAGAA	CTTGAGGCCTTTCTTACCCAGAAGCAGAAGGTGGGAGAACTGAAGGATGACGACTTTGAGAA	var905	29AG1-T-G-G-G-A26	1	0	5	30	-	32,33,34,35,36		32	62
CTTGAGGCCTTTCTTACCCAGAAGCAGAAAGAAAAGTGGGAGAACTGAAGGATGACGACTTT	CTTGAGGCCTTTCTTACCCAGAAGCAG-----AAGGTGGGAGAACTGAAGGATGACGACTTT	var1361	27A-A-A-G-A-2AG27	1	5	0	35	28,29,30,31,32	-	28		62
CTTGAGGCCTTTCTTACCCAGAAGCAGAAAGAAAGGTGGGAGAACTGAAGGATGACGACTTT	CTTGAGGCCTTTCTTACCCAGAAGCAGAA-----GGTGGGAGAACTGAAGGATGACGACTTT	var1135	29A-G-A-A-A-28	0	5	0	-	30,31,32,33,34	-	30		62
CTTGAGGCCTTTCTTACCCAGAAGCAGAAAGAAGCAGGTGGGAGAACTGAAGGATGACGACT	CTTGAGGCCTTTCTTACCCAGAAGCAGA-------AGGTGGGAGAACTGAAGGATGACGACT	var1063	28A-A-G-A-A-G-C-27	0	7	0	-	29,30,31,32,33,34,35	-	29		62
CTTGAGGCCTTTCTTACCCAGAAGCAGAAAGAAGGTGGGAGAACTGAAGGATGACGACTTTG	CTTGAGGCCTTTCTTACCCAGAAGCAGAA----GGTGGGAGAACTGAAGGATGACGACTTTG	var198	29A-G-A-A-29	0	4	0	-	30,31,32,33	-	30		62
CTTGAGGCCTTTCTTACCCAGAAGCAGAAAGATGGGAGAACTGAAGGATGACGACTTTGAGA	CTTGAGGCCTTTCTTACCCAGAAGCAGAAGG-TGGGAGAACTGAAGGATGACGACTTTGAGA	var486	29AG1A-30	1	1	0	30	32	-	32		62
CTTGAGGCCTTTCTTACCCAGAAGCAGAAAGCAGGTGGGAGAACTGAAGGATGACGACTTTG	CTTGAGGCCTTTCTTACCCAGAAGCAGAA----GGTGGGAGAACTGAAGGATGACGACTTTG	var1628	29A-G-C-A-29	0	4	0	-	30,31,32,33	-	30		62
CTTGAGGCCTTTCTTACCCAGAAGCAGAAAGCCTCCAAGAGAACTGAAGGATGACGACTTTG	CTTGAGGCCTTTCTTACCCAGAAGCAGAAGG----TGGGAGAACTGAAGGATGACGACTTTG	var1167	29AG1C-C-T-C-CTAGAG24	4	4	0	30,36,37,38	32,33,34,35	-	32		62
CTTGAGGCCTTTCTTACCCAGAAGCAGAAAGGAGGGAGAACTGAAGGATGACGACATTGAGA	CTTGAGGCCTTTCTTACCCAGAAGCAG-AAGGTGGGAGAACTGAAGGATGACGACTTTGAGA	var1261	27A-4AT22AT6	2	1	0	33,56	28	-	28		62
CTTGAGGCCTTTCTTACCCAGAAGCAGAAAGGAGGGAGAACTGAAGGATGACGACTTTGAGA	CTTGAGGCCTTTCTTACCCAGAAGCAGAA-GGTGGGAGAACTGAAGGATGACGACTTTGAGA	var37	29A-2AT29	1	1	0	33	30	-	30		62
CTTGAGGCCTTTCTTACCCAGAAGCAGAAAGGCGGGAGAACTGAAGGATGACGACTTTGAGA	CTTGAGGCCTTTCTTACCCAGAAGCAGAA-GGTGGGAGAACTGAAGGATGACGACTTTGAGA	var86	29A-2CT29	1	1	0	33	30	-	30		62
CTTGAGGCCTTTCTTACCCAGAAGCAGAAAGGGGGGAGAACTGAAGGATGACGACTTTGAGA	CTTGAGGCCTTTCTTACCCAGAAGCAGAA-GGTGGGAGAACTGAAGGATGACGACTTTGAGA	var85	29A-2GT29	1	1	0	33	30	-	30		62
CTTGAGGCCTTTCTTACCCAGAAGCAGAAAGGTAGGAGAACTGAAGGATGACGACTTTGAGA	CTTGAGGCCTTTCTTACCCAGAAGCAGAA-GGTGGGAGAACTGAAGGATGACGACTTTGAGA	var639	29A-3AG28	1	1	0	34	30	-	30		62
CTTGAGGCCTTTCTTACCCAGAAGCAGAAAGGTGAGAGAACTGAAGGATGACGACTTTGAGA	CTTGAGGCCTTTCTTACCCAGAAGCAGAA-GGTGGGAGAACTGAAGGATGACGACTTTGAGA	var520	29A-4AG27	1	1	0	35	30	-	30		62
CTTGAGGCCTTTCTTACCCAGAAGCAGAAAGGTGGAAGAACTGAAGGATGACGACTTTGAGA	CTTGAGGCCTTTCTTACCCAGAAGCAGAA-GGTGGGAGAACTGAAGGATGACGACTTTGAGA	var740	29A-5AG26	1	1	0	36	30	-	30		62
CTTGAGGCCTTTCTTACCCAGAAGCAGAAAGGTGGAGAACTGAAGGATGACGACTTTGAGAA	CTTGAGGCCTTTCTTACCCAGAAGCAGAAGGTGGGAGAACTGAAGGATGACGACTTTGAGAA	var749	29AG1GTTG29	3	0	0	30,32,33	-	-			62
CTTGAGGCCTTTCTTACCCAGAAGCAGAAAGGTGGGAAAACTGAAGGATGACGACTTTGAGA	CTTGAGGCCTTTCTTACCCAGAAGCAGAA-GGTGGGAGAACTGAAGGATGACGACTTTGAGA	var582	29A-7AG24	1	1	0	38	30	-	30		62
CTTGAGGCCTTTCTTACCCAGAAGCAGAAAGGTGGGAGAAATGAAGGATGACGACTTTGAGA	CTTGAGGCCTTTCTTACCCAGAAGCAGAA-GGTGGGAGAACTGAAGGATGACGACTTTGAGA	var1108	29A-10AC21	1	1	0	41	30	-	30		62
CTTGAGGCCTTTCTTACCCAGAAGCAGAAAGGTGGGAGAACAGAAGGATGACGACTTTGAGA	CTTGAGGCCTTTCTTACCCAGAAGCAGAA-GGTGGGAGAACTGAAGGATGACGACTTTGAGA	var1030	29A-11AT20	1	1	0	42	30	-	30		62
CTTGAGGCCTTTCTTACCCAGAAGCAGAAAGGTGGGAGAACCGAAGGATGACGACTTTGAGA	CTTGAGGCCTTTCTTACCCAGAAGCAGAA-GGTGGGAGAACTGAAGGATGACGACTTTGAGA	var324	29A-11CT20	1	1	0	42	30	-	30		62
CTTGAGGCCTTTCTTACCCAGAAGCAGAAAGGTGGGAGAACTAAAGGATGACGACTTTGAGA	CTTGAGGCCTTTCTTACCCAGAAGCAGAA-GGTGGGAGAACTGAAGGATGACGACTTTGAGA	var184	29A-12AG19	1	1	0	43	30	-	30		62
CTTGAGGCCTTTCTTACCCAGAAGCAGAAAGGTGGGAGAACTGAAAGATGACGACTTTGAGA	CTTGAGGCCTTTCTTACCCAGAAGCAGAA-GGTGGGAGAACTGAAGGATGACGACTTTGAGA	var854	29A-15AG16	1	1	0	46	30	-	30		62
CTTGAGGCCTTTCTTACCCAGAAGCAGAAAGGTGGGAGAACTGAAGAATGACGACTTTGAGA	CTTGAGGCCTTTCTTACCCAGAAGCAGAA-GGTGGGAGAACTGAAGGATGACGACTTTGAGA	var622	29A-16AG15	1	1	0	47	30	-	30		62
CTTGAGGCCTTTCTTACCCAGAAGCAGAAAGGTGGGAGAACTGAAGGAAGACGACTTTGAGA	CTTGAGGCCTTTCTTACCCAGAAGCAGAA-GGTGGGAGAACTGAAGGATGACGACTTTGAGA	var976	29A-18AT13	1	1	0	49	30	-	30		62
CTTGAGGCCTTTCTTACCCAGAAGCAGAAAGGTGGGAGAACTGAAGGACGACGACTTTGAGA	CTTGAGGCCTTTCTTACCCAGAAGCAGAA-GGTGGGAGAACTGAAGGATGACGACTTTGAGA	var260	29A-18CT13	1	1	0	49	30	-	30		62
CTTGAGGCCTTTCTTACCCAGAAGCAGAAAGGTGGGAGAACTGAAGGATAACGACTTTGAGA	CTTGAGGCCTTTCTTACCCAGAAGCAGAA-GGTGGGAGAACTGAAGGATGACGACTTTGAGA	var462	29A-19AG12	1	1	0	50	30	-	30		62
CTTGAGGCCTTTCTTACCCAGAAGCAGAAAGGTGGGAGAACTGAAGGATGAAGACTTTGAGA	CTTGAGGCCTTTCTTACCCAGAAGCAGAA-GGTGGGAGAACTGAAGGATGACGACTTTGAGA	var603	29A-21AC10	1	1	0	52	30	-	30		62
CTTGAGGCCTTTCTTACCCAGAAGCAGAAAGGTGGGAGAACTGAAGGATGACAACTTTGAGA	CTTGAGGCCTTTCTTACCCAGAAGCAGAA-GGTGGGAGAACTGAAGGATGACGACTTTGAGA	var514	29A-22AG9	1	1	0	53	30	-	30		62
CTTGAGGCCTTTCTTACCCAGAAGCAGAAAGGTGGGAGAACTGAAGGATGACGA	CTTGAGGCCTTTCTTACCCAGAAGCAG-AAGGTGGGAGAACTGAAGGATGACGA	var1428	27A-26	0	1	0	-	28	-	28		54
CTTGAGGCCTTTCTTACCCAGAAGCAGAAAGGTGGGAGAACTGAAGGATGACGAATTTGAGA	CTTGAGGCCTTTCTTACCCAGAAGCAGAA-GGTGGGAGAACTGAAGGATGACGACTTTGAGA	var301	29A-24AC7	1	1	0	55	30	-	30		62
CTTGAGGCCTTTCTTACCCAGAAGCAGAAAGGTGGGAGAACTGAAGGATGACGAC-TTGAGAA	CTTGAGGCCTTTCTTACCCAGAAGCAG-AAGGTGGGAGAACTGAAGGATGACGACTTTGAGAA	var256	27A-27-T7	0	1	0	-	28	-	28		63
CTTGAGGCCTTTCTTACCCAGAAGCAGAAAGGTGGGAGAACTGAAGGATGACGACATTGAGA	CTTGAGGCCTTTCTTACCCAGAAGCAGAA-GGTGGGAGAACTGAAGGATGACGACTTTGAGA	var732	29A-25AT6	1	1	0	56	30	-	30		62
CTTGAGGCCTTTCTTACCCAGAAGCAGAAAGGTGGGAGAACTGAAGGATGACGACCTTGAGA	CTTGAGGCCTTTCTTACCCAGAAGCAGAA-GGTGGGAGAACTGAAGGATGACGACTTTGAGA	var636	29A-25CT6	1	1	0	56	30	-	30		62
CTTGAGGCCTTTCTTACCCAGAAGCAGAAAGGTGGGAGAACTGAAGGATGACGACGTTGAGA	CTTGAGGCCTTTCTTACCCAGAAGCAGAA-GGTGGGAGAACTGAAGGATGACGACTTTGAGA	var1637	29A-25GT6	1	1	0	56	30	-	30		62
CTTGAGGCCTTTCTTACCCAGAAGCAGAAAGGTGGGAGAACTGAAGGATGACGACTATGAGA	CTTGAGGCCTTTCTTACCCAGAAGCAGAA-GGTGGGAGAACTGAAGGATGACGACTTTGAGA	var1409	29A-26AT5	1	1	0	57	30	-	30		62
CTTGAGGCCTTTCTTACCCAGAAGCAGAAAGGTGGGAGAACTGAAGGATGACGACTTAGAGA	CTTGAGGCCTTTCTTACCCAGAAGCAGAA-GGTGGGAGAACTGAAGGATGACGACTTTGAGA	var1513	29A-27AT4	1	1	0	58	30	-	30		62
CTTGAGGCCTTTCTTACCCAGAAGCAGAAAGGTGGGAGAACTGAAGGATGACGACTTT-AGAA	CTTGAGGCCTTTCTTACCCAGAAGCAGAA-GGTGGGAGAACTGAAGGATGACGACTTTGAGAA	var1112	29A-28-G4	0	1	0	-	30	-	30		63
CTTGAGGCCTTTCTTACCCAGAAGCAGAAAGGTGGGAGAACTGAAGGATGACGACTTTAAGA	CTTGAGGCCTTTCTTACCCAGAAGCAGAA-GGTGGGAGAACTGAAGGATGACGACTTTGAGA	var563	29A-28AG3	1	1	0	59	30	-	30		62
CTTGAGGCCTTTCTTACCCAGAAGCAGAAAGGTGGGAGAACTGAAGGATGACGACTTTG	CTTGAGGCCTTTCTTACCCAGAAGCAGAA-GGTGGGAGAACTGAAGGATGACGACTTTG	var521	29A-29	0	1	0	-	30	-	30		59
CTTGAGGCCTTTCTTACCCAGAAGCAGAAAGGTGGGAGAACTGAAGGATGACGACTTTGA	CTTGAGGCCTTTCTTACCCAGAAGCAGAA-GGTGGGAGAACTGAAGGATGACGACTTTGA	var140	29A-30	0	1	0	-	30	-	30		60
CTTGAGGCCTTTCTTACCCAGAAGCAGAAAGGTGGGAGAACTGAAGGATGACGACTTTGAG	CTTGAGGCCTTTCTTACCCAGAAGCAGAA-GGTGGGAGAACTGAAGGATGACGACTTTGAG	var793	29A-31	0	1	0	-	30	-	30		61
CTTGAGGCCTTTCTTACCCAGAAGCAGAAAGGTGGGAGAACTGAAGGATGACGACTTTGAG	CTTGAGGCCTTTCTTACCCAGAAGCAGAA-GGTGGGAGAACTGAAGGATGACGACTTTGAG	var893	29A-31	0	1	0	-	30	-	30		61
CTTGAGGCCTTTCTTACCCAGAAGCAGAAAGGTGGGAGAACTGAAGGATGACGACTTTGAGA	CTTGAGGCCTTTCTTACCCAGAAGCAGAA-GGTGGGAGAACTGAAGGATGACGACTTTGAGA	var2	29A-32	0	1	0	-	30	-	30		62
CTTGAGGCCTTTCTTACCCAGAAGCAGAAAGGTGGGAGAACTGAAGGATGACGACTTTGGGA	CTTGAGGCCTTTCTTACCCAGAAGCAGAA-GGTGGGAGAACTGAAGGATGACGACTTTGAGA	var997	29A-29GA2	1	1	0	60	30	-	30		62
CTTGAGGCCTTTCTTACCCAGAAGCAGAAAGGTGGGAGAACTGAAGGATGACGATTTTGAGA	CTTGAGGCCTTTCTTACCCAGAAGCAGAA-GGTGGGAGAACTGAAGGATGACGACTTTGAGA	var602	29A-24TC7	1	1	0	55	30	-	30		62
CTTGAGGCCTTTCTTACCCAGAAGCAGAAAGGTGGGAGAACTGAAGGATGACGCCTTTGAGA	CTTGAGGCCTTTCTTACCCAGAAGCAGAA-GGTGGGAGAACTGAAGGATGACGACTTTGAGA	var415	29A-23CA8	1	1	0	54	30	-	30		62
CTTGAGGCCTTTCTTACCCAGAAGCAGAAAGGTGGGAGAACTGAAGGATGATGACTTTGAGA	CTTGAGGCCTTTCTTACCCAGAAGCAGAA-GGTGGGAGAACTGAAGGATGACGACTTTGAGA	var638	29A-21TC10	1	1	0	52	30	-	30		62
CTTGAGGCCTTTCTTACCCAGAAGCAGAAAGGTGGGAGAACTGAAGGATGCCGACTTTGAGA	CTTGAGGCCTTTCTTACCCAGAAGCAGAA-GGTGGGAGAACTGAAGGATGACGACTTTGAGA	var1027	29A-20CA11	1	1	0	51	30	-	30		62
CTTGAGGCCTTTCTTACCCAGAAGCAGAAAGGTGGGAGAACTGAAGGATGGCGACTTTGAGA	CTTGAGGCCTTTCTTACCCAGAAGCAGAA-GGTGGGAGAACTGAAGGATGACGACTTTGAGA	var299	29A-20GA11	1	1	0	51	30	-	30		62
CTTGAGGCCTTTCTTACCCAGAAGCAGAAAGGTGGGAGAACTGAAGGATGTCGACTTTGAGA	CTTGAGGCCTTTCTTACCCAGAAGCAGAA-GGTGGGAGAACTGAAGGATGACGACTTTGAGA	var1010	29A-20TA11	1	1	0	51	30	-	30		62
CTTGAGGCCTTTCTTACCCAGAAGCAGAAAGGTGGGAGAACTGAAGGATTACGACTTTGAGA	CTTGAGGCCTTTCTTACCCAGAAGCAGAA-GGTGGGAGAACTGAAGGATGACGACTTTGAGA	var626	29A-19TG12	1	1	0	50	30	-	30		62
CTTGAGGCCTTTCTTACCCAGAAGCAGAAAGGTGGGAGAACTGAAGGCTGACGACTTTGAGA	CTTGAGGCCTTTCTTACCCAGAAGCAGAA-GGTGGGAGAACTGAAGGATGACGACTTTGAGA	var878	29A-17CA14	1	1	0	48	30	-	30		62
CTTGAGGCCTTTCTTACCCAGAAGCAGAAAGGTGGGAGAACTGAAGGGTGACGACTTTGAGA	CTTGAGGCCTTTCTTACCCAGAAGCAGAA-GGTGGGAGAACTGAAGGATGACGACTTTGAGA	var375	29A-17GA14	1	1	0	48	30	-	30		62
CTTGAGGCCTTTCTTACCCAGAAGCAGAAAGGTGGGAGAACTGAAGGTTGACGACTTTGAGA	CTTGAGGCCTTTCTTACCCAGAAGCAGAA-GGTGGGAGAACTGAAGGATGACGACTTTGAGA	var1518	29A-17TA14	1	1	0	48	30	-	30		62
CTTGAGGCCTTTCTTACCCAGAAGCAGAAAGGTGGGAGAACTGAAGTATGACGACTTTGAGA	CTTGAGGCCTTTCTTACCCAGAAGCAGAA-GGTGGGAGAACTGAAGGATGACGACTTTGAGA	var1439	29A-16TG15	1	1	0	47	30	-	30		62
CTTGAGGCCTTTCTTACCCAGAAGCAGAAAGGTGGGAGAACTGACGGATGACGACTTTGAGA	CTTGAGGCCTTTCTTACCCAGAAGCAGAA-GGTGGGAGAACTGAAGGATGACGACTTTGAGA	var566	29A-14CA17	1	1	0	45	30	-	30		62
CTTGAGGCCTTTCTTACCCAGAAGCAGAAAGGTGGGAGAACTGAGGGATGACGACTTTGAGA	CTTGAGGCCTTTCTTACCCAGAAGCAGAA-GGTGGGAGAACTGAAGGATGACGACTTTGAGA	var232	29A-14GA17	1	1	0	45	30	-	30		62
CTTGAGGCCTTTCTTACCCAGAAGCAGAAAGGTGGGAGAACTGCAGGATGACGACTTTGAGA	CTTGAGGCCTTTCTTACCCAGAAGCAGAA-GGTGGGAGAACTGAAGGATGACGACTTTGAGA	var971	29A-13CA18	1	1	0	44	30	-	30		62
CTTGAGGCCTTTCTTACCCAGAAGCAGAAAGGTGGGAGAACTGGAGGATGACGACTTTGAGA	CTTGAGGCCTTTCTTACCCAGAAGCAGAA-GGTGGGAGAACTGAAGGATGACGACTTTGAGA	var400	29A-13GA18	1	1	0	44	30	-	30		62
CTTGAGGCCTTTCTTACCCAGAAGCAGAAAGGTGGGAGAACTGTAGGATGACGACTTTGAGA	CTTGAGGCCTTTCTTACCCAGAAGCAGAA-GGTGGGAGAACTGAAGGATGACGACTTTGAGA	var1251	29A-13TA18	1	1	0	44	30	-	30		62
CTTGAGGCCTTTCTTACCCAGAAGCAGAAAGGTGGGAGAATTGAAGGATGACGACTTTGAGA	CTTGAGGCCTTTCTTACCCAGAAGCAGAA-GGTGGGAGAACTGAAGGATGACGACTTTGAGA	var1029	29A-10TC21	1	1	0	41	30	-	30		62
CTTGAGGCCTTTCTTACCCAGAAGCAGAAAGGTGGGAGACCTGAAGGATGACGACTTTGAGA	CTTGAGGCCTTTCTTACCCAGAAGCAGAA-GGTGGGAGAACTGAAGGATGACGACTTTGAGA	var959	29A-9CA22	1	1	0	40	30	-	30		62
CTTGAGGCCTTTCTTACCCAGAAGCAGAAAGGTGGGAGAGCTGAAGGATGACGACTTTGAGA	CTTGAGGCCTTTCTTACCCAGAAGCAGAA-GGTGGGAGAACTGAAGGATGACGACTTTGAGA	var330	29A-9GA22	1	1	0	40	30	-	30		62
CTTGAGGCCTTTCTTACCCAGAAGCAGAAAGGTGGGAGCACTGAAGGATGACGACTTTGAGA	CTTGAGGCCTTTCTTACCCAGAAGCAGAA-GGTGGGAGAACTGAAGGATGACGACTTTGAGA	var303	29A-8CA23	1	1	0	39	30	-	30		62
CTTGAGGCCTTTCTTACCCAGAAGCAGAAAGGTGGGAGGACTGAAGGATGACGACTTTGAGA	CTTGAGGCCTTTCTTACCCAGAAGCAGAA-GGTGGGAGAACTGAAGGATGACGACTTTGAGA	var326	29A-8GA23	1	1	0	39	30	-	30		62
CTTGAGGCCTTTCTTACCCAGAAGCAGAAAGGTGGGATAACTGAAGGATGACGACTTTGAGA	CTTGAGGCCTTTCTTACCCAGAAGCAGAA-GGTGGGAGAACTGAAGGATGACGACTTTGAGA	var1174	29A-7TG24	1	1	0	38	30	-	30		62
CTTGAGGCCTTTCTTACCCAGAAGCAGAAAGGTGGGCGAACTGAAGGATGACGACTTTGAGA	CTTGAGGCCTTTCTTACCCAGAAGCAGAA-GGTGGGAGAACTGAAGGATGACGACTTTGAGA	var703	29A-6CA25	1	1	0	37	30	-	30		62
CTTGAGGCCTTTCTTACCCAGAAGCAGAAAGGTGGGGGAACTGAAGGATGACGACTTTGAGA	CTTGAGGCCTTTCTTACCCAGAAGCAGAA-GGTGGGAGAACTGAAGGATGACGACTTTGAGA	var228	29A-6GA25	1	1	0	37	30	-	30		62
CTTGAGGCCTTTCTTACCCAGAAGCAGAAAGGTGGGTGAACTGAAGGATGACGACTTTGAGA	CTTGAGGCCTTTCTTACCCAGAAGCAGAA-GGTGGGAGAACTGAAGGATGACGACTTTGAGA	var1028	29A-6TA25	1	1	0	37	30	-	30		62
CTTGAGGCCTTTCTTACCCAGAAGCAGAAAGGTGTGAGAACTGAAGGATGACGACTTTGAGA	CTTGAGGCCTTTCTTACCCAGAAGCAGAA-GGTGGGAGAACTGAAGGATGACGACTTTGAGA	var1176	29A-4TG27	1	1	0	35	30	-	30		62
CTTGAGGCCTTTCTTACCCAGAAGCAGAAAGGTTGGAGAACTGAAGGATGACGACTTTGAGA	CTTGAGGCCTTTCTTACCCAGAAGCAGAA-GGTGGGAGAACTGAAGGATGACGACTTTGAGA	var1378	29A-3TG28	1	1	0	34	30	-	30		62
CTTGAGGCCTTTCTTACCCAGAAGCAGAAAGTGGGAGAACTGAAGGATGACGACTTTGAGAA	CTTGAGGCCTTTCTTACCCAGAAGCAGAAGGTGGGAGAACTGAAGGATGACGACTTTGAGAA	var122	29AG32	1	0	0	30	-	-			62
CTTGAGGCCTTTCTTACCCAGAAGCAGAAAGTTCAGGTGGGAGAACTGAAGGATGACGACTT	CTTGAGGCCTTTCTTACCCAGAAGCAGA------AGGTGGGAGAACTGAAGGATGACGACTT	var619	28A-A-G-T-T-C-28	0	6	0	-	29,30,31,32,33,34	-	29		62
CTTGAGGCCTTTCTTACCCAGAAGCAGAAAGTTGGGAGAACTGAAGGATGACGACTTTGAGA	CTTGAGGCCTTTCTTACCCAGAAGCAGAAGGT-GGGAGAACTGAAGGATGACGACTTTGAGA	var857	29AG2T-29	1	1	0	30	33	-	33		62
CTTGAGGCCTTTCTTACCCAGAAGCAGAAATGGTGGTGGGAGAACTGAAGGATGACGACTTT	CTTGAGGCCTTTCTTACCCAGAAGCAGAA-----GGTGGGAGAACTGAAGGATGACGACTTT	var1462	29A-T-G-G-T-28	0	5	0	-	30,31,32,33,34	-	30		62
CTTGAGGCCTTTCTTACCCAGAAGCAGAAATGTGGGAGAACTGAAGGATGACGACTTTGAGA	CTTGAGGCCTTTCTTACCCAGAAGCAGAAG-GTGGGAGAACTGAAGGATGACGACTTTGAGA	var770	29AGT-31	1	1	0	30	31	-	31		62
CTTGAGGCCTTTCTTACCCAGAAGCAGAAC-TGGGAGAACTGAAGGATGACGACTTTGAGAA	CTTGAGGCCTTTCTTACCCAGAAGCAGAAGGTGGGAGAACTGAAGGATGACGACTTTGAGAA	var132	29CG-G31	1	0	1	30	-	31		31	62
CTTGAGGCCTTTCTTACCCAGAAGCAGAACACATGGGAGAACTGAAGGATGACGACTTTGAG	CTTGAGGCCTTTCTTACCCAGAAGCAGA--AGGTGGGAGAACTGAAGGATGACGACTTTGAG	var1620	28A-C-1CGAG29	2	2	0	32,33	29,30	-	29		62
CTTGAGGCCTTTCTTACCCAGAAGCAGAACAGGTGGGAGAACTGAAGGATGACGACTTTGAG	CTTGAGGCCTTTCTTACCCAGAAGCAGAA--GGTGGGAGAACTGAAGGATGACGACTTTGAG	var679	29C-A-31	0	2	0	-	30,31	-	30		62
CTTGAGGCCTTTCTTACCCAGAAGCAGAACCAGGTGGGAGAACTGAAGGATGACGACTTTGA	CTTGAGGCCTTTCTTACCCAGAAGCAGAA---GGTGGGAGAACTGAAGGATGACGACTTTGA	var858	29C-C-A-30	0	3	0	-	30,31,32	-	30		62
CTTGAGGCCTTTCTTACCCAGAAGCAGAACCCAGAAGGTGGGAGAACTGAAGGATGACGACT	CTTGAGGCCTTTCTTACCCAGAAGCAGA-------AGGTGGGAGAACTGAAGGATGACGACT	var646	28A-C-C-C-A-G-A-27	0	7	0	-	29,30,31,32,33,34,35	-	29		62
CTTGAGGCCTTTCTTACCCAGAAGCAGAACCCAGGGAGAACTGAAGGATGACGACTTTGAGA	CTTGAGGCCTTTCTTACCCAGAAGCAGAA-GGTGGGAGAACTGAAGGATGACGACTTTGAGA	var940	29C-CGCGAT29	3	1	0	31,32,33	30	-	30		62
CTTGAGGCCTTTCTTACCCAGAAGCAGAACCCAGGTGGGAGAACTGAAGGATGACGACTTTG	CTTGAGGCCTTTCTTACCCAGAAGCAGAA----GGTGGGAGAACTGAAGGATGACGACTTTG	var146	29C-C-C-A-29	0	4	0	-	30,31,32,33	-	30		62
CTTGAGGCCTTTCTTACCCAGAAGCAGAACGGCGGGAGAACTGAAGGATGACGACTTTGAGA	CTTGAGGCCTTTCTTACCCAGAAGCAGAA-GGTGGGAGAACTGAAGGATGACGACTTTGAGA	var1525	29C-2CT29	1	1	0	33	30	-	30		62
CTTGAGGCCTTTCTTACCCAGAAGCAGAACGGTGGGAGAACTGAAGGATGACGACTTTGAGA	CTTGAGGCCTTTCTTACCCAGAAGCAGAA-GGTGGGAGAACTGAAGGATGACGACTTTGAGA	var331	29C-32	0	1	0	-	30	-	30		62
CTTGAGGCCTTTCTTACCCAGAAGCAGAACGTGGGAGAACTGAAGGATGACGACTTTGAGAA	CTTGAGGCCTTTCTTACCCAGAAGCAGAAGGTGGGAGAACTGAAGGATGACGACTTTGAGAA	var1553	29CG32	1	0	0	30	-	-			62
CTTGAGGCCTTTCTTACCCAGAAGCAGAACTAGCAGGTGGGAGAACTGAAGGATGACGACTT	CTTGAGGCCTTTCTTACCCAGAAGCAGAA------GGTGGGAGAACTGAAGGATGACGACTT	var1075	29C-T-A-G-C-A-27	0	6	0	-	30,31,32,33,34,35	-	30		62
CTTGAGGCCTTTCTTACCCAGAAGCAGAACTGAACTGAAGGGAGAACTGAAGGATGACGACT	CTTGAGGCCTTTCTTACCCAGAAGCAGAA-------GGTGGGAGAACTGAAGGATGACGACT	var841	29C-T-G-A-A-C-T-1AGAT23	2	7	0	38,39	30,31,32,33,34,35,36	-	30		62
CTTGAGGCCTTTCTTACCCAGAAGCAGAACTGAAGAAGGTGGGAGAACTGAAGGATGACGAC	CTTGAGGCCTTTCTTACCCAGAAGC--------AGAAGGTGGGAGAACTGAAGGATGACGAC	var1664	25A-G-A-A-C-T-G-A-29	0	8	0	-	26,27,28,29,30,31,32,33	-	26		62
CTTGAGGCCTTTCTTACCCAGAAGCAGAACTGAAGAGAACTGAAGGATGACGACTTTGAGAA	CTTGAGGCCTTTCTTACCCAGAAGCAGAAGGTGGGAGAACTGAAGGATGACGACTTTGAGAA	var937	29CGTGGTAGAG28	5	0	0	30,31,32,33,34	-	-			62
CTTGAGGCCTTTCTTACCCAGAAGCAGAACTGAAGATGACGAGAGAACTGAAGGATGACGAC	CTTGAGGCCTTTCTTACCCAGAAGCAGAA--------GGTGGGAGAACTGAAGGATGACGAC	var1244	29C-T-G-A-A-G-A-T-1AGCT1AG20	3	8	0	39,40,42	30,31,32,33,34,35,36,37	-	30		62
CTTGAGGCCTTTCTTACCCAGAAGCAGAACTGAAGATGGGAGAACTGAAGGATGACGACTTT	CTTGAGGCCTTTCTTACCCAGAAGCA-----GAAGGTGGGAGAACTGAAGGATGACGACTTT	var213	26G-A-A-C-T-4AG26	1	5	0	36	27,28,29,30,31	-	27		62
CTTGAGGCCTTTCTTACCCAGAAGCAGAACTGAAGCAGAACTGAAGGATGACGACTTTGAGA	CTTGAGGCCTTTCTTACCCAGAAGCAGAA-GGTGGGAGAACTGAAGGATGACGACTTTGAGA	var525	29C-TG1ATAG1CG26	4	1	0	31,33,34,36	30	-	30		62
CTTGAGGCCTTTCTTACCCAGAAGCAGAACTGAAGCAGGTGGGAGAACTGAAGGATGACGAC	CTTGAGGCCTTTCTTACCCAGAAGCAGA--------AGGTGGGAGAACTGAAGGATGACGAC	var535	28A-C-T-G-A-A-G-C-26	0	8	0	-	29,30,31,32,33,34,35,36	-	29		62
CTTGAGGCCTTTCTTACCCAGAAGCAGAACTGAAGGAGAACTGAAGGATGACGACTTTGAGA	CTTGAGGCCTTTCTTACCCAGAAGCAGAA-GGTGGGAGAACTGAAGGATGACGACTTTGAGA	var161	29C-TG1ATAG28	3	1	0	31,33,34	30	-	30		62
CTTGAGGCCTTTCTTACCCAGAAGCAGAACTGAAGGATGAACTGAAGG	CTTGAGGCCTTTCTTACCCAGAAGCAGAA--GGTGGGAGAACTGAAGG	var1387	29C-T-1AGAT2AGTA10	4	2	0	33,34,37,38	30,31	-	30		48
CTTGAGGCCTTTCTTACCCAGAAGCAGAACTGAAGGATGAACTGAAGGATGACGACTTTGAG	CTTGAGGCCTTTCTTACCCAGAAGCAGAA--GGTGGGAGAACTGAAGGATGACGACTTTGAG	var614	29C-T-1AGAT2AGTA24	4	2	0	33,34,37,38	30,31	-	30		62
CTTGAGGCCTTTCTTACCCAGAAGCAGAACTGAAGGATGACGAGAACTGAAGGATG	CTTGAGGCCTTTCTTACCCAGAAGCAGAA------GGTG-GGAGAACTGAAGGATG	var398	29C-T-G-A-A-G-1AG2A-CG15	2	7	0	37,41	30,31,32,33,34,35,40	-	30		56
CTTGAGGCCTTTCTTACCCAGAAGCAGAACTGAAGGATGGGAGAACTGAAGGATGACGACTT	CTTGAGGCCTTTCTTACCCAGAAGCAGAA------GGTGGGAGAACTGAAGGATGACGACTT	var187	29C-T-G-A-A-G-1AG25	1	6	0	37	30,31,32,33,34,35	-	30		62
CTTGAGGCCTTTCTTACCCAGAAGCAGAACTGAAGGATGGTGGGAGAACTGAAGGA	CTTGAGGCCTTTCTTACCCAGAAGCAGAA---------GGTGGGAGAACTGAAGGA	var397	29C-T-G-A-A-G-G-A-T-18	0	9	0	-	30,31,32,33,34,35,36,37,38	-	30		56
CTTGAGGCCTTTCTTACCCAGAAGCAGAACTGAAGGATGTGGGAGAACTGAAGGATGACGAC	CTTGAGGCCTTTCTTACCCAGAAGCAGA--------AGGTGGGAGAACTGAAGGATGACGAC	var1198	28A-C-T-G-A-A-G-G-1TG24	1	8	0	38	29,30,31,32,33,34,35,36	-	29		62
CTTGAGGCCTTTCTTACCCAGAAGCAGAACTGAAGGGAGAACTGAAGGATGACGACTTTGAG	CTTGAGGCCTTTCTTACCCAGAAGCAGAA--GGTGGGAGAACTGAAGGATGACGACTTTGAG	var244	29C-T-1AGAT28	2	2	0	33,34	30,31	-	30		62
CTTGAGGCCTTTCTTACCCAGAAGCAGAACTGAAGGTGGGAGAACTGAAGGATGACGACTTT	CTTGAGGCCTTTCTTACCCAGAAGCAGAA-----GGTGGGAGAACTGAAGGATGACGACTTT	var50	29C-T-G-A-A-28	0	5	0	-	30,31,32,33,34	-	30		62
CTTGAGGCCTTTCTTACCCAGAAGCAGAACTGAAGTATGTGGGAGAACTGAAGGATGACGAC	CTTGAGGCCTTTCTTACCCAGAAGCAGA--------AGGTGGGAGAACTGAAGGATGACGAC	var1619	28A-C-T-G-A-A-G-T-1TG24	1	8	0	38	29,30,31,32,33,34,35,36	-	29		62
CTTGAGGCCTTTCTTACCCAGAAGCAGAACTGAAGTGGGAGAACTGAAGGATGACGACTTTG	CTTGAGGCCTTTCTTACCCAGAAGCAGA----AGGTGGGAGAACTGAAGGATGACGACTTTG	var266	28A-C-T-G-1AG28	1	4	0	34	29,30,31,32	-	29		62
CTTGAGGCCTTTCTTACCCAGAAGCAGAACTGAGTGGGAGAACTGAAGGATGACGACTTTGA	CTTGAGGCCTTTCTTACCCAGAAGCAGAA---GGTGGGAGAACTGAAGGATGACGACTTTGA	var1359	29C-T-G-AG29	1	3	0	33	30,31,32	-	30		62
CTTGAGGCCTTTCTTACCCAGAAGCAGAACTGCTTCCAGAAGGTGGGAGAACTGAAGGATGA	CTTGAGGCCTTTCTTACCCAGAAG------------CAGAAGGTGGGAGAACTGAAGGATGA	var1461	24C-A-G-A-A-C-T-G-C-T-T-C-26	0	12	0	-	25,26,27,28,29,30,31,32,33,34,35,36	-	25		62
CTTGAGGCCTTTCTTACCCAGAAGCAGAACTGGGTAAGGTGGGAGAACTGAAGGATGACGAC	CTTGAGGCCTTTCTTACCCAGAAGCAG--------AAGGTGGGAGAACTGAAGGATGACGAC	var902	27A-A-C-T-G-G-G-T-27	0	8	0	-	28,29,30,31,32,33,34,35	-	28		62
CTTGAGGCCTTTCTTACCCAGAAGCAGAACTGGGTAGAACTGAAGGATGACGACTTTGAGAA	CTTGAGGCCTTTCTTACCCAGAAGCAGAAGGTGGGAGAACTGAAGGATGACGACTTTGAGAA	var1305	29CGTGGT2TG27	4	0	0	30,31,32,35	-	-			62
CTTGAGGCCTTTCTTACCCAGAAGCAGAACTGGGTGGGAGAACTGAAGGATGACGACTTTGA	CTTGAGGCCTTTCTTACCCAGAAGCAGAA---GGTGGGAGAACTGAAGGATGACGACTTTGA	var352	29C-T-G-30	0	3	0	-	30,31,32	-	30		62
CTTGAGGCCTTTCTTACCCAGAAGCAGAACTGGTAAGAGAACTGAAGGATGACGACTTTGAG	CTTGAGGCCTTTCTTACCCAGAAGCAGAA--GGTGGGAGAACTGAAGGATGACGACTTTGAG	var1286	29C-T-3AGAG26	2	2	0	35,36	30,31	-	30		62
CTTGAGGCCTTTCTTACCCAGAAGCAGAACTGGTGGGAGAACTGAAGGATGACGACTTTGAG	CTTGAGGCCTTTCTTACCCAGAAGCAGAA--GGTGGGAGAACTGAAGGATGACGACTTTGAG	var130	29C-T-31	0	2	0	-	30,31	-	30		62
CTTGAGGCCTTTCTTACCCAGAAGCAGAACTGTGGGAGAACTGAAGGATGACGACTTTGAGA	CTTGAGGCCTTTCTTACCCAGAAGCAGAAG-GTGGGAGAACTGAAGGATGACGACTTTGAGA	var572	29CGT-31	1	1	0	30	31	-	31		62
CTTGAGGCCTTTCTTACCCAGAAGCAGAACTT-------CTGAAGGATGACGACTTTGAGAA	CTTGAGGCCTTTCTTACCCAGAAGCAGAAGGTGGGAGAACTGAAGGATGACGACTTTGAGAA	var713	29CGTG1-G-G-G-A-G-A-A23	2	0	7	30,31	-	33,34,35,36,37,38,39		33	62
CTTGAGGCCTTTCTTACCCAGAAGCAGAACTT-----CACTGAAGGATGACGACTTTGAGAA	CTTGAGGCCTTTCTTACCCAGAAGCAGAAGGTGGGAGAACTGAAGGATGACGACTTTGAGAA	var1617	29CGTG1-G-G-G-A-GCA24	3	0	5	30,31,38	-	33,34,35,36,37		33	62
CTTGAGGCCTTTCTTACCCAGAAGCAGAACTT----GAACTGAAGGATGACGACTTTGAGAA	CTTGAGGCCTTTCTTACCCAGAAGCAGAAGGTGGGAGAACTGAAGGATGACGACTTTGAGAA	var1581	29CGTG1-G-G-G-A26	2	0	4	30,31	-	33,34,35,36		33	62
CTTGAGGCCTTTCTTACCCAGAAGCAGAACTT---AGAACTGAAGGATGACGACTTTGAGAA	CTTGAGGCCTTTCTTACCCAGAAGCAGAAGGTGGGAGAACTGAAGGATGACGACTTTGAGAA	var1358	29CGTG1-G-G-G27	2	0	3	30,31	-	33,34,35		33	62
CTTGAGGCCTTTCTTACCCAGAAGCAGAACTTAAGCAGAAGCAGAACTGAAGGATGACGACT	CTTGAGGCCTTTCTTACCCAGAAGCAGAA-------GGTGGGAGAACTGAAGGATGACGACT	var1197	29C-T-T-A-A-G-C-AG1ATAG1CG20	4	7	0	37,39,40,42	30,31,32,33,34,35,36	-	30		62
CTTGAGGCCTTTCTTACCCAGAAGCAGAACTTACCCAGAAGCAGGTGGGAGAACTGAAGGAT	CTTGAGGCCTTTCTTACCCAGAAGCAGA--------------AGGTGGGAGAACTGAAGGAT	var1603	28A-C-T-T-A-C-C-C-A-G-A-A-G-C-20	0	14	0	-	29,30,31,32,33,34,35,36,37,38,39,40,41,42	-	29		62
CTTGAGGCCTTTCTTACCCAGAAGCAGAACTTACCCAGAAGGAGAACTGAAGGATGACGACT	CTTGAGGCCTTTCTTACCCAGAAGCAGAA-------GGTGGGAGAACTGAAGGATGACGACT	var1460	29C-T-T-A-C-C-C-AG1ATAG22	3	7	0	37,39,40	30,31,32,33,34,35,36	-	30		62
CTTGAGGCCTTTCTTACCCAGAAGCAGAACTTACCCAGAAGGGAGAACTGAAGGATGACGAC	CTTGAGGCCTTTCTTACCCAGAAGCAGA--------AGGTGGGAGAACTGAAGGATGACGAC	var1583	28A-C-T-T-A-C-C-C-2AGAT22	2	8	0	39,40	29,30,31,32,33,34,35,36	-	29		62
CTTGAGGCCTTTCTTACCCAGAAGCAGAACTTACCCAGAAGGTGGGAGAACTGAAGGATGAC	CTTGAGGCCTTTCTTACCCAGAAG-----------CAGAAGGTGGGAGAACTGAAGGATGAC	var926	24C-A-G-A-A-C-T-T-A-C-C-27	0	11	0	-	25,26,27,28,29,30,31,32,33,34,35	-	25		62
CTTGAGGCCTTTCTTACCCAGAAGCAGAACTTACCCAGAAGTGGGAGAACTGAAGGATGACG	CTTGAGGCCTTTCTTACCCAGAAGCAGA----------AGGTGGGAGAACTGAAGGATGACG	var1582	28A-C-T-T-A-C-C-C-A-G-1AG22	1	10	0	40	29,30,31,32,33,34,35,36,37,38	-	29		62
CTTGAGGCCTTTCTTACCCAGAAGCAGAACTTACCCAGGTGGGAGAACTGAAGGATGACGAC	CTTGAGGCCTTTCTTACCCAGAAGCAGA--------AGGTGGGAGAACTGAAGGATGACGAC	var553	28A-C-T-T-A-C-C-C-26	0	8	0	-	29,30,31,32,33,34,35,36	-	29		62
CTTGAGGCCTTTCTTACCCAGAAGCAGAACTTCAGGTGGGAGAACTGAAGGATGACGACTTT	CTTGAGGCCTTTCTTACCCAGAAGCAGA-----AGGTGGGAGAACTGAAGGATGACGACTTT	var656	28A-C-T-T-C-29	0	5	0	-	29,30,31,32,33	-	29		62
CTTGAGGCCTTTCTTACCCAGAAGCAGAACTTCTGAGAACTGAAGGATGACGACTTTGAGAA	CTTGAGGCCTTTCTTACCCAGAAGCAGAAGGTGGGAGAACTGAAGGATGACGACTTTGAGAA	var851	29CGTG1CGTG28	4	0	0	30,31,33,34	-	-			62
CTTGAGGCCTTTCTTACCCAGAAGCAGAACTTCTGCTTCTGGAGAACTGAAGGATGACGACT	CTTGAGGCCTTTCTTACCCAGAAGCAGAAGGT-------GGGAGAACTGAAGGATGACGACT	var1544	29CGTG1C-T-G-C-T-T-C-TG22	3	7	0	30,31,40	33,34,35,36,37,38,39	-	33		62
CTTGAGGCCTTTCTTACCCAGAAGCAGAACTTCTGGGAGAACTGAAGGATGACGACTTTGAG	CTTGAGGCCTTTCTTACCCAGAAGCAGAA--GGTGGGAGAACTGAAGGATGACGACTTTGAG	var334	29C-T-TGCG29	2	2	0	32,33	30,31	-	30		62
CTTGAGGCCTTTCTTACCCAGAAGCAGAACTTCTGGTGGGAGAACTGAAGGATGACGACTTT	CTTGAGGCCTTTCTTACCCAGAAGCAGAA-----GGTGGGAGAACTGAAGGATGACGACTTT	var1009	29C-T-T-C-T-28	0	5	0	-	30,31,32,33,34	-	30		62
CTTGAGGCCTTTCTTACCCAGAAGCAGAACTTCTGTGGGAGAACTGAAGGATGACGACTTTG	CTTGAGGCCTTTCTTACCCAGAAGCAGAA----GGTGGGAGAACTGAAGGATGACGACTTTG	var1104	29C-T-T-C-TG28	1	4	0	34	30,31,32,33	-	30		62
CTTGAGGCCTTTCTTACCCAGAAGCAGAACTTCTTACCCAGAGGTGGGAGAACTGAAGGATG	CTTGAGGCCTTTCTTACCCAGAAGCAGA-------------AGGTGGGAGAACTGAAGGATG	var1241	28A-C-T-T-C-T-T-A-C-C-C-A-G-21	0	13	0	-	29,30,31,32,33,34,35,36,37,38,39,40,41	-	29		62
CTTGAGGCCTTTCTTACCCAGAAGCAGAACTTCTTGTGGGAGAACTGAAGGATGACGACTTT	CTTGAGGCCTTTCTTACCCAGAAGCAGAA-----GGTGGGAGAACTGAAGGATGACGACTTT	var1502	29C-T-T-C-T-TG27	1	5	0	35	30,31,32,33,34	-	30		62
CTTGAGGCCTTTCTTACCCAGAAGCAGAACTTGTGGGAGAACTGAAGGATGACGACTTTGAG	CTTGAGGCCTTTCTTACCCAGAAGCAGAAG--GTGGGAGAACTGAAGGATGACGACTTTGAG	var745	29CGT-T-30	1	2	0	30	31,32	-	31		62
CTTGAGGCCTTTCTTACCCAGAAGCAGAACTTTCTTACCCAGAACTGAAGGATGACGACTTT	CTTGAGGCCTTTCTTACCCAGAAGCAGAAGGT-----GGGAGAACTGAAGGATGACGACTTT	var929	29CGTG1T-C-T-T-A-CGCGCG22	5	5	0	30,31,38,39,40	33,34,35,36,37	-	33		62
CTTGAGGCCTTTCTTACCCAGAAGCAGAACTTTCTTACCCAGAAGGAGAACTGAAGGATGAC	CTTGAGGCCTTTCTTACCCAGAAGCAGAA-----------GGTGGGAGAACTGAAGGATGAC	var1388	29C-T-T-T-C-T-T-A-C-C-C-AG1ATAG18	3	11	0	41,43,44	30,31,32,33,34,35,36,37,38,39,40	-	30		62
CTTGAGGCCTTTCTTACCCAGAAGCAGAACTTTCTTACCCAGGTGGGAGAACTGAAGGATGA	CTTGAGGCCTTTCTTACCCAGAAGCAGA------------AGGTGGGAGAACTGAAGGATGA	var420	28A-C-T-T-T-C-T-T-A-C-C-C-22	0	12	0	-	29,30,31,32,33,34,35,36,37,38,39,40	-	29		62
CTTGAGGCCTTTCTTACCCAGAAGCAGAAG	CTTGAGGCCTTTCTTACCCAGAAGCAGAAG	var1196	30	0	0	32	-	-	31,32,33,34,35,36,37,38,39,40,41,42,43,44,45,46,47,48,49,50,51,52,53,54,55,56,57,58,59,60,61,62	-	31	30
CTTGAGGCCTTTCTTACCCAGAAGCAGAAG	CTTGAGGCCTTTCTTACCCAGAAGCAGAAG	var1321	30	0	0	32	-	-	31,32,33,34,35,36,37,38,39,40,41,42,43,44,45,46,47,48,49,50,51,52,53,54,55,56,57,58,59,60,61,62	-	31	30
CTTGAGGCCTTTCTTACCCAGAAGCAGAAG	CTTGAGGCCTTTCTTACCCAGAAGCAGAAG	var1543	30	0	0	32	-	-	31,32,33,34,35,36,37,38,39,40,41,42,43,44,45,46,47,48,49,50,51,52,53,54,55,56,57,58,59,60,61,62	-	31	30
CTTGAGGCCTTTCTTACCCAGAAGCAGAAG	CTTGAGGCCTTTCTTACCCAGAAGCAGAAG	var943	30	0	0	32	-	-	31,32,33,34,35,36,37,38,39,40,41,42,43,44,45,46,47,48,49,50,51,52,53,54,55,56,57,58,59,60,61,62	-	31	30
CTTGAGGCCTTTCTTACCCAGAAGCAGAAG	CTTGAGGCCTTTCTTACCCAGAAGCAGAAG	var944	30	0	0	32	-	-	31,32,33,34,35,36,37,38,39,40,41,42,43,44,45,46,47,48,49,50,51,52,53,54,55,56,57,58,59,60,61,62	-	31	30
CTTGAGGCCTTTCTTACCCAGAAGCAGAAG------GAACTGAAGGATGACGACTTTGAGAA	CTTGAGGCCTTTCTTACCCAGAAGCAGAAGGTGGGAGAACTGAAGGATGACGACTTTGAGAA	var1385	30-G-T-G-G-G-A26	0	0	6	-	-	31,32,33,34,35,36		31	62
CTTGAGGCCTTTCTTACCCAGAAGCAGAAG-TGGGAGAACTGAAGGATGACGACTTTGAGAA	CTTGAGGCCTTTCTTACCCAGAAGCAGAAGGTGGGAGAACTGAAGGATGACGACTTTGAGAA	var246	30-G31	0	0	1	-	-	31		31	62
CTTGAGGCCTTTCTTACCCAGAAGCAGAAGAAACAGAAGGTGGGAGAACTGAAGGATGACGA	CTTGAGGCCTTTCTTACCCAGAAGCAGA---------AGGTGGGAGAACTGAAGGATGACGA	var1662	28A-G-A-A-A-C-A-G-A-25	0	9	0	-	29,30,31,32,33,34,35,36,37	-	29		62
CTTGAGGCCTTTCTTACCCAGAAGCAGAAGAAAGGTGGGAGA	CTTGAGGCCTTTCTTACCCAGAAGCAG----AAGGTGGGAGA	var1285	27A-A-G-A-11	0	4	0	-	28,29,30,31	-	28		42
CTTGAGGCCTTTCTTACCCAGAAGCAGAAGAACTGAAGGATGAACTGAA-GATGACGACTTTG	CTTGAGGCCTTTCTTACCCAGAAGCAGAAG----GTGGGA-GAACTGAAGGATGACGACTTTG	var484	30A-A-C-T-1ATAG3T-8-G13	2	5	0	36,37	31,32,33,34,41	-	31		63
CTTGAGGCCTTTCTTACCCAGAAGCAGAAGAACTGAAGGTGGGAGAACTGAAGGATGACGAC	CTTGAGGCCTTTCTTACCCAGAAGCA--------GAAGGTGGGAGAACTGAAGGATGACGAC	var376	26G-A-A-G-A-A-C-T-28	0	8	0	-	27,28,29,30,31,32,33,34	-	27		62
CTTGAGGCCTTTCTTACCCAGAAGCAGAAGAAGAAGAAGGTGGGAGAACTGAAGGATGACGA	CTTGAGGCCTTTCTTACCCAGAAGCAGAA---------GGTGGGAGAACTGAAGGATGACGA	var1275	29G-A-A-G-A-A-G-A-A-24	0	9	0	-	30,31,32,33,34,35,36,37,38	-	30		62
CTTGAGGCCTTTCTTACCCAGAAGCAGAAGAAGAAGGTGGGAGAACTGAAGGATGACGACTT	CTTGAGGCCTTTCTTACCCAGAAGCAGAA------GGTGGGAGAACTGAAGGATGACGACTT	var421	29G-A-A-G-A-A-27	0	6	0	-	30,31,32,33,34,35	-	30		62
CTTGAGGCCTTTCTTACCCAGAAGCAGAAGAAGCAGAAGAAGGTGGGAGAACTGAAGGATGA	CTTGAGGCCTTTCTTACCCAGAAGC------------AGAAGGTGGGAGAACTGAAGGATGA	var1185	25A-G-A-A-G-A-A-G-C-A-G-A-25	0	12	0	-	26,27,28,29,30,31,32,33,34,35,36,37	-	26		62
CTTGAGGCCTTTCTTACCCAGAAGCAGAAGAAGGTGGGAGAACTGAAGGATGACGACTTTGA	CTTGAGGCCTTTCTTACCCAGAAGCAGAA---GGTGGGAGAACTGAAGGATGACGACTTTGA	var108	29G-A-A-30	0	3	0	-	30,31,32	-	30		62
CTTGAGGCCTTTCTTACCCAGAAGCAGAAGAGGTGGGAGAACTGAAGGATGACGACTTTGAG	CTTGAGGCCTTTCTTACCCAGAAGCAGAAG--GTGGGAGAACTGAAGGATGACGACTTTGAG	var911	30A-G-30	0	2	0	-	31,32	-	31		62
CTTGAGGCCTTTCTTACCCAGAAGCAGAAGATG	CTTGAGGCCTTTCTTACCCAGAAGCAGAAGGTG	var1641	30AG2	1	0	0	31	-	-			33
CTTGAGGCCTTTCTTACCCAGAAGCAGAAGATGGGAGAACTGAAGGATGACGACTTTGAGAA	CTTGAGGCCTTTCTTACCCAGAAGCAGAAGGTGGGAGAACTGAAGGATGACGACTTTGAGAA	var168	30AG31	1	0	0	31	-	-			62
CTTGAGGCCTTTCTTACCCAGAAGCAGAAGCAGAAGCAGAAAGGTGGGAGAACTGAAGGATG	CTTGAGGCCTTTCTTACCCAGAAGCAG-------------AAGGTGGGAGAACTGAAGGATG	var1542	27A-A-G-C-A-G-A-A-G-C-A-G-A-22	0	13	0	-	28,29,30,31,32,33,34,35,36,37,38,39,40	-	28		62
CTTGAGGCCTTTCTTACCCAGAAGCAGAAGCAGAAGCAGGTGGGAGAACTGAAGGATGACGA	CTTGAGGCCTTTCTTACCCAGAAGCAGA---------AGGTGGGAGAACTGAAGGATGACGA	var1606	28A-G-C-A-G-A-A-G-C-25	0	9	0	-	29,30,31,32,33,34,35,36,37	-	29		62
CTTGAGGCCTTTCTTACCCAGAAGCAGAAGCAGAAGGTGGGAGAACTGAAGGATGACGACTT	CTTGAGGCCTTTCTTACCCAGA------AGCAGAAGGTGGGAGAACTGAAGGATGACGACTT	var205	22A-G-C-A-G-A-34	0	6	0	-	23,24,25,26,27,28	-	23		62
CTTGAGGCCTTTCTTACCCAGAAGCAGAAGCAGGTGGGAGAACTGAAGGATGACGACTTTGA	CTTGAGGCCTTTCTTACCCAGAAGCAGAAG---GTGGGAGAACTGAAGGATGACGACTTTGA	var241	30C-A-G-29	0	3	0	-	31,32,33	-	31		62
CTTGAGGCCTTTCTTACCCAGAAGCAGAAGCTGGGAGAACTGAAGGATGACGACTTTGAGAA	CTTGAGGCCTTTCTTACCCAGAAGCAGAAGGTGGGAGAACTGAAGGATGACGACTTTGAGAA	var1123	30CG31	1	0	0	31	-	-			62
CTTGAGGCCTTTCTTACCCAGAAGCAGAAGCTTCTTACCCAGAAGCAGAACTGAAGGATGAC	CTTGAGGCCTTTCTTACCCAGAAGCAGAAGGTG-----------GGAGAACTGAAGGATGAC	var1020	30CG1TGC-T-T-A-C-C-C-A-G-A-A-1CG16	3	11	0	31,33,45	34,35,36,37,38,39,40,41,42,43,44	-	34		62
CTTGAGGCCTTTCTTACCCAGAAGCAGAAGCTTGTGGGAGAACTGAAGGATGACGACTTTGA	CTTGAGGCCTTTCTTACCCAGAAGCAGAAG---GTGGGAGAACTGAAGGATGACGACTTTGA	var466	30C-T-T-29	0	3	0	-	31,32,33	-	31		62
CTTGAGGCCTTTCTTACCCAGAAGCAGAAGG	CTTGAGGCCTTTCTTACCCAGAAGCAGAAGG	var1090	31	0	0	31	-	-	32,33,34,35,36,37,38,39,40,41,42,43,44,45,46,47,48,49,50,51,52,53,54,55,56,57,58,59,60,61,62	-	32	31
CTTGAGGCCTTTCTTACCCAGAAGCAGAAGG	CTTGAGGCCTTTCTTACCCAGAAGCAGAAGG	var14	31	0	0	31	-	-	32,33,34,35,36,37,38,39,40,41,42,43,44,45,46,47,48,49,50,51,52,53,54,55,56,57,58,59,60,61,62	-	32	31
CTTGAGGCCTTTCTTACCCAGAAGCAGAAGG-------ACTGAAGGATGACGACTTTGAGAA	CTTGAGGCCTTTCTTACCCAGAAGCAGAAGGTGGGAGAACTGAAGGATGACGACTTTGAGAA	var1055	31-T-G-G-G-A-G-A24	0	0	7	-	-	32,33,34,35,36,37,38		32	62
CTTGAGGCCTTTCTTACCCAGAAGCAGAAGGAAGGAGAACTGAAGGATGACGACTTTGAGAA	CTTGAGGCCTTTCTTACCCAGAAGCAGAAGGTGGGAGAACTGAAGGATGACGACTTTGAGAA	var1554	31ATAG29	2	0	0	32,33	-	-			62
CTTGAGGCCTTTCTTACCCAGAAGCAGAAGGAGGGAGAAATGAAGGATGACGACTTTGAGAA	CTTGAGGCCTTTCTTACCCAGAAGCAGAAGGTGGGAGAACTGAAGGATGACGACTTTGAGAA	var1094	31AT7AC22	2	0	0	32,40	-	-			62
CTTGAGGCCTTTCTTACCCAGAAGCAGAAGGAGGGAGAACTGAAGGATGACGACTATGAGAA	CTTGAGGCCTTTCTTACCCAGAAGCAGAAGGTGGGAGAACTGAAGGATGACGACTTTGAGAA	var907	31AT23AT6	2	0	0	32,56	-	-			62
CTTGAGGCCTTTCTTACCCAGAAGCAGAAGGAGGGAGAACTGAAGGATGACGACTTTGAGAA	CTTGAGGCCTTTCTTACCCAGAAGCAGAAGGTGGGAGAACTGAAGGATGACGACTTTGAGAA	var21	31AT30	1	0	0	32	-	-			62
CTTGAGGCCTTTCTTACCCAGAAGCAGAAGGATGAAGGATGAACTGAAGGATGACGACTTTG	CTTGAGGCCTTTCTTACCCAGAAGCAGAAGG-TG--GGA-GAACTGAAGGATGACGACTTTG	var989	31A-2A-A-3T-22	0	4	0	-	32,35,36,40	-	32		62
CTTGAGGCCTTTCTTACCCAGAAGCAGAAGGATGGGAGAACTGAAGGATGACGACTTTGAGA	CTTGAGGCCTTTCTTACCCAGAAGCAGAAGG-TGGGAGAACTGAAGGATGACGACTTTGAGA	var952	31A-30	0	1	0	-	32	-	32		62
CTTGAGGCCTTTCTTACCCAGAAGCAGAAGGCGGGAGAACTGAAGGATGACGACTTTGAGAA	CTTGAGGCCTTTCTTACCCAGAAGCAGAAGGTGGGAGAACTGAAGGATGACGACTTTGAGAA	var57	31CT30	1	0	0	32	-	-			62
CTTGAGGCCTTTCTTACCCAGAAGCAGAAGGGGGGAGAACTGAAGGATGACGACTTTGAGAA	CTTGAGGCCTTTCTTACCCAGAAGCAGAAGGTGGGAGAACTGAAGGATGACGACTTTGAGAA	var102	31GT30	1	0	0	32	-	-			62
CTTGAGGCCTTTCTTACCCAGAAGCAGAAGGGTGGGAGAACTGAAGGATGACGACTTTGAGA	CTTGAGGCCTTTCTTACCCAGAAGCAGAAGG-TGGGAGAACTGAAGGATGACGACTTTGAGA	var194	31G-30	0	1	0	-	32	-	32		62
CTTGAGGCCTTTCTTACCCAGAAGCAGAAGGT	CTTGAGGCCTTTCTTACCCAGAAGCAGAAGGT	var1072	32	0	0	30	-	-	33,34,35,36,37,38,39,40,41,42,43,44,45,46,47,48,49,50,51,52,53,54,55,56,57,58,59,60,61,62	-	33	32
CTTGAGGCCTTTCTTACCCAGAAGCAGAAGGT-GGAGAACTGAAGGATGACGACTTTGAGAA	CTTGAGGCCTTTCTTACCCAGAAGCAGAAGGTGGGAGAACTGAAGGATGACGACTTTGAGAA	var208	32-G29	0	0	1	-	-	33		33	62
CTTGAGGCCTTTCTTACCCAGAAGCAGAAGGTAAGGTGGGAGAACTGAAGGATGACGACTTT	CTTGAGGCCTTTCTTACCCAGAAGCAG-----AAGGTGGGAGAACTGAAGGATGACGACTTT	var1580	27A-A-G-G-T-30	0	5	0	-	28,29,30,31,32	-	28		62
CTTGAGGCCTTTCTTACCCAGAAGCAGAAGGTAGGAGAACTGAAGGATGACGACTTTGAGAA	CTTGAGGCCTTTCTTACCCAGAAGCAGAAGGTGGGAGAACTGAAGGATGACGACTTTGAGAA	var155	32AG29	1	0	0	33	-	-			62
CTTGAGGCCTTTCTTACCCAGAAGCAGAAGGTCGGAGAACTGAAGGATGACGACTTTGAGAA	CTTGAGGCCTTTCTTACCCAGAAGCAGAAGGTGGGAGAACTGAAGGATGACGACTTTGAGAA	var1106	32CG29	1	0	0	33	-	-			62
CTTGAGGCCTTTCTTACCCAGAAGCAGAAGGTGAAGAGAACTGAAGGATGACGACTTTGAGA	CTTGAGGCCTTTCTTACCCAGAAGCAGAAGGTG-GGAGAACTGAAGGATGACGACTTTGAGA	var1501	33A-AG27	1	1	0	35	34	-	34		62
CTTGAGGCCTTTCTTACCCAGAAGCAGAAGGTGAGAGAACTGAAGGATGACGACTTTGAGAA	CTTGAGGCCTTTCTTACCCAGAAGCAGAAGGTGGGAGAACTGAAGGATGACGACTTTGAGAA	var124	33AG28	1	0	0	34	-	-			62
CTTGAGGCCTTTCTTACCCAGAAGCAGAAGGTGCGAGAACTGAAGGATGACGACTTTGAGAA	CTTGAGGCCTTTCTTACCCAGAAGCAGAAGGTGGGAGAACTGAAGGATGACGACTTTGAGAA	var797	33CG28	1	0	0	34	-	-			62
CTTGAGGCCTTTCTTACCCAGAAGCAGAAGGTGGAAGAACTGAAGGATGACGACTTTGAGAA	CTTGAGGCCTTTCTTACCCAGAAGCAGAAGGTGGGAGAACTGAAGGATGACGACTTTGAGAA	var177	34AG27	1	0	0	35	-	-			62
CTTGAGGCCTTTCTTACCCAGAAGCAGAAGGTGGCAGAACTGAAGGATGACGACTTTGAGAA	CTTGAGGCCTTTCTTACCCAGAAGCAGAAGGTGGGAGAACTGAAGGATGACGACTTTGAGAA	var1468	34CG27	1	0	0	35	-	-			62
CTTGAGGCCTTTCTTACCCAGAAGCAGAAGGTGGGAAAACTGAAGGATGACGACTTTGAGAA	CTTGAGGCCTTTCTTACCCAGAAGCAGAAGGTGGGAGAACTGAAGGATGACGACTTTGAGAA	var209	36AG25	1	0	0	37	-	-			62
CTTGAGGCCTTTCTTACCCAGAAGCAGAAGGTGGGACAACTGAAGGATGACGACTTTGAGAA	CTTGAGGCCTTTCTTACCCAGAAGCAGAAGGTGGGAGAACTGAAGGATGACGACTTTGAGAA	var1399	36CG25	1	0	0	37	-	-			62
CTTGAGGCCTTTCTTACCCAGAAGCAGAAGGTGGGAGAAATGAAGGATGACGACTTTGAGAA	CTTGAGGCCTTTCTTACCCAGAAGCAGAAGGTGGGAGAACTGAAGGATGACGACTTTGAGAA	var180	39AC22	1	0	0	40	-	-			62
CTTGAGGCCTTTCTTACCCAGAAGCAGAAGGTGGGAGAACAGAAGGATGACGACTTTGAGAA	CTTGAGGCCTTTCTTACCCAGAAGCAGAAGGTGGGAGAACTGAAGGATGACGACTTTGAGAA	var329	40AT21	1	0	0	41	-	-			62
CTTGAGGCCTTTCTTACCCAGAAGCAGAAGGTGGGAGAACCGAAGGATGACGACTTTGAGAA	CTTGAGGCCTTTCTTACCCAGAAGCAGAAGGTGGGAGAACTGAAGGATGACGACTTTGAGAA	var78	40CT21	1	0	0	41	-	-			62
CTTGAGGCCTTTCTTACCCAGAAGCAGAAGGTGGGAGAACGGAAGGATGACGACTTTGAGAA	CTTGAGGCCTTTCTTACCCAGAAGCAGAAGGTGGGAGAACTGAAGGATGACGACTTTGAGAA	var776	40GT21	1	0	0	41	-	-			62
CTTGAGGCCTTTCTTACCCAGAAGCAGAAGGTGGGAGAACTAAAGGATGACGACTTTGAGAA	CTTGAGGCCTTTCTTACCCAGAAGCAGAAGGTGGGAGAACTGAAGGATGACGACTTTGAGAA	var26	41AG20	1	0	0	42	-	-			62
CTTGAGGCCTTTCTTACCCAGAAGCAGAAGGTGGGAGAACTGAAAGATGACGACTTTGAGAA	CTTGAGGCCTTTCTTACCCAGAAGCAGAAGGTGGGAGAACTGAAGGATGACGACTTTGAGAA	var240	44AG17	1	0	0	45	-	-			62
CTTGAGGCCTTTCTTACCCAGAAGCAGAAGGTGGGAGAACTGAACGATGACGACTTTGAGAA	CTTGAGGCCTTTCTTACCCAGAAGCAGAAGGTGGGAGAACTGAAGGATGACGACTTTGAGAA	var708	44CG17	1	0	0	45	-	-			62
CTTGAGGCCTTTCTTACCCAGAAGCAGAAGGTGGGAGAACTGAAGAATGACGACTTTGAGAA	CTTGAGGCCTTTCTTACCCAGAAGCAGAAGGTGGGAGAACTGAAGGATGACGACTTTGAGAA	var176	45AG16	1	0	0	46	-	-			62
CTTGAGGCCTTTCTTACCCAGAAGCAGAAGGTGGGAGAACTGAAGCATGACGACTTTGAGAA	CTTGAGGCCTTTCTTACCCAGAAGCAGAAGGTGGGAGAACTGAAGGATGACGACTTTGAGAA	var1078	45CG16	1	0	0	46	-	-			62
CTTGAGGCCTTTCTTACCCAGAAGCAGAAGGTGGGAGAACTGAAGGAAGACGACTTTGAGAA	CTTGAGGCCTTTCTTACCCAGAAGCAGAAGGTGGGAGAACTGAAGGATGACGACTTTGAGAA	var434	47AT14	1	0	0	48	-	-			62
CTTGAGGCCTTTCTTACCCAGAAGCAGAAGGTGGGAGAACTGAAGGACGACGACTTTGAGAA	CTTGAGGCCTTTCTTACCCAGAAGCAGAAGGTGGGAGAACTGAAGGATGACGACTTTGAGAA	var69	47CT14	1	0	0	48	-	-			62
CTTGAGGCCTTTCTTACCCAGAAGCAGAAGGTGGGAGAACTGAAGGAGGACGACTTTGAGAA	CTTGAGGCCTTTCTTACCCAGAAGCAGAAGGTGGGAGAACTGAAGGATGACGACTTTGAGAA	var874	47GT14	1	0	0	48	-	-			62
CTTGAGGCCTTTCTTACCCAGAAGCAGAAGGTGGGAGAACTGAAGGATAACGACTTTGAGAA	CTTGAGGCCTTTCTTACCCAGAAGCAGAAGGTGGGAGAACTGAAGGATGACGACTTTGAGAA	var138	48AG13	1	0	0	49	-	-			62
CTTGAGGCCTTTCTTACCCAGAAGCAGAAGGTGGGAGAACTGAAGGATGAAGACTTTGAGAA	CTTGAGGCCTTTCTTACCCAGAAGCAGAAGGTGGGAGAACTGAAGGATGACGACTTTGAGAA	var278	50AC11	1	0	0	51	-	-			62
CTTGAGGCCTTTCTTACCCAGAAGCAGAAGGTGGGAGAACTGAAGGATGACAACTTTGAGAA	CTTGAGGCCTTTCTTACCCAGAAGCAGAAGGTGGGAGAACTGAAGGATGACGACTTTGAGAA	var112	51AG10	1	0	0	52	-	-			62
CTTGAGGCCTTTCTTACCCAGAAGCAGAAGGTGGGAGAACTGAAGGATGACCACTTTGAGAA	CTTGAGGCCTTTCTTACCCAGAAGCAGAAGGTGGGAGAACTGAAGGATGACGACTTTGAGAA	var1206	51CG10	1	0	0	52	-	-			62
CTTGAGGCCTTTCTTACCCAGAAGCAGAAGGTGGGAGAACTGAAGGATGACGA-TTTGAGAA	CTTGAGGCCTTTCTTACCCAGAAGCAGAAGGTGGGAGAACTGAAGGATGACGACTTTGAGAA	var731	53-C8	0	0	1	-	-	54		54	62
CTTGAGGCCTTTCTTACCCAGAAGCAGAAGGTGGGAGAACTGAAGGATGACGAATTTGAGAA	CTTGAGGCCTTTCTTACCCAGAAGCAGAAGGTGGGAGAACTGAAGGATGACGACTTTGAGAA	var90	53AC8	1	0	0	54	-	-			62
CTTGAGGCCTTTCTTACCCAGAAGCAGAAGGTGGGAGAACTGAAGGATGACGAC-TTGAGAA	CTTGAGGCCTTTCTTACCCAGAAGCAGAAGGTGGGAGAACTGAAGGATGACGACTTTGAGAA	var93	54-T7	0	0	1	-	-	55		55	62
CTTGAGGCCTTTCTTACCCAGAAGCAGAAGGTGGGAGAACTGAAGGATGACGACATTGAGAA	CTTGAGGCCTTTCTTACCCAGAAGCAGAAGGTGGGAGAACTGAAGGATGACGACTTTGAGAA	var322	54AT7	1	0	0	55	-	-			62
CTTGAGGCCTTTCTTACCCAGAAGCAGAAGGTGGGAGAACTGAAGGATGACGACCTTGAGAA	CTTGAGGCCTTTCTTACCCAGAAGCAGAAGGTGGGAGAACTGAAGGATGACGACTTTGAGAA	var215	54CT7	1	0	0	55	-	-			62
CTTGAGGCCTTTCTTACCCAGAAGCAGAAGGTGGGAGAACTGAAGGATGACGACCTTTGAGA	CTTGAGGCCTTTCTTACCCAGAAGCAGAAGGTGGGAGAACTGAAGGATGACGA-CTTTGAGA	var1249	53C-8	0	1	0	-	54	-	54		62
CTTGAGGCCTTTCTTACCCAGAAGCAGAAGGTGGGAGAACTGAAGGATGACGACGTTGAGAA	CTTGAGGCCTTTCTTACCCAGAAGCAGAAGGTGGGAGAACTGAAGGATGACGACTTTGAGAA	var564	54GT7	1	0	0	55	-	-			62
CTTGAGGCCTTTCTTACCCAGAAGCAGAAGGTGGGAGAACTGAAGGATGACGACTATGAGAA	CTTGAGGCCTTTCTTACCCAGAAGCAGAAGGTGGGAGAACTGAAGGATGACGACTTTGAGAA	var351	55AT6	1	0	0	56	-	-			62
CTTGAGGCCTTTCTTACCCAGAAGCAGAAGGTGGGAGAACTGAAGGATGACGACTCTGAGAA	CTTGAGGCCTTTCTTACCCAGAAGCAGAAGGTGGGAGAACTGAAGGATGACGACTTTGAGAA	var562	55CT6	1	0	0	56	-	-			62
CTTGAGGCCTTTCTTACCCAGAAGCAGAAGGTGGGAGAACTGAAGGATGACGACTGTGAGAA	CTTGAGGCCTTTCTTACCCAGAAGCAGAAGGTGGGAGAACTGAAGGATGACGACTTTGAGAA	var693	55GT6	1	0	0	56	-	-			62
CTTGAGGCCTTTCTTACCCAGAAGCAGAAGGTGGGAGAACTGAAGGATGACGACTTAGAGAA	CTTGAGGCCTTTCTTACCCAGAAGCAGAAGGTGGGAGAACTGAAGGATGACGACTTTGAGAA	var460	56AT5	1	0	0	57	-	-			62
CTTGAGGCCTTTCTTACCCAGAAGCAGAAGGTGGGAGAACTGAAGGATGACGACTTCGAGAA	CTTGAGGCCTTTCTTACCCAGAAGCAGAAGGTGGGAGAACTGAAGGATGACGACTTTGAGAA	var906	56CT5	1	0	0	57	-	-			62
CTTGAGGCCTTTCTTACCCAGAAGCAGAAGGTGGGAGAACTGAAGGATGACGACTTGGAGAA	CTTGAGGCCTTTCTTACCCAGAAGCAGAAGGTGGGAGAACTGAAGGATGACGACTTTGAGAA	var1509	56GT5	1	0	0	57	-	-			62
CTTGAGGCCTTTCTTACCCAGAAGCAGAAGGTGGGAGAACTGAAGGATGACGACTTT-AGAA	CTTGAGGCCTTTCTTACCCAGAAGCAGAAGGTGGGAGAACTGAAGGATGACGACTTTGAGAA	var477	57-G4	0	0	1	-	-	58		58	62
CTTGAGGCCTTTCTTACCCAGAAGCAGAAGGTGGGAGAACTGAAGGATGACGACTTTAAGAA	CTTGAGGCCTTTCTTACCCAGAAGCAGAAGGTGGGAGAACTGAAGGATGACGACTTTGAGAA	var214	57AG4	1	0	0	58	-	-			62
CTTGAGGCCTTTCTTACCCAGAAGCAGAAGGTGGGAGAACTGAAGGATGACGACTTTCAGAA	CTTGAGGCCTTTCTTACCCAGAAGCAGAAGGTGGGAGAACTGAAGGATGACGACTTTGAGAA	var1207	57CG4	1	0	0	58	-	-			62
CTTGAGGCCTTTCTTACCCAGAAGCAGAAGGTGGGAGAACTGAAGGATGACGACTTTG	CTTGAGGCCTTTCTTACCCAGAAGCAGAAGGTGGGAGAACTGAAGGATGACGACTTTG	var156	58	0	0	4	-	-	59,60,61,62	-	59	58
CTTGAGGCCTTTCTTACCCAGAAGCAGAAGGTGGGAGAACTGAAGGATGACGACTTTGA	CTTGAGGCCTTTCTTACCCAGAAGCAGAAGGTGGGAGAACTGAAGGATGACGACTTTGA	var371	59	0	0	3	-	-	60,61,62	-	60	59
CTTGAGGCCTTTCTTACCCAGAAGCAGAAGGTGGGAGAACTGAAGGATGACGACTTTGA	CTTGAGGCCTTTCTTACCCAGAAGCAGAAGGTGGGAGAACTGAAGGATGACGACTTTGA	var38	59	0	0	3	-	-	60,61,62	-	60	59
CTTGAGGCCTTTCTTACCCAGAAGCAGAAGGTGGGAGAACTGAAGGATGACGACTTTGAAAA	CTTGAGGCCTTTCTTACCCAGAAGCAGAAGGTGGGAGAACTGAAGGATGACGACTTTGAGAA	var153	59AG2	1	0	0	60	-	-			62
CTTGAGGCCTTTCTTACCCAGAAGCAGAAGGTGGGAGAACTGAAGGATGACGACTTTGACAA	CTTGAGGCCTTTCTTACCCAGAAGCAGAAGGTGGGAGAACTGAAGGATGACGACTTTGAGAA	var853	59CG2	1	0	0	60	-	-			62
CTTGAGGCCTTTCTTACCCAGAAGCAGAAGGTGGGAGAACTGAAGGATGACGACTTTGAG	CTTGAGGCCTTTCTTACCCAGAAGCAGAAGGTGGGAGAACTGAAGGATGACGACTTTGAG	var1398	60	0	0	2	-	-	61,62	-	61	60
CTTGAGGCCTTTCTTACCCAGAAGCAGAAGGTGGGAGAACTGAAGGATGACGACTTTGAG	CTTGAGGCCTTTCTTACCCAGAAGCAGAAGGTGGGAGAACTGAAGGATGACGACTTTGAG	var141	60	0	0	2	-	-	61,62	-	61	60
CTTGAGGCCTTTCTTACCCAGAAGCAGAAGGTGGGAGAACTGAAGGATGACGACTTTGAG	CTTGAGGCCTTTCTTACCCAGAAGCAGAAGGTGGGAGAACTGAAGGATGACGACTTTGAG	var302	60	0	0	2	-	-	61,62	-	61	60
CTTGAGGCCTTTCTTACCCAGAAGCAGAAGGTGGGAGAACTGAAGGATGACGACTTTGAGA	CTTGAGGCCTTTCTTACCCAGAAGCAGAAGGTGGGAGAACTGAAGGATGACGACTTTGAGA	var29	61	0	0	1	-	-	62	-	62	61
CTTGAGGCCTTTCTTACCCAGAAGCAGAAGGTGGGAGAACTGAAGGATGACGACTTTGAGA	CTTGAGGCCTTTCTTACCCAGAAGCAGAAGGTGGGAGAACTGAAGGATGACGACTTTGAGA	var307	61	0	0	1	-	-	62	-	62	61
CTTGAGGCCTTTCTTACCCAGAAGCAGAAGGTGGGAGAACTGAAGGATGACGACTTTGAGA	CTTGAGGCCTTTCTTACCCAGAAGCAGAAGGTGGGAGAACTGAAGGATGACGACTTTGAGA	var403	61	0	0	1	-	-	62	-	62	61
CTTGAGGCCTTTCTTACCCAGAAGCAGAAGGTGGGAGAACTGAAGGATGACGACTTTGATAA	CTTGAGGCCTTTCTTACCCAGAAGCAGAAGGTGGGAGAACTGAAGGATGACGACTTTGAGAA	var454	59TG2	1	0	0	60	-	-			62
CTTGAGGCCTTTCTTACCCAGAAGCAGAAGGTGGGAGAACTGAAGGATGACGACTTTGCGAA	CTTGAGGCCTTTCTTACCCAGAAGCAGAAGGTGGGAGAACTGAAGGATGACGACTTTGAGAA	var689	58CA3	1	0	0	59	-	-			62
CTTGAGGCCTTTCTTACCCAGAAGCAGAAGGTGGGAGAACTGAAGGATGACGACTTTGGGAA	CTTGAGGCCTTTCTTACCCAGAAGCAGAAGGTGGGAGAACTGAAGGATGACGACTTTGAGAA	var404	58GA3	1	0	0	59	-	-			62
CTTGAGGCCTTTCTTACCCAGAAGCAGAAGGTGGGAGAACTGAAGGATGACGACTTTGTGAA	CTTGAGGCCTTTCTTACCCAGAAGCAGAAGGTGGGAGAACTGAAGGATGACGACTTTGAGAA	var1591	58TA3	1	0	0	59	-	-			62
CTTGAGGCCTTTCTTACCCAGAAGCAGAAGGTGGGAGAACTGAAGGATGACGACTTTTAGAA	CTTGAGGCCTTTCTTACCCAGAAGCAGAAGGTGGGAGAACTGAAGGATGACGACTTTGAGAA	var621	57TG4	1	0	0	58	-	-			62
CTTGAGGCCTTTCTTACCCAGAAGCAGAAGGTGGGAGAACTGAAGGATGACGACTTTTGAGA	CTTGAGGCCTTTCTTACCCAGAAGCAGAAGGTGGGAGAACTGAAGGATGACGAC-TTTGAGA	var816	54T-7	0	1	0	-	55	-	55		62
CTTGAGGCCTTTCTTACCCAGAAGCAGAAGGTGGGAGAACTGAAGGATGACGATTTTGAGAA	CTTGAGGCCTTTCTTACCCAGAAGCAGAAGGTGGGAGAACTGAAGGATGACGACTTTGAGAA	var142	53TC8	1	0	0	54	-	-			62
CTTGAGGCCTTTCTTACCCAGAAGCAGAAGGTGGGAGAACTGAAGGATGACGCCTTTGAGAA	CTTGAGGCCTTTCTTACCCAGAAGCAGAAGGTGGGAGAACTGAAGGATGACGACTTTGAGAA	var88	52CA9	1	0	0	53	-	-			62
CTTGAGGCCTTTCTTACCCAGAAGCAGAAGGTGGGAGAACTGAAGGATGACGGCTTTGAGAA	CTTGAGGCCTTTCTTACCCAGAAGCAGAAGGTGGGAGAACTGAAGGATGACGACTTTGAGAA	var492	52GA9	1	0	0	53	-	-			62
CTTGAGGCCTTTCTTACCCAGAAGCAGAAGGTGGGAGAACTGAAGGATGACGTCTTTGAGAA	CTTGAGGCCTTTCTTACCCAGAAGCAGAAGGTGGGAGAACTGAAGGATGACGACTTTGAGAA	var1124	52TA9	1	0	0	53	-	-			62
CTTGAGGCCTTTCTTACCCAGAAGCAGAAGGTGGGAGAACTGAAGGATGACTACTTTGAGAA	CTTGAGGCCTTTCTTACCCAGAAGCAGAAGGTGGGAGAACTGAAGGATGACGACTTTGAGAA	var718	51TG10	1	0	0	52	-	-			62
CTTGAGGCCTTTCTTACCCAGAAGCAGAAGGTGGGAGAACTGAAGGATGATGACTTTGAGAA	CTTGAGGCCTTTCTTACCCAGAAGCAGAAGGTGGGAGAACTGAAGGATGACGACTTTGAGAA	var171	50TC11	1	0	0	51	-	-			62
CTTGAGGCCTTTCTTACCCAGAAGCAGAAGGTGGGAGAACTGAAGGATGCCGACTTTGAGAA	CTTGAGGCCTTTCTTACCCAGAAGCAGAAGGTGGGAGAACTGAAGGATGACGACTTTGAGAA	var154	49CA12	1	0	0	50	-	-			62
CTTGAGGCCTTTCTTACCCAGAAGCAGAAGGTGGGAGAACTGAAGGATGCCGCCTTTGAGAA	CTTGAGGCCTTTCTTACCCAGAAGCAGAAGGTGGGAGAACTGAAGGATGACGACTTTGAGAA	var1172	49CA2CA9	2	0	0	50,53	-	-			62
CTTGAGGCCTTTCTTACCCAGAAGCAGAAGGTGGGAGAACTGAAGGATGGCGACTTTGAGAA	CTTGAGGCCTTTCTTACCCAGAAGCAGAAGGTGGGAGAACTGAAGGATGACGACTTTGAGAA	var56	49GA12	1	0	0	50	-	-			62
CTTGAGGCCTTTCTTACCCAGAAGCAGAAGGTGGGAGAACTGAAGGATGTCGACTTTGAGAA	CTTGAGGCCTTTCTTACCCAGAAGCAGAAGGTGGGAGAACTGAAGGATGACGACTTTGAGAA	var300	49TA12	1	0	0	50	-	-			62
CTTGAGGCCTTTCTTACCCAGAAGCAGAAGGTGGGAGAACTGAAGGATTACGACTTTGAGAA	CTTGAGGCCTTTCTTACCCAGAAGCAGAAGGTGGGAGAACTGAAGGATGACGACTTTGAGAA	var517	48TG13	1	0	0	49	-	-			62
CTTGAGGCCTTTCTTACCCAGAAGCAGAAGGTGGGAGAACTGAAGGCTGACGACTTTGAGAA	CTTGAGGCCTTTCTTACCCAGAAGCAGAAGGTGGGAGAACTGAAGGATGACGACTTTGAGAA	var426	46CA15	1	0	0	47	-	-			62
CTTGAGGCCTTTCTTACCCAGAAGCAGAAGGTGGGAGAACTGAAGGGTGACGACTTTGAGAA	CTTGAGGCCTTTCTTACCCAGAAGCAGAAGGTGGGAGAACTGAAGGATGACGACTTTGAGAA	var91	46GA15	1	0	0	47	-	-			62
CTTGAGGCCTTTCTTACCCAGAAGCAGAAGGTGGGAGAACTGAAGGTTGACGACTTTGAGAA	CTTGAGGCCTTTCTTACCCAGAAGCAGAAGGTGGGAGAACTGAAGGATGACGACTTTGAGAA	var478	46TA15	1	0	0	47	-	-			62
CTTGAGGCCTTTCTTACCCAGAAGCAGAAGGTGGGAGAACTGAAGTATGACGACTTTGAGAA	CTTGAGGCCTTTCTTACCCAGAAGCAGAAGGTGGGAGAACTGAAGGATGACGACTTTGAGAA	var723	45TG16	1	0	0	46	-	-			62
CTTGAGGCCTTTCTTACCCAGAAGCAGAAGGTGGGAGAACTGAATGATGACGACTTTGAGAA	CTTGAGGCCTTTCTTACCCAGAAGCAGAAGGTGGGAGAACTGAAGGATGACGACTTTGAGAA	var593	44TG17	1	0	0	45	-	-			62
CTTGAGGCCTTTCTTACCCAGAAGCAGAAGGTGGGAGAACTGACGGATGACGACTTTGAGAA	CTTGAGGCCTTTCTTACCCAGAAGCAGAAGGTGGGAGAACTGAAGGATGACGACTTTGAGAA	var199	43CA18	1	0	0	44	-	-			62
CTTGAGGCCTTTCTTACCCAGAAGCAGAAGGTGGGAGAACTGAGGGATGACGACTTTGAGAA	CTTGAGGCCTTTCTTACCCAGAAGCAGAAGGTGGGAGAACTGAAGGATGACGACTTTGAGAA	var61	43GA18	1	0	0	44	-	-			62
CTTGAGGCCTTTCTTACCCAGAAGCAGAAGGTGGGAGAACTGATGGATGACGACTTTGAGAA	CTTGAGGCCTTTCTTACCCAGAAGCAGAAGGTGGGAGAACTGAAGGATGACGACTTTGAGAA	var548	43TA18	1	0	0	44	-	-			62
CTTGAGGCCTTTCTTACCCAGAAGCAGAAGGTGGGAGAACTGCAGGATGACGACTTTGAGAA	CTTGAGGCCTTTCTTACCCAGAAGCAGAAGGTGGGAGAACTGAAGGATGACGACTTTGAGAA	var181	42CA19	1	0	0	43	-	-			62
CTTGAGGCCTTTCTTACCCAGAAGCAGAAGGTGGGAGAACTGGAGGATGACGACTTTGAGAA	CTTGAGGCCTTTCTTACCCAGAAGCAGAAGGTGGGAGAACTGAAGGATGACGACTTTGAGAA	var81	42GA19	1	0	0	43	-	-			62
CTTGAGGCCTTTCTTACCCAGAAGCAGAAGGTGGGAGAACTGTAGGATGACGACTTTGAGAA	CTTGAGGCCTTTCTTACCCAGAAGCAGAAGGTGGGAGAACTGAAGGATGACGACTTTGAGAA	var264	42TA19	1	0	0	43	-	-			62
CTTGAGGCCTTTCTTACCCAGAAGCAGAAGGTGGGAGAACTTAAGGATGACGACTTTGAGAA	CTTGAGGCCTTTCTTACCCAGAAGCAGAAGGTGGGAGAACTGAAGGATGACGACTTTGAGAA	var1051	41TG20	1	0	0	42	-	-			62
CTTGAGGCCTTTCTTACCCAGAAGCAGAAGGTGGGAGAATTGAAGGATGACGACTTTGAGAA	CTTGAGGCCTTTCTTACCCAGAAGCAGAAGGTGGGAGAACTGAAGGATGACGACTTTGAGAA	var253	39TC22	1	0	0	40	-	-			62
CTTGAGGCCTTTCTTACCCAGAAGCAGAAGGTGGGAGACCTGAAGGATGACGACTTTGAGAA	CTTGAGGCCTTTCTTACCCAGAAGCAGAAGGTGGGAGAACTGAAGGATGACGACTTTGAGAA	var369	38CA23	1	0	0	39	-	-			62
CTTGAGGCCTTTCTTACCCAGAAGCAGAAGGTGGGAGACCTGAAGGATGACGCCTTTGAGAA	CTTGAGGCCTTTCTTACCCAGAAGCAGAAGGTGGGAGAACTGAAGGATGACGACTTTGAGAA	var1369	38CA13CA9	2	0	0	39,53	-	-			62
CTTGAGGCCTTTCTTACCCAGAAGCAGAAGGTGGGAGAGCTGAAGGATGACGACTTTGAGAA	CTTGAGGCCTTTCTTACCCAGAAGCAGAAGGTGGGAGAACTGAAGGATGACGACTTTGAGAA	var84	38GA23	1	0	0	39	-	-			62
CTTGAGGCCTTTCTTACCCAGAAGCAGAAGGTGGGAGATCTGAAGGATGACGACTTTGAGAA	CTTGAGGCCTTTCTTACCCAGAAGCAGAAGGTGGGAGAACTGAAGGATGACGACTTTGAGAA	var1330	38TA23	1	0	0	39	-	-			62
CTTGAGGCCTTTCTTACCCAGAAGCAGAAGGTGGGAGCACTGAAGGATGACGACTTTGAGAA	CTTGAGGCCTTTCTTACCCAGAAGCAGAAGGTGGGAGAACTGAAGGATGACGACTTTGAGAA	var185	37CA24	1	0	0	38	-	-			62
CTTGAGGCCTTTCTTACCCAGAAGCAGAAGGTGGGAGGACTGAAGGATGACGACTTTGAGAA	CTTGAGGCCTTTCTTACCCAGAAGCAGAAGGTGGGAGAACTGAAGGATGACGACTTTGAGAA	var62	37GA24	1	0	0	38	-	-			62
CTTGAGGCCTTTCTTACCCAGAAGCAGAAGGTGGGAGTACTGAAGGATGACGACTTTGAGAA	CTTGAGGCCTTTCTTACCCAGAAGCAGAAGGTGGGAGAACTGAAGGATGACGACTTTGAGAA	var392	37TA24	1	0	0	38	-	-			62
CTTGAGGCCTTTCTTACCCAGAAGCAGAAGGTGGGATAACTGAAGGATGACGACTTTGAGAA	CTTGAGGCCTTTCTTACCCAGAAGCAGAAGGTGGGAGAACTGAAGGATGACGACTTTGAGAA	var1292	36TG25	1	0	0	37	-	-			62
CTTGAGGCCTTTCTTACCCAGAAGCAGAAGGTGGGCGAACTGAAGGATGACGACTTTGAGAA	CTTGAGGCCTTTCTTACCCAGAAGCAGAAGGTGGGAGAACTGAAGGATGACGACTTTGAGAA	var221	35CA26	1	0	0	36	-	-			62
CTTGAGGCCTTTCTTACCCAGAAGCAGAAGGTGGGGGAACTGAAGGATGACGACTTTGAGAA	CTTGAGGCCTTTCTTACCCAGAAGCAGAAGGTGGGAGAACTGAAGGATGACGACTTTGAGAA	var67	35GA26	1	0	0	36	-	-			62
CTTGAGGCCTTTCTTACCCAGAAGCAGAAGGTGGGTGAACTGAAGGATGACGACTTTGAGAA	CTTGAGGCCTTTCTTACCCAGAAGCAGAAGGTGGGAGAACTGAAGGATGACGACTTTGAGAA	var210	35TA26	1	0	0	36	-	-			62
CTTGAGGCCTTTCTTACCCAGAAGCAGAAGGTGGTAGAACTGAAGGATGACGACTTTGAGAA	CTTGAGGCCTTTCTTACCCAGAAGCAGAAGGTGGGAGAACTGAAGGATGACGACTTTGAGAA	var706	34TG27	1	0	0	35	-	-			62
CTTGAGGCCTTTCTTACCCAGAAGCAGAAGGTGTGAGAACTGAAGGATGACGACTTTGAGAA	CTTGAGGCCTTTCTTACCCAGAAGCAGAAGGTGGGAGAACTGAAGGATGACGACTTTGAGAA	var413	33TG28	1	0	0	34	-	-			62
CTTGAGGCCTTTCTTACCCAGAAGCAGAAGGTTGGAGAACTGAAGGATGACGACTTTGAGAA	CTTGAGGCCTTTCTTACCCAGAAGCAGAAGGTGGGAGAACTGAAGGATGACGACTTTGAGAA	var588	32TG29	1	0	0	33	-	-			62
CTTGAGGCCTTTCTTACCCAGAAGCAGAAGTTACCCAGAAGGTGGGAGAACTGAAGGATGAC	CTTGAGGCCTTTCTTACCCAGAAG-----------CAGAAGGTGGGAGAACTGAAGGATGAC	var546	24C-A-G-A-A-G-T-T-A-C-C-27	0	11	0	-	25,26,27,28,29,30,31,32,33,34,35	-	25		62
CTTGAGGCCTTTCTTACCCAGAAGCAGAAGTTCACCCAGAAGGTGGGAGAACTGAAGGATGA	CTTGAGGCCTTTCTTACCCAGAAG------------CAGAAGGTGGGAGAACTGAAGGATGA	var1459	24C-A-G-A-A-G-T-T-C-A-C-C-26	0	12	0	-	25,26,27,28,29,30,31,32,33,34,35,36	-	25		62
CTTGAGGCCTTTCTTACCCAGAAGCAGAAGTTCTCCCAGAAGGTGGGAGAACTGAAGGATGA	CTTGAGGCCTTTCTTACCCAGAAG------------CAGAAGGTGGGAGAACTGAAGGATGA	var1195	24C-A-G-A-A-G-T-T-C-T-C-C-26	0	12	0	-	25,26,27,28,29,30,31,32,33,34,35,36	-	25		62
CTTGAGGCCTTTCTTACCCAGAAGCAGAAGTTGGGAGAACTGAAGGATGACGACTTTGAGAA	CTTGAGGCCTTTCTTACCCAGAAGCAGAAGGTGGGAGAACTGAAGGATGACGACTTTGAGAA	var164	30TG31	1	0	0	31	-	-			62
CTTGAGGCCTTTCTTACCCAGAAGCAGAATAGGTGGGAGAACTGAAGGATGACGACTTTGAG	CTTGAGGCCTTTCTTACCCAGAAGCAGAA--GGTGGGAGAACTGAAGGATGACGACTTTGAG	var1415	29T-A-31	0	2	0	-	30,31	-	30		62
CTTGAGGCCTTTCTTACCCAGAAGCAGAATGGTGGGAGAACTGAAGGATGACGACTTTGAGA	CTTGAGGCCTTTCTTACCCAGAAGCAGAA-GGTGGGAGAACTGAAGGATGACGACTTTGAGA	var1408	29T-32	0	1	0	-	30	-	30		62
CTTGAGGCCTTTCTTACCCAGAAGCAGAATGTGGGAGAACTGAAGGATGACGACTTTGAGAA	CTTGAGGCCTTTCTTACCCAGAAGCAGAAGGTGGGAGAACTGAAGGATGACGACTTTGAGAA	var890	29TG32	1	0	0	30	-	-			62
CTTGAGGCCTTTCTTACCCAGAAGCAGAC--TGGGAGAACTGAAGGATGACGACTTTGAGAA	CTTGAGGCCTTTCTTACCCAGAAGCAGAAGGTGGGAGAACTGAAGGATGACGACTTTGAGAA	var787	28CA-G-G31	1	0	2	29	-	30,31		30	62
CTTGAGGCCTTTCTTACCCAGAAGCAGACAAGGTGGGAGAACTGAAGGATGACGACTTTGAG	CTTGAGGCCTTTCTTACCCAGAAGCAGA--AGGTGGGAGAACTGAAGGATGACGACTTTGAG	var267	28C-A-32	0	2	0	-	29,30	-	29		62
CTTGAGGCCTTTCTTACCCAGAAGCAGACAGAAGGTGGGAGAACTGAAGGATGACGACTTTG	CTTGAGGCCTTTCTTACCCAGAAGCAGA----AGGTGGGAGAACTGAAGGATGACGACTTTG	var143	28C-A-G-A-30	0	4	0	-	29,30,31,32	-	29		62
CTTGAGGCCTTTCTTACCCAGAAGCAGACAGGAGGGAGAACTGAAGGATGACGACTTTGAGA	CTTGAGGCCTTTCTTACCCAGAAGCAGA-AGGTGGGAGAACTGAAGGATGACGACTTTGAGA	var847	28C-3AT29	1	1	0	33	29	-	29		62
CTTGAGGCCTTTCTTACCCAGAAGCAGACAGGGGGGAGAACTGAAGGATGACGACTTTGAGA	CTTGAGGCCTTTCTTACCCAGAAGCAGA-AGGTGGGAGAACTGAAGGATGACGACTTTGAGA	var1639	28C-3GT29	1	1	0	33	29	-	29		62
CTTGAGGCCTTTCTTACCCAGAAGCAGACAGGTGGGAGAACTGAAGGATGACGACTTTGAGA	CTTGAGGCCTTTCTTACCCAGAAGCAGA-AGGTGGGAGAACTGAAGGATGACGACTTTGAGA	var13	28C-33	0	1	0	-	29	-	29		62
CTTGAGGCCTTTCTTACCCAGAAGCAGACG--------ACTGAAGGATGACGACTTTGAGAA	CTTGAGGCCTTTCTTACCCAGAAGCAGAAGGTGGGAGAACTGAAGGATGACGACTTTGAGAA	var1214	28CA1-G-T-G-G-G-A-G-A24	1	0	8	29	-	31,32,33,34,35,36,37,38		31	62
CTTGAGGCCTTTCTTACCCAGAAGCAGACGG	CTTGAGGCCTTTCTTACCCAGAAGCAGAAGG	var1567	28CA2	1	0	0	29	-	-			31
CTTGAGGCCTTTCTTACCCAGAAGCAGACGGTGGGAGAACTGAAGGATGACGACTTTGAGAA	CTTGAGGCCTTTCTTACCCAGAAGCAGAAGGTGGGAGAACTGAAGGATGACGACTTTGAGAA	var116	28CA33	1	0	0	29	-	-			62
CTTGAGGCCTTTCTTACCCAGAAGCAGACTG-GGTATGACTGAAGGATGACGACTTTGAGAA	CTTGAGGCCTTTCTTACCCAGAAGCAGAAGGTGGGAGAACTGAAGGATGACGACTTTGAGAA	var1355	28CATG1-T2TG1TGGA24	5	0	1	29,30,35,37,38	-	32		32	62
CTTGAGGCCTTTCTTACCCAGAAGCAGACTGAACTGAAGGATGGGAGAACTGAAGGATGACG	CTTGAGGCCTTTCTTACCCAGAAGCA---------GAAGG-TGGGAGAACTGAAGGATGACG	var1660	26G-A-C-T-G-A-A-C-T-5A-21	0	10	0	-	27,28,29,30,31,32,33,34,35,41	-	27		62
CTTGAGGCCTTTCTTACCCAGAAGCAGACTGAAGGTGGGAGAACTGAAGGATGACGACTTTG	CTTGAGGCCTTTCTTACCCAGAAGCAGA----AGGTGGGAGAACTGAAGGATGACGACTTTG	var1579	28C-T-G-A-30	0	4	0	-	29,30,31,32	-	29		62
CTTGAGGCCTTTCTTACCCAGAAGCAGAGAAAGGTGGGAGAACTGAAGGATGACGACTTTGA	CTTGAGGCCTTTCTTACCCAGAAGCAGA---AGGTGGGAGAACTGAAGGATGACGACTTTGA	var1147	28G-A-A-31	0	3	0	-	29,30,31	-	29		62
CTTGAGGCCTTTCTTACCCAGAAGCAGAGAACAGGTGGGAGAACTGAAGGATGACGACTTTG	CTTGAGGCCTTTCTTACCCAGAAGCAGA----AGGTGGGAGAACTGAAGGATGACGACTTTG	var1615	28G-A-A-C-30	0	4	0	-	29,30,31,32	-	29		62
CTTGAGGCCTTTCTTACCCAGAAGCAGAGAACCAGGTGGGAGAACTGAAGGATGACGACTTT	CTTGAGGCCTTTCTTACCCAGAAGCAGA-----AGGTGGGAGAACTGAAGGATGACGACTTT	var630	28G-A-A-C-C-29	0	5	0	-	29,30,31,32,33	-	29		62
CTTGAGGCCTTTCTTACCCAGAAGCAGAGAACCCAGGTGGGAGAACTGAAGGATGACGACTT	CTTGAGGCCTTTCTTACCCAGAAGCAGA------AGGTGGGAGAACTGAAGGATGACGACTT	var901	28G-A-A-C-C-C-28	0	6	0	-	29,30,31,32,33,34	-	29		62
CTTGAGGCCTTTCTTACCCAGAAGCAGAGAACT----GAACTGAAGGATGACGACTTTGAGAA	CTTGAGGCCTTTCTTACCCAGAAGCAGA-AGGTGGGAGAACTGAAGGATGACGACTTTGAGAA	var1229	28G-1AGCG1-G-G-G-A26	2	1	0	31,32	29	-	29		63
CTTGAGGCCTTTCTTACCCAGAAGCAGAGAACTCCCAGGTGGGAGAACTGAAGGATGACGAC	CTTGAGGCCTTTCTTACCCAGAAGCAGA--------AGGTGGGAGAACTGAAGGATGACGAC	var1222	28G-A-A-C-T-C-C-C-26	0	8	0	-	29,30,31,32,33,34,35,36	-	29		62
CTTGAGGCCTTTCTTACCCAGAAGCAGAGAACTGAAGAACTGAAGGATGACGACTTTGAGAA	CTTGAGGCCTTTCTTACCCAGAAGCAGAAGGTGGGAGAACTGAAGGATGACGACTTTGAGAA	var1659	28GAAGAGCTTG1AG27	6	0	0	29,30,31,32,33,35	-	-			62
CTTGAGGCCTTTCTTACCCAGAAGCAGAGAACTGAAGGATGGGAGAACTGAAGGATGACGAC	CTTGAGGCCTTTCTTACCCAGAAGCA-------GAAGG-TGGGAGAACTGAAGGATGACGAC	var165	26G-A-G-A-A-C-T-5A-23	0	8	0	-	27,28,29,30,31,32,33,39	-	27		62
CTTGAGGCCTTTCTTACCCAGAAGCAGAGAACTGAAGGATGTGGGAGAACTGAAGGATGACG	CTTGAGGCCTTTCTTACCCAGAAGCAGA----------AGGTGGGAGAACTGAAGGATGACG	var1194	28G-A-A-C-T-G-A-A-G-G-1TG22	1	10	0	40	29,30,31,32,33,34,35,36,37,38	-	29		62
CTTGAGGCCTTTCTTACCCAGAAGCAGAGAACTGAAGGGAGAACTGAAGGATGACGACTTTG	CTTGAGGCCTTTCTTACCCAGAAGCAGA----AGGTGGGAGAACTGAAGGATGACGACTTTG	var840	28G-A-A-C-TA1AGAT26	3	4	0	33,35,36	29,30,31,32	-	29		62
CTTGAGGCCTTTCTTACCCAGAAGCAGAGAACTGAAGGTGGGAGAACTGAAGGATGACGACT	CTTGAGGCCTTTCTTACCCAGAAGCAGA-------AGGTGGGAGAACTGAAGGATGACGACT	var100	28G-A-A-C-T-G-A-27	0	7	0	-	29,30,31,32,33,34,35	-	29		62
CTTGAGGCCTTTCTTACCCAGAAGCAGAGAACTGAAGTGGGAGAACTGAAGGATGACGACTT	CTTGAGGCCTTTCTTACCCAGAAGCAGA------AGGTGGGAGAACTGAAGGATGACGACTT	var524	28G-A-A-C-T-G-1AG26	1	6	0	36	29,30,31,32,33,34	-	29		62
CTTGAGGCCTTTCTTACCCAGAAGCAGAGAACTGAAGTGTGGAGAGAACTGAAGGATGACGA	CTTGAGGCCTTTCTTACCCAGAAGCA-------GAAG-GTGG-GAGAACTGAAGGATGACGA	var670	26G-A-G-A-A-C-T-4T-4A-19	0	9	0	-	27,28,29,30,31,32,33,38,43	-	27		62
CTTGAGGCCTTTCTTACCCAGAAGCAGAGAACTGCTTACCCAGGTGGGAGAACTGAAGGATG	CTTGAGGCCTTTCTTACCCAGAAGCAGA-------------AGGTGGGAGAACTGAAGGATG	var628	28G-A-A-C-T-G-C-T-T-A-C-C-C-21	0	13	0	-	29,30,31,32,33,34,35,36,37,38,39,40,41	-	29		62
CTTGAGGCCTTTCTTACCCAGAAGCAGAGAACTGCTTCTGGTGGGAGAACTGAAGGATGACG	CTTGAGGCCTTTCTTACCCAGAAGCAGA----------AGGTGGGAGAACTGAAGGATGACG	var1310	28G-A-A-C-T-G-C-T-T-C-TA23	1	10	0	39	29,30,31,32,33,34,35,36,37,38	-	29		62
CTTGAGGCCTTTCTTACCCAGAAGCAGAGAACTGGGAGAACTGAAGGATGACGACTTTGAGA	CTTGAGGCCTTTCTTACCCAGAAGCAGA-AGGTGGGAGAACTGAAGGATGACGACTTTGAGA	var288	28G-1AGCG30	2	1	0	31,32	29	-	29		62
CTTGAGGCCTTTCTTACCCAGAAGCAGAGAACTGGTAGCAGGTGGGAGAACTGAAGGATGAC	CTTGAGGCCTTTCTTACCCAGAAGCAGA-----------AGGTGGGAGAACTGAAGGATGAC	var498	28G-A-A-C-T-G-G-T-A-G-C-23	0	11	0	-	29,30,31,32,33,34,35,36,37,38,39	-	29		62
CTTGAGGCCTTTCTTACCCAGAAGCAGAGAACTGGTGGGAGAACTGAAGGATGACGACTTTG	CTTGAGGCCTTTCTTACCCAGAAGCAGAA----GGTGGGAGAACTGAAGGATGACGACTTTG	var573	28GAA-A-C-T-29	1	4	0	29	30,31,32,33	-	30		62
CTTGAGGCCTTTCTTACCCAGAAGCAGAGAACTGTGGGAGAACTGAAGGATGACGACTTTGA	CTTGAGGCCTTTCTTACCCAGAAGCAGAAG---GTGGGAGAACTGAAGGATGACGACTTTGA	var1354	28GAAGA-C-T-29	2	3	0	29,30	31,32,33	-	31		62
CTTGAGGCCTTTCTTACCCAGAAGCAGAGAACTTACCCAGAAGGTGGGAGAACTGAAGGATG	CTTGAGGCCTTTCTTACCCAGAAG-------------CAGAAGGTGGGAGAACTGAAGGATG	var1417	24C-A-G-A-G-A-A-C-T-T-A-C-C-25	0	13	0	-	25,26,27,28,29,30,31,32,33,34,35,36,37	-	25		62
CTTGAGGCCTTTCTTACCCAGAAGCAGAGAACTTACCCAGGTGGGAGAACTGAAGGATGACG	CTTGAGGCCTTTCTTACCCAGAAGCAGA----------AGGTGGGAGAACTGAAGGATGACG	var1400	28G-A-A-C-T-T-A-C-C-C-24	0	10	0	-	29,30,31,32,33,34,35,36,37,38	-	29		62
CTTGAGGCCTTTCTTACCCAGAAGCAGAGAACTTCAGGTGGGAGAACTGAAGGATGACGACT	CTTGAGGCCTTTCTTACCCAGAAGCAGA-------AGGTGGGAGAACTGAAGGATGACGACT	var606	28G-A-A-C-T-T-C-27	0	7	0	-	29,30,31,32,33,34,35	-	29		62
CTTGAGGCCTTTCTTACCCAGAAGCAGAGAAGAAGGTGGGAGAACTGAAGGATGACGACTTT	CTTGAGGCCTTTCTTACCCAGAAGCAGA-----AGGTGGGAGAACTGAAGGATGACGACTTT	var930	28G-A-A-G-A-29	0	5	0	-	29,30,31,32,33	-	29		62
CTTGAGGCCTTTCTTACCCAGAAGCAGAGAAGGTGGGAGAACTGAAGGATGACGACTTTGAG	CTTGAGGCCTTTCTTACCCAGAAGCAGA--AGGTGGGAGAACTGAAGGATGACGACTTTGAG	var105	28G-A-32	0	2	0	-	29,30	-	29		62
CTTGAGGCCTTTCTTACCCAGAAGCAGAGAAGTGGGAGAACTGAAGGATGACGACTTTGAGA	CTTGAGGCCTTTCTTACCCAGAAGCAGA-AGGTGGGAGAACTGAAGGATGACGACTTTGAGA	var1034	28G-1AG31	1	1	0	31	29	-	29		62
CTTGAGGCCTTTCTTACCCAGAAGCAGAGAGAACTGAAGGATGGGAGAACTGAAGGATGACG	CTTGAGGCCTTTCTTACCCAGAAGCA---------GAAGG-TGGGAGAACTGAAGGATGACG	var1425	26G-A-G-A-G-A-A-C-T-5A-21	0	10	0	-	27,28,29,30,31,32,33,34,35,41	-	27		62
CTTGAGGCCTTTCTTACCCAGAAGCAGAGAGAACTTACTCTCTCTGGGAGAACTGAAGGATG	CTTGAGGCCTTTCTTACCCAGAAGCAGA-AG------------GTGGGAGAACTGAAGGATG	var470	28G-2A-A-C-T-T-A-C-T-C-T-C-T-CG18	1	13	0	44	29,32,33,34,35,36,37,38,39,40,41,42,43	-	29		62
CTTGAGGCCTTTCTTACCCAGAAGCAGAGAGAAGGTGGGAGAACTGAAGGATGACGACTTTG	CTTGAGGCCTTTCTTACCCAGAAGCAGA----AGGTGGGAGAACTGAAGGATGACGACTTTG	var691	28G-A-G-A-30	0	4	0	-	29,30,31,32	-	29		62
CTTGAGGCCTTTCTTACCCAGAAGCAGAGAGAGGTGGGAGAACTGAAGGATGACGACTTTGA	CTTGAGGCCTTTCTTACCCAGAAGCAGA---AGGTGGGAGAACTGAAGGATGACGACTTTGA	var487	28G-A-G-31	0	3	0	-	29,30,31	-	29		62
CTTGAGGCCTTTCTTACCCAGAAGCAGAGAGGAGGGAGAACTGAAGGATGACGACTTTGAGA	CTTGAGGCCTTTCTTACCCAGAAGCAGA-AGGTGGGAGAACTGAAGGATGACGACTTTGAGA	var1228	28G-3AT29	1	1	0	33	29	-	29		62
CTTGAGGCCTTTCTTACCCAGAAGCAGAGAGGTGGGAGAACTGAAGGATGACGACTTTGAGA	CTTGAGGCCTTTCTTACCCAGAAGCAGA-AGGTGGGAGAACTGAAGGATGACGACTTTGAGA	var20	28G-33	0	1	0	-	29	-	29		62
CTTGAGGCCTTTCTTACCCAGAAGCAGAGAGTGGGAGAACTGAAGGATGACGACTTTGAGAA	CTTGAGGCCTTTCTTACCCAGAAGCAGAAGGTGGGAGAACTGAAGGATGACGACTTTGAGAA	var634	28GAAG32	2	0	0	29,30	-	-			62
CTTGAGGCCTTTCTTACCCAGAAGCAGAGATGTGGGAGAACTGAAGGATGACGACTTTGAGA	CTTGAGGCCTTTCTTACCCAGAAGCAGA-AGGTGGGAGAACTGAAGGATGACGACTTTGAGA	var823	28G-1TG31	1	1	0	31	29	-	29		62
CTTGAGGCCTTTCTTACCCAGAAGCAGAGCAGTGGGAGAACTGAAGGATGACGACTTTGAGA	CTTGAGGCCTTTCTTACCCAGAAGCAGAAG-GTGGGAGAACTGAAGGATGACGACTTTGAGA	var1221	28GACGA-31	2	1	0	29,30	31	-	31		62
CTTGAGGCCTTTCTTACCCAGAAGCAGAGGAGGTGGGAGAACTGAAGGATGACGACTTTGAG	CTTGAGGCCTTTCTTACCCAGAAGCAGA--AGGTGGGAGAACTGAAGGATGACGACTTTGAG	var796	28G-G-32	0	2	0	-	29,30	-	29		62
CTTGAGGCCTTTCTTACCCAGAAGCAGAGGCCTTTCTTACCCAGGTGGGAGAACTGAAGGAT	CTTGAGGCCTTTCTTACCCAGAAGCAGA--------------AGGTGGGAGAACTGAAGGAT	var355	28G-G-C-C-T-T-T-C-T-T-A-C-C-C-20	0	14	0	-	29,30,31,32,33,34,35,36,37,38,39,40,41,42	-	29		62
CTTGAGGCCTTTCTTACCCAGAAGCAGAGGG	CTTGAGGCCTTTCTTACCCAGAAGCAGAAGG	var1640	28GA2	1	0	0	29	-	-			31
CTTGAGGCCTTTCTTACCCAGAAGCAGAGGG--GGAGAACTGAAGGATGACGACTTTGAGAA	CTTGAGGCCTTTCTTACCCAGAAGCAGAAGGTGGGAGAACTGAAGGATGACGACTTTGAGAA	var1384	28GA2-T-G29	1	0	2	29	-	32,33		32	62
CTTGAGGCCTTTCTTACCCAGAAGCAGAGGGGTGGGAGAACTGAAGGATGACGACTTTGAGA	CTTGAGGCCTTTCTTACCCAGAAGCAGAAGG-TGGGAGAACTGAAGGATGACGACTTTGAGA	var908	28GA2G-30	1	1	0	29	32	-	32		62
CTTGAGGCCTTTCTTACCCAGAAGCAGAGGGTGGGAGAACTGAAGGATGACGACTTTGAGAA	CTTGAGGCCTTTCTTACCCAGAAGCAGAAGGTGGGAGAACTGAAGGATGACGACTTTGAGAA	var28	28GA33	1	0	0	29	-	-			62
CTTGAGGCCTTTCTTACCCAGAAGCAGAGTAAGGTGGGAGAACTGAAGGATGACGACTTTGA	CTTGAGGCCTTTCTTACCCAGAAGCAGA---AGGTGGGAGAACTGAAGGATGACGACTTTGA	var696	28G-T-A-31	0	3	0	-	29,30,31	-	29		62
CTTGAGGCCTTTCTTACCCAGAAGCAGAGTAAGTGGGAGAACTGAAGGATGACGACTTTGAG	CTTGAGGCCTTTCTTACCCAGAAGCAGA--AGGTGGGAGAACTGAAGGATGACGACTTTGAG	var1540	28G-T-1AG30	1	2	0	32	29,30	-	29		62
CTTGAGGCCTTTCTTACCCAGAAGCAGAT--TGGGAGAACTGAAGGATGACGACTTTGAGAA	CTTGAGGCCTTTCTTACCCAGAAGCAGAAGGTGGGAGAACTGAAGGATGACGACTTTGAGAA	var1308	28TA-G-G31	1	0	2	29	-	30,31		30	62
CTTGAGGCCTTTCTTACCCAGAAGCAGATAAAGGTGGGAGAACTGAAGGATGACGACTTTGA	CTTGAGGCCTTTCTTACCCAGAAGCAGA---AGGTGGGAGAACTGAAGGATGACGACTTTGA	var543	28T-A-A-31	0	3	0	-	29,30,31	-	29		62
CTTGAGGCCTTTCTTACCCAGAAGCAGATAAGGTGGGAGAACTGAAGGATGACGACTTTGAG	CTTGAGGCCTTTCTTACCCAGAAGCAGA--AGGTGGGAGAACTGAAGGATGACGACTTTGAG	var286	28T-A-32	0	2	0	-	29,30	-	29		62
CTTGAGGCCTTTCTTACCCAGAAGCAGATAGGAGGGAGAACTGAAGGATGACGACTTTGAGA	CTTGAGGCCTTTCTTACCCAGAAGCAGA-AGGTGGGAGAACTGAAGGATGACGACTTTGAGA	var1568	28T-3AT29	1	1	0	33	29	-	29		62
CTTGAGGCCTTTCTTACCCAGAAGCAGATAGGTGGGAGAACTGAAGGATGACGACTTTGAGA	CTTGAGGCCTTTCTTACCCAGAAGCAGA-AGGTGGGAGAACTGAAGGATGACGACTTTGAGA	var25	28T-33	0	1	0	-	29	-	29		62
CTTGAGGCCTTTCTTACCCAGAAGCAGATG--------ACTGAAGGATGACGACTTTGAGAA	CTTGAGGCCTTTCTTACCCAGAAGCAGAAGGTGGGAGAACTGAAGGATGACGACTTTGAGAA	var822	28TA1-G-T-G-G-G-A-G-A24	1	0	8	29	-	31,32,33,34,35,36,37,38		31	62
CTTGAGGCCTTTCTTACCCAGAAGCAGATGAAAGTGGGAGAACTGAAGGATGACGACTTTGA	CTTGAGGCCTTTCTTACCCAGAAGCAGAAG---GTGGGAGAACTGAAGGATGACGACTTTGA	var1283	28TA1A-A-A-29	1	3	0	29	31,32,33	-	31		62
CTTGAGGCCTTTCTTACCCAGAAGCAGATGAAGGTGGGAGAACTGAAGGATGACGACTTTGA	CTTGAGGCCTTTCTTACCCAGAAGCAGA---AGGTGGGAGAACTGAAGGATGACGACTTTGA	var1578	28T-G-A-31	0	3	0	-	29,30,31	-	29		62
CTTGAGGCCTTTCTTACCCAGAAGCAGATGACGACTTTGACTGAAGGATGACGACTTTGAGA	CTTGAGGCCTTTCTTACCCAGAAGCAGAAGGTG-GGAGAACTGAAGGATGACGACTTTGAGA	var1613	28TA1AGCT1A-CGTGTATGGA23	8	1	0	29,31,32,35,36,37,38,39	34	-	34		62
CTTGAGGCCTTTCTTACCCAGAAGCAGATGG	CTTGAGGCCTTTCTTACCCAGAAGCAGAAGG	var1423	28TA2	1	0	0	29	-	-			31
CTTGAGGCCTTTCTTACCCAGAAGCAGATGG	CTTGAGGCCTTTCTTACCCAGAAGCAGAAGG	var885	28TA2	1	0	0	29	-	-			31
CTTGAGGCCTTTCTTACCCAGAAGCAGATGGGTGGGAGAACTGAAGGATGACGACTTTGAGA	CTTGAGGCCTTTCTTACCCAGAAGCAGAAGG-TGGGAGAACTGAAGGATGACGACTTTGAGA	var1082	28TA2G-30	1	1	0	29	32	-	32		62
CTTGAGGCCTTTCTTACCCAGAAGCAGATGGTGGGAGAACTGAAGGATGACGACTTTGAGAA	CTTGAGGCCTTTCTTACCCAGAAGCAGAAGGTGGGAGAACTGAAGGATGACGACTTTGAGAA	var103	28TA33	1	0	0	29	-	-			62
CTTGAGGCCTTTCTTACCCAGAAGCAGATTAAGGTGGGAGAACTGAAGGATGACGACTTTGA	CTTGAGGCCTTTCTTACCCAGAAGCAGA---AGGTGGGAGAACTGAAGGATGACGACTTTGA	var1193	28T-T-A-31	0	3	0	-	29,30,31	-	29		62
CTTGAGGCCTTTCTTACCCAGAAGCAGATTAGGTGGGAGAACTGAAGGATGACGACTTTGAG	CTTGAGGCCTTTCTTACCCAGAAGCAGA--AGGTGGGAGAACTGAAGGATGACGACTTTGAG	var412	28T-T-32	0	2	0	-	29,30	-	29		62
CTTGAGGCCTTTCTTACCCAGAAGCAGATTCAGGTGGGAGAACTGAAGGATGACGACTTTGA	CTTGAGGCCTTTCTTACCCAGAAGCAGA---AGGTGGGAGAACTGAAGGATGACGACTTTGA	var814	28T-T-C-31	0	3	0	-	29,30,31	-	29		62
CTTGAGGCCTTTCTTACCCAGAAGCAGATTCTGGTGGGAGAACTGAAGGATGACGACTTTGA	CTTGAGGCCTTTCTTACCCAGAAGCAGAA---GGTGGGAGAACTGAAGGATGACGACTTTGA	var795	28TAT-C-T-30	1	3	0	29	30,31,32	-	30		62
CTTGAGGCCTTTCTTACCCAGAAGCAGC---TGGGAGAACTGAAGGATGACGACTTTGAGAA	CTTGAGGCCTTTCTTACCCAGAAGCAGAAGGTGGGAGAACTGAAGGATGACGACTTTGAGAA	var1271	27CA-A-G-G31	1	0	3	28	-	29,30,31		29	62
CTTGAGGCCTTTCTTACCCAGAAGCAGC-GGTGGGAGAACTGAAGGATGACGACTTTGAGAA	CTTGAGGCCTTTCTTACCCAGAAGCAGAAGGTGGGAGAACTGAAGGATGACGACTTTGAGAA	var1107	27CA-A33	1	0	1	28	-	29		29	62
CTTGAGGCCTTTCTTACCCAGAAGCAGCAAGGTGGGAGAACTGAAGGATGACGACTTTGAGA	CTTGAGGCCTTTCTTACCCAGAAGCAG-AAGGTGGGAGAACTGAAGGATGACGACTTTGAGA	var407	27C-34	0	1	0	-	28	-	28		62
CTTGAGGCCTTTCTTACCCAGAAGCAGCAGAAGGTGGGAGAACTGAAGGATGACGACTTTGA	CTTGAGGCCTTTCTTACCCAGAAGCA---GAAGGTGGGAGAACTGAAGGATGACGACTTTGA	var753	26G-C-A-33	0	3	0	-	27,28,29	-	27		62
CTTGAGGCCTTTCTTACCCAGAAGCAGCAGGAGGGAGAACTGAAGGATGACGACTTTGAGAA	CTTGAGGCCTTTCTTACCCAGAAGCAGAAGGTGGGAGAACTGAAGGATGACGACTTTGAGAA	var1623	27CA3AT30	2	0	0	28,32	-	-			62
CTTGAGGCCTTTCTTACCCAGAAGCAGCAGGTGGGAGAACTGAAGGATGACGACTTTGAGAA	CTTGAGGCCTTTCTTACCCAGAAGCAGAAGGTGGGAGAACTGAAGGATGACGACTTTGAGAA	var54	27CA34	1	0	0	28	-	-			62
CTTGAGGCCTTTCTTACCCAGAAGCAGCAGTGAGAACTTCAGTGAGAACTGAAGGATGACGA	CTTGAGGCCTTTCTTACCCAGAAGCAGAAG---------GTGGGAGAACTGAAGGATGACGA	var813	27CA2T-G-A-G-A-A-C-T-T-CGAT1TG19	4	9	0	28,40,41,43	31,32,33,34,35,36,37,38,39	-	31		62
CTTGAGGCCTTTCTTACCCAGAAGCAGCT--TGAGAGAACTGAAGGATGACGACTTTGAGAA	CTTGAGGCCTTTCTTACCCAGAAGCAGAAGGTGGGAGAACTGAAGGATGACGACTTTGAGAA	var980	27CATA-G-G2AG28	3	0	2	28,29,32	-	30,31		30	62
CTTGAGGCCTTTCTTACCCAGAAGCAGCTTCTGGGAGAACTGAAGGATGACGACTTTGAGAA	CTTGAGGCCTTTCTTACCCAGAAGCAGAAGGTGGGAGAACTGAAGGATGACGACTTTGAGAA	var981	27CATATGCG31	4	0	0	28,29,30,31	-	-			62
CTTGAGGCCTTTCTTACCCAGAAGCAGCTTCTTCTGCAAGAACTGAAGGATGACGACTTTGA	CTTGAGGCCTTTCTTACCCAGAAGCAG---AAGGTGGGAGAACTGAAGGATGACGACTTTGA	var1044	27C-T-T-CATATGCG2CGAG24	6	3	0	31,32,33,34,37,38	28,29,30	-	28		62
CTTGAGGCCTTTCTTACCCAGAAGCAGCTTGTGGGAGAACTGAAGGATGACGACTTTGAGAA	CTTGAGGCCTTTCTTACCCAGAAGCAGAAGGTGGGAGAACTGAAGGATGACGACTTTGAGAA	var1138	27CATATG32	3	0	0	28,29,30	-	-			62
CTTGAGGCCTTTCTTACCCAGAAGCAGG----GAGAGAACTGAAGGATGACGACTTTGAGAA	CTTGAGGCCTTTCTTACCCAGAAGCAGAAGGTGGGAGAACTGAAGGATGACGACTTTGAGAA	var1573	27GA-A-G-G-T1AG28	2	0	4	28,33	-	29,30,31,32		29	62
CTTGAGGCCTTTCTTACCCAGAAGCAGG-GGTGGGAGAACTGAAGGATGACGACTTTGAGAA	CTTGAGGCCTTTCTTACCCAGAAGCAGAAGGTGGGAGAACTGAAGGATGACGACTTTGAGAA	var565	27GA-A33	1	0	1	28	-	29		29	62
CTTGAGGCCTTTCTTACCCAGAAGCAGGA--TGGGAGAACTGAAGGATGACGACTTTGAGAA	CTTGAGGCCTTTCTTACCCAGAAGCAGAAGGTGGGAGAACTGAAGGATGACGACTTTGAGAA	var680	27GA1-G-G31	1	0	2	28	-	30,31		30	62
CTTGAGGCCTTTCTTACCCAGAAGCAGGAAG-CAGTCTTCTGAAGGATGACGACTTTGAGAA	CTTGAGGCCTTTCTTACCCAGAAGCAGAAGGTGGGAGAACTGAAGGATGACGACTTTGAGAA	var955	27GA1AG1-TCGAG1TACGTATA23	8	0	1	28,30,33,34,36,37,38,39	-	32		32	62
CTTGAGGCCTTTCTTACCCAGAAGCAGGAAGGTGGGAGAACTGAAGGATGACGACTTTGAGA	CTTGAGGCCTTTCTTACCCAGAAGCAG-AAGGTGGGAGAACTGAAGGATGACGACTTTGAGA	var159	27G-34	0	1	0	-	28	-	28		62
CTTGAGGCCTTTCTTACCCAGAAGCAGGAG	CTTGAGGCCTTTCTTACCCAGAAGCAGAAG	var850	27GA2	1	0	0	28	-	-			30
CTTGAGGCCTTTCTTACCCAGAAGCAGGAG-----AGAACTGAAGGATGACGACTTTGAGAA	CTTGAGGCCTTTCTTACCCAGAAGCAGAAGGTGGGAGAACTGAAGGATGACGACTTTGAGAA	var1566	27GA2-G-T-G-G-G27	1	0	5	28	-	31,32,33,34,35		31	62
CTTGAGGCCTTTCTTACCCAGAAGCAGGAGAAAGTGGGAGAACTGAAGGATGACGACTTTGA	CTTGAGGCCTTTCTTACCCAGAAGCAGAAG---GTGGGAGAACTGAAGGATGACGACTTTGA	var545	27GA2A-A-A-29	1	3	0	28	31,32,33	-	31		62
CTTGAGGCCTTTCTTACCCAGAAGCAGGAGAACTGAAGGTGGGAGAACTGAAGGATGACGAC	CTTGAGGCCTTTCTTACCCAGAAGCAG--------AAGGTGGGAGAACTGAAGGATGACGAC	var211	27G-A-G-A-A-C-T-G-27	0	8	0	-	28,29,30,31,32,33,34,35	-	28		62
CTTGAGGCCTTTCTTACCCAGAAGCAGGAGG---GAGAACTGAAGGATGACGACTTTGAGAA	CTTGAGGCCTTTCTTACCCAGAAGCAGAAGGTGGGAGAACTGAAGGATGACGACTTTGAGAA	var60	27GA3-T-G-G28	1	0	3	28	-	32,33,34		32	62
CTTGAGGCCTTTCTTACCCAGAAGCAGGAGG---GAGAACTGCAGGATGACGACTTTGAGAA	CTTGAGGCCTTTCTTACCCAGAAGCAGAAGGTGGGAGAACTGAAGGATGACGACTTTGAGAA	var897	27GA3-T-G-G8CA19	2	0	3	28,43	-	32,33,34		32	62
CTTGAGGCCTTTCTTACCCAGAAGCAGGAGG---GCGAACTGAAGGATGACGACTTTGAGAA	CTTGAGGCCTTTCTTACCCAGAAGCAGAAGGTGGGAGAACTGAAGGATGACGACTTTGAGAA	var1644	27GA3-T-G-G1CA26	2	0	3	28,36	-	32,33,34		32	62
CTTGAGGCCTTTCTTACCCAGAAGCAGGAGGGTGGGAGAACTGAAGGATGACGACTTTGAGA	CTTGAGGCCTTTCTTACCCAGAAGCAGAAGG-TGGGAGAACTGAAGGATGACGACTTTGAGA	var963	27GA3G-30	1	1	0	28	32	-	32		62
CTTGAGGCCTTTCTTACCCAGAAGCAGGAGGTGGGAGAACTGAAGGATGACGACTTTGAGAA	CTTGAGGCCTTTCTTACCCAGAAGCAGAAGGTGGGAGAACTGAAGGATGACGACTTTGAGAA	var43	27GA34	1	0	0	28	-	-			62
CTTGAGGCCTTTCTTACCCAGAAGCAGGCCTCAAGGTGGGAGAACTGAAGGATGACGACTTT	CTTGAGGCCTTTCTTACCCAGAAGCAG-----AAGGTGGGAGAACTGAAGGATGACGACTTT	var1457	27G-C-C-T-C-30	0	5	0	-	28,29,30,31,32	-	28		62
CTTGAGGCCTTTCTTACCCAGAAGCAGGCCTCTGGGTAAGAGAACTGAAGGATGACGACTTT	CTTGAGGCCTTTCTTACCCAGAAGCAG-----AAGGTGGGAGAACTGAAGGATGACGACTTT	var954	27G-C-C-T-C-TAGA3AGAG23	4	5	0	33,34,38,39	28,29,30,31,32	-	28		62
CTTGAGGCCTTTCTTACCCAGAAGCAGGCCTTTCTCCCAGGTGGGAGAACTGAAGGATGACG	CTTGAGGCCTTTCTTACCCAGAAGCAG----------AAGGTGGGAGAACTGAAGGATGACG	var807	27G-C-C-T-T-T-C-T-C-C-CA24	1	10	0	38	28,29,30,31,32,33,34,35,36,37	-	28		62
CTTGAGGCCTTTCTTACCCAGAAGCAGGCCTTTCTTACCCAGGTGGGAGAACTGAAGGATGA	CTTGAGGCCTTTCTTACCCAGAAGCAG------------AAGGTGGGAGAACTGAAGGATGA	var269	27G-C-C-T-T-T-C-T-T-A-C-C-CA22	1	12	0	40	28,29,30,31,32,33,34,35,36,37,38,39	-	28		62
CTTGAGGCCTTTCTTACCCAGAAGCAGGGACTGAAGCAGGTGGGAGAACTGAAGGATGACGA	CTTGAGGCCTTTCTTACCCAGAAGC---------AGAAGGTGGGAGAACTGAAGGATGACGA	var1166	25A-G-G-G-A-C-T-G-A-2CA25	1	9	0	37	26,27,28,29,30,31,32,33,34	-	26		62
CTTGAGGCCTTTCTTACCCAGAAGCAGGTAAGAAAGGTGGGAGAACTGAAGGATGACGACTT	CTTGAGGCCTTTCTTACCCAGAAGCAG------AAGGTGGGAGAACTGAAGGATGACGACTT	var1191	27G-T-A-A-G-A-29	0	6	0	-	28,29,30,31,32,33	-	28		62
CTTGAGGCCTTTCTTACCCAGAAGCAGGTAAGAAAGTGGGAGAACTGAAGGATGACGACTTT	CTTGAGGCCTTTCTTACCCAGAAGCAG-----AAGGTGGGAGAACTGAAGGATGACGACTTT	var1005	27G-T-A-A-G-2AG27	1	5	0	35	28,29,30,31,32	-	28		62
CTTGAGGCCTTTCTTACCCAGAAGCAGGTAAGGT----CACCTGAAGGATGACGACTTTGAGAA	CTTGAGGCCTTTCTTACCCAGAAGCAG--AAGGTGGGAGAACTGAAGGATGACGACTTTGAGAA	var927	27G-T-5-G-G-G-ACG1CA23	2	2	0	39,41	28,29	-	28		64
CTTGAGGCCTTTCTTACCCAGAAGCAGGTAAGGTGGGAGAACTGAAGGATGACGACTTTGAG	CTTGAGGCCTTTCTTACCCAGAAGCAG--AAGGTGGGAGAACTGAAGGATGACGACTTTGAG	var675	27G-T-33	0	2	0	-	28,29	-	28		62
CTTGAGGCCTTTCTTACCCAGAAGCAGGTAGGAGTGCACCTAGGTGGGAGAACTGAAGGATG	CTTGAGGCCTTTCTTACCCAGAAGCAG-------------AAGGTGGGAGAACTGAAGGATG	var1612	27G-T-A-G-G-A-G-T-G-C-A-C-C-TA21	1	13	0	41	28,29,30,31,32,33,34,35,36,37,38,39,40	-	28		62
CTTGAGGCCTTTCTTACCCAGAAGCAGGTGGGAAGAAGGTGGGAGAACTGAAGGATGACGAC	CTTGAGGCCTTTCTTACCCAGAAGCAG--------AAGGTGGGAGAACTGAAGGATGACGAC	var1319	27G-T-G-G-G-A-A-G-27	0	8	0	-	28,29,30,31,32,33,34,35	-	28		62
CTTGAGGCCTTTCTTACCCAGAAGCAGGTGGGAGAAGCAGGTGGGAGAACTGAAGGATGACG	CTTGAGGCCTTTCTTACCCAGAAGC----------AGAAGGTGGGAGAACTGAAGGATGACG	var1538	25A-G-G-T-G-G-G-A-G-A-2CA24	1	10	0	38	26,27,28,29,30,31,32,33,34,35	-	26		62
CTTGAGGCCTTTCTTACCCAGAAGCAGGTGGGAGGTAAGAAGGTGGGAGAACTGAAGGATGA	CTTGAGGCCTTTCTTACCCAGAAGC------------AGAAGGTGGGAGAACTGAAGGATGA	var1394	25A-G-G-T-G-G-G-A-G-G-T-A-25	0	12	0	-	26,27,28,29,30,31,32,33,34,35,36,37	-	26		62
CTTGAGGCCTTTCTTACCCAGAAGCAGGTGGGTAAGAACAGGTGGGAGAACTGAAGGATGAC	CTTGAGGCCTTTCTTACCCAGAAGCAG-----------AAGGTGGGAGAACTGAAGGATGAC	var1190	27G-T-G-G-G-T-A-A-G-A-A-CA23	1	11	0	39	28,29,30,31,32,33,34,35,36,37,38	-	28		62
CTTGAGGCCTTTCTTACCCAGAAGCAGGTGGGTAAGGTGGGAGAACTGAAGGATGACGACTT	CTTGAGGCCTTTCTTACCCAGAAGCAG------AAGGTGGGAGAACTGAAGGATGACGACTT	var1498	27G-T-G-G-G-T-29	0	6	0	-	28,29,30,31,32,33	-	28		62
CTTGAGGCCTTTCTTACCCAGAAGCAGGTGGTGGGAGAACTGAAGGATGACGACTTTGAGAA	CTTGAGGCCTTTCTTACCCAGAAGCAGAAGGTGGGAGAACTGAAGGATGACGACTTTGAGAA	var817	27GATA33	2	0	0	28,29	-	-			62
CTTGAGGCCTTTCTTACCCAGAAGCAGT-----GGAGAACTGAAGGATGACGACTTTGAGAA	CTTGAGGCCTTTCTTACCCAGAAGCAGAAGGTGGGAGAACTGAAGGATGACGACTTTGAGAA	var652	27TA-A-G-G-T-G29	1	0	5	28	-	29,30,31,32,33		29	62
CTTGAGGCCTTTCTTACCCAGAAGCAGT---TGGGAGAACTGAAGGATGACGACTTTGAGAA	CTTGAGGCCTTTCTTACCCAGAAGCAGAAGGTGGGAGAACTGAAGGATGACGACTTTGAGAA	var1412	27TA-A-G-G31	1	0	3	28	-	29,30,31		29	62
CTTGAGGCCTTTCTTACCCAGAAGCAGT-GGTAAGAGAACTGAAGGATGACGACTTTGAGAA	CTTGAGGCCTTTCTTACCCAGAAGCAGAAGGTGGGAGAACTGAAGGATGACGACTTTGAGAA	var1353	27TA-A3AGAG28	3	0	1	28,32,33	-	29		29	62
CTTGAGGCCTTTCTTACCCAGAAGCAGT-GGTGGGAGAACTGAAGGATGACGACTTTGAGAA	CTTGAGGCCTTTCTTACCCAGAAGCAGAAGGTGGGAGAACTGAAGGATGACGACTTTGAGAA	var643	27TA-A33	1	0	1	28	-	29		29	62
CTTGAGGCCTTTCTTACCCAGAAGCAGTA-----------AGAAGGATGACGACTTTGAGAA	CTTGAGGCCTTTCTTACCCAGAAGCAGAAGGTGGGAGAACTGAAGGATGACGACTTTGAGAA	var1610	27TA1-G-G-T-G-G-G-A-G-A-A-CAT21	2	0	11	28,41	-	30,31,32,33,34,35,36,37,38,39,40		30	62
CTTGAGGCCTTTCTTACCCAGAAGCAGTA------AGAACTGAAGGATGACGACTTTGAGAA	CTTGAGGCCTTTCTTACCCAGAAGCAGAAGGTGGGAGAACTGAAGGATGACGACTTTGAGAA	var263	27TA1-G-G-T-G-G-G27	1	0	6	28	-	30,31,32,33,34,35		30	62
CTTGAGGCCTTTCTTACCCAGAAGCAGTA-----GAG-ACTGAAGGATGACGACTTTGAGAA	CTTGAGGCCTTTCTTACCCAGAAGCAGAAGGTGGGAGAACTGAAGGATGACGACTTTGAGAA	var860	27TA1-G-G-T-G-G3-A24	1	0	6	28	-	30,31,32,33,34,38		30	62
CTTGAGGCCTTTCTTACCCAGAAGCAGTAAG----AGAACTGAAGGATGACGACTTTGAGAA	CTTGAGGCCTTTCTTACCCAGAAGCAGAAGGTGGGAGAACTGAAGGATGACGACTTTGAGAA	var904	27TA1AG1-T-G-G-G27	2	0	4	28,30	-	32,33,34,35		32	62
CTTGAGGCCTTTCTTACCCAGAAGCAGTAAGAAAGGTGGGAGAACTGAAGGATGACGACTTT	CTTGAGGCCTTTCTTACCCAGAAGCAG-----AAGGTGGGAGAACTGAAGGATGACGACTTT	var811	27T-A-A-G-A-30	0	5	0	-	28,29,30,31,32	-	28		62
CTTGAGGCCTTTCTTACCCAGAAGCAGTAAGAAGGTGGGAGAACTGAAGGATGACGACTTTG	CTTGAGGCCTTTCTTACCCAGAAGCAG----AAGGTGGGAGAACTGAAGGATGACGACTTTG	var418	27T-A-A-G-31	0	4	0	-	28,29,30,31	-	28		62
CTTGAGGCCTTTCTTACCCAGAAGCAGTAAGAATAAGAAGTGGGAGAACTGAAGGATGACGA	CTTGAGGCCTTTCTTACCCAGAAGCAG-AAG--------GTGGGAGAACTGAAGGATGACGA	var756	27T-3A-A-T-A-A-G-A-A-23	0	9	0	-	28,32,33,34,35,36,37,38,39	-	28		62
CTTGAGGCCTTTCTTACCCAGAAGCAGTAAGAGGTGGGAGAACTGAAGGATGACGACTTTGA	CTTGAGGCCTTTCTTACCCAGAAGCAGAA---GGTGGGAGAACTGAAGGATGACGACTTTGA	var1058	27TA1A-G-A-30	1	3	0	28	30,31,32	-	30		62
CTTGAGGCCTTTCTTACCCAGAAGCAGTAAGGGGAAAAAACTGAAGGATGACGACTTTGAGA	CTTGAGGCCTTTCTTACCCAGAAGCAG-AAGGTGGGAGAACTGAAGGATGACGACTTTGAGA	var1658	27T-4GT1AGAG1AG24	4	1	0	33,35,36,38	28	-	28		62
CTTGAGGCCTTTCTTACCCAGAAGCAGTAAGGTGGGAGAACTGAAGGATGACGACTTTGAGA	CTTGAGGCCTTTCTTACCCAGAAGCAG-AAGGTGGGAGAACTGAAGGATGACGACTTTGAGA	var92	27T-34	0	1	0	-	28	-	28		62
CTTGAGGCCTTTCTTACCCAGAAGCAGTAAGTAAGGTGGGAGAACTGAAGGATGACGACTTT	CTTGAGGCCTTTCTTACCCAGAAGCAG-----AAGGTGGGAGAACTGAAGGATGACGACTTT	var661	27T-A-A-G-T-30	0	5	0	-	28,29,30,31,32	-	28		62
CTTGAGGCCTTTCTTACCCAGAAGCAGTAAGTGGGAGAACTGAAGGATGACGACTTTGAGAA	CTTGAGGCCTTTCTTACCCAGAAGCAGAAGGTGGGAGAACTGAAGGATGACGACTTTGAGAA	var408	27TA1AG32	2	0	0	28,30	-	-			62
CTTGAGGCCTTTCTTACCCAGAAGCAGTAG	CTTGAGGCCTTTCTTACCCAGAAGCAGAAG	var1165	27TA2	1	0	0	28	-	-			30
CTTGAGGCCTTTCTTACCCAGAAGCAGTAGG---GAGAACTGAAGGATGACGACTTTGAGAA	CTTGAGGCCTTTCTTACCCAGAAGCAGAAGGTGGGAGAACTGAAGGATGACGACTTTGAGAA	var771	27TA3-T-G-G28	1	0	3	28	-	32,33,34		32	62
CTTGAGGCCTTTCTTACCCAGAAGCAGTAGGTGGGAGAACTGAAGGATGACGACTTTGAGAA	CTTGAGGCCTTTCTTACCCAGAAGCAGAAGGTGGGAGAACTGAAGGATGACGACTTTGAGAA	var196	27TA34	1	0	0	28	-	-			62
CTTGAGGCCTTTCTTACCCAGAAGCAGTGGGAGAACTGAAGGTGGGAGAACTGAAGGATGAC	CTTGAGGCCTTTCTTACCCAGAAGCA-----------GAAGGTGGGAGAACTGAAGGATGAC	var941	26G-T-G-G-G-A-G-A-A-C-T-25	0	11	0	-	27,28,29,30,31,32,33,34,35,36,37	-	27		62
CTTGAGGCCTTTCTTACCCAGAAGCAGTGGGAGAACTGCAGGTGGGAGAACTGAAGGATGAC	CTTGAGGCCTTTCTTACCCAGAAGCA-----------GAAGGTGGGAGAACTGAAGGATGAC	var591	26G-T-G-G-G-A-G-A-A-C-T-1CA23	1	11	0	39	27,28,29,30,31,32,33,34,35,36,37	-	27		62
CTTGAGGCCTTTCTTACCCAGAAGCAGTGGGTAACTGAAGATGGGAGAACTGAAGGATGACG	CTTGAGGCCTTTCTTACCCAGAAGCA----------GAAGGTGGGAGAACTGAAGGATGACG	var966	26G-T-G-G-G-T-A-A-C-T-4AG21	1	10	0	41	27,28,29,30,31,32,33,34,35,36	-	27		62
CTTGAGGCCTTTCTTACCCAGAAGCAGTGGGTAAGAAAGGTGGGAGAACTGAAGGATGACGA	CTTGAGGCCTTTCTTACCCAGAAGCAG---------AAGGTGGGAGAACTGAAGGATGACGA	var1281	27T-G-G-G-T-A-A-G-A-26	0	9	0	-	28,29,30,31,32,33,34,35,36	-	28		62
CTTGAGGCCTTTCTTACCCAGAAGCAGTGGGTAAGATGGGAGAACTGAAGGATGACGACTTT	CTTGAGGCCTTTCTTACCCAGAAGCAG-----AAGGTGGGAGAACTGAAGGATGACGACTTT	var965	27T-G-G-G-T-3AG26	1	5	0	36	28,29,30,31,32	-	28		62
CTTGAGGCCTTTCTTACCCAGAAGCAGTGGTAGAACTGGTGGGAGAACTGAAGGATGACGAC	CTTGAGGCCTTTCTTACCCAGAAGC------AGAA--GGTGGGAGAACTGAAGGATGACGAC	var1422	25A-G-T-G-G-T-4C-T-25	0	8	0	-	26,27,28,29,30,31,36,37	-	26		62
CTTGAGGCCTTTCTTACCCAGAAGCAGTTACCCAGGTGGGAGAACTGAAGGATGACGACTTT	CTTGAGGCCTTTCTTACCCAGAAGCAGA-----AGGTGGGAGAACTGAAGGATGACGACTTT	var916	27TAT-A-C-C-C-29	1	5	0	28	29,30,31,32,33	-	29		62
CTTGAGGCCTTTCTTACCCAGAAGCAGTTC-TGGGAGAACTGAAGGATGACGACTTTGAGAA	CTTGAGGCCTTTCTTACCCAGAAGCAGAAGGTGGGAGAACTGAAGGATGACGACTTTGAGAA	var475	27TATACG-G31	3	0	1	28,29,30	-	31		31	62
CTTGAGGCCTTTCTTACCCAGAAGCAGTTCA--GGAGAACTGAAGGATGACGACTTTGAGAA	CTTGAGGCCTTTCTTACCCAGAAGCAGAAGGTGGGAGAACTGAAGGATGACGACTTTGAGAA	var1317	27TATACGAG-T-G29	4	0	2	28,29,30,31	-	32,33		32	62
CTTGAGGCCTTTCTTACCCAGAAGCAGTTCAGGTGGGAGAACTGAAGGATGACGACTTTGAG	CTTGAGGCCTTTCTTACCCAGAAGCAGA--AGGTGGGAGAACTGAAGGATGACGACTTTGAG	var754	27TAT-C-32	1	2	0	28	29,30	-	29		62
CTTGAGGCCTTTCTTACCCAGAAGCAGTTCAGTGGGAGAACTGAAGGATGACGACTTTGAGA	CTTGAGGCCTTTCTTACCCAGAAGCAGAAG-GTGGGAGAACTGAAGGATGACGACTTTGAGA	var1455	27TATACGA-31	3	1	0	28,29,30	31	-	31		62
CTTGAGGCCTTTCTTACCCAGAAGCAGTTCTCCCACCTCAGGTGGGAGAACTGAAGGATGAC	CTTGAGGCCTTTCTTACCCAGAAGCAG-----------AAGGTGGGAGAACTGAAGGATGAC	var1189	27T-T-C-T-C-C-C-A-C-C-T-CA23	1	11	0	39	28,29,30,31,32,33,34,35,36,37,38	-	28		62
CTTGAGGCCTTTCTTACCCAGAAGCAGTTCTCCCAGAAGGTGGGAGAACTGAAGGATGACGA	CTTGAGGCCTTTCTTACCCAGAAGCAG---------AAGGTGGGAGAACTGAAGGATGACGA	var704	27T-T-C-T-C-C-C-A-G-26	0	9	0	-	28,29,30,31,32,33,34,35,36	-	28		62
CTTGAGGCCTTTCTTACCCAGAAGCAGTTCTCCCAGGTGGGAGAACTGAAGGATGACGACTT	CTTGAGGCCTTTCTTACCCAGAAGCAGA------AGGTGGGAGAACTGAAGGATGACGACTT	var509	27TAT-C-T-C-C-C-28	1	6	0	28	29,30,31,32,33,34	-	29		62
CTTGAGGCCTTTCTTACCCAGAAGCAGTTCTTTTACCAGGTGGGAGAACTGAAGGATGACGA	CTTGAGGCCTTTCTTACCCAGAAGCAG---------AAGGTGGGAGAACTGAAGGATGACGA	var1089	27T-T-C-T-T-T-T-A-C-CA25	1	9	0	37	28,29,30,31,32,33,34,35,36	-	28		62
CTTGAGGCCTTTCTTACCCAGAAGCAGTTTCTTACCCAGGTGGGAGAACTGAAGGATGACGA	CTTGAGGCCTTTCTTACCCAGAAGCAG---------AAGGTGGGAGAACTGAAGGATGACGA	var414	27T-T-T-C-T-T-A-C-C-CA25	1	9	0	37	28,29,30,31,32,33,34,35,36	-	28		62
CTTGAGGCCTTTCTTACCCAGAAGCAT-------GAGAACTGAAGGATGACGACTTTGAGAA	CTTGAGGCCTTTCTTACCCAGAAGCAGAAGGTGGGAGAACTGAAGGATGACGACTTTGAGAA	var1657	26TG-A-A-G-G-T-G-G28	1	0	7	27	-	28,29,30,31,32,33,34		28	62
CTTGAGGCCTTTCTTACCCAGAAGCAT---GTGGGAGAACTGAAGGATGACGACTTTGAGAA	CTTGAGGCCTTTCTTACCCAGAAGCAGAAGGTGGGAGAACTGAAGGATGACGACTTTGAGAA	var803	26TG-A-A-G32	1	0	3	27	-	28,29,30		28	62
CTTGAGGCCTTTCTTACCCAGAAGCAT--GGTGGGAGAACTGAAGGATGACGACTTTGAGAA	CTTGAGGCCTTTCTTACCCAGAAGCAGAAGGTGGGAGAACTGAAGGATGACGACTTTGAGAA	var759	26TG-A-A33	1	0	2	27	-	28,29		28	62
CTTGAGGCCTTTCTTACCCAGAAGCATAAGGTGGGAGAACTGAAGGATGACGACTTTGAGAA	CTTGAGGCCTTTCTTACCCAGAAGCAGAAGGTGGGAGAACTGAAGGATGACGACTTTGAGAA	var785	26TG35	1	0	0	27	-	-			62
CTTGAGGCCTTTCTTACCCAGAAGCATCCTTCAGGTGGGAGAACTGAAGGATGACGACTTTG	CTTGAGGCCTTTCTTACCCAGAAGCAGA----AGGTGGGAGAACTGAAGGATGACGACTTTG	var1497	26TGCAC-T-T-C-30	2	4	0	27,28	29,30,31,32	-	29		62
CTTGAGGCCTTTCTTACCCAGAAGCATCTGAAGGTGGGAGAACTGAAGGATGACGACTTTGA	CTTGAGGCCTTTCTTACCCAGAAGCA---GAAGGTGGGAGAACTGAAGGATGACGACTTTGA	var789	26T-C-T-33	0	3	0	-	27,28,29	-	27		62
CTTGAGGCCTTTCTTACCCAGAAGCATCTTCAGGTGGGAGAACTGAAGGATGACGACTTTGA	CTTGAGGCCTTTCTTACCCAGAAGCAGA---AGGTGGGAGAACTGAAGGATGACGACTTTGA	var1240	26TGCAT-T-C-31	2	3	0	27,28	29,30,31	-	29		62
CTTGAGGCCTTTCTTACCCAGAAGCATGACG----AGAACTGAAGGATGACGACTTTGAGAA	CTTGAGGCCTTTCTTACCCAGAAGCAGAAGGTGGGAGAACTGAAGGATGACGACTTTGAGAA	var964	26TGGA1CG1-T-G-G-G27	3	0	4	27,28,30	-	32,33,34,35		32	62
CTTGAGGCCTTTCTTACCCAGAAGCATGACGACTTTGGGAGAACTGAAGGATGACGACTTTG	CTTGAGGCCTTTCTTACCCAGAAGCAGAAGG----TGGGAGAACTGAAGGATGACGACTTTG	var1164	26TGGA1CG1A-C-T-T-27	3	4	0	27,28,30	32,33,34,35	-	32		62
CTTGAGGCCTTTCTTACCCAGAAGCATGACGCTTCCTTACCCTGAAGGATGACGACTTTGAG	CTTGAGGCCTTTCTTACCCAGAAGCA-GAAGGTGGGAGA-ACTGAAGGATGACGACTTTGAG	var1576	26T-2CA1CG1TGCGCGTATG1C-CA21	8	2	0	30,32,34,35,36,37,38,41	27,40	-	27		62
CTTGAGGCCTTTCTTACCCAGAAGCATGAGAACTGAAGGGAGAACTGAAGGATGACGACTTT	CTTGAGGCCTTTCTTACCCAGAAGC---AGAA--GGTGGGAGAACTGAAGGATGACGACTTT	var1421	25A-T-G-4C-T-1AGAT25	2	5	0	36,37	26,27,28,33,34	-	26		62
CTTGAGGCCTTTCTTACCCAGAAGCATTCAGTGGGAGAACTGAAGGATGACGACTTTGAGAA	CTTGAGGCCTTTCTTACCCAGAAGCAGAAGGTGGGAGAACTGAAGGATGACGACTTTGAGAA	var390	26TGTACAAG32	4	0	0	27,28,29,30	-	-			62
CTTGAGGCCTTTCTTACCCAGAAGCC-----TGGGTAGAACTGAAGGATGACGACTTTGAGAA	CTTGAGGCCTTTCTTACCCAGAAGCAGAAGGTGGG-AGAACTGAAGGATGACGACTTTGAGAA	var714	25CA-G-A-A-G-G4T-27	1	1	5	26	36	27,28,29,30,31	36	27	63
CTTGAGGCCTTTCTTACCCAGAAGCCGAAAGGTGGGAGAACTGAAGGATGACGACTTTGAGA	CTTGAGGCCTTTCTTACCCAGAAGCAGAA-GGTGGGAGAACTGAAGGATGACGACTTTGAGA	var896	25CA3A-32	1	1	0	26	30	-	30		62
CTTGAGGCCTTTCTTACCCAGAAGCCGAAGGTGGGAGAACTGAAGGATGACGACTTTGAGAA	CTTGAGGCCTTTCTTACCCAGAAGCAGAAGGTGGGAGAACTGAAGGATGACGACTTTGAGAA	var350	25CA36	1	0	0	26	-	-			62
CTTGAGGCCTTTCTTACCCAGAAGCCTCAAGTGGGAGAACTGAAGGATGACGACTTTGAGAA	CTTGAGGCCTTTCTTACCCAGAAGCAGAAGGTGGGAGAACTGAAGGATGACGACTTTGAGAA	var1481	25CATGCA1AG32	4	0	0	26,27,28,30	-	-			62
CTTGAGGCCTTTCTTACCCAGAAGCCTCAGG----AGAACTGAAGGATGACGACTTTGAGAA	CTTGAGGCCTTTCTTACCCAGAAGCAGAAGGTGGGAGAACTGAAGGATGACGACTTTGAGAA	var697	25CATGCA3-T-G-G-G27	3	0	4	26,27,28	-	32,33,34,35		32	62
CTTGAGGCCTTTCTTACCCAGAAGCCTCAGGTGGGAGAACTGAAGGATGACGACTTTGAGAA	CTTGAGGCCTTTCTTACCCAGAAGCAGAAGGTGGGAGAACTGAAGGATGACGACTTTGAGAA	var1557	25CATGCA34	3	0	0	26,27,28	-	-			62
CTTGAGGCCTTTCTTACCCAGAAGCCTTTCTTACCAGAAGGTGGGAGAACTGAAGGATGACG	CTTGAGGCCTTTCTTACCCAGAAGC----------AGAAGGTGGGAGAACTGAAGGATGACG	var1454	25C-T-T-T-C-T-T-A-C-C-27	0	10	0	-	26,27,28,29,30,31,32,33,34,35	-	26		62
CTTGAGGCCTTTCTTACCCAGAAGCCTTTCTTACCCAGAAGGTGGGAGAACTGAAGGATGAC	CTTGAGGCCTTTCTTACCCAGAAGC-----------AGAAGGTGGGAGAACTGAAGGATGAC	var1453	25C-T-T-T-C-T-T-A-C-C-C-26	0	11	0	-	26,27,28,29,30,31,32,33,34,35,36	-	26		62
CTTGAGGCCTTTCTTACCCAGAAGCCTTTCTTACCCAGGTGGGAGAACTGAAGGATGACGAC	CTTGAGGCCTTTCTTACCCAGAAGCAGA--------AGGTGGGAGAACTGAAGGATGACGAC	var827	25CATGTAT-C-T-T-A-C-C-C-26	3	8	0	26,27,28	29,30,31,32,33,34,35,36	-	29		62
CTTGAGGCCTTTCTTACCCAGAAGCGAGAGAAAGTGGGAG	CTTGAGGCCTTTCTTACCCAGAAGC---AGAAGGTGGGAG	var1136	25G-A-G-4AG7	1	3	0	33	26,27,28	-	26		40
CTTGAGGCCTTTCTTACCCAGAAGCGG---GTGGGAGAACTGAAGGATGACGACTTTGAGAA	CTTGAGGCCTTTCTTACCCAGAAGCAGAAGGTGGGAGAACTGAAGGATGACGACTTTGAGAA	var305	25GA1-A-A-G32	1	0	3	26	-	28,29,30		28	62
CTTGAGGCCTTTCTTACCCAGAAGCGGA-GGTGGGAGAACTGAAGGATGACGACTTTGAGAA	CTTGAGGCCTTTCTTACCCAGAAGCAGAAGGTGGGAGAACTGAAGGATGACGACTTTGAGAA	var724	25GA2-A33	1	0	1	26	-	29		29	62
CTTGAGGCCTTTCTTACCCAGAAGCGGAAAGGTGGGAGAACTGAAGGATGACGACTTTGAGA	CTTGAGGCCTTTCTTACCCAGAAGCAGAA-GGTGGGAGAACTGAAGGATGACGACTTTGAGA	var259	25GA3A-32	1	1	0	26	30	-	30		62
CTTGAGGCCTTTCTTACCCAGAAGCGGAAGG	CTTGAGGCCTTTCTTACCCAGAAGCAGAAGG	var1333	25GA5	1	0	0	26	-	-			31
CTTGAGGCCTTTCTTACCCAGAAGCGGAAGGTGGGAGAACTGAAGGATGACGACTTTGAGAA	CTTGAGGCCTTTCTTACCCAGAAGCAGAAGGTGGGAGAACTGAAGGATGACGACTTTGAGAA	var64	25GA36	1	0	0	26	-	-			62
CTTGAGGCCTTTCTTACCCAGAAGCTGAA---GGATGAACTGAAGGATGACGACTTTGAGAA	CTTGAGGCCTTTCTTACCCAGAAGCAGAAGGTGGGAGAACTGAAGGATGACGACTTTGAGAA	var1239	25TA3-G-G-T2AGTA26	3	0	3	26,35,36	-	30,31,32		30	62
CTTGAGGCCTTTCTTACCCAGAAGCTGAAAGGTGGGAGAACTGAAGGATGACGACTTTGAGA	CTTGAGGCCTTTCTTACCCAGAAGCAGAA-GGTGGGAGAACTGAAGGATGACGACTTTGAGA	var1026	25TA3A-32	1	1	0	26	30	-	30		62
CTTGAGGCCTTTCTTACCCAGAAGCTGAAGG----AGAACTGAAGGATGACGACTTTGAGAA	CTTGAGGCCTTTCTTACCCAGAAGCAGAAGGTGGGAGAACTGAAGGATGACGACTTTGAGAA	var669	25TA5-T-G-G-G27	1	0	4	26	-	32,33,34,35		32	62
CTTGAGGCCTTTCTTACCCAGAAGCTGAAGGATGGGAGAACTGAAGGATGACGACTTTGAGA	CTTGAGGCCTTTCTTACCCAGAAGCAGAAGG-TGGGAGAACTGAAGGATGACGACTTTGAGA	var549	25TA5A-30	1	1	0	26	32	-	32		62
CTTGAGGCCTTTCTTACCCAGAAGCTGAAGGTGGGAGAACTGAAGGATGACGACTTTGAGAA	CTTGAGGCCTTTCTTACCCAGAAGCAGAAGGTGGGAGAACTGAAGGATGACGACTTTGAGAA	var321	25TA36	1	0	0	26	-	-			62
CTTGAGGCCTTTCTTACCCAGAAGCTGCTTCTGGGAGAACTGAAGGATGACGACTTTGAGAA	CTTGAGGCCTTTCTTACCCAGAAGCAGAAGGTGGGAGAACTGAAGGATGACGACTTTGAGAA	var335	25TA1CATATGCG31	5	0	0	26,28,29,30,31	-	-			62
CTTGAGGCCTTTCTTACCCAGAAGCTGCTTGTGGGAGAACTGAAGGATGACGACTTTGAGAA	CTTGAGGCCTTTCTTACCCAGAAGCAGAAGGTGGGAGAACTGAAGGATGACGACTTTGAGAA	var1452	25TA1CATATG32	4	0	0	26,28,29,30	-	-			62
CTTGAGGCCTTTCTTACCCAGAAGCTGTGGGAGACCTTGAACAGGTGGGAGAACTGAAGGAT	CTTGAGGCCTTTCTTACCCAGAAGC------AGA--------AGGTGGGAGAACTGAAGGAT	var1496	25T-G-T-G-G-G-3C-C-T-T-G-A-A-C-20	0	14	0	-	26,27,28,29,30,31,35,36,37,38,39,40,41,42	-	26		62
CTTGAGGCCTTTCTTACCCAGAAGCTT---GTGGAAGAACTGAAGGATGACGACTTTGAGAA	CTTGAGGCCTTTCTTACCCAGAAGCAGAAGGTGGGAGAACTGAAGGATGACGACTTTGAGAA	var1314	25TATG-A-A-G4AG27	3	0	3	26,27,33	-	28,29,30		28	62
CTTGAGGCCTTTCTTACCCAGAAGCTT---GTGGGAGAACTGAAGGATGACGACTTTGAGAA	CTTGAGGCCTTTCTTACCCAGAAGCAGAAGGTGGGAGAACTGAAGGATGACGACTTTGAGAA	var384	25TATG-A-A-G32	2	0	3	26,27	-	28,29,30		28	62
CTTGAGGCCTTTCTTACCCAGAAGCTTA---------CCCAGAAGGATGACGACTTTGAGAA	CTTGAGGCCTTTCTTACCCAGAAGCAGAAGGTGGGAGAACTGAAGGATGACGACTTTGAGAA	var339	25TATG1-A-G-G-T-G-G-G-A-GCACA1AT21	5	0	9	26,27,38,39,41	-	29,30,31,32,33,34,35,36,37		29	62
CTTGAGGCCTTTCTTACCCAGAAGCTTACCCAGGTGGGAGAACTGAAGGATGACGACTTTGA	CTTGAGGCCTTTCTTACCCAGAAGCAGA---AGGTGGGAGAACTGAAGGATGACGACTTTGA	var859	25TATG1C-C-C-31	2	3	0	26,27	29,30,31	-	29		62
CTTGAGGCCTTTCTTACCCAGAAGCTTACCTGAAGGTGGGAGAACTGAAGGATGACGACTTT	CTTGAGGCCTTTCTTACCCAGAAGCA-----GAAGGTGGGAGAACTGAAGGATGACGACTTT	var1315	25TAT-A-C-C-T-31	1	5	0	26	27,28,29,30,31	-	27		62
CTTGAGGCCTTTCTTACCCAGAAGCTTC---TGGGAGAACTGAAGGATGACGACTTTGAGAA	CTTGAGGCCTTTCTTACCCAGAAGCAGAAGGTGGGAGAACTGAAGGATGACGACTTTGAGAA	var40	25TATGCA-A-G-G31	3	0	3	26,27,28	-	29,30,31		29	62
CTTGAGGCCTTTCTTACCCAGAAGCTTCAGGTGGGAGAACTGAAGGATGACGACTTTGAGAA	CTTGAGGCCTTTCTTACCCAGAAGCAGAAGGTGGGAGAACTGAAGGATGACGACTTTGAGAA	var239	25TATGCA34	3	0	0	26,27,28	-	-			62
CTTGAGGCCTTTCTTACCCAGAAGCTTCCATTGGGAGAACTGAAGGATGACGACTTTGAGAA	CTTGAGGCCTTTCTTACCCAGAAGCAGAAGGTGGGAGAACTGAAGGATGACGACTTTGAGAA	var465	25TATGCACAAGTG31	6	0	0	26,27,28,29,30,31	-	-			62
CTTGAGGCCTTTCTTACCCAGAAGCTTCTGG----AGAACTGAAGGATGACGACTTTGAGAA	CTTGAGGCCTTTCTTACCCAGAAGCAGAAGGTGGGAGAACTGAAGGATGACGACTTTGAGAA	var1186	25TATGCATA2-T-G-G-G27	4	0	4	26,27,28,29	-	32,33,34,35		32	62
CTTGAGGCCTTTCTTACCCAGAAGCTTCTGG--GGAGAACTGAAGGATGACGACTTTGAGAA	CTTGAGGCCTTTCTTACCCAGAAGCAGAAGGTGGGAGAACTGAAGGATGACGACTTTGAGAA	var1039	25TATGCATA2-T-G29	4	0	2	26,27,28,29	-	32,33		32	62
CTTGAGGCCTTTCTTACCCAGAAGCTTCTGGGAGAAGTTCTGGGAGAACTGAAGGATGACGA	CTTGAGGCCTTTCTTACCCAGAAGC-------AGAAG--GTGGGAGAACTGAAGGATGACGA	var1451	25T-T-C-T-G-G-G-5T-T-CG22	1	9	0	40	26,27,28,29,30,31,32,38,39	-	26		62
CTTGAGGCCTTTCTTACCCAGAAGCTTCTGGGTAAGTGGGAGAACTGAAGGATGACGACTTT	CTTGAGGCCTTTCTTACCCAGAAGCA-----GAAGGTGGGAGAACTGAAGGATGACGACTTT	var309	25TAT-C-T-G-G-1TA1AG27	3	5	0	26,32,34	27,28,29,30,31	-	27		62
CTTGAGGCCTTTCTTACCCAGAAGCTTCTGGGTGGGAGAACTGAAGGATGACGACTTTGAGA	CTTGAGGCCTTTCTTACCCAGAAGCAGAAGG-TGGGAGAACTGAAGGATGACGACTTTGAGA	var148	25TATGCATA2G-30	4	1	0	26,27,28,29	32	-	32		62
CTTGAGGCCTTTCTTACCCAGAAGCTTCTGGTA--AGAACTGAAGGATGACGACTTTGAGAA	CTTGAGGCCTTTCTTACCCAGAAGCAGAAGGTGGGAGAACTGAAGGATGACGACTTTGAGAA	var1608	25TATGCATA3AG-G-G27	5	0	2	26,27,28,29,33	-	34,35		34	62
CTTGAGGCCTTTCTTACCCAGAAGCTTCTGGTGGGAGAACTGAAGGATGACGACTTTGAGAA	CTTGAGGCCTTTCTTACCCAGAAGCAGAAGGTGGGAGAACTGAAGGATGACGACTTTGAGAA	var596	25TATGCATA33	4	0	0	26,27,28,29	-	-			62
CTTGAGGCCTTTCTTACCCAGAAGCTTTCTTACCCAGGTGGGAGAACTGAAGGATGACGACT	CTTGAGGCCTTTCTTACCCAGAAGCAGA-------AGGTGGGAGAACTGAAGGATGACGACT	var1017	25TATGTAC-T-T-A-C-C-C-27	3	7	0	26,27,28	29,30,31,32,33,34,35	-	29		62
CTTGAGGCCTTTCTTACCCAGAAGGA--------------TGAAGGATGACGACTTTGAGAA	CTTGAGGCCTTTCTTACCCAGAAGCAGAAGGTGGGAGAACTGAAGGATGACGACTTTGAGAA	var1350	24GC1-G-A-A-G-G-T-G-G-G-A-G-A-A-C22	1	0	14	25	-	27,28,29,30,31,32,33,34,35,36,37,38,39,40		27	62
CTTGAGGCCTTTCTTACCCAGAAGGAG------GGAGAACTGAAGGATGACGACTTTGAGAA	CTTGAGGCCTTTCTTACCCAGAAGCAGAAGGTGGGAGAACTGAAGGATGACGACTTTGAGAA	var220	24GC2-A-A-G-G-T-G29	1	0	6	25	-	28,29,30,31,32,33		28	62
CTTGAGGCCTTTCTTACCCAGAAGGAGAA	CTTGAGGCCTTTCTTACCCAGAAGCAGAA	var1420	24GC4	1	0	0	25	-	-			29
CTTGAGGCCTTTCTTACCCAGAAGGAT---------GAACTGAAGGATGACGACTTTGAGAA	CTTGAGGCCTTTCTTACCCAGAAGCAGAAGGTGGGAGAACTGAAGGATGACGACTTTGAGAA	var1019	24GC1TG-A-A-G-G-T-G-G-G-A26	2	0	9	25,27	-	28,29,30,31,32,33,34,35,36		28	62
CTTGAGGCCTTTCTTACCCAGAAGGATAAGG---GAGAACTGAAGGATGACGACTTTGAGAA	CTTGAGGCCTTTCTTACCCAGAAGCAGAAGGTGGGAGAACTGAAGGATGACGACTTTGAGAA	var1607	24GC1TG4-T-G-G28	2	0	3	25,27	-	32,33,34		32	62
CTTGAGGCCTTTCTTACCCAGAAGGATAAGGTGGGAGAACTGAAGGATGACGACTTTGAGAA	CTTGAGGCCTTTCTTACCCAGAAGCAGAAGGTGGGAGAACTGAAGGATGACGACTTTGAGAA	var1069	24GC1TG35	2	0	0	25,27	-	-			62
CTTGAGGCCTTTCTTACCCAGAAGGCCTTACCCAGAAGGCCTTTCTTAACTGAAGGATGACG	CTTGAGGCCTTTCTTACCCAGAAG--------CAGAAGG--TGGGAGAACTGAAGGATGACG	var1535	24G-C-C-T-T-A-C-C-7C-C-1TGTGCGTATG15	5	10	0	43,44,45,46,47	25,26,27,28,29,30,31,32,40,41	-	25		62
CTTGAGGCCTTTCTTACCCAGAAGGCCTTTCTT----AACTGAAGGATGACGACTTTGAGAA	CTTGAGGCCTTTCTTACCCAGAAGCAGAAGGTGGGAGAACTGAAGGATGACGACTTTGAGAA	var356	24GCCACGTATATGCG1TG-G-G-A-G25	8	0	4	25,26,27,28,29,30,31,33	-	34,35,36,37		34	62
CTTGAGGCCTTTCTTACCCAGAAGGCCTTTCTTACCCAGAAGGTGGGAGAACTGAAGGATGA	CTTGAGGCCTTTCTTACCCAGAAG------------CAGAAGGTGGGAGAACTGAAGGATGA	var1495	24G-C-C-T-T-T-C-T-T-A-C-C-26	0	12	0	-	25,26,27,28,29,30,31,32,33,34,35,36	-	25		62
CTTGAGGCCTTTCTTACCCAGAAGGCCTTTCTTACCCAGGTGGGAGAACTGAAGGATGACGA	CTTGAGGCCTTTCTTACCCAGAAG------CAGA---AGGTGGGAGAACTGAAGGATGACGA	var730	24G-C-C-T-T-T-1TATG1C-C-C-25	2	9	0	32,33	25,26,27,28,29,30,35,36,37	-	25		62
CTTGAGGCCTTTCTTACCCAGAAGGGTAAGGTGGGAGAACTGAAGGATGACGACTTTGAGAA	CTTGAGGCCTTTCTTACCCAGAAGCAGAAGGTGGGAGAACTGAAGGATGACGACTTTGAGAA	var783	24GCGATG35	3	0	0	25,26,27	-	-			62
CTTGAGGCCTTTCTTACCCAGAAGGT-AAGGTGGGAGAACTGAAGGATGACGACTTTGAGAA	CTTGAGGCCTTTCTTACCCAGAAGCAGAAGGTGGGAGAACTGAAGGATGACGACTTTGAGAA	var1118	24GCTA-G35	2	0	1	25,26	-	27		27	62
CTTGAGGCCTTTCTTACCCAGAAGGTAAGAAAGGTAAGAAAGAAGGTGGGAGAACTGAAGGA	CTTGAGGCCTTTCTTACCCAGAAG---------------CAGAAGGTGGGAGAACTGAAGGA	var1279	24G-T-A-A-G-A-A-A-G-G-T-A-A-G-A-AC22	1	15	0	40	25,26,27,28,29,30,31,32,33,34,35,36,37,38,39	-	25		62
CTTGAGGCCTTTCTTACCCAGAAGGTAAGAAGGTGGGAGAACTGAAGGATGACGACTTTGAG	CTTGAGGCCTTTCTTACCCAGAAGC--AGAAGGTGGGAGAACTGAAGGATGACGACTTTGAG	var1450	24GCT-A-35	1	2	0	25	26,27	-	26		62
CTTGAGGCCTTTCTTACCCAGAAGGTGGGTAAGAACTGAAGGATGGGAGAACTGAAGGATGA	CTTGAGGCCTTTCTTACCCAGAAG-----------CAGAAGG-TGGGAGAACTGAAGGATGA	var1231	24G-T-G-G-G-T-A-A-G-A-A-1TA5A-19	1	12	0	37	25,26,27,28,29,30,31,32,33,34,35,43	-	25		62
CTTGAGGCCTTTCTTACCCAGAAGT--------GGAGAACTGAAGGATGACGACTTTGAGAA	CTTGAGGCCTTTCTTACCCAGAAGCAGAAGGTGGGAGAACTGAAGGATGACGACTTTGAGAA	var1296	24TC-A-G-A-A-G-G-T-G29	1	0	8	25	-	26,27,28,29,30,31,32,33		26	62
CTTGAGGCCTTTCTTACCCAGAAGTA---------AGAACTGAAGGATGACGACTTTGAGAA	CTTGAGGCCTTTCTTACCCAGAAGCAGAAGGTGGGAGAACTGAAGGATGACGACTTTGAGAA	var1236	24TC1-G-A-A-G-G-T-G-G-G27	1	0	9	25	-	27,28,29,30,31,32,33,34,35		27	62
CTTGAGGCCTTTCTTACCCAGAAGTAAA-----GGAGAACTGAAGGATGACGACTTTGAGAA	CTTGAGGCCTTTCTTACCCAGAAGCAGAAGGTGGGAGAACTGAAGGATGACGACTTTGAGAA	var1087	24TC1AG1-A-G-G-T-G29	2	0	5	25,27	-	29,30,31,32,33		29	62
CTTGAGGCCTTTCTTACCCAGAAGTAG---GTGGGAGAACTGAAGGATGACGACTTTGAGAA	CTTGAGGCCTTTCTTACCCAGAAGCAGAAGGTGGGAGAACTGAAGGATGACGACTTTGAGAA	var751	24TC2-A-A-G32	1	0	3	25	-	28,29,30		28	62
CTTGAGGCCTTTCTTACCCAGAAGTAGA-GGTGGGAGAACTGAAGGATGACGACTTTGAGAA	CTTGAGGCCTTTCTTACCCAGAAGCAGAAGGTGGGAGAACTGAAGGATGACGACTTTGAGAA	var1632	24TC3-A33	1	0	1	25	-	29		29	62
CTTGAGGCCTTTCTTACCCAGAAGTAGAAAGGTGGGAGAACTGAAGGATGACGACTTTGAGA	CTTGAGGCCTTTCTTACCCAGAAGCAGAA-GGTGGGAGAACTGAAGGATGACGACTTTGAGA	var625	24TC4A-32	1	1	0	25	30	-	30		62
CTTGAGGCCTTTCTTACCCAGAAGTAGAAGGTGGGAGAACTGAAGGATGACGACTTTGAGAA	CTTGAGGCCTTTCTTACCCAGAAGCAGAAGGTGGGAGAACTGAAGGATGACGACTTTGAGAA	var134	24TC37	1	0	0	25	-	-			62
CTTGAGGCCTTTCTTACCCAGAAGTGG---GTGGGAGAACTGAAGGATGACGACTTTGAGAA	CTTGAGGCCTTTCTTACCCAGAAGCAGAAGGTGGGAGAACTGAAGGATGACGACTTTGAGAA	var318	24TCGA1-A-A-G32	2	0	3	25,26	-	28,29,30		28	62
CTTGAGGCCTTTCTTACCCAGAAGTGGGAGAACTGA--ACTGAAGGATGACGACTTTGAGAA	CTTGAGGCCTTTCTTACCCAGAAGCAGAAGGTGGGAGAACTGAAGGATGACGACTTTGAGAA	var1656	24TCGA1GA2AGATCGTG2-G-A24	7	0	2	25,26,28,31,32,33,34	-	37,38		37	62
CTTGAGGCCTTTCTTACCCAGAAGTGGGTAAGTTCTCCACTGAAGTGGGAGAACTGAAGGAT	CTTGAGGCCTTTCTTACCCAGAAGCAG--AAG------------GTGGGAGAACTGAAGGAT	var1492	24TCGA1G-T-3T-T-C-T-C-C-A-C-T-G-A-A-18	2	14	0	25,26	28,29,33,34,35,36,37,38,39,40,41,42,43,44	-	28		62
CTTGAGGCCTTTCTTACCCAGAAGTTACCCAGGTGGGAGAACTGAAGGATGACGACTTTGAG	CTTGAGGCCTTTCTTACCCAGAAGCAGA--AGGTGGGAGAACTGAAGGATGACGACTTTGAG	var655	24TCTAAGCAC-C-32	4	2	0	25,26,27,28	29,30	-	29		62
CTTGAGGCCTTTCTTACCCAGAAGTTCA--GTGGGAGAACTGAAGGATGACGACTTTGAGAA	CTTGAGGCCTTTCTTACCCAGAAGCAGAAGGTGGGAGAACTGAAGGATGACGACTTTGAGAA	var1393	24TCTACG1-A-G32	3	0	2	25,26,27	-	29,30		29	62
CTTGAGGCCTTTCTTACCCAGAAGTTCA-GGTGGGAGAACTGAAGGATGACGACTTTGAGAA	CTTGAGGCCTTTCTTACCCAGAAGCAGAAGGTGGGAGAACTGAAGGATGACGACTTTGAGAA	var826	24TCTACG1-A33	3	0	1	25,26,27	-	29		29	62
CTTGAGGCCTTTCTTACCCAGAAGTTCT-GGTGGGAGAACTGAAGGATGACGACTTTGAGAA	CTTGAGGCCTTTCTTACCCAGAAGCAGAAGGTGGGAGAACTGAAGGATGACGACTTTGAGAA	var1148	24TCTACGTA-A33	4	0	1	25,26,27,28	-	29		29	62
CTTGAGGCCTTTCTTACCCAGAAGTTCTCCCAGGTGGGAGAACTGAAGGATGACGACTTTGA	CTTGAGGCCTTTCTTACCCAGAAGCAGA---AGGTGGGAGAACTGAAGGATGACGACTTTGA	var193	24TCTACGTAC-C-C-31	4	3	0	25,26,27,28	29,30,31	-	29		62
CTTGAGGCCTTTCTTACCCAGAAGTTCTCTGCTGAAGTTCTCTGAACTGAAGGATGACGACT	CTTGAGGCCTTTCTTACCCAGAA-------GCAGAAGGTGGGAGAACTGAAGGATGACGACT	var568	23G-T-T-C-T-C-T-2TA4TG1CGTGCGTA19	6	7	0	33,38,40,41,42,43	24,25,26,27,28,29,30	-	24		62
CTTGAGGCCTTTCTTACCCAGAAGTTTTCAGTGGGAGAACTGAAGGATGACGACTTTGAGAA	CTTGAGGCCTTTCTTACCCAGAAGCAGAAGGTGGGAGAACTGAAGGATGACGACTTTGAGAA	var1574	24TCTATGTACAAG32	6	0	0	25,26,27,28,29,30	-	-			62
CTTGAGGCCTTTCTTACCCAGAATCAGAAGGTGGGAGAACTGAAGGATGACGACTTTGAGAA	CTTGAGGCCTTTCTTACCCAGAAGCAGAAGGTGGGAGAACTGAAGGATGACGACTTTGAGAA	var798	23TG38	1	0	0	24	-	-			62
CTTGAGGCCTTTCTTACCCAGACGCAG---GTGGGAGAACTGAAGGATGACGACTTTGAGAA	CTTGAGGCCTTTCTTACCCAGAAGCAGAAGGTGGGAGAACTGAAGGATGACGACTTTGAGAA	var766	22CA4-A-A-G32	1	0	3	23	-	28,29,30		28	62
CTTGAGGCCTTTCTTACCCAGACGCAGAAAGGTGGGAGAACTGAAGGATGACGACTTTGAGA	CTTGAGGCCTTTCTTACCCAGAAGCAGAA-GGTGGGAGAACTGAAGGATGACGACTTTGAGA	var748	22CA6A-32	1	1	0	23	30	-	30		62
CTTGAGGCCTTTCTTACCCAGACGCAGAAGGTGGGAGAACTGAAGGATGACGACTTTGAGAA	CTTGAGGCCTTTCTTACCCAGAAGCAGAAGGTGGGAGAACTGAAGGATGACGACTTTGAGAA	var218	22CA39	1	0	0	23	-	-			62
CTTGAGGCCTTTCTTACCCAGAGA---AAGGTGGGAGAACTGAAGGATGACGACTTTGAGAA	CTTGAGGCCTTTCTTACCCAGAAGCAGAAGGTGGGAGAACTGAAGGATGACGACTTTGAGAA	var1533	22GAAG-C-A-G35	2	0	3	23,24	-	25,26,27		25	62
CTTGAGGCCTTTCTTACCCAGAGACAGAAGGTGGGAGAACTAAAGGATGACGACTTTGAGAA	CTTGAGGCCTTTCTTACCCAGAAGCAGAAGGTGGGAGAACTGAAGGATGACGACTTTGAGAA	var296	22GAAG17AG20	3	0	0	23,24,42	-	-			62
CTTGAGGCCTTTCTTACCCAGAGACAGAAGGTGGGAGAACTGAAGGATGACGACTTTGAGAA	CTTGAGGCCTTTCTTACCCAGAAGCAGAAGGTGGGAGAACTGAAGGATGACGACTTTGAGAA	var513	22GAAG38	2	0	0	23,24	-	-			62
CTTGAGGCCTTTCTTACCCAGAGATAGAAGGAGGGAGAACTAAAGGATGACGACTTTGAGAA	CTTGAGGCCTTTCTTACCCAGAAGCAGAAGGTGGGAGAACTGAAGGATGACGACTTTGAGAA	var1624	22GAAGTC6AT9AG20	5	0	0	23,24,25,32,42	-	-			62
CTTGAGGCCTTTCTTACCCAGAGATAGAAGGTGGGAGAACTAAAGGATGACGACTTTGAGAA	CTTGAGGCCTTTCTTACCCAGAAGCAGAAGGTGGGAGAACTGAAGGATGACGACTTTGAGAA	var12	22GAAGTC16AG20	4	0	0	23,24,25,42	-	-			62
CTTGAGGCCTTTCTTACCCAGAGATAGAAGGTGGGAGAACTGAAGGATGACGACTTTGAGAA	CTTGAGGCCTTTCTTACCCAGAAGCAGAAGGTGGGAGAACTGAAGGATGACGACTTTGAGAA	var391	22GAAGTC37	3	0	0	23,24,25	-	-			62
CTTGAGGCCTTTCTTACCCAGAGG------GTGGGAGAACTGAAGGATGACGACTTTGAGAA	CTTGAGGCCTTTCTTACCCAGAAGCAGAAGGTGGGAGAACTGAAGGATGACGACTTTGAGAA	var801	22GA1-C-A-G-A-A-G32	1	0	6	23	-	25,26,27,28,29,30		25	62
CTTGAGGCCTTTCTTACCCAGAGGCAG---GTGGGAGAACTGAAGGATGACGACTTTGAGAA	CTTGAGGCCTTTCTTACCCAGAAGCAGAAGGTGGGAGAACTGAAGGATGACGACTTTGAGAA	var237	22GA4-A-A-G32	1	0	3	23	-	28,29,30		28	62
CTTGAGGCCTTTCTTACCCAGAGGCAGA--------GAACTGAAGGATGACGACTTTGAGAA	CTTGAGGCCTTTCTTACCCAGAAGCAGAAGGTGGGAGAACTGAAGGATGACGACTTTGAGAA	var1068	22GA5-A-G-G-T-G-G-G-A26	1	0	8	23	-	29,30,31,32,33,34,35,36		29	62
CTTGAGGCCTTTCTTACCCAGAGGCAGA-GGTGGGAGAACTGAAGGATGACGACTTTGAGAA	CTTGAGGCCTTTCTTACCCAGAAGCAGAAGGTGGGAGAACTGAAGGATGACGACTTTGAGAA	var577	22GA5-A33	1	0	1	23	-	29		29	62
CTTGAGGCCTTTCTTACCCAGAGGCAGAA----------CTGAAGGATGACGACTTTGAGAA	CTTGAGGCCTTTCTTACCCAGAAGCAGAAGGTGGGAGAACTGAAGGATGACGACTTTGAGAA	var726	22GA6-G-G-T-G-G-G-A-G-A-A23	1	0	10	23	-	30,31,32,33,34,35,36,37,38,39		30	62
CTTGAGGCCTTTCTTACCCAGAGGCAGAAAGGTGGGAGAACTGAAGGATGACGACTTTGAGA	CTTGAGGCCTTTCTTACCCAGAAGCAGAA-GGTGGGAGAACTGAAGGATGACGACTTTGAGA	var279	22GA6A-32	1	1	0	23	30	-	30		62
CTTGAGGCCTTTCTTACCCAGAGGCAGAAGGTGGGAGAACTAAAGGATGACGACTTTGAGAA	CTTGAGGCCTTTCTTACCCAGAAGCAGAAGGTGGGAGAACTGAAGGATGACGACTTTGAGAA	var366	22GA18AG20	2	0	0	23,42	-	-			62
CTTGAGGCCTTTCTTACCCAGAGGCAGAAGGTGGGAGAACTGAAGGATGACGACTTTGAGAA	CTTGAGGCCTTTCTTACCCAGAAGCAGAAGGTGGGAGAACTGAAGGATGACGACTTTGAGAA	var42	22GA39	1	0	0	23	-	-			62
CTTGAGGCCTTTCTTACCCAGAGGCCTTGCTTCTCCCAGGTGGGAGAACTGAAGGATGACGA	CTTGAGGCCTTTCTTACCCAGAAGCAGA---------AGGTGGGAGAACTGAAGGATGACGA	var490	22GA2CATGTAG-C-T-T-C-T-C-C-C-25	4	9	0	23,26,27,28	29,30,31,32,33,34,35,36,37	-	29		62
CTTGAGGCCTTTCTTACCCAGAGGTAGAAGGTGGGAGAACTAAAGGATGACGACTTTGAGAA	CTTGAGGCCTTTCTTACCCAGAAGCAGAAGGTGGGAGAACTGAAGGATGACGACTTTGAGAA	var506	22GA1TC16AG20	3	0	0	23,25,42	-	-			62
CTTGAGGCCTTTCTTACCCAGAGGTAGAAGGTGGGAGAACTGAAGGATGACGACTTTGAGAA	CTTGAGGCCTTTCTTACCCAGAAGCAGAAGGTGGGAGAACTGAAGGATGACGACTTTGAGAA	var615	22GA1TC37	2	0	0	23,25	-	-			62
CTTGAGGCCTTTCTTACCCAGATGCAGAAGGTGGGAGAACTGAAGGATGACGACTTTGAGAA	CTTGAGGCCTTTCTTACCCAGAAGCAGAAGGTGGGAGAACTGAAGGATGACGACTTTGAGAA	var707	22TA39	1	0	0	23	-	-			62
CTTGAGGCCTTTCTTACCCAGC-GCTTTCGTGGTGGGAGAACTGAAGGATGACGACTTTGAGA	CTTGAGGCCTTTCTTACCCAGAAGCAGAAG--GTGGGAGAACTGAAGGATGACGACTTTGAGA	var903	21CA-A2TATGTACA1T-G-31	5	2	1	22,26,27,28,29	31,32	23	31	23	63
CTTGAGGCCTTTCTTACCCAGCAG------GTGGGAGAACTGAAGGATGACGACTTTGAGAA	CTTGAGGCCTTTCTTACCCAGAAGCAGAAGGTGGGAGAACTGAAGGATGACGACTTTGAGAA	var206	21CA2-C-A-G-A-A-G32	1	0	6	22	-	25,26,27,28,29,30		25	62
CTTGAGGCCTTTCTTACCCAGCAGCAG---GTGGGAGAACTGAAGGATGACGACTTTGAGAA	CTTGAGGCCTTTCTTACCCAGAAGCAGAAGGTGGGAGAACTGAAGGATGACGACTTTGAGAA	var438	21CA5-A-A-G32	1	0	3	22	-	28,29,30		28	62
CTTGAGGCCTTTCTTACCCAGCAGCAGA-GGTGGGAGAACTGAAGGATGACGACTTTGAGAA	CTTGAGGCCTTTCTTACCCAGAAGCAGAAGGTGGGAGAACTGAAGGATGACGACTTTGAGAA	var1079	21CA6-A33	1	0	1	22	-	29		29	62
CTTGAGGCCTTTCTTACCCAGCAGCAGAA----------CTGAAGGATGACGACTTTGAGAA	CTTGAGGCCTTTCTTACCCAGAAGCAGAAGGTGGGAGAACTGAAGGATGACGACTTTGAGAA	var1178	21CA7-G-G-T-G-G-G-A-G-A-A23	1	0	10	22	-	30,31,32,33,34,35,36,37,38,39		30	62
CTTGAGGCCTTTCTTACCCAGCAGCAGAAAGGTGGGAGAACTGAAGGATGACGACTTTGAGA	CTTGAGGCCTTTCTTACCCAGAAGCAGAA-GGTGGGAGAACTGAAGGATGACGACTTTGAGA	var431	21CA7A-32	1	1	0	22	30	-	30		62
CTTGAGGCCTTTCTTACCCAGCAGCAGAAGGTGGGAGAACTGAAGGATGACGACTTTGAGAA	CTTGAGGCCTTTCTTACCCAGAAGCAGAAGGTGGGAGAACTGAAGGATGACGACTTTGAGAA	var114	21CA40	1	0	0	22	-	-			62
CTTGAGGCCTTTCTTACCCAGCTG-----------AGAACTGAAGGATGACGACTTTGAGAA	CTTGAGGCCTTTCTTACCCAGAAGCAGAAGGTGGGAGAACTGAAGGATGACGACTTTGAGAA	var627	21CATA1-C-A-G-A-A-G-G-T-G-G-G27	2	0	11	22,23	-	25,26,27,28,29,30,31,32,33,34,35		25	62
CTTGAGGCCTTTCTTACCCAGGAG---------GGAGAACTGAAGGATGACGACTTTGAGAA	CTTGAGGCCTTTCTTACCCAGAAGCAGAAGGTGGGAGAACTGAAGGATGACGACTTTGAGAA	var694	21GA2-C-A-G-A-A-G-G-T-G29	1	0	9	22	-	25,26,27,28,29,30,31,32,33		25	62
CTTGAGGCCTTTCTTACCCAGGAG------GTGGGAGAACTGAAGGATGACGACTTTGAGAA	CTTGAGGCCTTTCTTACCCAGAAGCAGAAGGTGGGAGAACTGAAGGATGACGACTTTGAGAA	var1256	21GA2-C-A-G-A-A-G32	1	0	6	22	-	25,26,27,28,29,30		25	62
CTTGAGGCCTTTCTTACCCAGGAGAACTTTCTTACTTCAGGAGAACTGAAGGATGACGACTT	CTTGAGGCCTTTCTTACCCAGAAGCAGAAGGTG------GGAGAACTGAAGGATGACGACTT	var949	21GA2AC1CGTATATGCG1TGA-C-T-T-C-A-23	8	6	0	22,25,27,28,29,30,31,33	34,35,36,37,38,39	-	34		62
CTTGAGGCCTTTCTTACCCAGGAGCAG---GTGGGAGAACTGAAGGATGACGACTTTGAGAA	CTTGAGGCCTTTCTTACCCAGAAGCAGAAGGTGGGAGAACTGAAGGATGACGACTTTGAGAA	var342	21GA5-A-A-G32	1	0	3	22	-	28,29,30		28	62
CTTGAGGCCTTTCTTACCCAGGAGCAGA--------GAACTGAAGGATGACGACTTTGAGAA	CTTGAGGCCTTTCTTACCCAGAAGCAGAAGGTGGGAGAACTGAAGGATGACGACTTTGAGAA	var1602	21GA6-A-G-G-T-G-G-G-A26	1	0	8	22	-	29,30,31,32,33,34,35,36		29	62
CTTGAGGCCTTTCTTACCCAGGAGCAGA-GGTGGGAGAACTGAAGGATGACGACTTTGAGAA	CTTGAGGCCTTTCTTACCCAGAAGCAGAAGGTGGGAGAACTGAAGGATGACGACTTTGAGAA	var864	21GA6-A33	1	0	1	22	-	29		29	62
CTTGAGGCCTTTCTTACCCAGGAGCAGAA----------CTGAAGGATGACGACTTTGAGAA	CTTGAGGCCTTTCTTACCCAGAAGCAGAAGGTGGGAGAACTGAAGGATGACGACTTTGAGAA	var1056	21GA7-G-G-T-G-G-G-A-G-A-A23	1	0	10	22	-	30,31,32,33,34,35,36,37,38,39		30	62
CTTGAGGCCTTTCTTACCCAGGAGCAGAAAGGTGGGAGAACTGAAGGATGACGACTTTGAGA	CTTGAGGCCTTTCTTACCCAGAAGCAGAA-GGTGGGAGAACTGAAGGATGACGACTTTGAGA	var317	21GA7A-32	1	1	0	22	30	-	30		62
CTTGAGGCCTTTCTTACCCAGGAGCAGAAGGTGGGAGAACTGAAGGATGACGACTTTGAGAA	CTTGAGGCCTTTCTTACCCAGAAGCAGAAGGTGGGAGAACTGAAGGATGACGACTTTGAGAA	var89	21GA40	1	0	0	22	-	-			62
CTTGAGGCCTTTCTTACCCAGGCCTTTCTTACCAGAAGGTGGGAGAACTGAAGGATGACGAC	CTTGAGGCCTTTCTTACCCAGA--------AGCAGAAGGTGGGAGAACTGAAGGATGACGAC	var806	21GAC-C-T-T-T-C-T-T-1CG30	2	8	0	22,31	23,24,25,26,27,28,29,30	-	23		62
CTTGAGGCCTTTCTTACCCAGTAGCAG---GTGGGAGAACTGAAGGATGACGACTTTGAGAA	CTTGAGGCCTTTCTTACCCAGAAGCAGAAGGTGGGAGAACTGAAGGATGACGACTTTGAGAA	var1255	21TA5-A-A-G32	1	0	3	22	-	28,29,30		28	62
CTTGAGGCCTTTCTTACCCAGTAGCAGAAAGGTGGGAGAACTGAAGGATGACGACTTTGAGA	CTTGAGGCCTTTCTTACCCAGAAGCAGAA-GGTGGGAGAACTGAAGGATGACGACTTTGAGA	var1155	21TA7A-32	1	1	0	22	30	-	30		62
CTTGAGGCCTTTCTTACCCAGTAGCAGAAGGTGGGAGAACTGAAGGATGACGACTTTGAGAA	CTTGAGGCCTTTCTTACCCAGAAGCAGAAGGTGGGAGAACTGAAGGATGACGACTTTGAGAA	var370	21TA40	1	0	0	22	-	-			62
CTTGAGGCCTTTCTTACCCAGTT-CTCA--GTGGGAGAACTGAAGGATGACGACTTTGAGAA	CTTGAGGCCTTTCTTACCCAGAAGCAGAAGGTGGGAGAACTGAAGGATGACGACTTTGAGAA	var1116	21TATA-G1TACG1-A-G32	4	0	3	22,23,24,25	-	24,29,30		24	62
CTTGAGGCCTTTCTTACCCAGTT-CTCCAGATGGGAGAACTGAAGGATGACGACTTTGAGAA	CTTGAGGCCTTTCTTACCCAGAAGCAGAAGGTGGGAGAACTGAAGGATGACGACTTTGAGAA	var668	21TATA-G1TACGCA2AG31	6	0	1	22,23,24,25,26,29	-	24		24	62
CTTGAGGCCTTTCTTACCCAGTTC----AGGTGGGAGAACTGAAGGATGACGACTTTGAGAA	CTTGAGGCCTTTCTTACCCAGAAGCAGAAGGTGGGAGAACTGAAGGATGACGACTTTGAGAA	var992	21TATACG-C-A-G-A34	3	0	4	22,23,24	-	25,26,27,28		25	62
CTTGAGGCCTTTCTTACCCAGTTCTCCCAGGTGGGAGAACTGAAGGATGACGACTTTGAGAA	CTTGAGGCCTTTCTTACCCAGAAGCAGAAGGTGGGAGAACTGAAGGATGACGACTTTGAGAA	var710	21TATACGTCCACGCA34	7	0	0	22,23,24,25,26,27,28	-	-			62
CTTGAGGCCTTTCTTACCCATC--CTTCAGGTGGGAGAACTGAAGGATGACGACTTTGAGAA	CTTGAGGCCTTTCTTACCCAGAAGCAGAAGGTGGGAGAACTGAAGGATGACGACTTTGAGAA	var1345	20TGCA-A-G1TATGCA34	5	0	2	21,22,24,25,26	-	23,24		23	62
CTTGAGGCCTTTCTTACCCATCTGCTTCTGGTGGGAGAACTGAAGGATGACGACTTTGAGAA	CTTGAGGCCTTTCTTACCCAGAAGCAGAAGGTGGGAGAACTGAAGGATGACGACTTTGAGAA	var825	20TGCATA2TATGCATA33	7	0	0	21,22,23,26,27,28,29	-	-			62
CTTGAGGCCTTTCTTACCCATTTA-ACAAGGTGGGAGAACTGAAGGATGACGACTTTGAGAA	CTTGAGGCCTTTCTTACCCAGAAGCAGAAGGTGGGAGAACTGAAGGATGACGACTTTGAGAA	var1163	20TGTATAAG-C1CG35	5	0	1	21,22,23,24,23	-	25		25	62
CTTGAGGCCTTTCTTACCCCGAAGCAG---GTGGGAGAACTGAAGGATGACGACTTTGAGAA	CTTGAGGCCTTTCTTACCCAGAAGCAGAAGGTGGGAGAACTGAAGGATGACGACTTTGAGAA	var984	19CA7-A-A-G32	1	0	3	20	-	28,29,30		28	62
CTTGAGGCCTTTCTTACCCCGAAGCAGAAAGGTGGGAGAACTGAAGGATGACGACTTTGAGA	CTTGAGGCCTTTCTTACCCAGAAGCAGAA-GGTGGGAGAACTGAAGGATGACGACTTTGAGA	var1098	19CA9A-32	1	1	0	20	30	-	30		62
CTTGAGGCCTTTCTTACCCCGAAGCAGAAGGTGGGAGAACTGAAGGATGACGACTTTGAGAA	CTTGAGGCCTTTCTTACCCAGAAGCAGAAGGTGGGAGAACTGAAGGATGACGACTTTGAGAA	var233	19CA42	1	0	0	20	-	-			62
CTTGAGGCCTTTCTTACCCGGA	CTTGAGGCCTTTCTTACCCAGA	var1162	19GA2	1	0	0	20	-	-			22
CTTGAGGCCTTTCTTACCCGGAAG------GTGGGAGAACTGAAGGATGACGACTTTGAGAA	CTTGAGGCCTTTCTTACCCAGAAGCAGAAGGTGGGAGAACTGAAGGATGACGACTTTGAGAA	var1335	19GA4-C-A-G-A-A-G32	1	0	6	20	-	25,26,27,28,29,30		25	62
CTTGAGGCCTTTCTTACCCGGAAGCAG---GTGGGAGAACTGAAGGATGACGACTTTGAGAA	CTTGAGGCCTTTCTTACCCAGAAGCAGAAGGTGGGAGAACTGAAGGATGACGACTTTGAGAA	var308	19GA7-A-A-G32	1	0	3	20	-	28,29,30		28	62
CTTGAGGCCTTTCTTACCCGGAAGCAGA-GGTGGGAGAACTGAAGGATGACGACTTTGAGAA	CTTGAGGCCTTTCTTACCCAGAAGCAGAAGGTGGGAGAACTGAAGGATGACGACTTTGAGAA	var765	19GA8-A33	1	0	1	20	-	29		29	62
CTTGAGGCCTTTCTTACCCGGAAGCAGAA----------CTGAAGGATGACGACTTTGAGAA	CTTGAGGCCTTTCTTACCCAGAAGCAGAAGGTGGGAGAACTGAAGGATGACGACTTTGAGAA	var1101	19GA9-G-G-T-G-G-G-A-G-A-A23	1	0	10	20	-	30,31,32,33,34,35,36,37,38,39		30	62
CTTGAGGCCTTTCTTACCCGGAAGCAGAAAGGTGGGAGAACTGAAGGATGACGACTTTGAGA	CTTGAGGCCTTTCTTACCCAGAAGCAGAA-GGTGGGAGAACTGAAGGATGACGACTTTGAGA	var367	19GA9A-32	1	1	0	20	30	-	30		62
CTTGAGGCCTTTCTTACCCGGAAGCAGAAGGTGGGAGAACTGAAGGATGACGACTTTGAGAA	CTTGAGGCCTTTCTTACCCAGAAGCAGAAGGTGGGAGAACTGAAGGATGACGACTTTGAGAA	var96	19GA42	1	0	0	20	-	-			62
CTTGAGGCCTTTCTTACCCTGA	CTTGAGGCCTTTCTTACCCAGA	var1449	19TA2	1	0	0	20	-	-			22
CTTGAGGCCTTTCTTACCCTGAAG	CTTGAGGCCTTTCTTACCCAGAAG	var33	19TA4	1	0	0	20	-	-			24
CTTGAGGCCTTTCTTACCCTGAAGCAG---GTGGGAGAACTGAAGGATGACGACTTTGAGAA	CTTGAGGCCTTTCTTACCCAGAAGCAGAAGGTGGGAGAACTGAAGGATGACGACTTTGAGAA	var922	19TA7-A-A-G32	1	0	3	20	-	28,29,30		28	62
CTTGAGGCCTTTCTTACCCTGAAGCAGAAAGGTGGGAGAACTGAAGGATGACGACTTTGAGA	CTTGAGGCCTTTCTTACCCAGAAGCAGAA-GGTGGGAGAACTGAAGGATGACGACTTTGAGA	var1402	19TA9A-32	1	1	0	20	30	-	30		62
CTTGAGGCCTTTCTTACCCTGAAGCAGAAGGTGGGAGAACTGAAGGATGACGACTTTGAGAA	CTTGAGGCCTTTCTTACCCAGAAGCAGAAGGTGGGAGAACTGAAGGATGACGACTTTGAGAA	var270	19TA42	1	0	0	20	-	-			62
CTTGAGGCCTTTCTTACCCTTCAG------GTGGGAGAACTGAAGGATGACGACTTTGAGAA	CTTGAGGCCTTTCTTACCCAGAAGCAGAAGGTGGGAGAACTGAAGGATGACGACTTTGAGAA	var1003	19TATGCA2-C-A-G-A-A-G32	3	0	6	20,21,22	-	25,26,27,28,29,30		25	62
CTTGAGGCCTTTCTTACCTAGAAGCAG---GTGGGAGAACTGAAGGATGACGACTTTGAGAA	CTTGAGGCCTTTCTTACCCAGAAGCAGAAGGTGGGAGAACTGAAGGATGACGACTTTGAGAA	var819	18TC8-A-A-G32	1	0	3	19	-	28,29,30		28	62
CTTGAGGCCTTTCTTACCTAGAAGCAGA-GGTGGGAGAACTGAAGGATGACGACTTTGAGAA	CTTGAGGCCTTTCTTACCCAGAAGCAGAAGGTGGGAGAACTGAAGGATGACGACTTTGAGAA	var1634	18TC9-A33	1	0	1	19	-	29		29	62
CTTGAGGCCTTTCTTACCTAGAAGCAGAAAGGTGGGAGAACTGAAGGATGACGACTTTGAGA	CTTGAGGCCTTTCTTACCCAGAAGCAGAA-GGTGGGAGAACTGAAGGATGACGACTTTGAGA	var757	18TC10A-32	1	1	0	19	30	-	30		62
CTTGAGGCCTTTCTTACCTAGAAGCAGAAGGTGGGAGAACTGAAGGATGACGACTTTGAGAA	CTTGAGGCCTTTCTTACCCAGAAGCAGAAGGTGGGAGAACTGAAGGATGACGACTTTGAGAA	var195	18TC43	1	0	0	19	-	-			62
CTTGAGGCCTTTCTTACCTC-------AAGGTGGGAGAACTGAAGGATGACGACTTTGAGAA	CTTGAGGCCTTTCTTACCCAGAAGCAGAAGGTGGGAGAACTGAAGGATGACGACTTTGAGAA	var781	18TCCA-G-A-A-G-C-A-G35	2	0	7	19,20	-	21,22,23,24,25,26,27		21	62
CTTGAGGCCTTTCTTACCTC-AAGAAGAAAG---GAGAACTGAAGGATGACGACTTTGAGAA	CTTGAGGCCTTTCTTACCCAGAAGCAGAAGGTGGGAGAACTGAAGGATGACGACTTTGAGAA	var752	18TCCA-G3AC4AG1-T-G-G28	4	0	4	19,20,23,28	-	21,32,33,34		21	62
CTTGAGGCCTTTCTTACCTT--------AGGTGGGAGAACTGAAGGATGACGACTTTGAGAA	CTTGAGGCCTTTCTTACCCAGAAGCAGAAGGTGGGAGAACTGAAGGATGACGACTTTGAGAA	var1187	18TCTA-G-A-A-G-C-A-G-A34	2	0	8	19,20	-	21,22,23,24,25,26,27,28		21	62
CTTGAGGCCTTTCTTACGCAGAAGCAGAAGGTGGGAGAACTGAAGGATGACGACTTTGAGAA	CTTGAGGCCTTTCTTACCCAGAAGCAGAAGGTGGGAGAACTGAAGGATGACGACTTTGAGAA	var1590	17GC44	1	0	0	18	-	-			62
CTTGAGGCCTTTCTTACTCAGAAGCAG---GTGGGAGAACTGAAGGATGACGACTTTGAGAA	CTTGAGGCCTTTCTTACCCAGAAGCAGAAGGTGGGAGAACTGAAGGATGACGACTTTGAGAA	var666	17TC9-A-A-G32	1	0	3	18	-	28,29,30		28	62
CTTGAGGCCTTTCTTACTCAGAAGCAGA-GGTGGGAGAACTGAAGGATGACGACTTTGAGAA	CTTGAGGCCTTTCTTACCCAGAAGCAGAAGGTGGGAGAACTGAAGGATGACGACTTTGAGAA	var1558	17TC10-A33	1	0	1	18	-	29		29	62
CTTGAGGCCTTTCTTACTCAGAAGCAGAAAGGTGGGAGAACTGAAGGATGACGACTTTGAGA	CTTGAGGCCTTTCTTACCCAGAAGCAGAA-GGTGGGAGAACTGAAGGATGACGACTTTGAGA	var637	17TC11A-32	1	1	0	18	30	-	30		62
CTTGAGGCCTTTCTTACTCAGAAGCAGAAGGTGGGAGAACTGAAGGATGACGACTTTGAGAA	CTTGAGGCCTTTCTTACCCAGAAGCAGAAGGTGGGAGAACTGAAGGATGACGACTTTGAGAA	var173	17TC44	1	0	0	18	-	-			62
CTTGAGGCCTTTCTTAGCCAGAAGCAGAAGGTGGGAGAACTGAAGGATGACGACTTTGAGAA	CTTGAGGCCTTTCTTACCCAGAAGCAGAAGGTGGGAGAACTGAAGGATGACGACTTTGAGAA	var1008	16GC45	1	0	0	17	-	-			62
CTTGAGGCCTTTCTTATCCAGA------AGGTGGGAGAACTGAAGGATGACGACTTTGAGAA	CTTGAGGCCTTTCTTACCCAGAAGCAGAAGGTGGGAGAACTGAAGGATGACGACTTTGAGAA	var936	16TC5-A-G-C-A-G-A34	1	0	6	17	-	23,24,25,26,27,28		23	62
CTTGAGGCCTTTCTTATCCAGAAGCAG---GTGGGAGAACTGAAGGATGACGACTTTGAGAA	CTTGAGGCCTTTCTTACCCAGAAGCAGAAGGTGGGAGAACTGAAGGATGACGACTTTGAGAA	var910	16TC10-A-A-G32	1	0	3	17	-	28,29,30		28	62
CTTGAGGCCTTTCTTATCCAGAAGCAGAAAGGTGGGAGAACTGAAGGATGACGACTTTGAGA	CTTGAGGCCTTTCTTACCCAGAAGCAGAA-GGTGGGAGAACTGAAGGATGACGACTTTGAGA	var767	16TC12A-32	1	1	0	17	30	-	30		62
CTTGAGGCCTTTCTTATCCAGAAGCAGAAGGTGGGAGAACTGAAGGATGACGACTTTGAGAA	CTTGAGGCCTTTCTTACCCAGAAGCAGAAGGTGGGAGAACTGAAGGATGACGACTTTGAGAA	var258	16TC45	1	0	0	17	-	-			62
CTTGAGGCCTTTCTTATCTAG---------GTGGGAGAACTGAAGGATGACGACTTTGAGAA	CTTGAGGCCTTTCTTACCCAGAAGCAGAAGGTGGGAGAACTGAAGGATGACGACTTTGAGAA	var782	16TC1TC2-A-A-G-C-A-G-A-A-G32	2	0	9	17,19	-	22,23,24,25,26,27,28,29,30		22	62
CTTGAGGCCTTTCTTCCC----------AGGTGGGAGAACTGAAGGATGACGACTTTGAGAA	CTTGAGGCCTTTCTTACCCAGAAGCAGAAGGTGGGAGAACTGAAGGATGACGACTTTGAGAA	var1312	15CA2-C-A-G-A-A-G-C-A-G-A34	1	0	10	16	-	19,20,21,22,23,24,25,26,27,28		19	62
CTTGAGGCCTTTCTTCCCAAG	CTTGAGGCCTTTCTTACCCAG	var1347	15CA2AC2	2	0	0	16,19	-	-			21
CTTGAGGCCTTTCTTCCCAAGAAGCAG---GTGGGAGAACTGAAGGATGACGACTTTGAGAA	CTTGAGGCCTTTCTTACCCAGAAGCAGAAGGTGGGAGAACTGAAGGATGACGACTTTGAGAA	var1485	15CA2AC8-A-A-G32	2	0	3	16,19	-	28,29,30		28	62
CTTGAGGCCTTTCTTCCCAAGAAGCAGAAAGGTGGGAGAACTGAAGGATGACGACTTTGAGA	CTTGAGGCCTTTCTTACCCAGAAGCAGAA-GGTGGGAGAACTGAAGGATGACGACTTTGAGA	var1389	15CA2AC10A-32	2	1	0	16,19	30	-	30		62
CTTGAGGCCTTTCTTCCCAAGAAGCAGAAGGTGGGAGAACTGAAGGATGACGACTTTGAGAA	CTTGAGGCCTTTCTTACCCAGAAGCAGAAGGTGGGAGAACTGAAGGATGACGACTTTGAGAA	var346	15CA2AC43	2	0	0	16,19	-	-			62
CTTGAGGCCTTTCTTCCCAAGAAGCAGAAGGTGGGAGAACTGAAGGATGCCGACTTTGAGAA	CTTGAGGCCTTTCTTACCCAGAAGCAGAAGGTGGGAGAACTGAAGGATGACGACTTTGAGAA	var1154	15CA2AC30CA12	3	0	0	16,19,50	-	-			62
CTTGAGGCCTTTCTTCCCCAG---------GTGGGAGAACTGAAGGATGACGACTTTGAGAA	CTTGAGGCCTTTCTTACCCAGAAGCAGAAGGTGGGAGAACTGAAGGATGACGACTTTGAGAA	var1262	15CA5-A-A-G-C-A-G-A-A-G32	1	0	9	16	-	22,23,24,25,26,27,28,29,30		22	62
CTTGAGGCCTTTCTTCCCCAGA------AGGTGGGAGAACTGAAGGATGACGACTTTGAGAA	CTTGAGGCCTTTCTTACCCAGAAGCAGAAGGTGGGAGAACTGAAGGATGACGACTTTGAGAA	var659	15CA6-A-G-C-A-G-A34	1	0	6	16	-	23,24,25,26,27,28		23	62
CTTGAGGCCTTTCTTCCCCAGAA	CTTGAGGCCTTTCTTACCCAGAA	var1474	15CA7	1	0	0	16	-	-			23
CTTGAGGCCTTTCTTCCCCAGAAGAAGAAGGTGGGAGAACTGAAGGATGACGACTTTGAGAA	CTTGAGGCCTTTCTTACCCAGAAGCAGAAGGTGGGAGAACTGAAGGATGACGACTTTGAGAA	var845	15CA8AC37	2	0	0	16,25	-	-			62
CTTGAGGCCTTTCTTCCCCAGAAGCAG---GTGGGAGAACTGAAGGATGACGACTTTGAGAA	CTTGAGGCCTTTCTTACCCAGAAGCAGAAGGTGGGAGAACTGAAGGATGACGACTTTGAGAA	var294	15CA11-A-A-G32	1	0	3	16	-	28,29,30		28	62
CTTGAGGCCTTTCTTCCCCAGAAGCAGA-GGTGGGAGAACTGAAGGATGACGACTTTGAGAA	CTTGAGGCCTTTCTTACCCAGAAGCAGAAGGTGGGAGAACTGAAGGATGACGACTTTGAGAA	var542	15CA12-A33	1	0	1	16	-	29		29	62
CTTGAGGCCTTTCTTCCCCAGAAGCAGAA----------CTGAAGGATGACGACTTTGAGAA	CTTGAGGCCTTTCTTACCCAGAAGCAGAAGGTGGGAGAACTGAAGGATGACGACTTTGAGAA	var613	15CA13-G-G-T-G-G-G-A-G-A-A23	1	0	10	16	-	30,31,32,33,34,35,36,37,38,39		30	62
CTTGAGGCCTTTCTTCCCCAGAAGCAGAAAGGTGGGAGAACTGAAGGATGACGACTTTGAGA	CTTGAGGCCTTTCTTACCCAGAAGCAGAA-GGTGGGAGAACTGAAGGATGACGACTTTGAGA	var182	15CA13A-32	1	1	0	16	30	-	30		62
CTTGAGGCCTTTCTTCCCCAGAAGCAGAAAGGTGGGAGCACTGAAGGATGACGACTTTGAGA	CTTGAGGCCTTTCTTACCCAGAAGCAGAA-GGTGGGAGAACTGAAGGATGACGACTTTGAGA	var1117	15CA13A-8CA23	2	1	0	16,39	30	-	30		62
CTTGAGGCCTTTCTTCCCCAGAAGCAGAAGGTGGGAGAACTGAAGGATGACGACTTTGAGAA	CTTGAGGCCTTTCTTACCCAGAAGCAGAAGGTGGGAGAACTGAAGGATGACGACTTTGAGAA	var45	15CA46	1	0	0	16	-	-			62
CTTGAGGCCTTTCTTCCCCAGAAGCAGAAGGTGGGAGAACTGAAGGATGACGCCTTTGAGAA	CTTGAGGCCTTTCTTACCCAGAAGCAGAAGGTGGGAGAACTGAAGGATGACGACTTTGAGAA	var569	15CA36CA9	2	0	0	16,53	-	-			62
CTTGAGGCCTTTCTTCCCCAGAAGCAGAAGGTGGGAGAACTGAAGGATGCCGACTTTGAGAA	CTTGAGGCCTTTCTTACCCAGAAGCAGAAGGTGGGAGAACTGAAGGATGACGACTTTGAGAA	var876	15CA33CA12	2	0	0	16,50	-	-			62
CTTGAGGCCTTTCTTCCCCAGAAGCAGAAGGTGGGAGACCTGAAGGATGACGACTTTGAGAA	CTTGAGGCCTTTCTTACCCAGAAGCAGAAGGTGGGAGAACTGAAGGATGACGACTTTGAGAA	var1095	15CA22CA23	2	0	0	16,39	-	-			62
CTTGAGGCCTTTCTTGCCCAGA------AGGTGGGAGAACTGAAGGATGACGACTTTGAGAA	CTTGAGGCCTTTCTTACCCAGAAGCAGAAGGTGGGAGAACTGAAGGATGACGACTTTGAGAA	var1441	15GA6-A-G-C-A-G-A34	1	0	6	16	-	23,24,25,26,27,28		23	62
CTTGAGGCCTTTCTTGCCCAGAAGCAG---GTGGGAGAACTGAAGGATGACGACTTTGAGAA	CTTGAGGCCTTTCTTACCCAGAAGCAGAAGGTGGGAGAACTGAAGGATGACGACTTTGAGAA	var410	15GA11-A-A-G32	1	0	3	16	-	28,29,30		28	62
CTTGAGGCCTTTCTTGCCCAGAAGCAGA-GGTGGGAGAACTGAAGGATGACGACTTTGAGAA	CTTGAGGCCTTTCTTACCCAGAAGCAGAAGGTGGGAGAACTGAAGGATGACGACTTTGAGAA	var1254	15GA12-A33	1	0	1	16	-	29		29	62
CTTGAGGCCTTTCTTGCCCAGAAGCAGAA----------CTGAAGGATGACGACTTTGAGAA	CTTGAGGCCTTTCTTACCCAGAAGCAGAAGGTGGGAGAACTGAAGGATGACGACTTTGAGAA	var1379	15GA13-G-G-T-G-G-G-A-G-A-A23	1	0	10	16	-	30,31,32,33,34,35,36,37,38,39		30	62
CTTGAGGCCTTTCTTGCCCAGAAGCAGAAAGGTGGGAGAACTGAAGGATGACGACTTTGAGA	CTTGAGGCCTTTCTTACCCAGAAGCAGAA-GGTGGGAGAACTGAAGGATGACGACTTTGAGA	var441	15GA13A-32	1	1	0	16	30	-	30		62
CTTGAGGCCTTTCTTGCCCAGAAGCAGAAGGTGGGAGAACTGAAGGATGACGACTTTGAGAA	CTTGAGGCCTTTCTTACCCAGAAGCAGAAGGTGGGAGAACTGAAGGATGACGACTTTGAGAA	var115	15GA46	1	0	0	16	-	-			62
CTTGAGGCCTTTCTTTCCCAGAAGCAGAAGGTGGGAGAACTGAAGGATGACGACTTTGAGAA	CTTGAGGCCTTTCTTACCCAGAAGCAGAAGGTGGGAGAACTGAAGGATGACGACTTTGAGAA	var945	15TA46	1	0	0	16	-	-			62
CTTGAGGCCTTTTCTTACCCAGAAGCAG---GTGGGAGAACTGAAGGATGACGACTTTGAGAA	CTTGAGGCCTTT-CTTACCCAGAAGCAGAAGGTGGGAGAACTGAAGGATGACGACTTTGAGAA	var304	12T-15-A-A-G32	0	1	0	-	13	-	13		63
CTTGAGGCCTTTTTTACCCAGAAG	CTTGAGGCCTTTCTTACCCAGAAG	var1346	12TC11	1	0	0	13	-	-			24
CTTGAGGCCTTTTTTACCCAGAAGCAG---GTGGGAGAACTGAAGGATGACGACTTTGAGAA	CTTGAGGCCTTTCTTACCCAGAAGCAGAAGGTGGGAGAACTGAAGGATGACGACTTTGAGAA	var1067	12TC14-A-A-G32	1	0	3	13	-	28,29,30		28	62
CTTGAGGCCTTTTTTACCCAGAAGCAGAAAGGTGGGAGAACTGAAGGATGACGACTTTGAGA	CTTGAGGCCTTTCTTACCCAGAAGCAGAA-GGTGGGAGAACTGAAGGATGACGACTTTGAGA	var1110	12TC16A-32	1	1	0	13	30	-	30		62
CTTGAGGCCTTTTTTACCCAGAAGCAGAAGGTGGGAGAACTGAAGGATGACGACTTTGAGAA	CTTGAGGCCTTTCTTACCCAGAAGCAGAAGGTGGGAGAACTGAAGGATGACGACTTTGAGAA	var427	12TC49	1	0	0	13	-	-			62
CTTGAGGCTTTTCTTACCCAGA------AGGTGGGAGAACTGAAGGATGACGACTTTGAGAA	CTTGAGGCCTTTCTTACCCAGAAGCAGAAGGTGGGAGAACTGAAGGATGACGACTTTGAGAA	var1444	8TC13-A-G-C-A-G-A34	1	0	6	9	-	23,24,25,26,27,28		23	62
CTTGAGGCTTTTCTTACCCAGAAGCAG---GTGGGAGAACTGAAGGATGACGACTTTGAGAA	CTTGAGGCCTTTCTTACCCAGAAGCAGAAGGTGGGAGAACTGAAGGATGACGACTTTGAGAA	var719	8TC18-A-A-G32	1	0	3	9	-	28,29,30		28	62
CTTGAGGCTTTTCTTACCCAGAAGCAGA-GGTGGGAGAACTGAAGGATGACGACTTTGAGAA	CTTGAGGCCTTTCTTACCCAGAAGCAGAAGGTGGGAGAACTGAAGGATGACGACTTTGAGAA	var1032	8TC19-A33	1	0	1	9	-	29		29	62
CTTGAGGCTTTTCTTACCCAGAAGCAGAAAGGTGGGAGAACTGAAGGATGACGACTTTGAGA	CTTGAGGCCTTTCTTACCCAGAAGCAGAA-GGTGGGAGAACTGAAGGATGACGACTTTGAGA	var673	8TC20A-32	1	1	0	9	30	-	30		62
CTTGAGGCTTTTCTTACCCAGAAGCAGAAGGTGGGAGAACTGAAGGATGACGACTTTGAGAA	CTTGAGGCCTTTCTTACCCAGAAGCAGAAGGTGGGAGAACTGAAGGATGACGACTTTGAGAA	var170	8TC53	1	0	0	9	-	-			62
CTTGAGGTCTTTCTTACCCAGA------AGGTGGGAGAACTGAAGGATGACGACTTTGAGAA	CTTGAGGCCTTTCTTACCCAGAAGCAGAAGGTGGGAGAACTGAAGGATGACGACTTTGAGAA	var1337	7TC14-A-G-C-A-G-A34	1	0	6	8	-	23,24,25,26,27,28		23	62
CTTGAGGTCTTTCTTACCCAGAAGCAG---GTGGGAGAACTGAAGGATGACGACTTTGAGAA	CTTGAGGCCTTTCTTACCCAGAAGCAGAAGGTGGGAGAACTGAAGGATGACGACTTTGAGAA	var190	7TC19-A-A-G32	1	0	3	8	-	28,29,30		28	62
CTTGAGGTCTTTCTTACCCAGAAGCAGA-GGTGGGAGAACTGAAGGATGACGACTTTGAGAA	CTTGAGGCCTTTCTTACCCAGAAGCAGAAGGTGGGAGAACTGAAGGATGACGACTTTGAGAA	var1012	7TC20-A33	1	0	1	8	-	29		29	62
CTTGAGGTCTTTCTTACCCAGAAGCAGAA----------CTGAAGGATGACGACTTTGAGAA	CTTGAGGCCTTTCTTACCCAGAAGCAGAAGGTGGGAGAACTGAAGGATGACGACTTTGAGAA	var1114	7TC21-G-G-T-G-G-G-A-G-A-A23	1	0	10	8	-	30,31,32,33,34,35,36,37,38,39		30	62
CTTGAGGTCTTTCTTACCCAGAAGCAGAAAGGTGGGAGAACTGAAGGATGACGACTTTGAGA	CTTGAGGCCTTTCTTACCCAGAAGCAGAA-GGTGGGAGAACTGAAGGATGACGACTTTGAGA	var457	7TC21A-32	1	1	0	8	30	-	30		62
CTTGAGGTCTTTCTTACCCAGAAGCAGAAGGTGGGAGAACTGAAGGATGACGACTTTGAGAA	CTTGAGGCCTTTCTTACCCAGAAGCAGAAGGTGGGAGAACTGAAGGATGACGACTTTGAGAA	var136	7TC54	1	0	0	8	-	-			62
CTTGAGTCCTTTCTTACCCAGAAGCAGAAGGTGGGAGAACTGAAGGATGACGACTTTGAGAA	CTTGAGGCCTTTCTTACCCAGAAGCAGAAGGTGGGAGAACTGAAGGATGACGACTTTGAGAA	var1431	6TG55	1	0	0	7	-	-			62
CTTGATGCCTTTCTTACCCAGAAGCAGAAGGTGGGAGAACTGAAGGATGACGACTTTGAGAA	CTTGAGGCCTTTCTTACCCAGAAGCAGAAGGTGGGAGAACTGAAGGATGACGACTTTGAGAA	var722	5TG56	1	0	0	6	-	-			62
CTTGCGGCCTTTCTTACCCAGAAGCAG---GTGGGAGAACTGAAGGATGACGACTTTGAGAA	CTTGAGGCCTTTCTTACCCAGAAGCAGAAGGTGGGAGAACTGAAGGATGACGACTTTGAGAA	var1096	4CA22-A-A-G32	1	0	3	5	-	28,29,30		28	62
CTTGCGGCCTTTCTTACCCAGAAGCAGAAAGGTGGGAGAACTGAAGGATGACGACTTTGAGA	CTTGAGGCCTTTCTTACCCAGAAGCAGAA-GGTGGGAGAACTGAAGGATGACGACTTTGAGA	var1250	4CA24A-32	1	1	0	5	30	-	30		62
CTTGCGGCCTTTCTTACCCAGAAGCAGAAGGTGGGAGAACTGAAGGATGACGACTTTGAGAA	CTTGAGGCCTTTCTTACCCAGAAGCAGAAGGTGGGAGAACTGAAGGATGACGACTTTGAGAA	var281	4CA57	1	0	0	5	-	-			62
CTTGGGGCCTTTCTTACCCAG---------GTGGGAGAACTGAAGGATGACGACTTTGAGAA	CTTGAGGCCTTTCTTACCCAGAAGCAGAAGGTGGGAGAACTGAAGGATGACGACTTTGAGAA	var1517	4GA16-A-A-G-C-A-G-A-A-G32	1	0	9	5	-	22,23,24,25,26,27,28,29,30		22	62
CTTGGGGCCTTTCTTACCCAGA------AGGTGGGAGAACTGAAGGATGACGACTTTGAGAA	CTTGAGGCCTTTCTTACCCAGAAGCAGAAGGTGGGAGAACTGAAGGATGACGACTTTGAGAA	var830	4GA17-A-G-C-A-G-A34	1	0	6	5	-	23,24,25,26,27,28		23	62
CTTGGGGCCTTTCTTACCCAGAA	CTTGAGGCCTTTCTTACCCAGAA	var1401	4GA18	1	0	0	5	-	-			23
CTTGGGGCCTTTCTTACCCAGAAGCAG---GTGGGAGAACTGAAGGATGACGACTTTGAGAA	CTTGAGGCCTTTCTTACCCAGAAGCAGAAGGTGGGAGAACTGAAGGATGACGACTTTGAGAA	var310	4GA22-A-A-G32	1	0	3	5	-	28,29,30		28	62
CTTGGGGCCTTTCTTACCCAGAAGCAGA-GGTGGGAGAACTGAAGGATGACGACTTTGAGAA	CTTGAGGCCTTTCTTACCCAGAAGCAGAAGGTGGGAGAACTGAAGGATGACGACTTTGAGAA	var800	4GA23-A33	1	0	1	5	-	29		29	62
CTTGGGGCCTTTCTTACCCAGAAGCAGAA----------CTGAAGGATGACGACTTTGAGAA	CTTGAGGCCTTTCTTACCCAGAAGCAGAAGGTGGGAGAACTGAAGGATGACGACTTTGAGAA	var1031	4GA24-G-G-T-G-G-G-A-G-A-A23	1	0	10	5	-	30,31,32,33,34,35,36,37,38,39		30	62
CTTGGGGCCTTTCTTACCCAGAAGCAGAAAGGTGGGAGAACTGAAGGATGACGACTTTGAGA	CTTGAGGCCTTTCTTACCCAGAAGCAGAA-GGTGGGAGAACTGAAGGATGACGACTTTGAGA	var285	4GA24A-32	1	1	0	5	30	-	30		62
CTTGGGGCCTTTCTTACCCAGAAGCAGAAGGTGGGAGAACTGAAGGATGACGACTTTGAGAA	CTTGAGGCCTTTCTTACCCAGAAGCAGAAGGTGGGAGAACTGAAGGATGACGACTTTGAGAA	var68	4GA57	1	0	0	5	-	-			62
CTTGTGGCCTTTCTTACCCAGA------AGGTGGGAGAACTGAAGGATGACGACTTTGAGAA	CTTGAGGCCTTTCTTACCCAGAAGCAGAAGGTGGGAGAACTGAAGGATGACGACTTTGAGAA	var1476	4TA17-A-G-C-A-G-A34	1	0	6	5	-	23,24,25,26,27,28		23	62
CTTGTGGCCTTTCTTACCCAGAAGCAG---GTGGGAGAACTGAAGGATGACGACTTTGAGAA	CTTGAGGCCTTTCTTACCCAGAAGCAGAAGGTGGGAGAACTGAAGGATGACGACTTTGAGAA	var570	4TA22-A-A-G32	1	0	3	5	-	28,29,30		28	62
CTTGTGGCCTTTCTTACCCAGAAGCAGA-GGTGGGAGAACTGAAGGATGACGACTTTGAGAA	CTTGAGGCCTTTCTTACCCAGAAGCAGAAGGTGGGAGAACTGAAGGATGACGACTTTGAGAA	var1270	4TA23-A33	1	0	1	5	-	29		29	62
CTTGTGGCCTTTCTTACCCAGAAGCAGAA----------CTGAAGGATGACGACTTTGAGAA	CTTGAGGCCTTTCTTACCCAGAAGCAGAAGGTGGGAGAACTGAAGGATGACGACTTTGAGAA	var1212	4TA24-G-G-T-G-G-G-A-G-A-A23	1	0	10	5	-	30,31,32,33,34,35,36,37,38,39		30	62
CTTGTGGCCTTTCTTACCCAGAAGCAGAAAGGTGGGAGAACTGAAGGATGACGACTTTGAGA	CTTGAGGCCTTTCTTACCCAGAAGCAGAA-GGTGGGAGAACTGAAGGATGACGACTTTGAGA	var578	4TA24A-32	1	1	0	5	30	-	30		62
CTTGTGGCCTTTCTTACCCAGAAGCAGAAGGTGGGAGAACTGAAGGATGACGACTTTGAGAA	CTTGAGGCCTTTCTTACCCAGAAGCAGAAGGTGGGAGAACTGAAGGATGACGACTTTGAGAA	var131	4TA57	1	0	0	5	-	-			62
CTTTAGGCCTTTCTTACCCAGAAGCAGAAGGTGGGAGAACTGAAGGATGACGACTTTGAGAA	CTTGAGGCCTTTCTTACCCAGAAGCAGAAGGTGGGAGAACTGAAGGATGACGACTTTGAGAA	var739	3TG58	1	0	0	4	-	-			62
CTTTCTTACCCAGAAGC---AGGTGGGAGAACTGAA	CTTTCTTACCCAGAAGCAGAAGGTGGGAGAACTGAA	var977	17-A-G-A16	0	0	3	-	-	18,19,20		18	36
CTTTCTTACCCAGAAGCAG-AGGTGGGAGAACTG	CTTTCTTACCCAGAAGCAGAAGGTGGGAGAACTG	var1616	19-A14	0	0	1	-	-	20		20	34
GAAAGATGACGACTTTGAGAA	GAAGGATGACGACTTTGAGAA	var567	3AG17	1	0	0	4	-	-			21
GAACTGAAGGATGACGACTTTGA	GAACTGAAGGATGACGACTTTGA	var1059	23	0	0	36	-	-	1,2,3,4,5,6,7,8,9,10,11,12,13,14,15,16,17,18,19,20,21,22,23,24,25,26,27,28,29,30,31,32,33,34,35,36	-	1	23
GAACTGAAGGATGACGACTTTGAGAA	GAACTGAAGGATGACGACTTTGAGAA	var118	26	0	0	36	-	-	1,2,3,4,5,6,7,8,9,10,11,12,13,14,15,16,17,18,19,20,21,22,23,24,25,26,27,28,29,30,31,32,33,34,35,36	-	1	26
GAACTGAAGGATGACGACTTTGAGAA	GAACTGAAGGATGACGACTTTGAGAA	var147	26	0	0	36	-	-	1,2,3,4,5,6,7,8,9,10,11,12,13,14,15,16,17,18,19,20,21,22,23,24,25,26,27,28,29,30,31,32,33,34,35,36	-	1	26
GAACTGAAGGATGACGACTTTGAGAA	GAACTGAAGGATGACGACTTTGAGAA	var1630	26	0	0	36	-	-	1,2,3,4,5,6,7,8,9,10,11,12,13,14,15,16,17,18,19,20,21,22,23,24,25,26,27,28,29,30,31,32,33,34,35,36	-	1	26
GAACTGAAGGATGACGACTTTGAGAA	GAACTGAAGGATGACGACTTTGAGAA	var169	26	0	0	36	-	-	1,2,3,4,5,6,7,8,9,10,11,12,13,14,15,16,17,18,19,20,21,22,23,24,25,26,27,28,29,30,31,32,33,34,35,36	-	1	26
GAACTGAAGGATGACGACTTTGAGAA	GAACTGAAGGATGACGACTTTGAGAA	var372	26	0	0	36	-	-	1,2,3,4,5,6,7,8,9,10,11,12,13,14,15,16,17,18,19,20,21,22,23,24,25,26,27,28,29,30,31,32,33,34,35,36	-	1	26
GAACTGAAGGATGACGACTTTGAGAA	GAACTGAAGGATGACGACTTTGAGAA	var393	26	0	0	36	-	-	1,2,3,4,5,6,7,8,9,10,11,12,13,14,15,16,17,18,19,20,21,22,23,24,25,26,27,28,29,30,31,32,33,34,35,36	-	1	26
GAACTGAAGGATGACGACTTTGAGAA	GAACTGAAGGATGACGACTTTGAGAA	var423	26	0	0	36	-	-	1,2,3,4,5,6,7,8,9,10,11,12,13,14,15,16,17,18,19,20,21,22,23,24,25,26,27,28,29,30,31,32,33,34,35,36	-	1	26
GAACTGAAGGATGACGACTTTGAGAA	GAACTGAAGGATGACGACTTTGAGAA	var445	26	0	0	36	-	-	1,2,3,4,5,6,7,8,9,10,11,12,13,14,15,16,17,18,19,20,21,22,23,24,25,26,27,28,29,30,31,32,33,34,35,36	-	1	26
GAACTGAAGGATGACGACTTTGAGAA	GAACTGAAGGATGACGACTTTGAGAA	var447	26	0	0	36	-	-	1,2,3,4,5,6,7,8,9,10,11,12,13,14,15,16,17,18,19,20,21,22,23,24,25,26,27,28,29,30,31,32,33,34,35,36	-	1	26
GAACTGAAGGATGACGACTTTGAGAA	GAACTGAAGGATGACGACTTTGAGAA	var510	26	0	0	36	-	-	1,2,3,4,5,6,7,8,9,10,11,12,13,14,15,16,17,18,19,20,21,22,23,24,25,26,27,28,29,30,31,32,33,34,35,36	-	1	26
GAACTGAAGGATGACGACTTTGAGAA	GAACTGAAGGATGACGACTTTGAGAA	var534	26	0	0	36	-	-	1,2,3,4,5,6,7,8,9,10,11,12,13,14,15,16,17,18,19,20,21,22,23,24,25,26,27,28,29,30,31,32,33,34,35,36	-	1	26
GAACTGAAGGATGACGACTTTGAGAA	GAACTGAAGGATGACGACTTTGAGAA	var632	26	0	0	36	-	-	1,2,3,4,5,6,7,8,9,10,11,12,13,14,15,16,17,18,19,20,21,22,23,24,25,26,27,28,29,30,31,32,33,34,35,36	-	1	26
GAACTGAAGGATGACGACTTTGAGAA	GAACTGAAGGATGACGACTTTGAGAA	var862	26	0	0	36	-	-	1,2,3,4,5,6,7,8,9,10,11,12,13,14,15,16,17,18,19,20,21,22,23,24,25,26,27,28,29,30,31,32,33,34,35,36	-	1	26
GAAGAAAGACGACTTTGAGAA	GAAGGATGACGACTTTGAGAA	var931	4AG1AT14	2	0	0	5,7	-	-			21
GAAGAATGACGACTTTGAGAA	GAAGGATGACGACTTTGAGAA	var888	4AG16	1	0	0	5	-	-			21
GAAGACGACTTTGAGAA	GATGACGACTTTGAGAA	var644	2AT14	1	0	0	3	-	-			17
GAAGACTTTGAGAA	GACGACTTTGAGAA	var721	2AC11	1	0	0	3	-	-			14
GAAGCATGACGACTTTGAGAA	GAAGGATGACGACTTTGAGAA	var41	4CG16	1	0	0	5	-	-			21
GAAGCATGACGACTTTGGGA	GAAGGATGACGACTTTGAGA	var1164	4CG12GA2	2	0	0	5,18	-	-			20
GAAGCCTTTCTTACCCAG	GAGGCCTTTCTTACCCAG	var597	2AG15	1	0	0	3	-	-			18
GAAGCCTTTCTTACCCAG---------GTGGGAGAACTGAAGGATGA	GAGGCCTTTCTTACCCAGAAGCAGAAGGTGGGAGAACTGAAGGATGA	var1490	2AG15-A-A-G-C-A-G-A-A-G20	1	0	9	3	-	19,20,21,22,23,24,25,26,27		19	47
GAAGCTTGACGACTTTGAGAA	GAAGGATGACGACTTTGAGAA	var1088	4CGTA15	2	0	0	5,6	-	-			21
GAAGGATGACGAATTTGAGAA	GAAGGATGACGACTTTGAGAA	var1645	12AC8	1	0	0	13	-	-			21
GAAGGATGACGAC-TTGAGAA	GAAGGATGACGACTTTGAGAA	var1480	13-T7	0	0	1	-	-	14		14	21
GAAGGATGACGACTTTGA	GAAGGATGACGACTTTGA	var1263	18	0	0	41	-	-	1,2,3,4,5,6,7,8,9,10,11,12,13,14,15,16,17,18,19,20,21,22,23,24,25,26,27,28,29,30,31,32,33,34,35,36,37,38,39,40,41	-	1	18
GAAGGATGACGACTTTGAGA	GAAGGATGACGACTTTGAGA	var1277	20	0	0	41	-	-	1,2,3,4,5,6,7,8,9,10,11,12,13,14,15,16,17,18,19,20,21,22,23,24,25,26,27,28,29,30,31,32,33,34,35,36,37,38,39,40,41	-	1	20
GAAGGATGACGACTTTGAGAA	GAAGGATGACGACTTTGAGAA	var10	21	0	0	41	-	-	1,2,3,4,5,6,7,8,9,10,11,12,13,14,15,16,17,18,19,20,21,22,23,24,25,26,27,28,29,30,31,32,33,34,35,36,37,38,39,40,41	-	1	21
GAAGGATGACGACTTTGAGAA	GAAGGATGACGACTTTGAGAA	var1084	21	0	0	41	-	-	1,2,3,4,5,6,7,8,9,10,11,12,13,14,15,16,17,18,19,20,21,22,23,24,25,26,27,28,29,30,31,32,33,34,35,36,37,38,39,40,41	-	1	21
GAAGGATGACGACTTTGAGAA	GAAGGATGACGACTTTGAGAA	var1146	21	0	0	41	-	-	1,2,3,4,5,6,7,8,9,10,11,12,13,14,15,16,17,18,19,20,21,22,23,24,25,26,27,28,29,30,31,32,33,34,35,36,37,38,39,40,41	-	1	21
GAAGGATGACGACTTTGAGAA	GAAGGATGACGACTTTGAGAA	var1230	21	0	0	41	-	-	1,2,3,4,5,6,7,8,9,10,11,12,13,14,15,16,17,18,19,20,21,22,23,24,25,26,27,28,29,30,31,32,33,34,35,36,37,38,39,40,41	-	1	21
GAAGGATGACGACTTTGAGAA	GAAGGATGACGACTTTGAGAA	var127	21	0	0	41	-	-	1,2,3,4,5,6,7,8,9,10,11,12,13,14,15,16,17,18,19,20,21,22,23,24,25,26,27,28,29,30,31,32,33,34,35,36,37,38,39,40,41	-	1	21
GAAGGATGACGACTTTGAGAA	GAAGGATGACGACTTTGAGAA	var1278	21	0	0	41	-	-	1,2,3,4,5,6,7,8,9,10,11,12,13,14,15,16,17,18,19,20,21,22,23,24,25,26,27,28,29,30,31,32,33,34,35,36,37,38,39,40,41	-	1	21
GAAGGATGACGACTTTGAGAA	GAAGGATGACGACTTTGAGAA	var1342	21	0	0	41	-	-	1,2,3,4,5,6,7,8,9,10,11,12,13,14,15,16,17,18,19,20,21,22,23,24,25,26,27,28,29,30,31,32,33,34,35,36,37,38,39,40,41	-	1	21
GAAGGATGACGACTTTGAGAA	GAAGGATGACGACTTTGAGAA	var1418	21	0	0	41	-	-	1,2,3,4,5,6,7,8,9,10,11,12,13,14,15,16,17,18,19,20,21,22,23,24,25,26,27,28,29,30,31,32,33,34,35,36,37,38,39,40,41	-	1	21
GAAGGATGACGACTTTGAGAA	GAAGGATGACGACTTTGAGAA	var1479	21	0	0	41	-	-	1,2,3,4,5,6,7,8,9,10,11,12,13,14,15,16,17,18,19,20,21,22,23,24,25,26,27,28,29,30,31,32,33,34,35,36,37,38,39,40,41	-	1	21
GAAGGATGACGACTTTGAGAA	GAAGGATGACGACTTTGAGAA	var1524	21	0	0	41	-	-	1,2,3,4,5,6,7,8,9,10,11,12,13,14,15,16,17,18,19,20,21,22,23,24,25,26,27,28,29,30,31,32,33,34,35,36,37,38,39,40,41	-	1	21
GAAGGATGACGACTTTGAGAA	GAAGGATGACGACTTTGAGAA	var1531	21	0	0	41	-	-	1,2,3,4,5,6,7,8,9,10,11,12,13,14,15,16,17,18,19,20,21,22,23,24,25,26,27,28,29,30,31,32,33,34,35,36,37,38,39,40,41	-	1	21
GAAGGATGACGACTTTGAGAA	GAAGGATGACGACTTTGAGAA	var1605	21	0	0	41	-	-	1,2,3,4,5,6,7,8,9,10,11,12,13,14,15,16,17,18,19,20,21,22,23,24,25,26,27,28,29,30,31,32,33,34,35,36,37,38,39,40,41	-	1	21
GAAGGATGACGACTTTGAGAA	GAAGGATGACGACTTTGAGAA	var175	21	0	0	41	-	-	1,2,3,4,5,6,7,8,9,10,11,12,13,14,15,16,17,18,19,20,21,22,23,24,25,26,27,28,29,30,31,32,33,34,35,36,37,38,39,40,41	-	1	21
GAAGGATGACGACTTTGAGAA	GAAGGATGACGACTTTGAGAA	var216	21	0	0	41	-	-	1,2,3,4,5,6,7,8,9,10,11,12,13,14,15,16,17,18,19,20,21,22,23,24,25,26,27,28,29,30,31,32,33,34,35,36,37,38,39,40,41	-	1	21
GAAGGATGACGACTTTGAGAA	GAAGGATGACGACTTTGAGAA	var500	21	0	0	41	-	-	1,2,3,4,5,6,7,8,9,10,11,12,13,14,15,16,17,18,19,20,21,22,23,24,25,26,27,28,29,30,31,32,33,34,35,36,37,38,39,40,41	-	1	21
GAAGGATGACGACTTTGAGAA	GAAGGATGACGACTTTGAGAA	var654	21	0	0	41	-	-	1,2,3,4,5,6,7,8,9,10,11,12,13,14,15,16,17,18,19,20,21,22,23,24,25,26,27,28,29,30,31,32,33,34,35,36,37,38,39,40,41	-	1	21
GAAGGTGGGAGAACTGAAGGATGACGACTTTGAGAA	GAAGGTGGGAGAACTGAAGGATGACGACTTTGAGAA	var1049	36	0	0	26	-	-	1,2,3,4,5,6,7,8,9,10,11,12,13,14,15,16,17,18,19,20,21,22,23,24,25,26	-	1	36
GAAGGTGGGAGAACTGAAGGATGACGACTTTGAGAA	GAAGGTGGGAGAACTGAAGGATGACGACTTTGAGAA	var1487	36	0	0	26	-	-	1,2,3,4,5,6,7,8,9,10,11,12,13,14,15,16,17,18,19,20,21,22,23,24,25,26	-	1	36
GAAGGTGGGAGAACTGAAGGATGACGACTTTGAGAA	GAAGGTGGGAGAACTGAAGGATGACGACTTTGAGAA	var298	36	0	0	26	-	-	1,2,3,4,5,6,7,8,9,10,11,12,13,14,15,16,17,18,19,20,21,22,23,24,25,26	-	1	36
GACGACTTTGAGAA	GACGACTTTGAGAA	var1235	14	0	0	48	-	-	1,2,3,4,5,6,7,8,9,10,11,12,13,14,15,16,17,18,19,20,21,22,23,24,25,26,27,28,29,30,31,32,33,34,35,36,37,38,39,40,41,42,43,44,45,46,47,48	-	1	14
GACGACTTTGAGAA	GACGACTTTGAGAA	var1284	14	0	0	48	-	-	1,2,3,4,5,6,7,8,9,10,11,12,13,14,15,16,17,18,19,20,21,22,23,24,25,26,27,28,29,30,31,32,33,34,35,36,37,38,39,40,41,42,43,44,45,46,47,48	-	1	14
GACGACTTTGAGAA	GACGACTTTGAGAA	var1655	14	0	0	48	-	-	1,2,3,4,5,6,7,8,9,10,11,12,13,14,15,16,17,18,19,20,21,22,23,24,25,26,27,28,29,30,31,32,33,34,35,36,37,38,39,40,41,42,43,44,45,46,47,48	-	1	14
GACGACTTTGAGAA	GACGACTTTGAGAA	var271	14	0	0	48	-	-	1,2,3,4,5,6,7,8,9,10,11,12,13,14,15,16,17,18,19,20,21,22,23,24,25,26,27,28,29,30,31,32,33,34,35,36,37,38,39,40,41,42,43,44,45,46,47,48	-	1	14
GACGACTTTGAGAA	GACGACTTTGAGAA	var98	14	0	0	48	-	-	1,2,3,4,5,6,7,8,9,10,11,12,13,14,15,16,17,18,19,20,21,22,23,24,25,26,27,28,29,30,31,32,33,34,35,36,37,38,39,40,41,42,43,44,45,46,47,48	-	1	14
GACTTTGAGAA	GACTTTGAGAA	var1534	11	0	0	51	-	-	1,2,3,4,5,6,7,8,9,10,11,12,13,14,15,16,17,18,19,20,21,22,23,24,25,26,27,28,29,30,31,32,33,34,35,36,37,38,39,40,41,42,43,44,45,46,47,48,49,50,51	-	1	11
GACTTTGAGAA	GACTTTGAGAA	var1655	11	0	0	51	-	-	1,2,3,4,5,6,7,8,9,10,11,12,13,14,15,16,17,18,19,20,21,22,23,24,25,26,27,28,29,30,31,32,33,34,35,36,37,38,39,40,41,42,43,44,45,46,47,48,49,50,51	-	1	11
GACTTTGAGAA	GACTTTGAGAA	var347	11	0	0	51	-	-	1,2,3,4,5,6,7,8,9,10,11,12,13,14,15,16,17,18,19,20,21,22,23,24,25,26,27,28,29,30,31,32,33,34,35,36,37,38,39,40,41,42,43,44,45,46,47,48,49,50,51	-	1	11
GACTTTGAGAA	GACTTTGAGAA	var51	11	0	0	51	-	-	1,2,3,4,5,6,7,8,9,10,11,12,13,14,15,16,17,18,19,20,21,22,23,24,25,26,27,28,29,30,31,32,33,34,35,36,37,38,39,40,41,42,43,44,45,46,47,48,49,50,51	-	1	11
GAGAACTGAAGGATGACGACTTTGAGAA	GAGAACTGAAGGATGACGACTTTGAGAA	var1086	28	0	0	34	-	-	1,2,3,4,5,6,7,8,9,10,11,12,13,14,15,16,17,18,19,20,21,22,23,24,25,26,27,28,29,30,31,32,33,34	-	1	28
GAGAACTGAAGGATGACGACTTTGAGAA	GAGAACTGAAGGATGACGACTTTGAGAA	var1488	28	0	0	34	-	-	1,2,3,4,5,6,7,8,9,10,11,12,13,14,15,16,17,18,19,20,21,22,23,24,25,26,27,28,29,30,31,32,33,34	-	1	28
GAGAACTGAAGGATGACGACTTTGAGAA	GAGAACTGAAGGATGACGACTTTGAGAA	var1587	28	0	0	34	-	-	1,2,3,4,5,6,7,8,9,10,11,12,13,14,15,16,17,18,19,20,21,22,23,24,25,26,27,28,29,30,31,32,33,34	-	1	28
GAGAACTGAAGGATGACGACTTTGAGAA	GAGAACTGAAGGATGACGACTTTGAGAA	var222	28	0	0	34	-	-	1,2,3,4,5,6,7,8,9,10,11,12,13,14,15,16,17,18,19,20,21,22,23,24,25,26,27,28,29,30,31,32,33,34	-	1	28
GAGAACTGAAGGATGACGACTTTGAGAA	GAGAACTGAAGGATGACGACTTTGAGAA	var224	28	0	0	34	-	-	1,2,3,4,5,6,7,8,9,10,11,12,13,14,15,16,17,18,19,20,21,22,23,24,25,26,27,28,29,30,31,32,33,34	-	1	28
GAGAACTGAAGGATGACGACTTTGAGAA	GAGAACTGAAGGATGACGACTTTGAGAA	var287	28	0	0	34	-	-	1,2,3,4,5,6,7,8,9,10,11,12,13,14,15,16,17,18,19,20,21,22,23,24,25,26,27,28,29,30,31,32,33,34	-	1	28
GAGAACTGAAGGATGACGACTTTGAGAA	GAGAACTGAAGGATGACGACTTTGAGAA	var289	28	0	0	34	-	-	1,2,3,4,5,6,7,8,9,10,11,12,13,14,15,16,17,18,19,20,21,22,23,24,25,26,27,28,29,30,31,32,33,34	-	1	28
GAGAACTGAAGGATGACGACTTTGAGAA	GAGAACTGAAGGATGACGACTTTGAGAA	var385	28	0	0	34	-	-	1,2,3,4,5,6,7,8,9,10,11,12,13,14,15,16,17,18,19,20,21,22,23,24,25,26,27,28,29,30,31,32,33,34	-	1	28
GAGAACTGAAGGATGACGACTTTGAGAA	GAGAACTGAAGGATGACGACTTTGAGAA	var389	28	0	0	34	-	-	1,2,3,4,5,6,7,8,9,10,11,12,13,14,15,16,17,18,19,20,21,22,23,24,25,26,27,28,29,30,31,32,33,34	-	1	28
GAGAACTGAAGGATGACGACTTTGAGAA	GAGAACTGAAGGATGACGACTTTGAGAA	var446	28	0	0	34	-	-	1,2,3,4,5,6,7,8,9,10,11,12,13,14,15,16,17,18,19,20,21,22,23,24,25,26,27,28,29,30,31,32,33,34	-	1	28
GAGAACTGAAGGATGACGACTTTGAGAA	GAGAACTGAAGGATGACGACTTTGAGAA	var489	28	0	0	34	-	-	1,2,3,4,5,6,7,8,9,10,11,12,13,14,15,16,17,18,19,20,21,22,23,24,25,26,27,28,29,30,31,32,33,34	-	1	28
GAGAACTGAAGGATGACGACTTTGAGAA	GAGAACTGAAGGATGACGACTTTGAGAA	var52	28	0	0	34	-	-	1,2,3,4,5,6,7,8,9,10,11,12,13,14,15,16,17,18,19,20,21,22,23,24,25,26,27,28,29,30,31,32,33,34	-	1	28
GAGAACTGAAGGATGACGACTTTGAGAA	GAGAACTGAAGGATGACGACTTTGAGAA	var871	28	0	0	34	-	-	1,2,3,4,5,6,7,8,9,10,11,12,13,14,15,16,17,18,19,20,21,22,23,24,25,26,27,28,29,30,31,32,33,34	-	1	28
GAGAACTGACGGATGACGACTTTGAGAA	GAGAACTGAAGGATGACGACTTTGAGAA	var1309	9CA18	1	0	0	10	-	-			28
GAGCACTGAAGGATGACGACTTTGAGAA	GAGAACTGAAGGATGACGACTTTGAGAA	var1653	3CA24	1	0	0	4	-	-			28
GAGGACGACTTTGAGAA	GATGACGACTTTGAGAA	var1478	2GT14	1	0	0	3	-	-			17
GAGGACTGAAGGATGACGACTTTGAGAA	GAGAACTGAAGGATGACGACTTTGAGAA	var1184	3GA24	1	0	0	4	-	-			28
GAGGCCTTTCTTACCCAGA	GAGGCCTTTCTTACCCAGA	var1090	19	0	0	3	-	-	1,2,3	-	1	19
GAGGCCTTTCTTACCCAGAAG	GAGGCCTTTCTTACCCAGAAG	var1285	21	0	0	3	-	-	1,2,3	-	1	21
GAGGGATGACGACTTTGAGAA	GAAGGATGACGACTTTGAGAA	var887	2GA18	1	0	0	3	-	-			21
GAGGGTGGGAGAACTGAAGGATGACGACTTTGAGAA	GAAGGTGGGAGAACTGAAGGATGACGACTTTGAGAA	var128	2GA33	1	0	0	3	-	-			36
GATGACGACTTTGAGAA	GATGACGACTTTGAGAA	var1043	17	0	0	45	-	-	1,2,3,4,5,6,7,8,9,10,11,12,13,14,15,16,17,18,19,20,21,22,23,24,25,26,27,28,29,30,31,32,33,34,35,36,37,38,39,40,41,42,43,44,45	-	1	17
GATGACGACTTTGAGAA	GATGACGACTTTGAGAA	var1060	17	0	0	45	-	-	1,2,3,4,5,6,7,8,9,10,11,12,13,14,15,16,17,18,19,20,21,22,23,24,25,26,27,28,29,30,31,32,33,34,35,36,37,38,39,40,41,42,43,44,45	-	1	17
GATGACGACTTTGAGAA	GATGACGACTTTGAGAA	var113	17	0	0	45	-	-	1,2,3,4,5,6,7,8,9,10,11,12,13,14,15,16,17,18,19,20,21,22,23,24,25,26,27,28,29,30,31,32,33,34,35,36,37,38,39,40,41,42,43,44,45	-	1	17
GATGACGACTTTGAGAA	GATGACGACTTTGAGAA	var1161	17	0	0	45	-	-	1,2,3,4,5,6,7,8,9,10,11,12,13,14,15,16,17,18,19,20,21,22,23,24,25,26,27,28,29,30,31,32,33,34,35,36,37,38,39,40,41,42,43,44,45	-	1	17
GATGACGACTTTGAGAA	GATGACGACTTTGAGAA	var1419	17	0	0	45	-	-	1,2,3,4,5,6,7,8,9,10,11,12,13,14,15,16,17,18,19,20,21,22,23,24,25,26,27,28,29,30,31,32,33,34,35,36,37,38,39,40,41,42,43,44,45	-	1	17
GATGACGACTTTGAGAA	GATGACGACTTTGAGAA	var1430	17	0	0	45	-	-	1,2,3,4,5,6,7,8,9,10,11,12,13,14,15,16,17,18,19,20,21,22,23,24,25,26,27,28,29,30,31,32,33,34,35,36,37,38,39,40,41,42,43,44,45	-	1	17
GATGACGACTTTGAGAA	GATGACGACTTTGAGAA	var1526	17	0	0	45	-	-	1,2,3,4,5,6,7,8,9,10,11,12,13,14,15,16,17,18,19,20,21,22,23,24,25,26,27,28,29,30,31,32,33,34,35,36,37,38,39,40,41,42,43,44,45	-	1	17
GATGACGACTTTGAGAA	GATGACGACTTTGAGAA	var229	17	0	0	45	-	-	1,2,3,4,5,6,7,8,9,10,11,12,13,14,15,16,17,18,19,20,21,22,23,24,25,26,27,28,29,30,31,32,33,34,35,36,37,38,39,40,41,42,43,44,45	-	1	17
GATGACGACTTTGAGAA	GATGACGACTTTGAGAA	var36	17	0	0	45	-	-	1,2,3,4,5,6,7,8,9,10,11,12,13,14,15,16,17,18,19,20,21,22,23,24,25,26,27,28,29,30,31,32,33,34,35,36,37,38,39,40,41,42,43,44,45	-	1	17
GATGACGACTTTGAGAA	GATGACGACTTTGAGAA	var362	17	0	0	45	-	-	1,2,3,4,5,6,7,8,9,10,11,12,13,14,15,16,17,18,19,20,21,22,23,24,25,26,27,28,29,30,31,32,33,34,35,36,37,38,39,40,41,42,43,44,45	-	1	17
GCCTCTGGGTAAGA	GCTTCTGGGTAAGA	var954	2CT11	1	0	0	3	-	-			14
GCTTCTGGGTAA	GCTTCTGGGTAA	var1238	12	0	0	24	-	-	1,2,3,4,5,6,7,8,9,10,11,12,13,14,15,16,17,18,19,20,21,22,23,24	-	1	12
GCTTCTGGGTAAG	GCTTCTGGGTAAG	var309	13	0	0	24	-	-	1,2,3,4,5,6,7,8,9,10,11,12,13,14,15,16,17,18,19,20,21,22,23,24	-	1	13
GGACAACTGAAGGATGACGACTTTGAGAA	GGAGAACTGAAGGATGACGACTTTGAGAA	var1669	3CG25	1	0	0	4	-	-			29
GGAGAACTGAAGGATGACGACTTTGAGAA	GGAGAACTGAAGGATGACGACTTTGAGAA	var1122	29	0	0	33	-	-	1,2,3,4,5,6,7,8,9,10,11,12,13,14,15,16,17,18,19,20,21,22,23,24,25,26,27,28,29,30,31,32,33	-	1	29
GGAGAACTGAAGGATGACGACTTTGAGAA	GGAGAACTGAAGGATGACGACTTTGAGAA	var1234	29	0	0	33	-	-	1,2,3,4,5,6,7,8,9,10,11,12,13,14,15,16,17,18,19,20,21,22,23,24,25,26,27,28,29,30,31,32,33	-	1	29
GGAGAACTGAAGGATGACGACTTTGAGAA	GGAGAACTGAAGGATGACGACTTTGAGAA	var1366	29	0	0	33	-	-	1,2,3,4,5,6,7,8,9,10,11,12,13,14,15,16,17,18,19,20,21,22,23,24,25,26,27,28,29,30,31,32,33	-	1	29
GGAGAACTGAAGGATGACGACTTTGAGAA	GGAGAACTGAAGGATGACGACTTTGAGAA	var1550	29	0	0	33	-	-	1,2,3,4,5,6,7,8,9,10,11,12,13,14,15,16,17,18,19,20,21,22,23,24,25,26,27,28,29,30,31,32,33	-	1	29
GGAGAACTGAAGGATGACGACTTTGAGAA	GGAGAACTGAAGGATGACGACTTTGAGAA	var1551	29	0	0	33	-	-	1,2,3,4,5,6,7,8,9,10,11,12,13,14,15,16,17,18,19,20,21,22,23,24,25,26,27,28,29,30,31,32,33	-	1	29
GGAGAACTGAAGGATGACGACTTTGAGAA	GGAGAACTGAAGGATGACGACTTTGAGAA	var1552	29	0	0	33	-	-	1,2,3,4,5,6,7,8,9,10,11,12,13,14,15,16,17,18,19,20,21,22,23,24,25,26,27,28,29,30,31,32,33	-	1	29
GGAGAACTGAAGGATGACGACTTTGAGAA	GGAGAACTGAAGGATGACGACTTTGAGAA	var456	29	0	0	33	-	-	1,2,3,4,5,6,7,8,9,10,11,12,13,14,15,16,17,18,19,20,21,22,23,24,25,26,27,28,29,30,31,32,33	-	1	29
GGAGAACTGAAGGATGACGACTTTGAGAA	GGAGAACTGAAGGATGACGACTTTGAGAA	var523	29	0	0	33	-	-	1,2,3,4,5,6,7,8,9,10,11,12,13,14,15,16,17,18,19,20,21,22,23,24,25,26,27,28,29,30,31,32,33	-	1	29
GGAGAACTGAAGGATGACGACTTTGAGAA	GGAGAACTGAAGGATGACGACTTTGAGAA	var555	29	0	0	33	-	-	1,2,3,4,5,6,7,8,9,10,11,12,13,14,15,16,17,18,19,20,21,22,23,24,25,26,27,28,29,30,31,32,33	-	1	29
GGAGAACTGAAGGATGACGACTTTGAGAA	GGAGAACTGAAGGATGACGACTTTGAGAA	var611	29	0	0	33	-	-	1,2,3,4,5,6,7,8,9,10,11,12,13,14,15,16,17,18,19,20,21,22,23,24,25,26,27,28,29,30,31,32,33	-	1	29
GGAGAACTGAAGGATGACGACTTTGAGAA	GGAGAACTGAAGGATGACGACTTTGAGAA	var99	29	0	0	33	-	-	1,2,3,4,5,6,7,8,9,10,11,12,13,14,15,16,17,18,19,20,21,22,23,24,25,26,27,28,29,30,31,32,33	-	1	29
GGAGAACTGAAGGATGACGACTTTGAGAA	GGAGAACTGAAGGATGACGACTTTGAGAA	var990	29	0	0	33	-	-	1,2,3,4,5,6,7,8,9,10,11,12,13,14,15,16,17,18,19,20,21,22,23,24,25,26,27,28,29,30,31,32,33	-	1	29
GGATGAC---TTTGAGAA	GGATGACGACTTTGAGAA	var917	7-G-A-C8	0	0	3	-	-	8,9,10		8	18
GGATGACGACTTT	GGATGACGACTTT	var1392	13	0	0	44	-	-	1,2,3,4,5,6,7,8,9,10,11,12,13,14,15,16,17,18,19,20,21,22,23,24,25,26,27,28,29,30,31,32,33,34,35,36,37,38,39,40,41,42,43,44	-	1	13
GGATGACGACTTTGA	GGATGACGACTTTGA	var1316	15	0	0	44	-	-	1,2,3,4,5,6,7,8,9,10,11,12,13,14,15,16,17,18,19,20,21,22,23,24,25,26,27,28,29,30,31,32,33,34,35,36,37,38,39,40,41,42,43,44	-	1	15
GGATGACGACTTTGAGAA	GGATGACGACTTTGAGAA	var1038	18	0	0	44	-	-	1,2,3,4,5,6,7,8,9,10,11,12,13,14,15,16,17,18,19,20,21,22,23,24,25,26,27,28,29,30,31,32,33,34,35,36,37,38,39,40,41,42,43,44	-	1	18
GGATGACGACTTTGAGAA	GGATGACGACTTTGAGAA	var1162	18	0	0	44	-	-	1,2,3,4,5,6,7,8,9,10,11,12,13,14,15,16,17,18,19,20,21,22,23,24,25,26,27,28,29,30,31,32,33,34,35,36,37,38,39,40,41,42,43,44	-	1	18
GGATGACGACTTTGAGAA	GGATGACGACTTTGAGAA	var273	18	0	0	44	-	-	1,2,3,4,5,6,7,8,9,10,11,12,13,14,15,16,17,18,19,20,21,22,23,24,25,26,27,28,29,30,31,32,33,34,35,36,37,38,39,40,41,42,43,44	-	1	18
GGATGACGACTTTGAGAA	GGATGACGACTTTGAGAA	var277	18	0	0	44	-	-	1,2,3,4,5,6,7,8,9,10,11,12,13,14,15,16,17,18,19,20,21,22,23,24,25,26,27,28,29,30,31,32,33,34,35,36,37,38,39,40,41,42,43,44	-	1	18
GGATGACGACTTTGAGAA	GGATGACGACTTTGAGAA	var327	18	0	0	44	-	-	1,2,3,4,5,6,7,8,9,10,11,12,13,14,15,16,17,18,19,20,21,22,23,24,25,26,27,28,29,30,31,32,33,34,35,36,37,38,39,40,41,42,43,44	-	1	18
GGATGACGACTTTGAGAA	GGATGACGACTTTGAGAA	var512	18	0	0	44	-	-	1,2,3,4,5,6,7,8,9,10,11,12,13,14,15,16,17,18,19,20,21,22,23,24,25,26,27,28,29,30,31,32,33,34,35,36,37,38,39,40,41,42,43,44	-	1	18
GGATGACGACTTTGAGAA	GGATGACGACTTTGAGAA	var605	18	0	0	44	-	-	1,2,3,4,5,6,7,8,9,10,11,12,13,14,15,16,17,18,19,20,21,22,23,24,25,26,27,28,29,30,31,32,33,34,35,36,37,38,39,40,41,42,43,44	-	1	18
GGATGACGACTTTGAGAA	GGATGACGACTTTGAGAA	var647	18	0	0	44	-	-	1,2,3,4,5,6,7,8,9,10,11,12,13,14,15,16,17,18,19,20,21,22,23,24,25,26,27,28,29,30,31,32,33,34,35,36,37,38,39,40,41,42,43,44	-	1	18
GGATGACGACTTTGAGAA	GGATGACGACTTTGAGAA	var671	18	0	0	44	-	-	1,2,3,4,5,6,7,8,9,10,11,12,13,14,15,16,17,18,19,20,21,22,23,24,25,26,27,28,29,30,31,32,33,34,35,36,37,38,39,40,41,42,43,44	-	1	18
GGATGACGACTTTGAGAA	GGATGACGACTTTGAGAA	var978	18	0	0	44	-	-	1,2,3,4,5,6,7,8,9,10,11,12,13,14,15,16,17,18,19,20,21,22,23,24,25,26,27,28,29,30,31,32,33,34,35,36,37,38,39,40,41,42,43,44	-	1	18
GGCAGAACTGAAGGATGACGACTTTGAGAA	GGGAGAACTGAAGGATGACGACTTTGAGAA	var681	2CG27	1	0	0	3	-	-			30
GGCGAACTGAAGGATGACGACTTTGAGAA	GGAGAACTGAAGGATGACGACTTTGAGAA	var1232	2CA26	1	0	0	3	-	-			29
GGGAGAACTGAAGGATGACGACTTTGAGAA	GGGAGAACTGAAGGATGACGACTTTGAGAA	var1119	30	0	0	32	-	-	1,2,3,4,5,6,7,8,9,10,11,12,13,14,15,16,17,18,19,20,21,22,23,24,25,26,27,28,29,30,31,32	-	1	30
GGGAGAACTGAAGGATGACGACTTTGAGAA	GGGAGAACTGAAGGATGACGACTTTGAGAA	var1311	30	0	0	32	-	-	1,2,3,4,5,6,7,8,9,10,11,12,13,14,15,16,17,18,19,20,21,22,23,24,25,26,27,28,29,30,31,32	-	1	30
GGGAGAACTGAAGGATGACGACTTTGAGAA	GGGAGAACTGAAGGATGACGACTTTGAGAA	var1381	30	0	0	32	-	-	1,2,3,4,5,6,7,8,9,10,11,12,13,14,15,16,17,18,19,20,21,22,23,24,25,26,27,28,29,30,31,32	-	1	30
GGGAGAACTGAAGGATGACGACTTTGAGAA	GGGAGAACTGAAGGATGACGACTTTGAGAA	var497	30	0	0	32	-	-	1,2,3,4,5,6,7,8,9,10,11,12,13,14,15,16,17,18,19,20,21,22,23,24,25,26,27,28,29,30,31,32	-	1	30
GGGAGAACTGAAGGATGACGACTTTGAGAA	GGGAGAACTGAAGGATGACGACTTTGAGAA	var66	30	0	0	32	-	-	1,2,3,4,5,6,7,8,9,10,11,12,13,14,15,16,17,18,19,20,21,22,23,24,25,26,27,28,29,30,31,32	-	1	30
GGTAAGAAAGG	GGTAAGAAAGG	var1191	11	0	0	17	-	-	1,2,3,4,5,6,7,8,9,10,11,12,13,14,15,16,17	-	1	11
GGTAAGAAAGG	GGTAAGAAAGG	var1279	11	0	0	17	-	-	1,2,3,4,5,6,7,8,9,10,11,12,13,14,15,16,17	-	1	11
GGTGGGAGAACTGAAGGATGACGACTTTGAGAA	GGTGGGAGAACTGAAGGATGACGACTTTGAGAA	var1224	33	0	0	29	-	-	1,2,3,4,5,6,7,8,9,10,11,12,13,14,15,16,17,18,19,20,21,22,23,24,25,26,27,28,29	-	1	33
GGTGGGAGAACTGAAGGATGACGACTTTGAGAA	GGTGGGAGAACTGAAGGATGACGACTTTGAGAA	var1532	33	0	0	29	-	-	1,2,3,4,5,6,7,8,9,10,11,12,13,14,15,16,17,18,19,20,21,22,23,24,25,26,27,28,29	-	1	33
GGTGGGAGAACTGAAGGATGACGACTTTGAGAA	GGTGGGAGAACTGAAGGATGACGACTTTGAGAA	var337	33	0	0	29	-	-	1,2,3,4,5,6,7,8,9,10,11,12,13,14,15,16,17,18,19,20,21,22,23,24,25,26,27,28,29	-	1	33
GGTGGGAGAACTGAAGGATGACGACTTTGAGAA	GGTGGGAGAACTGAAGGATGACGACTTTGAGAA	var437	33	0	0	29	-	-	1,2,3,4,5,6,7,8,9,10,11,12,13,14,15,16,17,18,19,20,21,22,23,24,25,26,27,28,29	-	1	33
GGTGGGAGAACTGAAGGATGACGACTTTGAGAA	GGTGGGAGAACTGAAGGATGACGACTTTGAGAA	var541	33	0	0	29	-	-	1,2,3,4,5,6,7,8,9,10,11,12,13,14,15,16,17,18,19,20,21,22,23,24,25,26,27,28,29	-	1	33
GGTGGGAGAACTGAAGGATGACGACTTTGAGAA	GGTGGGAGAACTGAAGGATGACGACTTTGAGAA	var923	33	0	0	29	-	-	1,2,3,4,5,6,7,8,9,10,11,12,13,14,15,16,17,18,19,20,21,22,23,24,25,26,27,28,29	-	1	33
GGTGGGAGAACTGAAGGATGACGACTTTGAGAA	GGTGGGAGAACTGAAGGATGACGACTTTGAGAA	var948	33	0	0	29	-	-	1,2,3,4,5,6,7,8,9,10,11,12,13,14,15,16,17,18,19,20,21,22,23,24,25,26,27,28,29	-	1	33
GTGGGAGAACT	GTGGGAGAACT	var1465	11	0	0	30	-	-	1,2,3,4,5,6,7,8,9,10,11,12,13,14,15,16,17,18,19,20,21,22,23,24,25,26,27,28,29,30	-	1	11
GTGGGAGAACTG	GTGGGAGAACTG	var1265	12	0	0	30	-	-	1,2,3,4,5,6,7,8,9,10,11,12,13,14,15,16,17,18,19,20,21,22,23,24,25,26,27,28,29,30	-	1	12
GTGGGAGAACTGAAG	GTGGGAGAACTGAAG	var1218	15	0	0	30	-	-	1,2,3,4,5,6,7,8,9,10,11,12,13,14,15,16,17,18,19,20,21,22,23,24,25,26,27,28,29,30	-	1	15
GTGGGAGAACTGAAGGA	GTGGGAGAACTGAAGGA	var1289	17	0	0	30	-	-	1,2,3,4,5,6,7,8,9,10,11,12,13,14,15,16,17,18,19,20,21,22,23,24,25,26,27,28,29,30	-	1	17
GTGGGAGAACTGAAGGA	GTGGGAGAACTGAAGGA	var554	17	0	0	30	-	-	1,2,3,4,5,6,7,8,9,10,11,12,13,14,15,16,17,18,19,20,21,22,23,24,25,26,27,28,29,30	-	1	17
GTGGGAGAACTGAAGGAT	GTGGGAGAACTGAAGGAT	var607	18	0	0	30	-	-	1,2,3,4,5,6,7,8,9,10,11,12,13,14,15,16,17,18,19,20,21,22,23,24,25,26,27,28,29,30	-	1	18
GTGGGAGAACTGAAGGATGACGACTTTGAGAA	GTGGGAGAACTGAAGGATGACGACTTTGAGAA	var1177	32	0	0	30	-	-	1,2,3,4,5,6,7,8,9,10,11,12,13,14,15,16,17,18,19,20,21,22,23,24,25,26,27,28,29,30	-	1	32
GTGGGAGAACTGAAGGATGACGACTTTGAGAA	GTGGGAGAACTGAAGGATGACGACTTTGAGAA	var1247	32	0	0	30	-	-	1,2,3,4,5,6,7,8,9,10,11,12,13,14,15,16,17,18,19,20,21,22,23,24,25,26,27,28,29,30	-	1	32
GTGGGAGAACTGAAGGATGACGACTTTGAGAA	GTGGGAGAACTGAAGGATGACGACTTTGAGAA	var1367	32	0	0	30	-	-	1,2,3,4,5,6,7,8,9,10,11,12,13,14,15,16,17,18,19,20,21,22,23,24,25,26,27,28,29,30	-	1	32
GTGGGAGAACTGAAGGATGACGACTTTGAGAA	GTGGGAGAACTGAAGGATGACGACTTTGAGAA	var1390	32	0	0	30	-	-	1,2,3,4,5,6,7,8,9,10,11,12,13,14,15,16,17,18,19,20,21,22,23,24,25,26,27,28,29,30	-	1	32
GTGGGAGAACTGAAGGATGACGACTTTGAGAA	GTGGGAGAACTGAAGGATGACGACTTTGAGAA	var1429	32	0	0	30	-	-	1,2,3,4,5,6,7,8,9,10,11,12,13,14,15,16,17,18,19,20,21,22,23,24,25,26,27,28,29,30	-	1	32
GTGGGAGAACTGAAGGATGACGACTTTGAGAA	GTGGGAGAACTGAAGGATGACGACTTTGAGAA	var349	32	0	0	30	-	-	1,2,3,4,5,6,7,8,9,10,11,12,13,14,15,16,17,18,19,20,21,22,23,24,25,26,27,28,29,30	-	1	32
GTGGGAGAACTGAAGGATGACGACTTTGAGAA	GTGGGAGAACTGAAGGATGACGACTTTGAGAA	var473	32	0	0	30	-	-	1,2,3,4,5,6,7,8,9,10,11,12,13,14,15,16,17,18,19,20,21,22,23,24,25,26,27,28,29,30	-	1	32
GTGGGAGAACTGAAGGATGACGACTTTGAGAA	GTGGGAGAACTGAAGGATGACGACTTTGAGAA	var547	32	0	0	30	-	-	1,2,3,4,5,6,7,8,9,10,11,12,13,14,15,16,17,18,19,20,21,22,23,24,25,26,27,28,29,30	-	1	32
GTGGGAGAACTGAAGGATGACGACTTTGAGAA	GTGGGAGAACTGAAGGATGACGACTTTGAGAA	var720	32	0	0	30	-	-	1,2,3,4,5,6,7,8,9,10,11,12,13,14,15,16,17,18,19,20,21,22,23,24,25,26,27,28,29,30	-	1	32
GTGGGAGAACTGAAGGATGACGACTTTGAGAA	GTGGGAGAACTGAAGGATGACGACTTTGAGAA	var778	32	0	0	30	-	-	1,2,3,4,5,6,7,8,9,10,11,12,13,14,15,16,17,18,19,20,21,22,23,24,25,26,27,28,29,30	-	1	32
TACCCAGAAGCAG---GTGGGAGAACTG	TACCCAGAAGCAGAAGGTGGGAGAACTG	var1456	13-A-A-G12	0	0	3	-	-	14,15,16		14	28
TCCTTCAGTTC	TCCTTCAGTTC	var1059	11	0	0	46	-	-	1,2,3,4,5,6,7,8,9,10,11,12,13,14,15,16,17,18,19,20,21,22,23,24,25,26,27,28,29,30,31,32,33,34,35,36,37,38,39,40,41,42,43,44,45,46	-	1	11
TGAAGGATGACGACTTTGAGAA	TGAAGGATGACGACTTTGAGAA	var1188	22	0	0	40	-	-	1,2,3,4,5,6,7,8,9,10,11,12,13,14,15,16,17,18,19,20,21,22,23,24,25,26,27,28,29,30,31,32,33,34,35,36,37,38,39,40	-	1	22
TGAAGGATGACGACTTTGAGAA	TGAAGGATGACGACTTTGAGAA	var125	22	0	0	40	-	-	1,2,3,4,5,6,7,8,9,10,11,12,13,14,15,16,17,18,19,20,21,22,23,24,25,26,27,28,29,30,31,32,33,34,35,36,37,38,39,40	-	1	22
TGAAGGATGACGACTTTGAGAA	TGAAGGATGACGACTTTGAGAA	var144	22	0	0	40	-	-	1,2,3,4,5,6,7,8,9,10,11,12,13,14,15,16,17,18,19,20,21,22,23,24,25,26,27,28,29,30,31,32,33,34,35,36,37,38,39,40	-	1	22
TGAAGGATGACGACTTTGAGAA	TGAAGGATGACGACTTTGAGAA	var226	22	0	0	40	-	-	1,2,3,4,5,6,7,8,9,10,11,12,13,14,15,16,17,18,19,20,21,22,23,24,25,26,27,28,29,30,31,32,33,34,35,36,37,38,39,40	-	1	22
TGAAGGATGACGACTTTGAGAA	TGAAGGATGACGACTTTGAGAA	var464	22	0	0	40	-	-	1,2,3,4,5,6,7,8,9,10,11,12,13,14,15,16,17,18,19,20,21,22,23,24,25,26,27,28,29,30,31,32,33,34,35,36,37,38,39,40	-	1	22
TGAAGGATGACGACTTTGAGAA	TGAAGGATGACGACTTTGAGAA	var483	22	0	0	40	-	-	1,2,3,4,5,6,7,8,9,10,11,12,13,14,15,16,17,18,19,20,21,22,23,24,25,26,27,28,29,30,31,32,33,34,35,36,37,38,39,40	-	1	22
TGACGACTTTGAGAA	TGACGACTTTGAGAA	var1002	15	0	0	47	-	-	1,2,3,4,5,6,7,8,9,10,11,12,13,14,15,16,17,18,19,20,21,22,23,24,25,26,27,28,29,30,31,32,33,34,35,36,37,38,39,40,41,42,43,44,45,46,47	-	1	15
TGACGACTTTGAGAA	TGACGACTTTGAGAA	var1070	15	0	0	47	-	-	1,2,3,4,5,6,7,8,9,10,11,12,13,14,15,16,17,18,19,20,21,22,23,24,25,26,27,28,29,30,31,32,33,34,35,36,37,38,39,40,41,42,43,44,45,46,47	-	1	15
TGACGACTTTGAGAA	TGACGACTTTGAGAA	var1216	15	0	0	47	-	-	1,2,3,4,5,6,7,8,9,10,11,12,13,14,15,16,17,18,19,20,21,22,23,24,25,26,27,28,29,30,31,32,33,34,35,36,37,38,39,40,41,42,43,44,45,46,47	-	1	15
TGACGACTTTGAGAA	TGACGACTTTGAGAA	var1220	15	0	0	47	-	-	1,2,3,4,5,6,7,8,9,10,11,12,13,14,15,16,17,18,19,20,21,22,23,24,25,26,27,28,29,30,31,32,33,34,35,36,37,38,39,40,41,42,43,44,45,46,47	-	1	15
TGACGACTTTGAGAA	TGACGACTTTGAGAA	var1395	15	0	0	47	-	-	1,2,3,4,5,6,7,8,9,10,11,12,13,14,15,16,17,18,19,20,21,22,23,24,25,26,27,28,29,30,31,32,33,34,35,36,37,38,39,40,41,42,43,44,45,46,47	-	1	15
TGACGACTTTGAGAA	TGACGACTTTGAGAA	var1449	15	0	0	47	-	-	1,2,3,4,5,6,7,8,9,10,11,12,13,14,15,16,17,18,19,20,21,22,23,24,25,26,27,28,29,30,31,32,33,34,35,36,37,38,39,40,41,42,43,44,45,46,47	-	1	15
TGACGACTTTGAGAA	TGACGACTTTGAGAA	var491	15	0	0	47	-	-	1,2,3,4,5,6,7,8,9,10,11,12,13,14,15,16,17,18,19,20,21,22,23,24,25,26,27,28,29,30,31,32,33,34,35,36,37,38,39,40,41,42,43,44,45,46,47	-	1	15
TGACGACTTTGAGAA	TGACGACTTTGAGAA	var815	15	0	0	47	-	-	1,2,3,4,5,6,7,8,9,10,11,12,13,14,15,16,17,18,19,20,21,22,23,24,25,26,27,28,29,30,31,32,33,34,35,36,37,38,39,40,41,42,43,44,45,46,47	-	1	15
TGAGAGAACTGAAGGATGACGACTTTGAGAA	TGGGAGAACTGAAGGATGACGACTTTGAGAA	var560	2AG28	1	0	0	3	-	-			31
TGAGGACTTTGAGAA	TGACGACTTTGAGAA	var987	3GC11	1	0	0	4	-	-			15
TGAGGCCTTTCTTACCCAGA------AGGTGGGAGAACTGAAGGATGACGACTTTGAGAA	TGAGGCCTTTCTTACCCAGAAGCAGAAGGTGGGAGAACTGAAGGATGACGACTTTGAGAA	var1100	20-A-G-C-A-G-A34	0	0	6	-	-	21,22,23,24,25,26		21	60
TGAGGCCTTTCTTACCCAGAAGC----------AGAACTGAAGGATGACGACTTTGAGAA	TGAGGCCTTTCTTACCCAGAAGCAGAAGGTGGGAGAACTGAAGGATGACGACTTTGAGAA	var742	23-A-G-A-A-G-G-T-G-G-G27	0	0	10	-	-	24,25,26,27,28,29,30,31,32,33		24	60
TGAGGCCTTTCTTACCCAGAAGCAG---GTGGGAGAACTGAAGGATGACGACTTTGAGAA	TGAGGCCTTTCTTACCCAGAAGCAGAAGGTGGGAGAACTGAAGGATGACGACTTTGAGAA	var325	25-A-A-G32	0	0	3	-	-	26,27,28		26	60
TGAGGCCTTTCTTACCCAGAAGCAGA--------GAACTGAAGGATGACGACTTTGAGAA	TGAGGCCTTTCTTACCCAGAAGCAGAAGGTGGGAGAACTGAAGGATGACGACTTTGAGAA	var1601	26-A-G-G-T-G-G-G-A26	0	0	8	-	-	27,28,29,30,31,32,33,34		27	60
TGAGGCCTTTCTTACCCAGAAGCAGA-GGTGGGAGAACTGAAGGATGACGACTTTGAGAA	TGAGGCCTTTCTTACCCAGAAGCAGAAGGTGGGAGAACTGAAGGATGACGACTTTGAGAA	var750	26-A33	0	0	1	-	-	27		27	60
TGAGGCCTTTCTTACCCAGAAGCAGAAAGGTGGGAGAACTGAAGGATGACGACTTTGAGA	TGAGGCCTTTCTTACCCAGAAGCAGAA-GGTGGGAGAACTGAAGGATGACGACTTTGAGA	var332	27A-32	0	1	0	-	28	-	28		60
TGAGGCCTTTCTTACCCAGAAGCAGAAGGTGGGAGAACTGAAGGATGACGACTTTGAGAA	TGAGGCCTTTCTTACCCAGAAGCAGAAGGTGGGAGAACTGAAGGATGACGACTTTGAGAA	var650	60	0	0	2	-	-	1,2	-	1	60
TGAGGCCTTTCTTACCCAGAAGCAGAAGGTGGGAGAACTGAAGGATGACGACTTTGAGAA	TGAGGCCTTTCTTACCCAGAAGCAGAAGGTGGGAGAACTGAAGGATGACGACTTTGAGAA	var75	60	0	0	2	-	-	1,2	-	1	60
TGAGGGATGACGACTTTGAGAA	TGAAGGATGACGACTTTGAGAA	var1562	3GA18	1	0	0	4	-	-			22
TGGGAGAACTGAA	TGGGAGAACTGAA	var1543	13	0	0	31	-	-	1,2,3,4,5,6,7,8,9,10,11,12,13,14,15,16,17,18,19,20,21,22,23,24,25,26,27,28,29,30,31	-	1	13
TGGGAGAACTGAAGGATGACGACTTTGAGAA	TGGGAGAACTGAAGGATGACGACTTTGAGAA	var150	31	0	0	31	-	-	1,2,3,4,5,6,7,8,9,10,11,12,13,14,15,16,17,18,19,20,21,22,23,24,25,26,27,28,29,30,31	-	1	31
TGGGAGAACTGAAGGATGACGACTTTGAGAA	TGGGAGAACTGAAGGATGACGACTTTGAGAA	var152	31	0	0	31	-	-	1,2,3,4,5,6,7,8,9,10,11,12,13,14,15,16,17,18,19,20,21,22,23,24,25,26,27,28,29,30,31	-	1	31
TGGGAGAACTGAAGGATGACGACTTTGAGAA	TGGGAGAACTGAAGGATGACGACTTTGAGAA	var207	31	0	0	31	-	-	1,2,3,4,5,6,7,8,9,10,11,12,13,14,15,16,17,18,19,20,21,22,23,24,25,26,27,28,29,30,31	-	1	31
TGGGAGAACTGAAGGATGACGACTTTGAGAA	TGGGAGAACTGAAGGATGACGACTTTGAGAA	var272	31	0	0	31	-	-	1,2,3,4,5,6,7,8,9,10,11,12,13,14,15,16,17,18,19,20,21,22,23,24,25,26,27,28,29,30,31	-	1	31
TGGGAGAACTGAAGGATGACGACTTTGAGAA	TGGGAGAACTGAAGGATGACGACTTTGAGAA	var320	31	0	0	31	-	-	1,2,3,4,5,6,7,8,9,10,11,12,13,14,15,16,17,18,19,20,21,22,23,24,25,26,27,28,29,30,31	-	1	31
TGGGAGAACTGAAGGATGACGACTTTGAGAA	TGGGAGAACTGAAGGATGACGACTTTGAGAA	var341	31	0	0	31	-	-	1,2,3,4,5,6,7,8,9,10,11,12,13,14,15,16,17,18,19,20,21,22,23,24,25,26,27,28,29,30,31	-	1	31
TGGGAGAACTGAAGGATGACGACTTTGAGAA	TGGGAGAACTGAAGGATGACGACTTTGAGAA	var452	31	0	0	31	-	-	1,2,3,4,5,6,7,8,9,10,11,12,13,14,15,16,17,18,19,20,21,22,23,24,25,26,27,28,29,30,31	-	1	31
TGGGTAAGAAAG	TGGGTAAGAAAG	var1423	12	0	0	19	-	-	1,2,3,4,5,6,7,8,9,10,11,12,13,14,15,16,17,18,19	-	1	12
TGGGTAAGAAAGG	TGGGTAAGAAAGG	var1281	13	0	0	19	-	-	1,2,3,4,5,6,7,8,9,10,11,12,13,14,15,16,17,18,19	-	1	13
TGGGTAAGAAAGGCCTCAAG	TGGGTAAGAAAGGCCTCAAG	var1530	20	0	0	19	-	-	1,2,3,4,5,6,7,8,9,10,11,12,13,14,15,16,17,18,19	-	1	20
TTCTGCTTCTGGGTAAG	TTCTGCTTCTGGGTAAG	var587	17	0	0	28	-	-	1,2,3,4,5,6,7,8,9,10,11,12,13,14,15,16,17,18,19,20,21,22,23,24,25,26,27,28	-	1	17
TTCTGCTTCTGGGTAAGAA	TTCTGCTTCTGGGTAAGAA	var1360	19	0	0	28	-	-	1,2,3,4,5,6,7,8,9,10,11,12,13,14,15,16,17,18,19,20,21,22,23,24,25,26,27,28	-	1	19
TTCTGGGTAAG	TTCTGGGTAAG	var1246	11	0	0	22	-	-	1,2,3,4,5,6,7,8,9,10,11,12,13,14,15,16,17,18,19,20,21,22	-	1	11
TTCTTACCCAGA---AGAAGGTGGGAGAA	TTCTTACCCAGAAGCAGAAGGTGGGAGAA	var850	12-A-G-C14	0	0	3	-	-	13,14,15		13	29
TTCTTACCCAGAAGCAGAACTGAAGGTGGGAGAACTG	TTCTTACCCAGAAGCA-----GAAGGTGGGAGAACTG	var522	16G-A-A-C-T-16	0	5	0	-	17,18,19,20,21	-	17		37
TTGAGGCCTTTCTTACCCAGA------AGGTGGGAGAACTGAAGGATGACGACTTTGAGAA	TTGAGGCCTTTCTTACCCAGAAGCAGAAGGTGGGAGAACTGAAGGATGACGACTTTGAGAA	var1642	21-A-G-C-A-G-A34	0	0	6	-	-	22,23,24,25,26,27		22	61
TTGAGGCCTTTCTTACCCAGAAGC----------AGAACTGAAGGATGACGACTTTGAGAA	TTGAGGCCTTTCTTACCCAGAAGCAGAAGGTGGGAGAACTGAAGGATGACGACTTTGAGAA	var1383	24-A-G-A-A-G-G-T-G-G-G27	0	0	10	-	-	25,26,27,28,29,30,31,32,33,34		25	61
TTGAGGCCTTTCTTACCCAGAAGCAG---GTGGGAGAACTGAAGGATGACGACTTTGAGAA	TTGAGGCCTTTCTTACCCAGAAGCAGAAGGTGGGAGAACTGAAGGATGACGACTTTGAGAA	var695	26-A-A-G32	0	0	3	-	-	27,28,29		27	61
TTGAGGCCTTTCTTACCCAGAAGCAGA-GGTGGGAGAACTGAAGGATGACGACTTTGAGAA	TTGAGGCCTTTCTTACCCAGAAGCAGAAGGTGGGAGAACTGAAGGATGACGACTTTGAGAA	var1519	27-A33	0	0	1	-	-	28		28	61
TTGAGGCCTTTCTTACCCAGAAGCAGAAAGGTGGGAGAACTGAAGGATGACGACTTTGAGA	TTGAGGCCTTTCTTACCCAGAAGCAGAA-GGTGGGAGAACTGAAGGATGACGACTTTGAGA	var975	28A-32	0	1	0	-	29	-	29		61
TTGAGGCCTTTCTTACCCAGAAGCAGAAGGTGGGAGAACTGAAGGATGACGACTTTGAGAA	TTGAGGCCTTTCTTACCCAGAAGCAGAAGGTGGGAGAACTGAAGGATGACGACTTTGAGAA	var174	61	0	0	1	-	-	1	-	1	61
TTGAGGCCTTTCTTACCCAGAAGCAGAAGGTGGGAGAACTGAAGGATGACGACTTTGAGAA	TTGAGGCCTTTCTTACCCAGAAGCAGAAGGTGGGAGAACTGAAGGATGACGACTTTGAGAA	var353	61	0	0	1	-	-	1	-	1	61
TTGAGGCCTTTCTTACCCAGAAGCAGAAGGTGGGAGAACTGAAGGATGACGACTTTGAGAA	TTGAGGCCTTTCTTACCCAGAAGCAGAAGGTGGGAGAACTGAAGGATGACGACTTTGAGAA	var746	61	0	0	1	-	-	1	-	1	61
TTTCTTACCCAGAAACTGAAGG	TTTCTTACCCAGAAGCAGAAGG	var597	14AG1TA5	2	0	0	15,17	-	-			22
