# Supplementary material for: Creation of Novel Protein Variants with CRISPR/Cas9-Mediated Mutagenesis: Turning a Screening By-Product into a Discovery Tool
Source: PLoS One. 2017 Jan 24;12(1):e0170445. doi: 10.1371/journal.pone.0170445 (PMC5261743; doi:10.1371/journal.pone.0170445)
Supplement: S5 Table — (XLSX) [file pone.0170445.s007.xlsx]

## Sheet: BRAFsequencing
		MelJuSo	MelJuSo	MelJuSo	MelJuSo	MelJuSo	MelJuSo		MelJuSo	MelJuSo	MelJuSo	MelJuSo	MelJuSo	MelJuSo		MelJuSo	MelJuSo		MelJuSo
		Rep A	Rep B	Rep C	Rep A	Rep B	Rep C		Rep A	Rep B	Rep C	Rep A	Rep B	Rep C		Rep ABC	Rep ABC		Rep ABC
		Selumetinib	Selumetinib	Selumetinib	No Drug	No Drug	No Drug		Selumetinib	Selumetinib	Selumetinib	No Drug	No Drug	No Drug		Selumetinib	No Drug		Selumetinib
Sequence	Translated Sequence	SUM	SUM	SUM	SUM	SUM	SUM		RPM	RPM	RPM	RPM	RPM	RPM		AVG RPM	AVG RPM		Fold Enrichment	Note
TGTGGCAGTGAAAATGTTGAATGTGACAGCACCTACACCTCAGTTACAAGCCTTCAAAAATGAAGTAGGAGTACTCAGGTGAGCTTGTGTGAATTACTCTTTTCCAGAGAAAGAAGTTATTTTTATTAGCT	VAVKMLNVTAPTPQLQAFKNEVGVLR*ACVNYSFPEKEVIFIS	67695	77172	78219	16709	14567	36259		651697	644356	659180	163544	128473	327017		651745	206345		3.15852	del_494_Q
TGTGGCAGTGAAAATGTTGAATGTGACAGCACCTACACCTCCAGTTACAAGCCTTCAAAAATGAAGTAGGAGTACTCAGGTGAGCTTGTGTGAATTACTCTTTTCCAGAGAAAGAAGTTATTTTTATTAGC	VAVKMLNVTAPTPPVTSLQK*SRSTQVSLCELLFSRERSYFY*	1800	2272	2199	2971	2459	6774		17328.5	18970.3	18531.8	29079.6	21687	61094.2		18276.9	37286.9		0.490169
TGTGGCAGTGAAAATGTTGAATGTGACAGCACCTACACAGTTACAAGCCTTCAAAAATGAAGTAGGAGTACTCAGGTGAGCTTGTGTGAATTACTCTTTTCCAGAGAAAGAAGTTATTTTTATTAGCTCCT	VAVKMLNVTAPTQLQAFKNEVGVLR*ACVNYSFPEKEVIFISS	1801	2356	1743	575	562	1391		17338.1	19671.7	14688.9	5627.99	4956.52	12545.3		17232.9	7709.94		2.23515	del_492_PQ
TGTGGCAGTGAAAATGTTGAATGTGACAGCACCTACACCTCAGCAGTTACAAGCCTTCAAAAATGAAGTAGGAGTACTCAGGTGAGCTTGTGTGAATTACTCTTTTCCAGAGAAAGAAGTTATTTTTATTA	VAVKMLNVTAPTPQQLQAFKNEVGVLR*ACVNYSFPEKEVIFI	1379	1760	1430	50182	64482	11108		13275.6	14695.3	12051.1	491171	568695	100182		13340.7	386683		0.0345003	wild-type
TGTGGCAGTGAAAATGTTGAATGTGACAGCACCTACACCTCAAGCCTTCAAAAATGAAGTAGGAGTACTCAGGTGAGCTTGTGTGAATTACTCTTTTCCAGAGAAAGAAGTTATTTTTATTAGCTCCTGGT	VAVKMLNVTAPTPQAFKNEVGVLR*ACVNYSFPEKEVIFISSW	1091	751	958	579	494	1027		10503	6270.56	8073.42	5667.14	4356.8	9262.43		8282.33	6428.79		1.28832
TGTGGCAGTGAAAATGTTGAATGTGACAGCACCTACACCTCAGCCTTCAAAAATGAAGTAGGAGTACTCAGGTGAGCTTGTGTGAATTACTCTTTTCCAGAGAAAGAAGTTATTTTTATTAGCTCCTGGTT	VAVKMLNVTAPTPQPSKMK*EYSGELV*ITLFQRKKLFLLAPG	771	905	1062	929	908	2107		7422.38	7556.4	8949.87	9092.87	8008.04	19002.9		7976.22	12034.6		0.662774
TGTGGCAGTGAAAATGTTGAATGTGACAGCACCTACAAGCCTTCAAAAATGAAGTAGGAGTACTCAGGTGAGCTTGTGTGAATTACTCTTTTCCAGAGAAAGAAGTTATTTTTATTAGCTCCTGGTTCCCA	VAVKMLNVTAPTSLQK*SRSTQVSLCELLFSRERSYFY*LLVP	741	1088	886	1046	945	2165		7133.57	9084.38	7466.65	10238	8334.36	19526		7894.87	12699.5		0.62167
TGTGGCAGTGAAAATGTTGAATGTGACAGCACCTACACCTTCAAAAATGAAGTAGGAGTACTCAGGTGAGCTTGTGTGAATTACTCTTTTCCAGAGAAAGAAGTTATTTTTATTAGCTCCTGGTTCCCAGT	VAVKMLNVTAPTPSKMK*EYSGELV*ITLFQRKKLFLLAPGSQ	568	1080	613	782	638	1358		5468.11	9017.58	5165.98	7654.06	5626.8	12247.7		6550.56	8509.52		0.769792
TGTGGCAGTGAAAATGTTGAATGTGACAGCACCTACACCTCAGCACAGTTACAAGCCTTCAAAAATGAAGTAGGAGTACTCAGGTGAGCTTGTGTGAATTACTCTTTTCCAGAGAAAGAAGTTATTTTTAT	VAVKMLNVTAPTPQHSYKPSKMK*EYSGELV*ITLFQRKKLFL	576	623	637	781	702	1603		5545.13	5201.81	5368.23	7644.27	6191.24	14457.3		5371.72	9430.95		0.569585
TGTGGCAGTGAAAATGTTGAATGTGACAGCACCTACACCTCAAAAATGAAGTAGGAGTACTCAGGTGAGCTTGTGTGAATTACTCTTTTCCAGAGAAAGAAGTTATTTTTATTAGCTCCTGGTTCCCAGTG	VAVKMLNVTAPTPQK*SRSTQVSLCELLFSRERSYFY*LLVPS	655	492	599	631	566	1384		6305.66	4108.01	5047.99	6176.1	4991.8	12482.2		5153.89	7883.36		0.653768
TGTGGCAGTGAAAATGTTGAATGTGACAGCACCTACACCTCAGCCAGTTACAAGCCTTCAAAAATGAAGTAGGAGTACTCAGGTGAGCTTGTGTGAATTACTCTTTTCCAGAGAAAGAAGTTATTTTTATT	VAVKMLNVTAPTPQPVTSLQK*SRSTQVSLCELLFSRERSYFY	524	547	468	789	665	1556		5044.52	4567.24	3944.01	7722.57	5864.92	14033.4		4518.59	9206.98		0.490779
TGTGGCAGTGAAAATGTTGAATGTGACAGCACCTACACCTCACAGTTACAAGCCTTCAAAAATGAAGTAGGAGTACTCAGGTGAGCTTGTGTGAATTACTCTTTTCCAGAGAAAGAAGTTATTTTTATTAG	VAVKMLNVTAPTPHSYKPSKMK*EYSGELV*ITLFQRKKLFLL	506	509	507	661	595	1564		4871.24	4249.95	4272.68	6469.74	5247.56	14105.6		4464.62	8607.63		0.518682
TGTGGCAGTGAAAATGTTGAATGTGACAGCACCTACACCCCAGTTACAAGCCTTCAAAAATGAAGTAGGAGTACTCAGGTGAGCTTGTGTGAATTACTCTTTTCCAGAGAAAGAAGTTATTTTTATTAGCT	VAVKMLNVTAPTPQLQAFKNEVGVLR*ACVNYSFPEKEVIFIS	472	465	504	145	137	429		4543.92	3882.57	4247.39	1419.23	1208.26	3869.12		4224.63	2165.54		1.95085
TGTGGCAGTGAAAATGTTGAATGTGACAGCACCTACACCTCAGGTTACAAGCCTTCAAAAATGAAGTAGGAGTACTCAGGTGAGCTTGTGTGAATTACTCTTTTCCAGAGAAAGAAGTTATTTTTATTAGC	VAVKMLNVTAPTPQVTSLQK*SRSTQVSLCELLFSRERSYFY*	326	553	379	491	419	1242		3138.39	4617.34	3193.97	4805.81	3695.34	11201.5		3649.9	6567.55		0.555747
TGTGGCAGTGAAAATGTTGAATGTGACAGCACCTACACCTCAGTTACAAGCCTTCAAAAATGGAGTAGGAGTACTCAGGTGAGCTTGTGTGAATTACTCTTTTCCAGAGAAAGAAGTTATTTTTATTAGCT	VAVKMLNVTAPTPQLQAFKNGVGVLR*ACVNYSFPEKEVIFIS	374	406	435	84	82	198		3600.48	3389.94	3665.91	822.175	723.193	1785.75		3552.11	1110.37		3.19903
TGTGGCAGTGAAAATGTTGAATGTGACAGCACCTACACCTCAGTTACAAGCCTTCAAAAATGAGGTAGGAGTACTCAGGTGAGCTTGTGTGAATTACTCTTTTCCAGAGAAAGAAGTTATTTTTATTAGCT	VAVKMLNVTAPTPQLQAFKNEVGVLR*ACVNYSFPEKEVIFIS	351	397	442	77	83	197		3379.06	3314.8	3724.9	753.661	732.013	1776.73		3472.92	1087.47		3.19359
TGTGGCAGTGAAAATGTTGAATGTGACAGCACCTACACCTCAGTTACAAGCCTTCAAAAGTGAAGTAGGAGTACTCAGGTGAGCTTGTGTGAATTACTCTTTTCCAGAGAAAGAAGTTATTTTTATTAGCT	VAVKMLNVTAPTPQLQAFKSEVGVLR*ACVNYSFPEKEVIFIS	348	369	470	86	81	195		3350.18	3081.01	3960.86	841.751	714.374	1758.69		3464.02	1104.94		3.13503
TGTGGCAGTGAAAATGTTGAATGTGACAGCACCTACACCTCAGTTACAAGCCTTCAAAGATGAAGTAGGAGTACTCAGGTGAGCTTGTGTGAATTACTCTTTTCCAGAGAAAGAAGTTATTTTTATTAGCT	VAVKMLNVTAPTPQLQAFKDEVGVLR*ACVNYSFPEKEVIFIS	336	400	403	85	88	205		3234.66	3339.85	3396.23	831.963	776.11	1848.88		3323.58	1152.32		2.88426
TGTGGCAGTGAAAATGTTGAATGTGACAGCACCTACACCTCAGTTACAAGCCTTCAAAAATGAAATAGGAGTACTCAGGTGAGCTTGTGTGAATTACTCTTTTCCAGAGAAAGAAGTTATTTTTATTAGCT	VAVKMLNVTAPTPQLQAFKNEIGVLR*ACVNYSFPEKEVIFIS	311	405	415	66	71	173		2993.98	3381.59	3497.36	645.995	626.18	1560.27		3290.98	944.149		3.48565
TGTGGCAGTGAAAATGTTGAATGTGACAGCACCTACAGTTACAAGCCTTCAAAAATGAAGTAGGAGTACTCAGGTGAGCTTGTGTGAATTACTCTTTTCCAGAGAAAGAAGTTATTTTTATTAGCTCCTGG	VAVKMLNVTAPTVTSLQK*SRSTQVSLCELLFSRERSYFY*LL	282	352	471	517	482	1333		2714.8	2939.06	3969.29	5060.29	4250.97	12022.2		3207.72	7111.16		0.451082
TGTGGCAGTGAAAATGTTGAATGTGACAGCACCTACACCTCAGTTACAAGCCTTCAAAAATAAAGTAGGAGTACTCAGGTGAGCTTGTGTGAATTACTCTTTTCCAGAGAAAGAAGTTATTTTTATTAGCT	VAVKMLNVTAPTPQLQAFKNKVGVLR*ACVNYSFPEKEVIFIS	306	375	380	78	66	177		2945.85	3131.11	3202.4	763.448	582.082	1596.35		3093.12	980.627		3.15423
TGTGGCAGTGAAAATGTTGAATGTGACAGCACCTACACCTCAGTTACAAGCCTTCAAGAATGAAGTAGGAGTACTCAGGTGAGCTTGTGTGAATTACTCTTTTCCAGAGAAAGAAGTTATTTTTATTAGCT	VAVKMLNVTAPTPQLQAFKNEVGVLR*ACVNYSFPEKEVIFIS	281	342	375	80	67	190		2705.17	2855.57	3160.26	783.024	590.902	1713.6		2907	1029.17		2.8246
TGTGGCAGTGAAAATGTTGAATGTGACAGCACCTACACCTCAGCAAGTTACAAGCCTTCAAAAATGAAGTAGGAGTACTCAGGTGAGCTTGTGTGAATTACTCTTTTCCAGAGAAAGAAGTTATTTTTATT	VAVKMLNVTAPTPQQVTSLQK*SRSTQVSLCELLFSRERSYFY	279	327	368	389	269	771		2685.92	2730.32	3101.27	3807.45	2372.43	6953.59		2839.17	4377.82		0.648535
TGTGGCAGTGAAAATGTTGAATGTGACAGCACCTACACCTCAGAGTTACAAGCCTTCAAAAATGAAGTAGGAGTACTCAGGTGAGCTTGTGTGAATTACTCTTTTCCAGAGAAAGAAGTTATTTTTATTAG	VAVKMLNVTAPTPQSYKPSKMK*EYSGELV*ITLFQRKKLFLL	243	305	407	520	456	1138		2339.35	2546.63	3429.94	5089.66	4021.66	10263.5		2771.97	6458.28		0.429212
TGTGGCAGTGAAAATGTTGAATGTGACAGCACCTACACCAGTTACAAGCCTTCAAAAATGAAGTAGGAGTACTCAGGTGAGCTTGTGTGAATTACTCTTTTCCAGAGAAAGAAGTTATTTTTATTAGCTCC	VAVKMLNVTAPTPVTSLQK*SRSTQVSLCELLFSRERSYFY*L	343	270	307	450	432	1076		3302.05	2254.4	2587.2	4404.51	3809.99	9704.36		2714.55	5972.95		0.454473
TGTGGCAGTGAAAATGTTGAATGTGACAGCACCTACACCTCAGCTACAAGCCTTCAAAAATGAAGTAGGAGTACTCAGGTGAGCTTGTGTGAATTACTCTTTTCCAGAGAAAGAAGTTATTTTTATTAGCT	VAVKMLNVTAPTPQLQAFKNEVGVLR*ACVNYSFPEKEVIFIS	326	210	187	44	30	97		3138.39	1753.42	1575.92	430.663	264.583	874.835		2155.91	523.361		4.11936
TGTGGCAGTGAAAATGTTGAATGTGACAGTTACAAGCCTTCAAAAATGAAGTAGGAGTACTCAGGTGAGCTTGTGTGAATTACTCTTTTCCAGAGAAAGAAGTTATTTTTATTAGCTCCTGGTTCCCAGTG	VAVKMLNVTVTSLQK*SRSTQVSLCELLFSRERSYFY*LLVPS	260	237	188	297	306	560		2503.01	1978.86	1584.35	2906.98	2698.75	5050.6		2022.07	3552.11		0.56926
TGTGGCAGTGAAAATGTTGAATGTGACAGCACCTACACAAGCCTTCAAAAATGAAGTAGGAGTACTCAGGTGAGCTTGTGTGAATTACTCTTTTCCAGAGAAAGAAGTTATTTTTATTAGCTCCTGGTTCC	VAVKMLNVTAPTQAFKNEVGVLR*ACVNYSFPEKEVIFISSWF	177	296	200	114	173	276		1703.97	2471.49	1685.47	1115.81	1525.76	2489.22		1953.64	1710.26		1.14231
TGTGGCAGTGAAAATGTTGAATGTGACAGCACCTACACCTACAAGCCTTCAAAAATGAAGTAGGAGTACTCAGGTGAGCTTGTGTGAATTACTCTTTTCCAGAGAAAGAAGTTATTTTTATTAGCTCCTGG	VAVKMLNVTAPTPTSLQK*SRSTQVSLCELLFSRERSYFY*LL	206	184	244	285	280	555		1983.15	1536.33	2056.28	2789.52	2469.44	5005.5		1858.59	3421.49		0.54321
TGTGGCAGTGAAAATGTTGAATGTGACAGCACCTACACCCAGTTACAAGCCTTCAAAAATGAAGTAGGAGTACTCAGGTGAGCTTGTGTGAATTACTCTTTTCCAGAGAAAGAAGTTATTTTTATTAGCTC	VAVKMLNVTAPTPSYKPSKMK*EYSGELV*ITLFQRKKLFLLA	226	209	194	306	271	612		2175.69	1745.07	1634.91	2995.07	2390.07	5519.58		1851.89	3634.9		0.509474
TGTGGCAGTGAAAATGTTGAATGTGACAGCACCTACCAGTTACAAGCCTTCAAAAATGAAGTAGGAGTACTCAGGTGAGCTTGTGTGAATTACTCTTTTCCAGAGAAAGAAGTTATTTTTATTAGCTCCTG	VAVKMLNVTAPTSYKPSKMK*EYSGELV*ITLFQRKKLFLLAP	161	184	275	315	244	630		1549.94	1536.33	2317.53	3083.16	2151.94	5681.92		1801.27	3639.01		0.494988
TGTGGCAGTGAAAATGTTGAATGTGACAGCACAGTTACAAGCCTTCAAAAATGAAGTAGGAGTACTCAGGTGAGCTTGTGTGAATTACTCTTTTCCAGAGAAAGAAGTTATTTTTATTAGCTCCTGGTTCC	VAVKMLNVTAQLQAFKNEVGVLR*ACVNYSFPEKEVIFISSWF	154	209	249	73	77	141		1482.55	1745.07	2098.41	714.509	679.096	1271.67		1775.35	888.425		1.99831
TGTGGCAGTGAAAATGTTGAATGTGACAGCACCTACACCTCAGCAAGCCTTCAAAAATGAAGTAGGAGTACTCAGGTGAGCTTGTGTGAATTACTCTTTTCCAGAGAAAGAAGTTATTTTTATTAGCTCCT	VAVKMLNVTAPTPQQAFKNEVGVLR*ACVNYSFPEKEVIFISS	129	161	282	134	109	340		1241.88	1344.29	2376.52	1311.57	961.318	3066.43		1654.23	1779.77		0.92946
TGTGGCAGTGAAAATGTTACAAGCCTTCAAAAATGAAGTAGGAGTACTCAGGTGAGCTTGTGTGAATTACTCTTTTCCAGAGAAAGAAGTTATTTTTATTAGCTCCTGGTTCCCAGTGGACAGTGCAGGGG	VAVKMLQAFKNEVGVLR*ACVNYSFPEKEVIFISSWFPVDSAG	114	286	126	165	141	298		1097.47	2387.99	1061.85	1614.99	1243.54	2687.64		1515.77	1848.72		0.819902
TGTGGCAGTGAAAATGTTGAATGTGACAAGCCTTCAAAAATGAAGTAGGAGTACTCAGGTGAGCTTGTGTGAATTACTCTTTTCCAGAGAAAGAAGTTATTTTTATTAGCTCCTGGTTCCCAGTGGACAGT	VAVKMLNVTSLQK*SRSTQVSLCELLFSRERSYFY*LLVPSGQ	187	147	167	152	162	312		1800.24	1227.39	1407.37	1487.75	1428.75	2813.9		1478.33	1910.13		0.773944
TGTGGCAGTGAAAATGTTGAATGTGACAGCACCTACACCTCAACAGTTACAAGCCTTCAAAAATGAAGTAGGAGTACTCAGGTGAGCTTGTGTGAATTACTCTTTTCCAGAGAAAGAAGTTATTTTTATTA	VAVKMLNVTAPTPQQLQAFKNEVGVLR*ACVNYSFPEKEVIFI	144	209	111	111	112	257		1386.28	1745.07	935.438	1086.45	987.776	2317.86		1355.6	1464.03		0.925936
TGTGGCAGTGAAAATGTTGAATGTTACAAGCCTTCAAAAATGAAGTAGGAGTACTCAGGTGAGCTTGTGTGAATTACTCTTTTCCAGAGAAAGAAGTTATTTTTATTAGCTCCTGGTTCCCAGTGGACAGT	VAVKMLNVTSLQK*SRSTQVSLCELLFSRERSYFY*LLVPSGQ	164	146	148	256	216	555		1578.82	1219.04	1247.25	2505.68	1905	5005.5		1348.37	3138.73		0.429592
TGTGGCAGTGAAAATGTTGAATGTGACAGCCTTCAAAAATGAAGTAGGAGTACTCAGGTGAGCTTGTGTGAATTACTCTTTTCCAGAGAAAGAAGTTATTTTTATTAGCTCCTGGTTCCCAGTGGACAGTG	VAVKMLNVTAFKNEVGVLR*ACVNYSFPEKEVIFISSWFPVDS	170	156	129	121	116	250		1636.58	1302.54	1087.13	1184.32	1023.05	2254.73		1342.08	1487.37		0.902321
TGTGGCAGTGAAAATGTTGAATGTGACAGCACCTACACCTCAGTCAGTTACAAGCCTTCAAAAATGAAGTAGGAGTACTCAGGTGAGCTTGTGTGAATTACTCTTTTCCAGAGAAAGAAGTTATTTTTATT	VAVKMLNVTAPTPQSVTSLQK*SRSTQVSLCELLFSRERSYFY	138	140	180	282	350	671		1328.52	1168.95	1516.93	2760.16	3086.8	6051.7		1338.13	3966.22		0.337382
TGTGGCAGTGAAAATGTTGAATGTGACAGCACCTACACCTCAGTACAAGCCTTCAAAAATGAAGTAGGAGTACTCAGGTGAGCTTGTGTGAATTACTCTTTTCCAGAGAAAGAAGTTATTTTTATTAGCTC	VAVKMLNVTAPTPQYKPSKMK*EYSGELV*ITLFQRKKLFLLA	103	189	154	212	206	487		991.576	1578.08	1297.81	2075.01	1816.8	4392.21		1289.16	2761.34		0.466858
TGTGGCAGTGAAAATGTTGAATGTGACAGCACCTACACCTCAGTTACAAGCCTTCAAAATGAAGTAGGAGTACTCAGGTGAGCTTGTGTGAATTACTCTTTTCCAGAGAAAGAAGTTATTTTTATTAGCTC	VAVKMLNVTAPTPQLQAFKMK*EYSGELV*ITLFQRKKLFLLA	122	108	196	154	104	360		1174.49	901.758	1651.76	1507.32	917.221	3246.81		1242.67	1890.45		0.657341
TGTGGCAGTGAAAATGTTGAATGTGACAGCACCTACACTTCAAAAATGAAGTAGGAGTACTCAGGTGAGCTTGTGTGAATTACTCTTTTCCAGAGAAAGAAGTTATTTTTATTAGCTCCTGGTTCCCAGTG	VAVKMLNVTAPTLQK*SRSTQVSLCELLFSRERSYFY*LLVPS	237	98	23	56	46	124		2281.59	818.262	193.829	548.117	405.694	1118.35		1097.89	690.719		1.58949
TGTGGCAGTGAAAATGTTGAATGTGACAGCACCTACACCTCAGGTGTTACAAGCCTTCAAAAATGAAGTAGGAGTACTCAGGTGAGCTTGTGTGAATTACTCTTTTCCAGAGAAAGAAGTTATTTTTATTA	VAVKMLNVTAPTPQVLQAFKNEVGVLR*ACVNYSFPEKEVIFI	72	184	109	61	41	91		693.141	1536.33	918.583	597.056	361.597	820.722		1049.35	593.125		1.76919
TGTGGCAGTGAAAATGTTGAATGTGACAGCACCTACACCACAGTTACAAGCCTTCAAAAATGAAGTAGGAGTACTCAGGTGAGCTTGTGTGAATTACTCTTTTCCAGAGAAAGAAGTTATTTTTATTAGCT	VAVKMLNVTAPTPQLQAFKNEVGVLR*ACVNYSFPEKEVIFIS	58	101	205	28	17	73		558.363	843.311	1727.61	274.058	149.93	658.381		1043.1	360.79		2.89114
TGTGGCAGTGAAAATGTTGAATGTGACAGCACCTACACCTCAGCAACAAGCCTTCAAAAATGAAGTAGGAGTACTCAGGTGAGCTTGTGTGAATTACTCTTTTCCAGAGAAAGAAGTTATTTTTATTAGCT	VAVKMLNVTAPTPQQQAFKNEVGVLR*ACVNYSFPEKEVIFIS	145	118	86	36	20	32		1395.91	985.255	724.754	352.361	176.389	288.605		1035.31	272.452		3.79996
TGTGGCAGTGAAAATGTTGAATGTGACAGCAGTTACAAGCCTTCAAAAATGAAGTAGGAGTACTCAGGTGAGCTTGTGTGAATTACTCTTTTCCAGAGAAAGAAGTTATTTTTATTAGCTCCTGGTTCCCA	VAVKMLNVTAVTSLQK*SRSTQVSLCELLFSRERSYFY*LLVP	131	88	130	123	137	274		1261.13	734.766	1095.56	1203.9	1208.26	2471.18		1030.49	1627.78		0.633061
TGTGGCAGTGAAAATGTTGAATGTGACAGCACCTACACCTCAGACAAGCCTTCAAAAATGAAGTAGGAGTACTCAGGTGAGCTTGTGTGAATTACTCTTTTCCAGAGAAAGAAGTTATTTTTATTAGCTCC	VAVKMLNVTAPTPQTSLQK*SRSTQVSLCELLFSRERSYFY*L	123	130	93	123	128	265		1184.12	1085.45	783.745	1203.9	1128.89	2390.01		1017.77	1574.27		0.646504
TGTGGCAGTGAAAATGTTGAATGTGACAGCACCTACACCTCAGTTACAAGCCTTCAAAAATGAAGTAGGGGTACTCAGGTGAGCTTGTGTGAATTACTCTTTTCCAGAGAAAGAAGTTATTTTTATTAGCT	VAVKMLNVTAPTPQLQAFKNEVGVLR*ACVNYSFPEKEVIFIS	88	80	180	20	9	44		847.172	667.969	1516.93	195.756	79.3749	396.833		1010.69	223.988		4.51225
TGTGGCAGTGAAAATGTTGAATGTGACAGCACCTACACCTCAGCAGCAGTTACAAGCCTTCAAAAATGAAGTAGGAGTACTCAGGTGAGCTTGTGTGAATTACTCTTTTCCAGAGAAAGAAGTTATTTTTA	VAVKMLNVTAPTPQQQLQAFKNEVGVLR*ACVNYSFPEKEVIF	91	106	148	53	41	113		876.053	885.059	1247.25	518.753	361.597	1019.14		1002.79	633.163		1.58378
TGTGGCAGTGAAAATGTTGAATGTGACAGCACCTACACCTCAGTTACAAGCCTTCAAAAATGAAGTAGGAGTACTCAGGTGAGCTTGTGTGAATTACTCCTTTCCAGAGAAAGAAGTTATTTTTATTAGCT	VAVKMLNVTAPTPQLQAFKNEVGVLR*ACVNYSFPEKEVIFIS	99	114	120	12	20	52		953.069	951.856	1011.28	117.454	176.389	468.984		972.07	254.275		3.8229
TGTGGCAGTGAAAATGTTGAATGTGACAGCACCTTCAAAAATGAAGTAGGAGTACTCAGGTGAGCTTGTGTGAATTACTCTTTTCCAGAGAAAGAAGTTATTTTTATTAGCTCCTGGTTCCCAGTGGACAG	VAVKMLNVTAPSKMK*EYSGELV*ITLFQRKKLFLLAPGSQWT	84	110	120	115	119	230		808.664	918.458	1011.28	1125.6	1049.51	2074.35		912.802	1416.49		0.644413
TGTGGCAGTGAAAATGTTGAATGTGACAGCACCTACACCTTACAAGCCTTCAAAAATGAAGTAGGAGTACTCAGGTGAGCTTGTGTGAATTACTCTTTTCCAGAGAAAGAAGTTATTTTTATTAGCTCCTG	VAVKMLNVTAPTPYKPSKMK*EYSGELV*ITLFQRKKLFLLAP	123	71	101	113	111	300		1184.12	592.823	851.164	1106.02	978.957	2705.68		876.034	1596.88		0.548589
TGTGGCAGTGAAAATGTTGAATGTGACAGCACCTACACCTCAGGCAGTTACAAGCCTTCAAAAATGAAGTAGGAGTACTCAGGTGAGCTTGTGTGAATTACTCTTTTCCAGAGAAAGAAGTTATTTTTATT	VAVKMLNVTAPTPQAVTSLQK*SRSTQVSLCELLFSRERSYFY	93	81	121	184	159	397		895.307	676.319	1019.71	1800.96	1402.29	3580.51		863.779	2261.25		0.381991
TGTGGCAGTGAAAATGTTGAATGTGACAGCACCTACACCTCAGGTGAGCTTGTGTGAATTACTCTTTTCCAGAGAAAGAAGTTATTTTTATTAGCTCCTGGTTCCCAGTGGACAGTGCAGGGGAAAGAATA	VAVKMLNVTAPTPQVSLCELLFSRERSYFY*LLVPSGQCRGKN	137	51	93	150	87	210		1318.89	425.83	783.745	1468.17	767.29	1893.97		842.823	1376.48		0.612304
TGTGGCAGTGAAAATGTTGAATGTGACAGCACCTACACCGCAGTTACAAGCCTTCAAAAATGAAGTAGGAGTACTCAGGTGAGCTTGTGTGAATTACTCTTTTCCAGAGAAAGAAGTTATTTTTATTAGCT	VAVKMLNVTAPTPQLQAFKNEVGVLR*ACVNYSFPEKEVIFIS	132	40	102	21	14	44		1270.76	333.985	859.592	205.544	123.472	396.833		821.445	241.949		3.39511
TGTGGCAGTGAAAATGTTGAATGTGACAGCACCTACACCTCAGCCTTCAAAATGAAGTAGGAGTACTCAGGTGAGCTTGTGTGAATTACTCTTTTCCAGAGAAAGAAGTTATTTTTATTAGCTCCTGGTTC	VAVKMLNVTAPTPQPSK*SRSTQVSLCELLFSRERSYFY*LLV	99	81	98	103	76	212		953.069	676.319	825.882	1008.14	670.277	1912.01		818.423	1196.81		0.683837
TGTGGCAGTGAAAATGTTGAATGTGACAGCACCTACACCTCAAAATGAAGTAGGAGTACTCAGGTGAGCTTGTGTGAATTACTCTTTTCCAGAGAAAGAAGTTATTTTTATTAGCTCCTGGTTCCCAGTGG	VAVKMLNVTAPTPQNEVGVLR*ACVNYSFPEKEVIFISSWFPV	35	174	72	82	49	119		336.943	1452.83	606.771	802.6	432.152	1073.25		798.849	769.334		1.03836
TGTGGCAGTGAAAATGTTGAATGTGACACAGTTACAAGCCTTCAAAAATGAAGTAGGAGTACTCAGGTGAGCTTGTGTGAATTACTCTTTTCCAGAGAAAGAAGTTATTTTTATTAGCTCCTGGTTCCCAG	VAVKMLNVTQLQAFKNEVGVLR*ACVNYSFPEKEVIFISSWFP	116	119	21	2	5	6		1116.73	993.604	176.975	19.5756	44.0972	54.1135		762.435	39.2621		19.4191
TGTGGCAGTGAAAATGTTGAATGTGGCAGCACCTACACCTCAGTTACAAGCCTTCAAAAATGAAGTAGGAGTACTCAGGTGAGCTTGTGTGAATTACTCTTTTCCAGAGAAAGAAGTTATTTTTATTAGCT	VAVKMLNVAAPTPQLQAFKNEVGVLR*ACVNYSFPEKEVIFIS	80	94	86	19	16	42		770.156	784.864	724.754	185.968	141.111	378.795		759.925	235.291		3.22972
TGTGGCAGTGAAAATGTTGAATGTGACAGCACCTACACCTCAGACAGTTACAAGCCTTCAAAAATGAAGTAGGAGTACTCAGGTGAGCTTGTGTGAATTACTCTTTTCCAGAGAAAGAAGTTATTTTTATT	VAVKMLNVTAPTPQTVTSLQK*SRSTQVSLCELLFSRERSYFY	66	113	66	122	132	210		635.379	943.507	556.206	1194.11	1164.16	1893.97		711.697	1417.42		0.502109
TGTGGCAGTGAAAATGTTGAATGTGACAGCACCTACACCTCAGTTACAAGCCTTCAAAAATGAAGTAGGAGTACTCAGGTGAGCTTGTGTGAATTACTCTTTTCCAGAGAAGGAAGTTATTTTTATTAGCT	VAVKMLNVTAPTPQLQAFKNEVGVLR*ACVNYSFPEKEVIFIS	76	87	76	24	19	31		731.649	726.417	640.48	234.907	167.569	279.587		699.515	227.354		3.07676
TGTGGCAGTGAAAATGTTGAATGTGACAGCACCTACACCTCAGGTACAAGCCTTCAAAAATGAAGTAGGAGTACTCAGGTGAGCTTGTGTGAATTACTCTTTTCCAGAGAAAGAAGTTATTTTTATTAGCT	VAVKMLNVTAPTPQVQAFKNEVGVLR*ACVNYSFPEKEVIFIS	71	93	74	13	17	16		683.514	776.514	623.625	127.241	149.93	144.303		694.551	140.491		4.94372
TGTGGCAGTGAAAATGTTGAATGTGACAGCACCTACACCTCAGTTACAAGCCTTCAAAAATGAAGTAGGAGTACTCAGGTGAGCTTGTGTGAATTACTCTTTTCCAGAGAAAGAAGTTATTTTTATTAGCC	VAVKMLNVTAPTPQLQAFKNEVGVLR*ACVNYSFPEKEVIFIS	91	82	62	11	21	32		876.053	684.668	522.497	107.666	185.208	288.605		694.406	193.826		3.58262
TGTGGCAGTGAAAATGTTGAATGTGACAGCACCTACACCTCAGTTACAAGCCTTCAAAAATGAAGTAGGAGTACTCAGGTGAGCTTGTGTGAATTACTCTTTTCCAGAGAAAGAAGTTATTTTATTAGCTC	VAVKMLNVTAPTPQLQAFKNEVGVLR*ACVNYSFPEKEVILLA	58	128	52	14	18	39		558.363	1068.75	438.223	137.029	158.75	351.738		688.446	215.839		3.18963
TGTGGCAGTGAAAATGTTGAATGTGACAGCACCTACACCTCAGTTACAAGCCTTCAAAAATGAAGTAGGAGTACTCAGGCGAGCTTGTGTGAATTACTCTTTTCCAGAGAAAGAAGTTATTTTTATTAGCT	VAVKMLNVTAPTPQLQAFKNEVGVLRRACVNYSFPEKEVIFIS	65	81	90	24	21	31		625.752	676.319	758.463	234.907	185.208	279.587		686.845	233.234		2.94487
TGCGGCAGTGAAAATGTTGAATGTGACAGCACCTACACCTCAGTTACAAGCCTTCAAAAATGAAGTAGGAGTACTCAGGTGAGCTTGTGTGAATTACTCTTTTCCAGAGAAAGAAGTTATTTTTATTAGCT	AAVKMLNVTAPTPQLQAFKNEVGVLR*ACVNYSFPEKEVIFIS	59	97	77	18	13	41		567.99	809.913	648.907	176.18	114.653	369.776		675.603	220.203		3.06809
TGTGGCAGTGAAAATGTTGAATGTGACAGCACCTACACCTCAGTTACAAGCCTTCAAAAATGAAGTAGGAGTACTCAGGTGAGCTTGTGCGAATTACTCTTTTCCAGAGAAAGAAGTTATTTTTATTAGCT	VAVKMLNVTAPTPQLQAFKNEVGVLR*ACANYSFPEKEVIFIS	68	76	84	11	9	36		654.633	634.571	707.899	107.666	79.3749	324.681		665.701	170.574		3.90271
TGTGGCAGTGAAAATGTTGAATGCGACAGCACCTACACCTCAGTTACAAGCCTTCAAAAATGAAGTAGGAGTACTCAGGTGAGCTTGTGTGAATTACTCTTTTCCAGAGAAAGAAGTTATTTTTATTAGCT	VAVKMLNATAPTPQLQAFKNEVGVLR*ACVNYSFPEKEVIFIS	67	75	85	17	15	34		645.006	626.221	716.326	166.393	132.291	306.643		662.518	201.776		3.28344
TGTGGCAGTGAAAATGTTGAATGTGACAGCACCTACACCTCAGAAGCCTTCAAAAATGAAGTAGGAGTACTCAGGTGAGCTTGTGTGAATTACTCTTTTCCAGAGAAAGAAGTTATTTTTATTAGCTCCTG	VAVKMLNVTAPTPQKPSKMK*EYSGELV*ITLFQRKKLFLLAP	78	96	46	75	91	216		750.903	801.563	387.659	734.085	802.568	1948.09		646.708	1161.58		0.556749
TGTGGCAGTGAAAATGTTGAATGTGACAGCACCTACACCTCAGTTACAAGCCTTCAAAAATGAAGTAGGAGTACTCAGGTGAGCTTGCGTGAATTACTCTTTTCCAGAGAAAGAAGTTATTTTTATTAGCT	VAVKMLNVTAPTPQLQAFKNEVGVLR*ACVNYSFPEKEVIFIS	71	64	81	21	14	34		683.514	534.375	682.617	205.544	123.472	306.643		633.502	211.886		2.98982
TGTGGCAGTGAAAATGTTGAATGTGACAGCACCTACACCTCAGCATTACAAGCCTTCAAAAATGAAGTAGGAGTACTCAGGTGAGCTTGTGTGAATTACTCTTTTCCAGAGAAAGAAGTTATTTTTATTAG	VAVKMLNVTAPTPQHYKPSKMK*EYSGELV*ITLFQRKKLFLL	57	75	83	117	86	245		548.736	626.221	699.472	1145.17	758.471	2209.64		624.81	1371.09		0.455702
TGTGGCAGTGAAAATGTTGAATGTGACAGCACCTACACCTCAGTTACAAGCCCTCAAAAATGAAGTAGGAGTACTCAGGTGAGCTTGTGTGAATTACTCTTTTCCAGAGAAAGAAGTTATTTTTATTAGCT	VAVKMLNVTAPTPQLQALKNEVGVLR*ACVNYSFPEKEVIFIS	59	77	77	17	12	31		567.99	642.92	648.907	166.393	105.833	279.587		619.939	183.937		3.37038
TGTGGCAGTTACAAGCCTTCAAAAATGAAGTAGGAGTACTCAGGTGAGCTTGTGTGAATTACTCTTTTCCAGAGAAAGAAGTTATTTTTATTAGCTCCTGGTTCCCAGTGGACAGTGCAGGGGAAAGAATA	VAVTSLQK*SRSTQVSLCELLFSRERSYFY*LLVPSGQCRGKN	45	107	62	101	89	204		433.213	893.409	522.497	988.568	784.929	1839.86		616.373	1204.45		0.511745
TGTGGCAGTGAAAATGTTGAATGTGACAGCACCTACACCTCAGTTACAAGCCTTCAAAAATGAAGTAGGAGTACTCAGGTGAGCCTGTGTGAATTACTCTTTTCCAGAGAAAGAAGTTATTTTTATTAGCT	VAVKMLNVTAPTPQLQAFKNEVGVLR*ACVNYSFPEKEVIFIS	83	63	61	10	9	21		799.037	526.026	514.069	97.878	79.3749	189.397		613.044	122.217		5.01604
TGTGGCAGTGAAAATGTTGAATGTGACGGCACCTACACCTCAGTTACAAGCCTTCAAAAATGAAGTAGGAGTACTCAGGTGAGCTTGTGTGAATTACTCTTTTCCAGAGAAAGAAGTTATTTTTATTAGCT	VAVKMLNVTAPTPQLQAFKNEVGVLR*ACVNYSFPEKEVIFIS	64	74	71	17	22	30		616.125	617.872	598.343	166.393	194.027	270.568		610.78	210.329		2.90392
TGTGGCAGTGAAAATGTTGAATGTGACAGCACCTACACCTCACAAGCCTTCAAAAATGAAGTAGGAGTACTCAGGTGAGCTTGTGTGAATTACTCTTTTCCAGAGAAAGAAGTTATTTTTATTAGCTCCTG	VAVKMLNVTAPTPHKPSKMK*EYSGELV*ITLFQRKKLFLLAP	132	30	33	61	55	162		1270.76	250.488	278.103	597.056	485.069	1461.07		599.783	847.73		0.707517
TGTGGCAGTGAAAATGTTGAATGTGACAGCACCTACACCTCAGTTACAAGCCTTCAAAAATGAAGTAGGAGTACTCAGGTGGGCTTGTGTGAATTACTCTTTTCCAGAGAAAGAAGTTATTTTTATTAGCT	VAVKMLNVTAPTPQLQAFKNEVGVLRWACVNYSFPEKEVIFIS	58	77	68	22	13	34		558.363	642.92	573.061	215.332	114.653	306.643		591.448	212.209		2.7871
TGTGGCAGTGAAAATGTTGAATGTGACAGCACCAGTTACAAGCCTTCAAAAATGAAGTAGGAGTACTCAGGTGAGCTTGTGTGAATTACTCTTTTCCAGAGAAAGAAGTTATTTTTATTAGCTCCTGGTTC	VAVKMLNVTAPVTSLQK*SRSTQVSLCELLFSRERSYFY*LLV	121	34	37	92	75	222		1164.86	283.887	311.813	900.478	661.457	2002.2		586.854	1188.05		0.493966
TGTGGCAGTGAAAATGTTGAATGTGACAGCACCTACACCTCAGTTACAAGCCTTCAAAAATGAAGTAGGAGTACTCAGGTGAGCTTGTGTGAATTACCCTTTTCCAGAGAAAGAAGTTATTTTTATTAGCT	VAVKMLNVTAPTPQLQAFKNEVGVLR*ACVNYPFPEKEVIFIS	57	81	63	16	8	40		548.736	676.319	530.924	156.605	70.5554	360.757		585.327	195.972		2.98678
TGTGGCAGTGAAAATGTTGAATGTGACAGCACCTACACCTCAGCAGGTACAAGCCTTCAAAAATGAAGTAGGAGTACTCAGGTGAGCTTGTGTGAATTACTCTTTTCCAGAGAAAGAAGTTATTTTTATTA	VAVKMLNVTAPTPQQVQAFKNEVGVLR*ACVNYSFPEKEVIFI	70	76	53	22	24	25		673.887	634.571	446.651	215.332	211.666	225.473		585.036	217.49		2.68994
TGTGGCAGTGAAAATGTTGAATGTGACAGCACCTACACCTCAGTAGGAGTACTCAGGTGAGCTTGTGTGAATTACTCTTTTCCAGAGAAAGAAGTTATTTTTATTAGCTCCTGGTTCCCAGTGGACAGTGC	VAVKMLNVTAPTPQ*EYSGELV*ITLFQRKKLFLLAPGSQWTV	93	74	28	54	45	115		895.307	617.872	235.966	528.541	396.874	1037.18		583.048	654.197		0.891242
TGTGGCAGTGAAAATGTTGAATGTGACAGCACCTACACCTCAGTTACAAGCCTTCAAAAATGAAGTAGGAGTACTCAGGTGAGCTTGTGTGAATTACTCTTCTCCAGAGAAAGAAGTTATTTTTATTAGCT	VAVKMLNVTAPTPQLQAFKNEVGVLR*ACVNYSSPEKEVIFIS	71	62	62	12	11	37		683.514	517.676	522.497	117.454	97.0137	333.7		574.562	182.722		3.14445
TGTGGCAGTGAGAATGTTGAATGTGACAGCACCTACACCTCAGTTACAAGCCTTCAAAAATGAAGTAGGAGTACTCAGGTGAGCTTGTGTGAATTACTCTTTTCCAGAGAAAGAAGTTATTTTTATTAGCT	VAVRMLNVTAPTPQLQAFKNEVGVLR*ACVNYSFPEKEVIFIS	53	71	70	12	16	22		510.229	592.823	589.916	117.454	141.111	198.416		564.322	152.327		3.70468
TGTGGCAGTGAAAATGTTGAATGTGACAGCACCTACACCTCGGTTACAAGCCTTCAAAAATGAAGTAGGAGTACTCAGGTGAGCTTGTGTGAATTACTCTTTTCCAGAGAAAGAAGTTATTTTTATTAGCT	VAVKMLNVTAPTPRLQAFKNEVGVLR*ACVNYSFPEKEVIFIS	48	41	105	13	8	17		462.094	342.334	884.874	127.241	70.5554	153.322		563.101	117.04		4.8112
TGTGGCAGTGAAAATGTTGAATCAGTTACAAGCCTTCAAAAATGAAGTAGGAGTACTCAGGTGAGCTTGTGTGAATTACTCTTTTCCAGAGAAAGAAGTTATTTTTATTAGCTCCTGGTTCCCAGTGGACA	VAVKMLNQLQAFKNEVGVLR*ACVNYSFPEKEVIFISSWFPVD	19	167	10	7	3	3		182.912	1394.39	84.2737	68.5146	26.4583	27.0568		553.857	40.6766		13.6161
TGTGGCAGTGAAGATGTTGAATGTGACAGCACCTACACCTCAGTTACAAGCCTTCAAAAATGAAGTAGGAGTACTCAGGTGAGCTTGTGTGAATTACTCTTTTCCAGAGAAAGAAGTTATTTTTATTAGCT	VAVKMLNVTAPTPQLQAFKNEVGVLR*ACVNYSFPEKEVIFIS	61	61	67	20	12	30		587.244	509.327	564.634	195.756	105.833	270.568		553.735	190.719		2.90341
TGTGGCAGTGAAAATGTTGAATGTGACAGCACAAGCCTTCAAAAATGAAGTAGGAGTACTCAGGTGAGCTTGTGTGAATTACTCTTTTCCAGAGAAAGAAGTTATTTTTATTAGCTCCTGGTTCCCAGTGG	VAVKMLNVTAQAFKNEVGVLR*ACVNYSFPEKEVIFISSWFPV	69	70	44	47	75	60		664.26	584.473	370.804	460.027	661.457	541.135		539.846	554.206		0.974088
TGTGGCAGTGAAAATGTTGAATGTGACAGCACCTACACCTCAGTTACAAGCCTTCAAAAATGAAGTAGGAGTACTCAGGTGAGCTTGTGTGAATTACTCTTTTCCAGGGAAAGAAGTTATTTTTATTAGCT	VAVKMLNVTAPTPQLQAFKNEVGVLR*ACVNYSFPGKEVIFIS	57	78	49	12	16	21		548.736	651.27	412.941	117.454	141.111	189.397		537.649	149.321		3.60064
TGTGGCAGTGAAAATGTTGAATGTGACAGCACCTACACCTCAGTTACAAGCCTTCAAAAATGAAGTGGGAGTACTCAGGTGAGCTTGTGTGAATTACTCTTTTCCAGAGAAAGAAGTTATTTTTATTAGCT	VAVKMLNVTAPTPQLQAFKNEVGVLR*ACVNYSFPEKEVIFIS	46	66	73	13	5	28		442.84	551.075	615.198	127.241	44.0972	252.53		536.371	141.289		3.79626
TGTGGCAGTGAAAATGTTGAATGTGACAGCACCCACACCTCAGTTACAAGCCTTCAAAAATGAAGTAGGAGTACTCAGGTGAGCTTGTGTGAATTACTCTTTTCCAGAGAAAGAAGTTATTTTTATTAGCT	VAVKMLNVTAPTPQLQAFKNEVGVLR*ACVNYSFPEKEVIFIS	70	57	53	16	8	23		673.887	475.928	446.651	156.605	70.5554	207.435		532.155	144.865		3.67345
TGTGGCAGTGAAAATGTTGAATGTGGCAGTTACAAGCCTTCAAAAATGAAGTAGGAGTACTCAGGTGAGCTTGTGTGAATTACTCTTTTCCAGAGAAAGAAGTTATTTTTATTAGCTCCTGGTTCCCAGTG	VAVKMLNVAVTSLQK*SRSTQVSLCELLFSRERSYFY*LLVPS	1	188	1	1	4	3		9.62696	1569.73	8.42737	9.7878	35.2777	27.0568		529.261	24.0408		22.0151
TGTGGCAGTGAAAATGTTGAATGTGACAGCACCTACACCTCTTTTCCAGAGAAAGAAGTTATTTTTATTAGCTCCTGGTTCCCAGTGGACAGTGCAGGGGAAAGAATAGTAGAAGATCGGAAGAGCACACG	VAVKMLNVTAPTPLFQRKKLFLLAPGSQWTVQGKE**KIGRAH	88	51	36	86	57	136		847.172	425.83	303.385	841.751	502.708	1226.57		525.463	857.011		0.613134
TGTGGCAGTGAAAATGTTGAATGTGACAGCACCTACACCTCAGTTACAAGCCTTCAAAAATGAAGCAGGAGTACTCAGGTGAGCTTGTGTGAATTACTCTTTTCCAGAGAAAGAAGTTATTTTTATTAGCT	VAVKMLNVTAPTPQLQAFKNEAGVLR*ACVNYSFPEKEVIFIS	53	63	63	16	15	30		510.229	526.026	530.924	156.605	132.291	270.568		522.393	186.488		2.80121
TGTGGCAGTGAAAATGTTGAATGTGACAGCACCTACACCTCAGTTACAAGCCTTCAAAAATGAAGTAGGAGTACTCAGGTGAGCTTGTGTGGATTACTCTTTTCCAGAGAAAGAAGTTATTTTTATTAGCT	VAVKMLNVTAPTPQLQAFKNEVGVLR*ACVDYSFPEKEVIFIS	50	71	56	16	8	43		481.348	592.823	471.933	156.605	70.5554	387.814		515.368	204.991		2.5141
TGTGGCAGCGAAAATGTTGAATGTGACAGCACCTACACCTCAGTTACAAGCCTTCAAAAATGAAGTAGGAGTACTCAGGTGAGCTTGTGTGAATTACTCTTTTCCAGAGAAAGAAGTTATTTTTATTAGCT	VAAKMLNVTAPTPQLQAFKNEVGVLR*ACVNYSFPEKEVIFIS	61	55	56	10	9	33		587.244	459.229	471.933	97.878	79.3749	297.624		506.135	158.292		3.19747
TGTGGCAGTGAAAATGTTGAATGTGACAGCACCTACACCTCAGTTACAAGCCTTCAAAAATGAAGTAGGAGTACCCAGGTGAGCTTGTGTGAATTACTCTTTTCCAGAGAAAGAAGTTATTTTTATTAGCT	VAVKMLNVTAPTPQLQAFKNEVGVPR*ACVNYSFPEKEVIFIS	56	61	54	17	7	25		539.11	509.327	455.078	166.393	61.736	225.473		501.171	151.201		3.31461
CGTGGCAGTGAAAATGTTGAATGTGACAGCACCTACACCTCAGTTACAAGCCTTCAAAAATGAAGTAGGAGTACTCAGGTGAGCTTGTGTGAATTACTCTTTTCCAGAGAAAGAAGTTATTTTTATTAGCT	VAVKMLNVTAPTPQLQAFKNEVGVLR*ACVNYSFPEKEVIFIS	47	71	54	7	11	26		452.467	592.823	455.078	68.5146	97.0137	234.492		500.122	133.34		3.75073
TGTGGCAGTGAAAATGTTGAATGTGACAGCACCTACGCCTCAGTTACAAGCCTTCAAAAATGAAGTAGGAGTACTCAGGTGAGCTTGTGTGAATTACTCTTTTCCAGAGAAAGAAGTTATTTTTATTAGCT	VAVKMLNVTAPTPQLQAFKNEVGVLR*ACVNYSFPEKEVIFIS	48	65	57	12	6	22		462.094	542.725	480.36	117.454	52.9166	198.416		495.06	122.929		4.02721
TGTGGCAGTGAAAATGTTGAATGTGACAGCACCTACACCTCAGTTACAGGCCTTCAAAAATGAAGTAGGAGTACTCAGGTGAGCTTGTGTGAATTACTCTTTTCCAGAGAAAGAAGTTATTTTTATTAGCT	VAVKMLNVTAPTPQLQAFKNEVGVLR*ACVNYSFPEKEVIFIS	54	67	48	17	6	24		519.856	559.424	404.514	166.393	52.9166	216.454		494.598	145.254		3.40504
TGTGGCAGTGAAAATGTTGAATGTGACAGCACCTACACCTCAGTTACAAGCCTTCAAAAATGAAGTAGGAGTACTCGGGTGAGCTTGTGTGAATTACTCTTTTCCAGAGAAAGAAGTTATTTTTATTAGCT	VAVKMLNVTAPTPQLQAFKNEVGVLG*ACVNYSFPEKEVIFIS	50	49	70	15	3	28		481.348	409.131	589.916	146.817	26.4583	252.53		493.465	141.935		3.4767
TGTGGCAGTGAAAATGTTGAATGTGACAGCACCTACACCTCAGAAATGAAGTAGGAGTACTCAGGTGAGCTTGTGTGAATTACTCTTTTCCAGAGAAAGAAGTTATTTTTATTAGCTCCTGGTTCCCAGTG	VAVKMLNVTAPTPQK*SRSTQVSLCELLFSRERSYFY*LLVPS	49	41	79	53	29	65		471.721	342.334	665.762	518.753	255.763	586.23		493.272	453.582		1.0875
TGTGGCAGTGAAAATGTTGAATGTGACAGCGCCTACACCTCAGTTACAAGCCTTCAAAAATGAAGTAGGAGTACTCAGGTGAGCTTGTGTGAATTACTCTTTTCCAGAGAAAGAAGTTATTTTTATTAGCT	VAVKMLNVTAPTPQLQAFKNEVGVLR*ACVNYSFPEKEVIFIS	47	60	62	10	12	29		452.467	500.977	522.497	97.878	105.833	261.549		491.98	155.087		3.17229
TGTGGCAGTGAAAATGTTGAATGTGACAGCACCTACACCTCAAAAGCCTTCAAAAATGAAGTAGGAGTACTCAGGTGAGCTTGTGTGAATTACTCTTTTCCAGAGAAAGAAGTTATTTTTATTAGCTCCTG	VAVKMLNVTAPTPQKPSKMK*EYSGELV*ITLFQRKKLFLLAP	25	33	113	15	38	57		240.674	275.537	952.293	146.817	335.138	514.079		489.501	332.011		1.47435
TGTGGCAGTGAAAATGTTGAGTGTGACAGCACCTACACCTCAGTTACAAGCCTTCAAAAATGAAGTAGGAGTACTCAGGTGAGCTTGTGTGAATTACTCTTTTCCAGAGAAAGAAGTTATTTTTATTAGCT	VAVKMLSVTAPTPQLQAFKNEVGVLR*ACVNYSFPEKEVIFIS	51	67	48	13	14	22		490.975	559.424	404.514	127.241	123.472	198.416		484.971	149.71		3.2394
TGTGGCAGTGAAAATGTTGAATGTGACAGCACCTACACCTCAGTTACAAGCCTTCAAAAATGAAGTAGGAGTACTCAGGTGAGCTTGTGTGAATTACTCTTTTCCAGAGAAAGAGGTTATTTTTATTAGCT	VAVKMLNVTAPTPQLQAFKNEVGVLR*ACVNYSFPEKEVIFIS	50	67	47	11	15	22		481.348	559.424	396.086	107.666	132.291	198.416		478.953	146.125		3.2777
TGTGGCAGTGAAAATGTTGAATGTGACAGCACCTACACCTCAGTTACAAGCCTTCAAAAATGAAGTAGGAGTACTCAGGTGAGCTTGTGTGAATTACTCTTTTCCGGAGAAAGAAGTTATTTTTATTAGCT	VAVKMLNVTAPTPQLQAFKNEVGVLR*ACVNYSFPEKEVIFIS	40	67	58	10	15	29		385.078	559.424	488.787	97.878	132.291	261.549		477.763	163.906		2.91486
TGTGGCAGTGAAAATGTTGAATGTGACAGCACCTACACCTCAGTTACGAGCCTTCAAAAATGAAGTAGGAGTACTCAGGTGAGCTTGTGTGAATTACTCTTTTCCAGAGAAAGAAGTTATTTTTATTAGCT	VAVKMLNVTAPTPQLRAFKNEVGVLR*ACVNYSFPEKEVIFIS	57	50	54	14	12	26		548.736	417.481	455.078	137.029	105.833	234.492		473.765	159.118		2.97744
TGTGGCAGTGAAAATGTTGAAGTTACAAGCCTTCAAAAATGAAGTAGGAGTACTCAGGTGAGCTTGTGTGAATTACTCTTTTCCAGAGAAAGAAGTTATTTTTATTAGCTCCTGGTTCCCAGTGGACAGTG	VAVKMLKLQAFKNEVGVLR*ACVNYSFPEKEVIFISSWFPVDS	28	86	51	19	29	67		269.555	718.067	429.796	185.968	255.763	604.268		472.472	348.666		1.35508
TGTGGCAGTGAAAATGTTGAATGTGACAGCACCTACACCTCAGTTACAAGCCTTCAAAAATGAAGTAGGAGTACTCAGGTGAGCTTGTGTGAATTACTCTTTTCCAGAGGAAGAAGTTATTTTTATTAGCT	VAVKMLNVTAPTPQLQAFKNEVGVLR*ACVNYSFPEEEVIFIS	53	48	57	10	10	27		510.229	400.782	480.36	97.878	88.1943	243.511		463.79	143.194		3.23888
TGTGGCAGTGAAAATGTTGAATGTGACAGCACCTACACCTTCAAAATGAAGTAGGAGTACTCAGGTGAGCTTGTGTGAATTACTCTTTTCCAGAGAAAGAAGTTATTTTTATTAGCTCCTGGTTCCCAGTG	VAVKMLNVTAPTPSK*SRSTQVSLCELLFSRERSYFY*LLVPS	50	37	70	55	49	121		481.348	308.936	589.916	538.329	432.152	1091.29		460.066	687.257		0.669424
TGTGGCAGTGAAAATGTTGAATGTGACAGCACCTACACCTCAGTTACAAGCCTCCAAAAATGAAGTAGGAGTACTCAGGTGAGCTTGTGTGAATTACTCTTTTCCAGAGAAAGAAGTTATTTTTATTAGCT	VAVKMLNVTAPTPQLQASKNEVGVLR*ACVNYSFPEKEVIFIS	42	65	51	7	12	16		404.332	542.725	429.796	68.5146	105.833	144.303		458.951	106.217		4.32089
TGTGGCAGTGAAAATGTTGGATGTGACAGCACCTACACCTCAGTTACAAGCCTTCAAAAATGAAGTAGGAGTACTCAGGTGAGCTTGTGTGAATTACTCTTTTCCAGAGAAAGAAGTTATTTTTATTAGCT	VAVKMLDVTAPTPQLQAFKNEVGVLR*ACVNYSFPEKEVIFIS	49	53	54	12	7	20		471.721	442.53	455.078	117.454	61.736	180.378		456.443	119.856		3.80826
TGTGGCAGTGAAAATGTTGAATGTGACAGCACCTACACCTCAGTTACAAGCCTTCAAAAATGAAGTAGGAGTACTCAGGTGAGCTTGTGTGAACTACTCTTTTCCAGAGAAAGAAGTTATTTTTATTAGCT	VAVKMLNVTAPTPQLQAFKNEVGVLR*ACVNYSFPEKEVIFIS	42	55	60	6	12	25		404.332	459.229	505.642	58.7268	105.833	225.473		456.401	130.011		3.51048
TGTGGCAGTGAAAATGTTGAATGTGACAGCACCTACACCTCAGTTACAAGCCTTCAAAAATGAAGTAGGAGTACTCAGGTGAGCTTGTGTGAATTACTCTCTTCCAGAGAAAGAAGTTATTTTTATTAGCT	VAVKMLNVTAPTPQLQAFKNEVGVLR*ACVNYSLPEKEVIFIS	48	68	40	7	13	28		462.094	567.774	337.095	68.5146	114.653	252.53		455.654	145.232		3.13742
TGTGGCAGTGAAAATGTTGAATGTGACAGCACCTACACCTCAGTTACAAGCCTTCAAAAATGAAGTAGGAGTACTCAGGGGAGCTTGTGTGAATTACTCTTTTCCAGAGAAAGAAGTTATTTTTATTAGCT	VAVKMLNVTAPTPQLQAFKNEVGVLRGACVNYSFPEKEVIFIS	52	58	45	8	11	28		500.602	484.278	379.232	78.3024	97.0137	252.53		454.704	142.615		3.18832
TGTGGCAGTGAAAATGCTGAATGTGACAGCACCTACACCTCAGTTACAAGCCTTCAAAAATGAAGTAGGAGTACTCAGGTGAGCTTGTGTGAATTACTCTTTTCCAGAGAAAGAAGTTATTTTTATTAGCT	VAVKMLNVTAPTPQLQAFKNEVGVLR*ACVNYSFPEKEVIFIS	40	52	64	18	17	29		385.078	434.18	539.352	176.18	149.93	261.549		452.87	195.886		2.3119
TGTGGCAGTGAAAATGTTGAATGTGACAGCACCTACACCTCAGTTACAAGCCTTCAAAAATGAAGTAGGAGTACTCAGGTGAGCTTGTGTGAATTACTCTTTTCCAGAGAAAGAAGTTATTTTTATTAGAT	VAVKMLNVTAPTPQLQAFKNEVGVLR*ACVNYSFPEKEVIFIR	37	62	57	7	14	30		356.197	517.676	480.36	68.5146	123.472	270.568		451.411	154.185		2.92773
TGTGGCAGTGAAAATGTTGAATGTGACAGCACCTACACCTCAGCTTCAAAAATGAAGTAGGAGTACTCAGGTGAGCTTGTGTGAATTACTCTTTTCCAGAGAAAGAAGTTATTTTTATTAGCTCCTGGTTC	VAVKMLNVTAPTPQLQK*SRSTQVSLCELLFSRERSYFY*LLV	35	53	67	59	28	97		336.943	442.53	564.634	577.48	246.944	874.835		448.036	566.42		0.790995
TGTGGCAGTGAAAATGTTGAATGTGACAGCACCTACACCTCAGCCCAGTTACAAGCCTTCAAAAATGAAGTAGGAGTACTCAGGTGAGCTTGTGTGAATTACTCTTTTCCAGAGAAAGAAGTTATTTTTAT	VAVKMLNVTAPTPQPSYKPSKMK*EYSGELV*ITLFQRKKLFL	43	73	38	60	45	118		413.959	609.522	320.24	587.268	396.874	1064.23		447.907	682.792		0.655994
TGTGGCAGTGGAAATGTTGAATGTGACAGCACCTACACCTCAGTTACAAGCCTTCAAAAATGAAGTAGGAGTACTCAGGTGAGCTTGTGTGAATTACTCTTTTCCAGAGAAAGAAGTTATTTTTATTAGCT	VAVEMLNVTAPTPQLQAFKNEVGVLR*ACVNYSFPEKEVIFIS	50	58	44	11	11	26		481.348	484.278	370.804	107.666	97.0137	234.492		445.477	146.391		3.04307
TGTGGCAGTGAAAATGTTGAATGTGACAGCACCTACACCTCAGTTACAAGCCTTCAAAAATGAAGTAGGAGTACTCAGGTGAGCTTGTGTGAATTACTCTTTTCCAGAGAAAGGAGTTATTTTTATTAGCT	VAVKMLNVTAPTPQLQAFKNEVGVLR*ACVNYSFPEKGVIFIS	48	55	49	12	6	35		462.094	459.229	412.941	117.454	52.9166	315.662		444.755	162.011		2.74522
TGTGGCAGTGAAAATGTTGAATGTGACAGCACCTACACCTCAGTTACAAGCCTTCAAAAATGAAGTAGGAGTACTCAGGTGAGCTTGTGTGAATTACTCTTTTCCAGAGAGAGAAGTTATTTTTATTAGCT	VAVKMLNVTAPTPQLQAFKNEVGVLR*ACVNYSFPEREVIFIS	48	50	51	10	11	24		462.094	417.481	429.796	97.878	97.0137	216.454		436.457	137.115		3.18314
TGTGGCAGTGAAAATGTTGAATGTGACAGCACCTACACCTCAGTTACAAGCCTTCAAAAATGAAGTAGGAGTACTCAGGTGAGCTTGTGTGAATTACTCTTTTCCAGAGAAAGAAGCTATTTTTATTAGCT	VAVKMLNVTAPTPQLQAFKNEVGVLR*ACVNYSFPEKEAIFIS	40	58	52	18	8	19		385.078	484.278	438.223	176.18	70.5554	171.36		435.86	139.365		3.12747
TGTGGCAGTGAAAATGTTGAATGTGACAGCACCTACACCTCAGTTACAAGCCTTCAGAAATGAAGTAGGAGTACTCAGGTGAGCTTGTGTGAATTACTCTTTTCCAGAGAAAGAAGTTATTTTTATTAGCT	VAVKMLNVTAPTPQLQAFRNEVGVLR*ACVNYSFPEKEVIFIS	40	66	43	8	5	23		385.078	551.075	362.377	78.3024	44.0972	207.435		432.843	109.945		3.93691
TGTGGCAGTGAAAATGTCGAATGTGACAGCACCTACACCTCAGTTACAAGCCTTCAAAAATGAAGTAGGAGTACTCAGGTGAGCTTGTGTGAATTACTCTTTTCCAGAGAAAGAAGTTATTTTTATTAGCT	VAVKMSNVTAPTPQLQAFKNEVGVLR*ACVNYSFPEKEVIFIS	38	55	55	13	8	15		365.824	459.229	463.505	127.241	70.5554	135.284		429.519	111.027		3.86861
TGTGGCAGTGAAAATGTTGAATGTGACAGCACCTACACCTCAGTTACAAGCCTTCAAAAATGAAGTAGGAGTACTCAGGTGAGCTTGTGTGAATTACTCTTTTACAGAGAAAGAAGTTATTTTTATTAGCT	VAVKMLNVTAPTPQLQAFKNEVGVLR*ACVNYSFTEKEVIFIS	32	53	61	8	10	26		308.063	442.53	514.069	78.3024	88.1943	234.492		421.554	133.663		3.15386
TGTGGCAGTGAAAATGTTGAATGTGACAGCACCTACACCTCAGGCCTTCAAAAATGAAGTAGGAGTACTCAGGTGAGCTTGTGTGAATTACTCTTTTCCAGAGAAAGAAGTTATTTTTATTAGCTCCTGGT	VAVKMLNVTAPTPQAFKNEVGVLR*ACVNYSFPEKEVIFISSW	36	41	67	38	46	90		346.57	342.334	564.634	371.936	405.694	811.703		417.846	529.778		0.78872
TGTGGCAGTGAAAATGTTGAATGTGACAGCACCTACACCTCAGTTACAAGCCTTCAAAAATGAAGAAGGAGTACTCAGGTGAGCTTGTGTGAATTACTCTTTTCCAGAGAAAGAAGTTATTTTTATTAGCT	VAVKMLNVTAPTPQLQAFKNEEGVLR*ACVNYSFPEKEVIFIS	49	47	45	11	8	21		471.721	392.432	379.232	107.666	70.5554	189.397		414.461	122.54		3.38227
TGTGGCAGTGAAAATGTTGAACGTGACAGCACCTACACCTCAGTTACAAGCCTTCAAAAATGAAGTAGGAGTACTCAGGTGAGCTTGTGTGAATTACTCTTTTCCAGAGAAAGAAGTTATTTTTATTAGCT	VAVKMLNVTAPTPQLQAFKNEVGVLR*ACVNYSFPEKEVIFIS	39	49	50	14	10	13		375.451	409.131	421.368	137.029	88.1943	117.246		401.984	114.156		3.52134
TGTGGCAGTGAAAATGTTGAATGTGACAGCACCTACACCTCAGTTACAAGCCTTCAAAAATGAAGTAGGAGTACTCAGGTGAGCTCGTGTGAATTACTCTTTTCCAGAGAAAGAAGTTATTTTTATTAGCT	VAVKMLNVTAPTPQLQAFKNEVGVLR*ARVNYSFPEKEVIFIS	40	49	48	8	9	30		385.078	409.131	404.514	78.3024	79.3749	270.568		399.574	142.748		2.79915
TGTGGCAGTGAAAATGTTGAATGTGACAGCACCTACACCTAAGTTACAAGCCTTCAAAAATGAAGTAGGAGTACTCAGGTGAGCTTGTGTGAATTACTCTTTTCCAGAGAAAGAAGTTATTTTTATTAGCT	VAVKMLNVTAPTPKLQAFKNEVGVLR*ACVNYSFPEKEVIFIS	57	17	60	12	6	15		548.736	141.943	505.642	117.454	52.9166	135.284		398.774	101.885		3.91397
TGTGGCAGTGAAAATGTTGAATGTGACAGCACCTACACCTCAGTTACAAGCCTTCAAAAATGAAGTAGGAGTGCTCAGGTGAGCTTGTGTGAATTACTCTTTTCCAGAGAAAGAAGTTATTTTTATTAGCT	VAVKMLNVTAPTPQLQAFKNEVGVLR*ACVNYSFPEKEVIFIS	48	47	40	8	11	19		462.094	392.432	337.095	78.3024	97.0137	171.36		397.207	115.559		3.43728
TGTGGCAGTGAAAATGTTGAATATGACAGCACCTACACCTCAGTTACAAGCCTTCAAAAATGAAGTAGGAGTACTCAGGTGAGCTTGTGTGAATTACTCTTTTCCAGAGAAAGAAGTTATTTTTATTAGCT	VAVKMLNMTAPTPQLQAFKNEVGVLR*ACVNYSFPEKEVIFIS	20	93	23	6	4	12		192.539	776.514	193.829	58.7268	35.2777	108.227		387.628	67.4105		5.75025
TGTGGCAGTGAAAATGTTGAATGTGACAGCACCTACACCTCAGTTACAAGCCTTCAAAAATGAAGTAGGAGTACTCAGGTGAGCTTGTGTGAATTACTCTTTCCCAGAGAAAGAAGTTATTTTTATTAGCT	VAVKMLNVTAPTPQLQAFKNEVGVLR*ACVNYSFPEKEVIFIS	37	56	40	10	6	27		356.197	467.578	337.095	97.878	52.9166	243.511		386.957	131.435		2.94409
TGTGGCAGTGAAAATGTTGAATGTGACAGCACCTACACCTCAGTTACAAGCCTTCAAAAATGAAGTAGGAGTACTCAGGTGAGCTTGTGTGAATCACTCTTTTCCAGAGAAAGAAGTTATTTTTATTAGCT	VAVKMLNVTAPTPQLQAFKNEVGVLR*ACVNHSFPEKEVIFIS	40	46	46	9	4	16		385.078	384.082	387.659	88.0902	35.2777	144.303		385.606	89.2236		4.3218
TGTGGCAGTGAAAATGTTGAATGTGACAGCACCTACACCTCAAGTTACAAGCCTTCAAAAATGAAGTAGGAGTACTCAGGTGAGCTTGTGTGAATTACTCTTTTCCAGAGAAAGAAGTTATTTTTATTAGC	VAVKMLNVTAPTPQVTSLQK*SRSTQVSLCELLFSRERSYFY*	53	48	28	45	25	118		510.229	400.782	235.966	440.451	220.486	1064.23		382.325	575.057		0.664849
TGTGGCAGTGAAAATGTTGAATGTGACAGCACCTACAACTCAGTTACAAGCCTTCAAAAATGAAGTAGGAGTACTCAGGTGAGCTTGTGTGAATTACTCTTTTCCAGAGAAAGAAGTTATTTTTATTAGCT	VAVKMLNVTAPTTQLQAFKNEVGVLR*ACVNYSFPEKEVIFIS	46	49	35	16	8	16		442.84	409.131	294.958	156.605	70.5554	144.303		382.31	123.821		3.0876
TGTGGCAGTGAAAATGTTGAATGTGACAGCACCTACACCTCAGAAGTTACAAGCCTTCAAAAATGAAGTAGGAGTACTCAGGTGAGCTTGTGTGAATTACTCTTTTCCAGAGAAAGAAGTTATTTTTATTA	VAVKMLNVTAPTPQKLQAFKNEVGVLR*ACVNYSFPEKEVIFI	32	70	30	43	26	62		308.063	584.473	252.821	420.875	229.305	559.173		381.786	403.118		0.947082
TGTGGCAGTGAAAATGTTGAATGTGACAGCACCTACACCTCAGCATACAAGCCTTCAAAAATGAAGTAGGAGTACTCAGGTGAGCTTGTGTGAATTACTCTTTTCCAGAGAAAGAAGTTATTTTTATTAGC	VAVKMLNVTAPTPQHTSLQK*SRSTQVSLCELLFSRERSYFY*	58	22	46	65	55	154		558.363	183.692	387.659	636.207	485.069	1388.91		376.571	836.73		0.450051
TGTGGCAGTGAAAATGTTGAATGTGACAGCACCTACACCTCCCAGTTACAAGCCTTCAAAAATGAAGTAGGAGTACTCAGGTGAGCTTGTGTGAATTACTCTTTTCCAGAGAAAGAAGTTATTTTTATTAG	VAVKMLNVTAPTPPSYKPSKMK*EYSGELV*ITLFQRKKLFLL	44	26	58	30	26	65		423.586	217.09	488.787	293.634	229.305	586.23		376.488	369.723		1.0183
TGTGGCAGTGAAAATGTTGAATGTGACAGCACCTACACCTCAGTTACAAGCCTTCAAAAATGAAGTAGGAGCACTCAGGTGAGCTTGTGTGAATTACTCTTTTCCAGAGAAAGAAGTTATTTTTATTAGCT	VAVKMLNVTAPTPQLQAFKNEVGALR*ACVNYSFPEKEVIFIS	40	40	48	11	5	17		385.078	333.985	404.514	107.666	44.0972	153.322		374.526	101.695		3.68284
TGTGGCAGTGAAAATGTTGAATGTGACAGCACCTACAGCCTTCAAAAATGAAGTAGGAGTACTCAGGTGAGCTTGTGTGAATTACTCTTTTCCAGAGAAAGAAGTTATTTTTATTAGCTCCTGGTTCCCAG	VAVKMLNVTAPTAFKNEVGVLR*ACVNYSFPEKEVIFISSWFP	35	56	35	17	17	53		336.943	467.578	294.958	166.393	149.93	478.003		366.493	264.775		1.38417
TGTGGCAGTGAAAATGTTGAATGTGACAGCACCTACACCTCAGTTACAAGCCTTCAAAAATGAAGTAGGAGTACTCAGGTGAGCTTGTGTGAATTACTCTTTTCCAGAGAAAGAAGTTATTTTTATTGGCT	VAVKMLNVTAPTPQLQAFKNEVGVLR*ACVNYSFPEKEVIFIG	34	55	37	10	6	19		327.316	459.229	311.813	97.878	52.9166	171.36		366.119	107.385		3.40942
TGTGGCAGTGAAAATGTTGAATGTGACAGCACCTACACCTCAGCACTTCAAAAATGAAGTAGGAGTACTCAGGTGAGCTTGTGTGAATTACTCTTTTCCAGAGAAAGAAGTTATTTTTATTAGCTCCTGGT	VAVKMLNVTAPTPQHFKNEVGVLR*ACVNYSFPEKEVIFISSW	10	59	59	5	14	37		96.2696	492.627	497.215	48.939	123.472	333.7		362.037	168.704		2.14599
TGTGGCAGTGAAAATGTTGAATGTGACAGCACCTACACCTCAGTTACAAGCCTTCGAAAATGAAGTAGGAGTACTCAGGTGAGCTTGTGTGAATTACTCTTTTCCAGAGAAAGAAGTTATTTTTATTAGCT	VAVKMLNVTAPTPQLQAFENEVGVLR*ACVNYSFPEKEVIFIS	40	44	39	9	7	18		385.078	367.383	328.667	88.0902	61.736	162.341		360.376	104.056		3.4633
TGTGGCAGTGAAAATGTTGAATGTGACAGCACCTACAAACCAGTTACAAGCCTTCAAAAATGAAGTAGGAGTACTCAGGTGAGCTTGTGTGAATTACTCTTTTCCAGAGAAAGAAGTTATTTTTATTAGCT	VAVKMLNVTAPTNQLQAFKNEVGVLR*ACVNYSFPEKEVIFIS	87	20	9	11	4	11		837.545	166.992	75.8463	107.666	35.2777	99.2081		360.128	80.7172		4.4616
TGTGGCAGTGAAAATGTTGAATGTGACAGCACCTACACCTACAGTTACAAGCCTTCAAAAATGAAGTAGGAGTACTCAGGTGAGCTTGTGTGAATTACTCTTTTCCAGAGAAAGAAGTTATTTTTATTAGC	VAVKMLNVTAPTPTVTSLQK*SRSTQVSLCELLFSRERSYFY*	34	29	60	53	30	108		327.316	242.139	505.642	518.753	264.583	974.044		358.366	585.793		0.611762
TGTGGCAGTGAAAATGTTGAATGTGACAGCACCTACACCTCAGTTACAAGCCTTCAAAAATGAAGGAGGAGTACTCAGGTGAGCTTGTGTGAATTACTCTTTTCCAGAGAAAGAAGTTATTTTTATTAGCT	VAVKMLNVTAPTPQLQAFKNEGGVLR*ACVNYSFPEKEVIFIS	32	52	39	11	5	17		308.063	434.18	328.667	107.666	44.0972	153.322		356.97	101.695		3.51021
TGTGGCAGTGAAAATGTTGAATGTGACAGCACCTACACCTCAGTTACAAGCCTTCAAAAATGAAGTAGGAGTACTCAGGTGAGCTTGTGTGAATTACTCTTTTCAAGAGAAAGAAGTTATTTTTATTAGCT	VAVKMLNVTAPTPQLQAFKNEVGVLR*ACVNYSFQEKEVIFIS	31	54	38	17	7	33		298.436	450.879	320.24	166.393	61.736	297.624		356.518	175.251		2.03433
TGTGGCAGTGAAAATGTTGAATGTGACAGCACCTACACCTCAGTTACAAGCCTTCAAAAATGAAGTAGGAGTACTCAGGTGAGCTTGTGTGAATTACTCTTTTCCAGAGAAAGAAGTTATCTTTATTAGCT	VAVKMLNVTAPTPQLQAFKNEVGVLR*ACVNYSFPEKEVIFIS	27	44	51	12	3	15		259.928	367.383	429.796	117.454	26.4583	135.284		352.369	93.0652		3.78626
TGTGGCAGTGAAAATGTTGAATGTGACAGCACCTACACCTTGTTACAAGCCTTCAAAAATGAAGTAGGAGTACTCAGGTGAGCTTGTGTGAATTACTCTTTTCCAGAGAAAGAAGTTATTTTTATTAGCTC	VAVKMLNVTAPTPCYKPSKMK*EYSGELV*ITLFQRKKLFLLA	17	49	56	40	35	109		163.658	409.131	471.933	391.512	308.68	983.062		348.241	561.085		0.620656
TGTGGCAGTGAAAATGTTGAATGTGACAGCACCTACACCTCAGTTACAAGCCTTCAAAAATGAAGTAGGAGTACTCAGGAGAGCTTGTGTGAATTACTCTTTTCCAGAGAAAGAAGTTATTTTTATTAGCT	VAVKMLNVTAPTPQLQAFKNEVGVLRRACVNYSFPEKEVIFIS	38	39	41	9	7	20		365.824	325.635	345.522	88.0902	61.736	180.378		345.66	110.068		3.14042
TGTGGCAGTGAAAATGTTGAATGTGACAGCACCTACACCTCAGTCACAAGCCTTCAAAAATGAAGTAGGAGTACTCAGGTGAGCTTGTGTGAATTACTCTTTTCCAGAGAAAGAAGTTATTTTTATTAGCT	VAVKMLNVTAPTPQSQAFKNEVGVLR*ACVNYSFPEKEVIFIS	33	35	49	9	9	27		317.69	292.237	412.941	88.0902	79.3749	243.511		340.956	136.992		2.48887
TGTGGCAGTGAAAATGTTGAATGTGACAGCACCTACACCTCAGTTACAAGCCTTCAAAAATGAAGTAGGAGTACTCAGGTGAGCTTGTGTGAATTACTCTTTTCCAGAGAAAGAAGTTATTCTTATTAGCT	VAVKMLNVTAPTPQLQAFKNEVGVLR*ACVNYSFPEKEVILIS	46	37	32	7	3	23		442.84	308.936	269.676	68.5146	26.4583	207.435		340.484	100.803		3.37773
TGTGGCAGTGAAAATGTTGAATGTGACAGCACCTACACCTCAGTTACAAGCCTTCAAAAATGAAGTAGGAGTACTCAGGTGAGCTTGTGTGAATTTCTCTTTTCCAGAGAAAGAAGTTATTTTTATTAGCT	VAVKMLNVTAPTPQLQAFKNEVGVLR*ACVNFSFPEKEVIFIS	9	17	94	4	4	8		86.6426	141.943	792.173	39.1512	35.2777	72.1514		340.253	48.8601		6.96382
TGTGGCAGTGAAAATGTTGAATGTGACAGCACCTACACCTCTGTTACAAGCCTTCAAAAATGAAGTAGGAGTACTCAGGTGAGCTTGTGTGAATTACTCTTTTCCAGAGAAAGAAGTTATTTTTATTAGCT	VAVKMLNVTAPTPLLQAFKNEVGVLR*ACVNYSFPEKEVIFIS	84	8	15	8	3	13		808.664	66.7969	126.411	78.3024	26.4583	117.246		333.957	74.0022		4.5128
TGTGGCAGTGAAAATGTTGAATGTGACAGCACCTACACCTCAGTTACAAGCCTTCAAAAACGAAGTAGGAGTACTCAGGTGAGCTTGTGTGAATTACTCTTTTCCAGAGAAAGAAGTTATTTTTATTAGCT	VAVKMLNVTAPTPQLQAFKNEVGVLR*ACVNYSFPEKEVIFIS	33	46	34	8	4	10		317.69	384.082	286.531	78.3024	35.2777	90.1892		329.434	67.9231		4.8501
TGTGGCAGTGAAAATGTTGAATGTGACAGCACCTACACCTCAGTTACAAGCCTTCAAAAATGAAGTAGGAGTACTCAGGTGAGCTTGTGTGAATTGCTCTTTTCCAGAGAAAGAAGTTATTTTTATTAGCT	VAVKMLNVTAPTPQLQAFKNEVGVLR*ACVNCSFPEKEVIFIS	45	32	34	9	6	19		433.213	267.188	286.531	88.0902	52.9166	171.36		328.977	104.122		3.15953
TGTGGCAGTGAAAATGTTGAATGTGACAGCACCTACACCTCAGTTCAAAAATGAAGTAGGAGTACTCAGGTGAGCTTGTGTGAATTACTCTTTTCCAGAGAAAGAAGTTATTTTTATTAGCTCCTGGTTCC	VAVKMLNVTAPTPQFKNEVGVLR*ACVNYSFPEKEVIFISSWF	32	24	56	23	24	64		308.063	200.391	471.933	225.119	211.666	577.211		326.795	337.999		0.966853
TGTGGCAGTGAAAATGTTGAATGTGACAGCACCTACACCTCAATTACAAGCCTTCAAAAATGAAGTAGGAGTACTCAGGTGAGCTTGTGTGAATTACTCTTTTCCAGAGAAAGAAGTTATTTTTATTAGCT	VAVKMLNVTAPTPQLQAFKNEVGVLR*ACVNYSFPEKEVIFIS	19	52	43	9	8	14		182.912	434.18	362.377	88.0902	70.5554	126.265		326.49	94.9702		3.43781
TGTGGCAGTGAAAATGTTGAATGTGACAGCACCTAGTTACAAGCCTTCAAAAATGAAGTAGGAGTACTCAGGTGAGCTTGTGTGAATTACTCTTTTCCAGAGAAAGAAGTTATTTTTATTAGCTCCTGGTT	VAVKMLNVTAPSYKPSKMK*EYSGELV*ITLFQRKKLFLLAPG	46	32	31	35	34	71		442.84	267.188	261.248	342.573	299.861	640.343		323.759	427.592		0.757167
TGTGGCAGTGAAAATGTTGAATGTGACAGTACCTACACCTCAGTTACAAGCCTTCAAAAATGAAGTAGGAGTACTCAGGTGAGCTTGTGTGAATTACTCTTTTCCAGAGAAAGAAGTTATTTTTATTAGCT	VAVKMLNVTVPTPQLQAFKNEVGVLR*ACVNYSFPEKEVIFIS	36	40	34	4	4	14		346.57	333.985	286.531	39.1512	35.2777	126.265		322.362	66.8979		4.81871
TGTGGCAGTGAAAATGTTGAATGTGACAGCACCTACACCTCAGTTACAAGCCTTCAAAAATGAAGTAGGAGTACTCAGGTGAGCTTGTGTGAGTTACTCTTTTCCAGAGAAAGAAGTTATTTTTATTAGCT	VAVKMLNVTAPTPQLQAFKNEVGVLR*ACVSYSFPEKEVIFIS	35	40	35	10	6	26		336.943	333.985	294.958	97.878	52.9166	234.492		321.962	128.429		2.50693
TGTGGCAGTGAAAATGTTGAATGTGACAGCACCTACACCTGAGTTACAAGCCTTCAAAAATGAAGTAGGAGTACTCAGGTGAGCTTGTGTGAATTACTCTTTTCCAGAGAAAGAAGTTATTTTTATTAGCT	VAVKMLNVTAPTPELQAFKNEVGVLR*ACVNYSFPEKEVIFIS	16	86	11	7	5	10		154.031	718.067	92.7011	68.5146	44.0972	90.1892		321.6	67.6003		4.75737
TGTGGCAGTGAAAATGTTGAATGTGACAGCACCTCAGTTACAAGCCTTCAAAAATGAAGTAGGAGTACTCAGGTGAGCTTGTGTGAATTACTCTTTTCCAGAGAAAGAAGTTATTTTTATTAGCTCCTGGT	VAVKMLNVTAPQLQAFKNEVGVLR*ACVNYSFPEKEVIFISSW	32	45	33	39	39	99		308.063	375.733	278.103	381.724	343.958	892.873		320.633	539.518		0.594294
TGTGGCAGTGAAAGTGTTGAATGTGACAGCACCTACACCTCAGTTACAAGCCTTCAAAAATGAAGTAGGAGTACTCAGGTGAGCTTGTGTGAATTACTCTTTTCCAGAGAAAGAAGTTATTTTTATTAGCT	VAVKVLNVTAPTPQLQAFKNEVGVLR*ACVNYSFPEKEVIFIS	26	45	38	11	5	11		250.301	375.733	320.24	107.666	44.0972	99.2081		315.425	83.657		3.77045
TGTGGCAGTGAAAATGTTGAATGTGACAGCACATACGTTACAAGCCTTCAAAAATGAAGTAGGAGTACTCAGGTGAGCTTGTGTGAATTACTCTTTTCCAGAGAAAGAAGTTATTTTTATTAGCTCCTGGT	VAVKMLNVTAHTLQAFKNEVGVLR*ACVNYSFPEKEVIFISSW	0	112	0	0	0	0		0	935.157	0	0	0	0		311.719	0		-1
TGTGACAGTGAAAATGTTGAATGTGACAGCACCTACACCTCAGTTACAAGCCTTCAAAAATGAAGTAGGAGTACTCAGGTGAGCTTGTGTGAATTACTCTTTTCCAGAGAAAGAAGTTATTTTTATTAGCT	VTVKMLNVTAPTPQLQAFKNEVGVLR*ACVNYSFPEKEVIFIS	28	39	39	4	6	19		269.555	325.635	328.667	39.1512	52.9166	171.36		307.952	87.8091		3.50707
TGTGGCAGTGAAAATGTTGAATGTGACAGCACCTACACCTCAGTTACAAGCCTTCAAAAATGAAGTAGGAGTACTCAGGTGAGCTTGTGTGAATTACTCTTTTCCAGAGAAAGAAGTTATTTTTATCAGCT	VAVKMLNVTAPTPQLQAFKNEVGVLR*ACVNYSFPEKEVIFIS	27	36	43	6	9	20		259.928	300.586	362.377	58.7268	79.3749	180.378		307.63	106.16		2.8978
TGTGGCAGTGAAAATGTTGAATGTGACAGCACCTACACCTCAGTTACAAGCCTTCAAAAATGAAGTAGGAGTACTCAGGTGAGCTTGTGTGAATTACTCTTTTCCAGAGAAAGAAGTTACTTTTATTAGCT	VAVKMLNVTAPTPQLQAFKNEVGVLR*ACVNYSFPEKEVTFIS	25	26	55	6	5	25		240.674	217.09	463.505	58.7268	44.0972	225.473		307.09	109.432		2.80621
TGTGGTAGTGAAAATGTTGAATGTGACAGCACCTACACCTCAGTTACAAGCCTTCAAAAATGAAGTAGGAGTACTCAGGTGAGCTTGTGTGAATTACTCTTTTCCAGAGAAAGAAGTTATTTTTATTAGCT	VVVKMLNVTAPTPQLQAFKNEVGVLR*ACVNYSFPEKEVIFIS	33	43	29	11	1	11		317.69	359.033	244.394	107.666	8.81943	99.2081		307.039	71.8978		4.27049
TGTGGCAGTGAAAATGTTGAATGTGACAACACCTACACCTCAGTTACAAGCCTTCAAAAATGAAGTAGGAGTACTCAGGTGAGCTTGTGTGAATTACTCTTTTCCAGAGAAAGAAGTTATTTTTATTAGCT	VAVKMLNVTTPTPQLQAFKNEVGVLR*ACVNYSFPEKEVIFIS	25	29	52	4	5	21		240.674	242.139	438.223	39.1512	44.0972	189.397		307.012	90.8819		3.37814
TGTGGCAGTGAAAATGTTGAATGTGACCAGTTACAAGCCTTCAAAAATGAAGTAGGAGTACTCAGGTGAGCTTGTGTGAATTACTCTTTTCCAGAGAAAGAAGTTATTTTTATTAGCTCCTGGTTCCCAGT	VAVKMLNVTSYKPSKMK*EYSGELV*ITLFQRKKLFLLAPGSQ	3	1	104	20	2	23		28.8809	8.34962	876.446	195.756	17.6389	207.435		304.559	140.277		2.17113
TGTGGCAGTGAAAATGTTGAATGTGACAGCACCTACACCTCAGTTGCAAGCCTTCAAAAATGAAGTAGGAGTACTCAGGTGAGCTTGTGTGAATTACTCTTTTCCAGAGAAAGAAGTTATTTTTATTAGCT	VAVKMLNVTAPTPQLQAFKNEVGVLR*ACVNYSFPEKEVIFIS	32	39	33	10	9	25		308.063	325.635	278.103	97.878	79.3749	225.473		303.934	134.242		2.26407
TGTAGCAGTGAAAATGTTGAATGTGACAGCACCTACACCTCAGTTACAAGCCTTCAAAAATGAAGTAGGAGTACTCAGGTGAGCTTGTGTGAATTACTCTTTTCCAGAGAAAGAAGTTATTTTTATTAGCT	VAVKMLNVTAPTPQLQAFKNEVGVLR*ACVNYSFPEKEVIFIS	26	50	28	7	2	12		250.301	417.481	235.966	68.5146	17.6389	108.227		301.249	64.7935		4.64937
TGTGGCAGTGAAAATGTTGAATGTGACAGCACCTACACCTCAGTTACAAGCATTCAAAAATGAAGTAGGAGTACTCAGGTGAGCTTGTGTGAATTACTCTTTTCCAGAGAAAGAAGTTATTTTTATTAGCT	VAVKMLNVTAPTPQLQAFKNEVGVLR*ACVNYSFPEKEVIFIS	27	35	40	11	5	15		259.928	292.237	337.095	107.666	44.0972	135.284		296.42	95.6823		3.09796
TGTGGCAGTGAAAATGTTGAATGTGACAGCACCTACACACAGTTACAAGCCTTCAAAAATGAAGTAGGAGTACTCAGGTGAGCTTGTGTGAATTACTCTTTTCCAGAGAAAGAAGTTATTTTTATTAGCTC	VAVKMLNVTAPTHSYKPSKMK*EYSGELV*ITLFQRKKLFLLA	41	13	44	32	26	131		394.705	108.545	370.804	313.21	229.305	1181.48		291.351	574.665		0.506994
TGTGGCAGTGAAAATGTTGAATGTGACAGCACCTACACCTCAGCAGTACAAGCCTTCAAAAATGAAGTAGGAGTACTCAGGTGAGCTTGTGTGAATTACTCTTTTCCAGAGAAAGAAGTTATTTTTATTAG	VAVKMLNVTAPTPQQYKPSKMK*EYSGELV*ITLFQRKKLFLL	41	24	32	47	50	107		394.705	200.391	269.676	460.027	440.972	965.025		288.257	622.008		0.46343
TGTGGCAGTGAAAATGTTGAATGTGCAGTTACAAGCCTTCAAAAATGAAGTAGGAGTACTCAGGTGAGCTTGTGTGAATTACTCTTTTCCAGAGAAAGAAGTTATTTTTATTAGCTCCTGGTTCCCAGTGG	VAVKMLNVQLQAFKNEVGVLR*ACVNYSFPEKEVIFISSWFPV	12	61	28	6	3	23		115.523	509.327	235.966	58.7268	26.4583	207.435		286.939	97.5401		2.94175
TGTGGCAGTGAAAATGTTGAATGTGACAGCACCTACACCTCAGTTACAAGACTTCAAAAATGAAGTAGGAGTACTCAGGTGAGCTTGTGTGAATTACTCTTTTCCAGAGAAAGAAGTTATTTTTATTAGCT	VAVKMLNVTAPTPQLQDFKNEVGVLR*ACVNYSFPEKEVIFIS	21	41	37	6	4	25		202.166	342.334	311.813	58.7268	35.2777	225.473		285.438	106.493		2.68035
TGTGGCAGTGAAAATGTTGAATGTGACAGCACCTACACCTCAGCGTTACAAGCCTTCAAAAATGAAGTAGGAGTACTCAGGTGAGCTTGTGTGAATTACTCTTTTCCAGAGAAAGAAGTTATTTTTATTAG	VAVKMLNVTAPTPQRYKPSKMK*EYSGELV*ITLFQRKKLFLL	34	47	16	31	44	84		327.316	392.432	134.838	303.422	388.055	757.589		284.862	483.022		0.58975
TGTGGCAGTGAAAATGTTGAATGTGACAGCATTCAAAAATGAAGTAGGAGTACTCAGGTGAGCTTGTGTGAATTACTCTTTTCCAGAGAAAGAAGTTATTTTTATTAGCTCCTGGTTCCCAGTGGACAGTG	VAVKMLNVTAFKNEVGVLR*ACVNYSFPEKEVIFISSWFPVDS	8	61	31	27	34	48		77.0156	509.327	261.248	264.271	299.861	432.908		282.53	332.347		0.850107
TGTGGCAGTGAAAATGTTGAATGTGACAGCACCTACACCTCTCTTTTCCAGAGAAAGAAGTTATTTTTATTAGCTCCTGGTTCCCAGTGGACAGTGCAGGGGAAAGAATAGTAGAAGATCGGAAGAGCACA	VAVKMLNVTAPTPLFSRERSYFY*LLVPSGQCRGKNSRRSEEH	12	14	71	16	16	48		115.523	116.895	598.343	156.605	141.111	432.908		276.92	243.541		1.13706
TGTGGCAGTGAAAACGTTGAATGTGACAGCACCTACACCTCAGTTACAAGCCTTCAAAAATGAAGTAGGAGTACTCAGGTGAGCTTGTGTGAATTACTCTTTTCCAGAGAAAGAAGTTATTTTTATTAGCT	VAVKTLNVTAPTPQLQAFKNEVGVLR*ACVNYSFPEKEVIFIS	32	36	26	10	4	11		308.063	300.586	219.112	97.878	35.2777	99.2081		275.92	77.4546		3.56235
TGTGGCAGTGAAAATGTTGAATGTGACAGCACCTACACCTTCAGTTACAAGCCTTCAAAAATGAAGTAGGAGTACTCAGGTGAGCTTGTGTGAATTACTCTTTTCCAGAGAAAGAAGTTATTTTTATTAGC	VAVKMLNVTAPTPSVTSLQK*SRSTQVSLCELLFSRERSYFY*	40	21	31	27	33	105		385.078	175.342	261.248	264.271	291.041	946.987		273.89	500.766		0.546941
TGTGGCAGTGAAAATGTTGAATGTGACAGCACCTACACCTCAGTTACAAGCCTTCAAAAATGAAGTAGGAGTACTCAGGTGAGCTTGTGTGAATTACTCTTTTCCAGAGAAAGAAGTTGTTTTTATTAGCT	VAVKMLNVTAPTPQLQAFKNEVGVLR*ACVNYSFPEKEVVFIS	26	37	30	5	7	25		250.301	308.936	252.821	48.939	61.736	225.473		270.686	112.049		2.41577
TGTGGCAGTGAAAATGTTGAATGTGACAGCATCTACACCTCAGTTACAAGCCTTCAAAAATGAAGTAGGAGTACTCAGGTGAGCTTGTGTGAATTACTCTTTTCCAGAGAAAGAAGTTATTTTTATTAGCT	VAVKMLNVTASTPQLQAFKNEVGVLR*ACVNYSFPEKEVIFIS	43	16	31	7	8	16		413.959	133.594	261.248	68.5146	70.5554	144.303		269.6	94.4576		2.8542
TGTGGCAGTGAAAATGTTGAATGTGACAGCACCTACACCTCAGAGAAAGAAGTTATTTTTATTAGCTCCTGGTTCCCAGTGGACAGTGCAGGGGAAAGAATAGTAGAAGATCGGAAGAGCACACGTCTGAA	VAVKMLNVTAPTPQRKKLFLLAPGSQWTVQGKE**KIGRAHV*	21	68	3	40	36	49		202.166	567.774	25.2821	391.512	317.5	441.927		265.074	383.646		0.690933
TGTGGCAGTGAAAATGTTGAATGTGACAGCACCTGCACCTCAGTTACAAGCCTTCAAAAATGAAGTAGGAGTACTCAGGTGAGCTTGTGTGAATTACTCTTTTCCAGAGAAAGAAGTTATTTTTATTAGCT	VAVKMLNVTAPAPQLQAFKNEVGVLR*ACVNYSFPEKEVIFIS	25	38	28	8	9	28		240.674	317.285	235.966	78.3024	79.3749	252.53		264.642	136.736		1.93543
TGTGGCAGTGAAAATGTTGAATGTGACAGCACCTACACCTCAGTTACAAGCCTTCAAAAATGAAGTAGGAGTACTCAGGTGAGCTTGTGTGTATTACTCTTTTCCAGAGAAAGAAGTTATTTTTATTAGCT	VAVKMLNVTAPTPQLQAFKNEVGVLR*ACVYYSFPEKEVIFIS	31	26	33	10	7	9		298.436	217.09	278.103	97.878	61.736	81.1703		264.543	80.2614		3.29602
TGTGGCAGTGAAAATGTTGAATGTGACAGCACCTACACCTCAGTTACAAGCCTTCAAAAATGAAGTAGGAGTACTCAGGTGAGCTTGTGTGAATTACTCTTTTCTAGAGAAAGAAGTTATTTTTATTAGCT	VAVKMLNVTAPTPQLQAFKNEVGVLR*ACVNYSFLEKEVIFIS	28	36	26	5	10	14		269.555	300.586	219.112	48.939	88.1943	126.265		263.084	87.7994		2.99642
TGTGGCAGTGAAAATGTTGAATGTGACAGCACCTACACCTCGTTACAAGCCTTCAAAAATGAAGTAGGAGTACTCAGGTGAGCTTGTGTGAATTACTCTTTTCCAGAGAAAGAAGTTATTTTTATTAGCTC	VAVKMLNVTAPTPRYKPSKMK*EYSGELV*ITLFQRKKLFLLA	24	46	20	33	48	130		231.047	384.082	168.547	322.997	423.333	1172.46		261.226	639.597		0.408422
TGTGGCAGTGAAAATGTTGAATGTGACAGCACCTACACCAAGCCTTCAAAAATGAAGTAGGAGTACTCAGGTGAGCTTGTGTGAATTACTCTTTTCCAGAGAAAGAAGTTATTTTTATTAGCTCCTGGTTC	VAVKMLNVTAPTPSLQK*SRSTQVSLCELLFSRERSYFY*LLV	12	55	24	25	32	88		115.523	459.229	202.257	244.695	282.222	793.665		259.003	440.194		0.588384
TGTGGCAGTGAAAATGTTGAATGTGACAGAGTTACAAGCCTTCAAAAATGAAGTAGGAGTACTCAGGTGAGCTTGTGTGAATTACTCTTTTCCAGAGAAAGAAGTTATTTTTATTAGCTCCTGGTTCCCAG	VAVKMLNVTELQAFKNEVGVLR*ACVNYSFPEKEVIFISSWFP	37	9	40	2	0	1		356.197	75.1465	337.095	19.5756	0	9.01892		256.146	9.53151		26.8736
TGTGGCAGTGAAAATGTTGAATGTGACAGCACCTACACCTCATCAGTTACAAGCCTTCAAAAATGAAGTAGGAGTACTCAGGTGAGCTTGTGTGAATTACTCTTTTCCAGAGAAAGAAGTTATTTTTATTA	VAVKMLNVTAPTPHQLQAFKNEVGVLR*ACVNYSFPEKEVIFI	44	28	13	12	13	37		423.586	233.789	109.556	117.454	114.653	333.7		255.644	188.602		1.35547
TGTGGCAGTGAAAATGTTGAATGTGACAGCACCTACACCTCAGATGAAGTAGGAGTACTCAGGTGAGCTTGTGTGAATTACTCTTTTCCAGAGAAAGAAGTTATTTTTATTAGCTCCTGGTTCCCAGTGGA	VAVKMLNVTAPTPQMK*EYSGELV*ITLFQRKKLFLLAPGSQW	22	46	20	14	21	27		211.793	384.082	168.547	137.029	185.208	243.511		254.808	188.583		1.35117
TGTGGCAGTGAAAATGTTGAATGTGACAGCACCTACACCTCAGTTACAAGCCTTCAAAAATGAAGTAGGAGTACTCAGATGAGCTTGTGTGAATTACTCTTTTCCAGAGAAAGAAGTTATTTTTATTAGCT	VAVKMLNVTAPTPQLQAFKNEVGVLR*ACVNYSFPEKEVIFIS	30	34	22	9	3	18		288.809	283.887	185.402	88.0902	26.4583	162.341		252.699	92.2964		2.73791
TGTGGCAGTGAAAATGTTGAATGTGACAGCACCTACACCTCATTTACAAGCCTTCAAAAATGAAGTAGGAGTACTCAGGTGAGCTTGTGTGAATTACTCTTTTCCAGAGAAAGAAGTTATTTTTATTAGCT	VAVKMLNVTAPTPHLQAFKNEVGVLR*ACVNYSFPEKEVIFIS	16	61	11	5	2	26		154.031	509.327	92.7011	48.939	17.6389	234.492		252.02	100.357		2.51124
TGTGGCAGTGAAAATGTTGAATGTAACAGCACCTACACCTCAGTTACAAGCCTTCAAAAATGAAGTAGGAGTACTCAGGTGAGCTTGTGTGAATTACTCTTTTCCAGAGAAAGAAGTTATTTTTATTAGCT	VAVKMLNVTAPTPQLQAFKNEVGVLR*ACVNYSFPEKEVIFIS	28	34	23	3	6	14		269.555	283.887	193.829	29.3634	52.9166	126.265		249.09	69.515		3.58326
TGTGGCAGTGAAAATGTTGAATGTGACAGCACTACAAGCCTTCAAAAATGAAGTAGGAGTACTCAGGTGAGCTTGTGTGAATTACTCTTTTCCAGAGAAAGAAGTTATTTTTATTAGCTCCTGGTTCCCAG	VAVKMLNVTALQAFKNEVGVLR*ACVNYSFPEKEVIFISSWFP	4	9	75	0	1	6		38.5078	75.1465	632.053	0	8.81943	54.1135		248.569	20.9777		11.8492
TGTGGCAGTGAAAATGTTGAATGTGACAGCACCTACACCTCAGTTCAGTTACAAGCCTTCAAAAATGAAGTAGGAGTACTCAGGTGAGCTTGTGTGAATTACTCTTTTCCAGAGAAAGAAGTTATTTTTAT	VAVKMLNVTAPTPQFSYKPSKMK*EYSGELV*ITLFQRKKLFL	27	39	19	23	26	42		259.928	325.635	160.12	225.119	229.305	378.795		248.561	277.74		0.894942
TGTGGCAGTGAAAATGTTGAATGTGACAGCACCTACTTCAAAAATGAAGTAGGAGTACTCAGGTGAGCTTGTGTGAATTACTCTTTTCCAGAGAAAGAAGTTATTTTTATTAGCTCCTGGTTCCCAGTGGA	VAVKMLNVTAPTSKMK*EYSGELV*ITLFQRKKLFLLAPGSQW	5	27	56	49	35	51		48.1348	225.44	471.933	479.602	308.68	459.965		248.502	416.082		0.597243
TGAGGCAGTGAAAATGTTGAATGTGACAGCACCTACACCTCAGTTACAAGCCTTCAAAAATGAAGTAGGAGTACTCAGGTGAGCTTGTGTGAATTACTCTTTTCCAGAGAAAGAAGTTATTTTTATTAGCT	EAVKMLNVTAPTPQLQAFKNEVGVLR*ACVNYSFPEKEVIFIS	26	31	28	6	5	22		250.301	258.838	235.966	58.7268	44.0972	198.416		248.368	100.413		2.47346
TGTGGCAGTGAAAATGTTGAATGTGACAGCACCTACACCTCAGTTACAAGCCTTCAAAAATGAAGTAGGAGTACTCAGGTGAGCTTGTTTGAATTAATCTTTTCCAGAGAAAGAAGTTATTTTTATTAGCT	VAVKMLNVTAPTPQLQAFKNEVGVLR*ACLN*SFPEKEVIFIS	0	0	88	0	0	0		0	0	741.608	0	0	0		247.203	0		-1
TGTGGCAGTGAAAATGTTGAATGTGACAGCACCTACACCCCCAGTTACAAGCCTTCAAAAATGAAGTAGGAGTACTCAGGTGAGCTTGTGTGAATTACTCTTTTCCAGAGAAAGAAGTTATTTTTATTAGC	VAVKMLNVTAPTPPVTSLQK*SRSTQVSLCELLFSRERSYFY*	10	47	30	35	39	122		96.2696	392.432	252.821	342.573	343.958	1100.31		247.174	595.613		0.414991
TGTGGCAGTGAAAATGTTGAATGTGACAGCACCTACACACCAGTTACAAGCCTTCAAAAATGAAGTAGGAGTACTCAGGTGAGCTTGTGTGAATTACTCTTTTCCAGAGAAAGAAGTTATTTTTATTAGCT	VAVKMLNVTAPTHQLQAFKNEVGVLR*ACVNYSFPEKEVIFIS	14	3	68	1	4	7		134.777	25.0488	573.061	9.7878	35.2777	63.1325		244.296	36.066		6.77358
TGTGGCAGTGAAAATGTTGAATGTGACAGCACCTACAAAAATGAAGTAGGAGTACTCAGGTGAGCTTGTGTGAATTACTCTTTTCCAGAGAAAGAAGTTATTTTTATTAGCTCCTGGTTCCCAGTGGACAG	VAVKMLNVTAPTKMK*EYSGELV*ITLFQRKKLFLLAPGSQWT	21	21	42	53	39	132		202.166	175.342	353.949	518.753	343.958	1190.5		243.819	684.403		0.356251
TGTGGCAGTGAAAATGTTGAATGTGACAGCACCTACACCTCAGTTACAAGCCTTCAAAAATGAAGTAGGAGTACTCAGGTGAGCTTGTGTGAATTACTCTTTTCCAGAGAAAGAAGTTATTTTTATTAACT	VAVKMLNVTAPTPQLQAFKNEVGVLR*ACVNYSFPEKEVIFIN	25	20	38	7	7	11		240.674	166.992	320.24	68.5146	61.736	99.2081		242.635	76.4863		3.17227
TGTGGCAGTGAAAATGTTGAATGTGACAGCACCTACACCTCAGTTACAAACCTTCAAAAATGAAGTAGGAGTACTCAGGTGAGCTTGTGTGAATTACTCTTTTCCAGAGAAAGAAGTTATTTTTATTAGCT	VAVKMLNVTAPTPQLQTFKNEVGVLR*ACVNYSFPEKEVIFIS	26	36	21	8	6	12		250.301	300.586	176.975	78.3024	52.9166	108.227		242.621	79.8154		3.03977
TGTGGCAGTGAAAATGTTGAATGTGACAGCACCTACACCTCAGTTACAAGCCTTCAAAAATGAAGTAGGAGTACTCAGGTGAGCTTGTGTGAATTACTCTTTTCCAGAGAAAGAAGTTATTTTTACTAGCT	VAVKMLNVTAPTPQLQAFKNEVGVLR*ACVNYSFPEKEVIFTS	25	32	26	0	5	15		240.674	267.188	219.112	0	44.0972	135.284		242.324	59.7937		4.05268
TGTGGCAGTGAAAATGTTGAATGTGACAGCACCTACACCTCAGTTACAAGCCTTCAAAAATGAAGTAGGTGTACTCAGGTGAGCTTGTGTGAATTACTCTTTTCCAGAGAAAGAAGTTATTTTTATTAGCT	VAVKMLNVTAPTPQLQAFKNEVGVLR*ACVNYSFPEKEVIFIS	10	69	6	2	4	7		96.2696	576.123	50.5642	19.5756	35.2777	63.1325		240.986	39.3286		6.12749
TGTGGCAGTGAAAATGTTGAATGTGACAGCACCTACACCTCCTTCAAAAATGAAGTAGGAGTACTCAGGTGAGCTTGTGTGAATTACTCTTTTCCAGAGAAAGAAGTTATTTTTATTAGCTCCTGGTTCCC	VAVKMLNVTAPTPPSKMK*EYSGELV*ITLFQRKKLFLLAPGS	49	25	5	5	23	28		471.721	208.74	42.1368	48.939	202.847	252.53		240.866	168.105		1.43283
TGTGGCAGTGAAAATGTTGAATGTGACAGCACCTACACCTCAGGCTTTACAAGCCTTCAAAAATGAAGTAGGAGTACTCAGGTGAGCTTGTGTGAATTACTCTTTTCCAGAGAAAGAAGTTATTTTTATTA	VAVKMLNVTAPTPQALQAFKNEVGVLR*ACVNYSFPEKEVIFI	32	48	0	0	2	4		308.063	400.782	0	0	17.6389	36.0757		236.281	17.9048		13.1965
TGTGGCAGTGAAAATGTTGAATGTGTTACAAGCCTTCAAAAATGAAGTAGGAGTACTCAGGTGAGCTTGTGTGAATTACTCTTTTCCAGAGAAAGAAGTTATTTTTATTAGCTCCTGGTTCCCAGTGGACA	VAVKMLNVLQAFKNEVGVLR*ACVNYSFPEKEVIFISSWFPVD	23	25	33	23	9	49		221.42	208.74	278.103	225.119	79.3749	441.927		236.088	248.807		0.948879
TGTGGCAGTGAAAATGTTGAATGTGACAGCACCTACACCTCAGTTACAAGCCTTCAAAAATGAAGTAGGAGTACTTAGGTGAGCTTGTGTGAATTACTCTTTTCCAGAGAAAGAAGTTATTTTTATTAGCT	VAVKMLNVTAPTPQLQAFKNEVGVLR*ACVNYSFPEKEVIFIS	29	27	24	10	6	12		279.182	225.44	202.257	97.878	52.9166	108.227		235.626	86.3406		2.72903
TGTGGCAGTGAAAATGTTGAATGTGACAGCACCTACACCTCAGCGGTTACAAGCCTTCAAAAATGAAGTAGGAGTACTCAGGTGAGCTTGTGTGAATTACTCTTTTCCAGAGAAAGAAGTTATTTTTATTA	VAVKMLNVTAPTPQRLQAFKNEVGVLR*ACVNYSFPEKEVIFI	39	27	12	41	47	63		375.451	225.44	101.128	401.3	414.513	568.192		234.006	461.335		0.507237
TGTGGCAGTGAAAATGTTGAATGTGACAGCACCTACACCGTTACAAGCCTTCAAAAATGAAGTAGGAGTACTCAGGTGAGCTTGTGTGAATTACTCTTTTCCAGAGAAAGAAGTTATTTTTATTAGCTCCT	VAVKMLNVTAPTPLQAFKNEVGVLR*ACVNYSFPEKEVIFISS	8	16	58	34	48	89		77.0156	133.594	488.787	332.785	423.333	802.684		233.132	519.601		0.448676
TGTGGCAGTGAAAATGTTGAATGTGACAGCACCTACACCTCAGTTACAAGCCTTCAAACATGAAGTAGGAGTACTCAGGTGAGCTTGTGTGAATTACTCTTTTCCAGAGAAAGAAGTTATTTTTATTAGCT	VAVKMLNVTAPTPQLQAFKHEVGVLR*ACVNYSFPEKEVIFIS	21	24	35	4	5	12		202.166	200.391	294.958	39.1512	44.0972	108.227		232.505	63.8251		3.64284
TGTGGCAGTGAAAATGTTGAATGTGACAGCACCTACACCTCAAAATGTACAAGCCTTCAAAAATGAAGTAGGAGTACTCAGGTGAGCTTGTGTGAATTACTCTTTTCCAGAGAAAGAAGTTATTTTTATTA	VAVKMLNVTAPTPQNVQAFKNEVGVLR*ACVNYSFPEKEVIFI	5	10	67	2	0	11		48.1348	83.4962	564.634	19.5756	0	99.2081		232.088	39.5946		5.86162
TGTGGCAGTGAAAATGTTGAATGTGACAGCACCTACACCTTCAAAAATGAAGTTACAAGCCTTCAAAAATGAAGTAGGAGTACTCAGGTGAGCTTGTGTGAATTACTCTTTTCCAGAGAAAGAAGTTATTT	VAVKMLNVTAPTPSKMKLQAFKNEVGVLR*ACVNYSFPEKEVI	16	13	51	9	5	22		154.031	108.545	429.796	88.0902	44.0972	198.416		230.791	110.201		2.09427
TGTGGCAGTGAAAATGTTGAATGTGACAGCACCTATACCTCAGTTACAAGCCTTCAAAAATGAAGTAGGAGTACTCAGGTGAGCTTGTGTGAATTACTCTTTTCCAGAGAAAGAAGTTATTTTTATTAGCT	VAVKMLNVTAPIPQLQAFKNEVGVLR*ACVNYSFPEKEVIFIS	24	30	25	3	5	16		231.047	250.488	210.684	29.3634	44.0972	144.303		230.74	72.5878		3.17877
TGTGGCAGTGAAAATGTTGAATGTGACAGCACCTACACCTCAGTTACAAGCCTTCAAAAATGAAGTAGGAGTACTCAGGTGAGCTTGTGTGAATTACTCTTTTCCAAAGAAAGAAGTTATTTTTATTAGCT	VAVKMLNVTAPTPQLQAFKNEVGVLR*ACVNYSFPKKEVIFIS	34	20	23	8	2	18		327.316	166.992	193.829	78.3024	17.6389	162.341		229.379	86.094		2.66429
TGTGGCAGTGAAAATGTTGAATGTGATAGCACCTACACCTCAGTTACAAGCCTTCAAAAATGAAGTAGGAGTACTCAGGTGAGCTTGTGTGAATTACTCTTTTCCAGAGAAAGAAGTTATTTTTATTAGCT	VAVKMLNVIAPTPQLQAFKNEVGVLR*ACVNYSFPEKEVIFIS	20	31	28	3	1	11		192.539	258.838	235.966	29.3634	8.81943	99.2081		229.115	45.797		5.00283
TGTGGCAGTGAAAATGTTGAATGTGACAGCACCTACACCTCAGTTACAAGCCTTCAAAAATGAAGTAGGAGTACTCAGGTGAGCTTGTGTGAATTACTCTTTTCCAGAGAAAGAAGTCATTTTTATTAGCT	VAVKMLNVTAPTPQLQAFKNEVGVLR*ACVNYSFPEKEVIFIS	24	26	28	6	3	13		231.047	217.09	235.966	58.7268	26.4583	117.246		228.034	67.477		3.37944
TATGGCAGTGAAAATGTTGAATGTGACAGCACCTACACCTCAGTTACAAGCCTTCAAAAATGAAGTAGGAGTACTCAGGTGAGCTTGTGTGAATTACTCTTTTCCAGAGAAAGAAGTTATTTTTATTAGCT	MAVKMLNVTAPTPQLQAFKNEVGVLR*ACVNYSFPEKEVIFIS	21	32	25	7	3	11		202.166	267.188	210.684	68.5146	26.4583	99.2081		226.679	64.727		3.50208
TGTGGCAGTGAAAATGTTGAATGTGACAGCACCTACACCTCAGTTACAAGCCTTCAAAAATGAAGTAGGAGTACTCAGGTGAGCTTGTGTGAATTACTCTTTTCCAGAGAAAGAAGGTATTTTTATTAGCT	VAVKMLNVTAPTPQLQAFKNEVGVLR*ACVNYSFPEKEGIFIS	26	25	26	9	5	15		250.301	208.74	219.112	88.0902	44.0972	135.284		226.051	89.1571		2.53542
TGTGGCAGTGAAAATGTTGAATGTGACAGCACCTACACCTCAGTTACAAGCCTTCAAAAATGAAGTAGGAGTACTCAGGTGAGCTTGTGTGAATTACTCTTTTCCAGAGAAAGAAGATATTTTTATTAGCT	VAVKMLNVTAPTPQLQAFKNEVGVLR*ACVNYSFPEKEDIFIS	17	31	30	5	4	16		163.658	258.838	252.821	48.939	35.2777	144.303		225.106	76.1732		2.95519
TGTGGCAGTGAAAATGTTAAATGTGACAGCACCTACACCTCAGTTACAAGCCTTCAAAAATGAAGTAGGAGTACTCAGGTGAGCTTGTGTGAATTACTCTTTTCCAGAGAAAGAAGTTATTTTTATTAGCT	VAVKMLNVTAPTPQLQAFKNEVGVLR*ACVNYSFPEKEVIFIS	20	30	27	6	5	10		192.539	250.488	227.539	58.7268	44.0972	90.1892		223.522	64.3377		3.4742
TGTGGCAGTGAAAATGTTGAATGTGACAGCACCTACACCTCAGTTACAAGCCTTCAAAAATGAAGTAGGAGTACTCAGGTGAGCTTGTGTGAATTACTCTTTTCCAGAGAAAGAAGTTATTTTCATTAGCT	VAVKMLNVTAPTPQLQAFKNEVGVLR*ACVNYSFPEKEVIFIS	19	31	27	2	1	13		182.912	258.838	227.539	19.5756	8.81943	117.246		223.096	48.547		4.59547
TGTGGCAGTGAAAAGTAGGAGTACTCAGGTGAGCTTGTGTGAATTACTCTTTTCCAGAGAAAGAAGTTATTTTTATTAGCTCCTGGTTCCCAGTGGACAGTGCAGGGGAAAGAATAGTAGAAGATCGGAAG	VAVKSRSTQVSLCELLFSRERSYFY*LLVPSGQCRGKNSRRSE	1	0	78	0	0	5		9.62696	0	657.335	0	0	45.0946		222.321	15.0315		14.7903
TGTGGCAGTGAAAATGTTGAATGTGACAGCACCTACACCTCAGTTATTTTTATTAGCTCCTGGTTCCCAGTGGACAGTGCAGGGGAAAGAATAGTAGAAGATCGGAAGAGCACACGTCTGAACTCCAGTCA	VAVKMLNVTAPTPQLFLLAPGSQWTVQGKE**KIGRAHV*TPV	9	32	37	6	35	53		86.6426	267.188	311.813	58.7268	308.68	478.003		221.881	281.803		0.787361
TGTGGCAGTGAAAATGTTGAATGTGACAGCACCTACACCTCAGTTACAAGCCTTCAAAAATGAAGTAGGAGTACTCAGGTAAGCTTGTGTGAATTACTCTTTTCCAGAGAAAGAAGTTATTTTTATTAGCT	VAVKMLNVTAPTPQLQAFKNEVGVLR*ACVNYSFPEKEVIFIS	22	29	25	4	6	15		211.793	242.139	210.684	39.1512	52.9166	135.284		221.539	75.7839		2.9233
TGTGGCAGTGAAAATGTTGAATGTGACAGCACCTACTCAGTTACAAGCCTTCAAAAATGAAGTAGGAGTACTCAGGTGAGCTTGTGTGAATTACTCTTTTCCAGAGAAAGAAGTTATTTTTATTAGCTCCT	VAVKMLNVTAPTQLQAFKNEVGVLR*ACVNYSFPEKEVIFISS	7	40	31	11	7	21		67.3887	333.985	261.248	107.666	61.736	189.397		220.874	119.6		1.84678
TGTGGCAGTGAAAATGTTGAATGTGACAGCACTTACACCTCAGTTACAAGCCTTCAAAAATGAAGTAGGAGTACTCAGGTGAGCTTGTGTGAATTACTCTTTTCCAGAGAAAGAAGTTATTTTTATTAGCT	VAVKMLNVTALTPQLQAFKNEVGVLR*ACVNYSFPEKEVIFIS	20	28	28	7	8	9		192.539	233.789	235.966	68.5146	70.5554	81.1703		220.765	73.4134		3.00714
TGTGGCAGTGAAAATGTTGAATGTGACAGCACCTACACCTCAGAAAGAAGTTATTTTTATTAGCTCCTGGTTCCCAGTGGACAGTGCAGGGGAAAGAATAGTAGAAGATCGGAAGAGCACACGTCTGAACT	VAVKMLNVTAPTPQKEVIFISSWFPVDSAGERIVEDRKSTRLN	4	1	73	2	3	13		38.5078	8.34962	615.198	19.5756	26.4583	117.246		220.685	54.4266		4.05473
TGTGGCAGTGAAAATGTTGAATGTGACAGCACCTACACCTCAGTTACAAGCCTTCAAAAATGAAGTAGGAGTATTCAGGTGAGCTTGTGTGAATTACTCTTTTCCAGAGAAAGAAGTTATTTTTATTAGCT	VAVKMLNVTAPTPQLQAFKNEVGVFR*ACVNYSFPEKEVIFIS	20	36	20	6	7	8		192.539	300.586	168.547	58.7268	61.736	72.1514		220.558	64.2047		3.43522
TGTGGCAGTGAAAATGTTGAATGTGACAGCACCTACACCTCAGTTACAAGCCTTCAAAAATGAAGTAGGAGTACTCAGGTGAGCTTGTGTGAATTACTCTTTTTCAGAGAAAGAAGTTATTTTTATTAGCT	VAVKMLNVTAPTPQLQAFKNEVGVLR*ACVNYSFSEKEVIFIS	19	31	26	5	10	18		182.912	258.838	219.112	48.939	88.1943	162.341		220.287	99.8246		2.20674
TGTGGCAGTGAAAATGTTGAATGTGACAGCACCTACACTTCAGTTACAAGCCTTCAAAAATGAAGTAGGAGTACTCAGGTGAGCTTGTGTGAATTACTCTTTTCCAGAGAAAGAAGTTATTTTTATTAGCT	VAVKMLNVTAPTLQLQAFKNEVGVLR*ACVNYSFPEKEVIFIS	24	28	23	7	3	29		231.047	233.789	193.829	68.5146	26.4583	261.549		219.555	118.841		1.84748
TGTGGCAGTGAAAATGTTGAATGTGACAGCACCTACACCTCAGTTACAAGCCTTCAAAAATGAAGTAGAAGTACTCAGGTGAGCTTGTGTGAATTACTCTTTTCCAGAGAAAGAAGTTATTTTTATTAGCT	VAVKMLNVTAPTPQLQAFKNEVEVLR*ACVNYSFPEKEVIFIS	16	37	23	12	7	15		154.031	308.936	193.829	117.454	61.736	135.284		218.932	104.824		2.08856
TGTGGCAGTGAAAATGAAGTAGGAGTACTCAGGTGAGCTTGTGTGAATTACTCTTTTCCAGAGAAAGAAGTTATTTTTATTAGCTCCTGGTTCCCAGTGGACAGTGCAGGGGAAAGAATAGTAGAAGATCG	VAVKMK*EYSGELV*ITLFQRKKLFLLAPGSQWTVQGKE**KI	35	17	21	54	39	136		336.943	141.943	176.975	528.541	343.958	1226.57		218.621	699.691		0.312453
TGTGGCAGTGAAAATGTTGAATGTGACAGCACCTACACCTCAGTTACAAGCCTTCAAAAATGAAGTAGGAGTACTCAGGTGAGCTTGTGTGAATTACTATTTTCCAGAGAAAGAAGTTATTTTTATTAGCT	VAVKMLNVTAPTPQLQAFKNEVGVLR*ACVNYYFPEKEVIFIS	20	35	20	3	3	10		192.539	292.237	168.547	29.3634	26.4583	90.1892		217.774	48.6703		4.47448
TGTGGCAGTGAAAATGTTGAATGTGACAGCACCTACACCTCAAAGCCTTCAAAAATGAAGTAGGAGTACTCAGGTGAGCTTGTGTGAATTACTCTTTTCCAGAGAAAGAAGTTATTTTTATTAGCTCCTGG	VAVKMLNVTAPTPQSLQK*SRSTQVSLCELLFSRERSYFY*LL	4	27	46	19	19	53		38.5078	225.44	387.659	185.968	167.569	478.003		217.202	277.18		0.783614
TGTGGCAGTGAAAATGTTGAATGTGACAGCACCTACACCTCAGTTACAAGCCTTCAAAAATGAAGTAGGAGTACTCAGGTGAGCTTGTGTGAATTACTCTTTTCCAGAGAAAGAAGTTATTTTTATTAGTT	VAVKMLNVTAPTPQLQAFKNEVGVLR*ACVNYSFPEKEVIFIS	23	29	22	4	1	14		221.42	242.139	185.402	39.1512	8.81943	126.265		216.32	58.0785		3.72462
TGTGGCAGTGAAAATGTTGAATGTGACAGCACCTACATCTCAGTTACAAGCCTTCAAAAATGAAGTAGGAGTACTCAGGTGAGCTTGTGTGAATTACTCTTTTCCAGAGAAAGAAGTTATTTTTATTAGCT	VAVKMLNVTAPTSQLQAFKNEVGVLR*ACVNYSFPEKEVIFIS	22	33	19	8	7	8		211.793	275.537	160.12	78.3024	61.736	72.1514		215.817	70.7299		3.05128
TGTGGCAGTGAAAATGTTGAATGTGACAGCACCTAGCCTTCAAAAATGAAGTAGGAGTACTCAGGTGAGCTTGTGTGAATTACTCTTTTCCAGAGAAAGAAGTTATTTTTATTAGCTCCTGGTTCCCAGTG	VAVKMLNVTAPSLQK*SRSTQVSLCELLFSRERSYFY*LLVPS	9	58	9	18	27	35		86.6426	484.278	75.8463	176.18	238.125	315.662		215.589	243.322		0.886021
TGTGGCAGTGAAAATGTTGAATGTGACAGCACCTACACCTCAGTTACAAGCCTTCAAAAATGAAGTAAGAGTACTCAGGTGAGCTTGTGTGAATTACTCTTTTCCAGAGAAAGAAGTTATTTTTATTAGCT	VAVKMLNVTAPTPQLQAFKNEVRVLR*ACVNYSFPEKEVIFIS	27	25	21	3	7	10		259.928	208.74	176.975	29.3634	61.736	90.1892		215.214	60.4295		3.56141
TGTGGCAGTGAAAATGTTGAATGTGACAGCACCTACACCTCAGCACAAGCCTTCAAAAATGAAGTAGGAGTACTCAGGTGAGCTTGTGTGAATTACTCTTTTCCAGAGAAAGAAGTTATTTTTATTAGCTC	VAVKMLNVTAPTPQHKPSKMK*EYSGELV*ITLFQRKKLFLLA	12	21	42	35	22	53		115.523	175.342	353.949	342.573	194.027	478.003		214.938	338.201		0.635534
TGTGGCAGTGAAAATGTTGAATGTGACAGCACCTACACCTCAGCCTTCAAAATTACAAGCCTTCAAAAATGAAGTAGGAGTACTCAGGTGAGCTTGTGTGAATTACTCTTTTCCAGAGAAAGAAGTTATTT	VAVKMLNVTAPTPQPSKLQAFKNEVGVLR*ACVNYSFPEKEVI	6	57	13	4	0	6		57.7617	475.928	109.556	39.1512	0	54.1135		214.415	31.0882		6.89699
TGTGGCAGTGAAAATGTTGAATGTGACAGCACCTACACCTCAGTTACAAGTCTTCAAAAATGAAGTAGGAGTACTCAGGTGAGCTTGTGTGAATTACTCTTTTCCAGAGAAAGAAGTTATTTTTATTAGCT	VAVKMLNVTAPTPQLQVFKNEVGVLR*ACVNYSFPEKEVIFIS	17	30	27	5	8	8		163.658	250.488	227.539	48.939	70.5554	72.1514		213.895	63.8819		3.34829
TGTGGCAGTGAAAATGTTGAATGTGACAGCACCTTACAAGCCTTCAAAAATGAAGTAGGAGTACTCAGGTGAGCTTGTGTGAATTACTCTTTTCCAGAGAAAGAAGTTATTTTTATTAGCTCCTGGTTCCC	VAVKMLNVTAPYKPSKMK*EYSGELV*ITLFQRKKLFLLAPGS	56	5	6	48	23	66		539.11	41.7481	50.5642	469.814	202.847	595.249		210.474	422.637		0.498002
TGTGGCAGTGAAAATGTTGAATGTGACAGCACCTACACCTCAGTTACAAGCCTTCAAAAATGAAGTAGGAGTACTCAGGTGAGATTGTGTGAATTACTCTTTTCCAGAGAAAGAAGTTATTTTTATTAGCT	VAVKMLNVTAPTPQLQAFKNEVGVLR*DCVNYSFPEKEVIFIS	21	30	21	2	3	12		202.166	250.488	176.975	19.5756	26.4583	108.227		209.876	51.4203		4.08159
TGTGGCAGTGAAAATGTTGAATGTGACAGCACCTACACCTTAGTTACAAGCCTTCAAAAATGAAGTAGGAGTACTCAGGTGAGCTTGTGTGAATTACTCTTTTCCAGAGAAAGAAGTTATTTTTATTAGCT	VAVKMLNVTAPTP*LQAFKNEVGVLR*ACVNYSFPEKEVIFIS	17	24	31	8	5	18		163.658	200.391	261.248	78.3024	44.0972	162.341		208.432	94.9134		2.19603
TGTGGCAGTGAAAATGTTGAATGTGACAGCACCTACACCTCAGCAGGTTACAAGCCTTCAAAAATGAAGTAGGAGTACTCAGGTGAGCTTGTGTGAATTACTCTTTTCCAGAGAAAGAAGTTATTTTTATT	VAVKMLNVTAPTPQQVTSLQK*SRSTQVSLCELLFSRERSYFY	58	8	0	9	10	22		558.363	66.7969	0	88.0902	88.1943	198.416		208.387	124.9		1.66843
TGTGGCAGTGAAAATGTTGAATGTGACAGCACCTACACCTCAGTGTTACAAGCCTTCAAAAATGAAGTAGGAGTACTCAGGTGAGCTTGTGTGAATTACTCTTTTCCAGAGAAAGAAGTTATTTTTATTAG	VAVKMLNVTAPTPQCYKPSKMK*EYSGELV*ITLFQRKKLFLL	22	17	32	14	21	34		211.793	141.943	269.676	137.029	185.208	306.643		207.804	209.627		0.991305
TGTGGCAGTGAAAATGTTGAATGTGACAGCACCTACACCTCAGTTACAAGCCTTCAAAAATGCAGTAGGAGTACTCAGGTGAGCTTGTGTGAATTACTCTTTTCCAGAGAAAGAAGTTATTTTTATTAGCT	VAVKMLNVTAPTPQLQAFKNAVGVLR*ACVNYSFPEKEVIFIS	21	17	33	1	6	16		202.166	141.943	278.103	9.7878	52.9166	144.303		207.404	69.0024		3.00575
TGTGGCAGTGAAAATGTTGAATGTGACAGCACCTACACCTCAGTTACAAGCCTTCAACAATGAAGTAGGAGTACTCAGGTGAGCTTGTGTGAATTACTCTTTTCCAGAGAAAGAAGTTATTTTTATTAGCT	VAVKMLNVTAPTPQLQAFNNEVGVLR*ACVNYSFPEKEVIFIS	16	28	27	2	6	14		154.031	233.789	227.539	19.5756	52.9166	126.265		205.12	66.2524		3.09604
TGTGGCAGTGAAAATGTTGAATGTGACAGCACCTACACCTCAGTTACAAGCCTTCAAAAATGAAGTAGGAGTACTCAGGTGAGCTTGTGTGAATTACTCTTTTCCAGAGAAAGAAGTTATTTCTATTAGCT	VAVKMLNVTAPTPQLQAFKNEVGVLR*ACVNYSFPEKEVISIS	17	28	25	9	7	13		163.658	233.789	210.684	88.0902	61.736	117.246		202.711	89.0241		2.27703
TGTGGCAGTGAAAATGTTGAATGTGACAGCACCTACACCTCAGTTACAAGCCTTCAAAACTGAAGTAGGAGTACTCAGGTGAGCTTGTGTGAATTACTCTTTTCCAGAGAAAGAAGTTATTTTTATTAGCT	VAVKMLNVTAPTPQLQAFKTEVGVLR*ACVNYSFPEKEVIFIS	18	29	22	8	7	14		173.285	242.139	185.402	78.3024	61.736	126.265		200.275	88.7678		2.25617
TGTGGCAGTGAAAATGTTGAATGTGACAGCACCTACACCTCAGTTACAAGCCTTCAAAAATGAAGTAGGAGTACTCAGGTGAGTTTGTGTGAATTACTCTTTTCCAGAGAAAGAAGTTATTTTTATTAGCT	VAVKMLNVTAPTPQLQAFKNEVGVLR*VCVNYSFPEKEVIFIS	21	21	26	2	3	11		202.166	175.342	219.112	19.5756	26.4583	99.2081		198.873	48.414		4.10776
TGTGGCAGTGAAAATGTTGAATGTGACAGCACCTACACCTTTTCCAGAGAAAGAAGTTATTTTTATTAGCTCCTGGTTCCCAGTGGACAGTGCAGGGGAAAGAATAGTAGAAGATCGGAAGAGCACACGTC	VAVKMLNVTAPTPFPEKEVIFISSWFPVDSAGERIVEDRKSTR	6	24	40	30	23	30		57.7617	200.391	337.095	293.634	202.847	270.568		198.416	255.683		0.776023
TGTGGCAGTGAAAATGTTGAATGTGACAGCACCTACACCTCAGGAGTAGGTGTACTCAGGTGAGCTTGTGTGAATTACTCTTTTCCAGAGAAAGAAGTTATTTTTATTAGCTCCTGGTTCCCAGTGGACAG	VAVKMLNVTAPTPQE*VYSGELV*ITLFQRKKLFLLAPGSQWT	61	0	0	0	0	0		587.244	0	0	0	0	0		195.748	0		-1
TGTGGCAGTGAAAATGTTGAATGTGACAGCACCTACACCTCAGAGACATTTACAAGCCTTCAAAAATGAAGTAGGAGTACTCAGGTGAGCTTGTGTGAATTACTCTTTTCCAGAGAAAGAAGTTATTTTTA	VAVKMLNVTAPTPQRHLQAFKNEVGVLR*ACVNYSFPEKEVIF	0	70	0	0	0	0		0	584.473	0	0	0	0		194.824	0		-1
TGTGGCAGTGAAAATGTTGAATGTGACAGCACCTACACCTCAGTTACAAGCCTTCAAAAATGAAGTAGGAGTACTCAGGTGAGCTTGTGTGAATTACTCTTTTCCAGCGAAAGAAGTTATTTTTATTAGCT	VAVKMLNVTAPTPQLQAFKNEVGVLR*ACVNYSFPAKEVIFIS	24	17	25	4	5	4		231.047	141.943	210.684	39.1512	44.0972	36.0757		194.558	39.7747		4.89151
TGTGGCAGTGAAAATGTTGAATGTGACAGCACCTACACCTCAGTTACAAGCCTTCAAAAATGAAGTAGGAGTACTCAGGTGAGCTTGTGTGAATTATTCTTTTCCAGAGAAAGAAGTTATTTTTATTAGCT	VAVKMLNVTAPTPQLQAFKNEVGVLR*ACVNYSFPEKEVIFIS	15	26	26	7	3	4		144.404	217.09	219.112	68.5146	26.4583	36.0757		193.535	43.6829		4.43046
TGTGGCAGTGAAAATGTTGAATGTGACAGCACCTACACCTCAGTTACAAGCTTTCAAAAATGAAGTAGGAGTACTCAGGTGAGCTTGTGTGAATTACTCTTTTCCAGAGAAAGAAGTTATTTTTATTAGCT	VAVKMLNVTAPTPQLQAFKNEVGVLR*ACVNYSFPEKEVIFIS	17	29	20	12	3	13		163.658	242.139	168.547	117.454	26.4583	117.246		191.448	87.0526		2.19922
TGTGGCAGTGAAAATGTTGAATGTGACAGCACCTACACCTCAAAGCTTGTTACAAGCCTTCAAAAATGAAGTAGGAGTACTCAGGTGAGCTTGTGTGAATTACTCTTTTCCAGAGAAAGAAGTTATTTTTA	VAVKMLNVTAPTPQSLLQAFKNEVGVLR*ACVNYSFPEKEVIF	59	0	0	0	0	0		567.99	0	0	0	0	0		189.33	0		-1
TGTGGCAGTGAAAATGTTGAATGTGACAGCACCTACACCTCAGAGCAGTTACAAGCCTTCAAAAATGAAGTAGGAGTACTCAGGTGAGCTTGTGTGAATTACTCTTTTCCAGAGAAAGAAGTTATTTTTAT	VAVKMLNVTAPTPQSSYKPSKMK*EYSGELV*ITLFQRKKLFL	14	43	8	25	27	42		134.777	359.033	67.4189	244.695	238.125	378.795		187.077	287.205		0.65137
TGTGGCAGTGAAAATGTTGAAGCCTTCAAAAATGAAGTAGGAGTACTCAGGTGAGCTTGTGTGAATTACTCTTTTCCAGAGAAAGAAGTTATTTTTATTAGCTCCTGGTTCCCAGTGGACAGTGCAGGGGA	VAVKMLKPSKMK*EYSGELV*ITLFQRKKLFLLAPGSQWTVQG	12	36	17	26	33	64		115.523	300.586	143.265	254.483	291.041	577.211		186.458	374.245		0.498225
TGTGGCAGTGAAAATGTTGAATGTGACAGCACCTACACCTCAGTTACAAGCCTTCAAAAATGAAGTAGGAGTACTAAGGTGAGCTTGTGTGAATTACTCTTTTCCAGAGAAAGAAGTTATTTTTATTAGCT	VAVKMLNVTAPTPQLQAFKNEVGVLR*ACVNYSFPEKEVIFIS	20	29	14	5	0	17		192.539	242.139	117.983	48.939	0	153.322		184.22	67.4202		2.73242
TGTGGCAGTGAAAATGTTGAATGTGACAGCACCTACACCTCAGTTACAAGCCTTCAAAAATGAAGTAGGAGTACTCAGGTGAGCTTGTGTAAATTACTCTTTTCCAGAGAAAGAAGTTATTTTTATTAGCT	VAVKMLNVTAPTPQLQAFKNEVGVLR*ACVNYSFPEKEVIFIS	18	20	25	5	2	7		173.285	166.992	210.684	48.939	17.6389	63.1325		183.654	43.2368		4.24763
TGTGGCAGTGAAAATGTTGAATGTGACAGCACCTACGCAGTTACAAGCCTTCAAAAATGAAGTAGGAGTACTCAGGTGAGCTTGTGTGAATTACTCTTTTCCAGAGAAAGAAGTTATTTTTATTAGCTCCT	VAVKMLNVTAPTQLQAFKNEVGVLR*ACVNYSFPEKEVIFISS	5	45	15	10	13	34		48.1348	375.733	126.411	97.878	114.653	306.643		183.426	173.058		1.05991
TGTGGCAGTGAAAATGTTGAATGTGACAGCACCTACACCTCAGATACAAGCCTTCAAAAATGAAGTAGGAGTACTCAGGTGAGCTTGTGTGAATTACTCTTTTCCAGAGAAAGAAGTTATTTTTATTAGCT	VAVKMLNVTAPTPQIQAFKNEVGVLR*ACVNYSFPEKEVIFIS	22	32	8	3	1	14		211.793	267.188	67.4189	29.3634	8.81943	126.265		182.133	54.8159		3.32263
TGTGGCAGTGAAAATGTTGAATGTGACAGCACCTACACCTCAGTTACAAGCCTTCAAAAATGAAGTAGGAGTACTCAGGTGAGCTTGTGTGAATTACTCTTTCCAGAGAAAGAAGTTATTTTTATTAGCTC	VAVKMLNVTAPTPQLQAFKNEVGVLR*ACVNYSFQRKKLFLLA	34	18	8	2	3	7		327.316	150.293	67.4189	19.5756	26.4583	63.1325		181.676	36.3888		4.99264
TGTGGCAGTGAAAATGTTGAATGTGACAGCACATACACCTCAGTTACAAGCCTTCAAAAATGAAGTAGGAGTACTCAGGTGAGCTTGTGTGAATTACTCTTTTCCAGAGAAAGAAGTTATTTTTATTAGCT	VAVKMLNVTAHTPQLQAFKNEVGVLR*ACVNYSFPEKEVIFIS	17	31	14	4	3	13		163.658	258.838	117.983	39.1512	26.4583	117.246		180.16	60.9518		2.95577
TGTGGCAGTGAAAATGTTGAATGTGACAGCACCTACACCTCAGTTACAAGCCTTCAAAAATGAAGTAGGAGTACTCAGGTGAACTTGTGTGAATTACTCTTTTCCAGAGAAAGAAGTTATTTTTATTAGCT	VAVKMLNVTAPTPQLQAFKNEVGVLR*TCVNYSFPEKEVIFIS	20	22	19	3	2	18		192.539	183.692	160.12	29.3634	17.6389	162.341		178.784	69.781		2.56207
TGTGGCAGTGAAAATGTTGAATGTGACAGCACCTACACCTCAAAAGTTACAAGCCTTCAAAAATGAAGTAGGAGTACTCAGGTGAGCTTGTGTGAATTACTCTTTTCCAGAGAAAGAAGTTATTTTTATTA	VAVKMLNVTAPTPQKLQAFKNEVGVLR*ACVNYSFPEKEVIFI	26	13	21	24	13	18		250.301	108.545	176.975	234.907	114.653	162.341		178.607	170.633		1.04673
TGTGGCAGTGAAAATGTTGAATGTGACAGCACCTACACCTCAGTTACAAGCCTTCAAAAATGTAGTAGGAGTACTCAGGTGAGCTTGTGTGAATTACTCTTTTCCAGAGAAAGAAGTTATTTTTATTAGCT	VAVKMLNVTAPTPQLQAFKNVVGVLR*ACVNYSFPEKEVIFIS	26	23	11	4	1	7		250.301	192.041	92.7011	39.1512	8.81943	63.1325		178.348	37.0344		4.81574
TGTGGCAGTGAAAATGTTGAATGTGACAGCATTACAAGCCTTCAAAAATGAAGTAGGAGTACTCAGGTGAGCTTGTGTGAATTACTCTTTTCCAGAGAAAGAAGTTATTTTTATTAGCTCCTGGTTCCCAG	VAVKMLNVTALQAFKNEVGVLR*ACVNYSFPEKEVIFISSWFP	39	7	12	4	0	1		375.451	58.4473	101.128	39.1512	0	9.01892		178.342	16.0567		11.107
TGTGGCAGTAAAAATGTTGAATGTGACAGCACCTACACCTCAGTTACAAGCCTTCAAAAATGAAGTAGGAGTACTCAGGTGAGCTTGTGTGAATTACTCTTTTCCAGAGAAAGAAGTTATTTTTATTAGCT	VAVKMLNVTAPTPQLQAFKNEVGVLR*ACVNYSFPEKEVIFIS	25	21	14	7	5	10		240.674	175.342	117.983	68.5146	44.0972	90.1892		178	67.6003		2.63312
TGTGGCAGTGAAAATGTTGAATGTGACAGCACCTACACCTCAGTTACAAGCCTTCAAAAATGAATTAGGAGTACTCAGGTGAGCTTGTGTGAATTACTCTTTTCCAGAGAAAGAAGTTATTTTTATTAGCT	VAVKMLNVTAPTPQLQAFKNELGVLR*ACVNYSFPEKEVIFIS	17	16	27	12	1	14		163.658	133.594	227.539	117.454	8.81943	126.265		174.93	84.1793		2.07807
TGTGGCAGTGAAAATGTTGAATGTGACAGCACCTACAAAATGCCTTCAAAAATGAAGTAGGAGTACTCAGGTGAGCTTGTGTGAATTACTCTTTTCCAGAGAAAGAAGTTATTTTTATTAGCTCCTGGTTC	VAVKMLNVTAPTKCLQK*SRSTQVSLCELLFSRERSYFY*LLV	0	0	62	0	0	0		0	0	522.497	0	0	0		174.166	0		-1
TGTGGCAGTGAAAATGTTGAATGTGACAGCACCTACACCTCAGTTACAAGGCTTCAAAAATGAAGTAGGAGTACTCAGGTGAGCTTGTGTGAATTACTCTTTTCCAGAGAAAGAAGTTATTTTTATTAGCT	VAVKMLNVTAPTPQLQGFKNEVGVLR*ACVNYSFPEKEVIFIS	3	57	2	0	0	3		28.8809	475.928	16.8547	0	0	27.0568		173.888	9.01892		19.2803
TGTGGCAGTGAAAATGTTGAATGTGACAGCACCTACACCTCAGTAGTTACAAGCCTTCAAAAATGAAGTAGGAGTACTCAGGTGAGCTTGTGTGAATTACTCTTTTCCAGAGAAAGAAGTTATTTTTATTA	VAVKMLNVTAPTPQ*LQAFKNEVGVLR*ACVNYSFPEKEVIFI	13	18	29	35	47	68		125.15	150.293	244.394	342.573	414.513	613.287		173.279	456.791		0.37934
TGTGGCAGTGAAAATGTTGAATGTGACAGCACCTACGTTACAAGCCTTCAAAAATGAAGTAGGAGTACTCAGGTGAGCTTGTGTGAATTACTCTTTTCCAGAGAAAGAAGTTATTTTTATTAGCTCCTGGT	VAVKMLNVTAPTLQAFKNEVGVLR*ACVNYSFPEKEVIFISSW	13	28	19	8	13	40		125.15	233.789	160.12	78.3024	114.653	360.757		173.02	184.571		0.937418
TGTGGCATTGAAAATGTTGAATGTGACAGCACCTACACCTCAGTTACAAGCCTTCAAAAATGAAGTAGGAGTACTCAGGTGAGCTTGTGTGAATTACTCTTTTCCAGAGAAAGAAGTTATTTTTATTAGCT	VALKMLNVTAPTPQLQAFKNEVGVLR*ACVNYSFPEKEVIFIS	46	4	5	3	1	1		442.84	33.3985	42.1368	29.3634	8.81943	9.01892		172.792	15.7339		10.9821
TGTGGCAGTGAAAATGTTGAATGTGACAGCACCTACACCTCAGTTACAAGCCTTAAAAAATGAAGTAGGAGTACTCAGGTGAGCTTGTGTGAATTACTCTTTTCCAGAGAAAGAAGTTATTTTTATTAGCT	VAVKMLNVTAPTPQLQALKNEVGVLR*ACVNYSFPEKEVIFIS	19	25	15	9	2	11		182.912	208.74	126.411	88.0902	17.6389	99.2081		172.688	68.3124		2.52791
TGTGGCAGTGAAAATGTTGAATGTGACAGCACCTACACCTCATGAAGTAGAGTACTCAGTGAAGTAGTACTACTCATGAAGTAGGAGTACTCAGGTGAGCTTGTGTGAATTACTCTTTTCCAGAGAAAGAA	VAVKMLNVTAPTPHEVEYSVK*YYS*SRSTQVSLCELLFSRER	0	62	0	0	0	0		0	517.676	0	0	0	0		172.559	0		-1
TGTGGCAGGGAAAATGTTGAATGTGACAGCACCTACACCTCAGTTACAAGCCTTCAAAAATGAAGTAGGAGTACTCAGGTGAGCTTGTGTGAATTACTCTTTTCCAGAGAAAGAAGTTATTTTTATTAGCT	VAGKMLNVTAPTPQLQAFKNEVGVLR*ACVNYSFPEKEVIFIS	17	24	18	2	4	7		163.658	200.391	151.693	19.5756	35.2777	63.1325		171.914	39.3286		4.37122
TGTGGCAGTGAAAATGTTGAATGTGACAGCACCTACAAAGCCTTCAAAAATGAAGTAGGAGTACTCAGGTGAGCTTGTGTGAATTACTCTTTTCCAGAGAAAGAAGTTATTTTTATTAGCTCCTGGTTCCC	VAVKMLNVTAPTKPSKMK*EYSGELV*ITLFQRKKLFLLAPGS	36	3	17	17	13	27		346.57	25.0488	143.265	166.393	114.653	243.511		171.628	174.852		0.981562
TGTGGCAGTGAAAATGTTGAATGTGACAGCACCTACACCTCAGTTACAAGCCTTCAAAAATGAAGTAGGAGTACTGAGGTGAGCTTGTGTGAATTACTCTTTTCCAGAGAAAGAAGTTATTTTTATTAGCT	VAVKMLNVTAPTPQLQAFKNEVGVLR*ACVNYSFPEKEVIFIS	48	3	3	0	0	4		462.094	25.0488	25.2821	0	0	36.0757		170.808	12.0252		14.2042
TGTGGCAGTGAAAATGTTGAATGTGACAGCACCTACACCTCAGTTACAAGCCTTCAAAAATGAAGTAGGAGTACTCAGGTGAGCTTGTGTGAATTACTCTTTTCCAGAAAAAGAAGTTATTTTTATTAGCT	VAVKMLNVTAPTPQLQAFKNEVGVLR*ACVNYSFPEKEVIFIS	14	24	21	4	6	14		134.777	200.391	176.975	39.1512	52.9166	126.265		170.714	72.7776		2.3457
TGTGGCAGTGAAAATGTTGAATGTGACAGCACCTACACCTCAGTTACAATGAAGTAGGAGTACTCAGGTGAGCTTGTGTGAATTACTCTTTTCCAGAGAAAGAAGTTATTTTTATTAGCTCCTGGTTCCCA	VAVKMLNVTAPTPQLQ*SRSTQVSLCELLFSRERSYFY*LLVP	53	0	0	1	2	0		510.229	0	0	9.7878	17.6389	0		170.076	9.14222		18.6034
TGTGGCAGTGAAAATGTTGAATGTGACAGCACCTACACCTCAGTTACAAGCCTTCAAAAATGAAGTAGGAATACTCAGGTGAGCTTGTGTGAATTACTCTTTTCCAGAGAAAGAAGTTATTTTTATTAGCT	VAVKMLNVTAPTPQLQAFKNEVGILR*ACVNYSFPEKEVIFIS	19	24	15	2	8	7		182.912	200.391	126.411	19.5756	70.5554	63.1325		169.904	51.0878		3.32573
TGTGGCAGTGAAAATGTTGAATGTGACAGCACCTACACCTCAGTTACAAGCCTTCAAAAATGAAGTAGGAGTACACAGGTGAGCTTGTGTGAATTACTCTTTTCCAGAGAAAGAAGTTATTTTTATTAGCT	VAVKMLNVTAPTPQLQAFKNEVGVHR*ACVNYSFPEKEVIFIS	10	21	28	2	3	2		96.2696	175.342	235.966	19.5756	26.4583	18.0378		169.193	21.3572		7.92202
TGTGGCAGTGAAAATGTTGAATGTGACAGCACCTACACCTCAGTTACAAGCCTTCAAAAATGAAGTAGGAGTACTCAGGTGAGCTTGTGTGAATTACTCTTTTCCAGAGAAAAAAGTTATTTTTATTAGCT	VAVKMLNVTAPTPQLQAFKNEVGVLR*ACVNYSFPEKKVIFIS	23	19	15	6	4	12		221.42	158.643	126.411	58.7268	35.2777	108.227		168.824	67.4105		2.50442
TGTGGCAATGAAAATGTTGAATGTGACAGCACCTACACCTCAGTTACAAGCCTTCAAAAATGAAGTAGGAGTACTCAGGTGAGCTTGTGTGAATTACTCTTTTCCAGAGAAAGAAGTTATTTTTATTAGCT	VAMKMLNVTAPTPQLQAFKNEVGVLR*ACVNYSFPEKEVIFIS	17	17	23	4	7	11		163.658	141.943	193.829	39.1512	61.736	99.2081		166.477	66.6985		2.49597
TGTGGCAGTGAAAATGTTGAATGTGACAGCACCTACACCTCAGTACAGTTACAAGCCTTCAAAAATGAAGTAGGAGTACTCAGGTGAGCTTGTGTGAATTACTCTTTTCCAGAGAAAGAAGTTATTTTTAT	VAVKMLNVTAPTPQYSYKPSKMK*EYSGELV*ITLFQRKKLFL	30	11	14	18	24	43		288.809	91.8458	117.983	176.18	211.666	387.814		166.213	258.553		0.642856
TGTGGCAGTGAAAATGTTGAATGTGACAGCACCTACACCTCAGTTATAAGCCTTCAAAAATGAAGTAGGAGTACTCAGGTGAGCTTGTGTGAATTACTCTTTTCCAGAGAAAGAAGTTATTTTTATTAGCT	VAVKMLNVTAPTPQL*AFKNEVGVLR*ACVNYSFPEKEVIFIS	16	20	21	9	2	11		154.031	166.992	176.975	88.0902	17.6389	99.2081		165.999	68.3124		2.43
TGTGGCAGTGAAAATGTTGAATGTGACAGCACCTACACCTCAAAAATGAAGCCTTCAAAAATGAAGTAGGAGTACTCAGGTGAGCTTGTGTGAATTACTCTTTTCCAGAGAAAGAAGTTATTTTTATTAGC	VAVKMLNVTAPTPQK*SLQK*SRSTQVSLCELLFSRERSYFY*	29	5	21	13	14	35		279.182	41.7481	176.975	127.241	123.472	315.662		165.968	188.792		0.879106
TGTGGCAGTGAAAATGTTGAATGTGACAGCACCTACAACTCCAGTTACAAGCCTTCAAAAATGAAGTAGGAGTACTCAGGTGAGCTTGTGTGAATTACTCTTTTCCAGAGAAAGAAGTTATTTTTATTAGC	VAVKMLNVTAPTTPVTSLQK*SRSTQVSLCELLFSRERSYFY*	0	4	55	4	2	9		0	33.3985	463.505	39.1512	17.6389	81.1703		165.635	45.9868		3.60179
TGTGGCAGTGAAAATGTTGAATGTGACAGCACCTACACCTCAGTTACAAGCCTTCAAAAATGAAGTAGGAGTACTCAGGTGAGCTTGTATGAATTACTCTTTTCCAGAGAAAGAAGTTATTTTTATTAGCT	VAVKMLNVTAPTPQLQAFKNEVGVLR*ACMNYSFPEKEVIFIS	13	20	24	2	4	12		125.15	166.992	202.257	19.5756	35.2777	108.227		164.8	54.3601		3.03163
TGTGGCAGTGAAAATGTTGAATGTGACAGCACCTACACCTCAGTTACAAGCCTTCAAAAATGAAGTAGGAGTACTCAGGTGAGCTTGTGTGAATTACTCTTTTCCAGAGAAAGACGTTATTTTTATTAGCT	VAVKMLNVTAPTPQLQAFKNEVGVLR*ACVNYSFPEKDVIFIS	20	22	14	2	3	16		192.539	183.692	117.983	19.5756	26.4583	144.303		164.738	63.4455		2.59652
TGTGGCAGTGAAAATGTTGAATGTGACAGCACCTACACCTCAGTTACAAGCCTTCAAAAATGAAGTAGGAGTACTCAAGTGAGCTTGTGTGAATTACTCTTTTCCAGAGAAAGAAGTTATTTTTATTAGCT	VAVKMLNVTAPTPQLQAFKNEVGVLK*ACVNYSFPEKEVIFIS	19	18	19	3	6	13		182.912	150.293	160.12	29.3634	52.9166	117.246		164.442	66.5087		2.47249
TGTGGCAGTGAAAATGTTGAATGTGACAGCACCTACACCTCAGTTTACAAGCCTTCAAAAATGAAGTAGGAGTACTCAGGTGAGCTTGTGTGAATTACTCTTTTCCAGAGAAAGAAGTTATTTTTATTAGC	VAVKMLNVTAPTPQFTSLQK*SRSTQVSLCELLFSRERSYFY*	26	21	8	33	29	74		250.301	175.342	67.4189	322.997	255.763	667.4		164.354	415.387		0.395664
TGTGGCAGTGAAAATGTTGAATGTGACAGCACCTACACCTCAGGAAACACTTTTCCAGAGAAAGAAGTTATTTTTATTAGCTCCTGGTTCCCAGTGGACAGTGCAGGGGAAAGAATAGTAGAAGATCGGAA	VAVKMLNVTAPTPQETLFQRKKLFLLAPGSQWTVQGKE**KIG	51	0	0	0	0	0		490.975	0	0	0	0	0		163.658	0		-1
TGTGGCAGTGAAAATGTTGAATGTGACAGCACCTACACCTCAGCTTACAAGCCTTCAAAAATGAAGTAGGAGTACTCAGGTGAGCTTGTGTGAATTACTCTTTTCCAGAGAAAGAAGTTATTTTTATTAGC	VAVKMLNVTAPTPQLTSLQK*SRSTQVSLCELLFSRERSYFY*	29	18	7	22	17	40		279.182	150.293	58.9916	215.332	149.93	360.757		162.822	242.006		0.672801
TGTGGCAGTGAAAATGTTGAATGTGACAGCACCTACACCTCAGTTACAAGCCTTCAAAAATGAAGTAGGAGTACTCAGGTGAGCTTGTGTGAATTACTCTTTTCCAGAGAAAGAAATTATTTTTATTAGCT	VAVKMLNVTAPTPQLQAFKNEVGVLR*ACVNYSFPEKEIIFIS	28	14	12	3	4	5		269.555	116.895	101.128	29.3634	35.2777	45.0946		162.526	36.5786		4.4432
TGTGGCAGTGAAAATGTTGAATGTGACAGCACCTACACCTACACCTTCAAAAATGAAGTAGGAGTACTCAGGTGAGCTTGTGTGAATTACTCTTTTCCAGAGAAAGAAGTTATTTTTATTAGCTCCTGGTT	VAVKMLNVTAPTPTPSKMK*EYSGELV*ITLFQRKKLFLLAPG	41	11	0	4	7	5		394.705	91.8458	0	39.1512	61.736	45.0946		162.184	48.6606		3.33296
TGTGGCAGTGAAAATGTTGAATGTGACAGCACCTACACCTCAGTTACAAGCCTTCAAAAATGAAGTAGGAGTACTCAGGTGTGCTTGTGTGAATTACTCTTTTCCAGAGAAAGAAGTTATTTTTATTAGCT	VAVKMLNVTAPTPQLQAFKNEVGVLRCACVNYSFPEKEVIFIS	18	21	16	8	5	11		173.285	175.342	134.838	78.3024	44.0972	99.2081		161.155	73.8692		2.18163
TGTGGCAGTGAAAATGTTGAATGTGACAGCACCTACACCTCAGCAGCCTTCAAAAATGAAGTAGGAGTACTCAGGTGAGCTTGTGTGAATTACTCTTTTCCAGAGAAAGAAGTTATTTTTATTAGCTCCTG	VAVKMLNVTAPTPQQPSKMK*EYSGELV*ITLFQRKKLFLLAP	21	7	26	23	29	46		202.166	58.4473	219.112	225.119	255.763	414.87		159.908	298.584		0.535555
TGTGGCAGTGAAAATGTTGAATGTGACAGCACCTACACCTCAGTTACAAGCCTTCAAAAATGAAGTAGGAGTACTCAGTTGAGCTTGTGTGAATTACTCTTTTCCAGAGAAAGAAGTTATTTTTATTAGCT	VAVKMLNVTAPTPQLQAFKNEVGVLS*ACVNYSFPEKEVIFIS	14	19	22	6	5	4		134.777	158.643	185.402	58.7268	44.0972	36.0757		159.607	46.2999		3.44725
TGTGGCAGTGAAAATGTTGAATGTGACAGCACCTACACTCAGTTACAAGCCTTCAAAAATGAAGTAGGAGTACTCAGGTGAGCTTGTGTGAATTACTCTTTTCCAGAGAAAGAAGTTATTTTTATTAGCTC	VAVKMLNVTAPTLSYKPSKMK*EYSGELV*ITLFQRKKLFLLA	41	8	2	12	13	22		394.705	66.7969	16.8547	117.454	114.653	198.416		159.452	143.507		1.11111
TGTGGCAGTGAAAATGTTGAATGTGACAGCACCGTTACAAGCCTTCAAAAATGAAGTAGGAGTACTCAGGTGAGCTTGTGTGAATTACTCTTTTCCAGAGAAAGAAGTTATTTTTATTAGCTCCTGGTTCC	VAVKMLNVTAPLQAFKNEVGVLR*ACVNYSFPEKEVIFISSWF	25	12	16	4	3	20		240.674	100.195	134.838	39.1512	26.4583	180.378		158.569	81.996		1.93386
TGTGGCAGTGAAAATGTTGAATGTGTCAGCACCTACACCTCAGTTACAAGCCTTCAAAAATGAAGTAGGAGTACTCAGGTGAGCTTGTGTGAATTACTCTTTTCCAGAGAAAGAAGTTATTTTTATTAGCT	VAVKMLNVSAPTPQLQAFKNEVGVLR*ACVNYSFPEKEVIFIS	21	17	15	5	4	7		202.166	141.943	126.411	48.939	35.2777	63.1325		156.84	49.1164		3.19323
TGTGGCAGTGAAAATGTTGAATGTGACAGCACCTACACCTCGCAGTTACAAGCCTTCAAAAATGAAGTAGGAGTACTCAGGTGAGCTTGTGTGAATTACTCTTTTCCAGAGAAAGAAGTTATTTTTATTAG	VAVKMLNVTAPTPRSYKPSKMK*EYSGELV*ITLFQRKKLFLL	21	18	14	29	27	54		202.166	150.293	117.983	283.846	238.125	487.022		156.814	336.331		0.466249
TGTGGCAGTGAAAATGTTGAATGTGAAAGCACCTACACCTCAGTTACAAGCCTTCAAAAATGAAGTAGGAGTACTCAGGTGAGCTTGTGTGAATTACTCTTTTCCAGAGAAAGAAGTTATTTTTATTAGCT	VAVKMLNVKAPTPQLQAFKNEVGVLR*ACVNYSFPEKEVIFIS	14	21	19	4	2	8		134.777	175.342	160.12	39.1512	17.6389	72.1514		156.746	42.9805		3.64692
TGTGGCAGTGAAAAAGTTACAAGCCTTCAAAAATGAAGTAGGAGTACTCAGGTGAGCTTGTGTGAATTACTCTTTTCCAGAGAAAGAAGTTATTTTTATTAGCTCCTGGTTCCCAGTGGACAGTGCAGGGG	VAVKKLQAFKNEVGVLR*ACVNYSFPEKEVIFISSWFPVDSAG	0	55	1	2	2	5		0	459.229	8.42737	19.5756	17.6389	45.0946		155.885	27.4364		5.68171
TGTGGCAGTGAAAATGTTGAATGTGACAGCACCTACACCTCATTACAAGCCTTCAAAAATGAAGTAGGAGTACTCAGGTGAGCTTGTGTGAATTACTCTTTTCCAGAGAAAGAAGTTATTTTTATTAGCTC	VAVKMLNVTAPTPHYKPSKMK*EYSGELV*ITLFQRKKLFLLA	5	29	21	10	5	23		48.1348	242.139	176.975	97.878	44.0972	207.435		155.749	116.47		1.33725
TGTGGCAGTGAAAATGTTGAATGTGACAGCACCTACACACAAGCCTTCAAAAATGAAGTAGGAGTACTCAGGTGAGCTTGTGTGAATTACTCTTTTCCAGAGAAAGAAGTTATTTTTATTAGCTCCTGGTT	VAVKMLNVTAPTHKPSKMK*EYSGELV*ITLFQRKKLFLLAPG	12	29	13	13	26	31		115.523	242.139	109.556	127.241	229.305	279.587		155.739	212.044		0.734466
TGTGGCAGTGAAAATGATGAATGTGACAGCACCTACACCTCAGTTACAAGCCTTCAAAAATGAAGTAGGAGTACTCAGGTGAGCTTGTGTGAATTACTCTTTTCCAGAGAAAGAAGTTATTTTTATTAGCT	VAVKMMNVTAPTPQLQAFKNEVGVLR*ACVNYSFPEKEVIFIS	9	19	26	2	4	7		86.6426	158.643	219.112	19.5756	35.2777	63.1325		154.799	39.3286		3.93604
TGTGGCAGTGAAAATGTTGAATGTGACAGCACCTACACTACAAGCCTTCAAAAATGAAGTAGGAGTACTCAGGTGAGCTTGTGTGAATTACTCTTTTCCAGAGAAAGAAGTTATTTTTATTAGCTCCTGGT	VAVKMLNVTAPTLQAFKNEVGVLR*ACVNYSFPEKEVIFISSW	9	24	21	12	6	27		86.6426	200.391	176.975	117.454	52.9166	243.511		154.669	137.96		1.12111
TGTGGCAGTGAAAATGTTGAATGTGACAGCAACTACACCTCAGTTACAAGCCTTCAAAAATGAAGTAGGAGTACTCAGGTGAGCTTGTGTGAATTACTCTTTTCCAGAGAAAGAAGTTATTTTTATTAGCT	VAVKMLNVTATTPQLQAFKNEVGVLR*ACVNYSFPEKEVIFIS	15	16	22	3	1	13		144.404	133.594	185.402	29.3634	8.81943	117.246		154.467	51.8096		2.98143
TGTGGCAGTGAAAATGTTGAATGTGACAGCACCTAAACCTCAGTTACAAGCCTTCAAAAATGAAGTAGGAGTACTCAGGTGAGCTTGTGTGAATTACTCTTTTCCAGAGAAAGAAGTTATTTTTATTAGCT	VAVKMLNVTAPKPQLQAFKNEVGVLR*ACVNYSFPEKEVIFIS	14	23	16	3	1	10		134.777	192.041	134.838	29.3634	8.81943	90.1892		153.885	42.7907		3.59624
TGTGGCAGTGAAAATGTTGAATGTGACAGCACCTACACATTTACAAGCCTTCAAAAATGAAGTAGGAGTACTCAGGTGAGCTTGTGTGAATTACTCTTTTCCAGAGAAAGAAGTTATTTTTATTAGCTCCT	VAVKMLNVTAPTHLQAFKNEVGVLR*ACVNYSFPEKEVIFISS	6	13	35	0	3	10		57.7617	108.545	294.958	0	26.4583	90.1892		153.755	38.8825		3.95435
TGTGGCAGTGAAAATGTTGAATGTGACAGCACCTACACCTCAGTTACAAGCCTTCAAAAATGAAGTAGGAGTACTCAGGTGAGCTTGTGTGAATTACTCTTTTCCAGTGAAAGAAGTTATTTTTATTAGCT	VAVKMLNVTAPTPQLQAFKNEVGVLR*ACVNYSFPVKEVIFIS	17	16	19	5	1	8		163.658	133.594	160.12	48.939	8.81943	72.1514		152.457	43.3033		3.52069
TGTGGCAGTGAAAATGTTGAATGTGACAGCACCTACACCTCAGTTACAAGCCTTCAAAAATGAAGTAGGAGTACTCAGGTGCGCTTGTGTGAATTACTCTTTTCCAGAGAAAGAAGTTATTTTTATTAGCT	VAVKMLNVTAPTPQLQAFKNEVGVLRCACVNYSFPEKEVIFIS	20	19	12	8	5	8		192.539	158.643	101.128	78.3024	44.0972	72.1514		150.77	64.8503		2.32489
TGTGGCAGTGAAAATGTTGAATGAGACAGCACCTACACCTCAGTTACAAGCCTTCAAAAATGAAGTAGGAGTACTCAGGTGAGCTTGTGTGAATTACTCTTTTCCAGAGAAAGAAGTTATTTTTATTAGCT	VAVKMLNETAPTPQLQAFKNEVGVLR*ACVNYSFPEKEVIFIS	13	21	18	5	6	11		125.15	175.342	151.693	48.939	52.9166	99.2081		150.728	67.0212		2.24896
TGTGGCAGTGAAAATGTTGAATGTGACAGCACCTACACCTCAGTTACAAGCCTTCAAAAATGAAGTAGGAGTACTCAGGTGAGCTTGTGTGAATTACTCTTTTCCAGAGAAAGTAGTTATTTTTATTAGCT	VAVKMLNVTAPTPQLQAFKNEVGVLR*ACVNYSFPEKVVIFIS	16	14	21	1	6	5		154.031	116.895	176.975	9.7878	52.9166	45.0946		149.3	35.933		4.15496
TGTGGCAGTGAAAATGTTGAATGTGACAGCACCTACACCTCAAGCCTTCAAAATGAAGTAGGAGTACTCAGGTGAGCTTGTGTGAATTACTCTTTTCCAGAGAAAGAAGTTATTTTTATTAGCTCCTGGTT	VAVKMLNVTAPTPQAFKMK*EYSGELV*ITLFQRKKLFLLAPG	23	14	13	7	18	27		221.42	116.895	109.556	68.5146	158.75	243.511		149.29	156.925		0.951346
TGTGGCAGTGAAAATGTTGAATGTGACAGCACCTACACCTCAGTTACAAGCCTTCAAAAATGAAGTAGGAGTACTCAGGTGAGCTTATGTGAATTACTCTTTTCCAGAGAAAGAAGTTATTTTTATTAGCT	VAVKMLNVTAPTPQLQAFKNEVGVLR*AYVNYSFPEKEVIFIS	16	20	15	10	8	13		154.031	166.992	126.411	97.878	70.5554	117.246		149.145	95.2265		1.56621
TGTGGCAGTGAAAATGTTGAATGTGACAGCACCTACACCTCAGCACTTACAAGCCTTCAAAAATGAAGTAGGAGTACTCAGGTGAGCTTGTGTGAATTACTCTTTTCCAGAGAAAGAAGTTATTTTTATTA	VAVKMLNVTAPTPQHLQAFKNEVGVLR*ACVNYSFPEKEVIFI	0	5	48	6	1	5		0	41.7481	404.514	58.7268	8.81943	45.0946		148.754	37.5469		3.96181
TGTGGCAGTGAAAATGTTGAATGTGACGCAGTTACAAGCCTTCAAAAATGAAGTAGGAGTACTCAGGTGAGCTTGTGTGAATTACTCTTTTCCAGAGAAAGAAGTTATTTTTATTAGCTCCTGGTTCCCAG	VAVKMLNVTQLQAFKNEVGVLR*ACVNYSFPEKEVIFISSWFP	0	6	47	0	1	0		0	50.0977	396.086	0	8.81943	0		148.728	2.93981		50.591
TGTGGCAGTGAAAATGTTGAATGTGACAGCACCTACACCTCAGGTGTAGTTACAAGCCTTCAAAAATGAAGTAGGAGTACTCAGGTGAGCTTGTGTGAATTACTCTTTTCCAGAGAAAGAAGTTATTTTTA	VAVKMLNVTAPTPQV*LQAFKNEVGVLR*ACVNYSFPEKEVIF	13	32	6	20	12	58		125.15	267.188	50.5642	195.756	105.833	523.097		147.634	274.896		0.537055
TGTGGCAGTGAAAATGTTGAATGTGACAGCACCTACACCACAAGCCTTCAAAAATGAAGTAGGAGTACTCAGGTGAGCTTGTGTGAATTACTCTTTTCCAGAGAAAGAAGTTATTTTTATTAGCTCCTGGT	VAVKMLNVTAPTPQAFKNEVGVLR*ACVNYSFPEKEVIFISSW	12	18	21	26	24	37		115.523	150.293	176.975	254.483	211.666	333.7		147.597	266.616		0.553593
TGTGGCAGTGAAAATGTTGAATGTGACAGCACCTAAGCCTTCAAAAATGAAGTAGGAGTACTCAGGTGAGCTTGTGTGAATTACTCTTTTCCAGAGAAAGAAGTTATTTTTATTAGCTCCTGGTTCCCAGT	VAVKMLNVTAPKPSKMK*EYSGELV*ITLFQRKKLFLLAPGSQ	18	16	16	33	45	76		173.285	133.594	134.838	322.997	396.874	685.438		147.239	468.437		0.31432
TGTGGCAGTGAAAATGTTGAATGTGACAGCACCTAATGAAGTAGGAGTACTCAGGTGAGCTTGTGTGAATTACTCTTTTCCAGAGAAAGAAGTTATTTTTATTAGCTCCTGGTTCCCAGTGGACAGTGCAG	VAVKMLNVTAPNEVGVLR*ACVNYSFPEKEVIFISSWFPVDSA	3	12	37	10	3	17		28.8809	100.195	311.813	97.878	26.4583	153.322		146.963	92.5527		1.58788
TGTGGCAGTGAAAATGTTGAATGTGACAGCACCTACACCTCAGGTTTTGAAGGTTACAAGCCTTCAAAAATGAAGTAGGAGTACTCAGGTGAGCTTGTGTGAATTACTCTTTTCCAGAGAAAGAAGTTATT	VAVKMLNVTAPTPQVLKVTSLQK*SRSTQVSLCELLFSRERSY	1	12	39	0	0	0		9.62696	100.195	328.667	0	0	0		146.163	0		-1
TGTGGCAGTGAAAATGTTGAATGTGACAGCACCTACACCTCAGTTACAAGCCTTCAAAAATGAAGTAGGAGTACTCAGGTGAGCTTGAGTGAATTACTCTTTTCCAGAGAAAGAAGTTATTTTTATTAGCT	VAVKMLNVTAPTPQLQAFKNEVGVLR*A*VNYSFPEKEVIFIS	15	19	16	5	2	10		144.404	158.643	134.838	48.939	17.6389	90.1892		145.962	52.2557		2.79322
TGTGGCAGTGAAAATGTTGAATGTGACAGCACCTACACCTCAGTTACAAGCCTTCAAAAATGACGTAGGAGTACTCAGGTGAGCTTGTGTGAATTACTCTTTTCCAGAGAAAGAAGTTATTTTTATTAGCT	VAVKMLNVTAPTPQLQAFKNDVGVLR*ACVNYSFPEKEVIFIS	12	16	22	5	3	11		115.523	133.594	185.402	48.939	26.4583	99.2081		144.84	58.2018		2.48858
TGTGGCAGAGAAAATGTTGAATGTGACAGCACCTACACCTCAGTTACAAGCCTTCAAAAATGAAGTAGGAGTACTCAGGTGAGCTTGTGTGAATTACTCTTTTCCAGAGAAAGAAGTTATTTTTATTAGCT	VAEKMLNVTAPTPQLQAFKNEVGVLR*ACVNYSFPEKEVIFIS	19	19	11	8	1	4		182.912	158.643	92.7011	78.3024	8.81943	36.0757		144.752	41.0658		3.52488
TGTTACAAGCCTTCAAAAATGAAGTAGGAGTACTCAGGTGAGCTTGTGTGAATTACTCTTTTCCAGAGAAAGAAGTTATTTTTATTAGCTCCTGGTTCCCAGTGGACAGTGCAGGGGAAAGAATAGTAGAA	VTSLQK*SRSTQVSLCELLFSRERSYFY*LLVPSGQCRGKNSR	26	19	3	18	17	36		250.301	158.643	25.2821	176.18	149.93	324.681		144.742	216.931		0.667227
TGTGGCAGATTAGCTCCTGGTTCCCAGTGGACAGTGCAGGGGAAAGAATAGTAGAAGATCGGAAGAGCACACGTCTGAACTCCAGTCACAACTTGGCATCTCGTATGCCGTCTTCTGCTTGAAAAAAAAAA	VAD*LLVPSGQCRGKNSRRSEEHTSELQSQLGISYAVFCLKKK	0	52	0	0	0	0		0	434.18	0	0	0	0		144.727	0		-1
TGTGGCAGTGAAAATGTTGAATGTGACAGCACCTACACCTCATTTTGTCATTTTGACATTTGACATTTTGTCATTTTGACAAGCCTTCAAAAATGAAGTAGGAGTACTCAGGTGAGCTTGTGTGAATTACT	VAVKMLNVTAPTPHFVILTFDILSF*QAFKNEVGVLR*ACVNY	45	0	0	0	0	0		433.213	0	0	0	0	0		144.404	0		-1
TGTGGCAGTGAAAATGTTGAATGTGACAGCACCTACACATCAGTTACAAGCCTTCAAAAATGAAGTAGGAGTACTCAGGTGAGCTTGTGTGAATTACTCTTTTCCAGAGAAAGAAGTTATTTTTATTAGCT	VAVKMLNVTAPTHQLQAFKNEVGVLR*ACVNYSFPEKEVIFIS	18	18	13	5	3	6		173.285	150.293	109.556	48.939	26.4583	54.1135		144.378	43.1703		3.34439
TGTGGCAGTGAAATGTTGAATGTGACAGCACCTACACCTCAGTTACAAGCCTTCAAAAATGAAGTAGGAGTACTCAGGTGAGCTTGTGTGAATTACTCTTTTCCAGAGAAAGAAGTTATTTTTATTAGCTC	VAVKC*M*QHLHLSYKPSKMK*EYSGELV*ITLFQRKKLFLLA	7	21	22	2	1	12		67.3887	175.342	185.402	19.5756	8.81943	108.227		142.711	45.5407		3.1337
TGTGGCAGTGAAAATGTTGAATGTGACAGCACCTACACCTCAGTTACAAGCCTTCAAAAATGAAGTAGGAGAACTCAGGTGAGCTTGTGTGAATTACTCTTTTCCAGAGAAAGAAGTTATTTTTATTAGCT	VAVKMLNVTAPTPQLQAFKNEVGELR*ACVNYSFPEKEVIFIS	6	25	19	3	4	7		57.7617	208.74	160.12	29.3634	35.2777	63.1325		142.207	42.5912		3.33889
TGTGGCAGTGAAAATGTTGAATGTGACAGCACCTACACCTCAGTTACAAGTTACAAGCCTTCAAAAATGAAGTAGGAGTACTCAGGTGAGCTTGTGTGAATTACTCTTTTCCAGAGAAAGAAGTTATTTTT	VAVKMLNVTAPTPQLQVTSLQK*SRSTQVSLCELLFSRERSYF	30	8	8	13	12	31		288.809	66.7969	67.4189	127.241	105.833	279.587		141.008	170.887		0.825154
TGTGGCAGTGAAAATGTTGAATGTGACAGCACCTACACCTCAGGTGTACAAGCCTTCAAAAATGAAGTAGGAGTACTCAGGTGAGCTTGTGTGAATTACTCTTTTCCAGAGAAAGAAGTTATTTTTATTAG	VAVKMLNVTAPTPQVYKPSKMK*EYSGELV*ITLFQRKKLFLL	14	9	25	27	17	64		134.777	75.1465	210.684	264.271	149.93	577.211		140.203	330.471		0.424252
TGTGGCAGTGAAAATGTTGAATGTGACAGCACCTACATGAAGTAGGAGTACTCAGGTGAGCTTGTGTGAATTACTCTTTTCCAGAGAAAGAAGTTATTTTTATTAGCTCCTGGTTCCCAGTGGACAGTGCA	VAVKMLNVTAPT*SRSTQVSLCELLFSRERSYFY*LLVPSGQC	14	31	3	3	4	9		134.777	258.838	25.2821	29.3634	35.2777	81.1703		139.633	48.6038		2.87287
TGTGGCAGTGAAAATGTTGAATGTGACAGCACCTACACCTCAGTTACAAGCCTTCAAAAATGAAGTATGAGTACTCAGGTGAGCTTGTGTGAATTACTCTTTTCCAGAGAAAGAAGTTATTTTTATTAGCT	VAVKMLNVTAPTPQLQAFKNEV*VLR*ACVNYSFPEKEVIFIS	13	17	18	3	1	3		125.15	141.943	151.693	29.3634	8.81943	27.0568		139.596	21.7465		6.41921
TGTGGCAGTGAAAATGTTGAATGTGACAGCACCTACAAGTTACAAGCCTTCAAAAATGAAGTAGGAGTACTCAGGTGAGCTTGTGTGAATTACTCTTTTCCAGAGAAAGAAGTTATTTTTATTAGCTCCTG	VAVKMLNVTAPTSYKPSKMK*EYSGELV*ITLFQRKKLFLLAP	13	23	12	38	24	62		125.15	192.041	101.128	371.936	211.666	559.173		139.44	380.925		0.366056
TGTGGCAGTGAAAATGTTGAATGTGACAGCACCTACACCTCAGTTACAAGCCTTCAAAAATGAAGTAGGAGTACTCAGGTGAGCTTGTGTGAATTACTCTTTTCCAGAGAAAGCAGTTATTTTTATTAGCT	VAVKMLNVTAPTPQLQAFKNEVGVLR*ACVNYSFPEKAVIFIS	12	20	16	4	2	13		115.523	166.992	134.838	39.1512	17.6389	117.246		139.118	58.012		2.39809
TGGGGCAGTGAAAATGTTGAATGTGACAGCACCTACACCTCAGTTACAAGCCTTCAAAAATGAAGTAGGAGTACTCAGGTGAGCTTGTGTGAATTACTCTTTTCCAGAGAAAGAAGTTATTTTTATTAGCT	GAVKMLNVTAPTPQLQAFKNEVGVLR*ACVNYSFPEKEVIFIS	12	23	13	2	3	3		115.523	192.041	109.556	19.5756	26.4583	27.0568		139.04	24.3636		5.70689
TGTGGCAGTGAAAATGTTGAATGTGACAGCACCTACACCTTCAAAAAAGTTACAAGCCTTCAAAAATGAAGTAGGAGTACTCAGGTGAGCTTGTGTGAATTACTCTTTTCCAGAGAAAGAAGTTATTTTTA	VAVKMLNVTAPTPSKKLQAFKNEVGVLR*ACVNYSFPEKEVIF	38	0	6	0	0	1		365.824	0	50.5642	0	0	9.01892		138.796	3.00631		46.1683
TGTGGCAGTGAAAATATTGAATGTGACAGCACCTACACCTCAGTTACAAGCCTTCAAAAATGAAGTAGGAGTACTCAGGTGAGCTTGTGTGAATTACTCTTTTCCAGAGAAAGAAGTTATTTTTATTAGCT	VAVKILNVTAPTPQLQAFKNEVGVLR*ACVNYSFPEKEVIFIS	11	24	13	4	7	9		105.897	200.391	109.556	39.1512	61.736	81.1703		138.614	60.6858		2.28413
TGTGGCAGTGAAAATGTTGAATGTGACAGCACCTACAAAGTTACAAGCCTTCAAAAATGAAGTAGGAGTACTCAGGTGAGCTTGTGTGAATTACTCTTTTCCAGAGAAAGAAGTTATTTTTATTAGCTCCT	VAVKMLNVTAPTKLQAFKNEVGVLR*ACVNYSFPEKEVIFISS	10	11	27	12	6	13		96.2696	91.8458	227.539	117.454	52.9166	117.246		138.551	95.8721		1.44517
TGTGGCAGTGAAAATGTTGAATGTGACAGCACCTACACCTGTTACAAGCCTTCAAAAATGAAGTAGGAGTACTCAGGTGAGCTTGTGTGAATTACTCTTTTCCAGAGAAAGAAGTTATTTTTATTAGCTCC	VAVKMLNVTAPTPVTSLQK*SRSTQVSLCELLFSRERSYFY*L	3	26	20	17	34	54		28.8809	217.09	168.547	166.393	299.861	487.022		138.173	317.758		0.434836
TGTGGCAGTGAAAAGCTTGCAGTTACAAGCCTTCAAAAATGAAGTAGGAGTACTCAGGTGAGCTTGTGTGAATTACTCTTTTCCAGAGAAAGAAGTTATTTTTATTAGCTCCTGGTTCCCAGTGGACAGTG	VAVKSLQLQAFKNEVGVLR*ACVNYSFPEKEVIFISSWFPVDS	43	0	0	0	0	0		413.959	0	0	0	0	0		137.986	0		-1
TGTGGCAGTGAAAATGTTGAATGTGACAGCAAACAGTTACAAGCCTTCAAAAATGAAGTAGGAGTACTCAGGTGAGCTTGTGTGAATTACTCTTTTCCAGAGAAAGAAGTTATTTTTATTAGCTCCTGGTT	VAVKMLNVTANSYKPSKMK*EYSGELV*ITLFQRKKLFLLAPG	0	0	49	0	0	0		0	0	412.941	0	0	0		137.647	0		-1
TGTGGCAGTGAAAATGTTGAACAGTTACAAGCCTTCAAAAATGAAGTAGGAGTACTCAGGTGAGCTTGTGTGAATTACTCTTTTCCAGAGAAAGAAGTTATTTTTATTAGCTCCTGGTTCCCAGTGGACAG	VAVKMLNSYKPSKMK*EYSGELV*ITLFQRKKLFLLAPGSQWT	35	5	4	1	1	7		336.943	41.7481	33.7095	9.7878	8.81943	63.1325		137.467	27.2466		5.0453
TGTGGCAGTGAAAATGTTGAATGTGACAGCACCTACACCTCAGTTGTTACAAGCCTTCAAAAATGAAGTAGGAGTACTCAGGTGAGCTTGTGTGAATTACTCTTTTCCAGAGAAAGAAGTTATTTTTATTA	VAVKMLNVTAPTPQLLQAFKNEVGVLR*ACVNYSFPEKEVIFI	21	12	13	10	10	29		202.166	100.195	109.556	97.878	88.1943	261.549		137.306	149.207		0.920237
TGTGGCAGTGAAAATGTTGAATGTGACAGCACCTACACCTCAGTTACAAGCCTTCAAAAATGAAGTAGGAGTACTCAGGTGAGCTTGTGTGAATTACTCTTTTCCTGAGAAAGAAGTTATTTTTATTAGCT	VAVKMLNVTAPTPQLQAFKNEVGVLR*ACVNYSFPEKEVIFIS	21	17	8	6	8	6		202.166	141.943	67.4189	58.7268	70.5554	54.1135		137.176	61.1319		2.24394
TGTGGCAGTGAAAATGTTGAATGAAGTAGGAGTACTCAGGTGAGCTTGTGTGAATTACTCTTTTCCAGAGAAAGAAGTTATTTTTATTAGCTCCTGGTTCCCAGTGGACAGTGCAGGGGAAAGAATAGTAG	VAVKMLNEVGVLR*ACVNYSFPEKEVIFISSWFPVDSAGERIV	4	23	21	15	32	57		38.5078	192.041	176.975	146.817	282.222	514.079		135.841	314.372		0.432103
TGTGGCGGTGAAAATGTTGAATGTGACAGCACCTACACCTCAGTTACAAGCCTTCAAAAATGAAGTAGGAGTACTCAGGTGAGCTTGTGTGAATTACTCTTTTCCAGAGAAAGAAGTTATTTTTATTAGCT	VAVKMLNVTAPTPQLQAFKNEVGVLR*ACVNYSFPEKEVIFIS	17	12	17	3	5	11		163.658	100.195	143.265	29.3634	44.0972	99.2081		135.706	57.5562		2.3578
TGTGGCAGTGAAAATGTTGAATGTGACAGCACCTACACCTCAGTTACAAGCCTTCAAAAATGAAGTAGGAGTACTCAGGTGAGCTTGTGTGAATTACTCTTTTCCAGAGACAGAAGTTATTTTTATTAGCT	VAVKMLNVTAPTPQLQAFKNEVGVLR*ACVNYSFPETEVIFIS	16	15	15	3	5	9		154.031	125.244	126.411	29.3634	44.0972	81.1703		135.229	51.5436		2.62358
TGTGGCAGTGAAAATGTACAAGCCTTCAAAAATGAAGTAGGAGTACTCAGGTGAGCTTGTGTGAATTACTCTTTTCCAGAGAAAGAAGTTATTTTTATTAGCTCCTGGTTCCCAGTGGACAGTGCAGGGGA	VAVKMYKPSKMK*EYSGELV*ITLFQRKKLFLLAPGSQWTVQG	7	7	33	6	8	2		67.3887	58.4473	278.103	58.7268	70.5554	18.0378		134.646	49.1067		2.74191
TGTGGCAGTGTAAATGTTGAATGTGACAGCACCTACACCTCAGTTACAAGCCTTCAAAAATGAAGTAGGAGTACTCAGGTGAGCTTGTGTGAATTACTCTTTTCCAGAGAAAGAAGTTATTTTTATTAGCT	VAV*MLNVTAPTPQLQAFKNEVGVLR*ACVNYSFPEKEVIFIS	10	17	19	3	8	7		96.2696	141.943	160.12	29.3634	70.5554	63.1325		132.778	54.3504		2.44299
TGTGGCAGTGAAAATGTTGAATGTGACAGCACCAAGCCTTCAAAAATGAAGTAGGAGTACTCAGGTGAGCTTGTGTGAATTACTCTTTTCCAGAGAAAGAAGTTATTTTTATTAGCTCCTGGTTCCCAGTG	VAVKMLNVTAPSLQK*SRSTQVSLCELLFSRERSYFY*LLVPS	4	35	8	25	18	48		38.5078	292.237	67.4189	244.695	158.75	432.908		132.721	278.784		0.476071
TGTGGCTGTGAAAATGTTGAATGTGACAGCACCTACACCTCAGTTACAAGCCTTCAAAAATGAAGTAGGAGTACTCAGGTGAGCTTGTGTGAATTACTCTTTTCCAGAGAAAGAAGTTATTTTTATTAGCT	VAVKMLNVTAPTPQLQAFKNEVGVLR*ACVNYSFPEKEVIFIS	16	11	18	2	0	8		154.031	91.8458	151.693	19.5756	0	72.1514		132.523	30.5757		4.33427
TGTGGCAGTGAAAATGTTGAATGTGACAGCACCTACACAGTTACAAGCCTTCAAAAATGGAGTAGGAGTACTCAGGTGAGCTTGTGTGAATTACTCTTTTCCAGAGAAAGAAGTTATTTTTATTAGCTCCT	VAVKMLNVTAPTQLQAFKNGVGVLR*ACVNYSFPEKEVIFISS	12	17	16	0	2	8		115.523	141.943	134.838	0	17.6389	72.1514		130.768	29.9301		4.36913
TGTGGCAGTGAAAATGTTGAATGTGACAGCACCTACACCTCAGTTACAAGCCTTCAAAAATGAAGTAGGAGTACTCAGGTGAGCTTGGGTGAATTACTCTTTTCCAGAGAAAGAAGTTATTTTTATTAGCT	VAVKMLNVTAPTPQLQAFKNEVGVLR*AWVNYSFPEKEVIFIS	18	16	10	5	1	6		173.285	133.594	84.2737	48.939	8.81943	54.1135		130.384	37.2907		3.49643
TGTGGCAGTGAAAATGTTGAATGTTACAGCACCTACACCTCAGTTACAAGCCTTCAAAAATGAAGTAGGAGTACTCAGGTGAGCTTGTGTGAATTACTCTTTTCCAGAGAAAGAAGTTATTTTTATTAGCT	VAVKMLNVTAPTPQLQAFKNEVGVLR*ACVNYSFPEKEVIFIS	14	12	18	3	4	7		134.777	100.195	151.693	29.3634	35.2777	63.1325		128.888	42.5912		3.02618
TGTGGCAGTGAAAATGTTGAATGTGACAGCACCTACACCTCAGTTACAAGCCTTCAAAAATGAAGTAGGAGTAATCAGGTGAGCTTGTGTGAATTACTCTTTTCCAGAGAAAGAAGTTATTTTTATTAGCT	VAVKMLNVTAPTPQLQAFKNEVGVIR*ACVNYSFPEKEVIFIS	13	13	18	4	5	11		125.15	108.545	151.693	39.1512	44.0972	99.2081		128.463	60.8188		2.11222
TGTGGCAGTGAAAATGTTGAATGTGACAGCACCTACACCTCAGAAGGCACCAAGCCTTCAAAAATGAAGTAGGAGTACTCAGGTGAGCTTGTGTGAATTACTCTTTTCCAGAGAAAGAAGTTATTTTTATT	VAVKMLNVTAPTPQKAPSLQK*SRSTQVSLCELLFSRERSYFY	40	0	0	0	0	0		385.078	0	0	0	0	0		128.359	0		-1
TGTGGCAGTGAAAATGTTGAATGTGACAGCACCTACACTGTTACAAGCCTTCAAAAATGAAGTAGGAGTACTCAGGTGAGCTTGTGTGAATTACTCTTTTCCAGAGAAAGAAGTTATTTTTATTAGCTCCT	VAVKMLNVTAPTLLQAFKNEVGVLR*ACVNYSFPEKEVIFISS	19	20	4	1	1	3		182.912	166.992	33.7095	9.7878	8.81943	27.0568		127.871	15.2213		8.4008
TGTGGCAGTGAAAATGTTGAATGTGACAGCACCTACACCTCAGTTACAAGCCTTCAAAAATGAAGTAGGAGTACTCAGGTGAGCTTGTGGGAATTACTCTTTTCCAGAGAAAGAAGTTATTTTTATTAGCT	VAVKMLNVTAPTPQLQAFKNEVGVLR*ACGNYSFPEKEVIFIS	11	14	19	4	4	12		105.897	116.895	160.12	39.1512	35.2777	108.227		127.637	60.8853		2.09635
TGTGGCAGTGAAAATGTTGAATGTGACAGCACCTACACCTCAGTTACAAGCCTTCAAAAATGAAGTAGGAGTACTCAGGTGAGCTTGTGTGAATTACTCTTTTCCAGAGAAAGAAGTTATTTTTATTAGCA	VAVKMLNVTAPTPQLQAFKNEVGVLR*ACVNYSFPEKEVIFIS	11	19	14	4	7	9		105.897	158.643	117.983	39.1512	61.736	81.1703		127.507	60.6858		2.10111
TGTGGCAGTGAAAATGTTGAATGTGACAGCACCTACACCTCAGTTACAAGCCTTCAAAAATGAAGTAGGAGTACTCAGGTGAGCTTGTGTGAATTACTCTTTTCAGAGAAAGAAGTTATTTTTATTAGCTC	VAVKMLNVTAPTPQLQAFKNEVGVLR*ACVNYSFQRKKLFLLA	10	8	26	2	3	2		96.2696	66.7969	219.112	19.5756	26.4583	18.0378		127.393	21.3572		5.96485
TGTGGCAGTGAAAATGTTGAATGTGACAGCACCTACACCTCAGTTACAAGCCTTCAAAAATGAAGTAGGAGTACTCAGGTGAGCTTGTGTGAATTACTCTTTTCCAGAGAAAGAAGTTATTTTTGTTAGCT	VAVKMLNVTAPTPQLQAFKNEVGVLR*ACVNYSFPEKEVIFVS	9	20	15	5	5	12		86.6426	166.992	126.411	48.939	44.0972	108.227		126.682	67.0877		1.8883
TGTGGCAGTGAAAATGTTGAATGTGACAGTAGGAGTACTCAGGTGAGCTTGTGTGAATTACTCTTTTCCAGAGAAAGAAGTTATTTTTATTAGCTCCTGGTTCCCAGTGGACAGTGCAGGGGAAAGAATAG	VAVKMLNVTVGVLR*ACVNYSFPEKEVIFISSWFPVDSAGERI	1	9	35	2	3	23		9.62696	75.1465	294.958	19.5756	26.4583	207.435		126.577	84.4897		1.49814
TGTGGCAGTGAAAATGTTGAATGTGACAGCATTTATTAGCTCCTGGTTCCCAGTGGACAGTGCAGGGGAAAGAATAGTAGAAGATCGGAAGAGCACACGTCTGAACTCCAGTCACTTGAACATATCTCGTA	VAVKMLNVTAFISSWFPVDSAGERIVEDRKSTRLNSSHLNISR	0	0	45	0	0	0		0	0	379.232	0	0	0		126.411	0		-1
TGTGGCAGTGAAAATGTTGTATGTGACAGCACCTACACCTCAGTTACAAGCCTTCAAAAATGAAGTAGGAGTACTCAGGTGAGCTTGTGTGAATTACTCTTTTCCAGAGAAAGAAGTTATTTTTATTAGCT	VAVKMLYVTAPTPQLQAFKNEVGVLR*ACVNYSFPEKEVIFIS	15	18	10	4	2	5		144.404	150.293	84.2737	39.1512	17.6389	45.0946		126.324	33.9616		3.71961
TGTGGCAGTGAAAATGTTGAATGTGACAGCACCTACACCTCAGTGTAGTTACAAGCCTTCAAAAATGAAGTAGGAGTACTCAGGTGAGCTTGTGTGAATTACTCTTTTCCAGAGAAAGAAGTTATTTTTAT	VAVKMLNVTAPTPQCSYKPSKMK*EYSGELV*ITLFQRKKLFL	7	6	31	4	8	19		67.3887	50.0977	261.248	39.1512	70.5554	171.36		126.245	93.6887		1.34749
TGTGGCAGTGAAAATGTTGAATGTGACAGCACCTACACCTCAGTTACAAGCCTTTAAAAATGAAGTAGGAGTACTCAGGTGAGCTTGTGTGAATTACTCTTTTCCAGAGAAAGAAGTTATTTTTATTAGCT	VAVKMLNVTAPTPQLQAFKNEVGVLR*ACVNYSFPEKEVIFIS	14	17	12	3	1	12		134.777	141.943	101.128	29.3634	8.81943	108.227		125.95	48.8033		2.58076
TGTGGCAGTGAAAATGTTGAATGTGACAGCACCCAGTTACAAGCCTTCAAAAATGAAGTAGGAGTACTCAGGTGAGCTTGTGTGAATTACTCTTTTCCAGAGAAAGAAGTTATTTTTATTAGCTCCTGGTT	VAVKMLNVTAPSYKPSKMK*EYSGELV*ITLFQRKKLFLLAPG	12	9	22	32	44	99		115.523	75.1465	185.402	313.21	388.055	892.873		125.357	531.379		0.235909
TGTGGCAGTGAAAATGTTGAATGTGACAGCACCTACACCTCAGTTACAAGCCTTCAAAAATGAAGTAGGAGTACTCAGGTGAGCTTGTGTGAATTACTCTTTTCCAGAGAAAGAAGTTATTTTTATTATCT	VAVKMLNVTAPTPQLQAFKNEVGVLR*ACVNYSFPEKEVIFII	11	15	17	3	2	11		105.897	125.244	143.265	29.3634	17.6389	99.2081		124.802	48.7368		2.56073
TGTGGAAGTGAAAATGTTGAATGTGACAGCACCTACACCTCAGTTACAAGCCTTCAAAAATGAAGTAGGAGTACTCAGGTGAGCTTGTGTGAATTACTCTTTTCCAGAGAAAGAAGTTATTTTTATTAGCT	VEVKMLNVTAPTPQLQAFKNEVGVLR*ACVNYSFPEKEVIFIS	10	16	17	4	2	6		96.2696	133.594	143.265	39.1512	17.6389	54.1135		124.376	36.9679		3.36444
TGTGGCAGTGAAAATGTTGAATGTGACAGCACCTACACCTCAGTTACAAGCCTTCAAAAATGAAGTAGGCGTACTCAGGTGAGCTTGTGTGAATTACTCTTTTCCAGAGAAAGAAGTTATTTTTATTAGCT	VAVKMLNVTAPTPQLQAFKNEVGVLR*ACVNYSFPEKEVIFIS	16	15	11	7	1	13		154.031	125.244	92.7011	68.5146	8.81943	117.246		123.992	64.86		1.91169
TGTGGCAGTGAAAATGTTGAATGTGACAGCACCTACACCTCAGTTACAGTTACAAGCCTTCAAAAATGAAGTAGGAGTACTCAGGTGAGCTTGTGTGAATTACTCTTTTCCAGAGAAAGAAGTTATTTTTA	VAVKMLNVTAPTPQLQLQAFKNEVGVLR*ACVNYSFPEKEVIF	14	15	13	10	7	14		134.777	125.244	109.556	97.878	61.736	126.265		123.192	95.293		1.29278
TGTGGCAGTGAAAATGTTGAATGTGACAGCACCTACACCTCAGCAAAGCCTTCAAAAATGAAGTAGGAGTACTCAGGTGAGCTTGTGTGAATTACTCTTTTCCAGAGAAAGAAGTTATTTTTATTAGCTCC	VAVKMLNVTAPTPQQSLQK*SRSTQVSLCELLFSRERSYFY*L	11	22	9	13	27	32		105.897	183.692	75.8463	127.241	238.125	288.605		121.811	217.991		0.558792
TGTGGCAGTGAAAATGTTGAATGTGACAGCACTTACAAGCCTTCAAAAATGAAGTAGGAGTACTCAGGTGAGCTTGTGTGAATTACTCTTTTCCAGAGAAAGAAGTTATTTTTATTAGCTCCTGGTTCCCA	VAVKMLNVTALTSLQK*SRSTQVSLCELLFSRERSYFY*LLVP	9	5	28	12	9	23		86.6426	41.7481	235.966	117.454	79.3749	207.435		121.452	134.755		0.901286
TGTGGCAGTGAAAATGTTGAATGTGACAGCACCTACACCTACACCTCAGTTACAAGCCTTCAAAAATGAAGTAGGAGTACTCAGGTGAGCTTGTGTGAATTACTCTTTTCCAGAGAAAGAAGTTATTTTTA	VAVKMLNVTAPTPTPQLQAFKNEVGVLR*ACVNYSFPEKEVIF	16	14	11	17	12	24		154.031	116.895	92.7011	166.393	105.833	216.454		121.209	162.893		0.7441
TGTGGCAGTGAAAATGTTGAATGTGACAGCACCTACACCTCAGCACCAGTTACAAGCCTTCAAAAATGAAGTAGGAGTACTCAGGTGAGCTTGTGTGAATTACTCTTTTCCAGAGAAAGAAGTTATTTTTA	VAVKMLNVTAPTPQHQLQAFKNEVGVLR*ACVNYSFPEKEVIF	8	0	34	3	3	10		77.0156	0	286.531	29.3634	26.4583	90.1892		121.182	48.6703		2.48986
TGTGGCAGTGAAAATGTTGAATGTGACAGCACCTACACCTCAGGTGTAGCCTTCAAAAATGAAGTAGGAGTACTCAGGTGAGCTTGTGTGAATTACTCTTTTCCAGAGAAAGAAGTTATTTTTATTAGCTC	VAVKMLNVTAPTPQV*PSKMK*EYSGELV*ITLFQRKKLFLLA	8	10	24	20	16	12		77.0156	83.4962	202.257	195.756	141.111	108.227		120.923	148.365		0.815038
TGTGGCAGTGAAAATGTTGAATGTGACAGCACCTACACCTCAGGAGTACTCAGGTGAGCTTGTGTGAATTACTCTTTTCCAGAGAAAGAAGTTATTTTTATTAGCTCCTGGTTCCCAGTGGACAGTGCAGG	VAVKMLNVTAPTPQEYSGELV*ITLFQRKKLFLLAPGSQWTVQ	2	27	14	11	21	33		19.2539	225.44	117.983	107.666	185.208	297.624		120.892	196.833		0.614188
TGTGGCAGTGAAAATGTTGAATGTGACAGCACCTACACCTCAGTTACAAGCCTTCAAAAATGAAGTAGGAGTACTCAGGTGAGCTTGTGTGAATTAATCTTTTCCAGAGAAAGAAGTTATTTTTATTAGCT	VAVKMLNVTAPTPQLQAFKNEVGVLR*ACVN*SFPEKEVIFIS	8	24	10	3	4	12		77.0156	200.391	84.2737	29.3634	35.2777	108.227		120.56	57.6227		2.09223
TGTGGCAGTGAAAATGTTGAATGTGACAGCACCTACACCTCAGTTACAAGCCTTCAAAAATGAAGTAGTAGTACTCAGGTGAGCTTGTGTGAATTACTCTTTTCCAGAGAAAGAAGTTATTTTTATTAGCT	VAVKMLNVTAPTPQLQAFKNEVVVLR*ACVNYSFPEKEVIFIS	14	12	15	3	2	2		134.777	100.195	126.411	29.3634	17.6389	18.0378		120.461	21.68		5.55631
TGTGGCAGTGAAAATGTTGAATGTGACAGCACCTACACCTTCAAAGTTACAAGCCTTCAAAAATGAAGTAGGAGTACTCAGGTGAGCTTGTGTGAATTACTCTTTTCCAGAGAAAGAAGTTATTTTTATTA	VAVKMLNVTAPTPSKLQAFKNEVGVLR*ACVNYSFPEKEVIFI	12	0	29	3	3	7		115.523	0	244.394	29.3634	26.4583	63.1325		119.972	39.6514		3.02568
TGTGGCAGTGAAAATGTTGAATGTGACAGCACCTACACCTACACCTCATTTTGAAGGTTACAAGCCTTCAAAAATGAAGTAGGAGTACTCAGGTGAGCTTGTGTGAATTACTCTTTTCCAGAGAAAGAAGT	VAVKMLNVTAPTPTPHFEGYKPSKMK*EYSGELV*ITLFQRKK	0	0	42	0	0	0		0	0	353.949	0	0	0		117.983	0		-1
TGTGGCAGTGAAAATGTTGAATGTGACAGCACCTACACCTTTGAAGGCTTGTAACAGTTACAAGCCTTCAAAAATGAAGTAGGAGTACTCAGGTGAGCTTGTGTGAATTACTCTTTTCCAGAGAAAGAAGT	VAVKMLNVTAPTPLKACNSYKPSKMK*EYSGELV*ITLFQRKK	0	0	42	0	0	0		0	0	353.949	0	0	0		117.983	0		-1
TGTGGCAGTGAACATGTTGAATGTGACAGCACCTACACCTCAGTTACAAGCCTTCAAAAATGAAGTAGGAGTACTCAGGTGAGCTTGTGTGAATTACTCTTTTCCAGAGAAAGAAGTTATTTTTATTAGCT	VAVNMLNVTAPTPQLQAFKNEVGVLR*ACVNYSFPEKEVIFIS	13	12	15	3	1	9		125.15	100.195	126.411	29.3634	8.81943	81.1703		117.252	39.7844		2.94719
TGTGGCAGTGAAAATGTTGAATGTGACAGCACCTACACCTCAGTCAAAAATGAAGTAGGAGTACTCAGGTGAGCTTGTGTGAATTACTCTTTTCCAGAGAAAGAAGTTATTTTTATTAGCTCCTGGTTCCC	VAVKMLNVTAPTPQSKMK*EYSGELV*ITLFQRKKLFLLAPGS	24	9	5	6	7	22		231.047	75.1465	42.1368	58.7268	61.736	198.416		116.11	106.293		1.09236
TGTGGCAGTGAAAATGTTGAATGTGACAGCACCTACACCTCAGTTACAAGCCTTCAAAAATGAAGTTGGAGTACTCAGGTGAGCTTGTGTGAATTACTCTTTTCCAGAGAAAGAAGTTATTTTTATTAGCT	VAVKMLNVTAPTPQLQAFKNEVGVLR*ACVNYSFPEKEVIFIS	10	15	15	2	2	5		96.2696	125.244	126.411	19.5756	17.6389	45.0946		115.975	27.4364		4.22705
TGTGGCAGTGAAAATGTTGAATGTGACAGCACCTACACCTCAGAAGTAGGAGTACTCAGGTGAGCTTGTGTGAATTACTCTTTTCCAGAGAAAGAAGTTATTTTTATTAGCTCCTGGTTCCCAGTGGACAG	VAVKMLNVTAPTPQK*EYSGELV*ITLFQRKKLFLLAPGSQWT	2	5	34	23	28	48		19.2539	41.7481	286.531	225.119	246.944	432.908		115.844	301.657		0.384026
TGTGGCAGTGAAAATGTTGAATGTGACAGCACCTACACCTCAAAAATGAAGTTACAAGCCTTCAAAAATGAAGTAGGAGTACTCAGGTGAGCTTGTGTGAATTACTCTTTTCCAGAGAAAGAAGTTATTTT	VAVKMLNVTAPTPQK*SYKPSKMK*EYSGELV*ITLFQRKKLF	9	7	24	12	18	13		86.6426	58.4473	202.257	117.454	158.75	117.246		115.782	131.15		0.882825
TGTGGCAGTGAAAATGTTGAATGTGACAGCACCTACACCTCTACAAGCCTTCAAAAATGAAGTAGGAGTACTCAGGTGAGCTTGTGTGAATTACTCTTTTCCAGAGAAAGAAGTTATTTTTATTAGCTCCT	VAVKMLNVTAPTPLQAFKNEVGVLR*ACVNYSFPEKEVIFISS	3	29	9	14	4	29		28.8809	242.139	75.8463	137.029	35.2777	261.549		115.622	144.619		0.799496
TGTGGCAGTGAAAATGTTGAATGTGACAGCACCAACACCTCAGTTACAAGCCTTCAAAAATGAAGTAGGAGTACTCAGGTGAGCTTGTGTGAATTACTCTTTTCCAGAGAAAGAAGTTATTTTTATTAGCT	VAVKMLNVTAPTPQLQAFKNEVGVLR*ACVNYSFPEKEVIFIS	9	15	16	6	4	3		86.6426	125.244	134.838	58.7268	35.2777	27.0568		115.575	40.3538		2.86404
TGTGGCAGTGAAAATGTGTTACAAGCCTTCAAAAATGAAGTAGGAGTACTCAGGTGAGCTTGTGTGAATTACTCTTTTCCAGAGAAAGAAGTTATTTTTATTAGCTCCTGGTTCCCAGTGGACAGTGCAGG	VAVKMCYKPSKMK*EYSGELV*ITLFQRKKLFLLAPGSQWTVQ	36	0	0	1	0	0		346.57	0	0	9.7878	0	0		115.523	3.2626		35.4084
TGTGGCAGTGAAAATGTTGAATGTGACATGTAACATTTGAAGTTACAAGCCTTCAAAAATGAAGTAGGAGTACTCAGGTGAGCTTGTGTGAATTACTCTTTTCCAGAGAAAGAAGTTATTTTTATTAGCTC	VAVKMLNVTCNI*SYKPSKMK*EYSGELV*ITLFQRKKLFLLA	36	0	0	0	0	0		346.57	0	0	0	0	0		115.523	0		-1
TGTGGCAGTGAAAATGTTGAATGTGACAGCACCTACACCTCAGCCTTCAAAATGAAGTAGGAGTACTCAGCCTTCAAAAATGAAGTAGGAGTACTCAGGTGAGCTTGTGTGAATTACTCTTTTCCAGAGAA	VAVKMLNVTAPTPQPSK*SRSTQPSKMK*EYSGELV*ITLFQR	0	0	41	0	0	0		0	0	345.522	0	0	0		115.174	0		-1
TGTGGCAGTGAAAATGTTGAATGTGACAGCACCAGCCTTCAAAAATGAAGTAGGAGTACTCAGGTGAGCTTGTGTGAATTACTCTTTTCCAGAGAAAGAAGTTATTTTTATTAGCTCCTGGTTCCCAGTGG	VAVKMLNVTAPAFKNEVGVLR*ACVNYSFPEKEVIFISSWFPV	34	1	1	5	7	6		327.316	8.34962	8.42737	48.939	61.736	54.1135		114.698	54.9295		2.08809
TGTGGCAGTGAAAATGTTGAATGTGACAGCACCTACACCTCAGTTACAAGCCTTCAAAAATGAAGTAGGAGTACTCAGGTGAGCTTGTGTGAATTACTCTTTTCCAGAGTAAGAAGTTATTTTTATTAGCT	VAVKMLNVTAPTPQLQAFKNEVGVLR*ACVNYSFPE*EVIFIS	5	11	24	1	1	6		48.1348	91.8458	202.257	9.7878	8.81943	54.1135		114.079	24.2403		4.70619
TGTGGCAGTGAAAATGTTGAATGTGACAGCACCTACACCTCAGTTACAAGCCTTCAAAAATGAAGTAGGAGTACTCAGGTGAGCTTGTGTGAATTACTCTTTTCCAGAGCAAGAAGTTATTTTTATTAGCT	VAVKMLNVTAPTPQLQAFKNEVGVLR*ACVNYSFPEQEVIFIS	10	13	16	1	6	10		96.2696	108.545	134.838	9.7878	52.9166	90.1892		113.217	50.9645		2.2215
TGTGGCAGTGAAAATGTTGAATGTGACAGCACCTACACCTCAGTGTACAAGCCTTCAAAAATGAAGTAGGAGTACTCAGGTGAGCTTGTGTGAATTACTCTTTTCCAGAGAAAGAAGTTATTTTTATTAGC	VAVKMLNVTAPTPQCTSLQK*SRSTQVSLCELLFSRERSYFY*	10	27	2	13	7	21		96.2696	225.44	16.8547	127.241	61.736	189.397		112.855	126.125		0.894785
TGTGGCAGTGAAAATGTTGAATGTGACAGCACCTACACCTCAGTTACAAGCCTTCAAAAATGAAGTAGGAGTACTCTGGTGAGCTTGTGTGAATTACTCTTTTCCAGAGAAAGAAGTTATTTTTATTAGCT	VAVKMLNVTAPTPQLQAFKNEVGVLW*ACVNYSFPEKEVIFIS	14	12	12	2	3	6		134.777	100.195	101.128	19.5756	26.4583	54.1135		112.034	33.3825		3.35606
TGTGGCAGTGAAAATGTTGAATGTGACAGCACCTACACCTCAGTGAAGTAGGAGTACTCAGGTGAGCTTGTGTGAATTACTCTTTTCCAGAGAAAGAAGTTATTTTTATTAGCTCCTGGTTCCCAGTGGAC	VAVKMLNVTAPTPQ*SRSTQVSLCELLFSRERSYFY*LLVPSG	12	0	26	13	16	36		115.523	0	219.112	127.241	141.111	324.681		111.545	197.678		0.564277
TGTGGCAGTGAAAATGTTGAATGCAGTTACAAGCCTTCAAAAATGAAGTAGGAGTACTCAGGTGAGCTTGTGTGAATTACTCTTTTCCAGAGAAAGAAGTTATTTTTATTAGCTCCTGGTTCCCAGTGGAC	VAVKMLNAVTSLQK*SRSTQVSLCELLFSRERSYFY*LLVPSG	25	9	2	10	1	13		240.674	75.1465	16.8547	97.878	8.81943	117.246		110.892	74.6478		1.48553
TGTGGCAGTGAAAATGTTGAATGTGACAGCACCTACACCTCAGTTACAAGCCTTCAAAAATGAAGTAGGAGTACTCAGGTGAGCTTGTGTGAATTACTCTTTTCCATAGAAAGAAGTTATTTTTATTAGCT	VAVKMLNVTAPTPQLQAFKNEVGVLR*ACVNYSFP*KEVIFIS	18	12	7	3	4	13		173.285	100.195	58.9916	29.3634	35.2777	117.246		110.824	60.629		1.8279
TGTGGCAGTGAAAATGTTGAATGTGACAGCACCTACACCCTTCAAAAATGAAGTAGGAGTACTCAGGTGAGCTTGTGTGAATTACTCTTTTCCAGAGAAAGAAGTTATTTTTATTAGCTCCTGGTTCCCAG	VAVKMLNVTAPTPFKNEVGVLR*ACVNYSFPEKEVIFISSWFP	1	1	37	4	2	18		9.62696	8.34962	311.813	39.1512	17.6389	162.341		109.93	73.0436		1.50499
TGTGGCAGTGAAAATGTTGAATGTGACAGCACCTACCCAGTTACAAGCCTTCAAAAATGAAGTAGGAGTACTCAGGTGAGCTTGTGTGAATTACTCTTTTCCAGAGAAAGAAGTTATTTTTATTAGCTCCT	VAVKMLNVTAPTQLQAFKNEVGVLR*ACVNYSFPEKEVIFISS	2	17	20	0	2	6		19.2539	141.943	168.547	0	17.6389	54.1135		109.915	23.9175		4.59559
TGTGGCAGTGAAAATGTTGAATGTGACAGAACCTACACCTCAGTTACAAGCCTTCAAAAATGAAGTAGGAGTACTCAGGTGAGCTTGTGTGAATTACTCTTTTCCAGAGAAAGAAGTTATTTTTATTAGCT	VAVKMLNVTEPTPQLQAFKNEVGVLR*ACVNYSFPEKEVIFIS	8	12	18	2	1	7		77.0156	100.195	151.693	19.5756	8.81943	63.1325		109.635	30.5092		3.5935
TGTGGCAGTGAAAATGTTGAATGTGACAGCACCTACACCTCAGTTACAAGCCTTCAAAAATGAAGTAGGAGTACTCAGGTGAGCTTGTGTGAATTACTCTTTACCAGAGAAAGAAGTTATTTTTATTAGCT	VAVKMLNVTAPTPQLQAFKNEVGVLR*ACVNYSLPEKEVIFIS	13	17	7	3	3	9		125.15	141.943	58.9916	29.3634	26.4583	81.1703		108.695	45.664		2.38033
TGTGGCAGTGAAAATGTTGAATGTGACAGCACCTACACCTCAACAAGCCTTCAAAAATGAAGTAGGAGTACTCAGGTGAGCTTGTGTGAATTACTCTTTTCCAGAGAAAGAAGTTATTTTTATTAGCTCCT	VAVKMLNVTAPTPQQAFKNEVGVLR*ACVNYSFPEKEVIFISS	13	23	1	3	14	31		125.15	192.041	8.42737	29.3634	123.472	279.587		108.54	144.141		0.753012
TGTGGCAGTGAAAATGTTGAATGTGACAGCACCTACACCTCAGTTACAAGCCATCAAAAATGAAGTAGGAGTACTCAGGTGAGCTTGTGTGAATTACTCTTTTCCAGAGAAAGAAGTTATTTTTATTAGCT	VAVKMLNVTAPTPQLQAIKNEVGVLR*ACVNYSFPEKEVIFIS	12	12	13	4	1	6		115.523	100.195	109.556	39.1512	8.81943	54.1135		108.425	34.0281		3.18634
TGTGGCAGTGAAAATGTTGAATGTGACAGCACCTACACCTCAGTTACAAGCCTTCAAAAATGAAGTAGGAGTACTCAGGTGAGCTTGTGAGAATTACTCTTTTCCAGAGAAAGAAGTTATTTTTATTAGCT	VAVKMLNVTAPTPQLQAFKNEVGVLR*ACENYSFPEKEVIFIS	12	14	11	1	0	8		115.523	116.895	92.7011	9.7878	0	72.1514		108.373	27.3131		3.96781
TGTGGCAGTGAAAATGTTGAATGTGACAGCACCTACACCTCAGTAACAAGCCTTCAAAAATGAAGTAGGAGTACTCAGGTGAGCTTGTGTGAATTACTCTTTTCCAGAGAAAGAAGTTATTTTTATTAGCT	VAVKMLNVTAPTPQ*QAFKNEVGVLR*ACVNYSFPEKEVIFIS	2	11	25	2	5	21		19.2539	91.8458	210.684	19.5756	44.0972	189.397		107.261	84.3567		1.27152
TGTGGCAGTGAAAATGTTGAATGTGACAGCACCTACACCTCAGTTACAAGCCTTCAAAAATGAAGTAGGAGTACTCAGGTGAGCTTGTGTGAATTACTCTTTTCCAGAGAACGAAGTTATTTTTATTAGCT	VAVKMLNVTAPTPQLQAFKNEVGVLR*ACVNYSFPENEVIFIS	9	15	13	5	6	8		86.6426	125.244	109.556	48.939	52.9166	72.1514		107.148	58.0023		1.8473
TGTGGCAGTGAAAATGTTGAATGTGACAGCACCTACGCCTTCAAAAATGAAGTAGGAGTACTCAGGTGAGCTTGTGTGAATTACTCTTTTCCAGAGAAAGAAGTTATTTTTATTAGCTCCTGGTTCCCAGT	VAVKMLNVTAPTPSKMK*EYSGELV*ITLFQRKKLFLLAPGSQ	20	9	6	27	34	61		192.539	75.1465	50.5642	264.271	299.861	550.154		106.083	371.428		0.285609
TGTGGCAGTGAAAATGTTGAATGTGACAGCACCTACACCTCAGCAGTTACAACAGTTACAAGCCTTCAAAAATGAAGTAGGAGTACTCAGGTGAGCTTGTGTGAATTACTCTTTTCCAGAGAAAGAAGTTA	VAVKMLNVTAPTPQQLQQLQAFKNEVGVLR*ACVNYSFPEKEV	33	0	0	3	0	0		317.69	0	0	29.3634	0	0		105.897	9.7878		10.8192
TGTGGCAGTGAAAATGTTGAATGAAGTACTCAGGTGAGCTTGTGTGAATTACTCTTTTCCAGAGAAAGAAGTTATTTTTATTAGCTCCTGGTTCCCAGTGGACAGTGCAGGGGAAAGAATAGTAGAAGATC	VAVKMLNEVLR*ACVNYSFPEKEVIFISSWFPVDSAGERIVED	0	38	0	0	0	0		0	317.285	0	0	0	0		105.762	0		-1
TGTGGCAGTGAAAATGTTGAATGTGACAGCACCTACACCTCAGTTACAAGCCTTCAAAAATGAAGTAGGAGTACTCAGGTGAGCTTGTGTTAATTACTCTTTTCCAGAGAAAGAAGTTATTTTTATTAGCT	VAVKMLNVTAPTPQLQAFKNEVGVLR*ACVNYSFPEKEVIFIS	11	11	14	6	0	6		105.897	91.8458	117.983	58.7268	0	54.1135		105.242	37.6134		2.79798
TGTGGCAGTGAAAATGTTGAATGTGACAGCACCTACACCTCTCAGTTACAAGCCTTCAAAAATGAAGTAGGAGTACTCAGGTGAGCTTGTGTGAATTACTCTTTTCCAGAGAAAGAAGTTATTTTTATTAG	VAVKMLNVTAPTPLSYKPSKMK*EYSGELV*ITLFQRKKLFLL	4	13	20	13	26	39		38.5078	108.545	168.547	127.241	229.305	351.738		105.2	236.095		0.445584
TGTGGCAGTGAAAATGTTGAATGTGACAGCACCTACAACAGTTACAAGCCTTCAAAAATGAAGTAGGAGTACTCAGGTGAGCTTGTGTGAATTACTCTTTTCCAGAGAAAGAAGTTATTTTTATTAGCTCC	VAVKMLNVTAPTTVTSLQK*SRSTQVSLCELLFSRERSYFY*L	11	13	12	21	32	53		105.897	108.545	101.128	205.544	282.222	478.003		105.19	321.923		0.326755
TGTGGCAGTGAAAATGTTGAATGTGACAGCACCTACACCTCAGTTACAAGCCTACAAAAATGAAGTAGGAGTACTCAGGTGAGCTTGTGTGAATTACTCTTTTCCAGAGAAAGAAGTTATTTTTATTAGCT	VAVKMLNVTAPTPQLQAYKNEVGVLR*ACVNYSFPEKEVIFIS	10	13	13	4	4	3		96.2696	108.545	109.556	39.1512	35.2777	27.0568		104.79	33.8286		3.09768
TGTGGCAGTGAAAATGTTGAATGTGACAGCACCTACACCTCAGTTACAAGCCTTCAAAAATGAAGTAGGAGTACTCAGGTGAGCTTGTGTGAATTACTCTTTTCCAGAGAAAGAAGTTAATTTTATTAGCT	VAVKMLNVTAPTPQLQAFKNEVGVLR*ACVNYSFPEKEVNFIS	23	3	8	3	1	3		221.42	25.0488	67.4189	29.3634	8.81943	27.0568		104.629	21.7465		4.81131
TGTGGCAGTGAAAATGTTGAATGTGACAGCACCTACACCTCAGTTACAAGCCTTCAAAAATTAAGTAGGAGTACTCAGGTGAGCTTGTGTGAATTACTCTTTTCCAGAGAAAGAAGTTATTTTTATTAGCT	VAVKMLNVTAPTPQLQAFKN*VGVLR*ACVNYSFPEKEVIFIS	9	14	13	3	0	3		86.6426	116.895	109.556	29.3634	0	27.0568		104.364	18.8067		5.54931
TGTGGCAGTGAAAATGTTGAATGTGACAGCACCTACACCTCAGAATGAAGTAGGAGTACTCAGGTGAGCTTGTGTGAATTACTCTTTTCCAGAGAAAGAAGTTATTTTTATTAGCTCCTGGTTCCCAGTGG	VAVKMLNVTAPTPQNEVGVLR*ACVNYSFPEKEVIFISSWFPV	16	14	5	17	14	33		154.031	116.895	42.1368	166.393	123.472	297.624		104.354	195.83		0.532883
TGTGGCAGTGAAAATGTTGAATGTGACAGCTCCTACACCTCAGTTACAAGCCTTCAAAAATGAAGTAGGAGTACTCAGGTGAGCTTGTGTGAATTACTCTTTTCCAGAGAAAGAAGTTATTTTTATTAGCT	VAVKMLNVTAPTPQLQAFKNEVGVLR*ACVNYSFPEKEVIFIS	9	17	10	3	2	3		86.6426	141.943	84.2737	29.3634	17.6389	27.0568		104.287	24.6863		4.22446
TGTGGCAGTGAAAATGTTGAATGTGACAGCAAGCCTTCAAAAATGAAGTAGGAGTACTCAGGTGAGCTTGTGTGAATTACTCTTTTCCAGAGAAAGAAGTTATTTTTATTAGCTCCTGGTTCCCAGTGGAC	VAVKMLNVTASLQK*SRSTQVSLCELLFSRERSYFY*LLVPSG	9	20	7	35	26	58		86.6426	166.992	58.9916	342.573	229.305	523.097		104.209	364.992		0.28551
TGTGGCAGTGAAAATGGTGAATGTGACAGCACCTACACCTCAGTTACAAGCCTTCAAAAATGAAGTAGGAGTACTCAGGTGAGCTTGTGTGAATTACTCTTTTCCAGAGAAAGAAGTTATTTTTATTAGCT	VAVKMVNVTAPTPQLQAFKNEVGVLR*ACVNYSFPEKEVIFIS	8	11	17	6	3	6		77.0156	91.8458	143.265	58.7268	26.4583	54.1135		104.042	46.4329		2.2407
TGTGGCAGTGAAAATGTTGAATGTGACAGCACCTACACCTCAGTTACAAGCCTTCAAAAATGAAGTAGGAGGACTCAGGTGAGCTTGTGTGAATTACTCTTTTCCAGAGAAAGAAGTTATTTTTATTAGCT	VAVKMLNVTAPTPQLQAFKNEVGGLR*ACVNYSFPEKEVIFIS	15	12	8	1	2	10		144.404	100.195	67.4189	9.7878	17.6389	90.1892		104.006	39.2053		2.65286
TGTGGCAGTGAAAATGTTGAATGTGACAGCACCTACACCTAAGTAGGAGTACTCAGGTGAGCTTGTGTGAATTACTCTTTTCCAGAGAAAGAAGTTATTTTTATTAGCTCCTGGTTCCCAGTGGACAGTGC	VAVKMLNVTAPTPK*EYSGELV*ITLFQRKKLFLLAPGSQWTV	0	0	37	0	1	6		0	0	311.813	0	8.81943	54.1135		103.938	20.9777		4.95468
TGTGGCAGTGAAAATGTTGAATGTGACAGCACCTACACCTCAGTTACAAGCCTTCAAAAATGAAGTAGGAGTTCTCAGGTGAGCTTGTGTGAATTACTCTTTTCCAGAGAAAGAAGTTATTTTTATTAGCT	VAVKMLNVTAPTPQLQAFKNEVGVLR*ACVNYSFPEKEVIFIS	14	12	9	0	1	7		134.777	100.195	75.8463	0	8.81943	63.1325		103.606	23.984		4.31982
TGTGGCAGTGAAAATGTTGAATGTGACAGCACCTACACCTCAAACAGTTACAAGCCTTCAAAAATGAAGTAGGAGTACTCAGGTGAGCTTGTGTGAATTACTCTTTTCCAGAGAAAGAAGTTATTTTTATT	VAVKMLNVTAPTPQTVTSLQK*SRSTQVSLCELLFSRERSYFY	1	36	0	13	10	51		9.62696	300.586	0	127.241	88.1943	459.965		103.404	225.134		0.459302
TGTGGCAGTGAAAATGTTGAATGTGACAGCACCTACACCTCAGGAGCAGTTACAAGCCTTCAAAAATGAAGTAGGAGTACTCAGGTGAGCTTGTGTGAATTACTCTTTTCCAGAGAAAGAAGTTATTTTTA	VAVKMLNVTAPTPQEQLQAFKNEVGVLR*ACVNYSFPEKEVIF	0	36	1	2	1	1		0	300.586	8.42737	19.5756	8.81943	9.01892		103.005	12.4713		8.25931
TGTGGCAGTGAAAATGTTGAATGTGACAGCACCTACACCTGAGGTGTAGGTGAGCTTGTGTGAATTACTCTTTTCCAGAGAAAGAAGTTATTTTTATTAGCTCCTGGTTCCCAGTGGACAGTGCAGGGGAA	VAVKMLNVTAPTPEV*VSLCELLFSRERSYFY*LLVPSGQCRG	0	37	0	0	0	0		0	308.936	0	0	0	0		102.979	0		-1
TGTGGCAGTGAAAATGTTGAATGTGACAGCACCTACACCTCAGTTACAAGCCTTCAAAAATGAAGTAGGAGTACTCAGGTTAGCTTGTGTGAATTACTCTTTTCCAGAGAAAGAAGTTATTTTTATTAGCT	VAVKMLNVTAPTPQLQAFKNEVGVLRLACVNYSFPEKEVIFIS	12	8	15	1	4	8		115.523	66.7969	126.411	9.7878	35.2777	72.1514		102.91	39.0723		2.63384
TGTGGCAGTGAAAATGTTGAATGTGACAGCACCTACACATTACCTACAGTTACCTACAGTTACCTACTGTAACCTACAGTTACAAGCCTTCAAAAATGAAGTAGGAGTACTCAGGTGAGCTTGTGTGAATT	VAVKMLNVTAPTHYLQLPTVTYCNLQLQAFKNEVGVLR*ACVN	32	0	0	0	0	0		308.063	0	0	0	0	0		102.688	0		-1
TGTGGCAGTGAAAATGTTGAATGTGACAGCACCTACACCTCAGTTACAAGCCTTCAAAAATGAAGTAGGAGTACTCAGGTGAGCTTGTGTGAATTACTTTTTTCCAGAGAAAGAAGTTATTTTTATTAGCT	VAVKMLNVTAPTPQLQAFKNEVGVLR*ACVNYFFPEKEVIFIS	10	12	13	8	4	11		96.2696	100.195	109.556	78.3024	35.2777	99.2081		102.007	70.9294		1.43815
TGTGGCAGTGAAAATGTTGAATGTGACAGCACCTACAAAAATGTTACAAGCCTTCAAAAATGAAGTAGGAGTACTCAGGTGAGCTTGTGTGAATTACTCTTTTCCAGAGAAAGAAGTTATTTTTATTAGCT	VAVKMLNVTAPTKMLQAFKNEVGVLR*ACVNYSFPEKEVIFIS	9	12	14	0	1	5		86.6426	100.195	117.983	0	8.81943	45.0946		101.607	17.9713		5.65384
TGTGGCAGTGAAAATGTTGAATGTGACAGCACCTACACCTCAGTTACAAGCCTTCAAAAATGAAGTAGGAGTACTCAGGTGAGCTTGTGTGATTTACTCTTTTCCAGAGAAAGAAGTTATTTTTATTAGCT	VAVKMLNVTAPTPQLQAFKNEVGVLR*ACVIYSFPEKEVIFIS	9	13	13	2	1	3		86.6426	108.545	109.556	19.5756	8.81943	27.0568		101.581	18.4839		5.49564
TGTGGCAGTGAAAATGTTGAATGTGACAGCACCTACACCTCAGTTACAAGCCTTCCAAAATGAAGTAGGAGTACTCAGGTGAGCTTGTGTGAATTACTCTTTTCCAGAGAAAGAAGTTATTTTTATTAGCT	VAVKMLNVTAPTPQLQAFQNEVGVLR*ACVNYSFPEKEVIFIS	15	10	9	1	1	3		144.404	83.4962	75.8463	9.7878	8.81943	27.0568		101.249	15.2213		6.65178
TGTGGCAGTGAAAATGTTGAATGTGACAGCACCTACACCTACACAGTTACAAGCCTTCAAAAATGAAGTAGGAGTACTCAGGTGAGCTTGTGTGAATTACTCTTTTCCAGAGAAAGAAGTTATTTTTATTA	VAVKMLNVTAPTPTQLQAFKNEVGVLR*ACVNYSFPEKEVIFI	7	3	25	2	4	7		67.3887	25.0488	210.684	19.5756	35.2777	63.1325		101.041	39.3286		2.56914
TGTGGCAGTGAAAATGTTGAATGTGACAGCACCTACACCTCAGCCTTCAAAGGCTTTACAAGCCTTCAAAAATGAAGTAGGAGTACTCAGGTGAGCTTGTGTGAATTACTCTTTTCCAGAGAAAGAAGTTA	VAVKMLNVTAPTPQPSKALQAFKNEVGVLR*ACVNYSFPEKEV	31	0	0	0	0	0		298.436	0	0	0	0	0		99.4785	0		-1
TGTGGCAGTGAAAATGTTGAATGTGACAGCACCTACTCTTTTCCAGAGAAAGAAGTTATTTTTATTAGCTCCTGGTTCCCAGTGGACAGTGCAGGGGAAAGAATAGTAGAAGATCGGAAGAGCACACGTCT	VAVKMLNVTAPTLFQRKKLFLLAPGSQWTVQGKE**KIGRAHV	24	6	2	7	7	9		231.047	50.0977	16.8547	68.5146	61.736	81.1703		99.3331	70.4736		1.40951
TGTGGCAGTGAAAATGTTGAATGTGACAGCACCTACACCTCTTCAAAAATGAAGTAGGAGTACTCAGGTGAGCTTGTGTGAATTACTCTTTTCCAGAGAAAGAAGTTATTTTTATTAGCTCCTGGTTCCCA	VAVKMLNVTAPTPLQK*SRSTQVSLCELLFSRERSYFY*LLVP	2	9	24	17	15	43		19.2539	75.1465	202.257	166.393	132.291	387.814		98.8858	228.833		0.432132
TGTGGCAGTGAAAATGTTGAATGTGACAGCACCTACACCTCGTAACACCTTGTTACAAGCCTTCAAAAATGAAGTAGGAGTACTCAGGTGAGCTTGTGTGAATTACTCTTTTCCAGAGAAAGAAGTTATTT	VAVKMLNVTAPTPRNTLLQAFKNEVGVLR*ACVNYSFPEKEVI	0	0	35	0	0	3		0	0	294.958	0	0	27.0568		98.3193	9.01892		10.9014
TGTGGCAGTGAAAATGTTGAATGTGACAGCACCTACACAAGCCTTCAAAATGAAGTAGGAGTACTCAGGTGAGCTTGTGTGAATTACTCTTTTCCAGAGAAAGAAGTTATTTTTATTAGCTCCTGGTTCCC	VAVKMLNVTAPTQAFKMK*EYSGELV*ITLFQRKKLFLLAPGS	0	0	35	0	1	1		0	0	294.958	0	8.81943	9.01892		98.3193	5.94612		16.535
TGTGGCAGTGAAAATGTTGAATGTGACAGCACCTACACTGAGGTTACAAGCCTTCAAAAATGAAGTAGGAGTACTCAGGTGAGCTTGTGTGAATTACTCTTTTCCAGAGAAAGAAGTTATTTTTATTAGCT	VAVKMLNVTAPTLRLQAFKNEVGVLR*ACVNYSFPEKEVIFIS	14	0	19	5	0	1		134.777	0	160.12	48.939	0	9.01892		98.2991	19.3193		5.08813
TGTGGCAGTGAAAATGTTGAATGTGACAGCACCTACACCTCAGTTACAAGCCTTCAAAAATGAAGTAGGAGTACTCAGGTGAGCTTGTGTGAATTACACTTTTCCAGAGAAAGAAGTTATTTTTATTAGCT	VAVKMLNVTAPTPQLQAFKNEVGVLR*ACVNYTFPEKEVIFIS	8	16	10	3	3	7		77.0156	133.594	84.2737	29.3634	26.4583	63.1325		98.2944	39.6514		2.47897
TGTGGCAGTGAAAATGTTGAATGTGACAGCACCTACACCTCAGTTTCAAGCCTTCAAAAATGAAGTAGGAGTACTCAGGTGAGCTTGTGTGAATTACTCTTTTCCAGAGAAAGAAGTTATTTTTATTAGCT	VAVKMLNVTAPTPQFQAFKNEVGVLR*ACVNYSFPEKEVIFIS	8	17	9	4	3	5		77.0156	141.943	75.8463	39.1512	26.4583	45.0946		98.2685	36.9014		2.663
TGTGGCAGTGAAAATGTTGAATGTGACAGCACCTACACCTTCAAGCCTTCAAAAATGAAGTAGGAGTACTCAGGTGAGCTTGTGTGAATTACTCTTTTCCAGAGAAAGAAGTTATTTTTATTAGCTCCTGG	VAVKMLNVTAPTPSSLQK*SRSTQVSLCELLFSRERSYFY*LL	14	6	13	12	23	23		134.777	50.0977	109.556	117.454	202.847	207.435		98.1436	175.912		0.557913
TGTGGCAGTGAAAATGTTGAATGTGACAGCACCTACACCTCAGTTACAAGCCTTCAAAAATGAAGTAGGAGTACTCCGGTGAGCTTGTGTGAATTACTCTTTTCCAGAGAAAGAAGTTATTTTTATTAGCT	VAVKMLNVTAPTPQLQAFKNEVGVLR*ACVNYSFPEKEVIFIS	13	5	15	5	1	7		125.15	41.7481	126.411	48.939	8.81943	63.1325		97.7697	40.297		2.42623
TGTGGCAGTGAAAATGTTGAATGTGACAGCACCTACACCTCAGTTACAAGCCTTCAAAAATGAAGTAGGAGTACTCAGGTGAGCTTGTGTGAAATACTCTTTTCCAGAGAAAGAAGTTATTTTTATTAGCT	VAVKMLNVTAPTPQLQAFKNEVGVLR*ACVKYSFPEKEVIFIS	13	10	10	2	4	4		125.15	83.4962	84.2737	19.5756	35.2777	36.0757		97.6401	30.3097		3.22142
TGTGGCAGTGAAAATGTTGAATGTGACAGCACCTACACCTCAGGTGTAGGCTTGTAACAAGCCTTCAAAAATGAAGTAGGAGTACTCAGGTGAGCTTGTGTGAATTACTCTTTTCCAGAGAAAGAAGTTAT	VAVKMLNVTAPTPQV*ACNKPSKMK*EYSGELV*ITLFQRKKL	0	35	0	0	0	0		0	292.237	0	0	0	0		97.4122	0		-1
TGTGGCAGTGAAAATGTTGAATGTGACAGCACTTCAAAAATGAAGTAGGAGTACTCAGGTGAGCTTGTGTGAATTACTCTTTTCCAGAGAAAGAAGTTATTTTTATTAGCTCCTGGTTCCCAGTGGACAGT	VAVKMLNVTALQK*SRSTQVSLCELLFSRERSYFY*LLVPSGQ	6	24	4	11	13	19		57.7617	200.391	33.7095	107.666	114.653	171.36		97.2873	131.226		0.741372
TGTGGCAGTGAAAATGTTGAATGTGACAGCACCTACACCTCCAGTTACAAGCCTTCAAAAATAAAGTAGGAGTACTCAGGTGAGCTTGTGTGAATTACTCTTTTCCAGAGAAAGAAGTTATTTTTATTAGC	VAVKMLNVTAPTPPVTSLQK*SRSTQVSLCELLFSRERSYFY*	9	12	12	15	7	28		86.6426	100.195	101.128	146.817	61.736	252.53		95.9888	153.694		0.624544
TGTGGCAGTGAAAATGTTGAATGTGACAGCACCTACACCTCAGTTAAAAGCCTTCAAAAATGAAGTAGGAGTACTCAGGTGAGCTTGTGTGAATTACTCTTTTCCAGAGAAAGAAGTTATTTTTATTAGCT	VAVKMLNVTAPTPQLKAFKNEVGVLR*ACVNYSFPEKEVIFIS	14	10	8	6	4	7		134.777	83.4962	67.4189	58.7268	35.2777	63.1325		95.2308	52.379		1.81811
TGTGGCAGTGAAAATGTTGAATGTGAAGTAGGAGTACTCAGGTGAGCTTGTGTGAATTACTCTTTTCCAGAGAAAGAAGTTATTTTTATTAGCTCCTGGTTCCCAGTGGACAGTGCAGGGGAAAGAATAGT	VAVKMLNVK*EYSGELV*ITLFQRKKLFLLAPGSQWTVQGKE*	6	6	21	7	16	11		57.7617	50.0977	176.975	68.5146	141.111	99.2081		94.9447	102.945		0.92229
TGTGGCAGTTAAAATGTTGAATGTGACAGCACCTACACCTCAGTTACAAGCCTTCAAAAATGAAGTAGGAGTACTCAGGTGAGCTTGTGTGAATTACTCTTTTCCAGAGAAAGAAGTTATTTTTATTAGCT	VAVKMLNVTAPTPQLQAFKNEVGVLR*ACVNYSFPEKEVIFIS	13	10	9	2	3	8		125.15	83.4962	75.8463	19.5756	26.4583	72.1514		94.831	39.3951		2.40718
TGTGGCAGTGAAAATGTTGAATGTGACAGCACCTACACCTCAGTTACAAGCCTTCAAAAATGAAGTAGGAGTACTCATGTGAGCTTGTGTGAATTACTCTTTTCCAGAGAAAGAAGTTATTTTTATTAGCT	VAVKMLNVTAPTPQLQAFKNEVGVLM*ACVNYSFPEKEVIFIS	13	10	9	3	0	6		125.15	83.4962	75.8463	29.3634	0	54.1135		94.831	27.8256		3.40804
TGTGGCAGTGAAAATGTTGAATGTGACAGCACCTACACGCCTTCAAAAATGAAGTAGGAGTACTCAGGTGAGCTTGTGTGAATTACTCTTTTCCAGAGAAAGAAGTTATTTTTATTAGCTCCTGGTTCCCA	VAVKMLNVTAPTRLQK*SRSTQVSLCELLFSRERSYFY*LLVP	0	27	7	9	3	6		0	225.44	58.9916	88.0902	26.4583	54.1135		94.8104	56.2207		1.6864
TGTGGCAGTGAAAATGTTGAATGTGACAGCACCTACAAGGTGTAACAGTTACAAGCCTTCAAAAATGAAGTAGGAGTACTCAGGTGAGCTTGTGTGAATTACTCTTTTCCAGAGAAAGAAGTTATTTTTAT	VAVKMLNVTAPTRCNSYKPSKMK*EYSGELV*ITLFQRKKLFL	0	34	0	0	0	0		0	283.887	0	0	0	0		94.629	0		-1
TGTGGCAGTGATAATGTTGAATGTGACAGCACCTACACCTCAGTTACAAGCCTTCAAAAATGAAGTAGGAGTACTCAGGTGAGCTTGTGTGAATTACTCTTTTCCAGAGAAAGAAGTTATTTTTATTAGCT	VAVIMLNVTAPTPQLQAFKNEVGVLR*ACVNYSFPEKEVIFIS	16	5	10	2	1	2		154.031	41.7481	84.2737	19.5756	8.81943	18.0378		93.351	15.4776		6.03135
TGTGGCAGTGAAAATGTTGAATGTGACAGCACCTACACCTTTTTTTGAATTTTTTGAAGTTACAAGCCTTCAAAAATGAAGTAGGAGTACTCAGGTGAGCTTGTGTGAATTACTCTTTTCCAGAGAAAGAA	VAVKMLNVTAPTPFFEFFEVTSLQK*SRSTQVSLCELLFSRER	29	0	0	0	0	0		279.182	0	0	0	0	0		93.0606	0		-1
TGTGGCAGTGAAAATGTTGAATGTGACAGTTACATTAAAAAAGAAGTTATTTTTATTAGCTCCTGGTTCCCAGTGGACAGTGCAGGGGAAAGAATAGTAGAAGATCGGAAGAGCACACGTCTGAACTCCAG	VAVKMLNVTVTLKKKLFLLAPGSQWTVQGKE**KIGRAHV*TP	29	0	0	0	0	0		279.182	0	0	0	0	0		93.0606	0		-1
TGTGGCAGTGAAAATGTTGAATGTGACAGCACCTACACCTAAGCCTTCAAAAATGAAGTAGGAGTACTCAGGTGAGCTTGTGTGAATTACTCTTTTCCAGAGAAAGAAGTTATTTTTATTAGCTCCTGGTT	VAVKMLNVTAPTPKPSKMK*EYSGELV*ITLFQRKKLFLLAPG	1	4	28	4	9	35		9.62696	33.3985	235.966	39.1512	79.3749	315.662		92.9972	144.729		0.642559
TGTGGCAGTGAAAATGTTGAATGTGACAGCACCTACACCTCAGTTACTAGCCTTCAAAAATGAAGTAGGAGTACTCAGGTGAGCTTGTGTGAATTACTCTTTTCCAGAGAAAGAAGTTATTTTTATTAGCT	VAVKMLNVTAPTPQLLAFKNEVGVLR*ACVNYSFPEKEVIFIS	8	7	17	2	3	5		77.0156	58.4473	143.265	19.5756	26.4583	45.0946		92.9094	30.3762		3.05863
TGTGGCAGTGAAAATGTTGAATGTGACAGCACCTACACCTCAGAACAGTTACAAGCCTTCAAAAATGAAGTAGGAGTACTCAGGTGAGCTTGTGTGAATTACTCTTTTCCAGAGAAAGAAGTTATTTTTAT	VAVKMLNVTAPTPQNSYKPSKMK*EYSGELV*ITLFQRKKLFL	8	10	14	25	18	37		77.0156	83.4962	117.983	244.695	158.75	333.7		92.8317	245.715		0.377802
TGTGGCAGTGAAAATGTTGAATGTGACAGCACCTACACCTCCTTCTCTTTCTCAAAACTAGGCAATATATCTATAATTTAGATTGTTTACAAGCCTTCAAAAATGAAGTAGGAGTACTCAGGTGAGCTTGT	VAVKMLNVTAPTPPSLSQN*AIYL*FRLFTSLQK*SRSTQVSL	0	0	33	0	0	0		0	0	278.103	0	0	0		92.7011	0		-1
TGTGGCAGTGAAAATGTTGAATGTGACAGCACCTACACTAAGCCTTCAAAAATGAAGTAGGAGTACTCAGGTGAGCTTGTGTGAATTACTCTTTTCCAGAGAAAGAAGTTATTTTTATTAGCTCCTGGTTC	VAVKMLNVTAPTLSLQK*SRSTQVSLCELLFSRERSYFY*LLV	0	33	0	4	2	0		0	275.537	0	39.1512	17.6389	0		91.8458	18.93		4.85186
TGTGGCAGTGAAAATGTTGAATGTGACAGCACCTACACCTCAGCACCTACAAGCCTTCAAAAATGAAGTAGGAGTACTCAGGTGAGCTTGTGTGAATTACTCTTTTCCAGAGAAAGAAGTTATTTTTATTA	VAVKMLNVTAPTPQHLQAFKNEVGVLR*ACVNYSFPEKEVIFI	12	7	12	53	12	40		115.523	58.4473	101.128	518.753	105.833	360.757		91.6997	328.448		0.279191
TGTGGCAGTGAAAATGTTGAATGTGACAGCACCTACACCTCAGTTACAAGCCTTCAAAAATGAAGTAGGAGTACTCAGGTGAGCTTGTGTGAATTACTCTTTTCCAGATAAAGAAGTTATTTTTATTAGCT	VAVKMLNVTAPTPQLQAFKNEVGVLR*ACVNYSFPDKEVIFIS	5	18	9	4	2	9		48.1348	150.293	75.8463	39.1512	17.6389	81.1703		91.4247	45.9868		1.98807
TGTGGCAGTGAAAATGTTGAATGTGACAGCACCTACACCTCCAGTTACAAGCCTTCAAAAATGAGGTAGGAGTACTCAGGTGAGCTTGTGTGAATTACTCTTTTCCAGAGAAAGAAGTTATTTTTATTAGC	VAVKMLNVTAPTPPVTSLQK*GRSTQVSLCELLFSRERSYFY*	10	11	10	10	17	38		96.2696	91.8458	84.2737	97.878	149.93	342.719		90.7963	196.842		0.461264
TGTGGCAGTGAAAATGTTGAATGTGACAGCACCTAAGTTACAAGCCTTCAAAAATGAAGTAGGAGTACTCAGGTGAGCTTGTGTGAATTACTCTTTTCCAGAGAAAGAAGTTATTTTTATTAGCTCCTGGT	VAVKMLNVTAPKLQAFKNEVGVLR*ACVNYSFPEKEVIFISSW	8	7	16	1	8	6		77.0156	58.4473	134.838	9.7878	70.5554	54.1135		90.1003	44.8189		2.01032
TGTGGCAGTGAAAATGTTGAATGTGACAGCACCTACACCTCAGCAGTTACAAGCCTTCAGAAATGAAGTAGGAGTACTCAGGTGAGCTTGTGTGAATTACTCTTTTCCAGAGAAAGAAGTTATTTTTATTA	VAVKMLNVTAPTPQQLQAFRNEVGVLR*ACVNYSFPEKEVIFI	8	11	12	295	356	62		77.0156	91.8458	101.128	2887.4	3139.72	559.173		89.9966	2195.43		0.0409927
TGTGGCAGTGAAAATGTTGAAGTAGGAGTACTCAGGTGAGCTTGTGTGAATTACTCTTTTCCAGAGAAAGAAGTTATTTTTATTAGCTCCTGGTTCCCAGTGGACAGTGCAGGGGAAAGAATAGTAGAAGA	VAVKMLK*EYSGELV*ITLFQRKKLFLLAPGSQWTVQGKE**K	8	14	9	11	15	35		77.0156	116.895	75.8463	107.666	132.291	315.662		89.9189	185.207		0.485506
TGTGGCAGTGAAAATGTTGAATGTGACAGCACCTACACCTCAGGTGTAGGCTTGTAATAGATTATTACAAGCCTTCAAAAATGAAGTAGGAGTACTCAGGTGAGCTTGTGTGAATTACTCTTTTCCAGAGA	VAVKMLNVTAPTPQV*ACNRLLQAFKNEVGVLR*ACVNYSFPE	0	0	32	0	0	0		0	0	269.676	0	0	0		89.8919	0		-1
TGTGGCAGTGAAAATGTTGAATGTAACTACTGAGGTTACAAGCCTTCAAAAATGAAGTAGGAGTACTCAGGTGAGCTTGTGTGAATTACTCTTTTCCAGAGAAAGAAGTTATTTTTATTAGCTCCTGGTTC	VAVKMLNVTTEVTSLQK*SRSTQVSLCELLFSRERSYFY*LLV	0	0	32	0	0	0		0	0	269.676	0	0	0		89.8919	0		-1
TGTGGCAGTGAAAATGTTGAATACAAGCCTTCAAAAATGAAGTAGGAGTACTCAGGTGAGCTTGTGTGAATTACTCTTTTCCAGAGAAAGAAGTTATTTTTATTAGCTCCTGGTTCCCAGTGGACAGTGCA	VAVKMLNTSLQK*SRSTQVSLCELLFSRERSYFY*LLVPSGQC	28	0	0	1	0	3		269.555	0	0	9.7878	0	27.0568		89.8516	12.2815		7.316
TGTGGCAGTGAAAATGTTGAATGTGAGAAGTTTACAAGCCTTCAAAAATGAAGTAGGAGTACTCAGGTGAGCTTGTGTGAATTACTCTTTTCCAGAGAAAGAAGTTATTTTTATTAGCTCCTGGTTCCCAG	VAVKMLNVRSLQAFKNEVGVLR*ACVNYSFPEKEVIFISSWFP	28	0	0	0	0	0		269.555	0	0	0	0	0		89.8516	0		-1
TGTGTCAGTGAAAATGTTGAATGTGACAGCACCTACACCTCAGTTACAAGCCTTCAAAAATGAAGTAGGAGTACTCAGGTGAGCTTGTGTGAATTACTCTTTTCCAGAGAAAGAAGTTATTTTTATTAGCT	VSVKMLNVTAPTPQLQAFKNEVGVLR*ACVNYSFPEKEVIFIS	7	15	9	3	3	8		67.3887	125.244	75.8463	29.3634	26.4583	72.1514		89.4931	42.6577		2.09794
TGTGGCAGTGAAAATGTTGAATGTGACAGCACCTAAATGAAGTAGGAGTACTCAGGTGAGCTTGTGTGAATTACTCTTTTCCAGAGAAAGAAGTTATTTTTATTAGCTCCTGGTTCCCAGTGGACAGTGCA	VAVKMLNVTAPK*SRSTQVSLCELLFSRERSYFY*LLVPSGQC	6	14	11	26	23	36		57.7617	116.895	92.7011	254.483	202.847	324.681		89.1191	260.67		0.341884
TGTGGCAGTGAAAATGTTGAATGTGACAGCACCTACAACGAAGGTTACAAGCCTTCAAAAATGAAGTAGGAGTACTCAGGTGAGCTTGTGTGAATTACTCTTTTCCAGAGAAAGAAGTTATTTTTATTAGC	VAVKMLNVTAPTTKVTSLQK*SRSTQVSLCELLFSRERSYFY*	0	32	0	0	0	0		0	267.188	0	0	0	0		89.0626	0		-1
TGTGGCAGTGAAAATGTTGAATGTGACAGCACCTACACCTCAGGAAGTAGGAGTACTCAGGTGAGCTTGTGTGAATTACTCTTTTCCAGAGAAAGAAGTTATTTTTATTAGCTCCTGGTTCCCAGTGGACA	VAVKMLNVTAPTPQEVGVLR*ACVNYSFPEKEVIFISSWFPVD	5	21	5	14	19	30		48.1348	175.342	42.1368	137.029	167.569	270.568		88.5378	191.722		0.461803
TGTGGCAGTGAAAATGTTGAATGTGACAGCACCTACACTTACAAGCCTTCAAAAATGAAGTAGGAGTACTCAGGTGAGCTTGTGTGAATTACTCTTTTCCAGAGAAAGAAGTTATTTTTATTAGCTCCTGG	VAVKMLNVTAPTLTSLQK*SRSTQVSLCELLFSRERSYFY*LL	4	15	12	8	13	37		38.5078	125.244	101.128	78.3024	114.653	333.7		88.2935	175.552		0.502949
TGTGGCAGTGAAAATGTTGAATGTGACAGCACCTACACCTCATTTTGAAGTTACAAGCCTTCAAAAATGAAGTAGGAGTACTCAGGTGAGCTTGTGTGAATTACTCTTTTCCAGAGAAAGAAGTTATTTTT	VAVKMLNVTAPTPHFEVTSLQK*SRSTQVSLCELLFSRERSYF	2	0	29	0	1	6		19.2539	0	244.394	0	8.81943	54.1135		87.8825	20.9777		4.18934
TGTGGCAGTGAAAATGTTGAATGTGACAGCACCTACACCTCAGTTAGAAGCCTTCAAAAATGAAGTAGGAGTACTCAGGTGAGCTTGTGTGAATTACTCTTTTCCAGAGAAAGAAGTTATTTTTATTAGCT	VAVKMLNVTAPTPQLEAFKNEVGVLR*ACVNYSFPEKEVIFIS	2	3	26	2	3	5		19.2539	25.0488	219.112	19.5756	26.4583	45.0946		87.8048	30.3762		2.89058
TGTGGCAGTGAAAATGTTGAATGTGACAGCACCTACACCTCCAGTTACAAGCCTTCAAAGATGAAGTAGGAGTACTCAGGTGAGCTTGTGTGAATTACTCTTTTCCAGAGAAAGAAGTTATTTTTATTAGC	VAVKMLNVTAPTPPVTSLQR*SRSTQVSLCELLFSRERSYFY*	9	7	14	17	15	42		86.6426	58.4473	117.983	166.393	132.291	378.795		87.691	225.826		0.388312
TGTGGCAGTGAAAATGTTGAATGTGACAGCACCTACACCTCAGTTACAAGCCTTCAAAAATGAAGTAGGAGTACTCAGGTGAGCTTGTGTGAATTACTCTTTTCCAGAGATAGAAGTTATTTTTATTAGCT	VAVKMLNVTAPTPQLQAFKNEVGVLR*ACVNYSFPEIEVIFIS	9	11	10	3	1	4		86.6426	91.8458	84.2737	29.3634	8.81943	36.0757		87.5874	24.7528		3.53848
TGTGGCAGTGAAAATGTTGAATGTGACAGCACCTACACCTCAGCACCTACACCTACAAGCCTTCAAAAATGAAGTAGGAGTACTCAGGTGAGCTTGTGTGAATTACTCTTTTCCAGAGAAAGAAGTTATTT	VAVKMLNVTAPTPQHLHLQAFKNEVGVLR*ACVNYSFPEKEVI	1	3	27	1	0	5		9.62696	25.0488	227.539	9.7878	0	45.0946		87.4049	18.2941		4.77776
TGTGGCAGTGAAAATGTTGAATGTGACAGCACCTACACCTCCAGTTACAAGCCTTCAAGAATGAAGTAGGAGTACTCAGGTGAGCTTGTGTGAATTACTCTTTTCCAGAGAAAGAAGTTATTTTTATTAGC	VAVKMLNVTAPTPPVTSLQE*SRSTQVSLCELLFSRERSYFY*	8	11	11	15	15	33		77.0156	91.8458	92.7011	146.817	132.291	297.624		87.1875	192.244		0.453524
TGTGGCAGTGAAAATGTTGAATGTGACAGCACCTACACCTCAGTTACAAGCCTTCAAAAATGAAGTAGGAGTACTCAGGTGAGCTTGTGTGAATTACTGTTTTCCAGAGAAAGAAGTTATTTTTATTAGCT	VAVKMLNVTAPTPQLQAFKNEVGVLR*ACVNYCFPEKEVIFIS	0	1	30	0	1	1		0	8.34962	252.821	0	8.81943	9.01892		87.0569	5.94612		14.641
TGTGGCAGTGAAAATGTTGAATGTGACAGCACCTACACCTTACAGTTACAAGCCTTCAAAAATGAAGTAGGAGTACTCAGGTGAGCTTGTGTGAATTACTCTTTTCCAGAGAAAGAAGTTATTTTTATTAG	VAVKMLNVTAPTPYSYKPSKMK*EYSGELV*ITLFQRKKLFLL	1	19	11	1	9	11		9.62696	158.643	92.7011	9.7878	79.3749	99.2081		86.9902	62.7903		1.38541
TGTGGCAGTGAAAATGTTGAATGTGACAGCACCTACACCTCAAAGTTACAAGCCTTCAAAAATGAAGTAGGAGTACTCAGGTGAGCTTGTGTGAATTACTCTTTTCCAGAGAAAGAAGTTATTTTTATTAG	VAVKMLNVTAPTPQSYKPSKMK*EYSGELV*ITLFQRKKLFLL	21	4	3	21	6	22		202.166	33.3985	25.2821	205.544	52.9166	198.416		86.9489	152.292		0.570934
TGTGGCAGTGAAAATGTTGAATGTGACAGCACCTACACCTCAGTTACAAGCCTTCAAAATTGAAGTAGGAGTACTCAGGTGAGCTTGTGTGAATTACTCTTTTCCAGAGAAAGAAGTTATTTTTATTAGCT	VAVKMLNVTAPTPQLQAFKIEVGVLR*ACVNYSFPEKEVIFIS	7	8	15	2	1	11		67.3887	66.7969	126.411	19.5756	8.81943	99.2081		86.8654	42.5344		2.04224
TGTGGCAGTGAAAATGTTGAATGTGACAGCGTTACAAGCCTTCAAAAATGAAGTAGGAGTACTCAGGTGAGCTTGTGTGAATTACTCTTTTCCAGAGAAAGAAGTTATTTTTATTAGCTCCTGGTTCCCAG	VAVKMLNVTALQAFKNEVGVLR*ACVNYSFPEKEVIFISSWFP	6	1	23	0	0	5		57.7617	8.34962	193.829	0	0	45.0946		86.6469	15.0315		5.76434
TGTGGCAGTGAAAATGTTGAATGTGACAGCACCTACACTTTTTGAGTTACAAGCCTTCAAAAATGAAGTAGGAGTACTCAGGTGAGCTTGTGTGAATTACTCTTTTCCAGAGAAAGAAGTTATTTTTATTA	VAVKMLNVTAPTLFELQAFKNEVGVLR*ACVNYSFPEKEVIFI	27	0	0	1	0	0		259.928	0	0	9.7878	0	0		86.6426	3.2626		26.5563
TGTGGCAGTGAAAATGTTGAATGTGACAGCACCTACACCTCAGGTGCTTACAAGCCTTCAAAAATGAAGTAGGAGTACTCAGGTGAGCTTGTGTGAATTACTCTTTTCCAGAGAAAGAAGTTATTTTTATT	VAVKMLNVTAPTPQVLTSLQK*SRSTQVSLCELLFSRERSYFY	27	0	0	0	0	1		259.928	0	0	0	0	9.01892		86.6426	3.00631		28.8203
TGTGGCAGTGAAAATGTTGAATGTGACAGCACCATTACAAGCCTTCAAAAATGAAGTAGGAGTACTCAGGTGAGCTTGTGTGAATTACTCTTTTCCAGAGAAAGAAGTTATTTTTATTAGCTCCTGGTTCC	VAVKMLNVTAPLQAFKNEVGVLR*ACVNYSFPEKEVIFISSWF	26	0	1	0	0	0		250.301	0	8.42737	0	0	0		86.2427	0		-1
TGTGGCAGTGAAAATGTTGAATGTGACAGCACCTACACCTCAGCAGCAAGCCTTCAAAAATGAAGTAGGAGTACTCAGGTGAGCTTGTGTGAATTACTCTTTTCCAGAGAAAGAAGTTATTTTTATTAGCT	VAVKMLNVTAPTPQQQAFKNEVGVLR*ACVNYSFPEKEVIFIS	25	1	1	1	2	10		240.674	8.34962	8.42737	9.7878	17.6389	90.1892		85.817	39.2053		2.18891
TGTGGCAGTGAAAATGTTGAATGTGACAGCACCTACACCTCAGTTACAAGCCTTCAAAAATGAAGTAGGAGTACTCAGGTGAGCTTGTGTGAATAACTCTTTTCCAGAGAAAGAAGTTATTTTTATTAGCT	VAVKMLNVTAPTPQLQAFKNEVGVLR*ACVNNSFPEKEVIFIS	10	8	11	5	3	5		96.2696	66.7969	92.7011	48.939	26.4583	45.0946		85.2558	40.164		2.12269
TGTGGCAGTGAAAATGTTGAATGTGACAGCACCACAGTTACAAGCCTTCAAAAATGAAGTAGGAGTACTCAGGTGAGCTTGTGTGAATTACTCTTTTCCAGAGAAAGAAGTTATTTTTATTAGCTCCTGGT	VAVKMLNVTAPQLQAFKNEVGVLR*ACVNYSFPEKEVIFISSW	17	8	3	9	19	13		163.658	66.7969	25.2821	88.0902	167.569	117.246		85.2458	124.302		0.685797
TGTGGCAGTGAAAATGTTGAATGTGACAGCACCTACACCTCAGTTACAAGCCTTCAAAAATGAAGTAGGAGTACTCAGGTGAGCTTGTGTGAATTACTCTTTTCCCGAGAAAGAAGTTATTTTTATTAGCT	VAVKMLNVTAPTPQLQAFKNEVGVLR*ACVNYSFPEKEVIFIS	9	9	11	5	2	4		86.6426	75.1465	92.7011	48.939	17.6389	36.0757		84.8301	34.2179		2.47912
TGTGGCAGTGAAAATGTTGAATGTGACAGCACCTACACCTCAGCAAAAATGAAGTAGGAGTACTCAGGTGAGCTTGTGTGAATTACTCTTTTCCAGAGAAAGAAGTTATTTTTATTAGCTCCTGGTTCCCA	VAVKMLNVTAPTPQQK*SRSTQVSLCELLFSRERSYFY*LLVP	8	7	14	15	14	50		77.0156	58.4473	117.983	146.817	123.472	450.946		84.482	240.412		0.351406
TGTGGCAGTGAAAATGTTGAATGTGACAGCACCTACACCTCAGTTACAAGCCTTCAAAAATGAAGTAGGAGTACTCAGGTGAGCTTGTGTGAATTACTCATTTCCAGAGAAAGAAGTTATTTTTATTAGCT	VAVKMLNVTAPTPQLQAFKNEVGVLR*ACVNYSFPEKEVIFIS	8	8	13	5	1	2		77.0156	66.7969	109.556	48.939	8.81943	18.0378		84.4561	25.2654		3.34275
TGTGGCAGTGAAAATGTTGAATGTGACAGCACCTACAAAACAGTTACAAGCCTTCAAAAATGAAGTAGGAGTACTCAGGTGAGCTTGTGTGAATTACTCTTTTCCAGAGAAAGAAGTTATTTTTATTAGCT	VAVKMLNVTAPTKQLQAFKNEVGVLR*ACVNYSFPEKEVIFIS	8	10	11	6	1	9		77.0156	83.4962	92.7011	58.7268	8.81943	81.1703		84.4043	49.5722		1.70265
TGTGGCAGTGAAAATGTTGAATGTGACAGCACCTACACCTCAACTAGGCTAGTTACAAGCCTTCAAAAATGAAGTAGGAGTACTCAGGTGAGCTTGTGTGAATTACTCTTTTCCAGAGAAAGAAGTTATTT	VAVKMLNVTAPTPQLG*LQAFKNEVGVLR*ACVNYSFPEKEVI	0	0	30	0	0	0		0	0	252.821	0	0	0		84.2737	0		-1
TGTGGCAGTGAAAATGTTGAATGTGACAGCACCTACACCTCAGTTACACGCCTTCAAAAATGAAGTAGGAGTACTCAGGTGAGCTTGTGTGAATTACTCTTTTCCAGAGAAAGAAGTTATTTTTATTAGCT	VAVKMLNVTAPTPQLHAFKNEVGVLR*ACVNYSFPEKEVIFIS	7	6	16	4	1	3		67.3887	50.0977	134.838	39.1512	8.81943	27.0568		84.1081	25.0091		3.3631
TGTGGCAGTGAAAATGTTGAATGTGACAGCACCTACACCTCAGTTACAAGCCTTCACAAATGAAGTAGGAGTACTCAGGTGAGCTTGTGTGAATTACTCTTTTCCAGAGAAAGAAGTTATTTTTATTAGCT	VAVKMLNVTAPTPQLQAFTNEVGVLR*ACVNYSFPEKEVIFIS	14	8	6	1	1	5		134.777	66.7969	50.5642	9.7878	8.81943	45.0946		84.0462	21.2339		3.9581
TGTGGCAGTGAAAATGTTGAATGTGACAGCACCTACAGCAGTTACAAGCCTTCAAAAATGAAGTAGGAGTACTCAGGTGAGCTTGTGTGAATTACTCTTTTCCAGAGAAAGAAGTTATTTTTATTAGCTCC	VAVKMLNVTAPTAVTSLQK*SRSTQVSLCELLFSRERSYFY*L	20	3	4	17	18	27		192.539	25.0488	33.7095	166.393	158.75	243.511		83.7658	189.551		0.441917
TGTGGCAGTGAAAATGTTGAATGTGACAGCACCTACACCTCAGTATGAAGTAGGAGTACTCAGGTGAGCTTGTGTGAATTACTCTTTTCCAGAGAAAGAAGTTATTTTTATTAGCTCCTGGTTCCCAGTGG	VAVKMLNVTAPTPQYEVGVLR*ACVNYSFPEKEVIFISSWFPV	0	30	0	3	3	1		0	250.488	0	29.3634	26.4583	9.01892		83.4962	21.6135		3.86314
TGTGGCAGTGAAAATGTTGAATGTGACAGCACCTACACCTCAGATTCAAGCCTTCAAAAATGAAGTAGGAGTACTCAGGTGAGCTTGTGTGAATTACTCTTTTCCAGAGAAAGAAGTTATTTTTATTAGCT	VAVKMLNVTAPTPQIQAFKNEVGVLR*ACVNYSFPEKEVIFIS	0	30	0	0	0	1		0	250.488	0	0	0	9.01892		83.4962	3.00631		27.7737
TGTGGCAGTGAAAATGTTGAATGTGACAGCACCTTCACATTTGAAGGCTTCACACAAGCCTTCAAAAATGAAGTAGGAGTACTCAGGTGAGCTTGTGTGAATTACTCTTTTCCAGAGAAAGAAGTTATTTT	VAVKMLNVTAPSHLKASHKPSKMK*EYSGELV*ITLFQRKKLF	26	0	0	0	0	0		250.301	0	0	0	0	0		83.4336	0		-1
TGTGGCAGTGAAAATGTTGAATGTGACAGCACCTACCACTGACAGCCTTCAAAAATGAAGTAGGAGTACTCAGGTGAGCTTGTGTGAATTACTCTTTTCCAGAGAAAGAAGTTATTTTTATTAGCTCCTGG	VAVKMLNVTAPTTDSLQK*SRSTQVSLCELLFSRERSYFY*LL	26	0	0	0	0	0		250.301	0	0	0	0	0		83.4336	0		-1
TGTGGCAGAGAAAGAAGTTATTTTTATTAGCTCCTGGTTCCCAGTGGACAGTGCAGGGGAAAGAATAGTAGAAGATCGGAAGAGCACACGTCTGAACTCCAGTCACGGCTCAATATCTCGTATGCCGTCTT	VAEKEVIFISSWFPVDSAGERIVEDRKSTRLNSSHGSISRMPS	26	0	0	0	0	0		250.301	0	0	0	0	0		83.4336	0		-1
TGTGGCAGTGAAAATGTTGAATGTGACAGCACCTAAAAATGAAGTAGGAGTACTCAGGTGAGCTTGTGTGAATTACTCTTTTCCAGAGAAAGAAGTTATTTTTATTAGCTCCTGGTTCCCAGTGGACAGTG	VAVKMLNVTAPKNEVGVLR*ACVNYSFPEKEVIFISSWFPVDS	25	1	0	7	0	3		240.674	8.34962	0	68.5146	0	27.0568		83.0078	31.8571		2.60563
TGTGGCAGTGAAAATGTTGAATGTGACAGCACCTACACAGTTACAAGCCTTCAAAAATGAAATAGGAGTACTCAGGTGAGCTTGTGTGAATTACTCTTTTCCAGAGAAAGAAGTTATTTTTATTAGCTCCT	VAVKMLNVTAPTQLQAFKNEIGVLR*ACVNYSFPEKEVIFISS	4	16	9	1	0	7		38.5078	133.594	75.8463	9.7878	0	63.1325		82.6493	24.3068		3.40026
TGTGGCAGTGAAAATGTTGAATGTGACAGCACCTACACCTCAGAGCCTTCAAAAATGAAGTAGGAGTACTCAGGTGAGCTTGTGTGAATTACTCTTTTCCAGAGAAAGAAGTTATTTTTATTAGCTCCTGG	VAVKMLNVTAPTPQSLQK*SRSTQVSLCELLFSRERSYFY*LL	10	9	9	33	19	66		96.2696	75.1465	75.8463	322.997	167.569	595.249		82.4208	361.938		0.22772
TGTGGCAGTGAAAATGTTGAATGTGACAGCACCTACACCTCCAGTTACAAGCCTTCAAAAATGGAGTAGGAGTACTCAGGTGAGCTTGTGTGAATTACTCTTTTCCAGAGAAAGAAGTTATTTTTATTAGC	VAVKMLNVTAPTPPVTSLQKWSRSTQVSLCELLFSRERSYFY*	10	9	9	17	13	33		96.2696	75.1465	75.8463	166.393	114.653	297.624		82.4208	192.89		0.427295
TGTGGCAGTGAAAATGTTGAATGTGACAGCACCTAACAGTTACAAGCCTTCAAAAATGAAGTAGGAGTACTCAGGTGAGCTTGTGTGAATTACTCTTTTCCAGAGAAAGAAGTTATTTTTATTAGCTCCTG	VAVKMLNVTAPNSYKPSKMK*EYSGELV*ITLFQRKKLFLLAP	15	4	8	7	5	15		144.404	33.3985	67.4189	68.5146	44.0972	135.284		81.7406	82.6319		0.989214
TGTGGCAGTGAAAATGTTGAATGTGACAGCACCTACACCTCAGGCTTGTTACAAGCCTTCAAAAATGAAGTAGGAGTACTCAGGTGAGCTTGTGTGAATTACTCTTTTCCAGAGAAAGAAGTTATTTTTAT	VAVKMLNVTAPTPQACYKPSKMK*EYSGELV*ITLFQRKKLFL	15	5	7	6	8	37		144.404	41.7481	58.9916	58.7268	70.5554	333.7		81.7147	154.327		0.529489
TGTGGCAGTGAAAATGTTGAATGTGACAGCACCTGAAGTAGGAGTACTCAGGTGAGCTTGTGTGAATTACTCTTTTCCAGAGAAAGAAGTTATTTTTATTAGCTCCTGGTTCCCAGTGGACAGTGCAGGGG	VAVKMLNVTAPEVGVLR*ACVNYSFPEKEVIFISSWFPVDSAG	1	6	22	10	6	35		9.62696	50.0977	185.402	97.878	52.9166	315.662		81.7089	155.486		0.525508
TGTGGCAGTGAAAATGTTGAATGTGACAGCACCTACACAGTTACAAGCCTTCAAAAATAAAGTAGGAGTACTCAGGTGAGCTTGTGTGAATTACTCTTTTCCAGAGAAAGAAGTTATTTTTATTAGCTCCT	VAVKMLNVTAPTQLQAFKNKVGVLR*ACVNYSFPEKEVIFISS	8	8	12	3	4	13		77.0156	66.7969	101.128	29.3634	35.2777	117.246		81.647	60.629		1.34666
TGTGGCAGTGAAAATGTTGAATGTGACAGCACCTACACAGCAGTTACAAGCCTTCAAAAATGAAGTAGGAGTACTCAGGTGAGCTTGTGTGAATTACTCTTTTCCAGAGAAAGAAGTTATTTTTATTAGCT	VAVKMLNVTAPTQQLQAFKNEVGVLR*ACVNYSFPEKEVIFIS	8	12	8	5	4	9		77.0156	100.195	67.4189	48.939	35.2777	81.1703		81.5433	55.129		1.47914
TGTGGCAGTGAAAATGTTGAATGTGACAGCACCTACACCTCAGTTACAAGCCTTCAAAAATGAAGTAGGAGTACTCAGGTGAGCTTGTGTGAATTACTCTTTTCCAGAGAAAGAAGTTATTTTTATAAGCT	VAVKMLNVTAPTPQLQAFKNEVGVLR*ACVNYSFPEKEVIFIS	7	9	12	3	4	8		67.3887	75.1465	101.128	29.3634	35.2777	72.1514		81.2212	45.5975		1.78126
TGTGGCAGTGAAAATGTTGAATGTGACAGCACCTACACCTCAGTTACAAGCCTTCAAAAATGAAGTAGGAGTACTCAGGTGAGCTTGTGTGAATTACTCTTTTCCAGAGAATGAAGTTATTTTTATTAGCT	VAVKMLNVTAPTPQLQAFKNEVGVLR*ACVNYSFPENEVIFIS	7	10	11	4	3	5		67.3887	83.4962	92.7011	39.1512	26.4583	45.0946		81.1953	36.9014		2.20033
TGTGGCAGTGAAAATGTTGAATGTGACAGCACCTACACCTCAGTTACAAGCCTTCAAAAATGAAGTAGGAGTACTCAGGTGAGCTTGTGTGAATTACTCTTTTCCAGAGAAAGATGTTATTTTTATTAGCT	VAVKMLNVTAPTPQLQAFKNEVGVLR*ACVNYSFPEKDVIFIS	7	11	10	1	2	9		67.3887	91.8458	84.2737	9.7878	17.6389	81.1703		81.1694	36.199		2.24231
TGTGGCAGTGAAAATGTTGAATGTGACAGCACCTACACCTCAGTTACAATCCTTCAAAAATGAAGTAGGAGTACTCAGGTGAGCTTGTGTGAATTACTCTTTTCCAGAGAAAGAAGTTATTTTTATTAGCT	VAVKMLNVTAPTPQLQSFKNEVGVLR*ACVNYSFPEKEVIFIS	12	10	5	2	3	4		115.523	83.4962	42.1368	19.5756	26.4583	36.0757		80.3855	27.3699		2.93701
TGTGGCAGTGAAAATGTTGAATGTGACAGCACCTACACATTAGCTCCTGGTTCCCAGTGGACAGTGCAGGGGAAAGAATAGTAGAAGATCGGAAGAGCACACGTCTGAACTCCAGTCACGGTCCACGATCT	VAVKMLNVTAPTH*LLVPSGQCRGKNSRRSEEHTSELQSRSTI	25	0	0	0	0	0		240.674	0	0	0	0	0		80.2246	0		-1
TGTGGCAGTGAAAATGTTGAATGTGACAGCACCTACACCTCAAAAGCCTTCAAAATGAAGTAGGAGTACTCAGGTGAGCTTGTGTGAATTACTCTTTTCCAGAGAAAGAAGTTATTTTTATTAGCTCCTGG	VAVKMLNVTAPTPQKPSK*SRSTQVSLCELLFSRERSYFY*LL	24	1	0	0	1	1		231.047	8.34962	0	0	8.81943	9.01892		79.7988	5.94612		13.4203
TGTGGCAGTGAAAATGTTGAATGTGACAGCACCTATACAAGCCTTCAAAAATGAAGTAGGAGTACTCAGGTGAGCTTGTGTGAATTACTCTTTTCCAGAGAAAGAAGTTATTTTTATTAGCTCCTGGTTCC	VAVKMLNVTAPIQAFKNEVGVLR*ACVNYSFPEKEVIFISSWF	23	0	2	3	6	1		221.42	0	16.8547	29.3634	52.9166	9.01892		79.4249	30.433		2.60983
TGTGGCAGTGAAAATGTTGAATGTGACTGCACCTACACCTCAGTTACAAGCCTTCAAAAATGAAGTAGGAGTACTCAGGTGAGCTTGTGTGAATTACTCTTTTCCAGAGAAAGAAGTTATTTTTATTAGCT	VAVKMLNVTAPTPQLQAFKNEVGVLR*ACVNYSFPEKEVIFIS	9	8	10	6	2	3		86.6426	66.7969	84.2737	58.7268	17.6389	27.0568		79.2377	34.4741		2.29847
TGTGGCAGTGAAAATGTTGAATGTGACAGCACCTACACCTCAGCAGTTACAAGCCTTCAAAGATGAAGTAGGAGTACTCAGGTGAGCTTGTGTGAATTACTCTTTTCCAGAGAAAGAAGTTATTTTTATTA	VAVKMLNVTAPTPQQLQAFKDEVGVLR*ACVNYSFPEKEVIFI	2	15	11	259	317	47		19.2539	125.244	92.7011	2535.04	2795.76	423.889		79.0664	1918.23		0.0412184
TGTGGCAGTGAAAATGTTGAATGTGACAGCACCTACACCTCAGGTTATTTTTATTAGCTCCTGGTTCCCAGTGGACAGTGCAGGGGAAAGAATAGTAGAAGATCGGAAGAGCACACGTCTGAACTCCAGTC	VAVKMLNVTAPTPQVIFISSWFPVDSAGERIVEDRKSTRLNSS	0	28	0	0	1	5		0	233.789	0	0	8.81943	45.0946		77.9297	17.9713		4.33633
TGTGGCAGTGAAAATGTTGAATGTGACAGCACCTACACCTCAGTTACAAGCCTTCAGTTACAAGCCTTCAAAAATGAAGTAGGAGTACTCAGGTGAGCTTGTGTGAATTACTCTTTTCCAGAGAAAGAAGT	VAVKMLNVTAPTPQLQAFSYKPSKMK*EYSGELV*ITLFQRKK	5	0	22	3	5	8		48.1348	0	185.402	29.3634	44.0972	72.1514		77.8456	48.5373		1.60383
TGTGGCAGTGAAAATGTTGAATGTGACAGCACCTACCTTCAAAAATGAAGTAGGAGTACTCAGGTGAGCTTGTGTGAATTACTCTTTTCCAGAGAAAGAAGTTATTTTTATTAGCTCCTGGTTCCCAGTGG	VAVKMLNVTAPTFKNEVGVLR*ACVNYSFPEKEVIFISSWFPV	12	0	14	16	14	26		115.523	0	117.983	156.605	123.472	234.492		77.8355	171.523		0.453791
TGTGGCAGTGAAAATGTTGAATGTGAGTTACAAGCCTTCAAAAATGAAGTAGGAGTACTCAGGTGAGCTTGTGTGAATTACTCTTTTCCAGAGAAAGAAGTTATTTTTATTAGCTCCTGGTTCCCAGTGGA	VAVKMLNVSYKPSKMK*EYSGELV*ITLFQRKKLFLLAPGSQW	24	0	0	2	3	7		231.047	0	0	19.5756	26.4583	63.1325		77.0156	36.3888		2.11647
TGTGGCAGTGAAAATGTTGAATGTGACAGCACCTTCAAAAATGTTACAAGCCTTCAAAAATGAAGTAGGAGTACTCAGGTGAGCTTGTGTGAATTACTCTTTTCCAGAGAAAGAAGTTATTTTTATTAGCT	VAVKMLNVTAPSKMLQAFKNEVGVLR*ACVNYSFPEKEVIFIS	24	0	0	3	0	2		231.047	0	0	29.3634	0	18.0378		77.0156	15.8004		4.87428
TGTGGCAGTGAAAATGTTGAATGTGACAGCACACCTACAAGCCTTCAAAAATGAAGTAGGAGTACTCAGGTGAGCTTGTGTGAATTACTCTTTTCCAGAGAAAGAAGTTATTTTTATTAGCTCCTGGTTCC	VAVKMLNVTAHLQAFKNEVGVLR*ACVNYSFPEKEVIFISSWF	24	0	0	0	0	0		231.047	0	0	0	0	0		77.0156	0		-1
TGTGGCAGTGAAAATTTTGAATGTGACAGCACCTACACCTCAGTTACAAGCCTTCAAAAATGAAGTAGGAGTACTCAGGTGAGCTTGTGTGAATTACTCTTTTCCAGAGAAAGAAGTTATTTTTATTAGCT	VAVKILNVTAPTPQLQAFKNEVGVLR*ACVNYSFPEKEVIFIS	10	8	8	2	0	2		96.2696	66.7969	67.4189	19.5756	0	18.0378		76.8285	12.5378		6.12774
TGTGGCAGTGAAAATGTTTAATGTGACAGCACCTACACCTCAGTTACAAGCCTTCAAAAATGAAGTAGGAGTACTCAGGTGAGCTTGTGTGAATTACTCTTTTCCAGAGAAAGAAGTTATTTTTATTAGCT	VAVKMFNVTAPTPQLQAFKNEVGVLR*ACVNYSFPEKEVIFIS	9	6	11	2	1	3		86.6426	50.0977	92.7011	19.5756	8.81943	27.0568		76.4804	18.4839		4.13767
TGTGGCAGTGAAAATGTTGAAAAAATGAAGTAGGAGTACTCAGGTGAGCTTGTGTGAATTACTCTTTTCCAGAGAAAGAAGTTATTTTTATTAGCTCCTGGTTCCCAGTGGACAGTGCAGGGGAAAGAATA	VAVKMLKK*SRSTQVSLCELLFSRERSYFY*LLVPSGQCRGKN	0	0	27	0	1	0		0	0	227.539	0	8.81943	0		75.8463	2.93981		25.7997
TGTGGCAGTGAAAATGTTGAATGTGACAGCACCTACACCTCAGGGAGTACTCAGGTGAGCTTGTGTGAATTACTCTTTTCCAGAGAAAGAAGTTATTTTTATTAGCTCCTGGTTCCCAGTGGACAGTGCAG	VAVKMLNVTAPTPQGVLR*ACVNYSFPEKEVIFISSWFPVDSA	0	1	26	7	1	0		0	8.34962	219.112	68.5146	8.81943	0		75.8204	25.778		2.94128
TGTGGCAGTGAAAATGTTGAATGTGACAGCACCTACACCTACTTCAAAAATGAAGTAGGAGTACTCAGGTGAGCTTGTGTGAATTACTCTTTTCCAGAGAAAGAAGTTATTTTTATTAGCTCCTGGTTCCC	VAVKMLNVTAPTPTSKMK*EYSGELV*ITLFQRKKLFLLAPGS	0	5	22	5	3	11		0	41.7481	185.402	48.939	26.4583	99.2081		75.7167	58.2018		1.30093
TGTGGCAGTGAAAATGTTGAATGTGACAGCACCTACACCTCAGTTACAAGCCTTCAAAAATGAAGTAGGAGTACTCAGGTGAGCATGTGTGAATTACTCTTTTCCAGAGAAAGAAGTTATTTTTATTAGCT	VAVKMLNVTAPTPQLQAFKNEVGVLR*ACVNYSFPEKEVIFIS	7	11	8	2	1	4		67.3887	91.8458	67.4189	19.5756	8.81943	36.0757		75.5511	21.4902		3.5156
TGTGGCAGTGAAAATGCCTTCAAAAATGAAGTAGGAGTACTCAGGTGAGCTTGTGTGAATTACTCTTTTCCAGAGAAAGAAGTTATTTTTATTAGCTCCTGGTTCCCAGTGGACAGTGCAGGGGAAAGAAT	VAVKMPSKMK*EYSGELV*ITLFQRKKLFLLAPGSQWTVQGKE	7	12	7	5	4	27		67.3887	100.195	58.9916	48.939	35.2777	243.511		75.5252	109.243		0.691354
TGTGGCAGTGAAAATGTTGAATGCGACAGAGTTACAAGCCTTCAAAAATGAAGTAGGAGTACTCAGGTGAGCTTGTGTGAATTACTCTTTTCCAGAGAAAGAAGTTATTTTTATTAGCTCCTGGTTCCCAG	VAVKMLNATELQAFKNEVGVLR*ACVNYSFPEKEVIFISSWFP	0	27	0	0	0	0		0	225.44	0	0	0	0		75.1465	0		-1
TGTGGCAGTGAAAATGTTGAATGTGACAGCACCTACACCTCAGCTTGTAACAAGCCTTCAAAAATGAAGTAGGAGTACTCAGGTGAGCTTGTGTGAATTACTCTTTTCCAGAGAAAGAAGTTATTTTTATT	VAVKMLNVTAPTPQLVTSLQK*SRSTQVSLCELLFSRERSYFY	5	20	1	3	4	3		48.1348	166.992	8.42737	29.3634	35.2777	27.0568		74.5181	30.566		2.43795
TGTGGCAGTGAAAATGTTGAATGTGACAGCACTCTTTTCCAGAGAAAGAAGTTATTTTTATTAGCTCCTGGTTCCCAGTGGACAGTGCAGGGGAAAGAATAGTAGAAGATCGGAAGAGCACACGTCTGAAC	VAVKMLNVTALFSRERSYFY*LLVPSGQCRGKNSRRSEEHTSE	3	0	23	9	1	2		28.8809	0	193.829	88.0902	8.81943	18.0378		74.2368	38.3158		1.9375
TGTGGCAGTGAAAATGTTGAATGTGACAGCACCTACACCTCAGTTACAAGCCTTCAAAAATGAAGTAGGAGTACTCAGGTGAGCTTGTGTGAATTACTCTTTTCCAGAGAAATAAGTTATTTTTATTAGCT	VAVKMLNVTAPTPQLQAFKNEVGVLR*ACVNYSFPEK*VIFIS	10	9	6	0	2	5		96.2696	75.1465	50.5642	0	17.6389	45.0946		73.9934	20.9112		3.53847
TGTGGCAGTGAAAATGTTGTTACAAGCCTTCAAAAATGAAGTAGGAGTACTCAGGTGAGCTTGTGTGAATTACTCTTTTCCAGAGAAAGAAGTTATTTTTATTAGCTCCTGGTTCCCAGTGGACAGTGCAG	VAVKMLLQAFKNEVGVLR*ACVNYSFPEKEVIFISSWFPVDSA	9	2	14	13	20	31		86.6426	16.6992	117.983	127.241	176.389	279.587		73.775	194.406		0.37949
TGTGGCAGTGAAAATGTTGAATGTGACAGCACCTACACCTCCAGTTACAAGCCTTCAGAAATGAAGTAGGAGTACTCAGGTGAGCTTGTGTGAATTACTCTTTTCCAGAGAAAGAAGTTATTTTTATTAGC	VAVKMLNVTAPTPPVTSLQK*SRSTQVSLCELLFSRERSYFY*	9	5	11	10	7	36		86.6426	41.7481	92.7011	97.878	61.736	324.681		73.6972	161.432		0.456523
TGTGGCAGTGAAAATGTTGAATGTGACAGCACCTACACCTCAGCAGTCAGTTACAAGCCTTCAAAAATGAAGTAGGAGTACTCAGGTGAGCTTGTGTGAATTACTCTTTTCCAGAGAAAGAAGTTATTTTT	VAVKMLNVTAPTPQQSVTSLQK*SRSTQVSLCELLFSRERSYF	1	1	24	3	1	5		9.62696	8.34962	202.257	29.3634	8.81943	45.0946		73.4111	27.7591		2.64457
TGTGGCAGTGAAAATGTTGAATGTGACAGCACCTTTACAAGCCTTCAAAAATGAAGTAGGAGTACTCAGGTGAGCTTGTGTGAATTACTCTTTTCCAGAGAAAGAAGTTATTTTTATTAGCTCCTGGTTCC	VAVKMLNVTAPLQAFKNEVGVLR*ACVNYSFPEKEVIFISSWF	2	19	5	0	0	2		19.2539	158.643	42.1368	0	0	18.0378		73.3445	6.01261		12.1984
TGTGGCAGTGAAAATGTTGAATGTGACAGCACCTACACCTCAGTTACAAGCCTTCAAAAATGAAGTAGGAGTACTCAGGTGAGCTTGTGTGAATTACTCTTTTCCAGAGAAAGAAGTTCTTTTTATTAGCT	VAVKMLNVTAPTPQLQAFKNEVGVLR*ACVNYSFPEKEVLFIS	8	7	10	1	0	5		77.0156	58.4473	84.2737	9.7878	0	45.0946		73.2455	18.2941		4.00377
TGTGGCAGTGAAAATGTTGAATGTGACAGCACCTACACCTCCGCAGTTACAAGCCTTCAAAAATGAAGTAGGAGTACTCAGGTGAGCTTGTGTGAATTACTCTTTTCCAGAGAAAGAAGTTATTTTTATTA	VAVKMLNVTAPTPPQLQAFKNEVGVLR*ACVNYSFPEKEVIFI	21	0	2	11	8	19		202.166	0	16.8547	107.666	70.5554	171.36		73.0069	116.527		0.626524
TGTGGCAGTGAAAATGTTGAATGTGACAGCACCTACACCTCAGTTACAAGCCTTCAAAATGAAGTTACAAGCCTTCAAAAATGAAGTAGGAGTACTCAGGTGAGCTTGTGTGAATTACTCTTTTCCAGAGA	VAVKMLNVTAPTPQLQAFKMKLQAFKNEVGVLR*ACVNYSFPE	1	23	2	0	0	0		9.62696	192.041	16.8547	0	0	0		72.8409	0		-1
TGTGGCAGTGAAAATGTTGAATGTGACAGCACCCACACAGTTACAAGCCTTCAAAAATGAAGTAGGAGTACTCAGGTGAGCTTGTGTGAATTACTCTTTTCCAGAGAAAGAAGTTATTTTTATTAGCTCCT	VAVKMLNVTAPTQLQAFKNEVGVLR*ACVNYSFPEKEVIFISS	1	25	0	0	0	0		9.62696	208.74	0	0	0	0		72.7891	0		-1
TGTGGCAGTGAAAATGTTGAATGTGACAGCACCTACACCTCTTACAAGCCTTCAAAAATGAAGTAGGAGTACTCAGGTGAGCTTGTGTGAATTACTCTTTTCCAGAGAAAGAAGTTATTTTTATTAGCTCC	VAVKMLNVTAPTPLTSLQK*SRSTQVSLCELLFSRERSYFY*L	7	10	8	10	15	39		67.3887	83.4962	67.4189	97.878	132.291	351.738		72.7679	193.969		0.375152
TGTGGCAGTGAAAATGTTGAATGTGACAGCACCTACACCTCAAATGAAGTAGGAGTACTCAGGTGAGCTTGTGTGAATTACTCTTTTCCAGAGAAAGAAGTTATTTTTATTAGCTCCTGGTTCCCAGTGGA	VAVKMLNVTAPTPQMK*EYSGELV*ITLFQRKKLFLLAPGSQW	7	11	7	9	7	37		67.3887	91.8458	58.9916	88.0902	61.736	333.7		72.742	161.175		0.451322
TGTGGCAGTGAAAATGTTGAATGTGACAGCACCTACACCTCAGTTACAAGCCTTCAAAAATGAAGTAGGAGTACTCAGGTGAGCTTGTGTGAATTACTCTATTCCAGAGAAAGAAGTTATTTTTATTAGCT	VAVKMLNVTAPTPQLQAFKNEVGVLR*ACVNYSIPEKEVIFIS	7	13	5	1	3	4		67.3887	108.545	42.1368	9.7878	26.4583	36.0757		72.6902	24.1073		3.01528
TGTGGCAGTGAAAATGTTGAATGTGACAGCACCTACACCTCAGTTACAAGCCTTCAAAAATGAAGTAGGAGTACTCAGGTGAGCTTGTGTGAATTACTCTTTTCCAGAGAAAGAAGTTATGTTTATTAGCT	VAVKMLNVTAPTPQLQAFKNEVGVLR*ACVNYSFPEKEVMFIS	6	7	12	0	0	3		57.7617	58.4473	101.128	0	0	27.0568		72.4458	9.01892		8.03265
TGTGGCAGTGAAAATGTTGAATGGGACAGCACCTACACCTCAGTTACAAGCCTTCAAAAATGAAGTAGGAGTACTCAGGTGAGCTTGTGTGAATTACTCTTTTCCAGAGAAAGAAGTTATTTTTATTAGCT	VAVKMLNGTAPTPQLQAFKNEVGVLR*ACVNYSFPEKEVIFIS	4	11	10	4	1	4		38.5078	91.8458	84.2737	39.1512	8.81943	36.0757		71.5424	28.0154		2.55368
TGTGGCAGTGAAAATGTTGAATGTGACAGCACCTACACAGTTACAAGCCTTCAAAAATGAAGTAAGAGTACTCAGGTGAGCTTGTGTGAATTACTCTTTTCCAGAGAAAGAAGTTATTTTTATTAGCTCCT	VAVKMLNVTAPTQLQAFKNEVRVLR*ACVNYSFPEKEVIFISS	4	15	6	3	0	7		38.5078	125.244	50.5642	29.3634	0	63.1325		71.4388	30.832		2.31704
TGTGGCAGTGAAAATGTTGAATGTGACAGCACCTACACCTCAAGCAGTTACAAGCCTTCAAAAATGAAGTAGGAGTACTCAGGTGAGCTTGTGTGAATTACTCTTTTCCAGAGAAAGAAGTTATTTTTATT	VAVKMLNVTAPTPQAVTSLQK*SRSTQVSLCELLFSRERSYFY	9	6	9	13	41	40		86.6426	50.0977	75.8463	127.241	361.597	360.757		70.8622	283.198		0.250221
TGTGGCAGTGAAAATGTTGAATGTGACAGCACCTACACCTTTTTTGAAGGCTTGTGTGAATTACTCTTTTCCAGAGAAAGAAGTTATTTTTATTAGCTCCTGGTTCCCAGTGGACAGTGCAGGGGAAAGAA	VAVKMLNVTAPTPFLKACVNYSFPEKEVIFISSWFPVDSAGER	22	0	0	0	0	0		211.793	0	0	0	0	0		70.5977	0		-1
TGTGGCAGTGAAAATGTTGAATGTGACAGCACCTACACTGGCACTTCCCACTGTCAGTTACAAGCCTTCAAAAATGAAGTAGGAGTACTCAGGTGAGCTTGTGTGAATTACTCTTTTCCAGAGAAAGAAGT	VAVKMLNVTAPTLALPTVSYKPSKMK*EYSGELV*ITLFQRKK	22	0	0	0	0	0		211.793	0	0	0	0	0		70.5977	0		-1
TGTTGCAGTGAAAATGTTGAATGTGACAGCACCTACACCTCAGTTACAAGCCTTCAAAAATGAAGTAGGAGTACTCAGGTGAGCTTGTGTGAATTACTCTTTTCCAGAGAAAGAAGTTATTTTTATTAGCT	VAVKMLNVTAPTPQLQAFKNEVGVLR*ACVNYSFPEKEVIFIS	8	8	8	2	3	6		77.0156	66.7969	67.4189	19.5756	26.4583	54.1135		70.4105	33.3825		2.10921
TGTGGCAGTGAAAATGTTGAATGTGACAGCACCTACACCTCCAGTTACAAGCCTTCAAAAATGAAATAGGAGTACTCAGGTGAGCTTGTGTGAATTACTCTTTTCCAGAGAAAGAAGTTATTTTTATTAGC	VAVKMLNVTAPTPPVTSLQK*NRSTQVSLCELLFSRERSYFY*	7	5	12	15	9	26		67.3887	41.7481	101.128	146.817	79.3749	234.492		70.0884	153.561		0.45642
TGTGGCAGTGACAATGTTGAATGTGACAGCACCTACACCTCAGTTACAAGCCTTCAAAAATGAAGTAGGAGTACTCAGGTGAGCTTGTGTGAATTACTCTTTTCCAGAGAAAGAAGTTATTTTTATTAGCT	VAVTMLNVTAPTPQLQAFKNEVGVLR*ACVNYSFPEKEVIFIS	7	8	9	2	0	5		67.3887	66.7969	75.8463	19.5756	0	45.0946		70.0106	21.5567		3.24774
TGTGGCAGTGAAAATGTTGAATGTGACAGCACCTACACCTCAGCAATGAAGTAGGAGTACTCAGGTGAGCTTGTGTGAATTACTCTTTTCCAGAGAAAGAAGTTATTTTTATTAGCTCCTGGTTCCCAGTG	VAVKMLNVTAPTPQQ*SRSTQVSLCELLFSRERSYFY*LLVPS	6	4	14	8	12	17		57.7617	33.3985	117.983	78.3024	105.833	153.322		69.7145	112.486		0.619763
TGTGGCAGTGAAAATGTTGAATGTGACAGCACCTACACCTCAGCAGTTACAAGCCTTCGAAAATGAAGTAGGAGTACTCAGGTGAGCTTGTGTGAATTACTCTTTTCCAGAGAAAGAAGTTATTTTTATTA	VAVKMLNVTAPTPQQLQAFENEVGVLR*ACVNYSFPEKEVIFI	6	7	11	270	344	59		57.7617	58.4473	92.7011	2642.71	3033.88	532.116		69.6367	2069.57		0.0336479
TGTGGCAGTGAAAATGTAGAATGTGACAGCACCTACACCTCAGTTACAAGCCTTCAAAAATGAAGTAGGAGTACTCAGGTGAGCTTGTGTGAATTACTCTTTTCCAGAGAAAGAAGTTATTTTTATTAGCT	VAVKM*NVTAPTPQLQAFKNEVGVLR*ACVNYSFPEKEVIFIS	6	9	9	4	2	1		57.7617	75.1465	75.8463	39.1512	17.6389	9.01892		69.5849	21.9363		3.17213
TGTGGCAGTGAAAATGTTGAATGTGACAGCACCTACACCTCAGTTACAAGCCTTCAAAAATGAAGTAGGAGTACTCAGGTGAGCTTGTGTGAATTACTCTTTTCCAGAGAAAGAAGTTATTTTTAATAGCT	VAVKMLNVTAPTPQLQAFKNEVGVLR*ACVNYSFPEKEVIFNS	6	9	9	4	3	0		57.7617	75.1465	75.8463	39.1512	26.4583	0		69.5849	21.8698		3.18177
TGTGGCAGTGAAAATGCTGAATGTGACAGCACCTACACCTACAGTTACAAGCCTTCAAAAATGAAGTAGGAGTACTCAGGTGAGCTTGTGTGAATTACTCTTTTCCAGAGAAAGAAGTTATTTTTATTAGC	VAVKMLNVTAPTPTVTSLQK*SRSTQVSLCELLFSRERSYFY*	0	25	0	0	2	0		0	208.74	0	0	17.6389	0		69.5801	5.87962		11.8341
TGTGGCAGTGAAAATGTTGAATGTGACAGCACCTACACCTTCAAAAGTGAAGTAGGAGTACTCAGGTGAGCTTGTGTGAATTACTCTTTTCCAGAGAAAGAAGTTATTTTTATTAGCTCCTGGTTCCCAGT	VAVKMLNVTAPTPSKVK*EYSGELV*ITLFQRKKLFLLAPGSQ	0	25	0	1	0	0		0	208.74	0	9.7878	0	0		69.5801	3.2626		21.3266
TGTGGCAGTGAAAATGTTGAATGTGACAGCACCTACACCTGCTTCAAAAATGAAGTAGGAGTACTCAGGTGAGCTTGTGTGAATTACTCTTTTCCAGAGAAAGAAGTTATTTTTATTAGCTCCTGGTTCCC	VAVKMLNVTAPTPASKMK*EYSGELV*ITLFQRKKLFLLAPGS	0	25	0	0	0	0		0	208.74	0	0	0	0		69.5801	0		-1
TTTGGCAGTGAAAATGTTGAATGTGACAGCACCTACACCTCAGTTACAAGCCTTCAAAAATGAAGTAGGAGTACTCAGGTGAGCTTGTGTGAATTACTCTTTTCCAGAGAAAGAAGTTATTTTTATTAGCT	LAVKMLNVTAPTPQLQAFKNEVGVLR*ACVNYSFPEKEVIFIS	5	10	9	3	0	6		48.1348	83.4962	75.8463	29.3634	0	54.1135		69.1591	27.8256		2.48544
TGTGGCAGTGAAAATGTTGAATGTGACAGCACCTACACCTCAGTTACAAGCCTTCAAAAATGAAGTAGGAGTACTCAGGTGAGCTTGTGTGAATTACTCTTATCCAGAGAAAGAAGTTATTTTTATTAGCT	VAVKMLNVTAPTPQLQAFKNEVGVLR*ACVNYSYPEKEVIFIS	11	8	4	1	0	4		105.897	66.7969	33.7095	9.7878	0	36.0757		68.801	15.2878		4.50038
TGTGGCAGTGAAAATGTTGAATGTGACAGCACCTACACCTCAGCAGTTACAAGCCTTCAAAAATGGAGTAGGAGTACTCAGGTGAGCTTGTGTGAATTACTCTTTTCCAGAGAAAGAAGTTATTTTTATTA	VAVKMLNVTAPTPQQLQAFKNGVGVLR*ACVNYSFPEKEVIFI	4	12	8	230	303	61		38.5078	100.195	67.4189	2251.19	2672.29	550.154		68.7074	1824.55		0.0376573
TGTGGCAGTGAAAATGTTGAATGTGACAGCACCTACACAGTTACAAGCCTTCAAAAATGAAGTAGAAGTACTCAGGTGAGCTTGTGTGAATTACTCTTTTCCAGAGAAAGAAGTTATTTTTATTAGCTCCT	VAVKMLNVTAPTQLQAFKNEVEVLR*ACVNYSFPEKEVIFISS	4	12	8	2	3	6		38.5078	100.195	67.4189	19.5756	26.4583	54.1135		68.7074	33.3825		2.05819
TGTGGCAGTGAAAATGTTGAATGTGACAGCACCTACACCTCAGGGCAGTTACAAGCCTTCAAAAATGAAGTAGGAGTACTCAGGTGAGCTTGTGTGAATTACTCTTTTCCAGAGAAAGAAGTTATTTTTAT	VAVKMLNVTAPTPQGSYKPSKMK*EYSGELV*ITLFQRKKLFL	2	18	4	20	15	41		19.2539	150.293	33.7095	195.756	132.291	369.776		67.7522	232.608		0.291272
TGTGGCAGTGAACAGTTACAAGCCTTCAAAAATGAAGTAGGAGTACTCAGGTGAGCTTGTGTGAATTACTCTTTTCCAGAGAAAGAAGTTATTTTTATTAGCTCCTGGTTCCCAGTGGACAGTGCAGGGGA	VAVNSYKPSKMK*EYSGELV*ITLFQRKKLFLLAPGSQWTVQG	21	0	0	0	2	3		202.166	0	0	0	17.6389	27.0568		67.3887	14.8985		4.52317
TGTGGCAGTGAGCTTGTGTGAATTACTCTTTTCCAGAGAAAGAAGTTATTTTTATTAGCTCCTGGTTCCCAGTGGACAGTGCAGGGGAAAGAATAGTAGAAGATCGGAAGAGCACACGTCTGAACTCCAGT	VAVSLCELLFSRERSYFY*LLVPSGQCRGKNSRRSEEHTSELQ	21	0	0	1	0	2		202.166	0	0	9.7878	0	18.0378		67.3887	9.27521		7.26546
TGTGGCAGTGAAAATGTTGAATGTGACAGCACCTACACAGTTACAAGCCTTCAAAAATGAAGTGGGAGTACTCAGGTGAGCTTGTGTGAATTACTCTTTTCCAGAGAAAGAAGTTATTTTTATTAGCTCCT	VAVKMLNVTAPTQLQAFKNEVGVLR*ACVNYSFPEKEVIFISS	7	9	7	2	1	4		67.3887	75.1465	58.9916	19.5756	8.81943	36.0757		67.1756	21.4902		3.12587
TGTGGCAGTGAAAATGTTGAATGTGACAGCACCTACACCTTCAAAAATGTTACAAGCCTTCAAAAATGAAGTAGGAGTACTCAGGTGAGCTTGTGTGAATTACTCTTTTCCAGAGAAAGAAGTTATTTTTA	VAVKMLNVTAPTPSKMLQAFKNEVGVLR*ACVNYSFPEKEVIF	13	4	5	3	7	13		125.15	33.3985	42.1368	29.3634	61.736	117.246		66.8952	69.4485		0.963236
TGTGGCAGTGAAAATGTTGAATGTGACAGCACCTCAAAAATGAAGTAGGAGTACTCAGGTGAGCTTGTGTGAATTACTCTTTTCCAGAGAAAGAAGTTATTTTTATTAGCTCCTGGTTCCCAGTGGACAGT	VAVKMLNVTAPQK*SRSTQVSLCELLFSRERSYFY*LLVPSGQ	5	17	1	3	4	6		48.1348	141.943	8.42737	29.3634	35.2777	54.1135		66.1685	39.5849		1.67156
TGTGGCAGTGAAAATGTTGAATGTGACAGCACCTACACCTTTACAAGCCTTCAAAAATGAAGTAGGAGTACTCAGGTGAGCTTGTGTGAATTACTCTTTTCCAGAGAAAGAAGTTATTTTTATTAGCTCCT	VAVKMLNVTAPTPLQAFKNEVGVLR*ACVNYSFPEKEVIFISS	18	3	0	18	16	32		173.285	25.0488	0	176.18	141.111	288.605		66.1113	201.966		0.32734
TGTGGCAGTGAAAATGTTGAATGTGACAGCACCTACACCTCAGTTACAAGCCGTCAAAAATGAAGTAGGAGTACTCAGGTGAGCTTGTGTGAATTACTCTTTTCCAGAGAAAGAAGTTATTTTTATTAGCT	VAVKMLNVTAPTPQLQAVKNEVGVLR*ACVNYSFPEKEVIFIS	4	11	8	2	2	2		38.5078	91.8458	67.4189	19.5756	17.6389	18.0378		65.9242	18.4174		3.57944
TGTGGCAGTGAAAATGTTGAATGTGACAGCACCTTCAAAATGAAGTAGGAGTACTCAGGTGAGCTTGTGTGAATTACTCTTTTCCAGAGAAAGAAGTTATTTTTATTAGCTCCTGGTTCCCAGTGGACAGT	VAVKMLNVTAPSK*SRSTQVSLCELLFSRERSYFY*LLVPSGQ	17	0	4	7	4	8		163.658	0	33.7095	68.5146	35.2777	72.1514		65.7892	58.6479		1.12177
TGTGGCAGTGAAAATGTTGAATGTGACAGCACGTACACCTCAGTTACAAGCCTTCAAAAATGAAGTAGGAGTACTCAGGTGAGCTTGTGTGAATTACTCTTTTCCAGAGAAAGAAGTTATTTTTATTAGCT	VAVKMLNVTARTPQLQAFKNEVGVLR*ACVNYSFPEKEVIFIS	3	3	17	0	0	1		28.8809	25.0488	143.265	0	0	9.01892		65.7317	3.00631		21.8646
TGTGGCAGTGAAAATGTTGAATGTGACAGCACCTACACCTCAGTTACAAGCCTTCAAAAATGAAGTAGGAGTACTCAGGTGAGCTTGTTTGAATTACTCTTTTCCAGAGAAAGAAGTTATTTTTATTAGCT	VAVKMLNVTAPTPQLQAFKNEVGVLR*ACLNYSFPEKEVIFIS	10	3	9	1	2	4		96.2696	25.0488	75.8463	9.7878	17.6389	36.0757		65.7216	21.1674		3.10484
TGTGGCAGTGAAAATGTTGAATGTGACAGCACCTACACCTCAGTTACAAGCCTTCATAAATGAAGTAGGAGTACTCAGGTGAGCTTGTGTGAATTACTCTTTTCCAGAGAAAGAAGTTATTTTTATTAGCT	VAVKMLNVTAPTPQLQAFINEVGVLR*ACVNYSFPEKEVIFIS	9	5	8	2	1	3		86.6426	41.7481	67.4189	19.5756	8.81943	27.0568		65.2699	18.4839		3.53117
TGTGGCAGTGAAAATGTTGAATGTGACAGCACCTACAAGCCTTCAAAATGAAGTAGGAGTACTCAGGTGAGCTTGTGTGAATTACTCTTTTCCAGAGAAAGAAGTTATTTTTATTAGCTCCTGGTTCCCAG	VAVKMLNVTAPTSLQNEVGVLR*ACVNYSFPEKEVIFISSWFP	2	6	15	11	6	11		19.2539	50.0977	126.411	107.666	52.9166	99.2081		65.254	86.5968		0.753538
TGTGGCAGTGAAAATGTTGAATGTGACAGCACCTACACCTCAGTTACAAGCCTTCAAAAATGATGTAGGAGTACTCAGGTGAGCTTGTGTGAATTACTCTTTTCCAGAGAAAGAAGTTATTTTTATTAGCT	VAVKMLNVTAPTPQLQAFKNDVGVLR*ACVNYSFPEKEVIFIS	9	7	6	1	3	6		86.6426	58.4473	50.5642	9.7878	26.4583	54.1135		65.218	30.1199		2.16528
TGTGGCAGTGAAAATGTTGAATGTGACAGCACCTACACCTCAGCTCAGTTACAAGCCTTCAAAAATGAAGTAGGAGTACTCAGGTGAGCTTGTGTGAATTACTCTTTTCCAGAGAAAGAAGTTATTTTTAT	VAVKMLNVTAPTPQLSYKPSKMK*EYSGELV*ITLFQRKKLFL	9	8	5	11	11	31		86.6426	66.7969	42.1368	107.666	97.0137	279.587		65.1921	161.422		0.403861
TGTGGCAGTGAAATTGTTGAATGTGACAGCACCTACACCTCAGTTACAAGCCTTCAAAAATGAAGTAGGAGTACTCAGGTGAGCTTGTGTGAATTACTCTTTTCCAGAGAAAGAAGTTATTTTTATTAGCT	VAVKLLNVTAPTPQLQAFKNEVGVLR*ACVNYSFPEKEVIFIS	2	11	10	3	1	2		19.2539	91.8458	84.2737	29.3634	8.81943	18.0378		65.1245	18.7402		3.47512
TGTGGCAGTGAAAATGTTGAATGTGACAGCACCTACACCTCAGAAAGCCTTCAAAAATGAAGTAGGAGTACTCAGGTGAGCTTGTGTGAATTACTCTTTTCCAGAGAAAGAAGTTATTTTTATTAGCTCCT	VAVKMLNVTAPTPQKAFKNEVGVLR*ACVNYSFPEKEVIFISS	8	4	10	6	17	31		77.0156	33.3985	84.2737	58.7268	149.93	279.587		64.8959	162.748		0.398751
TGTGGCAGTGAAAATGTTGAATGTGACAGCACCTACACCTCAGTCCTTCAAAAATGAAGTAGGAGTACTCAGGTGAGCTTGTGTGAATTACTCTTTTCCAGAGAAAGAAGTTATTTTTATTAGCTCCTGGT	VAVKMLNVTAPTPQSFKNEVGVLR*ACVNYSFPEKEVIFISSW	2	21	0	0	1	0		19.2539	175.342	0	0	8.81943	0		64.8653	2.93981		22.0644
TGTGGCAGTGAAAATGTTGAATGTGACAGCACCTACACCTGAAGTAGGAGTACTCAGGTGAGCTTGTGTGAATTACTCTTTTCCAGAGAAAGAAGTTATTTTTATTAGCTCCTGGTTCCCAGTGGACAGTG	VAVKMLNVTAPTPEVGVLR*ACVNYSFPEKEVIFISSWFPVDS	8	7	7	49	25	33		77.0156	58.4473	58.9916	479.602	220.486	297.624		64.8182	332.571		0.1949
TGTGGCAGTGAAAATGTTGAAGGCAGTTACAAGCCTTCAAAAATGAAGTAGGAGTACTCAGGTGAGCTTGTGTGAATTACTCTTTTCCAGAGAAAGAAGTTATTTTTATTAGCTCCTGGTTCCCAGTGGAC	VAVKMLKAVTSLQK*SRSTQVSLCELLFSRERSYFY*LLVPSG	0	0	23	2	0	6		0	0	193.829	19.5756	0	54.1135		64.6098	24.563		2.63037
TGTGGCAGTGAAAATGTTGAATGTGACAGCACCTACACCTACACTACAAGCCTTCAAAAATGAAGTAGGAGTACTCAGGTGAGCTTGTGTGAATTACTCTTTTCCAGAGAAAGAAGTTATTTTTATTAGCT	VAVKMLNVTAPTPTLQAFKNEVGVLR*ACVNYSFPEKEVIFIS	0	0	23	0	1	6		0	0	193.829	0	8.81943	54.1135		64.6098	20.9777		3.07994
TGTGGCAGTGAAAATGTTGAATGTGACAGCACCTACACCTCATGGACAAGCCTTCAAAAATGAAGTAGGAGTACTCAGGTGAGCTTGTGTGAATTACTCTTTTCCAGAGAAAGAAGTTATTTTTATTAGCT	VAVKMLNVTAPTPHGQAFKNEVGVLR*ACVNYSFPEKEVIFIS	0	0	23	0	0	0		0	0	193.829	0	0	0		64.6098	0		-1
TGTGGCAGTGAAAATGTTGAATGTGACAGCACCTACACCTCAGTAGGTTACAAGCCTTCAAAAATGAAGTAGGAGTACTCAGGTGAGCTTGTGTGAATTACTCTTTTCCAGAGAAAGAAGTTATTTTTATT	VAVKMLNVTAPTPQ*VTSLQK*SRSTQVSLCELLFSRERSYFY	7	1	14	1	2	15		67.3887	8.34962	117.983	9.7878	17.6389	135.284		64.5738	54.2368		1.19059
TGTGGCCTTCAAAAATGAAGTAGGAGTACTCAGGTGAGCTTGTGTGAATTACTCTTTTCCAGAGAAAGAAGTTATTTTTATTAGCTCCTGGTTCCCAGTGGACAGTGCAGGGGAAAGAATAGTAGAAGATC	VAFKNEVGVLR*ACVNYSFPEKEVIFISSWFPVDSAGERIVED	0	4	19	13	6	18		0	33.3985	160.12	127.241	52.9166	162.341		64.5062	114.166		0.56502
TGTGGCAGTGAAAATGTTGAATGTGACAGCACCTAATTACAAGCCTTCAAAAATGAAGTAGGAGTACTCAGGTGAGCTTGTGTGAATTACTCTTTTCCAGAGAAAGAAGTTATTTTTATTAGCTCCTGGTT	VAVKMLNVTAPNYKPSKMK*EYSGELV*ITLFQRKKLFLLAPG	0	6	17	0	0	0		0	50.0977	143.265	0	0	0		64.4543	0		-1
TGTGGCAGTGAAAATGTTGAATGTGACAGCACCTACACCTGAGGTGTTACAAGCCTTCAAAAATGAAGTAGGAGTACTCAGGTGAGCTTGTGTGAATTACTCTTTTCCAGAGAAAGAAGTTATTTTTATTA	VAVKMLNVTAPTPEVLQAFKNEVGVLR*ACVNYSFPEKEVIFI	0	10	13	3	4	9		0	83.4962	109.556	29.3634	35.2777	81.1703		64.3506	48.6038		1.32398
TGTGGCAGTGAAAATGTTGAATGTGACAGCACCTACACATACAAGCCTTCAAAAATGAAGTAGGAGTACTCAGGTGAGCTTGTGTGAATTACTCTTTTCCAGAGAAAGAAGTTATTTTTATTAGCTCCTGG	VAVKMLNVTAPTHTSLQK*SRSTQVSLCELLFSRERSYFY*LL	20	0	0	0	0	2		192.539	0	0	0	0	18.0378		64.1797	6.01261		10.6742
TGTGGCAGTGAAAATGTTGAATGTGACAGCACCTACACCTCAGCGCCAGTTACAAGCCTTCAAAAATGAAGTAGGAGTACTCAGGTGAGCTTGTGTGAATTACTCTTTTCCAGAGAAAGAAGTTATTTTTA	VAVKMLNVTAPTPQRQLQAFKNEVGVLR*ACVNYSFPEKEVIF	20	0	0	0	0	1		192.539	0	0	0	0	9.01892		64.1797	3.00631		21.3484
TGTGGCAGTGAAAATGTTGAATGTGACAGCACCTACACCTTCAACTTTCAAGCCTTCAAAAATGAAGTAGGAGTACTCAGGTGAGCTTGTGTGAATTACTCTTTTCCAGAGAAAGAAGTTATTTTTATTAG	VAVKMLNVTAPTPSTFKPSKMK*EYSGELV*ITLFQRKKLFLL	20	0	0	0	0	0		192.539	0	0	0	0	0		64.1797	0		-1
TGTGGCAGTGAAAATGTTGAATGTGACAGCACCTACACCTCACCTACACCGTTACAAGCCTTCAAAAATGAAGTAGGAGTACTCAGGTGAGCTTGTGTGAATTACTCTTTTCCAGAGAAAGAAGTTATTTT	VAVKMLNVTAPTPHLHRYKPSKMK*EYSGELV*ITLFQRKKLF	20	0	0	0	0	0		192.539	0	0	0	0	0		64.1797	0		-1
TGTGGCAGTGAAAATGTTGAATGTGACAGCACCTACACCTCAAAAGCCTTGTAACTACACCTACAAGCCTTCAAAAATGAAGTAGGAGTACTCAGGTGAGCTTGTGTGAATTACTCTTTTCCAGAGAAAGA	VAVKMLNVTAPTPQKPCNYTYKPSKMK*EYSGELV*ITLFQRK	20	0	0	0	0	0		192.539	0	0	0	0	0		64.1797	0		-1
TGTGGCAGTGAAAATGTTGAATGTGACAGCACCTACACCTCAGTTACATGCCTTCAAAAATGAAGTAGGAGTACTCAGGTGAGCTTGTGTGAATTACTCTTTTCCAGAGAAAGAAGTTATTTTTATTAGCT	VAVKMLNVTAPTPQLHAFKNEVGVLR*ACVNYSFPEKEVIFIS	6	7	9	2	0	1		57.7617	58.4473	75.8463	19.5756	0	9.01892		64.0185	9.53151		6.71651
TGTGGCAGTGAAAATGTTGAGAAAGAAGTTATTTTTATTAGCTCCTGGTTCCCAGTGGACAGTGCAGGGGAAAGAATAGTAGAAGATCGGAAGAGCACACGTCTGAACTCCAGTCACAACTTGGCATCTCG	VAVKMLRKKLFLLAPGSQWTVQGKE**KIGRAHV*TPVTTWHL	0	23	0	0	0	0		0	192.041	0	0	0	0		64.0137	0		-1
TGTGGCAGTGAAAATGTTGAATGTGCAGCAGTTACAAGCCTTCAAAAATGAAGTAGGAGTACTCAGGTGAGCTTGTGTGAATTACTCTTTTCCAGAGAAAGAAGTTATTTTTATTAGCTCCTGGTTCCCAG	VAVKMLNVQQLQAFKNEVGVLR*ACVNYSFPEKEVIFISSWFP	0	23	0	0	0	0		0	192.041	0	0	0	0		64.0137	0		-1
TGTGGCAGTGAAAATGTTGAATGTGACAGCACCTACACCTCAGAAAAGAATTACTCTTTTCCAGAGAAAGAAGTTATTTTTATTAGCTCCTGGTTCCCAGTGGACAGTGCAGGGGAAAGAATAGTAGAAGA	VAVKMLNVTAPTPQKRITLFQRKKLFLLAPGSQWTVQGKE**K	0	23	0	0	0	0		0	192.041	0	0	0	0		64.0137	0		-1
TGTGGCAGTGAAAATGTTGAATGTGACAGCACCTACACCTCAGTTACAAGCCTTCAAAAATGAAGTAGGAGTACTCAGGTGATCTTGTGTGAATTACTCTTTTCCAGAGAAAGAAGTTATTTTTATTAGCT	VAVKMLNVTAPTPQLQAFKNEVGVLR*SCVNYSFPEKEVIFIS	6	8	8	0	2	2		57.7617	66.7969	67.4189	0	17.6389	18.0378		63.9925	11.8922		5.38104
TGTGGCAGTGAAAATGTTGAATGTGACAGCACCTACACCTCAGTTACAAGCCTTCAAAAATGAAGTAGGAGTACTCAGGTGAGCTTGTGTGAATTACTCTTTTCCAGAGAAAGAAGTTATTTTTATTAGCG	VAVKMLNVTAPTPQLQAFKNEVGVLR*ACVNYSFPEKEVIFIS	5	6	11	3	1	3		48.1348	50.0977	92.7011	29.3634	8.81943	27.0568		63.6445	21.7465		2.92665
TGTGGCAGTGAAAATGTTGAATTTGACAGCACCTACACCTCAGTTACAAGCCTTCAAAAATGAAGTAGGAGTACTCAGGTGAGCTTGTGTGAATTACTCTTTTCCAGAGAAAGAAGTTATTTTTATTAGCT	VAVKMLNLTAPTPQLQAFKNEVGVLR*ACVNYSFPEKEVIFIS	4	13	5	0	0	2		38.5078	108.545	42.1368	0	0	18.0378		63.0632	6.01261		10.4885
TGTGGCAGTGAAAATGTTGAATGTGACAGCACCTACACCTCATGAAGTAGGAGTACTCAGGTGAGCTTGTGTGAATTACTCTTTTCCAGAGAAAGAAGTTATTTTTATTAGCTCCTGGTTCCCAGTGGACA	VAVKMLNVTAPTPHEVGVLR*ACVNYSFPEKEVIFISSWFPVD	3	6	13	7	10	30		28.8809	50.0977	109.556	68.5146	88.1943	270.568		62.8448	142.426		0.441247
TGTGGCAGTGAAAATGTTGAATGTGACAGCACCTACACCTCAGTTACAAGCCTTCAATAATGAAGTAGGAGTACTCAGGTGAGCTTGTGTGAATTACTCTTTTCCAGAGAAAGAAGTTATTTTTATTAGCT	VAVKMLNVTAPTPQLQAFNNEVGVLR*ACVNYSFPEKEVIFIS	2	9	11	1	1	2		19.2539	75.1465	92.7011	9.7878	8.81943	18.0378		62.3672	12.215		5.10577
TGTGGCAGTGAAAATGTTGAATGTGACAGCACCTACACCTCAGCAGTTACAAGCCTTCAAAAGTGAAGTAGGAGTACTCAGGTGAGCTTGTGTGAATTACTCTTTTCCAGAGAAAGAAGTTATTTTTATTA	VAVKMLNVTAPTPQQLQAFKSEVGVLR*ACVNYSFPEKEVIFI	9	9	3	274	341	63		86.6426	75.1465	25.2821	2681.86	3007.43	568.192		62.3571	2085.83		0.0298956
TGTGGCAGTGAAAATGTTGAATGTGACAGCACCTACACCTCAAGCCTTCAAAAATGAAGTAGAAGTACTCAGGTGAGCTTGTGTGAATTACTCTTTTCCAGAGAAAGAAGTTATTTTTATTAGCTCCTGGT	VAVKMLNVTAPTPQAFKNEVEVLR*ACVNYSFPEKEVIFISSW	9	9	3	3	4	1		86.6426	75.1465	25.2821	29.3634	35.2777	9.01892		62.3571	24.5533		2.53966
TGTGGCAGTGAAAATGTTGAATGTGACAGCACCTACAAGTAGGAGTACTCAGGTGAGCTTGTGTGAATTACTCTTTTCCAGAGAAAGAAGTTATTTTTATTAGCTCCTGGTTCCCAGTGGACAGTGCAGGG	VAVKMLNVTAPTSRSTQVSLCELLFSRERSYFY*LLVPSGQCR	2	19	1	9	6	31		19.2539	158.643	8.42737	88.0902	52.9166	279.587		62.108	140.198		0.443003
TGTGGCAGTGAAAATGTTGAATGTGACAGCACCTACACAACAGTTACAAGCCTTCAAAAATGAAGTAGGAGTACTCAGGTGAGCTTGTGTGAATTACTCTTTTCCAGAGAAAGAAGTTATTTTTATTAGCT	VAVKMLNVTAPTQQLQAFKNEVGVLR*ACVNYSFPEKEVIFIS	8	13	0	3	1	0		77.0156	108.545	0	29.3634	8.81943	0		61.8535	12.7276		4.85979
TGTGGCAGTGAAAATGTTGAATGTGACAGCACCTACACCTTGTACACAAGCCTTCAAAAATGAAGTAGGAGTACTCAGGTGAGCTTGTGTGAATTACTCTTTTCCAGAGAAAGAAGTTATTTTTATTAGCT	VAVKMLNVTAPTPCTQAFKNEVGVLR*ACVNYSFPEKEVIFIS	0	0	22	0	0	0		0	0	185.402	0	0	0		61.8007	0		-1
TGTGGCAGTGAAAATGTTGAATGTGACAGCATTTATTAGCTCCTGGTTCCCAGTGGACAGTGCAGGGGAAAGAATAGTAGAAGATCGGAAGAGCACACGTCTGAACTCCAGTCACAAGATGCGATCTCGTA	VAVKMLNVTAFISSWFPVDSAGERIVEDRKSTRLNSSHKMRSR	0	0	22	0	0	0		0	0	185.402	0	0	0		61.8007	0		-1
TGTGGCAGTGAAAATGTTGAATGAGTTACAAGCCTTCAAAAATGAAGTAGGAGTACTCAGGTGAGCTTGTGTGAATTACTCTTTTCCAGAGAAAGAAGTTATTTTTATTAGCTCCTGGTTCCCAGTGGACA	VAVKMLNELQAFKNEVGVLR*ACVNYSFPEKEVIFISSWFPVD	0	22	0	6	2	0		0	183.692	0	58.7268	17.6389	0		61.2305	25.4552		2.40542
TGTGGCAGTGAAAATGTTGAATGTGACAGTACCTACACCTCAGCCTTCAAAAATGAAGTAGGAGTACTCAGGTGAGCTTGTGTGAATTACTCTTTTCCAGAGAAAGAAGTTATTTTTATTAGCTCCTGGTT	VAVKMLNVTVPTPQPSKMK*EYSGELV*ITLFQRKKLFLLAPG	0	22	0	0	0	4		0	183.692	0	0	0	36.0757		61.2305	12.0252		5.09184
TGTGGCAGTGAAAATGTTGAATGTGACAGCACCTACACAAAGCCTTCAAGCCTTCAAAAATGAAGTAGGAGTACTCAGGTGAGCTTGTGTGAATTACTCTTTTCCAGAGAAAGAAGTTATTTTTATTAGCT	VAVKMLNVTAPTQSLQAFKNEVGVLR*ACVNYSFPEKEVIFIS	0	22	0	0	0	0		0	183.692	0	0	0	0		61.2305	0		-1
TGTGGCAGTGAAAATGTTGAATGTGACAGCACCTACACCTCAGCAAGCCTTCAAAATGAAGCAGTTACAAGCCTTCAAAAATGAAGTAGGAGTACTCAGGTGAGCTTGTGTGAATTACTCTTTTCCAGAGA	VAVKMLNVTAPTPQQAFKMKQLQAFKNEVGVLR*ACVNYSFPE	0	22	0	0	0	0		0	183.692	0	0	0	0		61.2305	0		-1
TGTGGCAGTGAAAATGTTGAATGTGACAGCACCTACACCTTGTAACAGTTACAAGCCTTCAAAAATGAAGTAGGAGTACTCAGGTGAGCTTGTGTGAATTACTCTTTTCCAGAGAAAGAAGTTATTTTTAT	VAVKMLNVTAPTPCNSYKPSKMK*EYSGELV*ITLFQRKKLFL	13	6	1	5	3	2		125.15	50.0977	8.42737	48.939	26.4583	18.0378		61.2252	31.145		1.96581
TGTGGCAGTGAAAATGTTAATGTGACAGCACCTACACCTCAGTTACAAGCCTTCAAAAATGAAGTAGGAGTACTCAGGTGAGCTTGTGTGAATTACTCTTTTCCAGAGAAAGAAGTTATTTTTATTAGCTC	VAVKMLM*QHLHLSYKPSKMK*EYSGELV*ITLFQRKKLFLLA	6	7	8	3	0	0		57.7617	58.4473	67.4189	29.3634	0	0		61.2093	9.7878		6.25363
TGTGGCAGTGAAAATGTTGAATGTGACAGCACCTACACCTCAGTTACAAGCCTTCAAAAATGAAGTAGGAGTACTCAGGTGAGCTTGTGTGAATTACTCTTTTCCAGAGAAAGAAGTTATTTTTATGAGCT	VAVKMLNVTAPTPQLQAFKNEVGVLR*ACVNYSFPEKEVIFMS	6	9	6	2	0	0		57.7617	75.1465	50.5642	19.5756	0	0		61.1575	6.5252		9.37251
TGTGGCAGTGAAAATGTTGAATGTGACAGCACCTACACCTCAGCTCCTGGTTCCCAGTGGACAGTGCAGGGGAAAGAATAGTAGAAGATCGGAAGAGCACACGTCTGAACTCCAGTCACGGTCCACGATCT	VAVKMLNVTAPTPQLLVPSGQCRGKNSRRSEEHTSELQSRSTI	19	0	0	0	0	0		182.912	0	0	0	0	0		60.9707	0		-1
TGTGGCAGTGAAAATGTTGAATGTGACAGCACCTACACCTCAGCTCCTGGTTCCCAGTGGACAGTGCAGGGGAAAGAATAGTAGAAGATCGGAAGAGCACACGTCTGAACTCCAGTCACGGCTCAATATCT	VAVKMLNVTAPTPQLLVPSGQCRGKNSRRSEEHTSELQSRLNI	19	0	0	0	0	0		182.912	0	0	0	0	0		60.9707	0		-1
TGTGGCAGTGAAAATGTTGCAGTTACAAGCCTTCAAAAATGAAGTAGGAGTACTCAGGTGAGCTTGTGTGAATTACTCTTTTCCAGAGAAAGAAGTTATTTTTATTAGCTCCTGGTTCCCAGTGGACAGTG	VAVKMLQLQAFKNEVGVLR*ACVNYSFPEKEVIFISSWFPVDS	12	7	1	5	2	7		115.523	58.4473	8.42737	48.939	17.6389	63.1325		60.7994	43.2368		1.4062
TGTGGCAGTGAAAATGTTGAATGTGACAGCACCTACACCTCAAGCCTTCAAAATGAAGTTACAAGCCTTCAAAAATGAAGTAGGAGTACTCAGGTGAGCTTGTGTGAATTACTCTTTTCCAGAGAAAGAAG	VAVKMLNVTAPTPQAFKMKLQAFKNEVGVLR*ACVNYSFPEKE	5	16	0	0	0	2		48.1348	133.594	0	0	0	18.0378		60.5762	6.01261		10.0749
TGTGGCAGTGAAAATGTTGAATGTGACAGCACCTAGGAGTACTCAGGTGAGCTTGTGTGAATTACTCTTTTCCAGAGAAAGAAGTTATTTTTATTAGCTCCTGGTTCCCAGTGGACAGTGCAGGGGAAAGA	VAVKMLNVTAPRSTQVSLCELLFSRERSYFY*LLVPSGQCRGK	4	8	9	8	6	37		38.5078	66.7969	75.8463	78.3024	52.9166	333.7		60.3837	154.973		0.38964
TGTGGCAGTGAAAATGTTGAATGTGACAGCACCTACACCTCAGTTACAAGCCTTCAAAAATGAAGTAGGAGTACTCAGGTGAGCTTGTGTGAATTACTCTTTTCCAGAGAAAGAAGTTATTATTATTAGCT	VAVKMLNVTAPTPQLQAFKNEVGVLR*ACVNYSFPEKEVIIIS	10	7	3	1	2	3		96.2696	58.4473	25.2821	9.7878	17.6389	27.0568		59.9997	18.1611		3.30374
TGTGGCAGTGAAAATGTTGAATGTGACAGCACCTACACCTCAAAATGAAGCCTTCAAAAATGAAGTAGGAGTACTCAGGTGAGCTTGTGTGAATTACTCTTTTCCAGAGAAAGAAGTTATTTTTATTAGCT	VAVKMLNVTAPTPQNEAFKNEVGVLR*ACVNYSFPEKEVIFIS	3	10	8	4	13	18		28.8809	83.4962	67.4189	39.1512	114.653	162.341		59.932	105.381		0.568715
TGTGGCAGTGAAAATGTTGAATGTGACAGCACCTACACCTCGGCAGTTACAAGCCTTCAAAAATGAAGTAGGAGTACTCAGGTGAGCTTGTGTGAATTACTCTTTTCCAGAGAAAGAAGTTATTTTTATTA	VAVKMLNVTAPTPRQLQAFKNEVGVLR*ACVNYSFPEKEVIFI	16	2	1	39	49	6		154.031	16.6992	8.42737	381.724	432.152	54.1135		59.7193	289.33		0.206406
TGTGGCAGTGAAAATGTTGAATGTGACAGCACCTACACCTCAGCCTTCAAAAATGAAGTTACAAGCCTTCAAAAATGAAGTAGGAGTACTCAGGTGAGCTTGTGTGAATTACTCTTTTCCAGAGAAAGAAG	VAVKMLNVTAPTPQPSKMKLQAFKNEVGVLR*ACVNYSFPEKE	9	7	4	3	3	16		86.6426	58.4473	33.7095	29.3634	26.4583	144.303		59.5998	66.7081		0.893441
TGTGGCAGTGAAAATGTTGAAAGCCTTCAAAAATGAAGTAGGAGTACTCAGGTGAGCTTGTGTGAATTACTCTTTTCCAGAGAAAGAAGTTATTTTTATTAGCTCCTGGTTCCCAGTGGACAGTGCAGGGG	VAVKMLKAFKNEVGVLR*ACVNYSFPEKEVIFISSWFPVDSAG	2	17	2	2	10	10		19.2539	141.943	16.8547	19.5756	88.1943	90.1892		59.3507	65.9864		0.899439
TGTGGCAGTGAAAATGTTGAATGTGACAGCACCTACACCTCAGCAGTTACAAGCCTTCAAAAATAAAGTAGGAGTACTCAGGTGAGCTTGTGTGAATTACTCTTTTCCAGAGAAAGAAGTTATTTTTATTA	VAVKMLNVTAPTPQQLQAFKNKVGVLR*ACVNYSFPEKEVIFI	8	6	6	236	332	46		77.0156	50.0977	50.5642	2309.92	2928.05	414.87		59.2258	1884.28		0.0314315
TGTGGCAGTGAAAATGTTGAATGTGACAGCACCTACACCTCAGTTACAAGCCTTCAAAAATGAAGTAGGAGTACTCAGGTGAGCTTGTGTGACTTACTCTTTTCCAGAGAAAGAAGTTATTTTTATTAGCT	VAVKMLNVTAPTPQLQAFKNEVGVLR*ACVTYSFPEKEVIFIS	8	9	3	1	0	6		77.0156	75.1465	25.2821	9.7878	0	54.1135		59.1481	21.3004		2.77685
TGTGGCAGTGCAAATGTTGAATGTGACAGCACCTACACCTCAGTTACAAGCCTTCAAAAATGAAGTAGGAGTACTCAGGTGAGCTTGTGTGAATTACTCTTTTCCAGAGAAAGAAGTTATTTTTATTAGCT	VAVQMLNVTAPTPQLQAFKNEVGVLR*ACVNYSFPEKEVIFIS	5	11	4	0	1	3		48.1348	91.8458	33.7095	0	8.81943	27.0568		57.8967	11.9587		4.84137
TGTGGCAGTGAAAATGTTGAATGTGACAGCACCTACACATTTGAAGTTACAAGCCTTCAAAAATGAAGTAGGAGTACTCAGGTGAGCTTGTGTGAATTACTCTTTTCCAGAGAAAGAAGTTATTTTTATTA	VAVKMLNVTAPTHLKLQAFKNEVGVLR*ACVNYSFPEKEVIFI	18	0	0	2	0	1		173.285	0	0	19.5756	0	9.01892		57.7617	9.53151		6.06008
TGTGGCAGAGAAAGAAGTTATTTTTATTAGCTCCTGGTTCCCAGTGGACAGTGCAGGGGAAAGAATAGTAGAAGATCGGAAGAGCACACGTCTGAACTCCAGTCACGGTCCACGATCTCGTATGCCGTCTT	VAEKEVIFISSWFPVDSAGERIVEDRKSTRLNSSHGPRSRMPS	18	0	0	0	0	0		173.285	0	0	0	0	0		57.7617	0		-1
TGTGGCAGTGAAAATGTTGAATGTGACAGCACCTACACCAGTGTTACAAGCCTTCAAAAATGAAGTAGGAGTACTCAGGTGAGCTTGTGTGAATTACTCTTTTCCAGAGAAAGAAGTTATTTTTATTAGCT	VAVKMLNVTAPTPVLQAFKNEVGVLR*ACVNYSFPEKEVIFIS	18	0	0	0	0	0		173.285	0	0	0	0	0		57.7617	0		-1
TGTGGCAGTGAAAATGTTGAATGTGACAGCACCTACACCTCAGAGGTACAAGCCCATTTTTGAAGGTACAAGCCTTCAAAAATGAAGTAGGAGTACTCAGGTGAGCTTGTGTGAATTACTCTTTTCCAGAG	VAVKMLNVTAPTPQRYKPIFEGTSLQK*SRSTQVSLCELLFSR	18	0	0	0	0	0		173.285	0	0	0	0	0		57.7617	0		-1
TGTGGCAGTGAAAATGTTGAATGTGACAGCACCTACACCTCAAGCCTTCAAAAATGAAGTAGGAATACTCAGGTGAGCTTGTGTGAATTACTCTTTTCCAGAGAAAGAAGTTATTTTTATTAGCTCCTGGT	VAVKMLNVTAPTPQAFKNEVGILR*ACVNYSFPEKEVIFISSW	4	11	5	2	2	6		38.5078	91.8458	42.1368	19.5756	17.6389	54.1135		57.4968	30.4427		1.88869
TGTGGCAGTGAAAATGTTGAATGTGACAGCACCTACACCTCACTTACAAGCCTTCAAAAATGAAGTAGGAGTACTCAGGTGAGCTTGTGTGAATTACTCTTTTCCAGAGAAAGAAGTTATTTTTATTAGCT	VAVKMLNVTAPTPHLQAFKNEVGVLR*ACVNYSFPEKEVIFIS	17	0	1	7	4	0		163.658	0	8.42737	68.5146	35.2777	0		57.3619	34.5974		1.65798
TGTGGCAGTGAAAATGTTGAATGTGACAGCACCTACACCAGCCTTCAAAAATGAAGTAGGAGTACTCAGGTGAGCTTGTGTGAATTACTCTTTTCCAGAGAAAGAAGTTATTTTTATTAGCTCCTGGTTCC	VAVKMLNVTAPTPAFKNEVGVLR*ACVNYSFPEKEVIFISSWF	3	2	15	6	1	26		28.8809	16.6992	126.411	58.7268	8.81943	234.492		57.3302	100.679		0.569433
TGTGGCAGTGAAAATGTTGAATGTGACAGCACCTACAAGACAGTTACAAGCCTTCAAAAATGAAGTAGGAGTACTCAGGTGAGCTTGTGTGAATTACTCTTTTCCAGAGAAAGAAGTTATTTTTATTAGCT	VAVKMLNVTAPTRQLQAFKNEVGVLR*ACVNYSFPEKEVIFIS	3	2	15	0	0	0		28.8809	16.6992	126.411	0	0	0		57.3302	0		-1
TGTGGCAGTGAAAATGTTGAATGTGACAGCACCTACACCTCAAAAATGTTACAAGCCTTCAAAAATGAAGTAGGAGTACTCAGGTGAGCTTGTGTGAATTACTCTTTTCCAGAGAAAGAAGTTATTTTTAT	VAVKMLNVTAPTPQKCYKPSKMK*EYSGELV*ITLFQRKKLFL	3	15	2	7	4	32		28.8809	125.244	16.8547	68.5146	35.2777	288.605		56.9933	130.799		0.435731
TGTGGCAGTGAAAATGTTGAATGTGACAGCAGCCTTCAAAAATGAAGTAGGAGTACTCAGGTGAGCTTGTGTGAATTACTCTTTTCCAGAGAAAGAAGTTATTTTTATTAGCTCCTGGTTCCCAGTGGACA	VAVKMLNVTAAFKNEVGVLR*ACVNYSFPEKEVIFISSWFPVD	9	2	8	3	4	5		86.6426	16.6992	67.4189	29.3634	35.2777	45.0946		56.9203	36.5786		1.55611
TGTGGCAGTGAAAATGTTGAATGTGACAGCACCTACACCTCCTCAGTTACAAGCCTTCAAAAATGAAGTAGGAGTACTCAGGTGAGCTTGTGTGAATTACTCTTTTCCAGAGAAAGAAGTTATTTTTATTA	VAVKMLNVTAPTPPQLQAFKNEVGVLR*ACVNYSFPEKEVIFI	8	3	8	3	4	5		77.0156	25.0488	67.4189	29.3634	35.2777	45.0946		56.4945	36.5786		1.54447
TGTGGCAGTGAAAATGTTGAATGTGACAGCACCTACACCTCAGCGCAGTTACAAGCCTTCAAAAATGAAGTAGGAGTACTCAGGTGAGCTTGTGTGAATTACTCTTTTCCAGAGAAAGAAGTTATTTTTAT	VAVKMLNVTAPTPQRSYKPSKMK*EYSGELV*ITLFQRKKLFL	8	4	7	10	11	21		77.0156	33.3985	58.9916	97.878	97.0137	189.397		56.4686	128.096		0.440829
TGTGGCAGTGAAAATGTTGAATGTGACAGCACCTACACCTCAGTTACAAGCCTTCAAAAATGAAGTAGGAGTACTCAGGTGAGCTTGTGTGAATTACTCTTTTCCAGAGAAAGAAGTAATTTTTATTAGCT	VAVKMLNVTAPTPQLQAFKNEVGVLR*ACVNYSFPEKEVIFIS	8	4	7	0	3	6		77.0156	33.3985	58.9916	0	26.4583	54.1135		56.4686	26.8573		2.10254
TGTGGCAGTGAAAATGTTGAATGTGACAGCACCTACACCTCAGTTACAAGCCTTCAAAAATGAAGTAGGAGTACTCAGGTGAGCTTGTGTGAATTACTCTTTTCCAGAGAAAGAAGTTATTTTAATTAGCT	VAVKMLNVTAPTPQLQAFKNEVGVLR*ACVNYSFPEKEVILIS	1	10	9	1	1	3		9.62696	83.4962	75.8463	9.7878	8.81943	27.0568		56.3231	15.2213		3.70028
TGTGGCAGTGAAAATGTTGAATGTGACAGCACCTACACCTCAGTTACTGAGGTTACAAGCCTTCAAAAATGAAGTAGGAGTACTCAGGTGAGCTTGTGTGAATTACTCTTTTCCAGAGAAAGAAGTTATTT	VAVKMLNVTAPTPQLLRLQAFKNEVGVLR*ACVNYSFPEKEVI	0	0	20	1	0	0		0	0	168.547	9.7878	0	0		56.1825	3.2626		17.2201
TGTGGCAGTGAAAATGTTGAATGTGACAGCACCTACACCTCAAAAATGAAGTAGGAGTACTCAGGTGAGTACTCAGGTGAGCTTGTGTGAATTACTCTTTTCCAGAGAAAGAAGTTATTTTTATTAGCTCC	VAVKMLNVTAPTPQK*SRSTQVSTQVSLCELLFSRERSYFY*L	0	0	20	0	0	0		0	0	168.547	0	0	0		56.1825	0		-1
TGTGGCAATTTACAAGCCTTCAAAAATGAAGTAGGAGTACTCAGGTGAGCTTGTGTGAATTACTCTTTTCCAGAGAAAGAAGTTATTTTTATTAGCTCCTGGTTCCCAGTGGACAGTGCAGGGGAAAGAAT	VAIYKPSKMK*EYSGELV*ITLFQRKKLFLLAPGSQWTVQGKE	0	0	20	0	0	0		0	0	168.547	0	0	0		56.1825	0		-1
TGTGGCAGTGAAAATGTTGAATGTGACAGCACCTACACCTCACAAAGCCTTCAAAAATGAAGTAGGAGTACTCAGGTGAGCTTGTGTGAATTACTCTTTTCCAGAGAAAGAAGTTATTTTTATTAGCTCCT	VAVKMLNVTAPTPHKAFKNEVGVLR*ACVNYSFPEKEVIFISS	0	0	20	0	0	0		0	0	168.547	0	0	0		56.1825	0		-1
TGTGGCAGTGAAAATGTTGAATGTGACAGCACCTACACCTCAAAATGTAGTAGGAGCCTTCAAAAATGAAGTAGGAGTACTCAGGTGAGCTTGTGTGAATTACTCTTTTCCAGAGAAAGAAGTTATTTTTA	VAVKMLNVTAPTPQNVVGAFKNEVGVLR*ACVNYSFPEKEVIF	0	0	20	0	0	0		0	0	168.547	0	0	0		56.1825	0		-1
TGTGGCAGTGAAAATGTTGAATGTGACAGCACCTACACCTCAGTTACAAGCCTTCAAAAATGAAGTAGGAGTACTCAGGTGAGCTTGTGTGAATTACTCTTTTCCAGAGAAAGAAGTTATTTTTAGTAGCT	VAVKMLNVTAPTPQLQAFKNEVGVLR*ACVNYSFPEKEVIFSS	7	4	8	0	0	5		67.3887	33.3985	67.4189	0	0	45.0946		56.0687	15.0315		3.73007
TGTGGCAGTGAAAATGTTGAATGTGACAGCACCTACACCTCAGAAAATGAAGTAGGAGTACTCAGGTGAGCTTGTGTGAATTACTCTTTTCCAGAGAAAGAAGTTATTTTTATTAGCTCCTGGTTCCCAGT	VAVKMLNVTAPTPQKMK*EYSGELV*ITLFQRKKLFLLAPGSQ	7	6	6	5	5	14		67.3887	50.0977	50.5642	48.939	44.0972	126.265		56.0169	73.1004		0.766301
TGTGGCAGTGAAAATGTTGAATGTGACAGCACCTACACCTCAGATCAGTTACAAGCCTTCAAAAATGAAGTAGGAGTACTCAGGTGAGCTTGTGTGAATTACTCTTTTCCAGAGAAAGAAGTTATTTTTAT	VAVKMLNVTAPTPQISYKPSKMK*EYSGELV*ITLFQRKKLFL	0	15	5	0	0	3		0	125.244	42.1368	0	0	27.0568		55.7937	9.01892		6.18629
TGTGGCAGTGAAAATGTTGAATGTGACAGCACCTACACCTCAGTTACAGTTATTTTTATTAGCTCCTGGTTCCCAGTGGACAGTGCAGGGGAAAGAATAGTAGAAGATCGGAAGAGCACACGTCTGAACTC	VAVKMLNVTAPTPQLQLFLLAPGSQWTVQGKE**KIGRAHV*T	0	20	0	0	0	0		0	166.992	0	0	0	0		55.6641	0		-1
TGTGGCAGTGAAAATGTTGAATGTGACAGCACCTACACCTCAGTTAGGTTACTCAGTTACAAGCCTTCAAAAATGAAGTAGGAGTACTCAGGTGAGCTTGTGTGAATTACTCTTTTCCAGAGAAAGAAGTT	VAVKMLNVTAPTPQLGYSVTSLQK*SRSTQVSLCELLFSRERS	0	20	0	0	0	0		0	166.992	0	0	0	0		55.6641	0		-1
TGTGGCAGTGAAAATGTTGAATGTGACAGCACCTACACCTCCGTTACAAGCCTTCAAAAATGAAGTAGGAGTACTCAGGTGAGCTTGTGTGAATTACTCTTTTCCAGAGAAAGAAGTTATTTTTATTAGCT	VAVKMLNVTAPTPPLQAFKNEVGVLR*ACVNYSFPEKEVIFIS	6	7	6	4	1	7		57.7617	58.4473	50.5642	39.1512	8.81943	63.1325		55.5911	37.0344		1.50107
TGTGGCAGTGAAAATGTTGAATGTGACAGCACCTACACCTCAGTTACAAGCCTTCAAAAATGAAGTAGGAGTACTCAGGTGAGCTTGTGTGAATTACTCTTTTCCAGAGAAAGAAGTTATTGTTATTAGCT	VAVKMLNVTAPTPQLQAFKNEVGVLR*ACVNYSFPEKEVIVIS	5	8	6	0	3	5		48.1348	66.7969	50.5642	0	26.4583	45.0946		55.1653	23.851		2.31292
TGTGGCAGTGAAAATGTTGAATGTGACAGCACCTCCACCTCAGTTACAAGCCTTCAAAAATGAAGTAGGAGTACTCAGGTGAGCTTGTGTGAATTACTCTTTTCCAGAGAAAGAAGTTATTTTTATTAGCT	VAVKMLNVTAPPPQLQAFKNEVGVLR*ACVNYSFPEKEVIFIS	5	10	4	0	0	4		48.1348	83.4962	33.7095	0	0	36.0757		55.1135	12.0252		4.58315
TGTGGCAGTGAAAATGTTGAATGTGCCAGCACCTACACCTCAGTTACAAGCCTTCAAAAATGAAGTAGGAGTACTCAGGTGAGCTTGTGTGAATTACTCTTTTCCAGAGAAAGAAGTTATTTTTATTAGCT	VAVKMLNVPAPTPQLQAFKNEVGVLR*ACVNYSFPEKEVIFIS	4	2	13	4	2	1		38.5078	16.6992	109.556	39.1512	17.6389	9.01892		54.9209	21.9363		2.50365
TGTGGCAGTGAAAATGTTGAATGTGACAGCACCTACACCTCAGTTACACCTCAGTTACAAGCCTTCAAAAATGAAGTAGGAGTACTCAGGTGAGCTTGTGTGAATTACTCTTTTCCAGAGAAAGAAGTTAT	VAVKMLNVTAPTPQLHLSYKPSKMK*EYSGELV*ITLFQRKKL	4	4	11	7	5	15		38.5078	33.3985	92.7011	68.5146	44.0972	135.284		54.8691	82.6319		0.664019
TGTGGCAGTGAAAATGTTGAATGTGACAGCACCTACAAAAGCCTTCAAAAATGAAGTAGGAGTACTCAGGTGAGCTTGTGTGAATTACTCTTTTCCAGAGAAAGAAGTTATTTTTATTAGCTCCTGGTTCC	VAVKMLNVTAPTKAFKNEVGVLR*ACVNYSFPEKEVIFISSWF	11	6	1	2	2	3		105.897	50.0977	8.42737	19.5756	17.6389	27.0568		54.8072	21.4237		2.55825
TGTGGCAGTGAAAATGTTGAATGTGACAGCACCTACACCTTGTAACCTACAGTTACAAGCCTTCAAAAATGAAGTAGGAGTACTCAGGTGAGCTTGTGTGAATTACTCTTTTCCAGAGAAAGAAGTTATTT	VAVKMLNVTAPTPCNLQLQAFKNEVGVLR*ACVNYSFPEKEVI	4	11	4	2	2	0		38.5078	91.8458	33.7095	19.5756	17.6389	0		54.6877	12.4048		4.40858
TGTGGCAGTGAAAATGTTGAATGTGACATCAGTTACAAGCCTTCAAAAATGAAGTAGGAGTACTCAGGTGAGCTTGTGTGAATTACTCTTTTCCAGAGAAAGAAGTTATTTTTATTAGCTCCTGGTTCCCA	VAVKMLNVTSVTSLQK*SRSTQVSLCELLFSRERSYFY*LLVP	17	0	0	2	11	2		163.658	0	0	19.5756	97.0137	18.0378		54.5527	44.8757		1.21564
TGTGGCAGTGAAAATGTTGAATGTGACAGCACCTACACCTCAGAGGTAGTTACAAGCCTTCAAAAATGAAGTAGGAGTACTCAGGTGAGCTTGTGTGAATTACTCTTTTCCAGAGAAAGAAGTTATTTTTA	VAVKMLNVTAPTPQR*LQAFKNEVGVLR*ACVNYSFPEKEVIF	17	0	0	2	0	0		163.658	0	0	19.5756	0	0		54.5527	6.5252		8.36032
TGTGGCAGTGAAAATGTTGAATGGATTACAAGCCTTCAAAAATGAAGTAGGAGTACTCAGGTGAGCTTGTGTGAATTACTCTTTTCCAGAGAAAGAAGTTATTTTTATTAGCTCCTGGTTCCCAGTGGACA	VAVKMLNGLQAFKNEVGVLR*ACVNYSFPEKEVIFISSWFPVD	17	0	0	0	0	0		163.658	0	0	0	0	0		54.5527	0		-1
TGTGGCAGTGAAAATGTTGAATGTGACAGCGCCTTCAAAAATGAAGTAGGAGTACTCAGGTGAGCTTGTGTGAATTACTCTTTTCCAGAGAAAGAAGTTATTTTTATTAGCTCCTGGTTCCCAGTGGACAG	VAVKMLNVTAPSKMK*EYSGELV*ITLFQRKKLFLLAPGSQWT	10	3	5	10	2	8		96.2696	25.0488	42.1368	97.878	17.6389	72.1514		54.4851	62.5561		0.87098
TGTGGCAGTGAAAATGTTGAATGTGACAGCACCTACACCTCAGTTACAAGCCTTCAAAAATGAAGTAGGAGTACTCAGGTGAGCTTTTGTGAATTACTCTTTTCCAGAGAAAGAAGTTATTTTTATTAGCT	VAVKMLNVTAPTPQLQAFKNEVGVLR*AFVNYSFPEKEVIFIS	3	8	8	3	0	2		28.8809	66.7969	67.4189	29.3634	0	18.0378		54.3656	15.8004		3.44077
TGTGGCAGTGAAAATGTTGAATGTGACAGCACCTACACCTCAGTTACAAGCCTTCAAAATGTTACAAGCCTTCAAAAATGAAGTAGGAGTACTCAGGTGAGCTTGTGTGAATTACTCTTTTCCAGAGAAAG	VAVKMLNVTAPTPQLQAFKMLQAFKNEVGVLR*ACVNYSFPEK	16	0	1	0	1	1		154.031	0	8.42737	0	8.81943	9.01892		54.1529	5.94612		9.10727
TGTGGCAGTGAAAATGTTGAATGTGACAGCACCTACTCAGGTGAGCTTGTGTGAATTACTCTTTTCCAGAGAAAGAAGTTATTTTTATTAGCTCCTGGTTCCCAGTGGACAGTGCAGGGGAAAGAATAGTA	VAVKMLNVTAPTQVSLCELLFSRERSYFY*LLVPSGQCRGKNS	9	4	5	9	33	29		86.6426	33.3985	42.1368	88.0902	291.041	261.549		54.0593	213.56		0.253134
TGTGGCAGTGAAAATGTTGAATGTGACAGCACCTACACCTCAGTTACAAGCCTTCAAAAATGAAGTAGGAGTACTCAGGTGAGCTTGTGTGCATTACTCTTTTCCAGAGAAAGAAGTTATTTTTATTAGCT	VAVKMLNVTAPTPQLQAFKNEVGVLR*ACVHYSFPEKEVIFIS	2	5	12	0	0	8		19.2539	41.7481	101.128	0	0	72.1514		54.0435	24.0505		2.24709
TGTGGCAGTGAAAATGTTGAATGTGACAGCACCTACACCTCAGTTACAAGCCTTCAAAAATGAAGTAGGAGTACTCAGGTGAGCTAGTGTGAATTACTCTTTTCCAGAGAAAGAAGTTATTTTTATTAGCT	VAVKMLNVTAPTPQLQAFKNEVGVLR*ASVNYSFPEKEVIFIS	9	6	3	3	0	5		86.6426	50.0977	25.2821	29.3634	0	45.0946		54.0075	24.8193		2.17602
TGTGGCAGTGAAAATGTTGAATGTGACAGCACCCCAGTTACAAGCCTTCAAAAATGAAGTAGGAGTACTCAGGTGAGCTTGTGTGAATTACTCTTTTCCAGAGAAAGAAGTTATTTTTATTAGCTCCTGGT	VAVKMLNVTAPQLQAFKNEVGVLR*ACVNYSFPEKEVIFISSW	9	7	2	4	14	30		86.6426	58.4473	16.8547	39.1512	123.472	270.568		53.9815	144.397		0.373841
TGTGGCAGTGAAAATGTTGAATGTGACAGCACCTACATTACAAGCCTTCAAAAATGAAGTAGGAGTACTCAGGTGAGCTTGTGTGAATTACTCTTTTCCAGAGAAAGAAGTTATTTTTATTAGCTCCTGGT	VAVKMLNVTAPTLQAFKNEVGVLR*ACVNYSFPEKEVIFISSW	8	0	10	6	5	22		77.0156	0	84.2737	58.7268	44.0972	198.416		53.7631	100.413		0.535418
TGTGGCAGTGAAAATGTTGAATGTGACAGCACCTACACCTCAGTTACAAGCCTTCAAAAATGAAGTAGGAGTACTCAGGTGAGCTTGTGTGAATTACTCTTTTCCAGAGAAAGAAGTTATTTGTATTAGCT	VAVKMLNVTAPTPQLQAFKNEVGVLR*ACVNYSFPEKEVICIS	8	6	4	0	1	7		77.0156	50.0977	33.7095	0	8.81943	63.1325		53.6076	23.984		2.23514
TGTGGCAGTGAAAATGTTGAATGTGACAGCACCTACACCTCAGTGCAGTTACAAGCCTTCAAAAATGAAGTAGGAGTACTCAGGTGAGCTTGTGTGAATTACTCTTTTCCAGAGAAAGAAGTTATTTTTAT	VAVKMLNVTAPTPQCSYKPSKMK*EYSGELV*ITLFQRKKLFL	8	7	3	10	4	16		77.0156	58.4473	25.2821	97.878	35.2777	144.303		53.5817	92.4862		0.579348
TGTGGCAGTGAAAATGTTGAATGTGACAGCATTCAACAGACAGCCTTCAAAAATGAAGTAGGAGTACTCAGGTGAGCTTGTGTGAATTACTCTTTTCCAGAGAAAGAAGTTATTTTTATTAGCTCCTGGTT	VAVKMLNVTAFNRQPSKMK*EYSGELV*ITLFQRKKLFLLAPG	0	0	19	0	0	0		0	0	160.12	0	0	0		53.3733	0		-1
TGTGGCAGTGAAAATGTTGAATGTGACAGCACCTACACCCACAAGCCTTCAAAAATGAAGTAGGAGTACTCAGGTGAGCTTGTGTGAATTACTCTTTTCCAGAGAAAGAAGTTATTTTTATTAGCTCCTGG	VAVKMLNVTAPTPTSLQK*SRSTQVSLCELLFSRERSYFY*LL	0	2	17	0	2	2		0	16.6992	143.265	0	17.6389	18.0378		53.3215	11.8922		4.48372
TGTGGCAGTGAAAATGTTGAATGTGACAGCACCTACACCTCAGCAAGTAGGAGTACTCAGGTGAGCTTGTGTGAATTACTCTTTTCCAGAGAAAGAAGTTATTTTTATTAGCTCCTGGTTCCCAGTGGACA	VAVKMLNVTAPTPQQVGVLR*ACVNYSFPEKEVIFISSWFPVD	7	4	7	3	2	4		67.3887	33.3985	58.9916	29.3634	17.6389	36.0757		53.2596	27.6927		1.92324
TGTGGCAGTGAAAATGTTGAATGTGACAGCACCTACACCTCAGTGCTGAGGTTACAAGCCTTCAAAAATGAAGTAGGAGTACTCAGGTGAGCTTGTGTGAATTACTCTTTTCCAGAGAAAGAAGTTATTTT	VAVKMLNVTAPTPQC*GYKPSKMK*EYSGELV*ITLFQRKKLF	0	19	0	0	1	0		0	158.643	0	0	8.81943	0		52.8809	2.93981		17.9879
TGTGGCAGTGAAAATGTTGAATGTGACAGCACCTACACCTTCTTTGTTATGTTACAAGCCTTCAAAAATGAAGTAGGAGTACTCAGGTGAGCTTGTGTGAATTACTCTTTTCCAGAGAAAGAAGTTATTTT	VAVKMLNVTAPTPSLLCYKPSKMK*EYSGELV*ITLFQRKKLF	0	19	0	0	0	0		0	158.643	0	0	0	0		52.8809	0		-1
TGTGGCAGTGAAAATGTTGAATGTGACAGCACCTGAGTTACAAGCCTTCAAAAATGAAGTAGGAGTACTCAGGTGAGCTTGTGTGAATTACTCTTTTCCAGAGAAAGAAGTTATTTTTATTAGCTCCTGGT	VAVKMLNVTAPELQAFKNEVGVLR*ACVNYSFPEKEVIFISSW	0	19	0	0	0	0		0	158.643	0	0	0	0		52.8809	0		-1
TGTGGCAGTGAAAATGTTGAATGTGACAGCACCTACACCTCAGTTACAAGGCTTGTACAAGCCTTCAAAAATGAAGTAGGAGTACTCAGGTGAGCTTGTGTGAATTACTCTTTTCCAGAGAAAGAAGTTAT	VAVKMLNVTAPTPQLQGLYKPSKMK*EYSGELV*ITLFQRKKL	0	19	0	0	0	0		0	158.643	0	0	0	0		52.8809	0		-1
TGTGGCAGTGAAAATGTTGAATGTGACAGCACCTACACCTCAGTTACAAGCCTTCAAAAATGAAGTCGGAGTACTCAGGTGAGCTTGTGTGAATTACTCTTTTCCAGAGAAAGAAGTTATTTTTATTAGCT	VAVKMLNVTAPTPQLQAFKNEVGVLR*ACVNYSFPEKEVIFIS	6	7	5	1	0	0		57.7617	58.4473	42.1368	9.7878	0	0		52.782	3.2626		16.1779
TGTGGCAGTGAAAATGTTGAATGTGACAGCACCTACACCTCAGTTACAAGCCTTCAAAAATGAAGTAGGAGTACTCAGGTGAGCTTGTGTGAATTACTCTTTTCCAGAGAAAGAAGTTATTTTTATAGCTC	VAVKMLNVTAPTPQLQAFKNEVGVLR*ACVNYSFPEKEVIFIA	5	5	8	1	2	3		48.1348	41.7481	67.4189	9.7878	17.6389	27.0568		52.4339	18.1611		2.88715
TGTGGCAGTGAAAATGTTGAATGTGACAGCACCTACACCCAAGCCTTCAAAAATGAAGTAGGAGTACTCAGGTGAGCTTGTGTGAATTACTCTTTTCCAGAGAAAGAAGTTATTTTTATTAGCTCCTGGTT	VAVKMLNVTAPTPKPSKMK*EYSGELV*ITLFQRKKLFLLAPG	4	5	9	12	10	14		38.5078	41.7481	75.8463	117.454	88.1943	126.265		52.0341	110.638		0.470311
TGTGGCAGTGAAAATGTTGAATGTGACAGCACCTACACCTCAGTTACAAGCCTTCAAAAATGAAGTAGGAGTACTCAGGTGAGCTTGTGTGAATTACTCTTTTCCAGAGAAAGAAGTTATTTTTATTACCT	VAVKMLNVTAPTPQLQAFKNEVGVLR*ACVNYSFPEKEVIFIT	3	8	7	2	0	2		28.8809	66.7969	58.9916	19.5756	0	18.0378		51.5565	12.5378		4.11208
TGTGGCAGTGAAAATGTTGAATGTGACAGCACCTACACCTCAGTTACAAGCCTTCAAAAATGAAGTAGGAGTACTCAGGTGAGCTTGTGTGAATTACTCTTTTCCAGAGAAAGAAGTTACAAGCCTTCAAA	VAVKMLNVTAPTPQLQAFKNEVGVLR*ACVNYSFPEKEVTSLQ	3	11	4	2	0	1		28.8809	91.8458	33.7095	19.5756	0	9.01892		51.4787	9.53151		5.4009
TGTGGCAGTGAAAATGTTGAATGTGACAGCACATTGTTACAAGCCTTCAAAAATGAAGTAGGAGTACTCAGGTGAGCTTGTGTGAATTACTCTTTTCCAGAGAAAGAAGTTATTTTTATTAGCTCCTGGTT	VAVKMLNVTAHCYKPSKMK*EYSGELV*ITLFQRKKLFLLAPG	16	0	0	0	1	0		154.031	0	0	0	8.81943	0		51.3438	2.93981		17.465
TGTGGCAGTGAAAATGTTGAATGTGACAGCACCTACACCTCAGTTCTGTTACAAGCCTTCAAAAATGAAGTAGGAGTACTCAGGTGAGCTTGTGTGAATTACTCTTTTCCAGAGAAAGAAGTTATTTTTAT	VAVKMLNVTAPTPQFCYKPSKMK*EYSGELV*ITLFQRKKLFL	16	0	0	0	0	0		154.031	0	0	0	0	0		51.3438	0		-1
TGTGGCAGTGAAAATGTTGAATGTGACAGCACCTACACCTCAGTTACAAGTTACAAGCTACAAGTTACAAGTTACAAGTTACAAGCCTTCAAAAATGAAGTAGGACTACTCAGGTGAGCTTGTGTGAATTA	VAVKMLNVTAPTPQLQVTSYKLQVTSYKPSKMK*DYSGELV*I	16	0	0	0	0	0		154.031	0	0	0	0	0		51.3438	0		-1
TGTGGCAGTGAAAATGTTGAATGTGACAGCACCTACACCCAACATACAAGCCTTCAAAAATGAAGTAGGAGTACTCAGGTGAGCTTGTGTGAATTACTCTTTTCCAGAGAAAGAAGTTATTTTTATTAGCT	VAVKMLNVTAPTPNIQAFKNEVGVLR*ACVNYSFPEKEVIFIS	16	0	0	0	0	0		154.031	0	0	0	0	0		51.3438	0		-1
TGTGGCAGTGAAAATGTTGAATGTGACAGCACCTACACCTCAGCCTTCAAAAATGAAGTGGGAGTACTCAGGTGAGCTTGTGTGAATTACTCTTTTCCAGAGAAAGAAGTTATTTTTATTAGCTCCTGGTT	VAVKMLNVTAPTPQPSKMKWEYSGELV*ITLFQRKKLFLLAPG	2	7	9	5	4	10		19.2539	58.4473	75.8463	48.939	35.2777	90.1892		51.1825	58.1353		0.880403
TGTGGCAGTGAAAATGTTGACAGTTACAAGCCTTCAAAAATGAAGTAGGAGTACTCAGGTGAGCTTGTGTGAATTACTCTTTTCCAGAGAAAGAAGTTATTTTTATTAGCTCCTGGTTCCCAGTGGACAGT	VAVKMLTVTSLQK*SRSTQVSLCELLFSRERSYFY*LLVPSGQ	2	11	5	9	5	11		19.2539	91.8458	42.1368	88.0902	44.0972	99.2081		51.0788	77.1318		0.662228
TGTGGCAGTGAAAATGTTGAATGTGACAGCACCTACACCTCTTTTACAAGCCTTCAAAAATGAAGTAGGAGTACTCAGGTGAGCTTGTGTGAATTACTCTTTTCCAGAGAAAGAAGTTATTTTTATTAGCT	VAVKMLNVTAPTPLLQAFKNEVGVLR*ACVNYSFPEKEVIFIS	2	15	1	0	1	1		19.2539	125.244	8.42737	0	8.81943	9.01892		50.9752	5.94612		8.57285
TGTGGCAGTGAAAATGTTGAATGTGACAGCACCTACACCTCAGTTACAAGCCTTCAAAAATGAAGTAGGAGTACTCAGGTGAGCTTGTGTGAATTACTCTTTTCCAGAGAAAGAAGTTATATTTATTAGCT	VAVKMLNVTAPTPQLQAFKNEVGVLR*ACVNYSFPEKEVIFIS	8	2	7	1	1	1		77.0156	16.6992	58.9916	9.7878	8.81943	9.01892		50.9022	9.20872		5.5276
TGTGGCAGTGAAAATGTTGAATGTGACAGCACCTACAAAATGAAGTAGGAGTACTCAGGTGAGCTTGTGTGAATTACTCTTTTCCAGAGAAAGAAGTTATTTTTATTAGCTCCTGGTTCCCAGTGGACAGT	VAVKMLNVTAPTK*SRSTQVSLCELLFSRERSYFY*LLVPSGQ	1	8	9	8	10	23		9.62696	66.7969	75.8463	78.3024	88.1943	207.435		50.7567	124.644		0.407214
TGTGGCAGTGAAAATGTTGAATGTGACAGCACCTACACCTCAAACCTTCAAAAATGAAGTAGGAGTACTCAGGTGAGCTTGTGTGAATTACTCTTTTCCAGAGAAAGAAGTTATTTTTATTAGCTCCTGGT	VAVKMLNVTAPTPQTFKNEVGVLR*ACVNYSFPEKEVIFISSW	0	0	18	0	2	0		0	0	151.693	0	17.6389	0		50.5642	5.87962		8.59991
TGTGGCAGTGAAAATGTTGAATGTGACAGCACCTACACCTTCAACAGTTACAAGCCTTCAAAAATGAAGTAGGAGTACTCAGGTGAGCTTGTGTGAATTACTCTTTTCCAGAGAAAGAAGTTATTTTTATT	VAVKMLNVTAPTPSTVTSLQK*SRSTQVSLCELLFSRERSYFY	0	0	18	0	0	0		0	0	151.693	0	0	0		50.5642	0		-1
TGTGGCAGTGAAAATGTTGAATGTGACAGCACCTACACAAGCCTTCAAAATGTTACAAGCCTTCAAAAATGAAGTAGGAGTACTCAGGTGAGCTTGTGTGAATTACTCTTTTCCAGAGAAAGAAGTTATTT	VAVKMLNVTAPTQAFKMLQAFKNEVGVLR*ACVNYSFPEKEVI	0	0	18	0	0	0		0	0	151.693	0	0	0		50.5642	0		-1
TGTGGCAGTGAAAATGTTGAATGTGACAGCACCTACACAAAAATGAAGTAGGAGTACTCAGGTGAGCTTGTGTGAATTACTCTTTTCCAGAGAAAGAAGTTATTTTTATTAGCTCCTGGTTCCCAGTGGAC	VAVKMLNVTAPTQK*SRSTQVSLCELLFSRERSYFY*LLVPSG	0	14	4	5	2	6		0	116.895	33.7095	48.939	17.6389	54.1135		50.2014	40.2305		1.24784
TGTGGCAGTGAAAATGTTGAATGTGACAGCACCTACACCTCAGAATGTACAAGCCTTCAAAAATGAAGTAGGAGTACTCAGGTGAGCTTGTGTGAATTACTCTTTTCCAGAGAAAGAAGTTATTTTTATTA	VAVKMLNVTAPTPQNVQAFKNEVGVLR*ACVNYSFPEKEVIFI	0	18	0	0	0	0		0	150.293	0	0	0	0		50.0977	0		-1
TGTGGCAGTGAAAATGTTGTAATTTTGAAGTTACAAGCCTTCAAAAATGAAGTAGGAGTACTCAGGTGAGCTTGTGTGAATTACTCTTTTCCAGAGAAAGAAGTTATTTTTATTAGCTCCTGGTTCCCAGT	VAVKML*F*SYKPSKMK*EYSGELV*ITLFQRKKLFLLAPGSQ	0	18	0	0	0	0		0	150.293	0	0	0	0		50.0977	0		-1
TGTGGCAGTGAAAATGTTGAATGTGACAGCACCTACACAAGCTTGTTACAAGCCTTCAAAAATGAAGTAGGAGTACTCAGGTGAGCTTGTGTGAATTACTCTTTTCCAGAGAAAGAAGTTATTTTTATTAG	VAVKMLNVTAPTQACYKPSKMK*EYSGELV*ITLFQRKKLFLL	0	18	0	0	0	0		0	150.293	0	0	0	0		50.0977	0		-1
TGTGGCAGTGAAAATGTTGAATGTGACAGCACCTACACCTCAGTTACAAGCCTTCAAAAATGAAGTAGGAGTACTCAGGTGAGCTTGTGTGAATTACTCTTTTCCAGAGAAAGAATTTATTTTTATTAGCT	VAVKMLNVTAPTPQLQAFKNEVGVLR*ACVNYSFPEKEFIFIS	6	4	7	0	0	1		57.7617	33.3985	58.9916	0	0	9.01892		50.0506	3.00631		16.6485
TGTGGCAGTGAAAATGTTGAATGTGACAGCACCTACACCTTGTAACTGTTACAAGCCTTCAAAAATGAAGTAGGAGTACTCAGGTGAGCTTGTGTGAATTACTCTTTTCCAGAGAAAGAAGTTATTTTTAT	VAVKMLNVTAPTPCNCYKPSKMK*EYSGELV*ITLFQRKKLFL	6	8	3	2	0	15		57.7617	66.7969	25.2821	19.5756	0	135.284		49.9469	51.6198		0.967592
TGTGGCAGTGAAAATGTTGCATGTGACAGCACCTACACCTCAGTTACAAGCCTTCAAAAATGAAGTAGGAGTACTCAGGTGAGCTTGTGTGAATTACTCTTTTCCAGAGAAAGAAGTTATTTTTATTAGCT	VAVKMLHVTAPTPQLQAFKNEVGVLR*ACVNYSFPEKEVIFIS	5	4	8	1	2	7		48.1348	33.3985	67.4189	9.7878	17.6389	63.1325		49.6507	30.1864		1.64481
TGTGGCAGTGAATATGTTGAATGTGACAGCACCTACACCTCAGTTACAAGCCTTCAAAAATGAAGTAGGAGTACTCAGGTGAGCTTGTGTGAATTACTCTTTTCCAGAGAAAGAAGTTATTTTTATTAGCT	VAVNMLNVTAPTPQLQAFKNEVGVLR*ACVNYSFPEKEVIFIS	5	7	5	1	1	4		48.1348	58.4473	42.1368	9.7878	8.81943	36.0757		49.573	18.2276		2.71966
TGTGCAGTGAAAATGTTGAATGTGACAGCACCTACACCTCAGTTACAAGCCTTCAAAAATGAAGTAGGAGTACTCAGGTGAGCTTGTGTGAATTACTCTTTTCCAGAGAAAGAAGTTATTTTTATTAGCTC	VQ*KC*M*QHLHLSYKPSKMK*EYSGELV*ITLFQRKKLFLLA	4	6	7	1	1	3		38.5078	50.0977	58.9916	9.7878	8.81943	27.0568		49.199	15.2213		3.23224
TGTGGCAGTGAAAATGTTGAATGTGACAGCACCTACACCTCCAAAAATGAAGTAGGAGTACTCAGGTGAGCTTGTGTGAATTACTCTTTTCCAGAGAAAGAAGTTATTTTTATTAGCTCCTGGTTCCCAGT	VAVKMLNVTAPTPPKMK*EYSGELV*ITLFQRKKLFLLAPGSQ	4	7	6	6	19	16		38.5078	58.4473	50.5642	58.7268	167.569	144.303		49.1731	123.533		0.398057
TGTGGCAGTGAAAATGTTGAATGTGACAGCACCTACACCTCAGTTACAAGCCTTCAAAAATGAAGTAGGAGTACTCAGCTGAGCTTGTGTGAATTACTCTTTTCCAGAGAAAGAAGTTATTTTTATTAGCT	VAVKMLNVTAPTPQLQAFKNEVGVLS*ACVNYSFPEKEVIFIS	4	9	4	2	2	3		38.5078	75.1465	33.7095	19.5756	17.6389	27.0568		49.1213	21.4237		2.29284
TGTGGCAGTGAAAATGTTGAATGTGACAGCACCTACACCTCAGCATTTACAAGCCTTCAAAAATGAAGTAGGAGTACTCAGGTGAGCTTGTGTGAATTACTCTTTTCCAGAGAAAGAAGTTATTTTTATTA	VAVKMLNVTAPTPQHLQAFKNEVGVLR*ACVNYSFPEKEVIFI	3	10	4	6	8	2		28.8809	83.4962	33.7095	58.7268	70.5554	18.0378		48.6955	49.1067		0.991626
TGTGGCAGTGAAAATGTTGAATGTGACAGCACCTACACCTACACCTACAAGCCTTCAAAAATGAAGTAGGAGTACTCAGGTGAGCTTGTGTGAATTACTCTTTTCCAGAGAAAGAAGTTATTTTTATTAGC	VAVKMLNVTAPTPTPTSLQK*SRSTQVSLCELLFSRERSYFY*	9	1	6	5	12	29		86.6426	8.34962	50.5642	48.939	105.833	261.549		48.5188	138.774		0.349626
TGTGGCAGTGAAAATGTTGAATGTGACAGCACCTACACCTCAGCATCAAAAATGAAGTAGGAGTACTCAGGTGAGCTTGTGTGAATTACTCTTTTCCAGAGAAAGAAGTTATTTTTATTAGCTCCTGGTTC	VAVKMLNVTAPTPQHQK*SRSTQVSLCELLFSRERSYFY*LLV	2	2	13	3	7	19		19.2539	16.6992	109.556	29.3634	61.736	171.36		48.503	87.4863		0.554406
TGTGGCAGTGAAAATGTTGAATGTGACAGCACCTACAAAGCAGTTACAAGCCTTCAAAAATGAAGTAGGAGTACTCAGGTGAGCTTGTGTGAATTACTCTTTTCCAGAGAAAGAAGTTATTTTTATTAGCT	VAVKMLNVTAPTKQLQAFKNEVGVLR*ACVNYSFPEKEVIFIS	2	3	12	0	2	1		19.2539	25.0488	101.128	0	17.6389	9.01892		48.4771	8.88593		5.45549
TGTGGCAGTGAAAATGTTGAAGCAGTTACAAGCCTTCAAAAATGAAGTAGGAGTACTCAGGTGAGCTTGTGTGAATTACTCTTTTCCAGAGAAAGAAGTTATTTTTATTAGCTCCTGGTTCCCAGTGGACA	VAVKMLKQLQAFKNEVGVLR*ACVNYSFPEKEVIFISSWFPVD	1	0	16	0	0	0		9.62696	0	134.838	0	0	0		48.155	0		-1
TGTGGCAGTGAAAATGTTGAATGTGACAGCACCTACACCTCAAAAATTACAATTACAAGCCTTCAAAAATGAAGTAGGAGTACTCAGGTGAGCTTGTGTGAATTACTCTTTTCCAGAGAAAGAAGTTATTT	VAVKMLNVTAPTPQKLQLQAFKNEVGVLR*ACVNYSFPEKEVI	15	0	0	0	0	0		144.404	0	0	0	0	0		48.1348	0		-1
TGTGGCAGTGAAAATGTTGAATGTGACAGCACCTACACCTCATTCAAGCCTTCAAAAATGAAGTAGGAGTACTCAGGTGAGCTTGTGTGAATTACTCTTTTCCAGAGAAAGAAGTTATTTTTATTAGCTCC	VAVKMLNVTAPTPHSSLQK*SRSTQVSLCELLFSRERSYFY*L	15	0	0	0	0	0		144.404	0	0	0	0	0		48.1348	0		-1
TGTGGCAGTGAAAATGTTGAATGTGACAGCACCTACACCTCAACAACAAGCCTTCAAAAATGAAGTAGGAGTACTCAGGTGAGCTTGTGTGAATTACTCTTTTCCAGAGAAAGAAGTTATTTTTATTAGCT	VAVKMLNVTAPTPQQQAFKNEVGVLR*ACVNYSFPEKEVIFIS	0	0	17	0	0	0		0	0	143.265	0	0	0		47.7551	0		-1
TGTGGCAGTGAAAATGTTGAATGTGACAGCACTCAGGTGAGCTTGTGTGAATTACTCTTTTCCAGAGAAAGAAGTTATTTTTATTAGCTCCTGGTTCCCAGTGGACAGTGCAGGGGAAAGAATAGTAGAAG	VAVKMLNVTALR*ACVNYSFPEKEVIFISSWFPVDSAGERIVE	7	3	6	3	2	23		67.3887	25.0488	50.5642	29.3634	17.6389	207.435		47.6672	84.8125		0.562031
TGTGGCAGTGAAAATGTTGAATGTGACAGCACCTACACCTCAGTTACAAGCCTTCAAAAATGAAGTAGGAGTACTCAGGTGAGCTTGTGTGAATTACTCTGTTCCAGAGAAAGAAGTTATTTTTATTAGCT	VAVKMLNVTAPTPQLQAFKNEVGVLR*ACVNYSVPEKEVIFIS	7	9	0	1	0	2		67.3887	75.1465	0	9.7878	0	18.0378		47.5117	9.27521		5.12244
TGTGGCAGTGAAAATGTTGAATGTGACAGCACCTACACCTACAGCCTTCAAAAATGAAGTAGGAGTACTCAGGTGAGCTTGTGTGAATTACTCTTTTCCAGAGAAAGAAGTTATTTTTATTAGCTCCTGGT	VAVKMLNVTAPTPTAFKNEVGVLR*ACVNYSFPEKEVIFISSW	0	14	3	0	0	1		0	116.895	25.2821	0	0	9.01892		47.3922	3.00631		15.7643
TGTGGCAGTGAAAATGTTGAATGTGACAGCACCAAAAATGAAGTAGGAGTACTCAGGTGAGCTTGTGTGAATTACTCTTTTCCAGAGAAAGAAGTTATTTTTATTAGCTCCTGGTTCCCAGTGGACAGTGC	VAVKMLNVTAPKMK*EYSGELV*ITLFQRKKLFLLAPGSQWTV	0	17	0	5	2	15		0	141.943	0	48.939	17.6389	135.284		47.3145	67.2872		0.703172
TGTGGCAGTGAAAATGTTGAATGTGACAGCACCTACACCTCAGCATAAGCCTTCAAAAATGAAGTAGGAGTACTCAGGTGAGCTTGTGTGAATTACTCTTTTCCAGAGAAAGAAGTTATTTTTATTAGCTC	VAVKMLNVTAPTPQHKPSKMK*EYSGELV*ITLFQRKKLFLLA	0	17	0	1	3	3		0	141.943	0	9.7878	26.4583	27.0568		47.3145	21.101		2.24229
TGTGGCAGGTGAGCTTGTGTGAATTACTCTTTTCCAGAGAAAGAAGTTATTTTTATTAGCTCCTGGTTCCCAGTGGACAGTGCAGGGGAAAGAATAGTAGAAGATCGGAAGAGCACACGTCTGAACTCCAG	VAGELV*ITLFQRKKLFLLAPGSQWTVQGKE**KIGRAHV*TP	0	17	0	0	1	5		0	141.943	0	0	8.81943	45.0946		47.3145	17.9713		2.63277
TGTGGCAGTGAAAATGTTGAATGTGACAGCACCTACACCTCAGCCTATTTTTGAAGTACAAGCCTTCAAAAATGAAGTAGGAGTACTCAGGTGAGCTTGTGTGAATTACTCTTTTCCAGAGAAAGAAGTTA	VAVKMLNVTAPTPQPIFEVQAFKNEVGVLR*ACVNYSFPEKEV	0	17	0	0	0	0		0	141.943	0	0	0	0		47.3145	0		-1
TGTGGCAGTGAAAATGTTGAATGTGACAGCACCTACACCTCAAAATGTTACAAGCCTTCAAAAATGAAGTAGGAGTACTCAGGTGAGCTTGTGTGAATTACTCTTTTCCAGAGAAAGAAGTTATTTTTATT	VAVKMLNVTAPTPQNVTSLQK*SRSTQVSLCELLFSRERSYFY	13	1	1	11	11	8		125.15	8.34962	8.42737	107.666	97.0137	72.1514		47.3091	92.277		0.512686
TGTGGCAGTGAAAATGTTGAATGTGACAGCACCTACACCTCAGCAAGCCTTCAAAATGAAGTAGGAGTACTCAGGTGAGCTTGTGTGAATTACTCTTTTCCAGAGAAAGAAGTTATTTTTATTAGCTCCTG	VAVKMLNVTAPTPQQAFKMK*EYSGELV*ITLFQRKKLFLLAP	12	2	1	1	0	8		115.523	16.6992	8.42737	9.7878	0	72.1514		46.8834	27.3131		1.71652
TGTGGCAGTGAAAATGTTGAATGTGACAGCACCTACACCTCAGTTACAAGCCTTCAAAAATGAAGTAGGAGTACTCAGGTGAGCTTGTGTGAATTACTCTTTTCCAGAGAAAGAAGTTATTTTTATTTGCT	VAVKMLNVTAPTPQLQAFKNEVGVLR*ACVNYSFPEKEVIFIC	5	7	4	2	2	6		48.1348	58.4473	33.7095	19.5756	17.6389	54.1135		46.7639	30.4427		1.53613
TGTGGCAGTGAAAATGTTGAATGTGACAGCACCTACACCTCAGTTACAAGCCTTCAAAAATGAAGTAGGAGTACTCAGGTGAGCTTGTGTGAATTACTCTTTTCCAGAGAAAGAAGTGATTTTTATTAGCT	VAVKMLNVTAPTPQLQAFKNEVGVLR*ACVNYSFPEKEVIFIS	5	7	4	0	0	3		48.1348	58.4473	33.7095	0	0	27.0568		46.7639	9.01892		5.18508
TGTGGCAGTGAAAATGTTGAATGTGACAGCACCTACACCTCAGCCTACAAGCCTTCAAAAATGAAGTAGGAGTACTCAGGTGAGCTTGTGTGAATTACTCTTTTCCAGAGAAAGAAGTTATTTTTATTAGC	VAVKMLNVTAPTPQPTSLQK*SRSTQVSLCELLFSRERSYFY*	5	10	1	1	8	10		48.1348	83.4962	8.42737	9.7878	70.5554	90.1892		46.6861	56.8442		0.8213
TGTGGCAGTGAAAATGTTGAATGTGACAGCACCTACACCTCAGCACAAAAATGAAGTAGGAGTACTCAGGTGAGCTTGTGTGAATTACTCTTTTCCAGAGAAAGAAGTTATTTTTATTAGCTCCTGGTTCC	VAVKMLNVTAPTPQHKNEVGVLR*ACVNYSFPEKEVIFISSWF	4	6	6	3	8	15		38.5078	50.0977	50.5642	29.3634	70.5554	135.284		46.3899	78.4009		0.591701
TGTGGCCGTGAAAATGTTGAATGTGACAGCACCTACACCTCAGTTACAAGCCTTCAAAAATGAAGTAGGAGTACTCAGGTGAGCTTGTGTGAATTACTCTTTTCCAGAGAAAGAAGTTATTTTTATTAGCT	VAVKMLNVTAPTPQLQAFKNEVGVLR*ACVNYSFPEKEVIFIS	4	7	5	0	2	1		38.5078	58.4473	42.1368	0	17.6389	9.01892		46.364	8.88593		5.21769
TGTGGCAGTGAAAATGTTGAATGTGACAGCACCTACACCTCAGTTACAAGCCTTCAAAAATGAAGTAGGAGTACTCAGGTGAGCTTGTGTGAATTACTCGTTTCCAGAGAAAGAAGTTATTTTTATTAGCT	VAVKMLNVTAPTPQLQAFKNEVGVLR*ACVNYSFPEKEVIFIS	4	8	4	1	0	1		38.5078	66.7969	33.7095	9.7878	0	9.01892		46.3381	6.26891		7.39173
TGTGGCAGTGAAAATGTTGAATGTGACAGCACCTACACCTTCAAAAATGAAGTAGGAGTACTCGGGTGAGCTTGTGTGAATTACTCTTTTCCAGAGAAAGAAGTTATTTTTATTAGCTCCTGGTTCCCAGT	VAVKMLNVTAPTPSKMK*EYSGELV*ITLFQRKKLFLLAPGSQ	4	11	1	4	1	6		38.5078	91.8458	8.42737	39.1512	8.81943	54.1135		46.2603	34.0281		1.35948
TGTGGCAGTGAAAATGTTGAATGTGACAGCACCGCAGTTACAAGCCTTCAAAAATGAAGTAGGAGTACTCAGGTGAGCTTGTGTGAATTACTCTTTTCCAGAGAAAGAAGTTATTTTTATTAGCTCCTGGT	VAVKMLNVTAPQLQAFKNEVGVLR*ACVNYSFPEKEVIFISSW	4	12	0	0	1	2		38.5078	100.195	0	0	8.81943	18.0378		46.2344	8.95242		5.16446
TGTGGCAGTGAAAATGTTGAATGTGACAGCACCTACACCTCAAGCCTTCAAAAATGAAGTAGGGGTACTCAGGTGAGCTTGTGTGAATTACTCTTTTCCAGAGAAAGAAGTTATTTTTATTAGCTCCTGGT	VAVKMLNVTAPTPQAFKNEVGVLR*ACVNYSFPEKEVIFISSW	3	4	9	2	2	9		28.8809	33.3985	75.8463	19.5756	17.6389	81.1703		46.0419	39.4616		1.16675
TGTGGCAGTGAAAATGTTGAATGTGACAGCACCTACACCTCAGTTACAAGCCTTCTAAAATGAAGTAGGAGTACTCAGGTGAGCTTGTGTGAATTACTCTTTTCCAGAGAAAGAAGTTATTTTTATTAGCT	VAVKMLNVTAPTPQLQAF*NEVGVLR*ACVNYSFPEKEVIFIS	3	4	9	1	0	3		28.8809	33.3985	75.8463	9.7878	0	27.0568		46.0419	12.2815		3.74887
TGTGGCAGTGAAAATGTTGAATGTGACAGCACCTACACCTCAGCAGAAGTAGGAGTACTCAGGTGAGCTTGTGTGAATTACTCTTTTCCAGAGAAAGAAGTTATTTTTATTAGCTCCTGGTTCCCAGTGGA	VAVKMLNVTAPTPQQK*EYSGELV*ITLFQRKKLFLLAPGSQW	9	1	5	8	3	23		86.6426	8.34962	42.1368	78.3024	26.4583	207.435		45.7097	104.065		0.43924
TGTGGCAGTGAAAATGTTGAATGTGACAGCACCTACACCTGAGGTTACAAGCCTTCAAAAATGAAGTAGGAGTACTCAGGTGAGCTTGTGTGAATTACTCTTTTCCAGAGAAAGAAGTTATTTTTATTAGC	VAVKMLNVTAPTPEVTSLQK*SRSTQVSLCELLFSRERSYFY*	1	3	12	0	5	15		9.62696	25.0488	101.128	0	44.0972	135.284		45.2681	59.7937		0.757071
TGTGGCAGTGAAAATGTTGAATGTGACAGAGTACTCAGGTGAGCTTGTGTGAATTACTCTTTTCCAGAGAAAGAAGTTATTTTTATTAGCTCCTGGTTCCCAGTGGACAGTGCAGGGGAAAGAATAGTAGA	VAVKMLNVTEYSGELV*ITLFQRKKLFLLAPGSQWTVQGKE**	0	0	16	8	4	0		0	0	134.838	78.3024	35.2777	0		44.946	37.86		1.18716
TGTGGCAGTGAAAATGTTGAATGTGACAGCACCTACACCTCAGGTGTAGTGAGGTGTAGGTGCTTGTAACAAGCCTTCAAAATGAAGTAGGAGTACTCAGGTGAGCTTGTGTGAATTACTCTTTTCCAGAG	VAVKMLNVTAPTPQV**GVGACNKPSK*SRSTQVSLCELLFSR	0	0	16	0	0	0		0	0	134.838	0	0	0		44.946	0		-1
TGTGGCAGTGAAAATGTTGAATGTGACAGCACCTACACCTCAGAGGCTTGTACAAGCCTTCAAAAATGAAGTAGGAGTACTCAGGTGAGCTTGTGTGAATTACTCTTTTCCAGAGAAAGAAGTTATTTTTA	VAVKMLNVTAPTPQRLVQAFKNEVGVLR*ACVNYSFPEKEVIF	0	0	16	0	0	0		0	0	134.838	0	0	0		44.946	0		-1
TGTGGCAGTGAAAATGTTGAATGTGACAGCACCTTCACAATGAAGTAGGAGTACTCAGGTGAGCTTGTGTGAATTACTCTTTTCCAGAGAAAGAAGTTATTTTTATTAGCTCCTGGTTCCCAGTGGACAGT	VAVKMLNVTAPSQ*SRSTQVSLCELLFSRERSYFY*LLVPSGQ	0	0	16	0	0	0		0	0	134.838	0	0	0		44.946	0		-1
TGTGGCAGTGAAAATGTTGAATGTGACAGCACCTTGTTACAAGCCTTCAAAAATGAAGTAGGAGTACTCAGGTGAGCTTGTGTGAATTACTCTTTTCCAGAGAAAGAAGTTATTTTTATTAGCTCCTGGTT	VAVKMLNVTAPCYKPSKMK*EYSGELV*ITLFQRKKLFLLAPG	14	0	0	1	10	2		134.777	0	0	9.7878	88.1943	18.0378		44.9258	38.6733		1.16167
TGTGGCAGTGAAAATGTTGAATGTGACAGCACCTACTGAGTAGGAGTACTCAGGTGAGCTTGTGTGAATTACTCTTTTCCAGAGAAAGAAGTTATTTTTATTAGCTCCTGGTTCCCAGTGGACAGTGCAGG	VAVKMLNVTAPTE*EYSGELV*ITLFQRKKLFLLAPGSQWTVQ	14	0	0	2	0	0		134.777	0	0	19.5756	0	0		44.9258	6.5252		6.88497
TGTGGCAGTGAAAATGTTGAATGTGACAGCACCTACACCTCAGTTCACAAGCCTTCAAAAATGAAGTAGGAGTACTCAGGTGAGCTTGTGTGAATTACTCTTTTCCAGAGAAAGAAGTTATTTTTATTAGC	VAVKMLNVTAPTPQFTSLQK*SRSTQVSLCELLFSRERSYFY*	14	0	0	0	0	0		134.777	0	0	0	0	0		44.9258	0		-1
TGTGGCAGTGAAAATGTTGAATGTGACAGCACCTACGAAGTAGGAGTACTCAGGTGAGCTTGTGTGAATTACTCTTTTCCAGAGAAAGAAGTTATTTTTATTAGCTCCTGGTTCCCAGTGGACAGTGCAGG	VAVKMLNVTAPTK*EYSGELV*ITLFQRKKLFLLAPGSQWTVQ	7	1	7	2	5	13		67.3887	8.34962	58.9916	19.5756	44.0972	117.246		44.91	60.3062		0.744698
TGTGGCAGTGAAAATGTTGAATGTGACAGCACCTACACCTCAGTACTCAGGTGAGCTTGTGTGAATTACTCTTTTCCAGAGAAAGAAGTTATTTTTATTAGCTCCTGGTTCCCAGTGGACAGTGCAGGGGA	VAVKMLNVTAPTPQYSGELV*ITLFQRKKLFLLAPGSQWTVQG	7	5	3	13	11	22		67.3887	41.7481	25.2821	127.241	97.0137	198.416		44.8063	140.89		0.318022
TGTGGCAGTGAAAATTGAAGGCTTGTGTTACAAGCCTTCAAAAATGAAGTAGGAGTACTCAGGTGAGCTTGTGTGAATTACTCTTTTCCAGAGAAAGAAGTTATTTTTATTAGCTCCTGGTTCCCAGTGGA	VAVKIEGLCYKPSKMK*EYSGELV*ITLFQRKKLFLLAPGSQW	0	16	0	0	0	0		0	133.594	0	0	0	0		44.5313	0		-1
TGTGGCAGTGAAAATGTTGAATGTGACAGCACCTACACCTCAAAAATGTCAGTTACAAGCCTTCAAAAATGAAGTAGGAGTACTCAGGTGAGCTTGTGTGAATTACTCTTTTCCAGAGAAAGAAGTTATTT	VAVKMLNVTAPTPQKCQLQAFKNEVGVLR*ACVNYSFPEKEVI	0	16	0	0	0	0		0	133.594	0	0	0	0		44.5313	0		-1
TGTGGCAGTGAAAATGTTGAATGTGACAGCACCTACACCTCAGTTACAAGCCTTCAAAAATGAAGTAGGAGTACTCAGGTGAGCTTGTGTGAATTACTCTTTTCCAGAGAAAGAAGTTAGTTTTATTAGCT	VAVKMLNVTAPTPQLQAFKNEVGVLR*ACVNYSFPEKEVSFIS	6	5	4	1	0	1		57.7617	41.7481	33.7095	9.7878	0	9.01892		44.4064	6.26891		7.0836
TGTGGCAGTGAAAATGTTGAATGTGACAGCACCTACACCTCAAAAAAAGTTACAAGCCTTCAAAAATGAAGTAGGAGTACTCAGGTGAGCTTGTGTGAATTACTCTTTTCCAGAGAAAGAAGTTATTTTTA	VAVKMLNVTAPTPQKKLQAFKNEVGVLR*ACVNYSFPEKEVIF	6	8	1	1	0	2		57.7617	66.7969	8.42737	9.7878	0	18.0378		44.3287	9.27521		4.77926
TGTGGCAGTGAAAATGTTGAATGTGACAGCACCTACACCTCAGCACCTTCAAAAATGAAGTAGGAGTACTCAGGTGAGCTTGTGTGAATTACTCTTTTCCAGAGAAAGAAGTTATTTTTATTAGCTCCTGG	VAVKMLNVTAPTPQHLQK*SRSTQVSLCELLFSRERSYFY*LL	5	4	6	2	3	11		48.1348	33.3985	50.5642	19.5756	26.4583	99.2081		44.0325	48.414		0.909499
TGTGCCAGTGAAAATGTTGAATGTGACAGCACCTACACCTCAGTTACAAGCCTTCAAAAATGAAGTAGGAGTACTCAGGTGAGCTTGTGTGAATTACTCTTTTCCAGAGAAAGAAGTTATTTTTATTAGCT	VPVKMLNVTAPTPQLQAFKNEVGVLR*ACVNYSFPEKEVIFIS	5	4	6	2	2	1		48.1348	33.3985	50.5642	19.5756	17.6389	9.01892		44.0325	15.4111		2.85719
TGTGGCAGTGAAAATGTTGAATGTGACAGCGCAGTTACAAGCCTTCAAAAATGAAGTAGGAGTACTCAGGTGAGCTTGTGTGAATTACTCTTTTCCAGAGAAAGAAGTTATTTTTATTAGCTCCTGGTTCC	VAVKMLNVTAQLQAFKNEVGVLR*ACVNYSFPEKEVIFISSWF	11	2	1	1	1	5		105.897	16.6992	8.42737	9.7878	8.81943	45.0946		43.6744	21.2339		2.05682
TGTGGCAGTGAAAATGTTGAATGTGACAGCACCTTCACCTCAGTTACAAGCCTTCAAAAATGAAGTAGGAGTACTCAGGTGAGCTTGTGTGAATTACTCTTTTCCAGAGAAAGAAGTTATTTTTATTAGCT	VAVKMLNVTAPSPQLQAFKNEVGVLR*ACVNYSFPEKEVIFIS	4	9	2	1	1	5		38.5078	75.1465	16.8547	9.7878	8.81943	45.0946		43.503	21.2339		2.04875
TGTGGCAGTGAAAATGTTGAATGTGACAGCACCTACACCTCAAAATGCCTTCAAAAATGAAGTAGGAGTACTCAGGTGAGCTTGTGTGAATTACTCTTTTCCAGAGAAAGAAGTTATTTTTATTAGCTCCT	VAVKMLNVTAPTPQNAFKNEVGVLR*ACVNYSFPEKEVIFISS	3	0	12	0	3	0		28.8809	0	101.128	0	26.4583	0		43.3364	8.81943		4.91374
TGTGGCAGTGAAAATGTTGAATCTGACAGCACCTACACCTCAGTTACAAGCCTTCAAAAATGAAGTAGGAGTACTCAGGTGAGCTTGTGTGAATTACTCTTTTCCAGAGAAAGAAGTTATTTTTATTAGCT	VAVKMLNLTAPTPQLQAFKNEVGVLR*ACVNYSFPEKEVIFIS	10	3	1	0	0	0		96.2696	25.0488	8.42737	0	0	0		43.2486	0		-1
TGTGGCAGTGAAAATGTTGAATGTGACAGCACCTACACCTCCAGTTACAAGCCTTCAAAATGAAGTAGGAGTACTCAGGTGAGCTTGTGTGAATTACTCTTTTCCAGAGAAAGAAGTTATTTTTATTAGCT	VAVKMLNVTAPTPPVTSLQNEVGVLR*ACVNYSFPEKEVIFIS	9	1	4	3	4	5		86.6426	8.34962	33.7095	29.3634	35.2777	45.0946		42.9006	36.5786		1.17283
TGTGGCAGTGAAAATGTTGAATGTGACAGCACCTACACCTCAGTTTTACAAGCCTTCAAAAATGAAGTAGGAGTACTCAGGTGAGCTTGTGTGAATTACTCTTTTCCAGAGAAAGAAGTTATTTTTATTAG	VAVKMLNVTAPTPQFYKPSKMK*EYSGELV*ITLFQRKKLFLL	9	2	3	10	5	18		86.6426	16.6992	25.2821	97.878	44.0972	162.341		42.8746	101.439		0.422666
TGTGGCAGTGAAAATGTTGAATGTGACAGCACCTACACCTCACCAGTTACAAGCCTTCAAAAATGAAGTAGGAGTACTCAGGTGAGCTTGTGTGAATTACTCTTTTCCAGAGAAAGAAGTTATTTTTATTA	VAVKMLNVTAPTPHQLQAFKNEVGVLR*ACVNYSFPEKEVIFI	2	6	7	25	18	21		19.2539	50.0977	58.9916	244.695	158.75	189.397		42.7811	197.614		0.216488
TGTGGCAGTGAAAATGTTGAATGTGAAGCCTTCAAAAATGAAGTAGGAGTACTCAGGTGAGCTTGTGTGAATTACTCTTTTCCAGAGAAAGAAGTTATTTTTATTAGCTCCTGGTTCCCAGTGGACAGTGC	VAVKMLNVKPSKMK*EYSGELV*ITLFQRKKLFLLAPGSQWTV	2	11	2	8	7	19		19.2539	91.8458	16.8547	78.3024	61.736	171.36		42.6515	103.799		0.410903
TGTGGCAGTGAAAATGTTGAATGTGACAGCACCTACACCTCAAAATGAAGTTACAAGCCTTCAAAAATGAAGTAGGAGTACTCAGGTGAGCTTGTGTGAATTACTCTTTTCCAGAGAAAGAAGTTATTTTT	VAVKMLNVTAPTPQNEVTSLQK*SRSTQVSLCELLFSRERSYF	1	1	13	4	2	3		9.62696	8.34962	109.556	39.1512	17.6389	27.0568		42.5108	27.9489		1.52102
TGTGGCAGTGAAAATGTTGAATGTGACAGCACCTACACCTTGTAACAAGCCTTCAAAAATGAAGTAGGAGTACTCAGGTGAGCTTGTGTGAATTACTCTTTTCCAGAGAAAGAAGTTATTTTTATTAGCTC	VAVKMLNVTAPTPCNKPSKMK*EYSGELV*ITLFQRKKLFLLA	1	12	2	4	12	17		9.62696	100.195	16.8547	39.1512	105.833	153.322		42.2257	99.4353		0.424655
TGTGGCAGTGAAAATGTTGAATGTGACAGCACCTACACCTCAGCCTCAGTTACAAGCCTTCAAAAATGAAGTAGGAGTACTCAGGTGAGCTTGTGTGAATTACTCTTTTCCAGAGAAAGAAGTTATTTTTA	VAVKMLNVTAPTPQPQLQAFKNEVGVLR*ACVNYSFPEKEVIF	1	12	2	0	1	14		9.62696	100.195	16.8547	0	8.81943	126.265		42.2257	45.0281		0.937763
TGTGGCAGTGAAAATGTTGAATGTGACAGCACCTACACCTCAGGTGTAGGTTACAAGCCTTCAAAAATGAAGTAGGAGTACTCAGGTGAGCTTGTGTGAATTACTCTTTTCCAGAGAAAGAAGTTATTTTT	VAVKMLNVTAPTPQV*VTSLQK*SRSTQVSLCELLFSRERSYF	1	13	1	7	18	13		9.62696	108.545	8.42737	68.5146	158.75	117.246		42.1998	114.837		0.367476
TGTGGCAGTGAAAATGTTGAATGTGAAATGAAGTAGGAGTACTCAGGTGAGCTTGTGTGAATTACTCTTTTCCAGAGAAAGAAGTTATTTTTATTAGCTCCTGGTTCCCAGTGGACAGTGCAGGGGAAAGA	VAVKMLNVK*SRSTQVSLCELLFSRERSYFY*LLVPSGQCRGK	1	14	0	8	0	7		9.62696	116.895	0	78.3024	0	63.1325		42.1739	47.145		0.894557
TGTGGCAGTGAAAATGTTGAATGTGACAGCACCTACTACACAAGCCTTCAAAAATGAAGTAGGAGTACTCAGGTGAGCTTGTGTGAATTACTCTTTTCCAGAGAAAGAAGTTATTTTTATTAGCTCCTGGT	VAVKMLNVTAPTTQAFKNEVGVLR*ACVNYSFPEKEVIFISSW	0	0	15	0	0	0		0	0	126.411	0	0	0		42.1368	0		-1
TGTGGCAGTGAAAATGTTGAATGTGACAGCACCTACACCTTGTTGAATGTTACAAGCCTTCAAAAATGAAGTAGGAGTACTCAGGTGAGCTTGTGTGAATTACTCTTTTCCAGAGAAAGAAGTTATTTTTA	VAVKMLNVTAPTPC*MLQAFKNEVGVLR*ACVNYSFPEKEVIF	0	0	15	0	0	0		0	0	126.411	0	0	0		42.1368	0		-1
TGTGGCAGTGAAAATGTTGAATGTGACAGCACCTACACCTCAGTTTTTTGAAGGTTTTTTGAAGTTACAAGCCTTCAAAAATGAAGTAGGAGTACTCAGGTGAGCTTGTGTGAATTACTCTTTTCCAGAGA	VAVKMLNVTAPTPQFFEGFLKLQAFKNEVGVLR*ACVNYSFPE	0	0	15	0	0	0		0	0	126.411	0	0	0		42.1368	0		-1
TGTGGCAGTGAAAATGTTGAATGTGACAGCACCTACACCTCAGGTTACAAGCCTTCAAAAGCCTTCATTTTTGAAGGTTACAAGCCTTCAAAAATGAAGTAGGAGTACTCAGGTGAGCTTGTGTGAATTAC	VAVKMLNVTAPTPQVTSLQKPSFLKVTSLQK*SRSTQVSLCEL	0	0	15	0	0	0		0	0	126.411	0	0	0		42.1368	0		-1
TGTGGCAGTGAAAATGTTGAATGTGACAGCACCTACACCTCAGCAACGAAGTAGGAGTACTCAGGTGAGCTTGTGTGAATTACTCTTTTCCAGAGAAAGAAGTTATTTTTATTAGCTCCTGGTTCCCAGTG	VAVKMLNVTAPTPQQRSRSTQVSLCELLFSRERSYFY*LLVPS	0	0	15	0	0	0		0	0	126.411	0	0	0		42.1368	0		-1
TGTGGCAGTGAAAATGTTGAATGTGACAGCACCTACACCTCAGTGTAGCCTTCAAAAATGAAGTAGGAGTACTCAGGTGAGCTTGTGTGAATTACTCTTTTCCAGAGAAAGAAGTTATTTTTATTAGCTCC	VAVKMLNVTAPTPQCSLQK*SRSTQVSLCELLFSRERSYFY*L	7	0	7	2	3	6		67.3887	0	58.9916	19.5756	26.4583	54.1135		42.1268	33.3825		1.26194
TGTGGCAGTGAAAATGTTGAATGTGACAGTACAAGCCTTCAAAAATGAAGTAGGAGTACTCAGGTGAGCTTGTGTGAATTACTCTTTTCCAGAGAAAGAAGTTATTTTTATTAGCTCCTGGTTCCCAGTGG	VAVKMLNVTVQAFKNEVGVLR*ACVNYSFPEKEVIFISSWFPV	0	2	13	1	5	2		0	16.6992	109.556	9.7878	44.0972	18.0378		42.085	23.9743		1.75542
TGTGGCAGTGAAAATGTTGAATGTGACAGCACCTACACCTTACTCTTTTCCAGAGAAAGAAGTTATTTTTATTAGCTCCTGGTTCCCAGTGGACAGTGCAGGGGAAAGAATAGTAGAAGATCGGAAGAGCA	VAVKMLNVTAPTPYSFPEKEVIFISSWFPVDSAGERIVEDRKS	0	3	12	0	6	5		0	25.0488	101.128	0	52.9166	45.0946		42.0591	32.6704		1.28738
TGTGGCAGTGAAAATGTTGAATGTGACAGCACCTACACCTCAGCCTTCAAAAAAGTTACAAGCCTTCAAAAATGAAGTAGGAGTACTCAGGTGAGCTTGTGTGAATTACTCTTTTCCAGAGAAAGAAGTTA	VAVKMLNVTAPTPQPSKKLQAFKNEVGVLR*ACVNYSFPEKEV	0	11	4	0	0	0		0	91.8458	33.7095	0	0	0		41.8517	0		-1
TGTGGCAGTGAAAATGTTGAATGTGACAGCACCTACACCCCCCAGTTACAAGCCTTCAAAAATGAAGTAGGAGTACTCAGGTGAGCTTGTGTGAATTACTCTTTTCCAGAGAAAGAAGTTATTTTTATTAG	VAVKMLNVTAPTPPSYKPSKMK*EYSGELV*ITLFQRKKLFLL	0	14	1	18	4	8		0	116.895	8.42737	176.18	35.2777	72.1514		41.774	94.5365		0.441882
TGTGGCAGTGAAAATGTTGAATGTGACAGCACCTACAAACTTCAAAAATGAAGTAGGAGTACTCAGGTGAGCTTGTGTGAATTACTCTTTTCCAGAGAAAGAAGTTATTTTTATTAGCTCCTGGTTCCCAG	VAVKMLNVTAPTNFKNEVGVLR*ACVNYSFPEKEVIFISSWFP	0	15	0	0	0	0		0	125.244	0	0	0	0		41.7481	0		-1
TGTGGCAGTGAAAATGTTGAATGTGACAGCACCTACACCTCAGTTACAAGCCTTACACCTTACACCTCAGTTACAAGCCTTCAAAAATGAAGTAGGAGTACTCAGGTGAGCTTGTGTGAATTACTCTTTTC	VAVKMLNVTAPTPQLQALHLTPQLQAFKNEVGVLR*ACVNYSF	0	15	0	0	0	0		0	125.244	0	0	0	0		41.7481	0		-1
TGTGGCAGTGAAAATGTTGAATGTGACAGCACCTACACCTCAGCCTTCAAAAATGAAGTAGGAGTACTCAGGTGAGCTTGTGTGAATTACTCGTTTCCAGAGAAAGAAGTTATTTTTATTAGCTCCTGGTT	VAVKMLNVTAPTPQPSKMK*EYSGELV*ITRFQRKKLFLLAPG	0	15	0	0	0	0		0	125.244	0	0	0	0		41.7481	0		-1
TGTGGCAGTGAAAATGTTGAATGTGACAGCACCTACACCTCAGCAAAATGCCTTCAAAAATGAAGTAGGAGTACTCAGGTGAGCTTGTGTGAATTACTCTTTTCCAGAGAAAGAAGTTATTTTTATTAGCT	VAVKMLNVTAPTPQQNAFKNEVGVLR*ACVNYSFPEKEVIFIS	0	15	0	0	0	0		0	125.244	0	0	0	0		41.7481	0		-1
TGTGGCAGTGAAAATGTTGAATGTGACAGCACCTACACCCACAGTTACAAGCCTTCAAAAATGAAGTAGGAGTACTCAGGTGAGCTTGTGTGAATTACTCTTTTCCAGAGAAAGAAGTTATTTTTATTAGC	VAVKMLNVTAPTPTVTSLQK*SRSTQVSLCELLFSRERSYFY*	13	0	0	4	5	14		125.15	0	0	39.1512	44.0972	126.265		41.7168	69.8378		0.597339
TGTGGCAGTGAAAATGAAGCCTTCAAAAATGAAGTAGGAGTACTCAGGTGAGCTTGTGTGAATTACTCTTTTCCAGAGAAAGAAGTTATTTTTATTAGCTCCTGGTTCCCAGTGGACAGTGCAGGGGAAAG	VAVKMKPSKMK*EYSGELV*ITLFQRKKLFLLAPGSQWTVQGK	13	0	0	5	0	8		125.15	0	0	48.939	0	72.1514		41.7168	40.3635		1.03353
TGTGGCAGTGAAAATGTTGAATGTGACAGCACCTACACCTCTTGTAACTGTTACAAGCCTTCAAAAATGAAGTAGGAGTACTCAGGTGAGCTTGTGTGAATTACTCTTTTCCAGAGAAAGAAGTTATTTTT	VAVKMLNVTAPTPLVTVTSLQK*SRSTQVSLCELLFSRERSYF	13	0	0	0	1	5		125.15	0	0	0	8.81943	45.0946		41.7168	17.9713		2.3213
TGTGGCAGTGAAAATGTTGAATGTGACAGCACCTACACCTCAGCAGTACTGAGTAGGAGTACTCAGGTGAGCTTGTGTGAATTACTCTTTTCCAGAGAAAGAAGTTATTTTTATTAGCTCCTGGTTCCCAG	VAVKMLNVTAPTPQQY*VGVLR*ACVNYSFPEKEVIFISSWFP	13	0	0	1	0	0		125.15	0	0	9.7878	0	0		41.7168	3.2626		12.7864
TGTGGCAGTGAAAATGTTGAATGTGACAGCACCTACACCTCAGCAAGTACTCAGGTGAGCTTGTGTGAATTACTCTTTTCCAGAGAAAGAAGTTATTTTTATTAGCTCCTGGTTCCCAGTGGACAGTGCAG	VAVKMLNVTAPTPQQVLR*ACVNYSFPEKEVIFISSWFPVDSA	13	0	0	0	0	0		125.15	0	0	0	0	0		41.7168	0		-1
TGTGGCAGTGAAAATGTTGAATGTGACAGCACCTACACCTTACAAGCCTTACAAGCACCTACAGTTACAAGCCTTCAAAAATGAAGTAGGAGTACTCAGGTGAGCTTGTGTGAATTACTCTTTTCCAGAGA	VAVKMLNVTAPTPYKPYKHLQLQAFKNEVGVLR*ACVNYSFPE	13	0	0	0	0	0		125.15	0	0	0	0	0		41.7168	0		-1
TGTGGCAGTGAAAATGTTGAATGTGACAGCACCTACACCTCAAAATTACTCTTTTCCAGAGAAAGAAGTTATTTTTATTAGCTCCTGGTTCCCAGTGGACAGTGCAGGGGAAAGAATAGTAGAAGATCGGA	VAVKMLNVTAPTPQNYSFPEKEVIFISSWFPVDSAGERIVEDR	12	0	1	2	5	1		115.523	0	8.42737	19.5756	44.0972	9.01892		41.3169	24.2306		1.70516
TGTGGCAGTGAAAATGTTGAATGTGACAGCACCTACACCTGCAGTTACAAGCCTTCAAAAATGAAGTAGGAGTACTCAGGTGAGCTTGTGTGAATTACTCTTTTCCAGAGAAAGAAGTTATTTTTATTAGC	VAVKMLNVTAPTPAVTSLQK*SRSTQVSLCELLFSRERSYFY*	5	1	8	6	7	22		48.1348	8.34962	67.4189	58.7268	61.736	198.416		41.3011	106.293		0.388559
TGTGGCAGTGAAAATGTTGAATGTGACAGCACCTACACCTCAGCCTTCAAAAATGAAGTAGGAGTACTCAGGTGAGCTTGTGTGAATTACTCTTTTCCAGAGAAAGAAGTTATTTTTATTAGCTCCTGGTC	VAVKMLNVTAPTPQPSKMK*EYSGELV*ITLFQRKKLFLLAPG	5	6	3	7	4	11		48.1348	50.0977	25.2821	68.5146	35.2777	99.2081		41.1715	67.6668		0.608445
TGTGGCAGTGAAAATGTTGAATGTGACAGCACCTACACCTCATTTTACAAGCCTTCAAAAATGAAGTAGGAGTACTCAGGTGAGCTTGTGTGAATTACTCTTTTCCAGAGAAAGAAGTTATTTTTATTAGC	VAVKMLNVTAPTPHFTSLQK*SRSTQVSLCELLFSRERSYFY*	4	1	9	3	7	8		38.5078	8.34962	75.8463	29.3634	61.736	72.1514		40.9013	54.4169		0.751627
TGTGGCAGTGAAAATGTTGAATGTGAGAGCACCTACACCTCAGTTACAAGCCTTCAAAAATGAAGTAGGAGTACTCAGGTGAGCTTGTGTGAATTACTCTTTTCCAGAGAAAGAAGTTATTTTTATTAGCT	VAVKMLNVRAPTPQLQAFKNEVGVLR*ACVNYSFPEKEVIFIS	4	2	8	0	0	1		38.5078	16.6992	67.4189	0	0	9.01892		40.8753	3.00631		13.5965
TGTGGCAGTGAAAATGTTGAATGTGACAGCACCTACACCTCAGTTACAAGCCTTCAAAAATGAAGTAGGAGTACTCAGGTGAGCTTGTGTGAATTACTCTTTTCCAGAGAAAGAAGTTATTTTTTTTAGCT	VAVKMLNVTAPTPQLQAFKNEVGVLR*ACVNYSFPEKEVIFFS	4	4	6	3	0	3		38.5078	33.3985	50.5642	29.3634	0	27.0568		40.8235	18.8067		2.17069
TGTGGCAGTGAAAATGTTGAATGTGACAGCACCTACACCTCAAAAAGCCTTCAAAAATGAAGTAGGAGTACTCAGGTGAGCTTGTGTGAATTACTCTTTTCCAGAGAAAGAAGTTATTTTTATTAGCTCCT	VAVKMLNVTAPTPQKAFKNEVGVLR*ACVNYSFPEKEVIFISS	3	1	10	3	1	3		28.8809	8.34962	84.2737	29.3634	8.81943	27.0568		40.5014	21.7465		1.86243
TGTGGCAGTGAAAATGTTGAATGTGACAGCACCTACACCTCAAAATTACAAGCCTTCAAAAATGAAGTAGGAGTACTCAGGTGAGCTTGTGTGAATTACTCTTTTCCAGAGAAAGAAGTTATTTTTATTAG	VAVKMLNVTAPTPQNYKPSKMK*EYSGELV*ITLFQRKKLFLL	3	4	7	16	16	29		28.8809	33.3985	58.9916	156.605	141.111	261.549		40.4236	186.421		0.21684
TGTGGCAGTGAAAATGTTGAATGTGACAGCACCTACACCTTACAAGTTACAAGCCTTCAAAAATGAAGTAGGAGTACTCAGGTGAGCTTGTGTGAATTACTCTTTTCCAGAGAAAGAAGTTATTTTTATTA	VAVKMLNVTAPTPYKLQAFKNEVGVLR*ACVNYSFPEKEVIFI	3	10	1	8	0	3		28.8809	83.4962	8.42737	78.3024	0	27.0568		40.2681	35.1197		1.1466
TGTGGCAGTGAAAATGTTGAATGTGACAGCACCTACACCTCAGTTAAAGCCTTCAAAAATGAAGTAGGAGTACTCAGGTGAGCTTGTGTGAATTACTCTTTTCCAGAGAAAGAAGTTATTTTTATTAGCTC	VAVKMLNVTAPTPQLKPSKMK*EYSGELV*ITLFQRKKLFLLA	2	5	7	1	0	2		19.2539	41.7481	58.9916	9.7878	0	18.0378		39.9979	9.27521		4.31234
TGTGGCAGTGAAAATGTTGAATGTGACAGCACCTACACCTCAGCCTTCAAAATGAAGCCTTCAAAAATGAAGTAGGAGTACTCAGGTGAGCTTGTGTGAATTACTCTTTTCCAGAGAAAGAAGTTATTTTT	VAVKMLNVTAPTPQPSK*SLQK*SRSTQVSLCELLFSRERSYF	1	1	12	7	28	18		9.62696	8.34962	101.128	68.5146	246.944	162.341		39.7017	159.266		0.249278
TGTGGCAGTGAAAATGTTGAATGTGACAGCACCTACACCTCAGTTACAAGCCTTCAAAAATGAAGTAGGAGTACTCAGGTGAGCTTGTGTGAATTACTCTTTTCCAGAGAAAGAAGTTATTTATATTAGCT	VAVKMLNVTAPTPQLQAFKNEVGVLR*ACVNYSFPEKEVIYIS	1	4	9	3	0	8		9.62696	33.3985	75.8463	29.3634	0	72.1514		39.6239	33.8383		1.17098
TGTGGCAGTGAAAATGTTGCCTTCAAAAATGAAGTAGGAGTACTCAGGTGAGCTTGTGTGAATTACTCTTTTCCAGAGAAAGAAGTTATTTTTATTAGCTCCTGGTTCCCAGTGGACAGTGCAGGGGAAAG	VAVKMLPSKMK*EYSGELV*ITLFQRKKLFLLAPGSQWTVQGK	0	2	12	4	3	11		0	16.6992	101.128	39.1512	26.4583	99.2081		39.2759	54.9392		0.714897
TGTGGCAGTGAAAATGTTGAATGTGACAGCACCTACACCTTGTAATTTTGAAGTTACAAGCCTTCAAAAATGAAGTAGGAGTACTCAGGTGAGCTTGTGTGAATTACTCTTTTCCAGAGAAAGAAGTTATT	VAVKMLNVTAPTPCNFEVTSLQK*SRSTQVSLCELLFSRERSY	0	4	10	0	0	2		0	33.3985	84.2737	0	0	18.0378		39.224	6.01261		6.52363
TGTGGCAGTGAAAATGTTGAATTACTCTTTTCCAGAGAAAGAAGTTATTTTTATTAGCTCCTGGTTCCCAGTGGACAGTGCAGGGGAAAGAATAGTAGAAGATCGGAAGAGCACACGTCTGAACTCCAGTC	VAVKMLNYSFPEKEVIFISSWFPVDSAGERIVEDRKSTRLNSS	0	6	8	6	4	10		0	50.0977	67.4189	58.7268	35.2777	90.1892		39.1722	61.3979		0.638006
TGTGGCAGTGAAAATGTTGAATGTGACAGCACCTACACCTTCAAAATGAAGCCTTCAAAAATGAAGTAGGAGTACTCAGGTGAGCTTGTGTGAATTACTCTTTTCCAGAGAAAGAAGTTATTTTTATTAGC	VAVKMLNVTAPTPSK*SLQK*SRSTQVSLCELLFSRERSYFY*	0	12	2	2	0	14		0	100.195	16.8547	19.5756	0	126.265		39.0167	48.6135		0.80259
TGTGGCAGTGAAAATGTTGAATGTGACAGCACCTACACCTTGTAACTACAAGCCTTCAAAAATGAAGTAGGAGTACTCAGGTGAGCTTGTGTGAATTACTCTTTTCCAGAGAAAGAAGTTATTTTTATTAG	VAVKMLNVTAPTPCNYKPSKMK*EYSGELV*ITLFQRKKLFLL	0	12	2	1	4	2		0	100.195	16.8547	9.7878	35.2777	18.0378		39.0167	21.0345		1.85489
TGTGGCAGTGAAAATGTTGAATGTGACAGCACCTACACCTCAAATGTGACAGCACCTACAAGCCTTCAAAAATGAAGTAGGAGTACTCAGGTGAGCTTGTGTGAATTACTCTTTTCCAGAGAAAGAAGTTA	VAVKMLNVTAPTPQM*QHLQAFKNEVGVLR*ACVNYSFPEKEV	0	14	0	0	0	0		0	116.895	0	0	0	0		38.9649	0		-1
TGTGGCAGTGAAAATGTTGAATGTGACAGCCTTCAAAAAGTTACAAGCCTTCAAAAATGAAGTAGGAGTACTCAGGTGAGCTTGTGTGAATTACTCTTTTCCAGAGAAAGAAGTTATTTTTATTAGCTCCT	VAVKMLNVTAFKKLQAFKNEVGVLR*ACVNYSFPEKEVIFISS	0	14	0	0	0	0		0	116.895	0	0	0	0		38.9649	0		-1
TGTGGCAGTGAAAATGTTGAGCCTTCAAAAATTACAAGCCTTCAAAAATGAAGTAGGAGTACTCAGGTGAGCTTGTGTGAATTACTCTTTTCCAGAGAAAGAAGTTATTTTTATTAGCTCCTGGTTCCCAG	VAVKMLSLQKLQAFKNEVGVLR*ACVNYSFPEKEVIFISSWFP	0	14	0	0	0	0		0	116.895	0	0	0	0		38.9649	0		-1
TGTGGCAGTGAAAATGTTGAGAAAGAAGTTATTTTTATTAGCTCCTGGTTCCCAGTGGACAGTGCAGGGGAAAGAATAGTAGAAGATCGGAAGAGCACACGTCTGAACTCCAGTCACGGTCCATAATCTCG	VAVKMLRKKLFLLAPGSQWTVQGKE**KIGRAHV*TPVTVHNL	0	14	0	0	0	0		0	116.895	0	0	0	0		38.9649	0		-1
TGTGGCAGTGAAAATGTTGAATGTGACAGCACCTACTTTTGAAGTAGGAGTACTCAGGTGAGCTTGTGTGAATTACTCTTTTCCAGAGAAAGAAGTTATTTTTATTAGCTCCTGGTTCCCAGTGGACAGTG	VAVKMLNVTAPTFEVGVLR*ACVNYSFPEKEVIFISSWFPVDS	0	14	0	0	0	0		0	116.895	0	0	0	0		38.9649	0		-1
TGTGGCAGTGAAAATGTTGAATGTGACAGCACCTACACCTCAGTTACAAGCCTTCAAAAAGTTACAAGCCTTCAAAAATGAAGTAGGAGTACTCAGGTGAGCTTGTGTGAATTACTCTTTTCCAGAGAAAG	VAVKMLNVTAPTPQLQAFKKLQAFKNEVGVLR*ACVNYSFPEK	0	14	0	0	0	0		0	116.895	0	0	0	0		38.9649	0		-1
TGTGGCAGTGAAAATGTTGAATGTGACATCACCTACACCTCAGTTACAAGCCTTCAAAAATGAAGTAGGAGTACTCAGGTGAGCTTGTGTGAATTACTCTTTTCCAGAGAAAGAAGTTATTTTTATTAGCT	VAVKMLNVTSPTPQLQAFKNEVGVLR*ACVNYSFPEKEVIFIS	6	4	3	3	0	2		57.7617	33.3985	25.2821	29.3634	0	18.0378		38.8141	15.8004		2.45652
TGTGGCAGTGAAAATGTTGAATGTGACAGCACCTACACCTTCAAAATTACAGTTACAAGCCTTCAAAAATGAAGTAGGAGTACTCAGGTGAGCTTGTGTGAATTACTCTTTTCCAGAGAAAGAAGTTATTT	VAVKMLNVTAPTPSKLQLQAFKNEVGVLR*ACVNYSFPEKEVI	6	6	1	1	0	0		57.7617	50.0977	8.42737	9.7878	0	0		38.7623	3.2626		11.8808
TGTGGCAGTGAAAATGTTGAATGTGACAGCACCTACACCTCAGTCCAGAGAAAGAAGTTATTTTTATTAGCTCCTGGTTCCCAGTGGACAGTGCAGGGGAAAGAATAGTAGAAGATCGGAAGAGCACACGT	VAVKMLNVTAPTPQSRERSYFY*LLVPSGQCRGKNSRRSEEHT	12	0	0	0	0	0		115.523	0	0	0	0	0		38.5078	0		-1
TGTGGCAGTGAAAATGTTGAATGTGACAGCACCTACACCTCACACCTTACAAGCCTTCAAAAATGAAGTAGGAGTACTCAGGTGAGCTTGTGTGAATTACTCTTTTCCAGAGAAAGAAGTTATTTTTATTA	VAVKMLNVTAPTPHTLQAFKNEVGVLR*ACVNYSFPEKEVIFI	12	0	0	0	0	0		115.523	0	0	0	0	0		38.5078	0		-1
TGTGGCAGTGAAAATGTTGAATGTGACAGCACCTACACCTCAGCCTTCAAAATGCTTCAAAAAATTACAAGCCTTCAAAAATGAAGTAGGAGTACTCAGGTGAGCTTGTGTGAATTACTCTTTTCCAGAGA	VAVKMLNVTAPTPQPSKCFKKLQAFKNEVGVLR*ACVNYSFPE	12	0	0	0	0	0		115.523	0	0	0	0	0		38.5078	0		-1
TGTGGCAGTGAAAATGTTGAATGTGACAGCACCTACACCACAGTTACAAGCCTTCAAAAATGAAGTAGCAGTACTCAGGTGAGCTTGTGTGAATTACTCTTTTCCAGAGAAAGAAGTTATTTTTATTAGCT	VAVKMLNVTAPTPQLQAFKNEVAVLR*ACVNYSFPEKEVIFIS	12	0	0	0	0	0		115.523	0	0	0	0	0		38.5078	0		-1
TGTGGCAGTGAAAATGTTGAATGTGACAGCACCTACACCTCAGCCTTACAAGCCTTCAAAAATGAAGTAGGAGTACTCAGGTGAGCTTGTGTGAATTACTCTTTTCCAGAGAAAGAAGTTATTTTTATTAG	VAVKMLNVTAPTPQPYKPSKMK*EYSGELV*ITLFQRKKLFLL	5	5	3	7	7	16		48.1348	41.7481	25.2821	68.5146	61.736	144.303		38.3883	91.5178		0.419463
TGTGGCAGTGAAAATGTTGAATGTGACAGCACCTACACCTCCAGTTACAAGCCTTCAAAAATGAAGTAGGAGTACTCAGGTGAGCTTGCGTGAATTACTCTTTTCCAGAGAAAGAAGTTATTTTTATTAGC	VAVKMLNVTAPTPPVTSLQK*SRSTQVSLRELLFSRERSYFY*	5	5	3	5	4	6		48.1348	41.7481	25.2821	48.939	35.2777	54.1135		38.3883	46.1101		0.832536
TGTGGGAGTGAAAATGTTGAATGTGACAGCACCTACACCTCAGTTACAAGCCTTCAAAAATGAAGTAGGAGTACTCAGGTGAGCTTGTGTGAATTACTCTTTTCCAGAGAAAGAAGTTATTTTTATTAGCT	VGVKMLNVTAPTPQLQAFKNEVGVLR*ACVNYSFPEKEVIFIS	5	5	3	1	0	3		48.1348	41.7481	25.2821	9.7878	0	27.0568		38.3883	12.2815		3.1257
TGTGGCAGTGAAAATGTTGAATGTGACAGCACCTACACCTCAGTTACAAGCCTTCAAAAATGAAGTAGGAGTACTCAGGTGAGCTTGTGTGAATTACTCTTTTCCAGAGAAAGAAGTATTTTTATTAGCTC	VAVKMLNVTAPTPQLQAFKNEVGVLR*ACVNYSFPEKEVFLLA	5	5	3	1	0	2		48.1348	41.7481	25.2821	9.7878	0	18.0378		38.3883	9.27521		4.13881
TGTGGCAGTGAAAATGTTGAATGTGACAGCACCTACAAGCCTTCAAAAATGAAGTAGGAGTACTCGGGTGAGCTTGTGTGAATTACTCTTTTCCAGAGAAAGAAGTTATTTTTATTAGCTCCTGGTTCCCA	VAVKMLNVTAPTSLQK*SRSTRVSLCELLFSRERSYFY*LLVP	4	4	5	4	7	10		38.5078	33.3985	42.1368	39.1512	61.736	90.1892		38.0144	63.6921		0.596846
TGTGGCAGTGAAAATGTTGAATGTGACAGCACCTACACAAGTTACAAGCCTTCAAAAATGAAGTAGGAGTACTCAGGTGAGCTTGTGTGAATTACTCTTTTCCAGAGAAAGAAGTTATTTTTATTAGCTCC	VAVKMLNVTAPTQVTSLQK*SRSTQVSLCELLFSRERSYFY*L	4	4	5	2	3	9		38.5078	33.3985	42.1368	19.5756	26.4583	81.1703		38.0144	42.4014		0.896536
TGTGGCAGTGAAAATGTTGAATGTGACAGCACCTACACCTCAGTTACAAGCCTTAAAAATGAAGTAGGAGTACTCAGGTGAGCTTGTGTGAATTACTCTTTTCCAGAGAAAGAAGTTATTTTTATTAGCTC	VAVKMLNVTAPTPQLQALKMK*EYSGELV*ITLFQRKKLFLLA	4	4	5	4	2	2		38.5078	33.3985	42.1368	39.1512	17.6389	18.0378		38.0144	24.9426		1.52407
TGTGGCAGTGAAAATGTTGAATGTGACAGCACCTACACCTCAGCACAGTTACAAGCCTTCAAAGATGAAGTAGGAGTACTCAGGTGAGCTTGTGTGAATTACTCTTTTCCAGAGAAAGAAGTTATTTTTAT	VAVKMLNVTAPTPQHSYKPSKMK*EYSGELV*ITLFQRKKLFL	4	5	4	1	3	6		38.5078	41.7481	33.7095	9.7878	26.4583	54.1135		37.9885	30.1199		1.26124
TGTGGCAGTGAAAATGTTGAATGTGACAGCACCTACACCTCAGTTACAAGCCTTCAAAAATGAAGTAGGAGTACTCAGGTGAGCGTGTGTGAATTACTCTTTTCCAGAGAAAGAAGTTATTTTTATTAGCT	VAVKMLNVTAPTPQLQAFKNEVGVLR*ACVNYSFPEKEVIFIS	4	9	0	0	1	0		38.5078	75.1465	0	0	8.81943	0		37.8848	2.93981		12.8868
TGTGGCAGTGAAAATGTTGAATGTGACCGCACCTACACCTCAGTTACAAGCCTTCAAAAATGAAGTAGGAGTACTCAGGTGAGCTTGTGTGAATTACTCTTTTCCAGAGAAAGAAGTTATTTTTATTAGCT	VAVKMLNVTAPTPQLQAFKNEVGVLR*ACVNYSFPEKEVIFIS	3	3	7	2	0	5		28.8809	25.0488	58.9916	19.5756	0	45.0946		37.6404	21.5567		1.74611
AGTGGCAGTGAAAATGTTGAATGTGACAGCACCTACACCTCAGTTACAAGCCTTCAAAAATGAAGTAGGAGTACTCAGGTGAGCTTGTGTGAATTACTCTTTTCCAGAGAAAGAAGTTATTTTTATTAGCT	VAVKMLNVTAPTPQLQAFKNEVGVLR*ACVNYSFPEKEVIFIS	3	7	3	2	3	4		28.8809	58.4473	25.2821	19.5756	26.4583	36.0757		37.5368	27.3699		1.37146
TGTGGCAGTGAAAATGTTGAATGTGACAGCACCTACACCTTCAAAATGTTACAAGCCTTCAAAAATGAAGTAGGAGTACTCAGGTGAGCTTGTGTGAATTACTCTTTTCCAGAGAAAGAAGTTATTTTTAT	VAVKMLNVTAPTPSKCYKPSKMK*EYSGELV*ITLFQRKKLFL	3	9	1	10	9	12		28.8809	75.1465	8.42737	97.878	79.3749	108.227		37.4849	95.16		0.393915
TGTGGCAGTGAAAATGTTGAATGTGACAGCACCTACACCTCAGGTAGGAGTACTCAGGTGAGCTTGTGTGAATTACTCTTTTCCAGAGAAAGAAGTTATTTTTATTAGCTCCTGGTTCCCAGTGGACAGTG	VAVKMLNVTAPTPQVGVLR*ACVNYSFPEKEVIFISSWFPVDS	2	1	10	6	13	7		19.2539	8.34962	84.2737	58.7268	114.653	63.1325		37.2924	78.8373		0.47303
TGTGGCAGTGAAAATGTTGAATGTGACAGCACCTACACCAAATGAAGTAGGAGTACTCAGGTGAGCTTGTGTGAATTACTCTTTTCCAGAGAAAGAAGTTATTTTTATTAGCTCCTGGTTCCCAGTGGACA	VAVKMLNVTAPTPNEVGVLR*ACVNYSFPEKEVIFISSWFPVD	9	1	2	2	8	18		86.6426	8.34962	16.8547	19.5756	70.5554	162.341		37.2823	84.1572		0.443008
TGTGGCAGTGAAAATGTTGAATGTGACAGCACCTACACCTCAAAAATTACAAGCCTTCAAAAATGAAGTAGGAGTACTCAGGTGAGCTTGTGTGAATTACTCTTTTCCAGAGAAAGAAGTTATTTTTATTA	VAVKMLNVTAPTPQKLQAFKNEVGVLR*ACVNYSFPEKEVIFI	2	2	9	3	5	10		19.2539	16.6992	75.8463	29.3634	44.0972	90.1892		37.2665	54.5499		0.683163
TGTGGCAGTGAAAATGTTGATTGTGACAGCACCTACACCTCAGTTACAAGCCTTCAAAAATGAAGTAGGAGTACTCAGGTGAGCTTGTGTGAATTACTCTTTTCCAGAGAAAGAAGTTATTTTTATTAGCT	VAVKMLIVTAPTPQLQAFKNEVGVLR*ACVNYSFPEKEVIFIS	2	3	8	2	0	2		19.2539	25.0488	67.4189	19.5756	0	18.0378		37.2406	12.5378		2.97026
TGTGGCAGTGAAAATGTTGAATGTGACAGCACCTACACCTTCAAAAATGAAGTAGGAGTACTCAAGTGAGCTTGTGTGAATTACTCTTTTCCAGAGAAAGAAGTTATTTTTATTAGCTCCTGGTTCCCAGT	VAVKMLNVTAPTPSKMK*EYSSELV*ITLFQRKKLFLLAPGSQ	2	6	5	3	3	7		19.2539	50.0977	42.1368	29.3634	26.4583	63.1325		37.1628	39.6514		0.937239
TGTGGCAGTGAAAATGTTGAATGTGACAGCACCTACACCTCCAGTTACAAGCCTTCAAAAATGAAGTAGGGGTACTCAGGTGAGCTTGTGTGAATTACTCTTTTCCAGAGAAAGAAGTTATTTTTATTAGC	VAVKMLNVTAPTPPVTSLQK*SRGTQVSLCELLFSRERSYFY*	2	6	5	1	1	5		19.2539	50.0977	42.1368	9.7878	8.81943	45.0946		37.1628	21.2339		1.75016
TGTGGCAGTGAAAATGTTGAATGTGACAGCACCTACACCTCAGCTGTTACAAGCCTTCAAAAATGAAGTAGGAGTACTCAGGTGAGCTTGTGTGAATTACTCTTTTCCAGAGAAAGAAGTTATTTTTATTA	VAVKMLNVTAPTPQLLQAFKNEVGVLR*ACVNYSFPEKEVIFI	1	0	12	9	9	28		9.62696	0	101.128	88.0902	79.3749	252.53		36.9185	139.998		0.263706
TGTGGCAGTGAAAATGTTGAATGTGACAGCACCTACACCTCAGTAGGTGTACTCAGGTGAGCTTGTGTGAATTACTCTTTTCCAGAGAAAGAAGTTATTTTTATTAGCTCCTGGTTCCCAGTGGACAGTGC	VAVKMLNVTAPTPQ*VYSGELV*ITLFQRKKLFLLAPGSQWTV	8	2	2	4	4	13		77.0156	16.6992	16.8547	39.1512	35.2777	117.246		36.8565	63.8916		0.57686
TGTGGCAGTGAAAATGTTGAATGTGACAGCTACAAGCCTTCAAAAATGAAGTAGGAGTACTCAGGTGAGCTTGTGTGAATTACTCTTTTCCAGAGAAAGAAGTTATTTTTATTAGCTCCTGGTTCCCAGTG	VAVKMLNVTATSLQK*SRSTQVSLCELLFSRERSYFY*LLVPS	1	10	2	8	3	8		9.62696	83.4962	16.8547	78.3024	26.4583	72.1514		36.6593	58.9707		0.621653
TGTGGCAGTGAAAATGTTGAATGTGACAGCACCTACACCTAGTTACAAGCCTTCAAAAATGAAGTAGGAGTACTCAGGTGAGCTTGTGTGAATTACTCTTTTCCAGAGAAAGAAGTTATTTTTATTAGCTC	VAVKMLNVTAPTPSYKPSKMK*EYSGELV*ITLFQRKKLFLLA	1	12	0	6	6	17		9.62696	100.195	0	58.7268	52.9166	153.322		36.6074	88.3217		0.414479
TGTGGCAGTGAAAATGTTGAATGTGACAGCACCTACATACAAGCCTTCAAAAATGAAGTAGGAGTACTCAGGTGAGCTTGTGTGAATTACTCTTTTCCAGAGAAAGAAGTTATTTTTATTAGCTCCTGGTT	VAVKMLNVTAPTYKPSKMK*EYSGELV*ITLFQRKKLFLLAPG	0	0	13	3	0	14		0	0	109.556	29.3634	0	126.265		36.5186	51.8761		0.703958
TGTGGCAGTGAAAATGTTGAATGTGACAGCACCTACACCTCAGCATTCTTCAAAAATGAAGTAGGAGTACTCAGGTGAGCTTGTGTGAATTACTCTTTTCCAGAGAAAGAAGTTATTTTTATTAGCTCCTG	VAVKMLNVTAPTPQHSSKMK*EYSGELV*ITLFQRKKLFLLAP	0	0	13	0	0	4		0	0	109.556	0	0	36.0757		36.5186	12.0252		3.03683
TGTGGCAGTGAAAATGTTGAATGTGACAGCACCTACACCTCAGTTACAATACTTCAAAAATGAAGTAGGAGTACTCAGGTGAGCTTGTGTGAATTACTCTTTTCCAGAGAAAGAAGTTATTTTTATTAGCT	VAVKMLNVTAPTPQLQYFKNEVGVLR*ACVNYSFPEKEVIFIS	0	0	13	0	0	2		0	0	109.556	0	0	18.0378		36.5186	6.01261		6.07366
TGTGGCAGTGAAAATGTTGAATGTGACAGCACCTACACCTCAGGTGTTTACAAGCCTTCAAAAATGAAGTAGGAGTACTCAGGTGAGCTTGTGTGAATTACTCTTTTCCAGAGAAAGAAGTTATTTTTATT	VAVKMLNVTAPTPQVFTSLQK*SRSTQVSLCELLFSRERSYFY	0	0	13	0	0	1		0	0	109.556	0	0	9.01892		36.5186	3.00631		12.1473
TGTGGCAGTGAAAATGTTGAATGTGACAGCACCTACACCTCATATCTTGTTACAAGCCTTCAAAAATGAAGTAGGAGTACTCAGGTGAGCTTGTGTGAATTACTCTTTTCCAGAGAAAGAAGTTATTTTTA	VAVKMLNVTAPTPHILLQAFKNEVGVLR*ACVNYSFPEKEVIF	0	0	13	0	0	0		0	0	109.556	0	0	0		36.5186	0		-1
TGTGGCAGTGAAAATGTTGAATGTGACAGCACCTACACCTCAGGTGAGGTGTAATTGTGTGAATTACTCTTTTCCAGAGAAAGAAGTTATTTTTATTAGCTCCTGGTTCCCAGTGGACAGTGCAGGGGAAA	VAVKMLNVTAPTPQVRCNCVNYSFPEKEVIFISSWFPVDSAGE	0	0	13	0	0	0		0	0	109.556	0	0	0		36.5186	0		-1
TGTGGCAGTGAAAATGTTGAATGTGACAGCACCTACACCTCAAAAATTACAGTTACAAGCCTTCAAAAATGAAGTAGGAGTACTCAGGTGAGCTTGTGTGAATTACTCTTTTCCAGAGAAAGAAGTTATTT	VAVKMLNVTAPTPQKLQLQAFKNEVGVLR*ACVNYSFPEKEVI	0	2	11	0	0	2		0	16.6992	92.7011	0	0	18.0378		36.4668	6.01261		6.06504
TGTGGCAGTGAAAATGTTGAATGTGACAGCACCTACACAGGTGAGCTTGTGTGAATTACTCTTTTCCAGAGAAAGAAGTTATTTTTATTAGCTCCTGGTTCCCAGTGGACAGTGCAGGGGAAAGAATAGTA	VAVKMLNVTAPTQVSLCELLFSRERSYFY*LLVPSGQCRGKNS	0	4	9	2	0	0		0	33.3985	75.8463	19.5756	0	0		36.4149	6.5252		5.58066
TGTGGCAGTGAAAATGTTGAATGTGACAGCACCTACACCTCAGCAGACAAGCCTTCAAAAATGAAGTAGGAGTACTCAGGTGAGCTTGTGTGAATTACTCTTTTCCAGAGAAAGAAGTTATTTTTATTAGC	VAVKMLNVTAPTPQQTSLQK*SRSTQVSLCELLFSRERSYFY*	7	5	0	0	5	8		67.3887	41.7481	0	0	44.0972	72.1514		36.3789	38.7495		0.938823
TGTGGCAGTGAAAATGTTGAATGTGACAGCACGGTTACAAGCCTTCAAAAATGAAGTAGGAGTACTCAGGTGAGCTTGTGTGAATTACTCTTTTCCAGAGAAAGAAGTTATTTTTATTAGCTCCTGGTTCC	VAVKMLNVTARLQAFKNEVGVLR*ACVNYSFPEKEVIFISSWF	0	8	5	1	0	1		0	66.7969	42.1368	9.7878	0	9.01892		36.3113	6.26891		5.79228
TGTGGCAGTGAAAATGTTGAATGTGACAGCACCTACACCTCAAAGTGTACAAGCCTTCAAAAATGAAGTAGGAGTACTCAGGTGAGCTTGTGTGAATTACTCTTTTCCAGAGAAAGAAGTTATTTTTATTA	VAVKMLNVTAPTPQSVQAFKNEVGVLR*ACVNYSFPEKEVIFI	0	10	3	0	0	0		0	83.4962	25.2821	0	0	0		36.2594	0		-1
TGTGGCAGTGAAAATGTTGAATGTGACAGCACCTACACCTCAAAAACAAGCCTTCAAAAATGAAGTAGGAGTACTCAGGTGAGCTTGTGTGAATTACTCTTTTCCAGAGAAAGAAGTTATTTTTATTAGCT	VAVKMLNVTAPTPQKQAFKNEVGVLR*ACVNYSFPEKEVIFIS	0	12	1	0	0	2		0	100.195	8.42737	0	0	18.0378		36.2076	6.01261		6.02194
TGTGGCAGTGAAAATGTTGAATGTGACAGCACCTACACCTACACCTTACAAGCCTTCAAAAATGAAGTAGGAGTACTCAGGTGAGCTTGTGTGAATTACTCTTTTCCAGAGAAAGAAGTTATTTTTATTAG	VAVKMLNVTAPTPTPYKPSKMK*EYSGELV*ITLFQRKKLFLL	0	13	0	1	3	0		0	108.545	0	9.7878	26.4583	0		36.1817	12.082		2.99467
TGTGGCAGTGAAAATGTTGAATGTGACAGCACTACAGTTACAAGCCTTCAAAAATGAAGTAGGAGTACTCAGGTGAGCTTGTGTGAATTACTCTTTTCCAGAGAAAGAAGTTATTTTTATTAGCTCCTGGT	VAVKMLNVTALQLQAFKNEVGVLR*ACVNYSFPEKEVIFISSW	0	13	0	2	0	0		0	108.545	0	19.5756	0	0		36.1817	6.5252		5.54491
TGTGGCAGTGAAAATGTTGAATGTGACAGCACCTACACCTCAGCAGTTCAAAAATGAAGTAGGAGTACTCAGGTGAGCTTGTGTGAATTACTCTTTTCCAGAGAAAGAAGTTATTTTTATTAGCTCCTGGT	VAVKMLNVTAPTPQQFKNEVGVLR*ACVNYSFPEKEVIFISSW	0	13	0	0	0	1		0	108.545	0	0	0	9.01892		36.1817	3.00631		12.0353
TGTGGCAGTGAAAATGTTGAATGTGACAGCACCTACACCTCAGTTACTGAGGTAACTGAAGTAGGAGTACTCAGGTGAGCTTGTGTGAATTACTCTTTTCCAGAGAAAGAAGTTATTTTTATTAGCTCCTG	VAVKMLNVTAPTPQLLR*LK*EYSGELV*ITLFQRKKLFLLAP	0	13	0	0	1	0		0	108.545	0	0	8.81943	0		36.1817	2.93981		12.3075
TGTGGCAGTGAAAATGTTGAATGTTGTAACTCAGTTACAAGCCTTCAAAAATGAAGTAGGAGTACTCAGGTGAGCTTGTGTGAATTACTCTTTTCCAGAGAAAGAAGTTATTTTTATTAGCTCCTGGTTCC	VAVKMLNVVTQLQAFKNEVGVLR*ACVNYSFPEKEVIFISSWF	0	13	0	0	0	0		0	108.545	0	0	0	0		36.1817	0		-1
TGTGGCAGTGAAAATGTTGAATGTGACAGCACCTACACCTCACATTCAACATTCTTTCCAGAGAAAGAAGTTATTTTTATTAGCTCCTGGTTCCCAGTGGACAGTGCAGGGGAAAGAATAGTAGAAGATCG	VAVKMLNVTAPTPHIQHSFQRKKLFLLAPGSQWTVQGKE**KI	0	13	0	0	0	0		0	108.545	0	0	0	0		36.1817	0		-1
TGTGGCAGTGAAAATGTTGAATGTGACAGCACCTACACCTCAAGCCTTCAGGTGAGCTTGTGTGAATTACTCTTTTCCAGAGAAAGAAGTTATTTTTATTAGCTCCTGGTTCCCAGTGGACAGTGCAGGGG	VAVKMLNVTAPTPQAFR*ACVNYSFPEKEVIFISSWFPVDSAG	0	13	0	0	0	0		0	108.545	0	0	0	0		36.1817	0		-1
TGTGGCAGTGAAAATGTTGAATGTGACAGCACCTACACCTCAGTTACAAGCCTTCAAAAATGAAGTAGGAGTACTCAGGTGAGCTTGTGTGAATTACTCTTTTCTTTTCCAGAGAAAGAAGTTATTTTTAT	VAVKMLNVTAPTPQLQAFKNEVGVLR*ACVNYSFLFQRKKLFL	5	1	6	2	1	0		48.1348	8.34962	50.5642	19.5756	8.81943	0		35.6829	9.46501		3.76998
TGTGGCAGTGAAAATGTTGAATGTGACAGCACCTACACCTCAGTTACAAGCCTTCAAAAAATGAAGTAGGAGTACTCAGGTGAGCTTGTGTGAATTACTCTTTTCCAGAGAAAGAAGTTATTTTTATTAGC	VAVKMLNVTAPTPQLQAFKK*SRSTQVSLCELLFSRERSYFY*	5	4	3	0	1	3		48.1348	33.3985	25.2821	0	8.81943	27.0568		35.6051	11.9587		2.97733
TGTGGCAGTGAAAATGTTGAATGTGACAGCACCTACACCTCAGCAGAGTTACAAGCCTTCAAAAATGAAGTAGGAGTACTCAGGTGAGCTTGTGTGAATTACTCTTTTCCAGAGAAAGAAGTTATTTTTAT	VAVKMLNVTAPTPQQSYKPSKMK*EYSGELV*ITLFQRKKLFL	5	6	1	4	7	5		48.1348	50.0977	8.42737	39.1512	61.736	45.0946		35.5533	48.6606		0.730638
TGTGGCAGTGAAAATGTTGAATGTGACAGCACCTACACAGCCTTCAAAAATGAAGTAGGAGTACTCAGGTGAGCTTGTGTGAATTACTCTTTTCCAGAGAAAGAAGTTATTTTTATTAGCTCCTGGTTCCC	VAVKMLNVTAPTQPSKMK*EYSGELV*ITLFQRKKLFLLAPGS	11	0	0	3	2	10		105.897	0	0	29.3634	17.6389	90.1892		35.2988	45.7305		0.771888
TGTGGCAGTGAAAATGTTGAATGTGACAGCACCTACACCTCAGGTTGAAGGCTTACAAGCCTTCAAAAATGAAGTAGGAGTACTCAGGTGAGCTTGTGTGAATTACTCTTTTCCAGAGAAAGAAGTTATTT	VAVKMLNVTAPTPQVEGLQAFKNEVGVLR*ACVNYSFPEKEVI	11	0	0	1	0	0		105.897	0	0	9.7878	0	0		35.2988	3.2626		10.8192
TGTGGCAGTGAAAATGTTGAATGTGACAGCACCTACACCTCAGTTACAAGCCTTCAAAAATGAAGTAGGAGTACTCAGGTGAGCTTGTGTGAGCTTGTGTGAATTACTCTTTTCCAGAGAAAGAAGTTATT	VAVKMLNVTAPTPQLQAFKNEVGVLR*ACVSLCELLFSRERSY	11	0	0	0	0	0		105.897	0	0	0	0	0		35.2988	0		-1
TGTGGCAGTGAAAATGTTGAATGTGACAGCACCTACACCTCAAGCCTTCAAAAATGAAGCCTTACAAGCCTTCAAAAATGAAGTAGGAGTACTCAGGTGAGCTTGTGTGAATTACTCTTTTCCAGAGAAAG	VAVKMLNVTAPTPQAFKNEALQAFKNEVGVLR*ACVNYSFPEK	11	0	0	0	0	0		105.897	0	0	0	0	0		35.2988	0		-1
TGTGGCAGTGAAAATGTTGCAAGCAGTTACAAGCCTTCAAAAATGAAGTAGGAGTACTCAGGTGAGCTTGTGTGAATTACTCTTTTCCAGAGAAAGAAGTTATTTTTATTAGCTCCTGGTTCCCAGTGGAC	VAVKMLQAVTSLQK*SRSTQVSLCELLFSRERSYFY*LLVPSG	11	0	0	0	0	0		105.897	0	0	0	0	0		35.2988	0		-1
TGTGGCAGTGAAAATGTTGAAGGCTTGTTACAAGCCTTCAAAAATGAAGTAGGAGTACTCAGGTGAGCTTGTGTGAATTACTCTTTTCCAGAGAAAGAAGTTATTTTTATTAGCTCCTGGTTCCCAGTGGA	VAVKMLKACYKPSKMK*EYSGELV*ITLFQRKKLFLLAPGSQW	11	0	0	0	0	0		105.897	0	0	0	0	0		35.2988	0		-1
TGTGGCAGTGAAAATGTTGAATGTGACAGCTTCAAAAATGAAGTAGGAGTACTCAGGTGAGCTTGTGTGAATTACTCTTTTCCAGAGAAAGAAGTTATTTTTATTAGCTCCTGGTTCCCAGTGGACAGTGC	VAVKMLNVTASKMK*EYSGELV*ITLFQRKKLFLLAPGSQWTV	4	1	7	4	8	20		38.5078	8.34962	58.9916	39.1512	70.5554	180.378		35.283	96.695		0.36489
TGTGGCAGTGAAAATGTTGAATGTGACAGCACCTACACCTCACAGTTACAAGCCTTCAGAAATGAAGTAGGAGTACTCAGGTGAGCTTGTGTGAATTACTCTTTTCCAGAGAAAGAAGTTATTTTTATTAG	VAVKMLNVTAPTPHSYKPSEMK*EYSGELV*ITLFQRKKLFLL	4	5	3	4	6	8		38.5078	41.7481	25.2821	39.1512	52.9166	72.1514		35.1793	54.7397		0.642666
TGTGGCAGTGAAAATGTTGAATGTGACAGCACCTACACCTCAGTAAGCCTTCAAAAATGAAGTAGGAGTACTCAGGTGAGCTTGTGTGAATTACTCTTTTCCAGAGAAAGAAGTTATTTTTATTAGCTCCT	VAVKMLNVTAPTPQ*AFKNEVGVLR*ACVNYSFPEKEVIFISS	3	0	9	8	5	7		28.8809	0	75.8463	78.3024	44.0972	63.1325		34.9091	61.844		0.56447
TGTGGCAGTGAAAATGTTGAAGTACAAGCCTTCAAAAATGAAGTAGGAGTACTCAGGTGAGCTTGTGTGAATTACTCTTTTCCAGAGAAAGAAGTTATTTTTATTAGCTCCTGGTTCCCAGTGGACAGTGC	VAVKMLKYKPSKMK*EYSGELV*ITLFQRKKLFLLAPGSQWTV	10	0	1	0	0	1		96.2696	0	8.42737	0	0	9.01892		34.899	3.00631		11.6086
TGTGGCAGTGAAAATGTTGAATGTGACAGCACCTACACCTCAGTTACAAGCCTTCAAATATGAAGTAGGAGTACTCAGGTGAGCTTGTGTGAATTACTCTTTTCCAGAGAAAGAAGTTATTTTTATTAGCT	VAVKMLNVTAPTPQLQAFKYEVGVLR*ACVNYSFPEKEVIFIS	3	2	7	2	1	2		28.8809	16.6992	58.9916	19.5756	8.81943	18.0378		34.8572	15.4776		2.2521
TGTGGCAGTGAAAATGTTGAATGTGACAGCACCTACACCTCAGTTACAAGCCTTCAAAAATGAAGTAGGATTACTCAGGTGAGCTTGTGTGAATTACTCTTTTCCAGAGAAAGAAGTTATTTTTATTAGCT	VAVKMLNVTAPTPQLQAFKNEVGLLR*ACVNYSFPEKEVIFIS	3	3	6	0	2	7		28.8809	25.0488	50.5642	0	17.6389	63.1325		34.8313	26.9238		1.2937
TGTGGCAGTGAAAATGTTGAATGTGACAGCACCTACACCTCAGTTACAAGCCTTCAAAAATGAAGTAGGAGTACTCAGGTGAGCTTGTGTGAATTACTCTTTTCCAGAGAAAGAAGTTATTTTTATTCGCT	VAVKMLNVTAPTPQLQAFKNEVGVLR*ACVNYSFPEKEVIFIR	3	3	6	0	1	1		28.8809	25.0488	50.5642	0	8.81943	9.01892		34.8313	5.94612		5.85782
TGTGGCAGTGAAAATGTTGAATGTGACAGCACCTACACCTCATTTTTGAAGTTACAAGCCTTCAAAAATGAAGTAGGAGTACTCAGGTGAGCTTGTGTGAATTACTCTTTTCCAGAGAAAGAAGTTATTTT	VAVKMLNVTAPTPHF*SYKPSKMK*EYSGELV*ITLFQRKKLF	9	1	1	5	8	8		86.6426	8.34962	8.42737	48.939	70.5554	72.1514		34.4732	63.8819		0.539639
TGTGGCAGTGAAAAATGAAGTAGGAGTACTCAGGTGAGCTTGTGTGAATTACTCTTTTCCAGAGAAAGAAGTTATTTTTATTAGCTCCTGGTTCCCAGTGGACAGTGCAGGGGAAAGAATAGTAGAAGATC	VAVKNEVGVLR*ACVNYSFPEKEVIFISSWFPVDSAGERIVED	9	2	0	4	2	5		86.6426	16.6992	0	39.1512	17.6389	45.0946		34.4473	33.9616		1.0143
TGTGGCAGTGAAAATGTTGAATGTGACAGCACCTACAAGCCTTCAAAAATGAAGTAGGAGTACTCAGGTGAGCTTGTGTGAATTACTCTTTTCCAGAGAAAGAAGTTATTTTTATTAGCTCCTGGTCCCAG	VAVKMLNVTAPTSLQK*SRSTQVSLCELLFSRERSYFY*LLVP	2	3	7	6	7	9		19.2539	25.0488	58.9916	58.7268	61.736	81.1703		34.4314	67.211		0.512289
TGTGGCAGTGAAAATGTTGACTGTGACAGCACCTACACCTCAGTTACAAGCCTTCAAAAATGAAGTAGGAGTACTCAGGTGAGCTTGTGTGAATTACTCTTTTCCAGAGAAAGAAGTTATTTTTATTAGCT	VAVKMLTVTAPTPQLQAFKNEVGVLR*ACVNYSFPEKEVIFIS	2	5	5	0	0	0		19.2539	41.7481	42.1368	0	0	0		34.3796	0		-1
TGTGGCAGTGAAAATGTTGAATGTGACAGCACCTACACCTCAGTTACAAGCCTTCAAAAATGAAGTAGGAGTACTCAGGTGAGCTTGTGTCAATTACTCTTTTCCAGAGAAAGAAGTTATTTTTATTAGCT	VAVKMLNVTAPTPQLQAFKNEVGVLR*ACVNYSFPEKEVIFIS	2	7	3	1	1	0		19.2539	58.4473	25.2821	9.7878	8.81943	0		34.3278	6.20241		5.53459
TGTGGCAGTGAAAATGTTGAATGTGACAGCACCTACACCTCAGTTTCAGTTACAAGCCTTCAAAAATGAAGTAGGAGTACTCAGGTGAGCTTGTGTGAATTACTCTTTTCCAGAGAAAGAAGTTATTTTTA	VAVKMLNVTAPTPQFQLQAFKNEVGVLR*ACVNYSFPEKEVIF	1	0	11	3	1	1		9.62696	0	92.7011	29.3634	8.81943	9.01892		34.1093	15.7339		2.16789
TGTGGCAGTGAAAATGTTGAATGTGACAGCACCTACACTCTTTTCCAGAGAAAGAAGTTATTTTTATTAGCTCCTGGTTCCCAGTGGACAGTGCAGGGGAAAGAATAGTAGAAGATCGGAAGAGCACACGT	VAVKMLNVTAPTLFSRERSYFY*LLVPSGQCRGKNSRRSEEHT	1	2	9	3	12	27		9.62696	16.6992	75.8463	29.3634	105.833	243.511		34.0575	126.236		0.269793
TGTGGCAGTGAAAATGTTGAATGTGACAGCACCTACAAGCCTTCAAAAATGAAGTAGGAATACTCAGGTGAGCTTGTGTGAATTACTCTTTTCCAGAGAAAGAAGTTATTTTTATTAGCTCCTGGTTCCCA	VAVKMLNVTAPTSLQK*SRNTQVSLCELLFSRERSYFY*LLVP	1	4	7	6	8	16		9.62696	33.3985	58.9916	58.7268	70.5554	144.303		34.0057	91.195		0.37289
TGTGGCAGTGAAAATGTTGAATGTGACAGCACCTACACCTCAGTTACAGCCTTCAAAAATGAAGTAGGAGTACTCAGGTGAGCTTGTGTGAATTACTCTTTTCCAGAGAAAGAAGTTATTTTTATTAGCTC	VAVKMLNVTAPTPQLQPSKMK*EYSGELV*ITLFQRKKLFLLA	1	4	7	6	1	10		9.62696	33.3985	58.9916	58.7268	8.81943	90.1892		34.0057	52.5785		0.64676
TGTGGCAGTGAAAATGTTGAATGTGACAGCACCTACACCTCAGTTACAAGCCTTCAAAAATGAAGTAGGAGTACTCAGGTGAGCTTGTGTGAATTCTCTTTTCCAGAGAAAGAAGTTATTTTTATTAGCTC	VAVKMLNVTAPTPQLQAFKNEVGVLR*ACVNSLFQRKKLFLLA	1	5	6	1	1	2		9.62696	41.7481	50.5642	9.7878	8.81943	18.0378		33.9797	12.215		2.7818
TGTGGCAGTGAAAATGTTGAATGTGACAGCACCTACACCTCAGCAAATGAAGTAGGAGTACTCAGGTGAGCTTGTGTGAATTACTCTTTTCCAGAGAAAGAAGTTATTTTTATTAGCTCCTGGTTCCCAGT	VAVKMLNVTAPTPQQMK*EYSGELV*ITLFQRKKLFLLAPGSQ	1	6	5	5	7	11		9.62696	50.0977	42.1368	48.939	61.736	99.2081		33.9538	69.9611		0.485325
TGTGGCAGCCTTCAAAAATGAAGTAGGAGTACTCAGGTGAGCTTGTGTGAATTACTCTTTTCCAGAGAAAGAAGTTATTTTTATTAGCTCCTGGTTCCCAGTGGACAGTGCAGGGGAAAGAATAGTAGAAG	VAAFKNEVGVLR*ACVNYSFPEKEVIFISSWFPVDSAGERIVE	1	6	5	5	6	10		9.62696	50.0977	42.1368	48.939	52.9166	90.1892		33.9538	64.0149		0.530405
TGTGGCAGTGAAAATGTTGAATGTGACAGCACCTACACCTCAATGAAGTAGGAGTACTCAGGTGAGCTTGTGTGAATTACTCTTTTCCAGAGAAAGAAGTTATTTTTATTAGCTCCTGGTTCCCAGTGGAC	VAVKMLNVTAPTPQ*SRSTQVSLCELLFSRERSYFY*LLVPSG	1	10	1	6	9	10		9.62696	83.4962	8.42737	58.7268	79.3749	90.1892		33.8502	76.097		0.444829
TGTGGCAGTGAAAATGTTGAATGTGACAGCACCTACACCTCTGGAAAAGAGTTATTTTTATTAGCTCCTGGTTCCCAGTGGACAGTGCAGGGGAAAGAATAGTAGAAGATCGGAAGAGCACACGTCTGAAC	VAVKMLNVTAPTPLEKSYFY*LLVPSGQCRGKNSRRSEEHTSE	0	0	12	0	0	6		0	0	101.128	0	0	54.1135		33.7095	18.0378		1.86882
TGTGGCAGTGAAAATGTTGAATGTGACAGCACCTACACCTCAGTTACAAGGCTCAGTTACAAGCCTTCAAAAATGAAGTAGGAGTACTCAGGTGAGCTTGTGTGAATTACTCTTTTCCAGAGAAAGAAGTT	VAVKMLNVTAPTPQLQGSVTSLQK*SRSTQVSLCELLFSRERS	0	0	12	0	2	4		0	0	101.128	0	17.6389	36.0757		33.7095	17.9048		1.8827
TGTGGCAGTGAAAATGTTGAATGTGACAGCACCTACACCTCAGTAGTTACAAGCCTTCAAAATGAAGTAGGAGTACTCAGGTGAGCTTGTGTGAATTACTCTTTTCCAGAGAAAGAAGTTATTTTTATTAG	VAVKMLNVTAPTPQ*LQAFKMK*EYSGELV*ITLFQRKKLFLL	0	0	12	0	0	0		0	0	101.128	0	0	0		33.7095	0		-1
TGTGGCAGTGAAAATGTTGAATGTGACAGCACCTACACCTCAGCATAAGTTACAAGCCTTCAAAAATGAAGTAGGAGTACTCAGGTGAGCTTGTGTGAATTACTCTTTTCCAGAGAAAGAAGTTATTTTTA	VAVKMLNVTAPTPQHKLQAFKNEVGVLR*ACVNYSFPEKEVIF	0	0	12	0	0	0		0	0	101.128	0	0	0		33.7095	0		-1
TGTGGCAGTGAAAATGTTGAATGTGACAGCACCTACACATTCAACAGCTACAAGCCTTCAAAAATGAAGTAGGAGTACTCAGGTGAGCTTGTGTGAATTACTCTTTTCCAGAGAAAGAAGTTATTTTTATT	VAVKMLNVTAPTHSTATSLQK*SRSTQVSLCELLFSRERSYFY	0	0	12	0	0	0		0	0	101.128	0	0	0		33.7095	0		-1
TGTGGCAGTGAAAATGTTGAATGTGACAGCACCTACACCTCAAGTAGGAGTACTCAGGTGAGCTTGTGTGAATTACTCTTTTCCAGAGAAAGAAGTTATTTTTATTAGCTCCTGGTTCCCAGTGGACAGTG	VAVKMLNVTAPTPQVGVLR*ACVNYSFPEKEVIFISSWFPVDS	7	1	3	16	5	25		67.3887	8.34962	25.2821	156.605	44.0972	225.473		33.6735	142.058		0.23704
TGTGGCAGTGAAAATGTTGAATGTGACAGCACCTACACCTTACAATTACAAGTTACAAGCCTTCAAAAATGAAGTAGGAGTACTCAGGTGAGCTTGTGTGAATTACTCTTTTCCAGAGAAAGAAGTTATTT	VAVKMLNVTAPTPYNYKLQAFKNEVGVLR*ACVNYSFPEKEVI	0	2	10	0	0	0		0	16.6992	84.2737	0	0	0		33.6576	0		-1
TGTGGCAGTGAAAATGTTGAATGTGACAGCCAGTTACAAGCCTTCAAAAATGAAGTAGGAGTACTCAGGTGAGCTTGTGTGAATTACTCTTTTCCAGAGAAAGAAGTTATTTTTATTAGCTCCTGGTTCCC	VAVKMLNVTASYKPSKMK*EYSGELV*ITLFQRKKLFLLAPGS	0	3	9	9	8	32		0	25.0488	75.8463	88.0902	70.5554	288.605		33.6317	149.084		0.22559
TGTGGCAGTGAAAATGTTGAATGTGACAGCACCTACACCTCAGTTACAAGCCTTCAAAAATGAAGTAGGAGTACTCAGGTGAGCTTGTGTGAATTACTCTTTTCCAGAGAAGAAGTTATTTTTATTAGCTC	VAVKMLNVTAPTPQLQAFKNEVGVLR*ACVNYSFPEKKLFLLA	7	4	0	0	0	3		67.3887	33.3985	0	0	0	27.0568		33.5957	9.01892		3.72503
TGTGGCAGTGAAAATGTTGAATGTGACAGCACCTACACCTCAGTGTAGGTTACAAGCCTTCAAAAATGAAGTAGGAGTACTCAGGTGAGCTTGTGTGAATTACTCTTTTCCAGAGAAAGAAGTTATTTTTA	VAVKMLNVTAPTPQCRLQAFKNEVGVLR*ACVNYSFPEKEVIF	0	9	3	5	0	6		0	75.1465	25.2821	48.939	0	54.1135		33.4762	34.3508		0.974538
TGTGGCAGTGAAAATGTTGAATGTGACAGCACCTACACCTCAGCCTTCAAAAATGAAGTACTTACAAGCCTTCAAAAATGAAGTAGGAGTACTCAGGTGAGCTTGTGTGAATTACTCTTTTCCAGAGAAAG	VAVKMLNVTAPTPQPSKMKYLQAFKNEVGVLR*ACVNYSFPEK	0	12	0	1	0	0		0	100.195	0	9.7878	0	0		33.3985	3.2626		10.2368
TGTGGCAGTGAAAATGTTGAATGTGACAGCATTACTCTTTTCCAGAGAATTACTCTTTTCCAGAGAAAGAAGTTATTTTTATTAGCTCCTGGTTCCCAGTGGACAGTGCAGGGGAAAGAATAGTAGAAGAT	VAVKMLNVTALLFSRELLFSRERSYFY*LLVPSGQCRGKNSRR	0	12	0	0	1	0		0	100.195	0	0	8.81943	0		33.3985	2.93981		11.3608
TGTGGCAGTGAAAATGTTGAATGTGACAGCACCTACACCTCAGTTACCAAGCCTTCAAAAATGAAGTAGGAGTACTCAGGTGAGCTTGTGTGAATTACTCTTTTCCAGAGAAAGAAGTTATTTTTATTAGC	VAVKMLNVTAPTPQLPSLQK*SRSTQVSLCELLFSRERSYFY*	0	12	0	0	0	0		0	100.195	0	0	0	0		33.3985	0		-1
TGTGGCAGTGAAAATGTTGAATGTGACAGCACCTACACCTCAGCAGTCTACAAGCCTTCAAAAATGAAGTAGGAGTACTCAGGTGAGCTTGTGTGAATTACTCTTTTCCAGAGAAAGAAGTTATTTTTATT	VAVKMLNVTAPTPQQSTSLQK*SRSTQVSLCELLFSRERSYFY	0	12	0	0	0	0		0	100.195	0	0	0	0		33.3985	0		-1
TGTGGCAGTGAAAATGTTGAATGTGACAGCACCTACACCTCAAAAGTAGGTTACAAGCCTTCAAAAATGAAGTAGGAGTACTCAGGTGAGCTTGTGTGAATTACTCTTTTCCAGAGAAAGAAGTTATTTTT	VAVKMLNVTAPTPQK*VTSLQK*SRSTQVSLCELLFSRERSYF	0	12	0	0	0	0		0	100.195	0	0	0	0		33.3985	0		-1
TGTGGCAGTGAAAATGTTGAATGTGACAGCACCTACACCTCATTGTTGGCAGTTACAAGCCTTCAAAAATGAAGTAGGAGTACTCAGGTGAGCTTGTGTGAATTACTCTTTTCCAGAGAAAGAAGTTATTT	VAVKMLNVTAPTPHCWQLQAFKNEVGVLR*ACVNYSFPEKEVI	0	12	0	0	0	0		0	100.195	0	0	0	0		33.3985	0		-1
TGTGGCAGTGAAAATGTTGAATGTGACAGCACCTACACCTCAGTTACAAGCCTTCAAAAATGTGACAGCACCTACACCTCAGTTACAAGCCTTCAAAAATGAAGTAGGAGTACTCAGGTGAGCTTGTGTGA	VAVKMLNVTAPTPQLQAFKNVTAPTPQLQAFKNEVGVLR*ACV	0	12	0	0	0	0		0	100.195	0	0	0	0		33.3985	0		-1
TGTGGCAGTGAAAATGTTGAATGTGACAGCACCTACACCTCAGCAGGTGTAGCAGCAAGCCTTCAAAAATGAAGTAGGAGTACTCAGGTGAGCTTGTGTGAATTACTCTTTTCCAGAGAAAGAAGTTATTT	VAVKMLNVTAPTPQQV*QQAFKNEVGVLR*ACVNYSFPEKEVI	0	12	0	0	0	0		0	100.195	0	0	0	0		33.3985	0		-1
TGTGGCAGTGAAAATGTTGAATGTGACAGCACCTACACCTAGAGTTACAAGCCTTCAAAAATGAAGTAGGAGTACTCAGGTGAGCTTGTGTGAATTACTCTTTTCCAGAGAAAGAAGTTATTTTTATTAGC	VAVKMLNVTAPTPRVTSLQK*SRSTQVSLCELLFSRERSYFY*	0	12	0	0	0	0		0	100.195	0	0	0	0		33.3985	0		-1
TGTGGCAGTGAAAATGTTGAATGTGACAGCACCTACACCTTTGAAGTTACAAGCCTTCAAAAATGAAGTAGGAGTACTCAGGTGAGCTTGTGTGAATTACTCTTTTCCAGAGAAAGAAGTTATTTTTATTA	VAVKMLNVTAPTPLKLQAFKNEVGVLR*ACVNYSFPEKEVIFI	6	1	4	6	1	2		57.7617	8.34962	33.7095	58.7268	8.81943	18.0378		33.2736	28.528		1.16635
TGTGGCAGTGAAAATGTTGAATGTGACAGCACCTACACCTCAGTTACAAGCCTTCAAAAATGAAGTAGGAGTACTCACGTGAGCTTGTGTGAATTACTCTTTTCCAGAGAAAGAAGTTATTTTTATTAGCT	VAVKMLNVTAPTPQLQAFKNEVGVLT*ACVNYSFPEKEVIFIS	6	3	2	0	1	0		57.7617	25.0488	16.8547	0	8.81943	0		33.2218	2.93981		11.3007
TGTGGCAGTGAAAATGTTGAATGTGACAGCCCCTACACCTCAGTTACAAGCCTTCAAAAATGAAGTAGGAGTACTCAGGTGAGCTTGTGTGAATTACTCTTTTCCAGAGAAAGAAGTTATTTTTATTAGCT	VAVKMLNVTAPTPQLQAFKNEVGVLR*ACVNYSFPEKEVIFIS	6	4	1	1	0	0		57.7617	33.3985	8.42737	9.7878	0	0		33.1959	3.2626		10.1747
TGTGGCAGTGAAAATGTTGAATGTGACAGCACCTACACCTCAGCCTTCAAAAATGAAGTAGGGGTACTCAGGTGAGCTTGTGTGAATTACTCTTTTCCAGAGAAAGAAGTTATTTTTATTAGCTCCTGGTT	VAVKMLNVTAPTPQPSKMK*GYSGELV*ITLFQRKKLFLLAPG	5	2	4	2	4	14		48.1348	16.6992	33.7095	19.5756	35.2777	126.265		32.8478	60.3727		0.544084
TGTGGCAGTGAAAATGTTGAATGTGACAGCACCTACACCTCAGTTACAAGCCTTCAAAAAAGAAGTAGGAGTACTCAGGTGAGCTTGTGTGAATTACTCTTTTCCAGAGAAAGAAGTTATTTTTATTAGCT	VAVKMLNVTAPTPQLQAFKKEVGVLR*ACVNYSFPEKEVIFIS	5	4	2	3	2	2		48.1348	33.3985	16.8547	29.3634	17.6389	18.0378		32.796	21.68		1.51273
TGTGGCAGTGAAAATGTTGAATGTGACAGCACCTAGGTGAGCTTGTGTGAATTACTCTTTTCCAGAGAAAGAAGTTATTTTTATTAGCTCCTGGTTCCCAGTGGACAGTGCAGGGGAAAGAATAGTAGAAG	VAVKMLNVTAPR*ACVNYSFPEKEVIFISSWFPVDSAGERIVE	4	2	5	1	0	2		38.5078	16.6992	42.1368	9.7878	0	18.0378		32.448	9.27521		3.49835
TGTGGCAGTGAAAATGTTGAATGTGACAGCACCTACACAGTTACAAGCCTTCAAAAATGAAGTAGGAGTACTCAGGCGAGCTTGTGTGAATTACTCTTTTCCAGAGAAAGAAGTTATTTTTATTAGCTCCT	VAVKMLNVTAPTQLQAFKNEVGVLRRACVNYSFPEKEVIFISS	4	4	3	2	0	0		38.5078	33.3985	25.2821	19.5756	0	0		32.3961	6.5252		4.96477
TGTGGCAGTGAAAATGTTGAATGTGACAGCACCTACACCTCAGTTCAAGCCTTCAAAAATGAAGTAGGAGTACTCAGGTGAGCTTGTGTGAATTACTCTTTTCCAGAGAAAGAAGTTATTTTTATTAGCTC	VAVKMLNVTAPTPQFKPSKMK*EYSGELV*ITLFQRKKLFLLA	4	5	2	4	0	12		38.5078	41.7481	16.8547	39.1512	0	108.227		32.3702	49.1261		0.658921
TGTGGCAGTGAAAATGTTGAATGTGACAGCACCTACAAGCCTTCAAAAATGAAGTAGGAGTGCTCAGGTGAGCTTGTGTGAATTACTCTTTTCCAGAGAAAGAAGTTATTTTTATTAGCTCCTGGTTCCCA	VAVKMLNVTAPTSLQK*SRSAQVSLCELLFSRERSYFY*LLVP	4	5	2	2	2	12		38.5078	41.7481	16.8547	19.5756	17.6389	108.227		32.3702	48.4805		0.667695
TGTGGCAGTGAAAATGTTGAATGTGACAGCACCTACACCTCAGTTACAAGCCTTCAAAAATGAAGTAGGAGTACTCAGGTGAGCTTGTGAATTACTCTTTTCCAGAGAAAGAAGTTATTTTTATTAGCTCC	VAVKMLNVTAPTPQLQAFKNEVGVLR*ACELLFSRERSYFY*L	4	6	1	1	1	4		38.5078	50.0977	8.42737	9.7878	8.81943	36.0757		32.3443	18.2276		1.77446
TGTGGCAGTGAAAATGTTGAATGTGACAGCACCTACACCTCAGCACTCAGGTGAGCTTGTGTGAATTACTCTTTTCCAGAGAAAGAAGTTATTTTTATTAGCTCCTGGTTCCCAGTGGACAGTGCAGGGGA	VAVKMLNVTAPTPQHSGELV*ITLFQRKKLFLLAPGSQWTVQG	10	0	0	1	0	11		96.2696	0	0	9.7878	0	99.2081		32.0899	36.332		0.88324
TGTGGCAGTGAAAATGTTGAATGTGACAGCACCTACACCTCAGTTAGGTGTTACAAGCCTTCAAAAATGAAGTAGGAGTACTCAGGTGAGCTTGTGTGAATTACTCTTTTCCAGAGAAAGAAGTTATTTTT	VAVKMLNVTAPTPQLGVTSLQK*SRSTQVSLCELLFSRERSYF	10	0	0	0	3	2		96.2696	0	0	0	26.4583	18.0378		32.0899	14.832		2.16355
TGTGGCAGTGAAAATGTTGAATGTGACAGCACCTACACCTTCAAAATGAAGTTGTAGTGAAAATGTTGAATGTGACAGCACCTACACCTTCAAAATGAACTTCAAAATGAAGTTCAAAATGTTACAAGCCT	VAVKMLNVTAPTPSK*SCSENVECDSTYTFKMNFKMKFKMLQA	10	0	0	0	0	0		96.2696	0	0	0	0	0		32.0899	0		-1
TGTGGCAGTGAAAATGTTGAATGTGACAGCACAAGCCTTCAAAATGTGACAGTTACAAGCCTTCAAAAATGAAGTAGGAGTACTCAGGTGAGCTTGTGTGAATTACTCTTTTCCAGAGAAAGAAGTTATTT	VAVKMLNVTAQAFKM*QLQAFKNEVGVLR*ACVNYSFPEKEVI	10	0	0	0	0	0		96.2696	0	0	0	0	0		32.0899	0		-1
TGTGGCAGTGAAAATGTTGAATGTGACAGCACCTACACCTCAGAGGCAGTTACAAGCCTTCAAAAATGAAGTAGGAGTACTCAGGTGAGCTTGTGTGAATTACTCTTTTCCAGAGAAAGAAGTTATTTTTA	VAVKMLNVTAPTPQRQLQAFKNEVGVLR*ACVNYSFPEKEVIF	10	0	0	0	0	0		96.2696	0	0	0	0	0		32.0899	0		-1
TGTGGCAGTGAAAATGTTGAATGTGACAGCACCTACACCTCAGCCTTCAAAAATGAAATAGGAGTACTCAGGTGAGCTTGTGTGAATTACTCTTTTCCAGAGAAAGAAGTTATTTTTATTAGCTCCTGGTT	VAVKMLNVTAPTPQPSKMK*EYSGELV*ITLFQRKKLFLLAPG	2	5	4	7	2	7		19.2539	41.7481	33.7095	68.5146	17.6389	63.1325		31.5705	49.762		0.63443
TGTGGCAGTGAAAATGTTCAATGTGACAGCACCTACACCTCAGTTACAAGCCTTCAAAAATGAAGTAGGAGTACTCAGGTGAGCTTGTGTGAATTACTCTTTTCCAGAGAAAGAAGTTATTTTTATTAGCT	VAVKMFNVTAPTPQLQAFKNEVGVLR*ACVNYSFPEKEVIFIS	2	5	4	1	0	1		19.2539	41.7481	33.7095	9.7878	0	9.01892		31.5705	6.26891		5.03604
TGTGGCAGTGAAAATGTTGAATGTGACAGCACCTACAAGCCTTCAAAAATGAAGTAGGGGTACTCAGGTGAGCTTGTGTGAATTACTCTTTTCCAGAGAAAGAAGTTATTTTTATTAGCTCCTGGTTCCCA	VAVKMLNVTAPTSLQK*SRGTQVSLCELLFSRERSYFY*LLVP	2	7	2	10	5	7		19.2539	58.4473	16.8547	97.878	44.0972	63.1325		31.5187	68.3692		0.461007
TGTGGCAGTGAAAATGTTGAATGTGACAGCACCTACACCTCAGGTTACAAGCCTTCAAAAATGAGGTAGGAGTACTCAGGTGAGCTTGTGTGAATTACTCTTTTCCAGAGAAAGAAGTTATTTTTATTAGC	VAVKMLNVTAPTPQVTSLQK*GRSTQVSLCELLFSRERSYFY*	2	7	2	1	4	12		19.2539	58.4473	16.8547	9.7878	35.2777	108.227		31.5187	51.0975		0.616833
TGTGGCAGTGAAAATGTTCAGTTACAAGCCTTCAAAAATGAAGTAGGAGTACTCAGGTGAGCTTGTGTGAATTACTCTTTTCCAGAGAAAGAAGTTATTTTTATTAGCTCCTGGTTCCCAGTGGACAGTGC	VAVKMFSYKPSKMK*EYSGELV*ITLFQRKKLFLLAPGSQWTV	8	2	0	3	1	4		77.0156	16.6992	0	29.3634	8.81943	36.0757		31.2383	24.7528		1.26201
TGTGGCAGTGAAAATGTTGAATGTGACAGCACCTACAAATGAAGTAGGAGTACTCAGGTGAGCTTGTGTGAATTACTCTTTTCCAGAGAAAGAAGTTATTTTTATTAGCTCCTGGTTCCCAGTGGACAGTG	VAVKMLNVTAPTNEVGVLR*ACVNYSFPEKEVIFISSWFPVDS	1	5	5	5	17	23		9.62696	41.7481	42.1368	48.939	149.93	207.435		31.1706	135.435		0.230152
TGTGGCAGTGAAAATGTTGAATGTGACAGCACCTACATTTTTGAAGTTACAAGCCTTCAAAAATGAAGTAGGAGTACTCAGGTGAGCTTGTGTGAATTACTCTTTTCCAGAGAAAGAAGTTATTTTTATTA	VAVKMLNVTAPTFLKLQAFKNEVGVLR*ACVNYSFPEKEVIFI	1	5	5	0	0	0		9.62696	41.7481	42.1368	0	0	0		31.1706	0		-1
TGTGGCAGTGAAAATGTTGAATGTGACAGCACCTACAACCCAGTTACAAGCCTTCAAAAATGAAGTAGGAGTACTCAGGTGAGCTTGTGTGAATTACTCTTTTCCAGAGAAAGAAGTTATTTTTATTAGCT	VAVKMLNVTAPTTQLQAFKNEVGVLR*ACVNYSFPEKEVIFIS	1	7	3	0	0	4		9.62696	58.4473	25.2821	0	0	36.0757		31.1188	12.0252		2.58779
TGTGGCAGTGAAAATGTTGAATGTGACAGCACCTACACCTCAGCATCAGTTACAAGCCTTCAAAAATGAAGTAGGAGTACTCAGGTGAGCTTGTGTGAATTACTCTTTTCCAGAGAAAGAAGTTATTTTTA	VAVKMLNVTAPTPQHQLQAFKNEVGVLR*ACVNYSFPEKEVIF	1	8	2	2	2	1		9.62696	66.7969	16.8547	19.5756	17.6389	9.01892		31.0929	15.4111		2.01756
TGTGGCAGTGAAAATGTTGAATGTGACAGCACCTACACCTCAGTTACAAGCCTTCAAAAATGAAGTAGGAGTACTCAGGTGAGCTTGTGTGAATTACTCTTTTCCAGAGAAAGAAGTTTTTTTTATTAGCT	VAVKMLNVTAPTPQLQAFKNEVGVLR*ACVNYSFPEKEVFFIS	1	8	2	2	0	1		9.62696	66.7969	16.8547	19.5756	0	9.01892		31.0929	9.53151		3.26211
TGTGGCAGTGAAAATGTTGAATGTGACAGCACCTACACCTCAAAAATGAAGTACAAGCCTTCAAAAATGAAGTAGGAGTACTCAGGTGAGCTTGTGTGAATTACTCTTTTCCAGAGAAAGAAGTTATTTTT	VAVKMLNVTAPTPQK*STSLQK*SRSTQVSLCELLFSRERSYF	1	9	1	5	2	6		9.62696	75.1465	8.42737	48.939	17.6389	54.1135		31.067	40.2305		0.772225
TGTGGCAGTGAAAATGTTGAATGTGACAGCACCTACACCAGTAGGAGTACTCAGGTGAGCTTGTGTGAATTACTCTTTTCCAGAGAAAGAAGTTATTTTTATTAGCTCCTGGTTCCCAGTGGACAGTGCAG	VAVKMLNVTAPTPVGVLR*ACVNYSFPEKEVIFISSWFPVDSA	0	0	11	2	6	9		0	0	92.7011	19.5756	52.9166	81.1703		30.9004	51.2208		0.603277
TGTGGCAGTGAAAATGTTGAATGTGACAGCACCTACACCTCAGTGTGAATTACTCTTTTCCAGAGAAAGAAGTTATTTTTATTAGCTCCTGGTTCCCAGTGGACAGTGCAGGGGAAAGAATAGTAGAAGAT	VAVKMLNVTAPTPQCELLFSRERSYFY*LLVPSGQCRGKNSRR	0	0	11	2	5	2		0	0	92.7011	19.5756	44.0972	18.0378		30.9004	27.2369		1.1345
TGTGGCAGTGAAAATGTTGAATGTGACAGCACCTACACCTCACACAAGCCTTCAAAAATGAAGTAGGAGTACTCAGGTGAGCTTGTGTGAATTACTCTTTTCCAGAGAAAGAAGTTATTTTTATTAGCTCC	VAVKMLNVTAPTPHTSLQK*SRSTQVSLCELLFSRERSYFY*L	0	0	11	0	0	1		0	0	92.7011	0	0	9.01892		30.9004	3.00631		10.2785
TGTGGCAGTGAAAATGTTGAATGTGACAGCACCTACACCTTGTGTTACAAGCCTTCAAAAATGAAGTAGGAGTACTCAGGTGAGCTTGTGTGAATTACTCTTTTCCAGAGAAAGAAGTTATTTTTATTAGC	VAVKMLNVTAPTPCVTSLQK*SRSTQVSLCELLFSRERSYFY*	0	0	11	0	0	1		0	0	92.7011	0	0	9.01892		30.9004	3.00631		10.2785
TGTGGCAGTGAAAATGTTGAATGTGACAGCACCTATGTCTGAGTATATTTTTGTCTTTAACCACATTCTTTTAACTGCAGTTACAAGCCTTCAAAAATGAAGTAGGAGTACTCAGGTGAGCTTGTGTGAAT	VAVKMLNVTAPMSEYIFVFNHILLTAVTSLQK*SRSTQVSLCE	0	0	11	0	0	0		0	0	92.7011	0	0	0		30.9004	0		-1
TGTGGCATTAGGAGTACTCAGGTGAGCTTGTGTGAATTACTCTTTTCCAGAGAAAGAAGTTATTTTTATTAGCTCCTGGTTCCCAGTGGACAGTGCAGGGGAAAGAATAGTAGAAGATCGGAAGAGCACAC	VALGVLR*ACVNYSFPEKEVIFISSWFPVDSAGERIVEDRKST	0	0	11	0	0	0		0	0	92.7011	0	0	0		30.9004	0		-1
TGTGGCAGTGAAAATGTTGAATGTGACAGCACCTACACCTCAGCTCCTGGTTCCCAGTGGACAGTGCAGGGGAAAGAATAGTAGAAGATCGGAAGAGCACACGTCTGAACTCCAGTCACTTGAACATATCT	VAVKMLNVTAPTPQLLVPSGQCRGKNSRRSEEHTSELQSLEHI	0	0	11	0	0	0		0	0	92.7011	0	0	0		30.9004	0		-1
TGTGGCAGTGAAAATGTTGAATGTGACAGCACCTACACCTCAAAAATGAAGTTACAAGATAACTTTCAGAAGATAGAAACAGCAAAAACCTGCTAAAAAGTTGTTAGCAGTTACAAGCCTTCAAAAATGAA	VAVKMLNVTAPTPQK*SYKITFRR*KQQKPAKKLLAVTSLQK*	0	0	11	0	0	0		0	0	92.7011	0	0	0		30.9004	0		-1
TGTGGCAGTGAAAATGTTATTTTTATTAGCTCCTGGTTCCCAGTGGACAGTGCAGGGGAAAGAATAGTAGAAGATCGGAAGAGCACACGTCTGAACTCCAGTCACTTGAACATATCTCGTATGCCGTCTTC	VAVKMLFLLAPGSQWTVQGKE**KIGRAHV*TPVT*TYLVCRL	0	0	11	0	0	0		0	0	92.7011	0	0	0		30.9004	0		-1
TGTGGCAGTGAAAATGTTGAATGTGACAGCAATGAAGTAGGAGTACTCAGGTGAGCTTGTGTGAATTACTCTTTTCCAGAGAAAGAAGTTATTTTTATTAGCTCCTGGTTCCCAGTGGACAGTGCAGGGGA	VAVKMLNVTAMK*EYSGELV*ITLFQRKKLFLLAPGSQWTVQG	0	6	5	2	6	4		0	50.0977	42.1368	19.5756	52.9166	36.0757		30.7448	36.1893		0.849556
TGTGGCAGTGAAAATGTTGAATGTGACAGCACCTACACCTCAGCCTTCAAAGCCTTCAAAAATGAAGTAGGAGTACTCAGGTGAGCTTGTGTGAATTACTCTTTTCCAGAGAAAGAAGTTATTTTTATTAG	VAVKMLNVTAPTPQPSKPSKMK*EYSGELV*ITLFQRKKLFLL	0	10	1	0	1	2		0	83.4962	8.42737	0	8.81943	18.0378		30.6412	8.95242		3.42267
TGTGGCAGTGAAAATGTTGAATGTGACAGCACCTACACCTTGAAGTTACAAGCCTTCAAAAATGAAGTAGGAGTACTCAGGTGAGCTTGTGTGAATTACTCTTTTCCAGAGAAAGAAGTTATTTTTATTAG	VAVKMLNVTAPTP*SYKPSKMK*EYSGELV*ITLFQRKKLFLL	0	11	0	3	1	12		0	91.8458	0	29.3634	8.81943	108.227		30.6153	48.8033		0.627319
TGTGGCAGTGAAAATGTTGAATGTGACAGCACCTACACCTCAGGTGTAGGAGTTACAAGCCTTCAAAAATGAAGTAGGAGTACTCAGGTGAGCTTGTGTGAATTACTCTTTTCCAGAGAAAGAAGTTATTT	VAVKMLNVTAPTPQV*ELQAFKNEVGVLR*ACVNYSFPEKEVI	0	11	0	0	0	7		0	91.8458	0	0	0	63.1325		30.6153	21.0442		1.45481
TGTGGCAGTGAAAATGTTGAATGTGACAGCACCTCAGGTGAGCTTGTGTGAATTACTCTTTTCCAGAGAAAGAAGTTATTTTTATTAGCTCCTGGTTCCCAGTGGACAGTGCAGGGGAAAGAATAGTAGAA	VAVKMLNVTAPQVSLCELLFSRERSYFY*LLVPSGQCRGKNSR	0	11	0	0	0	2		0	91.8458	0	0	0	18.0378		30.6153	6.01261		5.09184
TGTGGCAGTGAAAATGTTGAATGTGACAGCACCAATGTTACAAGCCTTCAAAAATGAAGTAGGAGTACTCAGGTGAGCTTGTGTGAATTACTCTTTTCCAGAGAAAGAAGTTATTTTTATTAGCTCCTGGT	VAVKMLNVTAPMLQAFKNEVGVLR*ACVNYSFPEKEVIFISSW	0	11	0	0	0	0		0	91.8458	0	0	0	0		30.6153	0		-1
TGTGGCAGTGAAAATGTTGAATGTGACAGCACCTACACCTCATACTTTACAAGCCTTCAAAAATGAAGTAGGAGTACTCAGGTGAGCTTGTGTGAATTACTCTTTTCCAGAGAAAGAAGTTATTTTTATTA	VAVKMLNVTAPTPHTLQAFKNEVGVLR*ACVNYSFPEKEVIFI	0	11	0	0	0	0		0	91.8458	0	0	0	0		30.6153	0		-1
TGTGGCAGTGAAAATGTTGAATGTGACAGCACCTTCAAAATGAAGGTGCTTCATTTTGAAGGCCTTCAAAAATGAAGTAGGAGTACTCAGGTGAGCTTGTGTGAATTACTCTTTTCCAGAGAAAGAAGTTA	VAVKMLNVTAPSK*RCFILKAFKNEVGVLR*ACVNYSFPEKEV	0	11	0	0	0	0		0	91.8458	0	0	0	0		30.6153	0		-1
TGTGGCAGTGAAAATGTTGAATGTGACAGCACCTACACCTTTTTTTTGTAACTTTTTGAAGCAGTTACAAGCCTTCAAAAATGAAGTAGGAGTACTCAGGTGAGCTTGTGTGAATTACTCTTTTCCAGAGA	VAVKMLNVTAPTPFFCNFLKQLQAFKNEVGVLR*ACVNYSFPE	0	11	0	0	0	0		0	91.8458	0	0	0	0		30.6153	0		-1
TGTGGCAGTGAAAATGTTGAATGTGACAGCACCTACACCTCAGGAATAACTGAAGGCTTCAAAAATGAAGTAGGAGTACTCAGGTGAGCTTGTGTGAATTACTCTTTTCCAGAGAAAGAAGTTATTTTTAT	VAVKMLNVTAPTPQE*LKASKMK*EYSGELV*ITLFQRKKLFL	0	11	0	0	0	0		0	91.8458	0	0	0	0		30.6153	0		-1
TGTGGCAGTGAAAATGTTGAATGTGACAGCACCCAAGCCTTCAAAAATGAAGTAGGAGTACTCAGGTGAGCTTGTGTGAATTACTCTTTTCCAGAGAAAGAAGTTATTTTTATTAGCTCCTGGTTCCCAGT	VAVKMLNVTAPKPSKMK*EYSGELV*ITLFQRKKLFLLAPGSQ	6	1	3	8	2	2		57.7617	8.34962	25.2821	78.3024	17.6389	18.0378		30.4645	37.993		0.801844
TGTGGCAGTGAAAATGTTGAATGTGACAGCACCTACACCTCAGTTACAAGCCTTCAAAAATGAAGTAGGAGTACTCAGGTGAGCTTGTGTGAATTACTCTTTTCCAGAGAAAGAAGTTATTTTTTATTAGC	VAVKMLNVTAPTPQLQAFKNEVGVLR*ACVNYSFPEKEVIFY*	6	2	2	2	2	1		57.7617	16.6992	16.8547	19.5756	17.6389	9.01892		30.4386	15.4111		1.9751
TGTGGCAGTGAAAATGTTGAATGTGACTCAGTTACAAGCCTTCAAAAATGAAGTAGGAGTACTCAGGTGAGCTTGTGTGAATTACTCTTTTCCAGAGAAAGAAGTTATTTTTATTAGCTCCTGGTTCCCAG	VAVKMLNVTQLQAFKNEVGVLR*ACVNYSFPEKEVIFISSWFP	6	4	0	1	0	0		57.7617	33.3985	0	9.7878	0	0		30.3867	3.2626		9.31365
TGTGGCAGTGAAAATGTTGAATGTGACAGCACCTACACCTCAGTTAGTTACAAGCCTTCAAAAATGAAGTAGGAGTACTCAGGTGAGCTTGTGTGAATTACTCTTTTCCAGAGAAAGAAGTTATTTTTATT	VAVKMLNVTAPTPQLVTSLQK*SRSTQVSLCELLFSRERSYFY	5	5	0	5	7	30		48.1348	41.7481	0	48.939	61.736	270.568		29.961	127.081		0.235763
TGTGGCAGTGAAAATGTTGAATGTGACAGCACCTACAAACAGTTACAAGCCTTCAAAAATGAAGTAGGAGTACTCAGGTGAGCTTGTGTGAATTACTCTTTTCCAGAGAAAGAAGTTATTTTTATTAGCTC	VAVKMLNVTAPTNSYKPSKMK*EYSGELV*ITLFQRKKLFLLA	4	1	5	6	4	4		38.5078	8.34962	42.1368	58.7268	35.2777	36.0757		29.6648	43.3601		0.684149
TGTGGCAGTGAAAATGTTGAATGTGACAGCACCTACACCTCAAAAATGAAGTAGGAGTACTCGGGTGAGCTTGTGTGAATTACTCTTTTCCAGAGAAAGAAGTTATTTTTATTAGCTCCTGGTTCCCAGTG	VAVKMLNVTAPTPQK*SRSTRVSLCELLFSRERSYFY*LLVPS	4	1	5	4	4	3		38.5078	8.34962	42.1368	39.1512	35.2777	27.0568		29.6648	33.8286		0.876915
TGTGGCAGTGAAAATGTTGAATGTGACAGCACCTACACCTCAGTTACAAGCCTTCAAAAATGAAGTAGGAGTACTCAGGTGAGCTTGTGTGAATTCCTCTTTTCCAGAGAAAGAAGTTATTTTTATTAGCT	VAVKMLNVTAPTPQLQAFKNEVGVLR*ACVNSSFPEKEVIFIS	4	2	4	0	0	1		38.5078	16.6992	33.7095	0	0	9.01892		29.6388	3.00631		9.85889
TGTGGCAGTGAAAATGTTGAATGTGACAGCACCTACACCTCAGCCTTCAAAAATGAAGTAGGAGTGCTCAGGTGAGCTTGTGTGAATTACTCTTTTCCAGAGAAAGAAGTTATTTTTATTAGCTCCTGGTT	VAVKMLNVTAPTPQPSKMK*ECSGELV*ITLFQRKKLFLLAPG	4	3	3	2	3	7		38.5078	25.0488	25.2821	19.5756	26.4583	63.1325		29.6129	36.3888		0.813793
TGTGGCAGTGAAAATGTTGAATGTGACAGCACCTACACCGAAGTAGGAGTACTCAGGTGAGCTTGTGTGAATTACTCTTTTCCAGAGAAAGAAGTTATTTTTATTAGCTCCTGGTTCCCAGTGGACAGTGC	VAVKMLNVTAPTPK*EYSGELV*ITLFQRKKLFLLAPGSQWTV	3	0	7	1	8	9		28.8809	0	58.9916	9.7878	70.5554	81.1703		29.2908	53.8378		0.544056
TGTGGCAGTGAAAATGTTGAATGTGACAGCACCTACACAGTTACAAGCCTTCAAAAATGAAGTAGGAGTACTCAGGTGAGCTTGTGCGAATTACTCTTTTCCAGAGAAAGAAGTTATTTTTATTAGCTCCT	VAVKMLNVTAPTQLQAFKNEVGVLR*ACANYSFPEKEVIFISS	3	1	6	1	1	3		28.8809	8.34962	50.5642	9.7878	8.81943	27.0568		29.2649	15.2213		1.92262
TGTGGCAGTGAAAATGTTGAATGTGACAGCACCTACACTCAGGTGAGCTTGTGTGAATTACTCTTTTCCAGAGAAAGAAGTTATTTTTATTAGCTCCTGGTTCCCAGTGGACAGTGCAGGGGAAAGAATAG	VAVKMLNVTAPTLR*ACVNYSFPEKEVIFISSWFPVDSAGERI	3	2	5	8	14	9		28.8809	16.6992	42.1368	78.3024	123.472	81.1703		29.239	94.3149		0.310014
TGTGGCAGTGAAACTGTTGAATGTGACAGCACCTACACCTCAGTTACAAGCCTTCAAAAATGAAGTAGGAGTACTCAGGTGAGCTTGTGTGAATTACTCTTTTCCAGAGAAAGAAGTTATTTTTATTAGCT	VAVKLLNVTAPTPQLQAFKNEVGVLR*ACVNYSFPEKEVIFIS	3	3	4	0	0	4		28.8809	25.0488	33.7095	0	0	36.0757		29.2131	12.0252		2.42931
TGTGGCAGTGAAAATGTTGAATGTGACAGCACCTAAGTAGGAGTACTCAGGTGAGCTTGTGTGAATTACTCTTTTCCAGAGAAAGAAGTTATTTTTATTAGCTCCTGGTTCCCAGTGGACAGTGCAGGGGA	VAVKMLNVTAPK*EYSGELV*ITLFQRKKLFLLAPGSQWTVQG	3	4	3	9	9	15		28.8809	33.3985	25.2821	88.0902	79.3749	135.284		29.1871	100.916		0.289221
TGTGGCAGTGAAAATGTTGAATGTGACAGCACCTACACCTCAGCATGAAGTAGGAGTACTCAGGTGAGCTTGTGTGAATTACTCTTTTCCAGAGAAAGAAGTTATTTTTATTAGCTCCTGGTTCCCAGTGG	VAVKMLNVTAPTPQHEVGVLR*ACVNYSFPEKEVIFISSWFPV	3	5	2	3	9	20		28.8809	41.7481	16.8547	29.3634	79.3749	180.378		29.1612	96.3722		0.302589
TGTGGCAGTGAAAATGTTGAATGTGACAGCACGTTACAAGCCTTCAAAAATGAAGTAGGAGTACTCAGGTGAGCTTGTGTGAATTACTCTTTTCCAGAGAAAGAAGTTATTTTTATTAGCTCCTGGTTCCC	VAVKMLNVTARYKPSKMK*EYSGELV*ITLFQRKKLFLLAPGS	3	5	2	4	7	4		28.8809	41.7481	16.8547	39.1512	61.736	36.0757		29.1612	45.6543		0.63874
TGTGGCAGTGAAAATGTTGAATGTGACACCACCTACACCTCAGTTACAAGCCTTCAAAAATGAAGTAGGAGTACTCAGGTGAGCTTGTGTGAATTACTCTTTTCCAGAGAAAGAAGTTATTTTTATTAGCT	VAVKMLNVTPPTPQLQAFKNEVGVLR*ACVNYSFPEKEVIFIS	3	5	2	0	1	1		28.8809	41.7481	16.8547	0	8.81943	9.01892		29.1612	5.94612		4.90425
TGTGGCAGTGAAAATGTTGAATGTAGGAGTACTCAGGTGAGCTTGTGTGAATTACTCTTTTCCAGAGAAAGAAGTTATTTTTATTAGCTCCTGGTTCCCAGTGGACAGTGCAGGGGAAAGAATAGTAGAAG	VAVKMLNVGVLR*ACVNYSFPEKEVIFISSWFPVDSAGERIVE	9	0	0	7	5	7		86.6426	0	0	68.5146	44.0972	63.1325		28.8809	58.5814		0.493004
TGTGGCAGTGAAAATGTTGAATGTGACAGCACCTACACCTCAGGTAGGTGTACAAGCCTTCAAAAATGAAGTAGGAGTACTCAGGTGAGCTTGTGTGAATTACTCTTTTCCAGAGAAAGAAGTTATTTTTA	VAVKMLNVTAPTPQVGVQAFKNEVGVLR*ACVNYSFPEKEVIF	9	0	0	1	3	1		86.6426	0	0	9.7878	26.4583	9.01892		28.8809	15.0883		1.91412
TGTGGCAGTGAAAATGTTGAATGTTACAAGTTACAAGCCTTCAAAAATGAAGTAGGAGTACTCAGGTGAGCTTGTGTGAATTACTCTTTTCCAGAGAAAGAAGTTATTTTTATTAGCTCCTGGTTCCCAGT	VAVKMLNVTSYKPSKMK*EYSGELV*ITLFQRKKLFLLAPGSQ	9	0	0	0	1	4		86.6426	0	0	0	8.81943	36.0757		28.8809	14.965		1.92989
TGTGGCAGTGAAAATGTTGAATGTGACAGCACCTACATCTCAGAGAAAGAAGTTATTTTTATTAGCTCCTGGTTCCCAGTGGACAGTGCAGGGGAAAGAATAGTAGAAGATCGGAAGAGCACACGTCTGAA	VAVKMLNVTAPTSQRKKLFLLAPGSQWTVQGKE**KIGRAHV*	9	0	0	1	0	0		86.6426	0	0	9.7878	0	0		28.8809	3.2626		8.8521
TGTGGCAGTGAAAATGTTGAATGTGACAGCACCTACACCTCAGCAACTCAGGTGAGCTTGTGTGAATTACTCTTTTCCAGAGAAAGAAGTTATTTTTATTAGCTCCTGGTTCCCAGTGGACAGTGCAGGGG	VAVKMLNVTAPTPQQLR*ACVNYSFPEKEVIFISSWFPVDSAG	9	0	0	0	0	1		86.6426	0	0	0	0	9.01892		28.8809	3.00631		9.60676
TGTGGCAGTGAAAATGTTGAATGTGACAGCACCTACACCTCAAAATGTAGCCTTCAAAAATGAAGTAGGAGTACTCAGGTGAGCTTGTGTGAATTACTCTTTTCCAGAGAAAGAAGTTATTTTTATTAGCT	VAVKMLNVTAPTPQNVAFKNEVGVLR*ACVNYSFPEKEVIFIS	9	0	0	0	1	0		86.6426	0	0	0	8.81943	0		28.8809	2.93981		9.82406
TGTGGCAGTGAAAATGAGTTACAAGCCTTCAAAAATGAAGTAGGAGTACTCAGGTGAGCTTGTGTGAATTACTCTTTTCCAGAGAAAGAAGTTATTTTTATTAGCTCCTGGTTCCCAGTGGACAGTGCAGG	VAVKMSYKPSKMK*EYSGELV*ITLFQRKKLFLLAPGSQWTVQ	9	0	0	0	0	0		86.6426	0	0	0	0	0		28.8809	0		-1
TGTGGCAGTGAAAATGTTGAATGTGACAGGCCTTCAAAATGAAGGCCTTCAAAATGACAGGCCTTCAAAAATGAAGTAGGAGTACTCAGGTGAGCTTGTGTGAATTACTCTTTTCCAGAGAAAGAAGTTAT	VAVKMLNVTGLQNEGLQNDRPSKMK*EYSGELV*ITLFQRKKL	9	0	0	0	0	0		86.6426	0	0	0	0	0		28.8809	0		-1
TGTGGCAGTGAAAATGTTGAATGTGACAGCACCTACACCTCAGGAACAACCTTGTTTGTTACAAGCCTTCAAAAATGAAGTAGGAGTACTCAGGTGAGCTTGTGTGAATTACTCTTTTCCAGAGAAAGAAG	VAVKMLNVTAPTPQEQPCLLQAFKNEVGVLR*ACVNYSFPEKE	9	0	0	0	0	0		86.6426	0	0	0	0	0		28.8809	0		-1
TGTGGCAGTGAAAATGTTGAATGTGACAGCACCTACACCTCAAGCCTTCAAAAATGAGGTAGGAGTACTCAGGTGAGCTTGTGTGAATTACTCTTTTCCAGAGAAAGAAGTTATTTTTATTAGCTCCTGGT	VAVKMLNVTAPTPQAFKNEVGVLR*ACVNYSFPEKEVIFISSW	2	2	6	5	5	3		19.2539	16.6992	50.5642	48.939	44.0972	27.0568		28.8391	40.031		0.72042
TGTGGCAGTGAAAATGTTGAATGTGACAGCACCTACGTAGGAGTACTCAGGTGAGCTTGTGTGAATTACTCTTTTCCAGAGAAAGAAGTTATTTTTATTAGCTCCTGGTTCCCAGTGGACAGTGCAGGGGA	VAVKMLNVTAPT*EYSGELV*ITLFQRKKLFLLAPGSQWTVQG	2	2	6	5	1	4		19.2539	16.6992	50.5642	48.939	8.81943	36.0757		28.8391	31.278		0.922024
TGTGGCAGTGAAAATGTTGAATGTGACAGCACCTACACCTCAGTTACAAGCCTTCAAAAATGAAGTAGGAGTACTCAGGTGAGCTTGTGTGAATTACTCTTTTCCAGAGACCGAAGTTATTTTTATTAGCT	VAVKMLNVTAPTPQLQAFKNEVGVLR*ACVNYSFPETEVIFIS	2	4	4	2	1	1		19.2539	33.3985	33.7095	19.5756	8.81943	9.01892		28.7873	12.4713		2.30828
TGTGGCAGTGAAAATGTTGAATGTGACAGCACCTACACCTCAGGTTACAAGCCTTCAAAAATGGAGTAGGAGTACTCAGGTGAGCTTGTGTGAATTACTCTTTTCCAGAGAAAGAAGTTATTTTTATTAGC	VAVKMLNVTAPTPQVTSLQKWSRSTQVSLCELLFSRERSYFY*	2	5	3	3	1	6		19.2539	41.7481	25.2821	29.3634	8.81943	54.1135		28.7614	30.7655		0.934859
TGTGGCAGTGAAAATGTTGAATGTGACAGCACCTACACCTCAGTTACAAGCCTCAAAAATGAAGTAGGAGTACTCAGGTGAGCTTGTGTGAATTACTCTTTTCCAGAGAAAGAAGTTATTTTTATTAGCTC	VAVKMLNVTAPTPQLQASKMK*EYSGELV*ITLFQRKKLFLLA	2	7	1	1	0	3		19.2539	58.4473	8.42737	9.7878	0	27.0568		28.7095	12.2815		2.33762
TGTGGCAGTGAAAATGTTGAATGTTACAAGCCTTCAAAATGAAGTAGGAGTACTCAGGTGAGCTTGTGTGAATTACTCTTTTCCAGAGAAAGAAGTTATTTTTATTAGCTCCTGGTTCCCAGTGGACAGTG	VAVKMLNVTSLQNEVGVLR*ACVNYSFPEKEVIFISSWFPVDS	2	8	0	7	4	0		19.2539	66.7969	0	68.5146	35.2777	0		28.6836	34.5974		0.829067
TGTGGCAGTGAAAATGTTGAATGTGACAGCACCTACACCTTCTTTTCCAGAGAAAGAAGTTATTTTTATTAGCTCCTGGTTCCCAGTGGACAGTGCAGGGGAAAGAATAGTAGAAGATCGGAAGAGCACAC	VAVKMLNVTAPTPSFPEKEVIFISSWFPVDSAGERIVEDRKST	8	0	1	2	2	5		77.0156	0	8.42737	19.5756	17.6389	45.0946		28.481	27.4364		1.03808
TGTGGCAGTGAAAATGTTGAATGTGACAGCACCAAAATGAAGTAGGAGTACTCAGGTGAGCTTGTGTGAATTACTCTTTTCCAGAGAAAGAAGTTATTTTTATTAGCTCCTGGTTCCCAGTGGACAGTGCA	VAVKMLNVTAPK*SRSTQVSLCELLFSRERSYFY*LLVPSGQC	8	1	0	3	2	2		77.0156	8.34962	0	29.3634	17.6389	18.0378		28.4551	21.68		1.3125
TGTGGCAGTGAAAATGTTGAATGTGACAGCACCTACACCTCAGTTACAAGCCTTCAAAAATGAAGTAGGAGTACTCAGGTGAGCTTGTGTGAATTACTCTTTTCCAGAGAAAGAAGTTATTTTTCTTAGCT	VAVKMLNVTAPTPQLQAFKNEVGVLR*ACVNYSFPEKEVIFLS	1	4	5	0	0	1		9.62696	33.3985	42.1368	0	0	9.01892		28.3874	3.00631		9.44262
TGTGGCAGTGAAAATGTTGAATGTGACAGCACCTACACCTCAGTTACCAGCCTTCAAAAATGAAGTAGGAGTACTCAGGTGAGCTTGTGTGAATTACTCTTTTCCAGAGAAAGAAGTTATTTTTATTAGCT	VAVKMLNVTAPTPQLPAFKNEVGVLR*ACVNYSFPEKEVIFIS	1	5	4	0	1	1		9.62696	41.7481	33.7095	0	8.81943	9.01892		28.3615	5.94612		4.76975
TGTGGCAGTGAAAATGTTGAATGTGACAGCACCTACAACCAGTTACAAGCCTTCAAAAATGAAGTAGGAGTACTCAGGTGAGCTTGTGTGAATTACTCTTTTCCAGAGAAAGAAGTTATTTTTATTAGCTC	VAVKMLNVTAPTTSYKPSKMK*EYSGELV*ITLFQRKKLFLLA	1	6	3	12	5	14		9.62696	50.0977	25.2821	117.454	44.0972	126.265		28.3356	95.9386		0.295351
TGTGGCAGTGAAAATGTTGAATGTGACAGCACCTACACCTCAGCCTTCAAAATGAAGTACAAGCCTTCAAAAATGAAGTAGGAGTACTCAGGTGAGCTTGTGTGAATTACTCTTTTCCAGAGAAAGAAGTT	VAVKMLNVTAPTPQPSK*STSLQK*SRSTQVSLCELLFSRERS	1	7	2	0	0	5		9.62696	58.4473	16.8547	0	0	45.0946		28.3097	15.0315		1.88335
TGTGGCAGTGAAAATGTTGAATGTGACAGCACCTACACCTCAGCCTTCAAAAATGTTACAAGCCTTCAAAAATGAAGTAGGAGTACTCAGGTGAGCTTGTGTGAATTACTCTTTTCCAGAGAAAGAAGTTA	VAVKMLNVTAPTPQPSKMLQAFKNEVGVLR*ACVNYSFPEKEV	1	8	1	1	0	2		9.62696	66.7969	8.42737	9.7878	0	18.0378		28.2837	9.27521		3.04939
TGTGGCAGTGAAAATGTTGAATGTGACAGCACCTACACCTCAGTTACAAGCCTTCAAAAATGAAGTAGGAGTACTCAGGTGAGCTTGTGTGAATTACTCTTTTCCAGAGAAACAAGTTATTTTTATTAGCT	VAVKMLNVTAPTPQLQAFKNEVGVLR*ACVNYSFPEKQVIFIS	1	8	1	1	1	1		9.62696	66.7969	8.42737	9.7878	8.81943	9.01892		28.2837	9.20872		3.07141
TGTGGCAGTGAAAATGTTGAATGTGACAGCACCTACACTTGTTACAAGCCTTCAAAAATGAAGTAGGAGTACTCAGGTGAGCTTGTGTGAATTACTCTTTTCCAGAGAAAGAAGTTATTTTTATTAGCTCC	VAVKMLNVTAPTLVTSLQK*SRSTQVSLCELLFSRERSYFY*L	1	9	0	2	3	2		9.62696	75.1465	0	19.5756	26.4583	18.0378		28.2578	21.3572		1.3231
TGTGGCAGTGAAAATGTTGAATGTGACAGCACCTACACCTTGAAGACAAGCCTTCAAAAATGAAGTAGGAGTACTCAGGTGAGCTTGTGTGAATTACTCTTTTCCAGAGAAAGAAGTTATTTTTATTAGCT	VAVKMLNVTAPTP*RQAFKNEVGVLR*ACVNYSFPEKEVIFIS	0	0	10	0	0	3		0	0	84.2737	0	0	27.0568		28.0912	9.01892		3.1147
TGTGGCAGTGAAAATGTTGAATGTGACAGCACCTACACCTCAGTGTCAAGCCTTCAAAAATGAAGTAGGAGTACTCAGGTGAGCTTGTGTGAATTACTCTTTTCCAGAGAAAGAAGTTATTTTTATTAGCT	VAVKMLNVTAPTPQCQAFKNEVGVLR*ACVNYSFPEKEVIFIS	0	0	10	1	0	0		0	0	84.2737	9.7878	0	0		28.0912	3.2626		8.61007
TGTGGCAGTGAAAATGTTGAATGTGACAGCACCTACACCTCAGGTGCTGAGGTTACAAGCCTTCAAAAATGAAGTAGGAGTACTCAGGTGAGCTTGTGTGAATTACTCTTTTCCAGAGAAAGAAGTTATTT	VAVKMLNVTAPTPQVLRLQAFKNEVGVLR*ACVNYSFPEKEVI	0	0	10	0	0	0		0	0	84.2737	0	0	0		28.0912	0		-1
TGTGGCAGTGAAAATGTTGAGAAGTAGGAGTACTCAGGTGAGCTTGTGTGAATTACTCTTTTCCAGAGAAAGAAGTTATTTTTATTAGCTCCTGGTTCCCAGTGGACAGTGCAGGGGAAAGAATAGTAGAA	VAVKMLRSRSTQVSLCELLFSRERSYFY*LLVPSGQCRGKNSR	0	0	10	0	0	0		0	0	84.2737	0	0	0		28.0912	0		-1
TGTGGCAGTGAAAATGTTGAATGTGACAGCACCTACACCTCCTGGTTCCCAGTGGACAGTGCAGGGGAAAGAATAGTAGAAGATCGGAAGAGCACACGTCTGAACTCCAGTCACTTGAACATATCTCGTAT	VAVKMLNVTAPTPPGSQWTVQGKE**KIGRAHV*TPVT*TYLV	0	0	10	0	0	0		0	0	84.2737	0	0	0		28.0912	0		-1
TGTGGCAGTGAAAATGTTGAATGTGACAGCACCTACACCTCAGTTACAAGCCTTCAAAAATGAAGTAGGAGTACTCAGGTGAGCTTGTGTGAATTACTCTTTTCCAGAGAAAGAAGTTATTTATTAGCTCC	VAVKMLNVTAPTPQLQAFKNEVGVLR*ACVNYSFPEKEVIY*L	0	1	9	0	0	2		0	8.34962	75.8463	0	0	18.0378		28.0653	6.01261		4.66774
TGTGGCAGTGAAAATGTTGAATGTGACAGCACCTACACCTCAGCTTGTGTGAATTACTCTTTTCCAGAGAAAGAAGTTATTTTTATTAGCTCCTGGTTCCCAGTGGACAGTGCAGGGGAAAGAATAGTAGA	VAVKMLNVTAPTPQLV*ITLFQRKKLFLLAPGSQWTVQGKE**	0	4	6	6	10	17		0	33.3985	50.5642	58.7268	88.1943	153.322		27.9876	100.081		0.279649
TGTGGCAGTGAAAATGTTGAATGTGACAGCACCTACACCTCAGGTCCTTCAAAAATGAAGTAGGAGTACTCAGGTGAGCTTGTGTGAATTACTCTTTTCCAGAGAAAGAAGTTATTTTTATTAGCTCCTGG	VAVKMLNVTAPTPQVLQK*SRSTQVSLCELLFSRERSYFY*LL	0	8	2	0	0	0		0	66.7969	16.8547	0	0	0		27.8839	0		-1
TGTGGCAGTGAAAATGTTGAATGTGACAGCACCTACACCTCAGAAGTTATTTTTATTAGCTCCTGGTTCCCAGTGGACAGTGCAGGGGAAAGAATAGTAGAAGATCGGAAGAGCACACGTCTGAACTCCAG	VAVKMLNVTAPTPQKLFLLAPGSQWTVQGKE**KIGRAHV*TP	0	9	1	9	7	14		0	75.1465	8.42737	88.0902	61.736	126.265		27.858	92.0304		0.302704
TGTGGCAGTGAAAATGTTGAATGTGACAGCACCTACACCTCAGGTGTAACAAGCCTTCAAAATGAAGTAGGAGTACTCAGGTGAGCTTGTGTGAATTACTCTTTTCCAGAGAAAGAAGTTATTTTTATTAG	VAVKMLNVTAPTPQV*QAFKMK*EYSGELV*ITLFQRKKLFLL	0	10	0	0	2	3		0	83.4962	0	0	17.6389	27.0568		27.8321	14.8985		1.86811
TGTGGCAGTGAAAATGTTGAATGTGACAGCACCTACACCTCAGTTACAAGCCTTCAAAAATGAAGTAGGAGTACTCAGGTGAGCTTGTGTGAATTACTCTTTTCCAGAGAAAAGAAGTTATTTTTATTAGC	VAVKMLNVTAPTPQLQAFKNEVGVLR*ACVNYSFPEKRSYFY*	0	10	0	0	0	1		0	83.4962	0	0	0	9.01892		27.8321	3.00631		9.25789
TGTGGCAGTGAAAATGTTGAATGTGACAGCACCTACACCTCACTGCTGAGGTTACAAGCCTTCAAAAATGAAGTAGGAGTACTCAGGTGAGCTTGTGTGAATTACTCTTTTCCAGAGAAAGAAGTTATTTT	VAVKMLNVTAPTPHC*GYKPSKMK*EYSGELV*ITLFQRKKLF	0	10	0	0	0	0		0	83.4962	0	0	0	0		27.8321	0		-1
TGTGGCAGTGAAAATGTTGAATGTGACAGCACAACAGTTACAAGCCTTCAAAAATGAAGTAGGAGTACTCAGGTGAGCTTGTGTGAATTACTCTTTTCCAGAGAAAGAAGTTATTTTTATTAGCTCCTGGT	VAVKMLNVTAQQLQAFKNEVGVLR*ACVNYSFPEKEVIFISSW	0	10	0	0	0	0		0	83.4962	0	0	0	0		27.8321	0		-1
TGTGGCAGTGAAAGAAGTTATTTTTATTAGCTCCTGGTTCCCAGTGGACAGTGCAGGGGAAAGAATAGTAGAAGATCGGAAGAGCACACGTCTGAACTCCAGTCACAACTTGGCATCTCGTATGCCGTCTT	VAVKEVIFISSWFPVDSAGERIVEDRKSTRLNSSHNLASRMPS	0	10	0	0	0	0		0	83.4962	0	0	0	0		27.8321	0		-1
TGTGGCAGTGAAAATGTTGAATGTGACAGCACCTACACTCCCAAGTAGGTTACAAGCCTTCAAAAATGAAGTAGGAGTACTCAGGTGAGCTTGTGTGAATTACTCTTTTCCAGAGAAAGAAGTTATTTTTA	VAVKMLNVTAPTLPSRLQAFKNEVGVLR*ACVNYSFPEKEVIF	0	10	0	0	0	0		0	83.4962	0	0	0	0		27.8321	0		-1
TGTGGCAGTGAAAATGTTGAATGTGACAGCACCTACACCTCAGTTGTAACCTTCAAAAATGAAGTAGGAGTACTCAGGTGAGCTTGTGTGAATTACTCTTTTCCAGAGAAAGAAGTTATTTTTATTAGCTC	VAVKMLNVTAPTPQL*PSKMK*EYSGELV*ITLFQRKKLFLLA	0	10	0	0	0	0		0	83.4962	0	0	0	0		27.8321	0		-1
TGTGGCAGTGAAAATGTTGAATGTGACAGCACCTACACCTCAGATGTACAAGCCTTCAAAAATGAAGTAGGAGTACTCAGGTGAGCTTGTGTGAATTACTCTTTTCCAGAGAAAGAAGTTATTTTTATTAG	VAVKMLNVTAPTPQMYKPSKMK*EYSGELV*ITLFQRKKLFLL	0	10	0	0	0	0		0	83.4962	0	0	0	0		27.8321	0		-1
TGTGGCAGTGAAAATGTTGAATGTGACAGCACCTACACCTCAAAAGTTACAGTTACAAGCCTTCAAAAATGAAGTAGGAGTACTCAGGTGAGCTTGTGTGAATTACTCTTTTCCAGAGAAAGAAGTTATTT	VAVKMLNVTAPTPQKLQLQAFKNEVGVLR*ACVNYSFPEKEVI	0	10	0	0	0	0		0	83.4962	0	0	0	0		27.8321	0		-1
TGTGGCAGTGAAAATGTTGAATGTGACAGCACCTACACCTCAAAAAAAGCTTGTGTGAATTACTCTTTTCCAGAGAAAGAAGTTATTTTTATTAGCTCCTGGTTCCCAGTGGACAGTGCAGGGGAAAGAAT	VAVKMLNVTAPTPQKKLV*ITLFQRKKLFLLAPGSQWTVQGKE	0	10	0	0	0	0		0	83.4962	0	0	0	0		27.8321	0		-1
TGTGGCAGTGAAAATGTTGAATGTGACAGCACCTACACCCTCAATGAAGTAGGAGTACTCAGGTGAGCTTGTGTGAATTACTCTTTTCCAGAGAAAGAAGTTATTTTTATTAGCTCCTGGTTCCCAGTGGA	VAVKMLNVTAPTPSMK*EYSGELV*ITLFQRKKLFLLAPGSQW	0	10	0	0	0	0		0	83.4962	0	0	0	0		27.8321	0		-1
TGTGGCAGTGAAAATGTTGAATGTGACAAATGAAGCCTTCAAAAATGAAGTAGGAGTACTCAGGTGAGCTTGTGTGAATTACTCTTTTCCAGAGAAAGAAGTTATTTTTATTAGCTCCTGGTTCCCAGTGG	VAVKMLNVTNEAFKNEVGVLR*ACVNYSFPEKEVIFISSWFPV	0	10	0	0	0	0		0	83.4962	0	0	0	0		27.8321	0		-1
TGTGGCAGTGAAAATGTTGAATGTGACAGCACCTACACCTGTCACAAGCCTTCAAAAATGAAGTAGGAGTACTCAGGTGAGCTTGTGTGAATTACTCTTTTCCAGAGAAAGAAGTTATTTTTATTAGCTCC	VAVKMLNVTAPTPVTSLQK*SRSTQVSLCELLFSRERSYFY*L	6	0	3	2	1	0		57.7617	0	25.2821	19.5756	8.81943	0		27.6813	9.46501		2.92459
TGTGGCAGTGAAAATGTTGAATGTGACAGCACAGTAGGAGTACTCAGGTGAGCTTGTGTGAATTACTCTTTTCCAGAGAAAGAAGTTATTTTTATTAGCTCCTGGTTCCCAGTGGACAGTGCAGGGGAAAG	VAVKMLNVTAQ*EYSGELV*ITLFQRKKLFLLAPGSQWTVQGK	6	2	1	3	2	3		57.7617	16.6992	8.42737	29.3634	17.6389	27.0568		27.6294	24.6863		1.11922
TGTGGCAGTGAAAATGTTGAATGTGACAGCACCTACACCTCAGGTGAAGTAGGAGTACTCAGGTGAGCTTGTGTGAATTACTCTTTTCCAGAGAAAGAAGTTATTTTTATTAGCTCCTGGTTCCCAGTGGA	VAVKMLNVTAPTPQVK*EYSGELV*ITLFQRKKLFLLAPGSQW	6	3	0	5	0	7		57.7617	25.0488	0	48.939	0	63.1325		27.6035	37.3572		0.738909
TGTGGCAGTGAAAATGTTGAATGTGACAGCACCTACACCTGAAGTTACAAGCCTTCAAAAATGAAGTAGGAGTACTCAGGTGAGCTTGTGTGAATTACTCTTTTCCAGAGAAAGAAGTTATTTTTATTAGC	VAVKMLNVTAPTPEVTSLQK*SRSTQVSLCELLFSRERSYFY*	6	3	0	1	1	1		57.7617	25.0488	0	9.7878	8.81943	9.01892		27.6035	9.20872		2.99754
TGTGGCAGTGAAAATGTTGAATGTGACAGCACCTACACCTCAGCTTGTTACAAGCCTTCAAAAATGAAGTAGGAGTACTCAGGTGAGCTTGTGTGAATTACTCTTTTCCAGAGAAAGAAGTTATTTTTATT	VAVKMLNVTAPTPQLVTSLQK*SRSTQVSLCELLFSRERSYFY	5	0	4	6	4	13		48.1348	0	33.7095	58.7268	35.2777	117.246		27.2814	70.4168		0.387427
TGTGGCAGTGAAAATGTTGAATGTGACAGCACCTACACCTCAGGTGTAACAGTTACAAGCCTTCAAAAATGAAGTAGGAGTACTCAGGTGAGCTTGTGTGAATTACTCTTTTCCAGAGAAAGAAGTTATTT	VAVKMLNVTAPTPQV*QLQAFKNEVGVLR*ACVNYSFPEKEVI	5	2	2	2	1	16		48.1348	16.6992	16.8547	19.5756	8.81943	144.303		27.2296	57.5659		0.473016
TGTGGCAGTGAAAATGTTGAATGTGACAGCACCTACACCTCAGTTACAAGCCTTCAAAAATGAAGTAGCAGTACTCAGGTGAGCTTGTGTGAATTACTCTTTTCCAGAGAAAGAAGTTATTTTTATTAGCT	VAVKMLNVTAPTPQLQAFKNEVAVLR*ACVNYSFPEKEVIFIS	5	3	1	1	1	2		48.1348	25.0488	8.42737	9.7878	8.81943	18.0378		27.2037	12.215		2.22707
TGTGGCAGTGAAAATGTTGAATGTGACAGCACACAGTTACAAGCCTTCAAAAATGAAGTAGGAGTACTCAGGTGAGCTTGTGTGAATTACTCTTTTCCAGAGAAAGAAGTTATTTTTATTAGCTCCTGGTT	VAVKMLNVTAHSYKPSKMK*EYSGELV*ITLFQRKKLFLLAPG	5	4	0	8	3	7		48.1348	33.3985	0	78.3024	26.4583	63.1325		27.1777	55.9644		0.485626
TGTGGCAGTGAAAATGTTGAATGTGACAGCACCTACACCTCACAGTTACAAGCCTTCAAAAATGAGGTAGGAGTACTCAGGTGAGCTTGTGTGAATTACTCTTTTCCAGAGAAAGAAGTTATTTTTATTAG	VAVKMLNVTAPTPHSYKPSKMR*EYSGELV*ITLFQRKKLFLL	4	2	3	2	3	9		38.5078	16.6992	25.2821	19.5756	26.4583	81.1703		26.8297	42.4014		0.632756
TGTGGCAGTGAAAATGTTGAATGTGACAGCACCTAAACAGTTACAAGCCTTCAAAAATGAAGTAGGAGTACTCAGGTGAGCTTGTGTGAATTACTCTTTTCCAGAGAAAGAAGTTATTTTTATTAGCTCCT	VAVKMLNVTAPKQLQAFKNEVGVLR*ACVNYSFPEKEVIFISS	4	3	2	1	1	5		38.5078	25.0488	16.8547	9.7878	8.81943	45.0946		26.8038	21.2339		1.26231
TGTGGCAGTGAAAATGTTGAATGCGACAGCACCTACACAGTTACAAGCCTTCAAAAATGAAGTAGGAGTACTCAGGTGAGCTTGTGTGAATTACTCTTTTCCAGAGAAAGAAGTTATTTTTATTAGCTCCT	VAVKMLNATAPTQLQAFKNEVGVLR*ACVNYSFPEKEVIFISS	4	3	2	2	1	1		38.5078	25.0488	16.8547	19.5756	8.81943	9.01892		26.8038	12.4713		2.14924
TGTGGCAGTGAAAATGTTGAATGTGACAGCACCTACACCTTCAAAAATGAAGTAGGAGTGCTCAGGTGAGCTTGTGTGAATTACTCTTTTCCAGAGAAAGAAGTTATTTTTATTAGCTCCTGGTTCCCAGT	VAVKMLNVTAPTPSKMK*ECSGELV*ITLFQRKKLFLLAPGSQ	4	4	1	0	5	5		38.5078	33.3985	8.42737	0	44.0972	45.0946		26.7779	29.7306		0.900685
TGTGGCAGTGAAAATGTTGAATGTGACAGCACCTACACCTCAGTTCCAAGCCTTCAAAAATGAAGTAGGAGTACTCAGGTGAGCTTGTGTGAATTACTCTTTTCCAGAGAAAGAAGTTATTTTTATTAGCT	VAVKMLNVTAPTPQFQAFKNEVGVLR*ACVNYSFPEKEVIFIS	4	4	1	0	0	1		38.5078	33.3985	8.42737	0	0	9.01892		26.7779	3.00631		8.90723
TGTGGCAGTGAAAATGTTGAATGTGACAGCACCTACACCTCAGCCAGTTACAAGCCTTCAAGAATGAAGTAGGAGTACTCAGGTGAGCTTGTGTGAATTACTCTTTTCCAGAGAAAGAAGTTATTTTTATT	VAVKMLNVTAPTPQPVTSLQE*SRSTQVSLCELLFSRERSYFY	3	1	5	3	2	10		28.8809	8.34962	42.1368	29.3634	17.6389	90.1892		26.4558	45.7305		0.578515
TGTGGCAGTGAAAATGTTGAATGTGACAGCACCTACACCTCAAAAATGAAGTAGGAGTACTCAAGTGAGCTTGTGTGAATTACTCTTTTCCAGAGAAAGAAGTTATTTTTATTAGCTCCTGGTTCCCAGTG	VAVKMLNVTAPTPQK*SRSTQVSLCELLFSRERSYFY*LLVPS	3	1	5	2	4	7		28.8809	8.34962	42.1368	19.5756	35.2777	63.1325		26.4558	39.3286		0.672686
TGTGGCAGTGAAAATGTTGAAAGTGACAGCACCTACACCTCAGTTACAAGCCTTCAAAAATGAAGTAGGAGTACTCAGGTGAGCTTGTGTGAATTACTCTTTTCCAGAGAAAGAAGTTATTTTTATTAGCT	VAVKMLKVTAPTPQLQAFKNEVGVLR*ACVNYSFPEKEVIFIS	3	1	5	2	3	2		28.8809	8.34962	42.1368	19.5756	26.4583	18.0378		26.4558	21.3572		1.23873
TGTGGCAGTGAAAATGTTGAATGTGACAGGACCTACACCTCAGTTACAAGCCTTCAAAAATGAAGTAGGAGTACTCAGGTGAGCTTGTGTGAATTACTCTTTTCCAGAGAAAGAAGTTATTTTTATTAGCT	VAVKMLNVTGPTPQLQAFKNEVGVLR*ACVNYSFPEKEVIFIS	3	2	4	0	0	1		28.8809	16.6992	33.7095	0	0	9.01892		26.4299	3.00631		8.79147
TGTGGCAGTGAAAATGTTGAATGTGACAGCACCTACTCCTCAGTTACAAGCCTTCAAAAATGAAGTAGGAGTACTCAGGTGAGCTTGTGTGAATTACTCTTTTCCAGAGAAAGAAGTTATTTTTATTAGCT	VAVKMLNVTAPTPQLQAFKNEVGVLR*ACVNYSFPEKEVIFIS	3	3	3	2	1	4		28.8809	25.0488	25.2821	19.5756	8.81943	36.0757		26.4039	21.4902		1.22865
TGTGGCAGTGAAAATGTTGAATGTGACAGCCTTCAAAAATGAAGTAGGAGTACTCAGGTGAGCTTGTGTGAATTACTCTTTTCCAGAGAAAGAAGTTATTTTTATTAGCTCCTGGTCCCAGTGGACAGTGC	VAVKMLNVTAFKNEVGVLR*ACVNYSFPEKEVIFISSWSQWTV	3	3	3	0	0	2		28.8809	25.0488	25.2821	0	0	18.0378		26.4039	6.01261		4.39142
TGTGGCAGTGAAAATGTTGAATGTGACAGCACCTACACCTCAGTTACAAGCCTTCAAAAATGAAGTAGGAGTACTCAGGTGAGCTTGTGTGAATTACTCTTTTCGAGAGAAAGAAGTTATTTTTATTAGCT	VAVKMLNVTAPTPQLQAFKNEVGVLR*ACVNYSFREKEVIFIS	3	4	2	0	1	2		28.8809	33.3985	16.8547	0	8.81943	18.0378		26.378	8.95242		2.94647
TGTGGCAGTGAAAATGTTGAATGTGACAGCACCTACACCTCAGTTACAAGCCTTCAAAAATGAAGTAGGAGTACTCAGGTGAGCTTGTGTGAATTACTCTTTGCCAGAGAAAGAAGTTATTTTTATTAGCT	VAVKMLNVTAPTPQLQAFKNEVGVLR*ACVNYSLPEKEVIFIS	3	5	1	2	1	3		28.8809	41.7481	8.42737	19.5756	8.81943	27.0568		26.3521	18.4839		1.42568
TGTGGCAGTGAAAATGTTGAATGTGACAGCACCTACAATGTTACAAGCCTTCAAAAATGAAGTAGGAGTACTCAGGTGAGCTTGTGTGAATTACTCTTTTCCAGAGAAAGAAGTTATTTTTATTAGCTCCT	VAVKMLNVTAPTMLQAFKNEVGVLR*ACVNYSFPEKEVIFISS	2	0	7	0	0	0		19.2539	0	58.9916	0	0	0		26.0818	0		-1
TGTGGCAGTGAAAATGTTGAATGTGACAGCACCTACACCCCACAGTTACAAGCCTTCAAAAATGAAGTAGGAGTACTCAGGTGAGCTTGTGTGAATTACTCTTTTCCAGAGAAAGAAGTTATTTTTATTAG	VAVKMLNVTAPTPHSYKPSKMK*EYSGELV*ITLFQRKKLFLL	2	1	6	2	3	1		19.2539	8.34962	50.5642	19.5756	26.4583	9.01892		26.0559	18.3509		1.41987
TGTGGCAGTGAAAATGTTGAATGTGACAGCACCTACACCTCAGGGTTACAAGCCTTCAAAAATGAAGTAGGAGTACTCAGGTGAGCTTGTGTGAATTACTCTTTTCCAGAGAAAGAAGTTATTTTTATTAG	VAVKMLNVTAPTPQGYKPSKMK*EYSGELV*ITLFQRKKLFLL	2	2	5	9	2	12		19.2539	16.6992	42.1368	88.0902	17.6389	108.227		26.03	71.3187		0.364981
TGTGGCAGTGAAAATGTTGAATGTGACAGCACCTACACCTCAGTTACAACCCTTCAAAAATGAAGTAGGAGTACTCAGGTGAGCTTGTGTGAATTACTCTTTTCCAGAGAAAGAAGTTATTTTTATTAGCT	VAVKMLNVTAPTPQLQPFKNEVGVLR*ACVNYSFPEKEVIFIS	2	2	5	0	1	1		19.2539	16.6992	42.1368	0	8.81943	9.01892		26.03	5.94612		4.37765
TGTGGCAGTGAAAATGTTGAATGTGACAGCACCTACACCTCAGTTACAAGCCTTCAAAAATGAAGTAGGAGTACTCAGGTGAGCTTGTGTGAATTACTCTTGTCCAGAGAAAGAAGTTATTTTTATTAGCT	VAVKMLNVTAPTPQLQAFKNEVGVLR*ACVNYSCPEKEVIFIS	2	3	4	0	1	1		19.2539	25.0488	33.7095	0	8.81943	9.01892		26.0041	5.94612		4.37329
TGTGGCAGTGAAAATGTTGAATGTGACAGCACCTACACCTCCAGTTACAAGCCTTCAAAAATGAAGTAGGAGTACTCAGGTGAGCTTGTGTGAATTACCCTTTTCCAGAGAAAGAAGTTATTTTTATTAGC	VAVKMLNVTAPTPPVTSLQK*SRSTQVSLCELPFSRERSYFY*	2	4	3	2	4	7		19.2539	33.3985	25.2821	19.5756	35.2777	63.1325		25.9782	39.3286		0.660541
TGTGGCAGTGAAAATGTTGAATGTGACAGCACCTACCCCTCAGTTACAAGCCTTCAAAAATGAAGTAGGAGTACTCAGGTGAGCTTGTGTGAATTACTCTTTTCCAGAGAAAGAAGTTATTTTTATTAGCT	VAVKMLNVTAPTPQLQAFKNEVGVLR*ACVNYSFPEKEVIFIS	2	5	2	2	0	1		19.2539	41.7481	16.8547	19.5756	0	9.01892		25.9522	9.53151		2.72278
TGTGGCAGTGAAAAAGTTGAATGTGACAGCACCTACACCTCAGTTACAAGCCTTCAAAAATGAAGTAGGAGTACTCAGGTGAGCTTGTGTGAATTACTCTTTTCCAGAGAAAGAAGTTATTTTTATTAGCT	VAVKKLNVTAPTPQLQAFKNEVGVLR*ACVNYSFPEKEVIFIS	2	5	2	0	1	2		19.2539	41.7481	16.8547	0	8.81943	18.0378		25.9522	8.95242		2.89891
TGTCGCAGTGAAAATGTTGAATGTGACAGCACCTACACCTCAGTTACAAGCCTTCAAAAATGAAGTAGGAGTACTCAGGTGAGCTTGTGTGAATTACTCTTTTCCAGAGAAAGAAGTTATTTTTATTAGCT	VAVKMLNVTAPTPQLQAFKNEVGVLR*ACVNYSFPEKEVIFIS	2	6	1	1	0	2		19.2539	50.0977	8.42737	9.7878	0	18.0378		25.9263	9.27521		2.79523
TGTGGCAGTGAAAATGTTACAAGCCTTCAAAAATGAAGTAGGAGTACTCAGGTGAGCTTGTGTGAATTACTCTTTTCCAGAGAAAGAAGTTATTTTTATTAGCTCCTGGTTCCCAGTGGACAGTGCAGGGA	VAVKMLQAFKNEVGVLR*ACVNYSFPEKEVIFISSWFPVDSAG	2	6	1	0	1	2		19.2539	50.0977	8.42737	0	8.81943	18.0378		25.9263	8.95242		2.89601
TGTGGCAGTGAAAATGTTGAATGTGACAGCACCTACAGTACTCAGGTGAGCTTGTGTGAATTACTCTTTTCCAGAGAAAGAAGTTATTTTTATTAGCTCCTGGTTCCCAGTGGACAGTGCAGGGGAAAGAA	VAVKMLNVTAPTVLR*ACVNYSFPEKEVIFISSWFPVDSAGER	1	0	8	0	2	6		9.62696	0	67.4189	0	17.6389	54.1135		25.682	23.9175		1.07377
TGTGGCAGTGAAAATGTTGAATGTGACAGCACCTACAGGTGAGCTTGTGTGAATTACTCTTTTCCAGAGAAAGAAGTTATTTTTATTAGCTCCTGGTTCCCAGTGGACAGTGCAGGGGAAAGAATAGTAGA	VAVKMLNVTAPTGELV*ITLFQRKKLFLLAPGSQWTVQGKE**	8	0	0	0	5	20		77.0156	0	0	0	44.0972	180.378		25.6719	74.8252		0.343091
TGTGGCAGTGAAAATGTTGAATGTGACAGCACCGCCTTCAAAAATGAAGTAGGAGTACTCAGGTGAGCTTGTGTGAATTACTCTTTTCCAGAGAAAGAAGTTATTTTTATTAGCTCCTGGTTCCCAGTGGA	VAVKMLNVTAPPSKMK*EYSGELV*ITLFQRKKLFLLAPGSQW	8	0	0	1	6	14		77.0156	0	0	9.7878	52.9166	126.265		25.6719	62.9898		0.407556
TGTGGCAGTGAAAATGTTGAATGTGACAGCACCTACACCTCAAAATGAAGTACAAGCCTTCAAAAATGAAGTAGGAGTACTCAGGTGAGCTTGTGTGAATTACTCTTTTCCAGAGAAAGAAGTTATTTTTA	VAVKMLNVTAPTPQNEVQAFKNEVGVLR*ACVNYSFPEKEVIF	8	0	0	0	2	7		77.0156	0	0	0	17.6389	63.1325		25.6719	26.9238		0.953502
TGTGGCAGTGAAAATGTTGAATGTGACAGCACCTACAGAGAAAGAAGTTATTTTTATTAGCTCCTGGTTCCCAGTGGACAGTGCAGGGGAAAGAATAGTAGAAGATCGGAAGAGCACACGTCTGAACTCCA	VAVKMLNVTAPTEKEVIFISSWFPVDSAGERIVEDRKSTRLNS	8	0	0	2	0	6		77.0156	0	0	19.5756	0	54.1135		25.6719	24.563		1.04514
TGTGGCAGTGAAAATGTTGAATGTGACAGCACCTACACCTTTTTTGAAGTTACAAGCCTTCAAAAATGAAGTAGGAGTACTCAGGTGAGCTTGTGTGAATTACTCTTTTCCAGAGAAAGAAGTTATTTTTA	VAVKMLNVTAPTPFLKLQAFKNEVGVLR*ACVNYSFPEKEVIF	8	0	0	0	0	6		77.0156	0	0	0	0	54.1135		25.6719	18.0378		1.42322
TGTGGCAGTGAAAATGTTGAATGTGACAGCACCTACACCTCAAAATAAGCCTTCAAAAATGAAGTAGGAGTACTCAGGTGAGCTTGTGTGAATTACTCTTTTCCAGAGAAAGAAGTTATTTTTATTAGCTC	VAVKMLNVTAPTPQNKPSKMK*EYSGELV*ITLFQRKKLFLLA	8	0	0	0	0	0		77.0156	0	0	0	0	0		25.6719	0		-1
TGTGGCAGTGAAAATGTTGAATGTGACAGCACCTACACCTCAGCCTTCATTCAAAAATGAAGTAGGAGTACTCAGGTGAGCTTGTGTGAATTACTCTTTTCCAGAGAAAGAAGTTATTTTTATTAGCTCCT	VAVKMLNVTAPTPQPSFKNEVGVLR*ACVNYSFPEKEVIFISS	8	0	0	0	0	0		77.0156	0	0	0	0	0		25.6719	0		-1
TGTGGCAGTGAAAATGTTGAATGTGACAGCACATATATACCCTTTTACTCTTTTATTCTAAAAAGCTCCTGGTTCCCAGTGGACAGTGCAGGGGAAAGAATAGTAGAAGATCGGAAGAGCACACGTCTGAA	VAVKMLNVTAHIYPFTLLF*KAPGSQWTVQGKE**KIGRAHV*	8	0	0	0	0	0		77.0156	0	0	0	0	0		25.6719	0		-1
TGTGGCAGTGAAAATGTTGAATGTGACAGCACCTACACCTACACCTACACCTCAGTAGGTGTAGCCTTCAAAAATGAAGTAGGAGTACTCAGGTGAGCTTGTGTGAATTACTCTTTTCCAGAGAAAGAAGT	VAVKMLNVTAPTPTPTPQ*V*PSKMK*EYSGELV*ITLFQRKK	8	0	0	0	0	0		77.0156	0	0	0	0	0		25.6719	0		-1
TGTGGCAGTGAAAATGTTGAATGTGACAGCACCTACACCTCTTCAAAAATGAAGTAGGAGTACTCAGGTGAGCTTGTGTGAATTACTCTTTTCCAGAGAAAGAAGTTATTCTTATTAGCTCCTGGTTCCCA	VAVKMLNVTAPTPLQK*SRSTQVSLCELLFSRERSYSY*LLVP	8	0	0	0	0	0		77.0156	0	0	0	0	0		25.6719	0		-1
TGTGGCAGTGAAAATGTTGAATGTGACAGCACCTACACCTCAAAAAAATTTTGAAGGTTACAAGCCTTCAAAAATGAAGTAGGAGTACTCAGGTGAGCTTGTGTGAATTACTCTTTTCCAGAGAAAGAAGT	VAVKMLNVTAPTPQKNFEGYKPSKMK*EYSGELV*ITLFQRKK	8	0	0	0	0	0		77.0156	0	0	0	0	0		25.6719	0		-1
TGTGGCAGTGAAAATGTTGAATGTGACAGCACCTACACCTCAGAATTCACAGTTACAAGCCTTCAAAAATGAAGTAGGAGTACTCAGGTGAGCTTGTGTGAATTACTCTTTTCCAGAGAAAGAAGTTATTT	VAVKMLNVTAPTPQNSQLQAFKNEVGVLR*ACVNYSFPEKEVI	8	0	0	0	0	0		77.0156	0	0	0	0	0		25.6719	0		-1
TGTGGCAGTGAAAATGTTGAATGTAACAAGCCTTCAAAAATGAAGTAGGAGTACTCAGGTGAGCTTGTGTGAATTACTCTTTTCCAGAGAAAGAAGTTATTTTTATTAGCTCCTGGTTCCCAGTGGACAGT	VAVKMLNVTSLQK*SRSTQVSLCELLFSRERSYFY*LLVPSGQ	1	1	7	4	2	2		9.62696	8.34962	58.9916	39.1512	17.6389	18.0378		25.6561	24.9426		1.0286
TGTGGCAGTGAAAATGTTGAATGTGACAGCACCTACACCTCAAGCCTTCAAAAATGAAATAGGAGTACTCAGGTGAGCTTGTGTGAATTACTCTTTTCCAGAGAAAGAAGTTATTTTTATTAGCTCCTGGT	VAVKMLNVTAPTPQAFKNEIGVLR*ACVNYSFPEKEVIFISSW	1	1	7	0	5	2		9.62696	8.34962	58.9916	0	44.0972	18.0378		25.6561	20.7117		1.23872
TGTGGCAGTGAAAATGTTGAATGTGACAGCACACAAGCCTTCAAAAATGAAGTAGGAGTACTCAGGTGAGCTTGTGTGAATTACTCTTTTCCAGAGAAAGAAGTTATTTTTATTAGCTCCTGGTTCCCAGT	VAVKMLNVTAHKPSKMK*EYSGELV*ITLFQRKKLFLLAPGSQ	1	2	6	1	5	5		9.62696	16.6992	50.5642	9.7878	44.0972	45.0946		25.6301	32.9932		0.776831
TGTGGCAGTGAAAATGTTGAATGTGACAGCACCTACACCTCAAAAATGAAGTAGGAGTGCTCAGGTGAGCTTGTGTGAATTACTCTTTTCCAGAGAAAGAAGTTATTTTTATTAGCTCCTGGTTCCCAGTG	VAVKMLNVTAPTPQK*SRSAQVSLCELLFSRERSYFY*LLVPS	1	3	5	0	3	5		9.62696	25.0488	42.1368	0	26.4583	45.0946		25.6042	23.851		1.07351
TGTGGCAGTGAAAATGTTGAATGTGACAGCACCTACAAGCCTTCAAAAATGAAGTAGAAGTACTCAGGTGAGCTTGTGTGAATTACTCTTTTCCAGAGAAAGAAGTTATTTTTATTAGCTCCTGGTTCCCA	VAVKMLNVTAPTSLQK*SRSTQVSLCELLFSRERSYFY*LLVP	1	4	4	3	3	9		9.62696	33.3985	33.7095	29.3634	26.4583	81.1703		25.5783	45.664		0.560141
TGTGGCAGTGAAAATGTTGAATGTGACAGCACCTACACCTCAGGCTGAGGTTACAAGCCTTCAAAAATGAAGTAGGAGTACTCAGGTGAGCTTGTGTGAATTACTCTTTTCCAGAGAAAGAAGTTATTTTT	VAVKMLNVTAPTPQAEVTSLQK*SRSTQVSLCELLFSRERSYF	1	8	0	0	2	0		9.62696	66.7969	0	0	17.6389	0		25.4746	5.87962		4.3327
TGTGCAGTTACAAGCCTTCAAAAATGAAGTAGGAGTACTCAGGTGAGCTTGTGTGAATTACTCTTTTCCAGAGAAAGAAGTTATTTTTATTAGCTCCTGGTTCCCAGTGGACAGTGCAGGGGAAAGAATAG	VQLQAFKNEVGVLR*ACVNYSFPEKEVIFISSWFPVDSAGERI	0	0	9	1	0	9		0	0	75.8463	9.7878	0	81.1703		25.2821	30.3194		0.83386
TGTGGCAGTGAAAATGTTGAATGTGACAGCACCAGTAGGAGTACTCAGGTGAGCTTGTGTGAATTACTCTTTTCCAGAGAAAGAAGTTATTTTTATTAGCTCCTGGTTCCCAGTGGACAGTGCAGGGGAAA	VAVKMLNVTAPVGVLR*ACVNYSFPEKEVIFISSWFPVDSAGE	0	0	9	1	2	5		0	0	75.8463	9.7878	17.6389	45.0946		25.2821	24.1738		1.04585
TGTGGCAGTGAAAATGTTGAATGTGACAGCACCTTTCAAAAATGAAGTAGGAGTACTCAGGTGAGCTTGTGTGAATTACTCTTTTCCAGAGAAAGAAGTTATTTTTATTAGCTCCTGGTTCCCAGTGGACA	VAVKMLNVTAPFKNEVGVLR*ACVNYSFPEKEVIFISSWFPVD	0	0	9	2	0	1		0	0	75.8463	19.5756	0	9.01892		25.2821	9.53151		2.65248
TGTGGCAGTGAAAAGAATACTTCAAAAATGAAGTAGGAGTACTCAGGTGAGCTTGTGTGAATTACTCTTTTCCAGAGAAAGAAGTTATTTTTATTAGCTCCTGGTTCCCAGTGGACAGTGCAGGGGAAAGA	VAVKRILQK*SRSTQVSLCELLFSRERSYFY*LLVPSGQCRGK	0	0	9	0	0	1		0	0	75.8463	0	0	9.01892		25.2821	3.00631		8.40969
TGTGGCAGTGAAAATGTTGAATGTGACAGCACCTACACCTCAGCATATACAAGCCTTCAAAAATGAAGTAGGAGTACTCAGGTGAGCTTGTGTGAATTACTCTTTTCCAGAGAAAGAAGTTATTTTTATTA	VAVKMLNVTAPTPQHIQAFKNEVGVLR*ACVNYSFPEKEVIFI	0	0	9	0	0	0		0	0	75.8463	0	0	0		25.2821	0		-1
TGTGGCAGTGAAAATGTTGAATGTGACAGCACCTACACCTCAGAGACAAGCCTTCAAAAATGAAGTAGGAGTACTCAGGTGAGCTTGTGTGAATTACTCTTTTCCAGAGAAAGAAGTTATTTTTATTAGCT	VAVKMLNVTAPTPQRQAFKNEVGVLR*ACVNYSFPEKEVIFIS	0	0	9	0	0	0		0	0	75.8463	0	0	0		25.2821	0		-1
TGTGGCAGTGAAAATGTTGAATGTGACAGCACCTACACCTCAAAATTAAGCCTTCAAAAATGAAGTAGGAGTACTCAGGTGAGCTTGTGTGAATTACTCTTTTCCAGAGAAAGAAGTTATTTTTATTAGCT	VAVKMLNVTAPTPQN*AFKNEVGVLR*ACVNYSFPEKEVIFIS	0	0	9	0	0	0		0	0	75.8463	0	0	0		25.2821	0		-1
TGTGGCAGTGAAAATGTTGAATGTGACAGCACCTACACCCCAGAAGTAGGAGTACTCAGGTGAGCTTGTGTGAATTACTCTTTTCCAGAGAAAGAAGTTATTTTTATTAGCTCCTGGTTCCCAGTGGACAG	VAVKMLNVTAPTPQK*EYSGELV*ITLFQRKKLFLLAPGSQWT	0	0	9	0	0	0		0	0	75.8463	0	0	0		25.2821	0		-1
TGTGGCAGTGAAAATGTTGAATGTGACAGCACCTACACTGTCTACACTGTAACCTACAGTTACAAGCCTTCAAAATGAACTACACTGTAACCTACAGTTACAAGCCTTCAAAAATGAAGTAGGAGTACTCA	VAVKMLNVTAPTLSTL*PTVTSLQNELHCNLQLQAFKNEVGVL	0	0	9	0	0	0		0	0	75.8463	0	0	0		25.2821	0		-1
TGTGGCAGTGAAAATGTTGAATGTGACAGCACCTACACCTCAGTTACAAGCCTTCAAAAATGAAGTAGGAGTACTCAGGTGAGCTTTCTCTTTTCCAGAGAAAGAAGTTATTTTTATTAGCTCCTGGTTCC	VAVKMLNVTAPTPQLQAFKNEVGVLR*AFSFPEKEVIFISSWF	0	0	9	0	0	0		0	0	75.8463	0	0	0		25.2821	0		-1
TGTGGCAGTGAAAATGTTGAATGTGACAGCACCTACACCTCAGTAACAGTTACAAGCTTGTAACAGTTACAAGCCTTCAAAAATGAAGTAGGAGTACTCAGGTGAGCTTGTGTGAATTACTCTTTTCCAGA	VAVKMLNVTAPTPQ*QLQACNSYKPSKMK*EYSGELV*ITLFQ	0	0	9	0	0	0		0	0	75.8463	0	0	0		25.2821	0		-1
TGTGGCAGTGAAAATGTTGAATGTGACAGCACCTACACCTCAGCAACAAGCCTTCAAAAATGAAGTAGGAGTACTCAGGTGAGCTTGTGTGAATTACTCTTTTCCAGAGAAAGAAGTTATTTTAATTAGCT	VAVKMLNVTAPTPQQQAFKNEVGVLR*ACVNYSFPEKEVILIS	0	0	9	0	0	0		0	0	75.8463	0	0	0		25.2821	0		-1
TGTGGCAGTGAAAATGTTGAATGTGACAGCACCTACACCTCAGACCCTTCAAAAATGAAGTAGGAGTACTCAGGTGAGCTTGTGTGAATTACTCTTTTCCAGAGAAAGAAGTTATTTTTATTAGCTCCTGG	VAVKMLNVTAPTPQTLQK*SRSTQVSLCELLFSRERSYFY*LL	0	0	9	0	0	0		0	0	75.8463	0	0	0		25.2821	0		-1
TGTGGCAGTGAAAATGTTGAATGTGACAGCACCTACACAAGCTTCAAAAATGAAGTAGGAGTACTCAGGTGAGCTTGTGTGAATTACTCTTTTCCAGAGAAAGAAGTTATTTTTATTAGCTCCTGGTTCCC	VAVKMLNVTAPTQASKMK*EYSGELV*ITLFQRKKLFLLAPGS	0	0	9	0	0	0		0	0	75.8463	0	0	0		25.2821	0		-1
TGTGGCAGTGAAAATGTTGAATGTGACAGCACCTACACCTTCAAAATTACAAGCCTTCAAAAATGAAGTAGGAGTACTCAGGTGAGCTTGTGTGAATTACTCTTTTCCAGAGAAAGAAGTTATTTTTATTA	VAVKMLNVTAPTPSKLQAFKNEVGVLR*ACVNYSFPEKEVIFI	0	1	8	3	0	6		0	8.34962	67.4189	29.3634	0	54.1135		25.2562	27.8256		0.907659
TGTGGCAGTGAAAATGTTGAATGTGACAGCACCTACACCTCAGTGTAGGAGTACTCAGGTGAGCTTGTGTGAATTACTCTTTTCCAGAGAAAGAAGTTATTTTTATTAGCTCCTGGTTCCCAGTGGACAGT	VAVKMLNVTAPTPQCRSTQVSLCELLFSRERSYFY*LLVPSGQ	0	1	8	2	2	1		0	8.34962	67.4189	19.5756	17.6389	9.01892		25.2562	15.4111		1.63883
TGTGGCAGTGAAAATGTTGAATGTGACAGCACCTACACCTCAGTTGAAGTTACAAGCCTTCAAAAATGAAGTAGGAGTACTCAGGTGAGCTTGTGTGAATTACTCTTTTCCAGAGAAAGAAGTTATTTTTA	VAVKMLNVTAPTPQLKLQAFKNEVGVLR*ACVNYSFPEKEVIF	0	2	7	0	0	2		0	16.6992	58.9916	0	0	18.0378		25.2303	6.01261		4.19622
TGTGGCAGTGAAAATGTTGAATGTGACAGCACCTACACCTCCAGTTACAAGCCTTCAAAAATGAAGTAGGAGTGCTCAGGTGAGCTTGTGTGAATTACTCTTTTCCAGAGAAAGAAGTTATTTTTATTAGC	VAVKMLNVTAPTPPVTSLQK*SRSAQVSLCELLFSRERSYFY*	0	3	6	1	1	2		0	25.0488	50.5642	9.7878	8.81943	18.0378		25.2044	12.215		2.06339
TGTGGCAGTGAAAATGTTGAATGTGACAGCACCTACACAAGCCTTCAAAAATGAAGTAGGAGTGCTCAGGTGAGCTTGTGTGAATTACTCTTTTCCAGAGAAAGAAGTTATTTTTATTAGCTCCTGGTTCC	VAVKMLNVTAPTQAFKNEVGVLR*ACVNYSFPEKEVIFISSWF	0	6	3	0	1	2		0	50.0977	25.2821	0	8.81943	18.0378		25.1266	8.95242		2.80668
TGTGGCAGTGAAAAGTTACAAGCCTTCAAAAATGAAGTAGGAGTACTCAGGTGAGCTTGTGTGAATTACTCTTTTCCAGAGAAAGAAGTTATTTTTATTAGCTCCTGGTTCCCAGTGGACAGTGCAGGGGA	VAVKSYKPSKMK*EYSGELV*ITLFQRKKLFLLAPGSQWTVQG	0	7	2	3	2	8		0	58.4473	16.8547	29.3634	17.6389	72.1514		25.1007	39.7179		0.631974
TGTGGCAGTGAAAATGTTGAATGTGACAGCACCTACACCTCAGTAGCAGTTACAAGCCTTCAAAAATGAAGTAGGAGTACTCAGGTGAGCTTGTGTGAATTACTCTTTTCCAGAGAAAGAAGTTATTTTTA	VAVKMLNVTAPTPQ*QLQAFKNEVGVLR*ACVNYSFPEKEVIF	0	9	0	0	3	0		0	75.1465	0	0	26.4583	0		25.0488	8.81943		2.84019
TGTGGCAGTGAAAATGTTGAATGTGACAGCACCTACACGTCAGTTACAAGCCTTCAAAAATGAAGTAGGAGTACTCAGGTGAGCTTGTGTGAATTACTCTTTTCCAGAGAAAGAAGTTATTTTTATTAGCT	VAVKMLNVTAPTRQLQAFKNEVGVLR*ACVNYSFPEKEVIFIS	0	9	0	0	0	2		0	75.1465	0	0	0	18.0378		25.0488	6.01261		4.16605
TGTGGCAGTGAAAATGTTGAATGTGACAGCACCTACACCTCATAAGTAGGAGTACTCAGGTGAGCTTGTGTGAATTACTCTTTTCCAGAGAAAGAAGTTATTTTTATTAGCTCCTGGTTCCCAGTGGACAG	VAVKMLNVTAPTPHK*EYSGELV*ITLFQRKKLFLLAPGSQWT	0	9	0	0	2	0		0	75.1465	0	0	17.6389	0		25.0488	5.87962		4.26028
TGTGGCAGTGAAAATGTTGAATGTGACAGCACCTACACCTCAGGTTACTGAAGGTTACAAGCCTTCAAAAATGAAGTAGGAGTACTCAGGTGAGCTTGTGTGAATTACTCTTTTCCAGAGAAAGAAGTTAT	VAVKMLNVTAPTPQVTEGYKPSKMK*EYSGELV*ITLFQRKKL	0	9	0	0	0	0		0	75.1465	0	0	0	0		25.0488	0		-1
TGTGGCAGTGAAAATGTTGAATGTGACAGCACCTACACCTCAGGCACTTACAAGCCTTCAAAAATGAAGTAGGAGTACTCAGGTGAGCTTGTGTGAATTACTCTTTTCCAGAGAAAGAAGTTATTTTTATT	VAVKMLNVTAPTPQALTSLQK*SRSTQVSLCELLFSRERSYFY	0	9	0	0	0	0		0	75.1465	0	0	0	0		25.0488	0		-1
TGTGGCAGTGAAAATGTTGAATGTGACAGCACCTACACCTCAGTTACAGTTACAGTTACAAGCCTTCAAAAATGAAGTAGGAGTACTCAGGTGAGCTTGTGTGAATTACTCTTTTCCAGAGAAAGAAGTTA	VAVKMLNVTAPTPQLQLQLQAFKNEVGVLR*ACVNYSFPEKEV	0	9	0	0	0	0		0	75.1465	0	0	0	0		25.0488	0		-1
TGTGGCAGTGAAAATGTTGAATGTGACAGCACCTACACCTCAGTAACTGGCCTTCAAAAATGAAGTAGGAGTACTCAGGTGAGCTTGTGTGAATTACTCTTTTCCAGAGAAAGAAGTTATTTTTATTAGCT	VAVKMLNVTAPTPQ*LAFKNEVGVLR*ACVNYSFPEKEVIFIS	0	9	0	0	0	0		0	75.1465	0	0	0	0		25.0488	0		-1
TGTGGCAGTGAAAATGTTGAATGTGACAGCACCTACACCCTTCAAGCCTTCAAAAATGAAGTAGGAGTACTCAGGTGAGCTTGTGTGAATTACTCTTTTCCAGAGAAAGAAGTTATTTTTATTAGCTCCTG	VAVKMLNVTAPTPFKPSKMK*EYSGELV*ITLFQRKKLFLLAP	0	9	0	0	0	0		0	75.1465	0	0	0	0		25.0488	0		-1
TGTGGCAGTGAAAATGTTGAATGTGACAGCACCTACAAACCAGTTACAACAAGCCTTCAAAAATGAAGTAGGAGTACTCAGGTGAGCTTGTGTGAATTACTCTTTTCCAGAGAAAGAAGTTATTTTTATTA	VAVKMLNVTAPTNQLQQAFKNEVGVLR*ACVNYSFPEKEVIFI	0	9	0	0	0	0		0	75.1465	0	0	0	0		25.0488	0		-1
TGTGGCAGTGAAAATGTTGAATGTGACAGCACACTCTGGAAAAGAGTTACAAGCCTTCAAAAATGAAGTAGGAGTACTCAGGTGAGCTTGTGTGAATTACTCTTTTCCAGAGAAAGAAGTTATTTTTATTA	VAVKMLNVTAHSGKELQAFKNEVGVLR*ACVNYSFPEKEVIFI	0	9	0	0	0	0		0	75.1465	0	0	0	0		25.0488	0		-1
TGTGGCAGTGAAAATGTTGAATGTGACAGCACACACAGCCTTCAAAAATGAAGTAGGAGTACTCAGGTGAGCTTGTGTGAATTACTCTTTTCCAGAGAAAGAAGTTATTTTTATTAGCTCCTGGTTCCCAG	VAVKMLNVTAHTAFKNEVGVLR*ACVNYSFPEKEVIFISSWFP	0	9	0	0	0	0		0	75.1465	0	0	0	0		25.0488	0		-1
TGTGGCAGTGAAAATGTTGAATGTGACAGCACCTACATTTACAAGCCTTCAAAAATGAAGTAGGAGTACTCAGGTGAGCTTGTGTGAATTACTCTTTTCCAGAGAAAGAAGTTATTTTTATTAGCTCCTGG	VAVKMLNVTAPTFTSLQK*SRSTQVSLCELLFSRERSYFY*LL	6	1	1	3	0	4		57.7617	8.34962	8.42737	29.3634	0	36.0757		24.8462	21.813		1.13905
TGTGGCAGTGAAAATGTTGAATGTGACAGCACCTACACCTCACAAGCCTTCAAAATGAAGTAGGAGTACTCAGGTGAGCTTGTGTGAATTACTCTTTTCCAGAGAAAGAAGTTATTTTTATTAGCTCCTGG	VAVKMLNVTAPTPHKPSK*SRSTQVSLCELLFSRERSYFY*LL	6	2	0	0	0	0		57.7617	16.6992	0	0	0	0		24.8203	0		-1
TGTGGCAGTGAAAATGTTGAATGTGACAGCACCTACACCTCAGCAGTTACAAGCCTTCAAAAATGAAGTAGGAGTACTCAGGTGAGCTTGTGTGAATTACTCTTTCCCAGAGAAAGAAGTTATTTTTATTA	VAVKMLNVTAPTPQQLQAFKNEVGVLR*ACVNYSFPEKEVIFI	5	0	3	29	29	5		48.1348	0	25.2821	283.846	255.763	45.0946		24.4723	194.901		0.125562
TGTGGCAGTGAAAATGTGGCAGTTACAAGCCTTCAAAAATGAAGTAGGAGTACTCAGGTGAGCTTGTGTGAATTACTCTTTTCCAGAGAAAGAAGTTATTTTTATTAGCTCCTGGTTCCCAGTGGACAGTG	VAVKMWQLQAFKNEVGVLR*ACVNYSFPEKEVIFISSWFPVDS	5	1	2	0	5	10		48.1348	8.34962	16.8547	0	44.0972	90.1892		24.4464	44.7621		0.54614
TGTGGCAGTGAAAATGTTGAATGTGACAGCACCTCCAGTTACAAGCCTTCAAAAATGAAGTAGGAGTACTCAGGTGAGCTTGTGTGAATTACTCTTTTCCAGAGAAAGAAGTTATTTTTATTAGCTCCTGG	VAVKMLNVTAPPVTSLQK*SRSTQVSLCELLFSRERSYFY*LL	5	2	1	3	1	9		48.1348	16.6992	8.42737	29.3634	8.81943	81.1703		24.4205	39.7844		0.61382
TGTGGCAGTGAAAATGTTGAATGTGAAGCACCTACAAGCCTTCAAAAATGAAGTAGGAGTACTCAGGTGAGCTTGTGTGAATTACTCTTTTCCAGAGAAAGAAGTTATTTTTATTAGCTCCTGGTTCCCAG	VAVKMLNVKHLQAFKNEVGVLR*ACVNYSFPEKEVIFISSWFP	5	3	0	0	0	0		48.1348	25.0488	0	0	0	0		24.3945	0		-1
TGTGGCAGTGAAAATGTTGAATGTGACAGCACCTACACCTCAGTTACAAGCCTTCAAAAATGAAGTAGGAGTACTCAGGTGAGCTTGTGTGAATTACTCTTTTCCAGAGAAAGAAGTTATTTTTTTAGCTC	VAVKMLNVTAPTPQLQAFKNEVGVLR*ACVNYSFPEKEVIFLA	4	1	3	0	0	2		38.5078	8.34962	25.2821	0	0	18.0378		24.0465	6.01261		3.99934
TGTGGCAGTGAAAATGTTGAATGTGACAGCACCTGCAGTTACAAGCCTTCAAAAATGAAGTAGGAGTACTCAGGTGAGCTTGTGTGAATTACTCTTTTCCAGAGAAAGAAGTTATTTTTATTAGCTCCTGG	VAVKMLNVTAPAVTSLQK*SRSTQVSLCELLFSRERSYFY*LL	4	4	0	6	7	8		38.5078	33.3985	0	58.7268	61.736	72.1514		23.9688	64.2047		0.373318
TGTGGCAGTGAAAATGTTGAATGTGACAGCACCTACACCCCAGTTACAAGCCTTCAAGAATGAAGTAGGAGTACTCAGGTGAGCTTGTGTGAATTACTCTTTTCCAGAGAAAGAAGTTATTTTTATTAGCT	VAVKMLNVTAPTPQLQAFKNEVGVLR*ACVNYSFPEKEVIFIS	4	4	0	0	1	0		38.5078	33.3985	0	0	8.81943	0		23.9688	2.93981		8.15317
TGTGGCAGTGAAAATGTTGAATGTGACAGCACCTGCACCTCCAGTTACAAGCCTTCAAAAATGAAGTAGGAGTACTCAGGTGAGCTTGTGTGAATTACTCTTTTCCAGAGAAAGAAGTTATTTTTATTAGC	VAVKMLNVTAPAPPVTSLQK*SRSTQVSLCELLFSRERSYFY*	3	0	5	2	2	6		28.8809	0	42.1368	19.5756	17.6389	54.1135		23.6726	30.4427		0.777612
TGTGGCAGTGAAAATGTTGAATGTGACAGCACCTACACCTCAGCAAGTACAAGCCTTCAAAAATGAAGTAGGAGTACTCAGGTGAGCTTGTGTGAATTACTCTTTTCCAGAGAAAGAAGTTATTTTTATTA	VAVKMLNVTAPTPQQVQAFKNEVGVLR*ACVNYSFPEKEVIFI	3	0	5	0	4	1		28.8809	0	42.1368	0	35.2777	9.01892		23.6726	14.7655		1.60323
TGTGGCAGTGAAAATGTTGAATGTGACAGCACCTACACCTCATACAAGCCTTCAAAAATGAAGTAGGAGTACTCAGGTGAGCTTGTGTGAATTACTCTTTTCCAGAGAAAGAAGTTATTTTTATTAGCTCC	VAVKMLNVTAPTPHTSLQK*SRSTQVSLCELLFSRERSYFY*L	3	1	4	11	2	19		28.8809	8.34962	33.7095	107.666	17.6389	171.36		23.6467	98.8881		0.239125
TGTGGCAGTGAAAATGTTGAATGTGACAGCACCTACACCTCAAGCCTTCAAAAATGAAGTAAGAGTACTCAGGTGAGCTTGTGTGAATTACTCTTTTCCAGAGAAAGAAGTTATTTTTATTAGCTCCTGGT	VAVKMLNVTAPTPQAFKNEVRVLR*ACVNYSFPEKEVIFISSW	3	1	4	2	4	9		28.8809	8.34962	33.7095	19.5756	35.2777	81.1703		23.6467	45.3412		0.521527
TGTGGCAGTGAAAATGTTGAATGTGACAGCACCTACACCTTCAAAATGAAGTTACAAGCCTTCAAAAATGAAGTAGGAGTACTCAGGTGAGCTTGTGTGAATTACTCTTTTCCAGAGAAAGAAGTTATTTT	VAVKMLNVTAPTPSK*SYKPSKMK*EYSGELV*ITLFQRKKLF	3	1	4	4	3	7		28.8809	8.34962	33.7095	39.1512	26.4583	63.1325		23.6467	42.914		0.551024
TGTGGCAGTGAAAATGTTGAATGTGACAGCACCTACACCTTCAAAAATGAAGTAGGAGTACTCAGGTGAGCTTGTGTGAATTACTCTTTTCCAGAGAAAGAAGTTATTTTTATTAGCTCCTGGTCCCAGTG	VAVKMLNVTAPTPSKMK*EYSGELV*ITLFQRKKLFLLAPGPS	3	3	2	6	2	7		28.8809	25.0488	16.8547	58.7268	17.6389	63.1325		23.5948	46.4994		0.507422
TGTGGCAGTGAAAATGTTGAATGTGACAGCACCTACACCTCAGTTACAAGCCTTCAAAAATGAAGTAGGAGTACTCAGGTGAGCTTGTGTGAATTACTCTTTTCCAGAGAAATCAGTTATTTTTATTAGCT	VAVKMLNVTAPTPQLQAFKNEVGVLR*ACVNYSFPEKSVIFIS	3	3	2	2	0	0		28.8809	25.0488	16.8547	19.5756	0	0		23.5948	6.5252		3.61595
TGTGGCAGTGAAAATGTTGAATGTGACAGCACCTACACCTCAGCAAAATGAAGTAGGAGTACTCAGGTGAGCTTGTGTGAATTACTCTTTTCCAGAGAAAGAAGTTATTTTTATTAGCTCCTGGTTCCCAG	VAVKMLNVTAPTPQQNEVGVLR*ACVNYSFPEKEVIFISSWFP	3	5	0	7	7	29		28.8809	41.7481	0	68.5146	61.736	261.549		23.543	130.6		0.180268
TGTGGCAGTGAAAATGTTGAATGTGACAGCACCTACACCTCAGCCAGTTACAAGCCTTCGAAAATGAAGTAGGAGTACTCAGGTGAGCTTGTGTGAATTACTCTTTTCCAGAGAAAGAAGTTATTTTTATT	VAVKMLNVTAPTPQPVTSLRK*SRSTQVSLCELLFSRERSYFY	3	5	0	8	5	10		28.8809	41.7481	0	78.3024	44.0972	90.1892		23.543	70.8629		0.332233
TGTGGCAGTGAAAATGTTGAATGTGACAGCACCTACACCTCAGAGTACTCAGGTGAGCTTGTGTGAATTACTCTTTTCCAGAGAAAGAAGTTATTTTTATTAGCTCCTGGTTCCCAGTGGACAGTGCAGGG	VAVKMLNVTAPTPQSTQVSLCELLFSRERSYFY*LLVPSGQCR	2	0	6	0	0	6		19.2539	0	50.5642	0	0	54.1135		23.2727	18.0378		1.29022
TGTGGCAGTGAAAATGTTGAATGTGGCAGCACCTACACCTCAGCAGTTACAAGCCTTCAAAAATGAAGTAGGAGTACTCAGGTGAGCTTGTGTGAATTACTCTTTTCCAGAGAAAGAAGTTATTTTTATTA	VAVKMLNVAAPTPQQLQAFKNEVGVLR*ACVNYSFPEKEVIFI	2	2	4	71	43	14		19.2539	16.6992	33.7095	694.934	379.236	126.265		23.2209	400.145		0.0580312
TGTGGCAGTGAAAATGTTCAAAAATGAAGTAGGAGTACTCAGGTGAGCTTGTGTGAATTACTCTTTTCCAGAGAAAGAAGTTATTTTTATTAGCTCCTGGTTCCCAGTGGACAGTGCAGGGGAAAGAATAG	VAVKMFKNEVGVLR*ACVNYSFPEKEVIFISSWFPVDSAGERI	2	2	4	13	9	12		19.2539	16.6992	33.7095	127.241	79.3749	108.227		23.2209	104.948		0.221261
TGTGGCAGTGAAAATGTTGAATGTGACAGCACCTACACCCCAGTTACAAGCCTTCAAAAGTGAAGTAGGAGTACTCAGGTGAGCTTGTGTGAATTACTCTTTTCCAGAGAAAGAAGTTATTTTTATTAGCT	VAVKMLNVTAPTPQLQAFKSEVGVLR*ACVNYSFPEKEVIFIS	2	2	4	1	1	2		19.2539	16.6992	33.7095	9.7878	8.81943	18.0378		23.2209	12.215		1.90101
TGTGGCAGTGAAAATGTTGAATGTGACAGCAGCTACACCTCAGTTACAAGCCTTCAAAAATGAAGTAGGAGTACTCAGGTGAGCTTGTGTGAATTACTCTTTTCCAGAGAAAGAAGTTATTTTTATTAGCT	VAVKMLNVTAATPQLQAFKNEVGVLR*ACVNYSFPEKEVIFIS	2	2	4	1	0	0		19.2539	16.6992	33.7095	9.7878	0	0		23.2209	3.2626		7.11729
TGTGGCAGTGAAAATGTTGAATGTGACAGCACCTACACAGTTACAAGCCTTCAAAAATGAAGCAGGAGTACTCAGGTGAGCTTGTGTGAATTACTCTTTTCCAGAGAAAGAAGTTATTTTTATTAGCTCCT	VAVKMLNVTAPTQLQAFKNEAGVLR*ACVNYSFPEKEVIFISS	2	3	3	2	1	2		19.2539	25.0488	25.2821	19.5756	8.81943	18.0378		23.195	15.4776		1.49861
TGTGGCAGTGAAAATGTTGAATGTGACAGCACCTACACCTCAGTTACAAGCCTTCAAAAATGAAGTAGGAGTACTCAGGTGAGCTTTGTGAATTACTCTTTTCCAGAGAAAGAAGTTATTTTTATTAGCTC	VAVKMLNVTAPTPQLQAFKNEVGVLR*AL*ITLFQRKKLFLLA	2	3	3	1	0	3		19.2539	25.0488	25.2821	9.7878	0	27.0568		23.195	12.2815		1.88861
TGTGGCAGTGAAAATGTTGAATGTGACAGCACCTACACAGTTACAAGCCTTCAAAAATGAGGTAGGAGTACTCAGGTGAGCTTGTGTGAATTACTCTTTTCCAGAGAAAGAAGTTATTTTTATTAGCTCCT	VAVKMLNVTAPTQLQAFKNEVGVLR*ACVNYSFPEKEVIFISS	2	3	3	0	0	4		19.2539	25.0488	25.2821	0	0	36.0757		23.195	12.0252		1.92886
TGTGGCAGTGAAAATGTGGAATGTGACAGCACCTACACCTCAGTTACAAGCCTTCAAAAATGAAGTAGGAGTACTCAGGTGAGCTTGTGTGAATTACTCTTTTCCAGAGAAAGAAGTTATTTTTATTAGCT	VAVKMWNVTAPTPQLQAFKNEVGVLR*ACVNYSFPEKEVIFIS	2	3	3	0	1	0		19.2539	25.0488	25.2821	0	8.81943	0		23.195	2.93981		7.88995
TGTGGCAGTGAAAATGTTGAATGTGACAGCACCTACACCTCAGCAGTTACAAGCCTTCAAGAATGAAGTAGGAGTACTCAGGTGAGCTTGTGTGAATTACTCTTTTCCAGAGAAAGAAGTTATTTTTATTA	VAVKMLNVTAPTPQQLQAFKNEVGVLR*ACVNYSFPEKEVIFI	2	4	2	50	42	9		19.2539	33.3985	16.8547	489.39	370.416	81.1703		23.169	313.659		0.073867
TGTGGCAGTGAAAATGTTGAATGTGACAGCACCTACACCTCAGCAAAAGCCTTCAAAAATGAAGTAGGAGTACTCAGGTGAGCTTGTGTGAATTACTCTTTTCCAGAGAAAGAAGTTATTTTTATTAGCTC	VAVKMLNVTAPTPQQKPSKMK*EYSGELV*ITLFQRKKLFLLA	2	4	2	0	0	4		19.2539	33.3985	16.8547	0	0	36.0757		23.169	12.0252		1.9267
TGTGGCAGTGAAAATGTTGAATGTGACAGCACCTACACAGTTACAAGCCTTCAAAAATGAAGTAGGAGTACTCAGGTGAGCTTGTGTGAATTACTCTTCTCCAGAGAAAGAAGTTATTTTTATTAGCTCCT	VAVKMLNVTAPTQLQAFKNEVGVLR*ACVNYSSPEKEVIFISS	2	4	2	0	0	1		19.2539	33.3985	16.8547	0	0	9.01892		23.169	3.00631		7.70681
TGTGGCAGTGAAAATGTTGAATGTGACAGCACCTACACCTCAGTTACAAGCCTTCAAAAATGAAGTAGGAGTACTCAGGTGAGCTTGTGTGAATTACTCTTTTCCAGAAAGAAGTTATTTTTATTAGCTCC	VAVKMLNVTAPTPQLQAFKNEVGVLR*ACVNYSFPERSYFY*L	2	4	2	0	1	0		19.2539	33.3985	16.8547	0	8.81943	0		23.169	2.93981		7.88113
TGTGGCAGTGAAAATGTTGAATGTGACAGCACCTACAGGAGTACTCAGGTGAGCTTGTGTGAATTACTCTTTTCCAGAGAAAGAAGTTATTTTTATTAGCTCCTGGTTCCCAGTGGACAGTGCAGGGGAAA	VAVKMLNVTAPTGVLR*ACVNYSFPEKEVIFISSWFPVDSAGE	2	5	1	2	5	20		19.2539	41.7481	8.42737	19.5756	44.0972	180.378		23.1431	81.3504		0.284487
TGTGGCAGTGAAAATGTTGAATGTGACAGCACCTACACAGTTACAAGCCTTCAAAAATGAAGTAGGAGTACTCAGGTGAGCTTGTGTGAATTACTCTTTTCCAGAGAAAGAAGTTATTTTTATTAGCCCCT	VAVKMLNVTAPTQLQAFKNEVGVLR*ACVNYSFPEKEVIFISP	2	5	1	0	0	0		19.2539	41.7481	8.42737	0	0	0		23.1431	0		-1
TGTGGCAGTGAAAATGTTGAATGTGACAGCACCTACACCTCAGCAGTTACAAGCCTTCAAAAATGAAGAAGGAGTACTCAGGTGAGCTTGTGTGAATTACTCTTTTCCAGAGAAAGAAGTTATTTTTATTA	VAVKMLNVTAPTPQQLQAFKNEEGVLR*ACVNYSFPEKEVIFI	2	6	0	29	22	6		19.2539	50.0977	0	283.846	194.027	54.1135		23.1172	177.329		0.130363
TGTGGCAGTGAAAATGTTGAATGTCAGTTACAAGCCTTCAAAAATGAAGTAGGAGTACTCAGGTGAGCTTGTGTGAATTACTCTTTTCCAGAGAAAGAAGTTATTTTTATTAGCTCCTGGTTCCCAGTGGA	VAVKMLNVSYKPSKMK*EYSGELV*ITLFQRKKLFLLAPGSQW	1	0	7	4	10	10		9.62696	0	58.9916	39.1512	88.1943	90.1892		22.8728	72.5116		0.315437
TGTGGCAGTGAAAATGTTGAATGTGACAGCACCTACACCTCGCCTTCAAAAATGAAGTAGGAGTACTCAGGTGAGCTTGTGTGAATTACTCTTTTCCAGAGAAAGAAGTTATTTTTATTAGCTCCTGGTTC	VAVKMLNVTAPTPRLQK*SRSTQVSLCELLFSRERSYFY*LLV	1	0	7	4	1	12		9.62696	0	58.9916	39.1512	8.81943	108.227		22.8728	52.0659		0.439306
TGTGGCAGTGACAGTTACAAGCCTTCAAAAATGAAGTAGGAGTACTCAGGTGAGCTTGTGTGAATTACTCTTTTCCAGAGAAAGAAGTTATTTTTATTAGCTCCTGGTTCCCAGTGGACAGTGCAGGGGAA	VAVTVTSLQK*SRSTQVSLCELLFSRERSYFY*LLVPSGQCRG	1	0	7	2	0	2		9.62696	0	58.9916	19.5756	0	18.0378		22.8728	12.5378		1.82431
TGTGGCAGTGAAAATGTTGAATGTGACAGCACCTACTTTACAAGCCTTCAAAAATGAAGTAGGAGTACTCAGGTGAGCTTGTGTGAATTACTCTTTTCCAGAGAAAGAAGTTATTTTTATTAGCTCCTGGT	VAVKMLNVTAPTLQAFKNEVGVLR*ACVNYSFPEKEVIFISSW	1	0	7	2	0	1		9.62696	0	58.9916	19.5756	0	9.01892		22.8728	9.53151		2.39971
TGTGGCAGTGAAAATGTTGAATGTAACAGTTACAAGCCTTCAAAAATGAAGTAGGAGTACTCAGGTGAGCTTGTGTGAATTACTCTTTTCCAGAGAAAGAAGTTATTTTTATTAGCTCCTGGTTCCCAGTG	VAVKMLNVTVTSLQK*SRSTQVSLCELLFSRERSYFY*LLVPS	1	1	6	12	0	9		9.62696	8.34962	50.5642	117.454	0	81.1703		22.8469	66.208		0.345078
TGTGGCAGTGAAAATGTTGAATGTGACAGCACCTACACCTCAGAGTTACAAGCCTTCAAGAATGAAGTAGGAGTACTCAGGTGAGCTTGTGTGAATTACTCTTTTCCAGAGAAAGAAGTTATTTTTATTAG	VAVKMLNVTAPTPQSYKPSRMK*EYSGELV*ITLFQRKKLFLL	1	1	6	3	2	14		9.62696	8.34962	50.5642	29.3634	17.6389	126.265		22.8469	57.7557		0.395579
TGTGGCAGTGAAAATGTTGAATGTGAAGTTACAAGCCTTCAAAAATGAAGTAGGAGTACTCAGGTGAGCTTGTGTGAATTACTCTTTTCCAGAGAAAGAAGTTATTTTTATTAGCTCCTGGTTCCCAGTGG	VAVKMLNVKLQAFKNEVGVLR*ACVNYSFPEKEVIFISSWFPV	1	2	5	1	1	5		9.62696	16.6992	42.1368	9.7878	8.81943	45.0946		22.821	21.2339		1.07474
TGTGGCAGTGAAAATGTTGAATGTGACAGCACCAAATGAAGTAGGAGTACTCAGGTGAGCTTGTGTGAATTACTCTTTTCCAGAGAAAGAAGTTATTTTTATTAGCTCCTGGTTCCCAGTGGACAGTGCAG	VAVKMLNVTAPNEVGVLR*ACVNYSFPEKEVIFISSWFPVDSA	1	3	4	7	3	9		9.62696	25.0488	33.7095	68.5146	26.4583	81.1703		22.7951	58.7144		0.388237
TGTGGCAGTGAAAATGTTGAGTGTGACAGCACCTACACCTCCAGTTACAAGCCTTCAAAAATGAAGTAGGAGTACTCAGGTGAGCTTGTGTGAATTACTCTTTTCCAGAGAAAGAAGTTATTTTTATTAGC	VAVKMLSVTAPTPPVTSLQK*SRSTQVSLCELLFSRERSYFY*	1	3	4	3	2	6		9.62696	25.0488	33.7095	29.3634	17.6389	54.1135		22.7951	33.7053		0.676307
TGTGGCAGTGAAAATGTTGAATGTGACAGCACCTACACCTCAGCAAGTTACAAGCCTTCAAAGATGAAGTAGGAGTACTCAGGTGAGCTTGTGTGAATTACTCTTTTCCAGAGAAAGAAGTTATTTTTATT	VAVKMLNVTAPTPQQVTSLQR*SRSTQVSLCELLFSRERSYFY	1	3	4	2	0	3		9.62696	25.0488	33.7095	19.5756	0	27.0568		22.7951	15.5441		1.46648
TGTGGCAGTGAAAATGTTGAATGTCACAGCACCTACACCTCAGTTACAAGCCTTCAAAAATGAAGTAGGAGTACTCAGGTGAGCTTGTGTGAATTACTCTTTTCCAGAGAAAGAAGTTATTTTTATTAGCT	VAVKMLNVTAPTPQLQAFKNEVGVLR*ACVNYSFPEKEVIFIS	1	3	4	0	1	3		9.62696	25.0488	33.7095	0	8.81943	27.0568		22.7951	11.9587		1.90615
TGTGGCAGTGAAAATGTTGAATGTGGCAGCACCTACACAGTTACAAGCCTTCAAAAATGAAGTAGGAGTACTCAGGTGAGCTTGTGTGAATTACTCTTTTCCAGAGAAAGAAGTTATTTTTATTAGCTCCT	VAVKMLNVAAPTQLQAFKNEVGVLR*ACVNYSFPEKEVIFISS	1	3	4	0	0	3		9.62696	25.0488	33.7095	0	0	27.0568		22.7951	9.01892		2.52747
TGTGGCAGTGAAAATGTTGAATGTGACAGCACCTACACCTCAGTCCAGTTACAAGCCTTCAAAAATGAAGTAGGAGTACTCAGGTGAGCTTGTGTGAATTACTCTTTTCCAGAGAAAGAAGTTATTTTTAT	VAVKMLNVTAPTPQSSYKPSKMK*EYSGELV*ITLFQRKKLFL	1	4	3	1	1	3		9.62696	33.3985	25.2821	9.7878	8.81943	27.0568		22.7692	15.2213		1.49587
TGTGGCAGTGAAAATGTTGAATGTGACAGCACCTACACCTCACCTTCAAAAATGAAGTAGGAGTACTCAGGTGAGCTTGTGTGAATTACTCTTTTCCAGAGAAAGAAGTTATTTTTATTAGCTCCTGGTTC	VAVKMLNVTAPTPHLQK*SRSTQVSLCELLFSRERSYFY*LLV	0	0	8	2	10	8		0	0	67.4189	19.5756	88.1943	72.1514		22.473	59.9738		0.374714
TGTGGCAGTGAAAATGTTGCAAGCCTTCAAAAATGAAGTAGGAGTACTCAGGTGAGCTTGTGTGAATTACTCTTTTCCAGAGAAAGAAGTTATTTTTATTAGCTCCTGGTTCCCAGTGGACAGTGCAGGGG	VAVKMLQAFKNEVGVLR*ACVNYSFPEKEVIFISSWFPVDSAG	0	0	8	2	1	12		0	0	67.4189	19.5756	8.81943	108.227		22.473	45.5407		0.49347
TGTGGCAGTGAAAATGTTGAATGTGACAGCACCTACACCTCAGCAGAAGCCTTCAAAAATGAAGTAGGAGTACTCAGGTGAGCTTGTGTGAATTACTCTTTTCCAGAGAAAGAAGTTATTTTTATTAGCTC	VAVKMLNVTAPTPQQKPSKMK*EYSGELV*ITLFQRKKLFLLA	0	0	8	1	2	5		0	0	67.4189	9.7878	17.6389	45.0946		22.473	24.1738		0.929644
TGTGGCAGTGAAAATGTTGAATGTGACAGCACCTACACCTACATTTTGAAGGCTCCCAGGCTCAGATCTGGTCTAACCAGAGAGACCCAGTTACAAGCCTTCAAAAATGAAGTAGGAGTACTCAGGTGAGC	VAVKMLNVTAPTPTF*RLPGSDLV*PERPSYKPSKMK*EYSGE	0	0	8	0	0	2		0	0	67.4189	0	0	18.0378		22.473	6.01261		3.73764
TGTGGCAGTGAAAATGTTGAATGTGACAGCACCTACACCTCAGTACTCCTACTTCATTTTTGAAGGCTTGTAACAGTTACAAGCCTTCAAAAATGAAGTAGGAGTACTCAGGTGAGCTTGTGTGAATTACT	VAVKMLNVTAPTPQYSYFIFEGL*QLQAFKNEVGVLR*ACVNY	0	0	8	0	0	2		0	0	67.4189	0	0	18.0378		22.473	6.01261		3.73764
TGTGGCAGTGAAAATGTTGAATGTGACAGCACCTACACCTCAGAAATGAAAGCCTTCAAAAATGAAGTAGGAGTACTCAGGTGAGCTTGTGTGAATTACTCTTTTCCAGAGAAAGAAGTTATTTTTATTAG	VAVKMLNVTAPTPQK*KPSKMK*EYSGELV*ITLFQRKKLFLL	0	0	8	0	0	1		0	0	67.4189	0	0	9.01892		22.473	3.00631		7.47528
TGTGGCAGTGAAAATGTTGAATGTCAAGCCTTCAAAAATGAAGTAGGAGTACTCAGGTGAGCTTGTGTGAATTACTCTTTTCCAGAGAAAGAAGTTATTTTTATTAGCTCCTGGTTCCCAGTGGACAGTGC	VAVKMLNVKPSKMK*EYSGELV*ITLFQRKKLFLLAPGSQWTV	0	0	8	0	0	1		0	0	67.4189	0	0	9.01892		22.473	3.00631		7.47528
TGTGGCAGTGAAAATGTTGAATGTGACAGCACCTACACCTTCAAAAATGAAGTAACAGCCTTCAAAAATGAAGTAGGAGTACTCAGGTGAGCTTGTGTGAATTACTCTTTTCCAGAGAAAGAAGTTATTTT	VAVKMLNVTAPTPSKMK*QPSKMK*EYSGELV*ITLFQRKKLF	0	0	8	0	0	0		0	0	67.4189	0	0	0		22.473	0		-1
TGTGGCAGTGAAAATGTTGAATGTTACAAGCCTTCAAAAATGTTGAATGTGACAGCACCTACAGTTACAAGCCTTCAAAAATGAAGTAGGAGTACTCAGGTGAGCTTGTGTGAATTACTCTTTTCCAGAGA	VAVKMLNVTSLQKC*M*QHLQLQAFKNEVGVLR*ACVNYSFPE	0	0	8	0	0	0		0	0	67.4189	0	0	0		22.473	0		-1
TGTGGCAGTGAAAATGTTGAATGTGACAGCACCTTCAAGGCTTGACAGTTACAAGCCTTCAAAAATGAAGTAGGAGTACTCAGGTGAGCTTGTGTGAATTACTCTTTTCCAGAGAAAGAAGTTATTTTTAT	VAVKMLNVTAPSRLDSYKPSKMK*EYSGELV*ITLFQRKKLFL	0	0	8	0	0	0		0	0	67.4189	0	0	0		22.473	0		-1
TGTGGCAGTGAAAATGTTGAATGTGACAGCACCTACACCTGTGAATGTGTACAAGCCTTCAAAAATGAAGTAGGAGTACTCAGGTGAGCTTGTGTGAATTACTCTTTTCCAGAGAAAGAAGTTATTTTTAT	VAVKMLNVTAPTPVNVYKPSKMK*EYSGELV*ITLFQRKKLFL	0	0	8	0	0	0		0	0	67.4189	0	0	0		22.473	0		-1
TGTGGCAGTGAAAATGTTGAATGTGACAGCACCTACACCTCAGTGAATTACTCTTTTCCAGAGAAAGAAGTTATTTTTATTAGCTCCTGGTTCCCAGTGGACAGTGCAGGGGAAAGAATAGTAGAAGATCG	VAVKMLNVTAPTPQ*ITLFQRKKLFLLAPGSQWTVQGKE**KI	7	0	0	5	4	4		67.3887	0	0	48.939	35.2777	36.0757		22.4629	40.0975		0.560207
TGTGGCAGTGAAAATGTTGAATGTGACAGCACCTACACCTCAGTTTTTTATTAGCTCCTGGTTCCCAGTGGACAGTGCAGGGGAAAGAATAGTAGAAGATCGGAAGAGCACACGTCTGAACTCCAGTCACG	VAVKMLNVTAPTPQFFISSWFPVDSAGERIVEDRKSTRLNSSH	7	0	0	6	0	0		67.3887	0	0	58.7268	0	0		22.4629	19.5756		1.14749
TGTGGCAGTGAAAATGTTGAATGTGACAGCACCTACACCTCAGGCTCAGTTACAAGCCTTCAAAAATGAAGTAGGAGTACTCAGGTGAGCTTGTGTGAATTACTCTTTTCCAGAGAAAGAAGTTATTTTTA	VAVKMLNVTAPTPQAQLQAFKNEVGVLR*ACVNYSFPEKEVIF	7	0	0	2	0	2		67.3887	0	0	19.5756	0	18.0378		22.4629	12.5378		1.79161
TGTGGCAGTGAAAATGTTGAATGTGACAGCACCTACACCTCAGCATATGAAGTAGGAGTACTCAGGTGAGCTTGTGTGAATTACTCTTTTCCAGAGAAAGAAGTTATTTTTATTAGCTCCTGGTTCCCAGT	VAVKMLNVTAPTPQHMK*EYSGELV*ITLFQRKKLFLLAPGSQ	7	0	0	2	2	0		67.3887	0	0	19.5756	17.6389	0		22.4629	12.4048		1.81082
TGTGGCAGTGAAAATGTTGAACACACAGTTACAAGCCTTCAAAAATGAAGTAGGAGTACTCAGGTGAGCTTGTGTGAATTACTCTTTTCCAGAGAAAGAAGTTATTTTTATTAGCTCCTGGTTCCCAGTGG	VAVKMLNTQLQAFKNEVGVLR*ACVNYSFPEKEVIFISSWFPV	7	0	0	0	0	0		67.3887	0	0	0	0	0		22.4629	0		-1
TGTGGCAGTGAAAATGTTGAATGTGACATAACCTACAGTTACAAGCCTTCAAAAATGAAGTAGGAGTACTCAGGTGAGCTTGTGTGAATTACTCTTTTCCAGAGAAAGAAGTTATTTTTATTAGCTCCTGG	VAVKMLNVT*PTVTSLQK*SRSTQVSLCELLFSRERSYFY*LL	7	0	0	0	0	0		67.3887	0	0	0	0	0		22.4629	0		-1
TGTGGCAGTGAAAATGTTGAATGTGACAGCACCTACACCTCAGTACTCAGTACTGAGTACTCAGTACTCAGTACTGAGTAGGAGTACTCAGGTGAGCTTGTGTGAATTACTCTTTTCCAGAGAAAGAAGTT	VAVKMLNVTAPTPQYSVLSTQYSVLSRSTQVSLCELLFSRERS	7	0	0	0	0	0		67.3887	0	0	0	0	0		22.4629	0		-1
TGTGGCAGTGAAAATGTTGAATGTGACAGCACCTACACCTCAGCCTTCAAAATGAAGCCTTCAAAATGAAGCTTGTAAAAAAAATTTTACAAGCCTTCAAAAATGAAGTAGGAGTACTCAGGTGAGCTTGT	VAVKMLNVTAPTPQPSK*SLQNEACKKNFTSLQK*SRSTQVSL	7	0	0	0	0	0		67.3887	0	0	0	0	0		22.4629	0		-1
TGTGGCAGTGAAAATGTTGAAATGTGACAGTTACAAGCCTTCAAAAATGAAGTAGGAGTACTCAGGTGAGCTTGTGTGAATTACTCTTTTCCAGAGAAAGAAGTTATTTTTATTAGCTCCTGGTTCCCAGT	VAVKMLKCDSYKPSKMK*EYSGELV*ITLFQRKKLFLLAPGSQ	7	0	0	0	0	0		67.3887	0	0	0	0	0		22.4629	0		-1
TGTGGCAGTGAAAATGTTGAATGTGACAGCACCTTTTTTTTTTGACAGTTACAAGCCTTCAAAAATGAAGTAGGAGTACTCAGGTGAGCTTGTGTGAATTACTCTTTTCCAGAGAAAGAAGTTATTTTTAT	VAVKMLNVTAPFFFDSYKPSKMK*EYSGELV*ITLFQRKKLFL	7	0	0	0	0	0		67.3887	0	0	0	0	0		22.4629	0		-1
TGTGGCAGTGAAAATGTTGAATGTGACAGCACCTACACCTCAGCCTTCAAAAATGAAGTAGGAGTACTTCAGGTGAGCTTGTGTGAATTACTCTTTTCCAGAGAAAGAAGTTATTTTTATTAGCTCCTGGT	VAVKMLNVTAPTPQPSKMK*EYFR*ACVNYSFPEKEVIFISSW	7	0	0	0	0	0		67.3887	0	0	0	0	0		22.4629	0		-1
TGTGGCAGTGAAAATGTTGAATGTGACAGCACCTACACCTCAGGTGAGCTTGTGTGAATTACTCTTTTCCAGAGAAAGAAGTTATTTTTATTAGCTCCAGTTACAAGCCTTCAAAAATGAAGTAGGAGTAC	VAVKMLNVTAPTPQVSLCELLFSRERSYFY*LQLQAFKNEVGV	7	0	0	0	0	0		67.3887	0	0	0	0	0		22.4629	0		-1
TGTGGCAGTGAAAATGTTGAATGTGACAGCACCTACACCTCAGCCTTCAAAATGAAGGCTACACCTACAAGCCTTCAAAAATGAAGTAGGAGTACTCAGGTGAGCTTGTGTGAATTACTCTTTTCCAGAGA	VAVKMLNVTAPTPQPSK*RLHLQAFKNEVGVLR*ACVNYSFPE	7	0	0	0	0	0		67.3887	0	0	0	0	0		22.4629	0		-1
TGTGGCAGTGAAAATGTTGAATGTGACAGCACCTACACCACACTTTGTGTGGTGACAGTTACAAGCCTTCAAAAATGAAGTAGGAGTACTCAGGTGAGCTTGTGTGAATTACTCTTTTCCAGAGAAAGAAG	VAVKMLNVTAPTPHFVW*QLQAFKNEVGVLR*ACVNYSFPEKE	7	0	0	0	0	0		67.3887	0	0	0	0	0		22.4629	0		-1
TGTGGCAGTGAAAATGTTGAATGTGACAGCACCTACACCTCCTGGTTCCCAGTGGACAGTGCAGGGGAAAGAATAGTAGAAGATCGGAAGAGCACACGTCTGAACTCCAGTCACGGCTCAATATCTCGTAT	VAVKMLNVTAPTPPGSQWTVQGKE**KIGRAHV*TPVTAQYLV	7	0	0	0	0	0		67.3887	0	0	0	0	0		22.4629	0		-1
TGTGGCAGTGAAAATGTTGAATGTGACAGCACCTACACCTCAAAGGCTTCAAAAATGAAGTAGGAGTACTCAGGTGAGCTTGTGTGAATTACTCTTTTCCAGAGAAAGAAGTTATTTTTATTAGCTCCTGG	VAVKMLNVTAPTPQRLQK*SRSTQVSLCELLFSRERSYFY*LL	0	1	7	0	0	1		0	8.34962	58.9916	0	0	9.01892		22.4471	3.00631		7.46666
TGTGGCAGTGAAAATGTTGAATGTGACAGCACCTACACCTGCCTTCAAAAATGAAGTAGGAGTACTCAGGTGAGCTTGTGTGAATTACTCTTTTCCAGAGAAAGAAGTTATTTTTATTAGCTCCTGGTTCC	VAVKMLNVTAPTPAFKNEVGVLR*ACVNYSFPEKEVIFISSWF	0	2	6	2	0	9		0	16.6992	50.5642	19.5756	0	81.1703		22.4211	33.582		0.667654
TGTGGCAGTGAAGCCTTCAAAAATGAAGTAGGAGTACTCAGGTGAGCTTGTGTGAATTACTCTTTTCCAGAGAAAGAAGTTATTTTTATTAGCTCCTGGTTCCCAGTGGACAGTGCAGGGGAAAGAATAGT	VAVKPSKMK*EYSGELV*ITLFQRKKLFLLAPGSQWTVQGKE*	0	3	5	2	7	13		0	25.0488	42.1368	19.5756	61.736	117.246		22.3952	66.1859		0.338369
TGTGGCAGTGAAAATGTTGAATGTGACAGCACCTACACCTCAGCATTCAAAAATGAAGTAGGAGTACTCAGGTGAGCTTGTGTGAATTACTCTTTTCCAGAGAAAGAAGTTATTTTTATTAGCTCCTGGTT	VAVKMLNVTAPTPQHSKMK*EYSGELV*ITLFQRKKLFLLAPG	0	3	5	3	5	11		0	25.0488	42.1368	29.3634	44.0972	99.2081		22.3952	57.5562		0.389102
TGTGGCAGTGAAAATGTTGAATGTGACAGCACCTACACCTCAATTTTTGAAGTTACAAGCCTTCAAAAATGAAGTAGGAGTACTCAGGTGAGCTTGTGTGAATTACTCTTTTCCAGAGAAAGAAGTTATTT	VAVKMLNVTAPTPQFLKLQAFKNEVGVLR*ACVNYSFPEKEVI	0	3	5	0	0	1		0	25.0488	42.1368	0	0	9.01892		22.3952	3.00631		7.44941
TGTGGCAGTGAAAATGTTGAATGTGACAGCACCTACACCTCATTTGTTACAAGCCTTCAAAAATGAAGTAGGAGTACTCAGGTGAGCTTGTGTGAATTACTCTTTTCCAGAGAAAGAAGTTATTTTTATTA	VAVKMLNVTAPTPHLLQAFKNEVGVLR*ACVNYSFPEKEVIFI	0	3	5	0	1	0		0	25.0488	42.1368	0	8.81943	0		22.3952	2.93981		7.61792
TGTGGCAGTGAAAATGTTGAATGTGACAGCACCTACAGTTACAAGCCTTCAAAAATGAGGTAGGAGTACTCAGGTGAGCTTGTGTGAATTACTCTTTTCCAGAGAAAGAAGTTATTTTTATTAGCTCCTGG	VAVKMLNVTAPTVTSLQK*GRSTQVSLCELLFSRERSYFY*LL	0	4	4	1	2	6		0	33.3985	33.7095	9.7878	17.6389	54.1135		22.3693	27.1801		0.823004
TGTGGCAGTGAAAATGTTGAATGTGACAGCACCTACACCTCTAGTTACAAGCCTTCAAAAATGAAGTAGGAGTACTCAGGTGAGCTTGTGTGAATTACTCTTTTCCAGAGAAAGAAGTTATTTTTATTAGC	VAVKMLNVTAPTPLVTSLQK*SRSTQVSLCELLFSRERSYFY*	0	4	4	1	1	3		0	33.3985	33.7095	9.7878	8.81943	27.0568		22.3693	15.2213		1.4696
TGCGGCAGTGAAAATGTTGAATGTGACAGCACCTACACCTCAGCAGTTACAAGCCTTCAAAAATGAAGTAGGAGTACTCAGGTGAGCTTGTGTGAATTACTCTTTTCCAGAGAAAGAAGTTATTTTTATTA	AAVKMLNVTAPTPQQLQAFKNEVGVLR*ACVNYSFPEKEVIFI	0	5	3	52	69	12		0	41.7481	25.2821	508.966	608.541	108.227		22.3434	408.578		0.0546858
TGTGGCAGTGAAAATGTTGAATGTGACAGCACCTACACCTCAGTTATGAAGTAGGAGTACTCAGGTGAGCTTGTGTGAATTACTCTTTTCCAGAGAAAGAAGTTATTTTTATTAGCTCCTGGTTCCCAGTG	VAVKMLNVTAPTPQL*SRSTQVSLCELLFSRERSYFY*LLVPS	0	5	3	0	3	7		0	41.7481	25.2821	0	26.4583	63.1325		22.3434	29.8636		0.748182
TGTGGCAGTGAAAATGTTGAATGTGACAGCACCTACACCTCACCTACACCTCAGTTACAAGCCTTCAAAAATGAAGTAGGAGTACTCAGGTGAGCTTGTGTGAATTACTCTTTTCCAGAGAAAGAAGTTAT	VAVKMLNVTAPTPHLHLSYKPSKMK*EYSGELV*ITLFQRKKL	0	6	2	4	2	3		0	50.0977	16.8547	39.1512	17.6389	27.0568		22.3175	27.9489		0.798509
TGTGGCAGTGAAAATGTTGAATGTGACAGCACCTACACCTCAGCAGTTACAAGCCTTACAAGCCTTCAAAAATGAAGTAGGAGTACTCAGGTGAGCTTGTGTGAATTACTCTTTTCCAGAGAAAGAAGTTA	VAVKMLNVTAPTPQQLQALQAFKNEVGVLR*ACVNYSFPEKEV	0	6	2	0	0	1		0	50.0977	16.8547	0	0	9.01892		22.3175	3.00631		7.42355
TGTGGCAGTGAAAATGTTGAATGTGACAGCACCTACACCTCAGGAGTTACAAGCCTTCAAAAATGAAGTAGGAGTACTCAGGTGAGCTTGTGTGAATTACTCTTTTCCAGAGAAAGAAGTTATTTTTATTA	VAVKMLNVTAPTPQELQAFKNEVGVLR*ACVNYSFPEKEVIFI	0	8	0	3	2	13		0	66.7969	0	29.3634	17.6389	117.246		22.2656	54.7494		0.406683
TGTGGCAGTGAAAATGTTGAATGTGACAGCACAATGAAGTAGGAGTACTCAGGTGAGCTTGTGTGAATTACTCTTTTCCAGAGAAAGAAGTTATTTTTATTAGCTCCTGGTTCCCAGTGGACAGTGCAGGG	VAVKMLNVTAQ*SRSTQVSLCELLFSRERSYFY*LLVPSGQCR	0	8	0	0	2	2		0	66.7969	0	0	17.6389	18.0378		22.2656	11.8922		1.87228
TGTGGCAGTGAAAATGTTGAATGTGACAGCACCTACACCTCAAGCCTTCAAAATGTTACAAGCCTTCAAAAATGAAGTAGGAGTACTCAGGTGAGCTTGTGTGAATTACTCTTTTCCAGAGAAAGAAGTTA	VAVKMLNVTAPTPQAFKMLQAFKNEVGVLR*ACVNYSFPEKEV	0	8	0	0	0	3		0	66.7969	0	0	0	27.0568		22.2656	9.01892		2.46877
TGTGGCAGTGAAAATGTTGAATGTGACAGCACCTACACCTCAGCAATTCAAAAATGAAGTAGGAGTACTCAGGTGAGCTTGTGTGAATTACTCTTTTCCAGAGAAAGAAGTTATTTTTATTAGCTCCTGGT	VAVKMLNVTAPTPQQFKNEVGVLR*ACVNYSFPEKEVIFISSW	0	8	0	1	0	1		0	66.7969	0	9.7878	0	9.01892		22.2656	6.26891		3.55176
TGTGGCAGTGAAAATGTTGAATGTGACAGCACCTACACCTCCTACTTCAAAAATGAAGTAGGAGTACTCAGGTGAGCTTGTGTGAATTACTCTTTTCCAGAGAAAGAAGTTATTTTTATTAGCTCCTGGTT	VAVKMLNVTAPTPPTSKMK*EYSGELV*ITLFQRKKLFLLAPG	0	8	0	0	1	1		0	66.7969	0	0	8.81943	9.01892		22.2656	5.94612		3.74457
TGTGGCAGTGAAAATGTTGAATGTGACAGCACCTACACCTCAAAAATTCAAAAATGAAGTAGGAGTACTCAGGTGAGCTTGTGTGAATTACTCTTTTCCAGAGAAAGAAGTTATTTTTATTAGCTCCTGGT	VAVKMLNVTAPTPQKFKNEVGVLR*ACVNYSFPEKEVIFISSW	0	8	0	0	1	0		0	66.7969	0	0	8.81943	0		22.2656	2.93981		7.57384
TGTGGCAGTGAAAATTGAAGGCTTACAAGCCTTCAAAAATGAAGTAGGAGTACTCAGGTGAGCTTGTGTGAATTACTCTTTTCCAGAGAAAGAAGTTATTTTTATTAGCTCCTGGTTCCCAGTGGACAGTG	VAVKIEGLQAFKNEVGVLR*ACVNYSFPEKEVIFISSWFPVDS	0	8	0	0	0	0		0	66.7969	0	0	0	0		22.2656	0		-1
TGTGGCAGTGAAAATGTTGAATGTGACAGCACCTACACCTCAGTGCTTCAAAAATGAAGTAGGAGTACTCAGGTGAGCTTGTGTGAATTACTCTTTTCCAGAGAAAGAAGTTATTTTTATTAGCTCCTGGT	VAVKMLNVTAPTPQCFKNEVGVLR*ACVNYSFPEKEVIFISSW	0	8	0	0	0	0		0	66.7969	0	0	0	0		22.2656	0		-1
TGTGGCAGTGAAAATGTTGAATGTGACAGCACCTACACCTCAGGTAGGAGTAGGAGTACTCAGGTGAGCTTGTGTGAATTACTCTTTTCCAGAGAAAGAAGTTATTTTTATTAGCTCCTGGTTCCCAGTGG	VAVKMLNVTAPTPQVGVGVLR*ACVNYSFPEKEVIFISSWFPV	0	8	0	0	0	0		0	66.7969	0	0	0	0		22.2656	0		-1
TGTGGCAGTGAAAATGTTGAATGTGACAGCACCTACACCTCATTGTAACTGTTACAAGCCTTCAAAAATGAAGTAGGAGTACTCAGGTGAGCTTGTGTGAATTACTCTTTTCCAGAGAAAGAAGTTATTTT	VAVKMLNVTAPTPHCNCYKPSKMK*EYSGELV*ITLFQRKKLF	0	8	0	0	0	0		0	66.7969	0	0	0	0		22.2656	0		-1
TGTGGCAGTGAAAATGTTGAATGTGACAGCACCTACACCTCAGTGATTGAGCTAAGCAAGAGAGGTTCAGAAGATAGAAACAGCAAAAACCTGCTAAAAAGTTGTTAGCAGTTGTGCAAGTAAACAGAATG	VAVKMLNVTAPTPQ*LS*AREVQKIETAKTC*KVVSSCASKQN	0	8	0	0	0	0		0	66.7969	0	0	0	0		22.2656	0		-1
TGTGGCAGTGAAAATGTTGAATGTGACAGCACCTACACCTCAGAGGTGTAGTTACAAGCCTTCAAAAATGAAGTAGGAGTACTCAGGTGAGCTTGTGTGAATTACTCTTTTCCAGAGAAAGAAGTTATTTT	VAVKMLNVTAPTPQRCSYKPSKMK*EYSGELV*ITLFQRKKLF	0	8	0	0	0	0		0	66.7969	0	0	0	0		22.2656	0		-1
TGTGGCAGTGAAAATGTTGAATGTGACAGCACCTACACCTCAGAAGCACCTACAAGCCTTCAAAAATGAAGTAGGAGTACTCAGGTGAGCTTGTGTGAATTACTCTTTTCCAGAGAAAGAAGTTATTTTTA	VAVKMLNVTAPTPQKHLQAFKNEVGVLR*ACVNYSFPEKEVIF	0	8	0	0	0	0		0	66.7969	0	0	0	0		22.2656	0		-1
TGTGGCAGTGAAAATGTTGAATGTGACAGCACCTACACCTCAATTTAAGTTACAAGCCTTCAAAAATGAAGTAGGAGTACTCAGGTGAGCTTGTGTGAATTACTCTTTTCCAGAGAAAGAAGTTATTTTTA	VAVKMLNVTAPTPQFKLQAFKNEVGVLR*ACVNYSFPEKEVIF	0	8	0	0	0	0		0	66.7969	0	0	0	0		22.2656	0		-1
TGTGGCAGTGAAAATGTTGAATGTGACAGCACCTACACCTCAAAAGCCTTCAAAAATGCACCTACAAGCCTTCAAAAATGAAGTAGGAGTACTCAGGTGAGCTTGTGTGAATTACTCTTTTCCAGAGAAAG	VAVKMLNVTAPTPQKPSKMHLQAFKNEVGVLR*ACVNYSFPEK	0	8	0	0	0	0		0	66.7969	0	0	0	0		22.2656	0		-1
TGTGGCAGTGAAAATGTTGAATGTGACAGCACCTACACATTTTTTGTAACTTCAAAAATGAAGTAGGAGTACTCAGGTGAGCTTGTGTGAATTACTCTTTTCCAGAGAAAGAAGTTATTTTTATTAGCTCC	VAVKMLNVTAPTHFL*LQK*SRSTQVSLCELLFSRERSYFY*L	0	8	0	0	0	0		0	66.7969	0	0	0	0		22.2656	0		-1
TGTGGCAGATTAGCTCCTGGTTCCCAGTGGACAGTGCAGGGGAAAGAATAGTAGAAGATCGGAAGAGCACACGTCTGAACTCCAGTCACGGTCCATAATCTCGTATGCCGTCTTCTGCTTGAAAAAAAAAA	VAD*LLVPSGQCRGKNSRRSEEHTSELQSRSIISYAVFCLKKK	0	8	0	0	0	0		0	66.7969	0	0	0	0		22.2656	0		-1
TGTGGCAGTGAAAATGTTGAATGTGACAGCACCTACACCTCAAAAATGAAGTAGGAGTACTCAGATGAGCTTGTGTGAATTACTCTTTTCCAGAGAAAGAAGTTATTTTTATTAGCTCCTGGTTCCCAGTG	VAVKMLNVTAPTPQK*SRSTQMSLCELLFSRERSYFY*LLVPS	6	1	0	1	5	10		57.7617	8.34962	0	9.7878	44.0972	90.1892		22.0371	48.0247		0.45887
TGTGGCAGTGAAAATGTTGAATGTGACAGCACCTACACCTCTACAGTTACAAGCCTTCAAAAATGAAGTAGGAGTACTCAGGTGAGCTTGTGTGAATTACTCTTTTCCAGAGAAAGAAGTTATTTTTATTA	VAVKMLNVTAPTPLQLQAFKNEVGVLR*ACVNYSFPEKEVIFI	5	1	1	5	0	3		48.1348	8.34962	8.42737	48.939	0	27.0568		21.6373	25.3319		0.85415
TGTGGCAGTGAAAATGTTGAGTTACAAGCCTTCAAAAATGAAGTAGGAGTACTCAGGTGAGCTTGTGTGAATTACTCTTTTCCAGAGAAAGAAGTTATTTTTATTAGCTCCTGGTTCCCAGTGGACAGTGC	VAVKMLSYKPSKMK*EYSGELV*ITLFQRKKLFLLAPGSQWTV	4	0	3	3	6	10		38.5078	0	25.2821	29.3634	52.9166	90.1892		21.2633	57.4897		0.369863
TGTGGCAGTGAAAATGTTGAATGTGACAGCACCTACACCTCAGTTACAAGCCTTCAAAAATGAAGTAGGAGTACTCAGGTGACCTTGTGTGAATTACTCTTTTCCAGAGAAAGAAGTTATTTTTATTAGCT	VAVKMLNVTAPTPQLQAFKNEVGVLR*PCVNYSFPEKEVIFIS	4	0	3	0	0	1		38.5078	0	25.2821	0	0	9.01892		21.2633	3.00631		7.0729
TGTGGCAGTGAAAATGCTGAATGTGACAGCACCTACACCTCAGCAGTTACAAGCCTTCAAAAATGAAGTAGGAGTACTCAGGTGAGCTTGTGTGAATTACTCTTTTCCAGAGAAAGAAGTTATTTTTATTA	VAVKMLNVTAPTPQQLQAFKNEVGVLR*ACVNYSFPEKEVIFI	4	1	2	38	45	12		38.5078	8.34962	16.8547	371.936	396.874	108.227		21.2374	292.346		0.0726447
TGTGGCAGTGAAAATGTTACAAGCCTTCAAAATGAAGTAGGAGTACTCAGGTGAGCTTGTGTGAATTACTCTTTTCCAGAGAAAGAAGTTATTTTTATTAGCTCCTGGTTCCCAGTGGACAGTGCAGGGGA	VAVKMLQAFKMK*EYSGELV*ITLFQRKKLFLLAPGSQWTVQG	4	1	2	0	2	7		38.5078	8.34962	16.8547	0	17.6389	63.1325		21.2374	26.9238		0.788797
TGTGGCAGTGAAAATGTTGAATGTTGAATGTGACAGCACCTACACCTCAGTTACAAGCCTTCAAAAATGAAGTAGGAGTACTCAGGTGAGCTTGTGTGAATTACTCTTTTCCAGAGAAAGAAGTTATTTTT	VAVKMLNVECDSTYTSVTSLQK*SRSTQVSLCELLFSRERSYF	4	2	1	1	1	10		38.5078	16.6992	8.42737	9.7878	8.81943	90.1892		21.2115	36.2655		0.584894
TGTGGCAGTGAAAATGTTGAATGTGACAGCACCTACACCTCAGTTACAAGCCTTCAAAAATGAGTAGGAGTACTCAGGTGAGCTTGTGTGAATTACTCTTTTCCAGAGAAAGAAGTTATTTTTATTAGCTC	VAVKMLNVTAPTPQLQAFKNE*EYSGELV*ITLFQRKKLFLLA	4	2	1	1	0	1		38.5078	16.6992	8.42737	9.7878	0	9.01892		21.2115	6.26891		3.3836
TGTGGCAGTGAAAATGTTGAATGTGACAGCACCTGCCTTCAAAAATGAAGTAGGAGTACTCAGGTGAGCTTGTGTGAATTACTCTTTTCCAGAGAAAGAAGTTATTTTTATTAGCTCCTGGTTCCCAGTGG	VAVKMLNVTAPAFKNEVGVLR*ACVNYSFPEKEVIFISSWFPV	4	3	0	2	1	5		38.5078	25.0488	0	19.5756	8.81943	45.0946		21.1856	24.4965		0.864838
TGTGGCAGTGAAAATGTTGAATGTGACAGCACCTACACCTCAGTTACAAGTAGGAGTACTCAGGTGAGCTTGTGTGAATTACTCTTTTCCAGAGAAAGAAGTTATTTTTATTAGCTCCTGGTTCCCAGTGG	VAVKMLNVTAPTPQLQVGVLR*ACVNYSFPEKEVIFISSWFPV	4	3	0	2	3	0		38.5078	25.0488	0	19.5756	26.4583	0		21.1856	15.3446		1.38065
TGTGGCAGTGAAAATGTTGAATGTGACAGCACCTACACCTTGTACAAGCCTTCAAAAATGAAGTAGGAGTACTCAGGTGAGCTTGTGTGAATTACTCTTTTCCAGAGAAAGAAGTTATTTTTATTAGCTCC	VAVKMLNVTAPTPCTSLQK*SRSTQVSLCELLFSRERSYFY*L	3	0	4	4	2	4		28.8809	0	33.7095	39.1512	17.6389	36.0757		20.8634	30.9553		0.673987
TGTGGCAGTGAAAATGTTGAATGTGACAGCACCTACACCCCAGTTACAAGCCTTCAAAAATGAGGTAGGAGTACTCAGGTGAGCTTGTGTGAATTACTCTTTTCCAGAGAAAGAAGTTATTTTTATTAGCT	VAVKMLNVTAPTPQLQAFKNEVGVLR*ACVNYSFPEKEVIFIS	3	1	3	0	1	1		28.8809	8.34962	25.2821	0	8.81943	9.01892		20.8375	5.94612		3.50439
TGTGGCAGTGAAAATGTTGAATGTGACAGCACCTACACAGTTACAAGCCTTCAAAAATGAAGTAGGAGTACTCAGGTGAGCTCGTGTGAATTACTCTTTTCCAGAGAAAGAAGTTATTTTTATTAGCTCCT	VAVKMLNVTAPTQLQAFKNEVGVLR*ARVNYSFPEKEVIFISS	3	1	3	1	0	0		28.8809	8.34962	25.2821	9.7878	0	0		20.8375	3.2626		6.38679
TGTGGCAGTGAAAATGTTGAATGTGACAGCACCGACACCTCAGTTACAAGCCTTCAAAAATGAAGTAGGAGTACTCAGGTGAGCTTGTGTGAATTACTCTTTTCCAGAGAAAGAAGTTATTTTTATTAGCT	VAVKMLNVTAPTPQLQAFKNEVGVLR*ACVNYSFPEKEVIFIS	3	3	1	1	1	2		28.8809	25.0488	8.42737	9.7878	8.81943	18.0378		20.7857	12.215		1.70165
TGTGGCAGTGAAAATGTTGAATGTGACAGCACCTACACAGTTACAAGCCTTCAAAAATGAAGTAGGAGTACTCAGGTGAGCTTGTGTGAATTACTCTTTTCCAGAGGAAGAAGTTATTTTTATTAGCTCCT	VAVKMLNVTAPTQLQAFKNEVGVLR*ACVNYSFPEEEVIFISS	3	4	0	1	0	1		28.8809	33.3985	0	9.7878	0	9.01892		20.7598	6.26891		3.31155
TGTGGCAGTGAAAATGTTGAATGTGACAGCACCTACACCTCACAGTTACAAGCCTTCAAGAATGAAGTAGGAGTACTCAGGTGAGCTTGTGTGAATTACTCTTTTCCAGAGAAAGAAGTTATTTTTATTAG	VAVKMLNVTAPTPHSYKPSRMK*EYSGELV*ITLFQRKKLFLL	2	2	3	3	7	6		19.2539	16.6992	25.2821	29.3634	61.736	54.1135		20.4117	48.4043		0.421693
TGTGGCAGTGAAAATGTTGAATGTGACAGCACCTACACCCTTACAAGCCTTCAAAAATGAAGTAGGAGTACTCAGGTGAGCTTGTGTGAATTACTCTTTTCCAGAGAAAGAAGTTATTTTTATTAGCTCCT	VAVKMLNVTAPTPLQAFKNEVGVLR*ACVNYSFPEKEVIFISS	2	2	3	1	4	8		19.2539	16.6992	25.2821	9.7878	35.2777	72.1514		20.4117	39.0723		0.52241
TGTGGCAGTGAAAATGTTGAATGTGACAGCACCTACACCTCACAGTTACAAGCCTTCAAAAGTGAAGTAGGAGTACTCAGGTGAGCTTGTGTGAATTACTCTTTTCCAGAGAAAGAAGTTATTTTTATTAG	VAVKMLNVTAPTPHSYKPSKVK*EYSGELV*ITLFQRKKLFLL	2	2	3	1	3	7		19.2539	16.6992	25.2821	9.7878	26.4583	63.1325		20.4117	33.1262		0.616182
TGTGGCAGTGAAAATGTTGAATGTGACAGCACCTACACAGTTACAAGCCTTCAAAAATGAAGTAGGAGTACTCAGGTGAGCTTGTGTGAATTACTCTTTTCCAGGGAAAGAAGTTATTTTTATTAGCTCCT	VAVKMLNVTAPTQLQAFKNEVGVLR*ACVNYSFPGKEVIFISS	2	2	3	0	0	1		19.2539	16.6992	25.2821	0	0	9.01892		20.4117	3.00631		6.78964
TGTGGCAGTGAAAATGTTGAATGTGACAGCACCTACACCTCAGCAGTTACAAGCCTTCAAAAATGAAGTAGGAGTACTCAGGTGAGCTTGTGTGAATTACTCTTTTCCAGAGAAGGAAGTTATTTTTATTA	VAVKMLNVTAPTPQQLQAFKNEVGVLR*ACVNYSFPEKEVIFI	2	3	2	53	73	8		19.2539	25.0488	16.8547	518.753	643.818	72.1514		20.3858	411.574		0.0495313
TGTGGCAGTGAAAATGTTGAATGTGACAGCACCTACACCTCCAGTTACAAGCCTTCAAAAATGAAGTAGGAGTACTCAGGTGAGCTTGTGTGAATTACTCCTTTCCAGAGAAAGAAGTTATTTTTATTAGC	VAVKMLNVTAPTPPVTSLQK*SRSTQVSLCELLLSRERSYFY*	2	3	2	7	5	8		19.2539	25.0488	16.8547	68.5146	44.0972	72.1514		20.3858	61.5877		0.331005
TGTGGCAGTGAAAATGTCGAATGTGACAGCACCTACACCTCCAGTTACAAGCCTTCAAAAATGAAGTAGGAGTACTCAGGTGAGCTTGTGTGAATTACTCTTTTCCAGAGAAAGAAGTTATTTTTATTAGC	VAVKMSNVTAPTPPVTSLQK*SRSTQVSLCELLFSRERSYFY*	2	3	2	1	4	9		19.2539	25.0488	16.8547	9.7878	35.2777	81.1703		20.3858	42.0786		0.48447
TGTGGCAGTGAAAATGTTGAATGTGACAGCACCTACACCCAGTTACAAGCCTTCAAAAATGAGGTAGGAGTACTCAGGTGAGCTTGTGTGAATTACTCTTTTCCAGAGAAAGAAGTTATTTTTATTAGCTC	VAVKMLNVTAPTPSYKPSKMR*EYSGELV*ITLFQRKKLFLLA	2	3	2	0	2	3		19.2539	25.0488	16.8547	0	17.6389	27.0568		20.3858	14.8985		1.36831
TGTGGCAGTGAAAAGGTTGAATGTGACAGCACCTACACCTCAGTTACAAGCCTTCAAAAATGAAGTAGGAGTACTCAGGTGAGCTTGTGTGAATTACTCTTTTCCAGAGAAAGAAGTTATTTTTATTAGCT	VAVKRLNVTAPTPQLQAFKNEVGVLR*ACVNYSFPEKEVIFIS	2	3	2	2	1	0		19.2539	25.0488	16.8547	19.5756	8.81943	0		20.3858	9.46501		2.15381
TGTGGCAGTGAAAATGTTGAATGTGACAGCACCTACACCTCAGCAGTTACAAGCCTTCAAAAATGAAGTAGGAGTACTCAGGCGAGCTTGTGTGAATTACTCTTTTCCAGAGAAAGAAGTTATTTTTATTA	VAVKMLNVTAPTPQQLQAFKNEVGVLRRACVNYSFPEKEVIFI	2	4	1	62	96	7		19.2539	33.3985	8.42737	606.844	846.665	63.1325		20.3599	505.547		0.040273
TGTGGCAGTGAAAATGTTGAATGTGACAGCACCTACACCTCAGCAGTTACAAGCCTTCAAAAATGAAGTAGGAGTACTCAGGTGAGCTTGTGCGAATTACTCTTTTCCAGAGAAAGAAGTTATTTTTATTA	VAVKMLNVTAPTPQQLQAFKNEVGVLR*ACANYSFPEKEVIFI	2	4	1	51	58	15		19.2539	33.3985	8.42737	499.178	511.527	135.284		20.3599	381.996		0.0532987
TGTGGCAGTGAAAATGTTGAATGTGACAGCACCTACACCTTCAAAAATGAAGTAGGAATACTCAGGTGAGCTTGTGTGAATTACTCTTTTCCAGAGAAAGAAGTTATTTTTATTAGCTCCTGGTTCCCAGT	VAVKMLNVTAPTPSKMK*EYSGELV*ITLFQRKKLFLLAPGSQ	2	4	1	2	0	9		19.2539	33.3985	8.42737	19.5756	0	81.1703		20.3599	33.582		0.606275
TGTGGCAGTGAAAATGTTGAATGTGACAGCACCTACACCTCCAGTTACAAGCCTTCAAAAATGAAGTAGGAGTACTCAGGTGAGCTTGTGTGAATTACTCTTTTCAAGAGAAAGAAGTTATTTTTATTAGC	VAVKMLNVTAPTPPVTSLQK*SRSTQVSLCELLFSRERSYFY*	2	4	1	2	0	6		19.2539	33.3985	8.42737	19.5756	0	54.1135		20.3599	24.563		0.828884
TGTGGCAGTGAAAATGTTGAATGTGACAGCACCTACACAGTTACAAGCCTTCAAAAATGAAGTAGGAGTACTAAGGTGAGCTTGTGTGAATTACTCTTTTCCAGAGAAAGAAGTTATTTTTATTAGCTCCT	VAVKMLNVTAPTQLQAFKNEVGVLR*ACVNYSFPEKEVIFISS	2	4	1	0	0	1		19.2539	33.3985	8.42737	0	0	9.01892		20.3599	3.00631		6.7724
TGTGGCAGTGAAAATGTTGAATGTGACAGCACCACAAGCCTTCAAAAATGAAGTAGGAGTACTCAGGTGAGCTTGTGTGAATTACTCTTTTCCAGAGAAAGAAGTTATTTTTATTAGCTCCTGGTTCCCAG	VAVKMLNVTAPQAFKNEVGVLR*ACVNYSFPEKEVIFISSWFP	2	5	0	8	4	4		19.2539	41.7481	0	78.3024	35.2777	36.0757		20.334	49.8853		0.407615
TGTGGCAGTGAAAATGTTGAATGTGACAGCACCTAACCTACAGTTACAAGCCTTCAAAAATGAAGTAGGAGTACTCAGGTGAGCTTGTGTGAATTACTCTTTTCCAGAGAAAGAAGTTATTTTTATTAGCT	VAVKMLNVTAPNLQLQAFKNEVGVLR*ACVNYSFPEKEVIFIS	1	0	6	0	2	2		9.62696	0	50.5642	0	17.6389	18.0378		20.0637	11.8922		1.68713
TGTGGCAGTGAAAATGTTGAATGTGACAGCACCTACACCTCAGCCTTCAAAAATGAAGTAGGAGTACTCAGGTGAGCTTGTATGAATTACTCTTTTCCAGAGAAAGAAGTTATTTTTATTAGCTCCTGGTT	VAVKMLNVTAPTPQPSKMK*EYSGELV*ITLFQRKKLFLLAPG	1	1	5	0	1	0		9.62696	8.34962	42.1368	0	8.81943	0		20.0378	2.93981		6.81602
TGTGGCAGTGAAAATGTTGAATGTGACAGCACCTAGCAGTTACAAGCCTTCAAAAATGAAGTAGGAGTACTCAGGTGAGCTTGTGTGAATTACTCTTTTCCAGAGAAAGAAGTTATTTTTATTAGCTCCTG	VAVKMLNVTAPSSYKPSKMK*EYSGELV*ITLFQRKKLFLLAP	1	2	4	5	13	16		9.62696	16.6992	33.7095	48.939	114.653	144.303		20.0119	102.631		0.194988
TGTGGCAGTGAAAATGTTGAATGTGACAGCACCTACACCTCAGGTTACAAGCCTTCAAAGATGAAGTAGGAGTACTCAGGTGAGCTTGTGTGAATTACTCTTTTCCAGAGAAAGAAGTTATTTTTATTAGC	VAVKMLNVTAPTPQVTSLQR*SRSTQVSLCELLFSRERSYFY*	1	2	4	5	2	7		9.62696	16.6992	33.7095	48.939	17.6389	63.1325		20.0119	43.2368		0.462844
TGTGGCAGTGAAAATGTTGAATGTGACAGCACCTACACCTCAGCCTTCAAAAATGAAGTAGAAGTACTCAGGTGAGCTTGTGTGAATTACTCTTTTCCAGAGAAAGAAGTTATTTTTATTAGCTCCTGGTT	VAVKMLNVTAPTPQPSKMK*KYSGELV*ITLFQRKKLFLLAPG	1	3	3	4	4	13		9.62696	25.0488	25.2821	39.1512	35.2777	117.246		19.986	63.8916		0.31281
TGTGGCAGTGAAAATGTTGAATGTGACAGCACCTACAACAAGCCTTCAAAAATGAAGTAGGAGTACTCAGGTGAGCTTGTGTGAATTACTCTTTTCCAGAGAAAGAAGTTATTTTTATTAGCTCCTGGTTC	VAVKMLNVTAPTTSLQK*SRSTQVSLCELLFSRERSYFY*LLV	1	3	3	5	1	9		9.62696	25.0488	25.2821	48.939	8.81943	81.1703		19.986	46.3096		0.431573
TGTGGCAGTGAAAATGTTGAATGTGACAGCACCTACACCCCAGTTACAAGCCTTCAAAGATGAAGTAGGAGTACTCAGGTGAGCTTGTGTGAATTACTCTTTTCCAGAGAAAGAAGTTATTTTTATTAGCT	VAVKMLNVTAPTPQLQAFKDEVGVLR*ACVNYSFPEKEVIFIS	1	3	3	2	0	1		9.62696	25.0488	25.2821	19.5756	0	9.01892		19.986	9.53151		2.09683
TGTGGCAGTGAGAATGTTGAATGTGACAGCACCTACACAGTTACAAGCCTTCAAAAATGAAGTAGGAGTACTCAGGTGAGCTTGTGTGAATTACTCTTTTCCAGAGAAAGAAGTTATTTTTATTAGCTCCT	VAVRMLNVTAPTQLQAFKNEVGVLR*ACVNYSFPEKEVIFISS	1	3	3	1	1	0		9.62696	25.0488	25.2821	9.7878	8.81943	0		19.986	6.20241		3.22229
TGTGGCAGTGAAAATGTTGAATGTGACAGCACCTACACCTCAGTTACAAGCCTGCAAAAATGAAGTAGGAGTACTCAGGTGAGCTTGTGTGAATTACTCTTTTCCAGAGAAAGAAGTTATTTTTATTAGCT	VAVKMLNVTAPTPQLQACKNEVGVLR*ACVNYSFPEKEVIFIS	1	3	3	0	0	2		9.62696	25.0488	25.2821	0	0	18.0378		19.986	6.01261		3.32401
TGTGGCAGTGAAAATGTTGAATGTGACAGCACCTACACCTCAGCCTTCAAAAATGAAGTAGGAGTACTCAGGTGAGCTTGTGTGAATTTCTCTTTTCCAGAGAAAGAAGTTATTTTTATTAGCTCCTGGTT	VAVKMLNVTAPTPQPSKMK*EYSGELV*ISLFQRKKLFLLAPG	1	4	2	2	1	1		9.62696	33.3985	16.8547	19.5756	8.81943	9.01892		19.9601	12.4713		1.60048
TGTGGCAGTGAAAATGTTGAATGTGACAGCACCTACACCTCAGTTACAAGCCTTCAAAAATGAAGTAGGAGTAGTCAGGTGAGCTTGTGTGAATTACTCTTTTCCAGAGAAAGAAGTTATTTTTATTAGCT	VAVKMLNVTAPTPQLQAFKNEVGVVR*ACVNYSFPEKEVIFIS	1	4	2	1	0	3		9.62696	33.3985	16.8547	9.7878	0	27.0568		19.9601	12.2815		1.62521
TGGGGCAGTGAAAATGTTGAATGTGACAGCACCTACACCTCAGTTACAAGCCTTCAAAAATGAAGTAGGAGTACTCAGGGGAGCTTGTGTGAATTACTCTTTTCCAGAGAAAGAAGTTATTTTTATTAGCT	GAVKMLNVTAPTPQLQAFKNEVGVLRGACVNYSFPEKEVIFIS	1	4	2	1	0	0		9.62696	33.3985	16.8547	9.7878	0	0		19.9601	3.2626		6.11784
TGTGGCAGTGAAAATGTTGAATGTGACAGCACCTACACCTCCAGTTACAAGCCTTCAAAAATGAAGTAGGAGTACTCAGGTGAGCTTGTGTGAATTACTCTTCTCCAGAGAAAGAAGTTATTTTTATTAGC	VAVKMLNVTAPTPPVTSLQK*SRSTQVSLCELLFSRERSYFY*	1	5	1	4	4	1		9.62696	41.7481	8.42737	39.1512	35.2777	9.01892		19.9341	27.8159		0.716644
TGTGGCAGTGAAAATGTTGAATGTGACAGCACCTACACCTCAGCAAAAAATGAAGTAGGAGTACTCAGGTGAGCTTGTGTGAATTACTCTTTTCCAGAGAAAGAAGTTATTTTTATTAGCTCCTGGTTCCC	VAVKMLNVTAPTPQQKMK*EYSGELV*ITLFQRKKLFLLAPGS	1	6	0	18	2	10		9.62696	50.0977	0	176.18	17.6389	90.1892		19.9082	94.6695		0.210292
TGTGTTACAAGCCTTCAAAAATGAAGTAGGAGTACTCAGGTGAGCTTGTGTGAATTACTCTTTTCCAGAGAAAGAAGTTATTTTTATTAGCTCCTGGTTCCCAGTGGACAGTGCAGGGGAAAGAATAGTAG	VLQAFKNEVGVLR*ACVNYSFPEKEVIFISSWFPVDSAGERIV	1	6	0	8	5	4		9.62696	50.0977	0	78.3024	44.0972	36.0757		19.9082	52.8251		0.376871
TGTGGCAGTGAAAATGTTGAATGTGACAGCACCTACACCTAGCCTTCAAAAATGAAGTAGGAGTACTCAGGTGAGCTTGTGTGAATTACTCTTTTCCAGAGAAAGAAGTTATTTTTATTAGCTCCTGGTTC	VAVKMLNVTAPTPSLQK*SRSTQVSLCELLFSRERSYFY*LLV	1	6	0	3	2	8		9.62696	50.0977	0	29.3634	17.6389	72.1514		19.9082	39.7179		0.501241
TGTGGCAGTGAGAATGTTGAATGTGACAGCACCTACACCTTCAAAAATGAAGTAGGAGTACTCAGGTGAGCTTGTGTGAATTACTCTTTTCCAGAGAAAGAAGTTATTTTTATTAGCTCCTGGTTCCCAGT	VAVRMLNVTAPTPSKMK*EYSGELV*ITLFQRKKLFLLAPGSQ	1	6	0	0	0	0		9.62696	50.0977	0	0	0	0		19.9082	0		-1
TGTGGCAGTGAAAATGTTGAATGTGACATTCAAAAATGAAGTAGGAGTACTCAGGTGAGCTTGTGTGAATTACTCTTTTCCAGAGAAAGAAGTTATTTTTATTAGCTCCTGGTTCCCAGTGGACAGTGCAG	VAVKMLNVTFKNEVGVLR*ACVNYSFPEKEVIFISSWFPVDSA	0	0	7	1	1	1		0	0	58.9916	9.7878	8.81943	9.01892		19.6639	9.20872		2.13535
TGTGGCAGTGAAAATGTTGAATGTGACAGCACCTACACCTCAAAAATGCACCTACAAGCCTTCAAAAATGAAGTAGGAGTACTCAGGTGAGCTTGTGTGAATTACTCTTTTCCAGAGAAAGAAGTTATTTT	VAVKMLNVTAPTPQKCTYKPSKMK*EYSGELV*ITLFQRKKLF	0	0	7	1	2	0		0	0	58.9916	9.7878	17.6389	0		19.6639	9.14222		2.15088
TGTGGCAGTGAAAATGTTGAATGTGACAGCACCTACACCTACGCCTTCAAAAATGAAGTAGGAGTACTCAGGTGAGCTTGTGTGAATTACTCTTTTCCAGAGAAAGAAGTTATTTTTATTAGCTCCTGGTT	VAVKMLNVTAPTPTPSKMK*EYSGELV*ITLFQRKKLFLLAPG	0	0	7	1	1	0		0	0	58.9916	9.7878	8.81943	0		19.6639	6.20241		3.17036
TGTGGCAGTGAAAATGTACAGTTACAAGCCTTCAAAAATGAAGTAGGAGTACTCAGGTGAGCTTGTGTGAATTACTCTTTTCCAGAGAAAGAAGTTATTTTTATTAGCTCCTGGTTCCCAGTGGACAGTGC	VAVKMYSYKPSKMK*EYSGELV*ITLFQRKKLFLLAPGSQWTV	0	0	7	0	0	2		0	0	58.9916	0	0	18.0378		19.6639	6.01261		3.27043
TGTGGCAGTGAAAATGTTGAATGTGACAGCACCTACACCTGAGGCTTGTAACAGTTACAAGCCTTCAAAAATGAAGTAGGAGTACTCAGGTGAGCTTGTGTGAATTACTCTTTTCCAGAGAAAGAAGTTAT	VAVKMLNVTAPTPEACNSYKPSKMK*EYSGELV*ITLFQRKKL	0	0	7	0	0	2		0	0	58.9916	0	0	18.0378		19.6639	6.01261		3.27043
TGTGGCAGTGAAAATGTTGAATGTGACAGCACCTACACCTCAGTTACAAGCCTTCAAAAATGAAGTAGGAGTACTCAGGTGAGCTTGTGTGAATTACTCTTTTCCAGAGAAAGAAGAGAAAGAAGTTATTT	VAVKMLNVTAPTPQLQAFKNEVGVLR*ACVNYSFPEKEEKEVI	0	0	7	0	0	1		0	0	58.9916	0	0	9.01892		19.6639	3.00631		6.54087
TGTGGCAGTGAAAATGTTGAATGTGACAGCACCTACACCTCAGAAATGTAGTAGCCTTCAAAAATGAAGTAGGAGTACTCAGGTGAGCTTGTGTGAATTACTCTTTTCCAGAGAAAGAAGTTATTTTTATT	VAVKMLNVTAPTPQKCSSLQK*SRSTQVSLCELLFSRERSYFY	0	0	7	0	0	1		0	0	58.9916	0	0	9.01892		19.6639	3.00631		6.54087
TGTGGCAGTGAAAATGTTGAATGTGACAGCACCTACACCTCAGCCTTCAAGTTACAAGCCTTCAAAAATGAAGTAGGAGTACTCAGGTGAGCTTGTGTGAATTACTCTTTTCCAGAGAAAGAAGTTATTTT	VAVKMLNVTAPTPQPSSYKPSKMK*EYSGELV*ITLFQRKKLF	0	0	7	0	0	0		0	0	58.9916	0	0	0		19.6639	0		-1
TGTGGCAGTGAAAATGTTGAATGTGACAGCACCTACACCTCAGAAATGAAGTACAAGCCTTCAAAAATGAAGTAGGAGTACTCAGGTGAGCTTGTGTGAATTACTCTTTTCCAGAGAAAGAAGTTATTTTT	VAVKMLNVTAPTPQK*STSLQK*SRSTQVSLCELLFSRERSYF	0	0	7	0	0	0		0	0	58.9916	0	0	0		19.6639	0		-1
TGTGGCAGTGAAAATGTTGAATGTGACAGCACCTACACCTCAGAGATTACAAGCCTTCAAAAATGAAGTAGGAGTACTCAGGTGAGCTTGTGTGAATTACTCTTTTCCAGAGAAAGAAGTTATTTTTATTA	VAVKMLNVTAPTPQRLQAFKNEVGVLR*ACVNYSFPEKEVIFI	0	0	7	0	0	0		0	0	58.9916	0	0	0		19.6639	0		-1
TGTGGCAGTGAAAATGTTGAATGTGACAGTTACAAGCCTTCAGTTACAAGCCTTCAAAAATGAAGTAGGAGTACTCAGGTGAGCTTGTGTGAATTACTCTTTTCCAGAGAAAGAAGTTATTTTTATTAGCT	VAVKMLNVTVTSLQLQAFKNEVGVLR*ACVNYSFPEKEVIFIS	0	0	7	0	0	0		0	0	58.9916	0	0	0		19.6639	0		-1
TGTGGCAGTGAAAATGTTGAATGTGACAGCACCTACACCTTCAAAATGTTTGTTACAAGCCTTCAAAAATGAAGTAGGAGTACTCAGGTGAGCTTGTGTGAATTACTCTTTTCCAGAGAAAGAAGTTATTT	VAVKMLNVTAPTPSKCLLQAFKNEVGVLR*ACVNYSFPEKEVI	0	0	7	0	0	0		0	0	58.9916	0	0	0		19.6639	0		-1
TGTGGCAGTGAAAATGTTGAATAAGCCTTCAAAAATGAAGTAGGAGTACTCAGGTGAGCTTGTGTGAATTACTCTTTTCCAGAGAAAGAAGTTATTTTTATTAGCTCCTGGTTCCCAGTGGACAGTGCAGG	VAVKMLNKPSKMK*EYSGELV*ITLFQRKKLFLLAPGSQWTVQ	0	0	7	0	0	0		0	0	58.9916	0	0	0		19.6639	0		-1
TGTGGCAGTGAAAATGTTGAATGTGACAGCACCTACACCTCAGCCTACTCAGGTGAGCTTGTGTGAATTACTCTTTTCCAGAGAAAGAAGTTATTTTTATTAGCTCCTGGTTCCCAGTGGACAGTGCAGGG	VAVKMLNVTAPTPQPTQVSLCELLFSRERSYFY*LLVPSGQCR	0	0	7	0	0	0		0	0	58.9916	0	0	0		19.6639	0		-1
TGTGGCAGTGAAAATGTTGAATGTGACAGCACCTACACCTTTTCTTTCCAGAGAAAGAAGTTATTTTTATTAGCTCCTGGTTCCCAGTGGACAGTGCAGGGGAAAGAATAGTAGAAGATCGGAAGAGCACA	VAVKMLNVTAPTPFLSRERSYFY*LLVPSGQCRGKNSRRSEEH	0	0	7	0	0	0		0	0	58.9916	0	0	0		19.6639	0		-1
TGTGGCAGTGAAAATGTTGAATGTGACAGCTTTACAAGCCTTCAAAAATGAAGTAGGAGTACTCAGGTGAGCTTGTGTGAATTACTCTTTTCCAGAGAAAGAAGTTATTTTTATTAGCTCCTGGTTCCCAG	VAVKMLNVTALQAFKNEVGVLR*ACVNYSFPEKEVIFISSWFP	0	0	7	0	0	0		0	0	58.9916	0	0	0		19.6639	0		-1
TGTGGCAGTGAAAATGTTGAATGTGACAGCACCTTTCTCTGGAAAAGAAATTATTTTTATTAGCTCCTGGTTCCCAGTGGACAGTGCAGGGGAAAGAATAGTAGAAGATCGGAAGAGCACACGTCTGAACT	VAVKMLNVTAPFSGKEIIFISSWFPVDSAGERIVEDRKSTRLN	0	0	7	0	0	0		0	0	58.9916	0	0	0		19.6639	0		-1
TGTGGCAGTGAAAATGTTGAATGTGACAGCACCTACACCTCATTTTACAAGCCTTCAAAAATGAAGTAGGAGTACTCAGGTGAGCTTGTGTGAATTTCTCTTTTCCAGAGAAAGAAGTTATTTTTATTAGC	VAVKMLNVTAPTPHFTSLQK*SRSTQVSLCEFLFSRERSYFY*	0	0	7	0	0	0		0	0	58.9916	0	0	0		19.6639	0		-1
TGTGGCAGTGAAAATGTTGAATGTGACAGCACCTACACCTCAGTTGTAGGCCTTCAAAAATGAAGTAGGAGTACTCAGGTGAGCTTGTGTGAATTACTCTTTTCCAGAGAAAGAAGTTATTTTTATTAGCT	VAVKMLNVTAPTPQL*AFKNEVGVLR*ACVNYSFPEKEVIFIS	0	0	7	0	0	0		0	0	58.9916	0	0	0		19.6639	0		-1
TGTGGCAGTGAAAATGTTGAATGTGACAGCACCTACACCTCAGTTACAAGCTCAGTTACAAGGCTTGTAACCTCAGTTACAAGCCTTCAAAAATGAAGTAGGAGTACTCAGGTGAGCTTGTGTGAATTACT	VAVKMLNVTAPTPQLQAQLQGL*PQLQAFKNEVGVLR*ACVNY	0	0	7	0	0	0		0	0	58.9916	0	0	0		19.6639	0		-1
TGTGGCAGTGAAAATGTTGAATGTGACAGCACCTACACCTCACAATACAAGGAAAAAAGCTGTGTCTGTTATAAATATCATCCATCACATTTCACAGTTACAAGCCTTCAAAAATGAAGTAGGAGTACTCA	VAVKMLNVTAPTPHNTRKKAVSVINIIHHISQLQAFKNEVGVL	0	0	7	0	0	0		0	0	58.9916	0	0	0		19.6639	0		-1
TGTGGCAGTGAAAATGTTGAATGTGACAGCACCTACACCTACAAAATGACAGCACCTCAGCACCTACAAGCCTTCAAAAATGAAGTAGGAGTACTCAGGTGAGCTTGTGTGAATTACTCTTTTCCAGAGAA	VAVKMLNVTAPTPTK*QHLSTYKPSKMK*EYSGELV*ITLFQR	0	0	7	0	0	0		0	0	58.9916	0	0	0		19.6639	0		-1
TGTGGCAGTGAAAATGTTGAATGTGACAAAGAAGTTATTTTTATTAGCTCCTGGTTCCCAGTGGACAGTGCAGGGGAAAGAATAGTAGAAGATCGGAAGAGCACACGTCTGAACTCCAGTCACTTGAACAT	VAVKMLNVTKKLFLLAPGSQWTVQGKE**KIGRAHV*TPVT*T	0	0	7	0	0	0		0	0	58.9916	0	0	0		19.6639	0		-1
TGTGGCAGTGAAAATGTTGAATGTGACAGCACCTACACCTGAGTAGGAGTACTCAGGTGAGCTTGTGTGAATTACTCTTTTCCAGAGAAAGAAGTTATTTTTATTAGCTCCTGGTTCCCAGTGGACAGTGC	VAVKMLNVTAPTPE*EYSGELV*ITLFQRKKLFLLAPGSQWTV	0	1	6	0	5	10		0	8.34962	50.5642	0	44.0972	90.1892		19.6379	44.7621		0.438718
TGTGGCAGTGAAAATGTTGAATGTGACAGCACCTACACCTCAAAATTTACAAGCCTTCAAAAATGAAGTAGGAGTACTCAGGTGAGCTTGTGTGAATTACTCTTTTCCAGAGAAAGAAGTTATTTTTATTA	VAVKMLNVTAPTPQNLQAFKNEVGVLR*ACVNYSFPEKEVIFI	0	1	6	0	4	5		0	8.34962	50.5642	0	35.2777	45.0946		19.6379	26.7908		0.733011
TGTGGCAGTGAAAATGTTGAATGTGACAGCACCTACACCTCTTGTTACAAGCCTTCAAAAATGAAGTAGGAGTACTCAGGTGAGCTTGTGTGAATTACTCTTTTCCAGAGAAAGAAGTTATTTTTATTAGC	VAVKMLNVTAPTPLVTSLQK*SRSTQVSLCELLFSRERSYFY*	0	1	6	0	0	2		0	8.34962	50.5642	0	0	18.0378		19.6379	6.01261		3.26612
TGTGGCAGTGAAAATGTTGAATGTGACAGCACCTACACCTCAGCAGTTACAAGCCTTCAAAAATGAAGTAGGAGTACTCAGGTGAGCTTGTGTGAATTACTCCTTTCCAGAGAAAGAAGTTATTTTTATTA	VAVKMLNVTAPTPQQLQAFKNEVGVLR*ACVNYSFPEKEVIFI	0	2	5	66	76	16		0	16.6992	42.1368	645.995	670.277	144.303		19.612	486.858		0.0402828
TGTGGCAGTGAAAATGTTGAATGTGACAGCACCTACACTGCAGTTACAAGCCTTCAAAAATGAAGTAGGAGTACTCAGGTGAGCTTGTGTGAATTACTCTTTTCCAGAGAAAGAAGTTATTTTTATTAGCT	VAVKMLNVTAPTLQLQAFKNEVGVLR*ACVNYSFPEKEVIFIS	0	3	4	13	3	12		0	25.0488	33.7095	127.241	26.4583	108.227		19.5861	87.3089		0.224331
TGTGGCAGTGAAAATGTTGAATGTGACAGCACCTACACCTCAGCAGTTACAAGCCTTCAAAAATGAAGTAGGAGTACTCAGGTGAGCTTGTGTGAGTTACTCTTTTCCAGAGAAAGAAGTTATTTTTATTA	VAVKMLNVTAPTPQQLQAFKNEVGVLR*ACVSYSFPEKEVIFI	0	4	3	27	28	4		0	33.3985	25.2821	264.271	246.944	36.0757		19.5602	182.43		0.10722
TGTGGCAGTGAAAATGTTGAATGTGACAGCACCTACTACAAGCCTTCAAAAATGAAGTAGGAGTACTCAGGTGAGCTTGTGTGAATTACTCTTTTCCAGAGAAAGAAGTTATTTTTATTAGCTCCTGGTTC	VAVKMLNVTAPTTSLQK*SRSTQVSLCELLFSRERSYFY*LLV	0	4	3	1	2	3		0	33.3985	25.2821	9.7878	17.6389	27.0568		19.5602	18.1611		1.07704
TGTGGCAGTGAAAATGTTGAATGTGACAGCACCTACAAAAATGAAGCCTTCAAAAATGAAGTAGGAGTACTCAGGTGAGCTTGTGTGAATTACTCTTTTCCAGAGAAAGAAGTTATTTTTATTAGCTCCTG	VAVKMLNVTAPTKMKPSKMK*EYSGELV*ITLFQRKKLFLLAP	0	4	3	0	0	1		0	33.3985	25.2821	0	0	9.01892		19.5602	3.00631		6.50638
TGTGGCAGTGAAAATGTTGAATGTACAAGCCTTCAAAAATGAAGTAGGAGTACTCAGGTGAGCTTGTGTGAATTACTCTTTTCCAGAGAAAGAAGTTATTTTTATTAGCTCCTGGTTCCCAGTGGACAGTG	VAVKMLNVQAFKNEVGVLR*ACVNYSFPEKEVIFISSWFPVDS	0	5	2	5	6	8		0	41.7481	16.8547	48.939	52.9166	72.1514		19.5343	58.0023		0.336784
TGTGGCAGTGAAAATGTTGAATGTGACAGCACCTACACCTCAAAAAGTTACAAGCCTTCAAAAATGAAGTAGGAGTACTCAGGTGAGCTTGTGTGAATTACTCTTTTCCAGAGAAAGAAGTTATTTTTATT	VAVKMLNVTAPTPQKVTSLQK*SRSTQVSLCELLFSRERSYFY	0	5	2	1	3	13		0	41.7481	16.8547	9.7878	26.4583	117.246		19.5343	51.164		0.381797
TGTGGCAGTGAAAATGTTGAATGTGACAGCACCTACACCTCAGCTTGTACAAGCCTTCAAAAATGAAGTAGGAGTACTCAGGTGAGCTTGTGTGAATTACTCTTTTCCAGAGAAAGAAGTTATTTTTATTA	VAVKMLNVTAPTPQLVQAFKNEVGVLR*ACVNYSFPEKEVIFI	0	7	0	2	2	1		0	58.4473	0	19.5756	17.6389	9.01892		19.4824	15.4111		1.26418
TGTGGCAGTGAAAATGTTGAATGTGAATTACTCTTTTCCAGAGAAAGAAGTTATTTTTATTAGCTCCTGGTTCCCAGTGGACAGTGCAGGGGAAAGAATAGTAGAAGATCGGAAGAGCACACGTCTGAACT	VAVKMLNVNYSFPEKEVIFISSWFPVDSAGERIVEDRKSTRLN	0	7	0	0	3	0		0	58.4473	0	0	26.4583	0		19.4824	8.81943		2.20904
TGTGGCAGTGAAAATGTTGAATGTGACAGCACCTACACCTCAACAGTTGTAACTGTTACAAGCCTTCAAAAATGAAGTAGGAGTACTCAGGTGAGCTTGTGTGAATTACTCTTTTCCAGAGAAAGAAGTTA	VAVKMLNVTAPTPQQL*LLQAFKNEVGVLR*ACVNYSFPEKEV	0	7	0	0	3	0		0	58.4473	0	0	26.4583	0		19.4824	8.81943		2.20904
TGTGGCAGTGAAAATGTTGAATGTGAGGTGTTACAAGCCTTCAAAAATGAAGTAGGAGTACTCAGGTGAGCTTGTGTGAATTACTCTTTTCCAGAGAAAGAAGTTATTTTTATTAGCTCCTGGTTCCCAGT	VAVKMLNVRCYKPSKMK*EYSGELV*ITLFQRKKLFLLAPGSQ	0	7	0	0	1	1		0	58.4473	0	0	8.81943	9.01892		19.4824	5.94612		3.2765
TGTGGCAGTGAAAATGTTGAATGTGACAGCACCTACACCTCAGTTACTCAGCCTTCAAAAATGAAGTAGGAGTACTCAGGTGAGCTTGTGTGAATTACTCTTTTCCAGAGAAAGAAGTTATTTTTATTAGC	VAVKMLNVTAPTPQLLSLQK*SRSTQVSLCELLFSRERSYFY*	0	7	0	0	2	0		0	58.4473	0	0	17.6389	0		19.4824	5.87962		3.31355
TGTGGCAGTGAAAATGTTGAATGTACTCAGGTGAGCTTGTGTGAATTACTCTTTTCCAGAGAAAGAAGTTATTTTTATTAGCTCCTGGTTCCCAGTGGACAGTGCAGGGGAAAGAATAGTAGAAGATCGGA	VAVKMLNVLR*ACVNYSFPEKEVIFISSWFPVDSAGERIVEDR	0	7	0	0	0	1		0	58.4473	0	0	0	9.01892		19.4824	3.00631		6.48052
TGTGGCAGTGAAAATGTTGAATGTGACAGCACCTACACATTCAAAATGAATTCAAAAATGAAGTAGGAGTACTCAGGTGAGCTTGTGTGAATTACTCTTTTCCAGAGAAAGAAGTTATTTTTATTAGCTCC	VAVKMLNVTAPTHSK*IQK*SRSTQVSLCELLFSRERSYFY*L	0	7	0	0	1	0		0	58.4473	0	0	8.81943	0		19.4824	2.93981		6.62711
TGTGGCAGTGAAAATGTTGAATGTGAGGAGTACTCAGGTGAGCTTGTGTGAATTACTCTTTTCCAGAGAAAGAAGTTATTTTTATTAGCTCCTGGTTCCCAGTGGACAGTGCAGGGGAAAGAATAGTAGAA	VAVKMLNVRSTQVSLCELLFSRERSYFY*LLVPSGQCRGKNSR	0	7	0	0	0	0		0	58.4473	0	0	0	0		19.4824	0		-1
TGTGGCAGTGAAAATGTTGAATGTGACAGCACCTACACCTCAATTCAAAAATGAAGTAGGAGTACTCAGGTGAGCTTGTGTGAATTACTCTTTTCCAGAGAAAGAAGTTATTTTTATTAGCTCCTGGTTCC	VAVKMLNVTAPTPQFKNEVGVLR*ACVNYSFPEKEVIFISSWF	0	7	0	0	0	0		0	58.4473	0	0	0	0		19.4824	0		-1
TGTGGCAGTGAAAATGTTGAATGTGACAGCACCTACACCTCAAGCCTTCAAAAATAAAGTAGGAGTACTCAGGTGAGCTTGTGTGAATTACTCTTTTCCAGAGAAAGAAGTTATTTTTATTAGCTCCTGGT	VAVKMLNVTAPTPQAFKNKVGVLR*ACVNYSFPEKEVIFISSW	0	7	0	0	0	0		0	58.4473	0	0	0	0		19.4824	0		-1
TGTGGCAGTGAAAATGTTGAATGTGACAGCACCTACAAGCCTTGCACAGTTACAAGCCTTCAAAAATGAAGTAGGAGTACTCAGGTGAGCTTGTGTGAATTACTCTTTTCCAGAGAAAGAAGTTATTTTTA	VAVKMLNVTAPTSLAQLQAFKNEVGVLR*ACVNYSFPEKEVIF	0	7	0	0	0	0		0	58.4473	0	0	0	0		19.4824	0		-1
TGTGGCAGTGAAAATGTTGAATGTGACAGCACCTACACCTTTTAAATTTTAAAAATTGAAATGACACTTGGAGTAACAATTGCCTTTTAGGTGATGTGGCAGTGAAAATGTTGAATGTGACAGCACCTACA	VAVKMLNVTAPTPFKF*KLK*HLE*QLPFR*CGSENVECDSTY	0	7	0	0	0	0		0	58.4473	0	0	0	0		19.4824	0		-1
TGTGGCAGTGAAAATGTTGAATGTGACAGCACCTACACCTCAGTTTCTAAAATTCTAAATTTTTTGAAGGCTCAGTTACAAGCCTTCAAAAATGAAGTAGGAGTACTCAGGTGAGCTTGTGTGAATTACTC	VAVKMLNVTAPTPQFLKF*IF*RLSYKPSKMK*EYSGELV*IT	0	7	0	0	0	0		0	58.4473	0	0	0	0		19.4824	0		-1
TGTGGCAGTGAAAATGTTGAATGTGACAGCACCTACACCTCAGTTACAAGTTACAAGTTTTGAAGTTACAAGCCTTCAAAAATGAAGTAGGAGTACTCAGGTGAGCTTGTGTGAATTACTCTTTTCCAGAG	VAVKMLNVTAPTPQLQVTSFEVTSLQK*SRSTQVSLCELLFSR	0	7	0	0	0	0		0	58.4473	0	0	0	0		19.4824	0		-1
TGTGGCAGTGAAAATGTTGAATGTGACAGCACCTACACCTCAGTTAAAATCAGTTACAAGCCTTCAAAAATGAAGTAGGAGTACTCAGGTGAGCTTGTGTGAATTACTCTTTTCCAGAGAAAGAAGTTATT	VAVKMLNVTAPTPQLKSVTSLQK*SRSTQVSLCELLFSRERSY	0	7	0	0	0	0		0	58.4473	0	0	0	0		19.4824	0		-1
TGTGGCAGTGAAAATGTTGAATGTGACAGCACCTACACCTCACCTAACCTACCTGAGGTTACAAGCCTTCAAAAATGAAGTAGGAGTACTCAGGTGAGCTTGTGTGAATTACTCTTTTCCAGAGAAAGAAG	VAVKMLNVTAPTPHLTYLRLQAFKNEVGVLR*ACVNYSFPEKE	0	7	0	0	0	0		0	58.4473	0	0	0	0		19.4824	0		-1
TGTGGCAGTGAAAATGTTGAATGTGACAGCACCTACACCTCAAAATGTAGCCTTCAAAATTACAAGCCTTCAAAAATGAAGTAGGAGTACTCAGGTGAGCTTGTGTGAATTACTCTTTTCCAGAGAAAGAA	VAVKMLNVTAPTPQNVAFKITSLQK*SRSTQVSLCELLFSRER	0	7	0	0	0	0		0	58.4473	0	0	0	0		19.4824	0		-1
TGTGGCAGTGAAAATGTTGAATGTGACAGCACCTACACCTACACTACAGTTACAAGCCTTCAAAAATGAAGTAGGAGTACTCAGGTGAGCTTGTGTGAATTACTCTTTTCCAGAGAAAGAAGTTATTTTTA	VAVKMLNVTAPTPTLQLQAFKNEVGVLR*ACVNYSFPEKEVIF	0	7	0	0	0	0		0	58.4473	0	0	0	0		19.4824	0		-1
TGTGGCAGTGAAAATGTTGAATGTGACAGCAACTTCATGTGAGGTTTTGAAGTTACAAGCCTTCAAAAATGAAGTAGGAGTACTCAGGTGAGCTTGTGTGAATTACTCTTTTCCAGAGAAAGAAGTTATTT	VAVKMLNVTATSCEVLKLQAFKNEVGVLR*ACVNYSFPEKEVI	0	7	0	0	0	0		0	58.4473	0	0	0	0		19.4824	0		-1
TGTGGCAGTGAAAATGTTGAACCAGTTACAAGCCTTCAAAAATGAAGTAGGAGTACTCAGGTGAGCTTGTGTGAATTACTCTTTTCCAGAGAAAGAAGTTATTTTTATTAGCTCCTGGTTCCCAGTGGACA	VAVKMLNQLQAFKNEVGVLR*ACVNYSFPEKEVIFISSWFPVD	0	7	0	0	0	0		0	58.4473	0	0	0	0		19.4824	0		-1
TGTGGCAGTGAAAATGTTGAATGTGACAGCACCTACACCAGCAGTTACAAGCCTTCAAAAATGAAGTAGGAGTACTCAGGTGAGCTTGTGTGAATTACTCTTTTCCAGAGAAAGAAGTTATTTTTATTAGC	VAVKMLNVTAPTPAVTSLQK*SRSTQVSLCELLFSRERSYFY*	6	0	0	4	2	14		57.7617	0	0	39.1512	17.6389	126.265		19.2539	61.0183		0.315543
TGTGGCAGTCAAAAATGAAGTAGGAGTACTCAGGTGAGCTTGTGTGAATTACTCTTTTCCAGAGAAAGAAGTTATTTTTATTAGCTCCTGGTTCCCAGTGGACAGTGCAGGGGAAAGAATAGTAGAAGATC	VAVKNEVGVLR*ACVNYSFPEKEVIFISSWFPVDSAGERIVED	6	0	0	0	0	4		57.7617	0	0	0	0	36.0757		19.2539	12.0252		1.60113
TGTGGCAGTGAAAATGTTGAATGTGACAGCACCTACACCTCTCCAGTTACAAGCCTTCAAAAATGAAGTAGGAGTACTCAGGTGAGCTTGTGTGAATTACTCTTTTCCAGAGAAAGAAGTTATTTTTATTA	VAVKMLNVTAPTPLQLQAFKNEVGVLR*ACVNYSFPEKEVIFI	6	0	0	0	0	4		57.7617	0	0	0	0	36.0757		19.2539	12.0252		1.60113
TGTGGCAGTGAAAATGTTGAATGTGACAGCACCTACACCTCAGCACACAAGCCTTCAAAAATGAAGTAGGAGTACTCAGGTGAGCTTGTGTGAATTACTCTTTTCCAGAGAAAGAAGTTATTTTTATTAGC	VAVKMLNVTAPTPQHTSLQK*SRSTQVSLCELLFSRERSYFY*	6	0	0	0	0	3		57.7617	0	0	0	0	27.0568		19.2539	9.01892		2.13484
TGTGGCAGTGAAAATGTTGAATGTGACAGCACCTACACCTCAGACACAAGCCTTCAAAAATGAAGTAGGAGTACTCAGGTGAGCTTGTGTGAATTACTCTTTTCCAGAGAAAGAAGTTATTTTTATTAGCT	VAVKMLNVTAPTPQTQAFKNEVGVLR*ACVNYSFPEKEVIFIS	6	0	0	0	0	2		57.7617	0	0	0	0	18.0378		19.2539	6.01261		3.20225
TGTGGCAGTGAAAATGTTGAATGTGACATTTTTGAAGTTACAAGCCTTCAAAAATGAAGTAGGAGTACTCAGGTGAGCTTGTGTGAATTACTCTTTTCCAGAGAAAGAAGTTATTTTTATTAGCTCCTGGT	VAVKMLNVTFLKLQAFKNEVGVLR*ACVNYSFPEKEVIFISSW	6	0	0	1	0	0		57.7617	0	0	9.7878	0	0		19.2539	3.2626		5.9014
TGTGGCAGTGAAAATGTTGAATGTGACAGCACCTACACCTCAGGGAAGGTTACAAGCCTTCAAAAATGAAGTAGGAGTACTCAGGTGAGCTTGTGTGAATTACTCTTTTCCAGAGAAAGAAGTTATTTTTA	VAVKMLNVTAPTPQGRLQAFKNEVGVLR*ACVNYSFPEKEVIF	6	0	0	1	0	0		57.7617	0	0	9.7878	0	0		19.2539	3.2626		5.9014
TGTGGCAGTGAAAATGTTGAATGTGACAGCACCTACACCTCAGTTACAAGCCTTACAAAATGAAGTAGGAGTACTCAGGTGAGCTTGTGTGAATTACTCTTTTCCAGAGAAAGAAGTTATTTTTATTAGCT	VAVKMLNVTAPTPQLQALQNEVGVLR*ACVNYSFPEKEVIFIS	6	0	0	0	0	1		57.7617	0	0	0	0	9.01892		19.2539	3.00631		6.40451
TGTGGCAGTGAAAATGTTACAAGCCTTCAAAATTGAAGTAGGAGTACTCAGGTGAGCTTGTGTGAATTACTCTTTTCCAGAGAAAGAAGTTATTTTTATTAGCTCCTGGTTCCCAGTGGACAGTGCAGGGG	VAVKMLQAFKIEVGVLR*ACVNYSFPEKEVIFISSWFPVDSAG	6	0	0	0	0	1		57.7617	0	0	0	0	9.01892		19.2539	3.00631		6.40451
TGTGGCAGTGAAAATGTTGAGCTTGAAAAACATTGAAAAACATTGAAAAACATTGAAAAACATTGAAAAGGTGAGCTTGTGTGAATTACTCTTTTCCAGAGAAAGAAGTTATTTTTATTAGCTCCTGGTTC	VAVKMLSLKNIEKH*KTLKNIEKVSLCELLFSRERSYFY*LLV	6	0	0	0	0	0		57.7617	0	0	0	0	0		19.2539	0		-1
TGTGGCAGTGAAAATGTTGAATGTGACAGCACCTACAAGCCTTCAGTTACAAGCCTTCAAAAATGAAGTAGGAGTACTCAGGTGAGCTTGTGTGAATTACTCTTTTCCAGAGAAAGAAGTTATTTTTATTA	VAVKMLNVTAPTSLQLQAFKNEVGVLR*ACVNYSFPEKEVIFI	6	0	0	0	0	0		57.7617	0	0	0	0	0		19.2539	0		-1
TGTGGCAGTGAAAATGTTGAATGTGACAGCACCTACACCTCAGCACTTCAAGCCTTCAAAAATGAAGTAGGAGTACTCAGGTGAGCTTGTGTGAATTACTCTTTTCCAGAGAAAGAAGTTATTTTTATTAG	VAVKMLNVTAPTPQHFKPSKMK*EYSGELV*ITLFQRKKLFLL	6	0	0	0	0	0		57.7617	0	0	0	0	0		19.2539	0		-1
TGTGGCAGTGAAAATGTTGAATGTGACAGCTCCTGGTTCCCAGTGGACAGTGCAGGGGAAAGAATAGTAGAAGATCGGAAGAGCACACGTCTGAACTCCAGTCACGGTCCACGATCTCGTATGCCGTCTTC	VAVKMLNVTAPGSQWTVQGKE**KIGRAHV*TPVTVHDLVCRL	6	0	0	0	0	0		57.7617	0	0	0	0	0		19.2539	0		-1
TGTGGCAGTGAAAATGTTGAATGTGACAGCACCTACACCTACTGCAGTTACAAGCCTTCAAAAATGAAGTAGGAGTACTCAGGTGAGCTTGTGTGAATTACTCTTTTCCAGAGAAAGAAGTTATTTTTATT	VAVKMLNVTAPTPTAVTSLQK*SRSTQVSLCELLFSRERSYFY	6	0	0	0	0	0		57.7617	0	0	0	0	0		19.2539	0		-1
TGTGGCAGTGAAAATGTTGAATGTGACAGCACCTACACCTCAGTTACAAGCCTTCAAAAATGAAGTAGGAGTACTCAGGTGAGCTTGTGTGAATTACTCTTTTCCAGAGAAAGAAGTTATTTTTACAAGCT	VAVKMLNVTAPTPQLQAFKNEVGVLR*ACVNYSFPEKEVIFTS	6	0	0	0	0	0		57.7617	0	0	0	0	0		19.2539	0		-1
TGTGGCAGTGAAAATGTTGAATGTGACAGCACCTTTGAAGGCTTCAAAAATGAAGTAGGAGTACTCAGGTGAGCTTGTGTGAATTACTCTTTTCCAGAGAAAGAAGTTATTTTTATTAGCTCCTGGTTCCC	VAVKMLNVTAPLKASKMK*EYSGELV*ITLFQRKKLFLLAPGS	6	0	0	0	0	0		57.7617	0	0	0	0	0		19.2539	0		-1
TGTGGCAGTGAAAATGTTGAATGTGACAGCACCTAGCACTTACAAGCCTTCAAAAATGAAGTAGGAGTACTCAGGTGAGCTTGTGTGAATTACTCTTTTCCAGAGAAAGAAGTTATTTTTATTAGCTCCTG	VAVKMLNVTAPSTYKPSKMK*EYSGELV*ITLFQRKKLFLLAP	6	0	0	0	0	0		57.7617	0	0	0	0	0		19.2539	0		-1
TGTGGCAGTGAAAATGTTGAATGTGACAGCACCTACACCTCAGTTGGCTAGTTACAAGCCTTCAAAAATGAAGTAGGAGTACTCAGGTGAGCTTGTGTGAATTACTCTTTTCCAGAGAAAGAAGTTATTTT	VAVKMLNVTAPTPQLASYKPSKMK*EYSGELV*ITLFQRKKLF	6	0	0	0	0	0		57.7617	0	0	0	0	0		19.2539	0		-1
TGTGGCAGTGAAAATGTTGAATGTGACAGCACCTACACCTCAGTTACAAGCCTTCAAAAATGAAAATGTTGAATGTGACAGCACCTACACCTCAGTTACAAGCCTTCAAAAATGAAGTAGGAGTACTCAGG	VAVKMLNVTAPTPQLQAFKNENVECDSTYTSVTSLQK*SRSTQ	6	0	0	0	0	0		57.7617	0	0	0	0	0		19.2539	0		-1
TGTGGCAGTGAAAATGTTGAATGTGACAGCACCTACACCTCAGTTACAAGCCTTCAAAAATGAAGTAGGAGTACTCAGGTGAGCTTGTGTGAATTACTCTTTTCCAGAGAAAGAAGGCAGTTACAAGCCTT	VAVKMLNVTAPTPQLQAFKNEVGVLR*ACVNYSFPEKEGSYKP	6	0	0	0	0	0		57.7617	0	0	0	0	0		19.2539	0		-1
TGTGGCAGTGAAAATGTTGAATGTGACAGCACCTACACCTCAGTTAGGTGTACAAGCCTTCAAAAATGAAGTAGGAGTACTCAGGTGAGCTTGTGTGAATTACTCTTTTCCAGAGAAAGAAGTTATTTTTA	VAVKMLNVTAPTPQLGVQAFKNEVGVLR*ACVNYSFPEKEVIF	6	0	0	0	0	0		57.7617	0	0	0	0	0		19.2539	0		-1
TGTGGCAGTGAAAATGTTGAATGTGACAGCACACTTCAAAAATGAAGTAGGAGTACTCAGGTGAGCTTGTGTGAATTACTCTTTTCCAGAGAAAGAAGTTATTTTTATTAGCTCCTGGTTCCCAGTGGACA	VAVKMLNVTAHFKNEVGVLR*ACVNYSFPEKEVIFISSWFPVD	6	0	0	0	0	0		57.7617	0	0	0	0	0		19.2539	0		-1
TGTGGCAGTGAAAATGTTGAATGTGACAGCACCTACACCTGATGTAACAAGCCTTCAAAAATGAAGTAGGAGTACTCAGGTGAGCTTGTGTGAATTACTCTTTTCCAGAGAAAGAAGTTATTTTTATTAGC	VAVKMLNVTAPTPDVTSLQK*SRSTQVSLCELLFSRERSYFY*	6	0	0	0	0	0		57.7617	0	0	0	0	0		19.2539	0		-1
TGTGGCAGTGAAAATGTTGAAAGTTACAAGCCTTCAAAAATGAAGTAGGAGTACTCAGGTGAGCTTGTGTGAATTACTCTTTTCCAGAGAAAGAAGTTATTTTTATTAGCTCCTGGTTCCCAGTGGACAGT	VAVKMLKVTSLQK*SRSTQVSLCELLFSRERSYFY*LLVPSGQ	5	0	1	2	0	14		48.1348	0	8.42737	19.5756	0	126.265		18.854	48.6135		0.387836
TGTGGCAGTGAAAATGTTGAATGTGACAGCACCTACACCTCACAGTTACAAGCCTTCAAAAATGGAGTAGGAGTACTCAGGTGAGCTTGTGTGAATTACTCTTTTCCAGAGAAAGAAGTTATTTTTATTAG	VAVKMLNVTAPTPHSYKPSKME*EYSGELV*ITLFQRKKLFLL	5	0	1	4	4	6		48.1348	0	8.42737	39.1512	35.2777	54.1135		18.854	42.8475		0.440027
TGTGGCAGTGAAAATGTTGAATGTGACAGCACCTACACCTCTTCAGTTACAAGCCTTCAAAAATGAAGTAGGAGTACTCAGGTGAGCTTGTGTGAATTACTCTTTTCCAGAGAAAGAAGTTATTTTTATTA	VAVKMLNVTAPTPLQLQAFKNEVGVLR*ACVNYSFPEKEVIFI	5	0	1	0	1	2		48.1348	0	8.42737	0	8.81943	18.0378		18.854	8.95242		2.10603
TGTGGCAGTGAAAATGTTGAATGTGACAGCACCTACACCTCAGTTACAAAGCCTTCAAAAATGAAGTAGGAGTACTCAGGTGAGCTTGTGTGAATTACTCTTTTCCAGAGAAAGAAGTTATTTTTATTAGC	VAVKMLNVTAPTPQLQSLQK*SRSTQVSLCELLFSRERSYFY*	5	1	0	1	2	2		48.1348	8.34962	0	9.7878	17.6389	18.0378		18.8281	15.1548		1.24238
TGTGGCAGTGAAAATGTTGAATGTGACAGCACCTACACCTCAACAGTTACAAGCTTTCAAAAATGAAGTAGGAGTACTCAGGTGAGCTTGTGTGAATTACTCTTTTCCAGAGAAAGAAGTTATTTTTATTA	VAVKMLNVTAPTPQQLQAFKNEVGVLR*ACVNYSFPEKEVIFI	5	1	0	0	0	0		48.1348	8.34962	0	0	0	0		18.8281	0		-1
TGTGGCAGTGAAAATGTTGAATGTGACAGCACCTACACCTCAAATGAGGTAGGAGTACTCAGGTGAGCTTGTGTGAATTACTCTTTTCCAGAGAAAGAAGTTATTTTTATTAGCTCCTGGTTCCCAGTGGA	VAVKMLNVTAPTPQMR*EYSGELV*ITLFQRKKLFLLAPGSQW	5	1	0	0	0	0		48.1348	8.34962	0	0	0	0		18.8281	0		-1
TGTGGCAGTGAAAATGTTGAATGTGACAGCACCTACACCTCAGTCAAGCCTTCAAAAATGAAGTAGGAGTACTCAGGTGAGCTTGTGTGAATTACTCTTTTCCAGAGAAAGAAGTTATTTTTATTAGCTCC	VAVKMLNVTAPTPQSSLQK*SRSTQVSLCELLFSRERSYFY*L	4	1	1	2	5	16		38.5078	8.34962	8.42737	19.5756	44.0972	144.303		18.4283	69.3252		0.265824
TGTGGCAGTGAAAATGTTGAATGTGACAGCACCTACACAGTTACAAGCCTTCAAAAATGAAGAAGGAGTACTCAGGTGAGCTTGTGTGAATTACTCTTTTCCAGAGAAAGAAGTTATTTTTATTAGCTCCT	VAVKMLNVTAPTQLQAFKNEEGVLR*ACVNYSFPEKEVIFISS	4	1	1	0	0	1		38.5078	8.34962	8.42737	0	0	9.01892		18.4283	3.00631		6.12987
TGTGGCAGTGAAAATGTTGAATGTGACAGCACCTAAAATGAAGTAGGAGTACTCAGGTGAGCTTGTGTGAATTACTCTTTTCCAGAGAAAGAAGTTATTTTTATTAGCTCCTGGTTCCCAGTGGACAGTGC	VAVKMLNVTAPKMK*EYSGELV*ITLFQRKKLFLLAPGSQWTV	4	2	0	5	3	9		38.5078	16.6992	0	48.939	26.4583	81.1703		18.4024	52.1892		0.352608
TGTGGCAGTGAAAATGTTGAATGTGACAGCACCTACACCTGAGGTGTACAAGCCTTCAAAAATGAAGTAGGAGTACTCAGGTGAGCTTGTGTGAATTACTCTTTTCCAGAGAAAGAAGTTATTTTTATTAG	VAVKMLNVTAPTPEVYKPSKMK*EYSGELV*ITLFQRKKLFLL	3	0	3	1	0	4		28.8809	0	25.2821	9.7878	0	36.0757		18.0543	15.2878		1.18096
TGTGGCAGTGAAGATGTTGAATGTGACAGCACCTACACCTCCAGTTACAAGCCTTCAAAAATGAAGTAGGAGTACTCAGGTGAGCTTGTGTGAATTACTCTTTTCCAGAGAAAGAAGTTATTTTTATTAGC	VAVKMLNVTAPTPPVTSLQK*SRSTQVSLCELLFSRERSYFY*	3	1	2	3	1	4		28.8809	8.34962	16.8547	29.3634	8.81943	36.0757		18.0284	24.7528		0.728337
TGTGGCAGTGAAAATGTTGAATGTGACAGCACCTACACCTCAGCCTTCAAAAATGAAGTAGGAGTACTCAGGTGAGCTTGTGTGAATTACCCTTTTCCAGAGAAAGAAGTTATTTTTATTAGCTCCTGGTT	VAVKMLNVTAPTPQPSKMK*EYSGELV*ITLFQRKKLFLLAPG	3	1	2	1	1	1		28.8809	8.34962	16.8547	9.7878	8.81943	9.01892		18.0284	9.20872		1.95775
TGTGGCAGTGAAAATGTTGAATGTGACAGCACCTACACCTCAGTTACAAGCCTTCAAAAAGGAAGTAGGAGTACTCAGGTGAGCTTGTGTGAATTACTCTTTTCCAGAGAAAGAAGTTATTTTTATTAGCT	VAVKMLNVTAPTPQLQAFKKEVGVLR*ACVNYSFPEKEVIFIS	3	1	2	0	1	1		28.8809	8.34962	16.8547	0	8.81943	9.01892		18.0284	5.94612		3.03196
TGTGGCAGTGAAAATGTTGAATGTGACAGCACCTACACCTCAGCAAGCCTTCAAAAATGAAGTGGGAGTACTCAGGTGAGCTTGTGTGAATTACTCTTTTCCAGAGAAAGAAGTTATTTTTATTAGCTCCT	VAVKMLNVTAPTPQQAFKNEVGVLR*ACVNYSFPEKEVIFISS	3	1	2	0	0	1		28.8809	8.34962	16.8547	0	0	9.01892		18.0284	3.00631		5.99686
TGTGGCAGTGAAAATGTTGAATGCGACAGCACCTACACCTCCAGTTACAAGCCTTCAAAAATGAAGTAGGAGTACTCAGGTGAGCTTGTGTGAATTACTCTTTTCCAGAGAAAGAAGTTATTTTTATTAGC	VAVKMLNATAPTPPVTSLQK*SRSTQVSLCELLFSRERSYFY*	3	2	1	0	2	8		28.8809	16.6992	8.42737	0	17.6389	72.1514		18.0025	29.9301		0.601485
TGTGGCAGTGAAAATGTTGAATGTGACAGCACCTACACCTCCAGTTACAAGCCTTCAAAAATGAAGTAGGAGTACTCAGGTGAGCTCGTGTGAATTACTCTTTTCCAGAGAAAGAAGTTATTTTTATTAGC	VAVKMLNVTAPTPPVTSLQK*SRSTQVSSCELLFSRERSYFY*	3	2	1	2	2	1		28.8809	16.6992	8.42737	19.5756	17.6389	9.01892		18.0025	15.4111		1.16815
TGTGGCAGTGAAAATGTTGAATGTGACAGCACCTACCAGTTACAAGCCTTCAAAAATGGAGTAGGAGTACTCAGGTGAGCTTGTGTGAATTACTCTTTTCCAGAGAAAGAAGTTATTTTTATTAGCTCCTG	VAVKMLNVTAPTSYKPSKME*EYSGELV*ITLFQRKKLFLLAP	3	2	1	1	2	1		28.8809	16.6992	8.42737	9.7878	17.6389	9.01892		18.0025	12.1485		1.48187
TGTGGCAGTGAAAATGTTGAATGTGACAGCACCTACACCTCAGTTACAAGCCTTCAAAAATGAAGTAGGAGTACTCAGGTGAGCTTGTGTGAATTACTCTTTTCCAGAGAAAGAAGTTATTTTTATTGCTC	VAVKMLNVTAPTPQLQAFKNEVGVLR*ACVNYSFPEKEVIFIA	3	2	1	0	2	1		28.8809	16.6992	8.42737	0	17.6389	9.01892		18.0025	8.88593		2.02595
TGTGGCAGTGAAAATGTTGAATGTGACAGCACCTACACCTCAGTTACAAGCCTTCAAAAATGAAGTAGGAGTACTCAGGTGAGCTTGTGTGAATTACTCTTCCAGAGAAAGAAGTTATTTTTATTAGCTCC	VAVKMLNVTAPTPQLQAFKNEVGVLR*ACVNYSSRERSYFY*L	3	2	1	1	1	0		28.8809	16.6992	8.42737	9.7878	8.81943	0		18.0025	6.20241		2.9025
GGTGGCAGTGAAAATGTTGAATGTGACAGCACCTACACCTCAGTTACAAGCCTTCAAAAATGAAGTAGGAGTACTCAGGTGAGCTTGTGTGAATTACTCTTTTCCAGAGAAAGAAGTTATTTTTATTAGCT	VAVKMLNVTAPTPQLQAFKNEVGVLR*ACVNYSFPEKEVIFIS	3	2	1	0	0	1		28.8809	16.6992	8.42737	0	0	9.01892		18.0025	3.00631		5.98824
TGTGGCAGTGAAAATGTTGAATGTGACAGCACCTACACACTTCAAAAATGAAGTAGGAGTACTCAGGTGAGCTTGTGTGAATTACTCTTTTCCAGAGAAAGAAGTTATTTTTATTAGCTCCTGGTTCCCAG	VAVKMLNVTAPTHFKNEVGVLR*ACVNYSFPEKEVIFISSWFP	3	2	1	0	0	1		28.8809	16.6992	8.42737	0	0	9.01892		18.0025	3.00631		5.98824
TGTGGCAGTGAAAATGTTGAATGTGACAGCACCTACACCTCAGTTACAAGCGTTCAAAAATGAAGTAGGAGTACTCAGGTGAGCTTGTGTGAATTACTCTTTTCCAGAGAAAGAAGTTATTTTTATTAGCT	VAVKMLNVTAPTPQLQAFKNEVGVLR*ACVNYSFPEKEVIFIS	3	2	1	0	0	0		28.8809	16.6992	8.42737	0	0	0		18.0025	0		-1
TGTGGCAGTGAAAATGTTGAATGTGACAGCACCTACACAGTTACAAGCCTTCAAAAATGAAGTAGGAGTAATCAGGTGAGCTTGTGTGAATTACTCTTTTCCAGAGAAAGAAGTTATTTTTATTAGCTCCT	VAVKMLNVTAPTQLQAFKNEVGVIR*ACVNYSFPEKEVIFISS	3	2	1	0	0	0		28.8809	16.6992	8.42737	0	0	0		18.0025	0		-1
TGTGGCAGTGAAAATGTTGAATGTGACAGCACCTACACCTCAGCAGTTACAAGCCTTCAAAAATGAAGTAGGAGCACTCAGGTGAGCTTGTGTGAATTACTCTTTTCCAGAGAAAGAAGTTATTTTTATTA	VAVKMLNVTAPTPQQLQAFKNEVGALR*ACVNYSFPEKEVIFI	3	3	0	25	37	7		28.8809	25.0488	0	244.695	326.319	63.1325		17.9766	211.382		0.085043
TGTGGCAGTGAAAATGTTGAATGTGACAGCACCTACACCTCCAGTTACAAGCCTTCAAAAATGAAGTAGGAGTACTCAGGTGAGCTTGTGTGAATCACTCTTTTCCAGAGAAAGAAGTTATTTTTATTAGC	VAVKMLNVTAPTPPVTSLQK*SRSTQVSLCESLFSRERSYFY*	3	3	0	3	4	3		28.8809	25.0488	0	29.3634	35.2777	27.0568		17.9766	30.566		0.588124
TGCGGCAGTGAAAATGTTGAATGTGACAGCACCTACACAGTTACAAGCCTTCAAAAATGAAGTAGGAGTACTCAGGTGAGCTTGTGTGAATTACTCTTTTCCAGAGAAAGAAGTTATTTTTATTAGCTCCT	AAVKMLNVTAPTQLQAFKNEVGVLR*ACVNYSFPEKEVIFISS	3	3	0	1	0	0		28.8809	25.0488	0	9.7878	0	0		17.9766	3.2626		5.50989
TGTGGCAGTGAAAATGTTGAATGTGACAGCACCTACACCAGTTACAAGCCTTCAAAAATGAGGTAGGAGTACTCAGGTGAGCTTGTGTGAATTACTCTTTTCCAGAGAAAGAAGTTATTTTTATTAGCTCC	VAVKMLNVTAPTPVTSLQK*GRSTQVSLCELLFSRERSYFY*L	2	0	4	3	2	4		19.2539	0	33.7095	29.3634	17.6389	36.0757		17.6545	27.6927		0.637514
TGTGGCAGTGAAAATGTTGAATGTGACAGCACCTACATCAAAAATGAAGTAGGAGTACTCAGGTGAGCTTGTGTGAATTACTCTTTTCCAGAGAAAGAAGTTATTTTTATTAGCTCCTGGTTCCCAGTGGA	VAVKMLNVTAPTSKMK*EYSGELV*ITLFQRKKLFLLAPGSQW	2	0	4	0	0	7		19.2539	0	33.7095	0	0	63.1325		17.6545	21.0442		0.838925
TGTGGCAGTGAAAATGTTGAATGTGACAGCACCTACACCTCAGAGTTACAAGCCTTCAAAAATGGAGTAGGAGTACTCAGGTGAGCTTGTGTGAATTACTCTTTTCCAGAGAAAGAAGTTATTTTTATTAG	VAVKMLNVTAPTPQSYKPSKME*EYSGELV*ITLFQRKKLFLL	2	0	4	2	1	3		19.2539	0	33.7095	19.5756	8.81943	27.0568		17.6545	18.4839		0.955125
TGTGGCAGTGAAAATGTTGAATGTGACAGCAGTTACACCTCAGTTACAAGCCTTCAAAAATGAAGTAGGAGTACTCAGGTGAGCTTGTGTGAATTACTCTTTTCCAGAGAAAGAAGTTATTTTTATTAGCT	VAVKMLNVTAVTPQLQAFKNEVGVLR*ACVNYSFPEKEVIFIS	2	0	4	0	0	0		19.2539	0	33.7095	0	0	0		17.6545	0		-1
TGTGGCAGTGAAAATGTTGAATGTGACAGCACCTACAAGCCTTCAAAAATGAAGTAGGAGTACTCAGGTGAGCTTGTGTGAATTACTCTTTTCCAGAGAAAGAAGTTATTTTTATTAGCTCCTGGTTCCCG	VAVKMLNVTAPTSLQK*SRSTQVSLCELLFSRERSYFY*LLVP	2	1	3	1	0	5		19.2539	8.34962	25.2821	9.7878	0	45.0946		17.6285	18.2941		0.963617
TGTGGCAGTGAAAATGTTGAATGTGACAGCACCTACACCCCAGTTACAAGCCTTCAAAAATGGAGTAGGAGTACTCAGGTGAGCTTGTGTGAATTACTCTTTTCCAGAGAAAGAAGTTATTTTTATTAGCT	VAVKMLNVTAPTPQLQAFKNGVGVLR*ACVNYSFPEKEVIFIS	2	1	3	1	0	1		19.2539	8.34962	25.2821	9.7878	0	9.01892		17.6285	6.26891		2.81206
TGTGGCAGTGAAAATGTTGAATGTGACAGCACCTACACCTCAGTTACAAGCCTTCAAAAATGAAGTAGGAGTACTCAGGTGAGCTTGTGTGAATTACTCTTTTCCAGACAAAGAAGTTATTTTTATTAGCT	VAVKMLNVTAPTPQLQAFKNEVGVLR*ACVNYSFPDKEVIFIS	2	1	3	0	0	2		19.2539	8.34962	25.2821	0	0	18.0378		17.6285	6.01261		2.93193
TGTGGCAGTGAAAATGTTGAATGTGACAGCACCTACACCTCAGTTACAAGCCTTCAAAAATGAAGTAGGAGTACTCAGGTGAGCTGGTGTGAATTACTCTTTTCCAGAGAAAGAAGTTATTTTTATTAGCT	VAVKMLNVTAPTPQLQAFKNEVGVLR*AGVNYSFPEKEVIFIS	2	1	3	0	0	2		19.2539	8.34962	25.2821	0	0	18.0378		17.6285	6.01261		2.93193
TGTGGCAGTGAAAATGTTGAATGTGACAGCACCTACACAGTTACAAGCCTTCAAAAATGAAGTAGGAGTACTCAGGTGAGCTTGTGTGAATTACTCTTTTCCAGAGAAAGAAGTTATTTCTATTAGCTCCT	VAVKMLNVTAPTQLQAFKNEVGVLR*ACVNYSFPEKEVISISS	2	1	3	0	0	0		19.2539	8.34962	25.2821	0	0	0		17.6285	0		-1
TGTGGCAGTGAAAATGTTGAATGTGACAGCACCTACACCTCAGTTTTGAAGTTACAAGCCTTCAAAAATGAAGTAGGAGTACTCAGGTGAGCTTGTGTGAATTACTCTTTTCCAGAGAAAGAAGTTATTTT	VAVKMLNVTAPTPQF*SYKPSKMK*EYSGELV*ITLFQRKKLF	2	2	2	3	1	4		19.2539	16.6992	16.8547	29.3634	8.81943	36.0757		17.6026	24.7528		0.711136
TGTGGCAGTGAAAATGTTGAATGTGACAGCACCTACACCTCCAGTTACAAGCCTTCAAAAATGAAGTAGGAGTACTCAGGTGAGCTTGTGTGAATTACTCTTTTCCAGGGAAAGAAGTTATTTTTATTAGC	VAVKMLNVTAPTPPVTSLQK*SRSTQVSLCELLFSRERSYFY*	2	2	2	2	1	5		19.2539	16.6992	16.8547	19.5756	8.81943	45.0946		17.6026	24.4965		0.718576
TGTGGCAGTGAAAATGTTGAATGTGACAGCACCTACACCTCAGTTACAAGCCTTCAAAAATGAAGTAGGAGTACTCAGGTGAGCTTGTGTGAAGTACTCTTTTCCAGAGAAAGAAGTTATTTTTATTAGCT	VAVKMLNVTAPTPQLQAFKNEVGVLR*ACVKYSFPEKEVIFIS	2	2	2	2	1	4		19.2539	16.6992	16.8547	19.5756	8.81943	36.0757		17.6026	21.4902		0.819099
TGTGGCAGTGAAAATGTTGAATGTGACAGCACCTACACCTCCAGTTACAAGCCTTCAAAAATGAAGTAGGAGTACTCAGGTGAGCTTGTGTGAATTACTCTTTTCCAGAGAAAGGAGTTATTTTTATTAGC	VAVKMLNVTAPTPPVTSLQK*SRSTQVSLCELLFSRERSYFY*	2	2	2	1	2	3		19.2539	16.6992	16.8547	9.7878	17.6389	27.0568		17.6026	18.1611		0.969247
TGTGGCAGTGAAAATGTTGGATGTGACAGCACCTACACAGTTACAAGCCTTCAAAAATGAAGTAGGAGTACTCAGGTGAGCTTGTGTGAATTACTCTTTTCCAGAGAAAGAAGTTATTTTTATTAGCTCCT	VAVKMLDVTAPTQLQAFKNEVGVLR*ACVNYSFPEKEVIFISS	2	2	2	1	1	1		19.2539	16.6992	16.8547	9.7878	8.81943	9.01892		17.6026	9.20872		1.91152
TGTGGCAGTGAAAATGTTGAATGTGACGGCACCTACACAGTTACAAGCCTTCAAAAATGAAGTAGGAGTACTCAGGTGAGCTTGTGTGAATTACTCTTTTCCAGAGAAAGAAGTTATTTTTATTAGCTCCT	VAVKMLNVTAPTQLQAFKNEVGVLR*ACVNYSFPEKEVIFISS	2	2	2	0	0	1		19.2539	16.6992	16.8547	0	0	9.01892		17.6026	3.00631		5.85523
TGTGGCAGTGAAAATGTTGAATGTGACAGCACCTACACAGTTACAAGCATTCAAAAATGAAGTAGGAGTACTCAGGTGAGCTTGTGTGAATTACTCTTTTCCAGAGAAAGAAGTTATTTTTATTAGCTCCT	VAVKMLNVTAPTQLQAFKNEVGVLR*ACVNYSFPEKEVIFISS	2	2	2	0	0	1		19.2539	16.6992	16.8547	0	0	9.01892		17.6026	3.00631		5.85523
TGTGGCAGTGAAAATGTTGAATGTGACAGCACCTACACCTCAAGCCTTCAAAAATGAAGTAGGAGTACTCAGGTGAGCTTGTGTGAATTACTCTTCTCCAGAGAAAGAAGTTATTTTTATTAGCTCCTGGT	VAVKMLNVTAPTPQAFKNEVGVLR*ACVNYSSPEKEVIFISSW	2	2	2	0	0	1		19.2539	16.6992	16.8547	0	0	9.01892		17.6026	3.00631		5.85523
TGTGGCAGTGAAAATGTTGAATGTGACAGCACCTACACCTCAGTTACAAGCCTTCAAAAATGAAGTAGGAGTACTCAGGGGAGCTTGTGGGAATTACTCTTTTCCAGAGAAAGAAGTTATTTTTATTAGCT	VAVKMLNVTAPTPQLQAFKNEVGVLRGACGNYSFPEKEVIFIS	2	2	2	0	0	0		19.2539	16.6992	16.8547	0	0	0		17.6026	0		-1
TGTGGCAGTGAAAATGTTGAATGTGACAGCATGAAGTAGGAGTACTCAGGTGAGCTTGTGTGAATTACTCTTTTCCAGAGAAAGAAGTTATTTTTATTAGCTCCTGGTTCCCAGTGGACAGTGCAGGGGAA	VAVKMLNVTA*SRSTQVSLCELLFSRERSYFY*LLVPSGQCRG	2	3	1	8	9	17		19.2539	25.0488	8.42737	78.3024	79.3749	153.322		17.5767	103.666		0.169551
TGTGGCAGTGAAAATGTTGAAGGTGACAGCACCTACACCTCAGTTACAAGCCTTCAAAAATGAAGTAGGAGTACTCAGGTGAGCTTGTGTGAATTACTCTTTTCCAGAGAAAGAAGTTATTTTTATTAGCT	VAVKMLKVTAPTPQLQAFKNEVGVLR*ACVNYSFPEKEVIFIS	2	3	1	1	0	3		19.2539	25.0488	8.42737	9.7878	0	27.0568		17.5767	12.2815		1.43115
TGAGGCAGTGAAAATGTTGAATGTGACAGCACCTACACCTCCAGTTACAAGCCTTCAAAAATGAAGTAGGAGTACTCAGGTGAGCTTGTGTGAATTACTCTTTTCCAGAGAAAGAAGTTATTTTTATTAGC	EAVKMLNVTAPTPPVTSLQK*SRSTQVSLCELLFSRERSYFY*	2	3	1	2	1	0		19.2539	25.0488	8.42737	19.5756	8.81943	0		17.5767	9.46501		1.85702
TGTGGCAGTGAAAATGTTGAATGTGACAGCACCACACCTCAGTTACAAGCCTTCAAAAATGAAGTAGGAGTACTCAGGTGAGCTTGTGTGAATTACTCTTTTCCAGAGAAAGAAGTTATTTTTATTAGCTC	VAVKMLNVTAPHLSYKPSKMK*EYSGELV*ITLFQRKKLFLLA	2	3	1	0	0	0		19.2539	25.0488	8.42737	0	0	0		17.5767	0		-1
TGTGGCAGTGAAAATGTTGAATGTGACAGCACCTACACCTCAGCAGTTACAAGCCTTCAAAAATGAAGTAGGAGTACTCAGGTGAGCTTGTGTGAATTACTCTTTTCCAGAGAAAGAGGTTATTTTTATTA	VAVKMLNVTAPTPQQLQAFKNEVGVLR*ACVNYSFPEKEVIFI	2	4	0	50	48	14		19.2539	33.3985	0	489.39	423.333	126.265		17.5508	346.329		0.0506766
TGTGGCAGTGAAAATGTTGAATGTGACAGCACCTACACCTCAGTTACAAGCCTTCAAAAATGAAGTAGGAGTACTCAGGTGAGCTTGTGTGAATTACAAGCCTTCAAAAATGAAGTAGGAGTACTCAGGTG	VAVKMLNVTAPTPQLQAFKNEVGVLR*ACVNYKPSKMK*EYSG	2	4	0	0	0	3		19.2539	33.3985	0	0	0	27.0568		17.5508	9.01892		1.946
TGTGGCAGTGAAAATGTTGAATGTGACAGCACCTACACCTCAAGTACTCAGGTGAGCTTGTGTGAATTACTCTTTTCCAGAGAAAGAAGTTATTTTTATTAGCTCCTGGTTCCCAGTGGACAGTGCAGGGG	VAVKMLNVTAPTPQVLR*ACVNYSFPEKEVIFISSWFPVDSAG	2	4	0	2	0	0		19.2539	33.3985	0	19.5756	0	0		17.5508	6.5252		2.68969
TGTGGCAGTGAAAATGTTGAATGTGACAGCACCTACACCTCAGCCGTTACAAGCCTTCAAAAATGAAGTAGGAGTACTCAGGTGAGCTTGTGTGAATTACTCTTTTCCAGAGAAAGAAGTTATTTTTATTA	VAVKMLNVTAPTPQPLQAFKNEVGVLR*ACVNYSFPEKEVIFI	1	0	5	7	6	2		9.62696	0	42.1368	68.5146	52.9166	18.0378		17.2546	46.4897		0.371149
TGTGGCAGTGAAAATGTTGAATGTGACAGCACAAAATGAAGTAGGAGTACTCAGGTGAGCTTGTGTGAATTACTCTTTTCCAGAGAAAGAAGTTATTTTTATTAGCTCCTGGTTCCCAGTGGACAGTGCAG	VAVKMLNVTAQNEVGVLR*ACVNYSFPEKEVIFISSWFPVDSA	1	0	5	1	0	6		9.62696	0	42.1368	9.7878	0	54.1135		17.2546	21.3004		0.810058
TGTGGCAGTGAAAATGTTGAATGTGACAGCACCTGTACCTCAGTTACAAGCCTTCAAAAATGAAGTAGGAGTACTCAGGTGAGCTTGTGTGAATTACTCTTTTCCAGAGAAAGAAGTTATTTTTATTAGCT	VAVKMLNVTAPVPQLQAFKNEVGVLR*ACVNYSFPEKEVIFIS	1	0	5	0	0	0		9.62696	0	42.1368	0	0	0		17.2546	0		-1
TGTGGCAGTGAAAATGTTGAATGTGACAGCGCCTACACCTCAGCAGTTACAAGCCTTCAAAAATGAAGTAGGAGTACTCAGGTGAGCTTGTGTGAATTACTCTTTTCCAGAGAAAGAAGTTATTTTTATTA	VAVKMLNVTAPTPQQLQAFKNEVGVLR*ACVNYSFPEKEVIFI	1	1	4	31	50	6		9.62696	8.34962	33.7095	303.422	440.972	54.1135		17.2287	266.169		0.0647284
TGTGGCAGTGAAAATGTTGAATGTGACAGCACCTACACCTCAGCCTTCAAAAATGAAGTAGGAGTACTCAGGTGAGCTTGTGTGAATTACTCTTTCCCAGAGAAAGAAGTTATTTTTATTAGCTCCTGGTT	VAVKMLNVTAPTPQPSKMK*EYSGELV*ITLSQRKKLFLLAPG	1	1	4	0	1	3		9.62696	8.34962	33.7095	0	8.81943	27.0568		17.2287	11.9587		1.44068
TGTGGCAGTGAAAATGTTGAATGTGACAGCACCTACACCTCAGTTACAAGCCTTCAAAAATGAAGTAGGAGTCCTCAGGTGAGCTTGTGTGAATTACTCTTTTCCAGAGAAAGAAGTTATTTTTATTAGCT	VAVKMLNVTAPTPQLQAFKNEVGVLR*ACVNYSFPEKEVIFIS	1	1	4	0	0	1		9.62696	8.34962	33.7095	0	0	9.01892		17.2287	3.00631		5.73085
TGTGGCAGTGAAAATGTTGAATGTGACAGCACCTACACCTCAGCAGTTACAAGCCTTCAAAAATGAAGTAGGAGTACTCAGGTGAGCTTGTGTGAATTACTCTTTTACAGAGAAAGAAGTTATTTTTATTA	VAVKMLNVTAPTPQQLQAFKNEVGVLR*ACVNYSFTEKEVIFI	1	2	3	33	40	14		9.62696	16.6992	25.2821	322.997	352.777	126.265		17.2028	267.347		0.0643463
TGTGGCAGTGAAAATGTTGAATGTGACAGCACCTACACCTCAGGTGTAGGAGTACTCAGGTGAGCTTGTGTGAATTACTCTTTTCCAGAGAAAGAAGTTATTTTTATTAGCTCCTGGTTCCCAGTGGACAG	VAVKMLNVTAPTPQV*EYSGELV*ITLFQRKKLFLLAPGSQWT	1	2	3	2	2	15		9.62696	16.6992	25.2821	19.5756	17.6389	135.284		17.2028	57.4994		0.299181
TGTGGCAGTGAAAATGTTGAATGTGACAGCACCTACACCTCAGGTTACAAGCCTTCAAAAATGAAATAGGAGTACTCAGGTGAGCTTGTGTGAATTACTCTTTTCCAGAGAAAGAAGTTATTTTTATTAGC	VAVKMLNVTAPTPQVTSLQK*NRSTQVSLCELLFSRERSYFY*	1	2	3	5	0	5		9.62696	16.6992	25.2821	48.939	0	45.0946		17.2028	31.3445		0.548828
TGTGGCAGTGAAAATGTTGAATGTGACAGCACCTACACCTCACAGTTACAAGCCTTCAAAAATGAAGTAGGAGTACTCAGGCGAGCTTGTGTGAATTACTCTTTTCCAGAGAAAGAAGTTATTTTTATTAG	VAVKMLNVTAPTPHSYKPSKMK*EYSGELV*ITLFQRKKLFLL	1	2	3	2	1	0		9.62696	16.6992	25.2821	19.5756	8.81943	0		17.2028	9.46501		1.81751
TGTGGCAGTGAAAATGTTGAATGTGACAGCACCTACACAGTTACAAGCCTTCAAAAATGAAGTAGGAGTACTCAGGTGAGCTTGTGTGAATTACTCTTTTCCAGAGAAAGAAGTTATTTTTATTGGCTCCT	VAVKMLNVTAPTQLQAFKNEVGVLR*ACVNYSFPEKEVIFIGS	1	2	3	0	0	0		9.62696	16.6992	25.2821	0	0	0		17.2028	0		-1
TGTGGCAGTGAAAATGTTGAATGTGACAGCACCTACACCTCAGCAGTTACAAGCCTTTAAAAATGAAGTAGGAGTACTCAGGTGAGCTTGTGTGAATTACTCTTTTCCAGAGAAAGAAGTTATTTTTATTA	VAVKMLNVTAPTPQQLQAFKNEVGVLR*ACVNYSFPEKEVIFI	1	3	2	5	20	2		9.62696	25.0488	16.8547	48.939	176.389	18.0378		17.1768	81.1218		0.211741
TGTGGCAGTGAAAATGTTGAATGTGACGGCACCTACACCTCCAGTTACAAGCCTTCAAAAATGAAGTAGGAGTACTCAGGTGAGCTTGTGTGAATTACTCTTTTCCAGAGAAAGAAGTTATTTTTATTAGC	VAVKMLNVTAPTPPVTSLQK*SRSTQVSLCELLFSRERSYFY*	1	3	2	2	3	10		9.62696	25.0488	16.8547	19.5756	26.4583	90.1892		17.1768	45.4077		0.37828
TGTGGCAGTGAAAATGTTGAATGTGACAGCACCTACACAAGCCTTCAAAAATGAAGTAGGAATACTCAGGTGAGCTTGTGTGAATTACTCTTTTCCAGAGAAAGAAGTTATTTTTATTAGCTCCTGGTTCC	VAVKMLNVTAPTQAFKNEVGILR*ACVNYSFPEKEVIFISSWF	1	3	2	4	1	3		9.62696	25.0488	16.8547	39.1512	8.81943	27.0568		17.1768	25.0091		0.686823
TGTGGCAGTGAAAATGTTGAATGTGACAGCACCTACACCTTCAAGTTACAAGCCTTCAAAAATGAAGTAGGAGTACTCAGGTGAGCTTGTGTGAATTACTCTTTTCCAGAGAAAGAAGTTATTTTTATTAG	VAVKMLNVTAPTPSSYKPSKMK*EYSGELV*ITLFQRKKLFLL	1	3	2	2	2	1		9.62696	25.0488	16.8547	19.5756	17.6389	9.01892		17.1768	15.4111		1.11457
TGTGGCAGTGAAAATGTTGAATGTGACAGCACCTACACCTCCAGTTACAAGCCTTCAAAAATGAAGTAGGAGTACTCAGGTGAGCTTGTGTGAATTACTCTTTTCCAGAGAAAGAAGTTACTTTTATTAGC	VAVKMLNVTAPTPPVTSLQK*SRSTQVSLCELLFSRERSYFY*	1	3	2	2	1	1		9.62696	25.0488	16.8547	19.5756	8.81943	9.01892		17.1768	12.4713		1.37731
TGTGGCAGTGAAAATGTTGAATGTGACAGCACCTACACCTCAGTTACAAGCCTTCAAAAATGAAGTAGGAGTACTCAGGTGAGCTTGTGTGAATTACGCTTTTCCAGAGAAAGAAGTTATTTTTATTAGCT	VAVKMLNVTAPTPQLQAFKNEVGVLR*ACVNYAFPEKEVIFIS	1	3	2	0	0	3		9.62696	25.0488	16.8547	0	0	27.0568		17.1768	9.01892		1.90453
TGTGGCAGTGAAAATGTTGAATGTGACAGCACCTACACCTCAGTTACAAGCCTTCAAAAATGAAGTAGGAGTACTCAGGTCAGCTTGTGTGAATTACTCTTTTCCAGAGAAAGAAGTTATTTTTATTAGCT	VAVKMLNVTAPTPQLQAFKNEVGVLRSACVNYSFPEKEVIFIS	1	3	2	0	0	0		9.62696	25.0488	16.8547	0	0	0		17.1768	0		-1
TGTGGCAGTGAAAATGTTGAATGTGACAGCACCTACACCTCAGCAGTTACAAGACTTCAAAAATGAAGTAGGAGTACTCAGGTGAGCTTGTGTGAATTACTCTTTTCCAGAGAAAGAAGTTATTTTTATTA	VAVKMLNVTAPTPQQLQDFKNEVGVLR*ACVNYSFPEKEVIFI	1	4	1	29	25	3		9.62696	33.3985	8.42737	283.846	220.486	27.0568		17.1509	177.13		0.096827
TGTGGCAGTGAAAATGTTGAATGTGACAGCACCTACACCTCAGCAGTTACAAGCATTCAAAAATGAAGTAGGAGTACTCAGGTGAGCTTGTGTGAATTACTCTTTTCCAGAGAAAGAAGTTATTTTTATTA	VAVKMLNVTAPTPQQLQAFKNEVGVLR*ACVNYSFPEKEVIFI	1	4	1	27	25	2		9.62696	33.3985	8.42737	264.271	220.486	18.0378		17.1509	167.598		0.102334
TGTGGCAGTGAAAATGTTGAATGTGACAGCACCTACACCTCCAGTTACAAGCCTTCAAAAATGAAGTAGGAGTACTCAGGTGGGCTTGTGTGAATTACTCTTTTCCAGAGAAAGAAGTTATTTTTATTAGC	VAVKMLNVTAPTPPVTSLQK*SRSTQVGLCELLFSRERSYFY*	1	4	1	3	1	4		9.62696	33.3985	8.42737	29.3634	8.81943	36.0757		17.1509	24.7528		0.692887
TGTGGCAGTGAAAATGTTGAATGTGACAGCACCTAGACCTCAGTTACAAGCCTTCAAAAATGAAGTAGGAGTACTCAGGTGAGCTTGTGTGAATTACTCTTTTCCAGAGAAAGAAGTTATTTTTATTAGCT	VAVKMLNVTAPRPQLQAFKNEVGVLR*ACVNYSFPEKEVIFIS	1	4	1	1	1	0		9.62696	33.3985	8.42737	9.7878	8.81943	0		17.1509	6.20241		2.7652
TGTGGCAGTGAAAATGTTGAATGTGACAGCACCTACACCTCACCTACACCTACAAGCCTTCAAAAATGAAGTAGGAGTACTCAGGTGAGCTTGTGTGAATTACTCTTTTCCAGAGAAAGAAGTTATTTTTA	VAVKMLNVTAPTPHLHLQAFKNEVGVLR*ACVNYSFPEKEVIF	1	4	1	0	0	2		9.62696	33.3985	8.42737	0	0	18.0378		17.1509	6.01261		2.85249
TGTGGCAGTGAAAATGTTGAATGTGACAGCACCTACACCTCAGTTACAAGCCTTCAAAAATGAAGTAGGAGTACGCAGGTGAGCTTGTGTGAATTACTCTTTTCCAGAGAAAGAAGTTATTTTTATTAGCT	VAVKMLNVTAPTPQLQAFKNEVGVRR*ACVNYSFPEKEVIFIS	1	4	1	0	0	1		9.62696	33.3985	8.42737	0	0	9.01892		17.1509	3.00631		5.70498
TGTGGCAGTGAAAATGTTGAATGTGACAGCACCTACAAGCCTTCAAAAATGAAGTAGGAGTACTCAGGTGAGCTTGTGTGAATTACTCTTTTCCAGAGAAAGAAGTTATTTTTATTAGCTCCTGGTTCCAG	VAVKMLNVTAPTSLQK*SRSTQVSLCELLFSRERSYFY*LLVP	1	5	0	1	0	3		9.62696	41.7481	0	9.7878	0	27.0568		17.125	12.2815		1.39437
TGTGGCAGTGAAAATGTTGAATGTGACAGGAGTACTCAGGTGAGCTTGTGTGAATTACTCTTTTCCAGAGAAAGAAGTTATTTTTATTAGCTCCTGGTTCCCAGTGGACAGTGCAGGGGAAAGAATAGTAG	VAVKMLNVTGVLR*ACVNYSFPEKEVIFISSWFPVDSAGERIV	0	0	6	2	6	16		0	0	50.5642	19.5756	52.9166	144.303		16.8547	72.265		0.233235
TGTGGCAGTGAAAATGTTGAATGTGACAGCACCTACACCTCAGGACAGTTACAAGCCTTCAAAAATGAAGTAGGAGTACTCAGGTGAGCTTGTGTGAATTACTCTTTTCCAGAGAAAGAAGTTATTTTTAT	VAVKMLNVTAPTPQDSYKPSKMK*EYSGELV*ITLFQRKKLFL	0	0	6	3	2	18		0	0	50.5642	29.3634	17.6389	162.341		16.8547	69.781		0.241538
TGTGGCAGTGAAAATGTTGAATGTGACAGCACCTACACCTCAGCCTTCAAAAATGAAGTAGGAATACTCAGGTGAGCTTGTGTGAATTACTCTTTTCCAGAGAAAGAAGTTATTTTTATTAGCTCCTGGTT	VAVKMLNVTAPTPQPSKMK*EYSGELV*ITLFQRKKLFLLAPG	0	0	6	2	1	14		0	0	50.5642	19.5756	8.81943	126.265		16.8547	51.5533		0.326938
TGTGGCAGTGAAAATGTTGAATGTGACAGCACCTACACCTCAGCAAAGTTACAAGCCTTCAAAAATGAAGTAGGAGTACTCAGGTGAGCTTGTGTGAATTACTCTTTTCCAGAGAAAGAAGTTATTTTTAT	VAVKMLNVTAPTPQQSYKPSKMK*EYSGELV*ITLFQRKKLFL	0	0	6	2	4	5		0	0	50.5642	19.5756	35.2777	45.0946		16.8547	33.316		0.505906
TGTGGCAGTGAAAATGTTGAATGTGTAACAAGCCTTCAAAAATGAAGTAGGAGTACTCAGGTGAGCTTGTGTGAATTACTCTTTTCCAGAGAAAGAAGTTATTTTTATTAGCTCCTGGTTCCCAGTGGACA	VAVKMLNV*QAFKNEVGVLR*ACVNYSFPEKEVIFISSWFPVD	0	0	6	0	0	6		0	0	50.5642	0	0	54.1135		16.8547	18.0378		0.93441
TGTGGCAGTGAAATGTTGAATGTGACAGCACCTACACCTCAGCCTTCAAAAATGAAGTAGGAGTACTCAGGTGAGCTTGTGTGAATTACTCTTTTCCAGAGAAAGAAGTTATTTTTATTAGCTCCTGGTTC	VAVKC*M*QHLHLSLQK*SRSTQVSLCELLFSRERSYFY*LLV	0	0	6	2	1	2		0	0	50.5642	19.5756	8.81943	18.0378		16.8547	15.4776		1.08897
TGTGGCAGTGAAAATGTTGAATGTGACAGCACCTACACCTAACTGAGGTTACAAGCCTTCAAAAATGAAGTAGGAGTACTCAGGTGAGCTTGTGTGAATTACTCTTTTCCAGAGAAAGAAGTTATTTTTAT	VAVKMLNVTAPTPN*GYKPSKMK*EYSGELV*ITLFQRKKLFL	0	0	6	0	0	1		0	0	50.5642	0	0	9.01892		16.8547	3.00631		5.60646
TGTGGCAGTGAAAATGTTGAATGTGACAGCACCTACACCTCAGATACAAAGCCTTCAAAAATGAAGTAGGAGTACTCAGGTGAGCTTGTGTGAATTACTCTTTTCCAGAGAAAGAAGTTATTTTTATTAGC	VAVKMLNVTAPTPQIQSLQK*SRSTQVSLCELLFSRERSYFY*	0	0	6	0	0	1		0	0	50.5642	0	0	9.01892		16.8547	3.00631		5.60646
TGTGGCAGTGAAAATGTTGAATGTGACAGCACCTACACCTCAGAGGTTACAAGCCTTCAAAAATGAAGTAGGAGTACTCAGGTGAGCTTGTGTGAATTACTCTTTTCCAGAGAAAGAAGTTATTTTTATTA	VAVKMLNVTAPTPQRLQAFKNEVGVLR*ACVNYSFPEKEVIFI	0	0	6	0	0	0		0	0	50.5642	0	0	0		16.8547	0		-1
TGTGGCAGTGAAAATGTTGTAACAAGCCTTCAAAAATGAAGTAGGAGTACTCAGGTGAGCTTGTGTGAATTACTCTTTTCCAGAGAAAGAAGTTATTTTTATTAGCTCCTGGTTCCCAGTGGACAGTGCAG	VAVKML*QAFKNEVGVLR*ACVNYSFPEKEVIFISSWFPVDSA	0	0	6	0	0	0		0	0	50.5642	0	0	0		16.8547	0		-1
TGTGGCAGTGAAAATGTTGAATGTGACAGCACCTACACCTCAGAAATGTAGTAGGAGTACTCAGGTGAGCTTGTGTGAATTACTCTTTTCCAGAGAAAGAAGTTATTTTTATTAGCTCCTGGTTCCCAGTG	VAVKMLNVTAPTPQKCSRSTQVSLCELLFSRERSYFY*LLVPS	0	0	6	0	0	0		0	0	50.5642	0	0	0		16.8547	0		-1
TGTGGCAGTGAAAATGTTGAATGTGACAGCACCTACACCTCAAAATTTAAAAGTAGGAGTACTCAGGTGAGCTTGTGTGAATTACTCTTTTCCAGAGAAAGAAGTTATTTTTATTAGCTCCTGGTTCCCAG	VAVKMLNVTAPTPQNLKVGVLR*ACVNYSFPEKEVIFISSWFP	0	0	6	0	0	0		0	0	50.5642	0	0	0		16.8547	0		-1
TGTGGCAGTGAAAATGTTGAATGTGACAGCACCTACAACTACAAGCCTTCAAAAATGAAGTAGGAGTACTCAGGTGAGCTTGTGTGAATTACTCTTTTCCAGAGAAAGAAGTTATTTTTATTAGCTCCTGG	VAVKMLNVTAPTTTSLQK*SRSTQVSLCELLFSRERSYFY*LL	0	0	6	0	0	0		0	0	50.5642	0	0	0		16.8547	0		-1
TGTGGCAGTGAAAATGTTGAATGTGACAGCACCTACACCTCAGCTACAGTTACAAGCCTTCAAAAATGAAGTAGGAGTACTCAGGTGAGCTTGTGTGAATTACTCTTTTCCAGAGAAAGAAGTTATTTTTA	VAVKMLNVTAPTPQLQLQAFKNEVGVLR*ACVNYSFPEKEVIF	0	0	6	0	0	0		0	0	50.5642	0	0	0		16.8547	0		-1
TGTGGCAGTGAAAATGTTGAATGTGACAGCACCTACACCTTGTAACATTTTTGAAGTTACAAGCCTTCAAAAATGAAGTAGGAGTACTCAGGTGAGCTTGTGTGAATTACTCTTTTCCAGAGAAAGAAGTT	VAVKMLNVTAPTPCNIFEVTSLQK*SRSTQVSLCELLFSRERS	0	0	6	0	0	0		0	0	50.5642	0	0	0		16.8547	0		-1
TGTGGCAGTGAAAATGTTGAATGTGACAGCACCTACACCTCAAGCTTGTAACAAGCCTTCAAAAATGAAGTAGGAGTACTCAGGTGAGCTTGTGTGAATTACTCTTTTCCAGAGAAAGAAGTTATTTTTAT	VAVKMLNVTAPTPQACNKPSKMK*EYSGELV*ITLFQRKKLFL	0	0	6	0	0	0		0	0	50.5642	0	0	0		16.8547	0		-1
TGTGGCAGTGAAAATGTTGAATGTGACAGCACCTACACCTCAGCAGTTACAAGCCAAAATGAAGTAGGAGTACTCAGGTGAGCTTGTGTGAATTACTCTTTTCCAGAGAAAGAAGTTATTTTTATTAGCTC	VAVKMLNVTAPTPQQLQAKMK*EYSGELV*ITLFQRKKLFLLA	0	0	6	0	0	0		0	0	50.5642	0	0	0		16.8547	0		-1
TGTGGCAGTGAAAATGTTGAAATTTTGAAGTTACAAGCCTTCAAAAATGAAGTAGGAGTACTCAGGTGAGCTTGTGTGAATTACTCTTTTCCAGAGAAAGAAGTTATTTTTATTAGCTCCTGGTTCCCAGT	VAVKMLKF*SYKPSKMK*EYSGELV*ITLFQRKKLFLLAPGSQ	0	0	6	0	0	0		0	0	50.5642	0	0	0		16.8547	0		-1
TGTGGCAGTGAAAATGTTGAATGTGACAGCACCTACACCTCCTTACAAAATGAAGTTACAAGCCTTCAAAAATGAAGTAGGAGTACTCAGGTGAGCTTGTGTGAATTACTCTTTTCCAGAGAAAGAAGTTA	VAVKMLNVTAPTPPYKMKLQAFKNEVGVLR*ACVNYSFPEKEV	0	0	6	0	0	0		0	0	50.5642	0	0	0		16.8547	0		-1
TGTGGCAGTGAAAATGTTGAATGTGACAGCAGAAGTTATTTTTATTAGCTCCTGGTTCCCAGTGGACAGTGCAGGGGAAAGAATAGTAGAAGATCGGAAGAGCACACGTCTGAACTCCAGTCACAAGATGC	VAVKMLNVTAEVIFISSWFPVDSAGERIVEDRKSTRLNSSHKM	0	0	6	0	0	0		0	0	50.5642	0	0	0		16.8547	0		-1
TGTGGCAGTGAAAATGTTGAATGTGACAGCACCTACACCTTTTTATTAGCTCCTGGTTCCCAGTGGACAGTGCAGGGGAAAGAATAGTAGAAGATCGGAAGAGCACACGTCTGAACTCCAGTCACTTGAAC	VAVKMLNVTAPTPFY*LLVPSGQCRGKNSRRSEEHTSELQSLE	0	0	6	0	0	0		0	0	50.5642	0	0	0		16.8547	0		-1
TGTGGCAGTGAAAATGTTGAATGTGACAGCACCTACACCTTGTAGGTTACAAGCCTTCAAAAATGAAGTAGGAGTACTCAGGTGAGCTTGTGTGAATTACTCTTTTCCAGAGAAAGAAGTTATTTTTATTA	VAVKMLNVTAPTPCRLQAFKNEVGVLR*ACVNYSFPEKEVIFI	0	0	6	0	0	0		0	0	50.5642	0	0	0		16.8547	0		-1
TGTGGCAGTGAAAATGTTGAATGTGACAGCACCTACACCTCATGAAGTACTCAGGTGAGCTTGTGTGAATTACTCTTTTCCAGAGAAAGAAGTTATTTTTATTAGCTCCTGGTTCCCAGTGGACAGTGCAG	VAVKMLNVTAPTPHEVLR*ACVNYSFPEKEVIFISSWFPVDSA	0	0	6	0	0	0		0	0	50.5642	0	0	0		16.8547	0		-1
TGTGGCAGTGAAAATGTTGAATGTGACAGCACCTACACCTCAGTTTAACATCCCTAATCCAAACATATGAAATCCTCCAATAAGCATTTCCTTTGAGCATCATGTCAGTTACAAGCCTTCAAAAATGAAGT	VAVKMLNVTAPTPQFNIPNPNI*NPPISISFEHHVSYKPSKMK	0	0	6	0	0	0		0	0	50.5642	0	0	0		16.8547	0		-1
TGTGGCAGTGAAAATGTTGAATGTGACAGCACCTACACCTCAGTTAGGAGGAGCACCTACACCTCAGTTAGGAGGTAACTTTCAATTAGGAAAGTTACAAGCCTTCAAAAATGAAGTAGGAGTACTCAGGT	VAVKMLNVTAPTPQLGGAPTPQLGGNFQLGKLQAFKNEVGVLR	0	0	6	0	0	0		0	0	50.5642	0	0	0		16.8547	0		-1
TGTGGCAGTGAAAATGTTGAATGTGACAGCACCTACACCTCAGGTCACTACTGAAGTAGGAGTACTCAGGTGAGCTTGTGTGAATTACTCTTTTCCAGAGAAAGAAGTTATTTTTATTAGCTCCTGGTTCC	VAVKMLNVTAPTPQVTTEVGVLR*ACVNYSFPEKEVIFISSWF	0	0	6	0	0	0		0	0	50.5642	0	0	0		16.8547	0		-1
TGTGGCAGTGAAAATGTTGAATGTGACAGCACCTACACCTCAGGCACCTTCAAAATGAAGGTTACAAGCCTTCAGTTACAAGCCTTCAAAAATGAAGTAGGAGTACTCAGGTGAGCTTGTGTGAATTACTC	VAVKMLNVTAPTPQAPSK*RLQAFSYKPSKMK*EYSGELV*IT	0	0	6	0	0	0		0	0	50.5642	0	0	0		16.8547	0		-1
TGTGGCAGTGAAAATGTTGAATGTGACAGCACCTACACCTCAAAATGTAGCACCTACAATGCTACACCTGTAGGTGCTACAAGCCTTCAAAAATGAAGTAGGAGTACTCAGGTGAGCTTGTGTGAATTACT	VAVKMLNVTAPTPQNVAPTMLHL*VLQAFKNEVGVLR*ACVNY	0	0	6	0	0	0		0	0	50.5642	0	0	0		16.8547	0		-1
TGTGGCAGTGAAAATGTTGAATGTGACAGCACCTACACATTTAGTTACAAGCCTTCAAAAATGAAGTAGGAGTACTCAGGTGAGCTTGTGTGAATTACTCTTTTCCAGAGAAAGAAGTTATTTTTATTAGC	VAVKMLNVTAPTHLVTSLQK*SRSTQVSLCELLFSRERSYFY*	0	0	6	0	0	0		0	0	50.5642	0	0	0		16.8547	0		-1
TGTGGCAGTGAAAATGTTGAATGTGACAGCACCTACACCTCAGCACAGTTACAAGCCTTCAAAAGTGAAGTAGGAGTACTCAGGTGAGCTTGTGTGAATTACTCTTTTCCAGAGAAAGAAGTTATTTTTAT	VAVKMLNVTAPTPQHSYKPSKVK*EYSGELV*ITLFQRKKLFL	0	1	5	7	6	10		0	8.34962	42.1368	68.5146	52.9166	90.1892		16.8288	70.5401		0.238571
TGTGGCAGTGAAAATGTTGAATGTGACAAGCCTTCAAAATGAAGTAGGAGTACTCAGGTGAGCTTGTGTGAATTACTCTTTTCCAGAGAAAGAAGTTATTTTTATTAGCTCCTGGTTCCCAGTGGACAGTG	VAVKMLNVTSLQNEVGVLR*ACVNYSFPEKEVIFISSWFPVDS	0	1	5	1	6	12		0	8.34962	42.1368	9.7878	52.9166	108.227		16.8288	56.9771		0.295361
TGTGGCAGTGAAAATGTTGAATGTGACAGCACCTACACCTCAGCAGTTTACAAGCCTTCAAAAATGAAGTAGGAGTACTCAGGTGAGCTTGTGTGAATTACTCTTTTCCAGAGAAAGAAGTTATTTTTATT	VAVKMLNVTAPTPQQFTSLQK*SRSTQVSLCELLFSRERSYFY	0	1	5	3	3	5		0	8.34962	42.1368	29.3634	26.4583	45.0946		16.8288	33.6388		0.500281
TGTGGCAGTGAAAATGTTGAATGTGACAGCACCTACACCTCAGCACAGTTACAAGCCTTCAGAAATGAAGTAGGAGTACTCAGGTGAGCTTGTGTGAATTACTCTTTTCCAGAGAAAGAAGTTATTTTTAT	VAVKMLNVTAPTPQHSYKPSEMK*EYSGELV*ITLFQRKKLFL	0	2	4	3	7	10		0	16.6992	33.7095	29.3634	61.736	90.1892		16.8029	60.4295		0.278058
TGTGGCAGTGAAAATGTTGAATGTGACAGCACCTACACCTCAGCAAGTTACAAGCCTTCGAAAATGAAGTAGGAGTACTCAGGTGAGCTTGTGTGAATTACTCTTTTCCAGAGAAAGAAGTTATTTTTATT	VAVKMLNVTAPTPQQVTSLRK*SRSTQVSLCELLFSRERSYFY	0	2	4	5	0	4		0	16.6992	33.7095	48.939	0	36.0757		16.8029	28.3382		0.592941
TGTGGCAGTGAAAATGTTGAATGTGACAGCACCTACACCTCAGAAAAATGAAGTAGGAGTACTCAGGTGAGCTTGTGTGAATTACTCTTTTCCAGAGAAAGAAGTTATTTTTATTAGCTCCTGGTTCCCAG	VAVKMLNVTAPTPQKNEVGVLR*ACVNYSFPEKEVIFISSWFP	0	3	3	7	1	28		0	25.0488	25.2821	68.5146	8.81943	252.53		16.777	109.955		0.152581
TGTGGCAGTGAAAATGTTGAATGTGACAGCACCTACACCTCAGCCAGTTACAAGCCTTCAAAAGTGAAGTAGGAGTACTCAGGTGAGCTTGTGTGAATTACTCTTTTCCAGAGAAAGAAGTTATTTTTATT	VAVKMLNVTAPTPQPVTSLQK*SRSTQVSLCELLFSRERSYFY	0	3	3	4	4	10		0	25.0488	25.2821	39.1512	35.2777	90.1892		16.777	54.8727		0.305744
TGTGGCAGTGAAAATGTTGAATGTGACAGCACCTACACCAGTTACAAGCCTTCAAAAATGAAATAGGAGTACTCAGGTGAGCTTGTGTGAATTACTCTTTTCCAGAGAAAGAAGTTATTTTTATTAGCTCC	VAVKMLNVTAPTPVTSLQK*NRSTQVSLCELLFSRERSYFY*L	0	3	3	6	2	9		0	25.0488	25.2821	58.7268	17.6389	81.1703		16.777	52.512		0.319489
TGTGGCAGTGAAAATGTTGAATGTGACAGCACCTACACCTAGGAGTACTCAGGTGAGCTTGTGTGAATTACTCTTTTCCAGAGAAAGAAGTTATTTTTATTAGCTCCTGGTTCCCAGTGGACAGTGCAGGG	VAVKMLNVTAPTPRSTQVSLCELLFSRERSYFY*LLVPSGQCR	0	3	3	6	0	2		0	25.0488	25.2821	58.7268	0	18.0378		16.777	25.5882		0.655653
TGTGGCAGTGAAAATGTTGAATGTGACAGCACCTACAAGCCTTCAAAAATGAAGTAGGAGTACTCAGGTGAGCTTGTGTGAATTACTCTTTTCCAGAGAAAGAAGTTATTTTATTAGCTCCTGGTTCCCAG	VAVKMLNVTAPTSLQK*SRSTQVSLCELLFSRERSYFISSWFP	0	3	3	2	1	2		0	25.0488	25.2821	19.5756	8.81943	18.0378		16.777	15.4776		1.08395
TGTGGCAGTGAAAATGTTGAATGTGACAGCACCTACACCTCACATTTTGAAGTTACAAGCCTTCAAAAATGAAGTAGGAGTACTCAGGTGAGCTTGTGTGAATTACTCTTTTCCAGAGAAAGAAGTTATTT	VAVKMLNVTAPTPHILKLQAFKNEVGVLR*ACVNYSFPEKEVI	0	3	3	0	1	4		0	25.0488	25.2821	0	8.81943	36.0757		16.777	14.965		1.12108
TGTGGCAGTGAAAATGTTGAATGTGACAGCACCTACACCCCAGTTACAAGCCTTCAAAAATGAAATAGGAGTACTCAGGTGAGCTTGTGTGAATTACTCTTTTCCAGAGAAAGAAGTTATTTTTATTAGCT	VAVKMLNVTAPTPQLQAFKNEIGVLR*ACVNYSFPEKEVIFIS	0	3	3	1	0	0		0	25.0488	25.2821	9.7878	0	0		16.777	3.2626		5.14221
TGTGGCAGTGAAAATGTTGAATGTGACAGCACCTACACAGTTACAAGCCTTCAAAAATGAAGTAGGAGTACTCAGGTGAGCTTGTGTGAATTACTCTTTTCCAGAGAAAGAAGTTATTTTTATTAGTTCCT	VAVKMLNVTAPTQLQAFKNEVGVLR*ACVNYSFPEKEVIFISS	0	3	3	0	0	0		0	25.0488	25.2821	0	0	0		16.777	0		-1
TGTGGCAGTGAAAATGTTGAATGTGACAGCACCTACACGTTACAAGCCTTCAAAAATGAAGTAGGAGTACTCAGGTGAGCTTGTGTGAATTACTCTTTTCCAGAGAAAGAAGTTATTTTTATTAGCTCCTG	VAVKMLNVTAPTRYKPSKMK*EYSGELV*ITLFQRKKLFLLAP	0	4	2	6	6	27		0	33.3985	16.8547	58.7268	52.9166	243.511		16.7511	118.385		0.141497
TGTGGCAGTGAAAATGTTGAATGTGACAGCACCTACACCTCCAGTTACAAGCCTTCAAAAATGAAGTAGGAGTACTCAGGTGAGCTTGTGCGAATTACTCTTTTCCAGAGAAAGAAGTTATTTTTATTAGC	VAVKMLNVTAPTPPVTSLQK*SRSTQVSLCELLFSRERSYFY*	0	4	2	8	2	6		0	33.3985	16.8547	78.3024	17.6389	54.1135		16.7511	50.0183		0.334899
TGTGGCAGTGAAAATGTTGAATGTGACAGCACCTACACTTCAAAATGAAGTAGGAGTACTCAGGTGAGCTTGTGTGAATTACTCTTTTCCAGAGAAAGAAGTTATTTTTATTAGCTCCTGGTTCCCAGTGG	VAVKMLNVTAPTLQNEVGVLR*ACVNYSFPEKEVIFISSWFPV	0	4	2	2	4	8		0	33.3985	16.8547	19.5756	35.2777	72.1514		16.7511	42.3349		0.39568
TGTGGCAGTGAAAATGTTGAATGTGACAGCACCTACACCTCAGCCTTCAAAATTTTACAAGCCTTCAAAAATGAAGTAGGAGTACTCAGGTGAGCTTGTGTGAATTACTCTTTTCCAGAGAAAGAAGTTAT	VAVKMLNVTAPTPQPSKFYKPSKMK*EYSGELV*ITLFQRKKL	0	4	2	2	6	0		0	33.3985	16.8547	19.5756	52.9166	0		16.7511	24.1641		0.693222
TGTGGCAGTGAAAATGTTGAATGTGACAGCACCTACACCTCAGCAAACAAGCCTTCAAAAATGAAGTAGGAGTACTCAGGTGAGCTTGTGTGAATTACTCTTTTCCAGAGAAAGAAGTTATTTTTATTAGC	VAVKMLNVTAPTPQQTSLQK*SRSTQVSLCELLFSRERSYFY*	0	4	2	0	3	0		0	33.3985	16.8547	0	26.4583	0		16.7511	8.81943		1.89934
TCTGGCAGTGAAAATGTTGAATGTGACAGCACCTACACCTCAGTTACAAGCCTTCAAAAATGAAGTAGGAGTACTCAGGTGAGCTTGTGTGAATTACTCTTTTCCAGAGAAAGAAGTTATTTTTATTAGCT	LAVKMLNVTAPTPQLQAFKNEVGVLR*ACVNYSFPEKEVIFIS	0	4	2	0	1	0		0	33.3985	16.8547	0	8.81943	0		16.7511	2.93981		5.69801
TGTGGCAGTGAAAATGTTGAATGTGACAGCACCTATACAGTTACAAGCCTTCAAAAATGAAGTAGGAGTACTCAGGTGAGCTTGTGTGAATTACTCTTTTCCAGAGAAAGAAGTTATTTTTATTAGCTCCT	VAVKMLNVTAPIQLQAFKNEVGVLR*ACVNYSFPEKEVIFISS	0	5	1	1	0	1		0	41.7481	8.42737	9.7878	0	9.01892		16.7251	6.26891		2.66795
TGTGGCAGTGAAAATGTTGAATGTGACAGCACCTACACCTTCAAAAATGAAGTAGGAGTACTCAGGTGAGCTTGTGTGAATTACTCTTTTCCAGAGAAAGAAGTTATTTTATTAGCTCCTGGTTCCCAGTG	VAVKMLNVTAPTPSKMK*EYSGELV*ITLFQRKKLFY*LLVPS	0	5	1	0	0	0		0	41.7481	8.42737	0	0	0		16.7251	0		-1
TGTGGCAGTGAAAATGTTGAATGTGACAGCACCCTTCAAAAATGAAGTAGGAGTACTCAGGTGAGCTTGTGTGAATTACTCTTTTCCAGAGAAAGAAGTTATTTTTATTAGCTCCTGGTTCCCAGTGGACA	VAVKMLNVTAPFKNEVGVLR*ACVNYSFPEKEVIFISSWFPVD	0	6	0	2	6	8		0	50.0977	0	19.5756	52.9166	72.1514		16.6992	48.2145		0.346353
TGTGGCAGTGAAAATGTTGAATGTGACAGCACCTACACCTCAGGTGTACTCAGGTGAGCTTGTGTGAATTACTCTTTTCCAGAGAAAGAAGTTATTTTTATTAGCTCCTGGTTCCCAGTGGACAGTGCAGG	VAVKMLNVTAPTPQVYSGELV*ITLFQRKKLFLLAPGSQWTVQ	0	6	0	7	2	6		0	50.0977	0	68.5146	17.6389	54.1135		16.6992	46.7557		0.35716
TGTGGCAGTGAAAATGTTGAATGTGACAGCACCTACACCTTCAAAAATGAAGTACAAGCCTTCAAAAATGAAGTAGGAGTACTCAGGTGAGCTTGTGTGAATTACTCTTTTCCAGAGAAAGAAGTTATTTT	VAVKMLNVTAPTPSKMKYKPSKMK*EYSGELV*ITLFQRKKLF	0	6	0	2	0	4		0	50.0977	0	19.5756	0	36.0757		16.6992	18.5504		0.900207
TGTGGCAGTGAAAATGTTGAATGTGTAGGTGCTGTCACAAGCTTGTAACACAAGCCTTCAAAAATGAAGTAGGAGTACTCAGGTGAGCTTGTGTGAATTACTCTTTTCCAGAGAAAGAAGTTATTTTTATT	VAVKMLNV*VLSQACNTSLQK*SRSTQVSLCELLFSRERSYFY	0	6	0	0	6	0		0	50.0977	0	0	52.9166	0		16.6992	17.6389		0.946729
TGTGGCAGTGAAAATGTTGAATGTGACAGCTCAAAAATGAAGTAGGAGTACTCAGGTGAGCTTGTGTGAATTACTCTTTTCCAGAGAAAGAAGTTATTTTTATTAGCTCCTGGTTCCCAGTGGACAGTGCA	VAVKMLNVTAQK*SRSTQVSLCELLFSRERSYFY*LLVPSGQC	0	6	0	0	2	3		0	50.0977	0	0	17.6389	27.0568		16.6992	14.8985		1.12086
TGTGGCAGTGAAAATGTTGAATGTGACAGCACCTACACCTTCAAAAATGAAGTAGGAGTACTCAGGTGAGCTTGTGTGAATTACTCTTTTCCAGAGAAAGAAATTATTTTTATTAGCTCCTGGTTCCCAGT	VAVKMLNVTAPTPSKMK*EYSGELV*ITLFQRKKLFLLAPGSQ	0	6	0	2	0	1		0	50.0977	0	19.5756	0	9.01892		16.6992	9.53151		1.752
TGTGGCAGTGAAAATGTTGAATGTTGAATGTGACAGCACCTACACCTCAGCCTTCAAAAATGAAGTAGGAGTACTCAGGTGAGCTTGTGTGAATTACTCTTTTCCAGAGAAAGAAGTTATTTTTATTAGCT	VAVKMLNVECDSTYTSAFKNEVGVLR*ACVNYSFPEKEVIFIS	0	6	0	1	0	1		0	50.0977	0	9.7878	0	9.01892		16.6992	6.26891		2.66382
TGTGGCAGTACAAGCCTTCAAAAATGAAGTAGGAGTACTCAGGTGAGCTTGTGTGAATTACTCTTTTCCAGAGAAAGAAGTTATTTTTATTAGCTCCTGGTTCCCAGTGGACAGTGCAGGGGAAAGAATAG	VAVQAFKNEVGVLR*ACVNYSFPEKEVIFISSWFPVDSAGERI	0	6	0	1	0	0		0	50.0977	0	9.7878	0	0		16.6992	3.2626		5.11838
TGTGGCAGTGAAAATGTTGAATGTGACAGCACCTACACCTCAGTGCAAGCCTTCAAAAATGAAGTAGGAGTACTCAGGTGAGCTTGTGTGAATTACTCTTTTCCAGAGAAAGAAGTTATTTTTATTAGCTC	VAVKMLNVTAPTPQCKPSKMK*EYSGELV*ITLFQRKKLFLLA	0	6	0	0	0	1		0	50.0977	0	0	0	9.01892		16.6992	3.00631		5.55473
TGTGGCAGTGAAAATGTTGAATGTGACAGCACCTACACCTCAAACTGAGTTACAAGCCTTCAAAAATGAAGTAGGAGTACTCAGGTGAGCTTGTGTGAATTACTCTTTTCCAGAGAAAGAAGTTATTTTTA	VAVKMLNVTAPTPQTELQAFKNEVGVLR*ACVNYSFPEKEVIF	0	6	0	0	0	1		0	50.0977	0	0	0	9.01892		16.6992	3.00631		5.55473
TGTGGCAGTGAAAATGTTGAATGTGACAGCACCTTCAAAATGTTACAAGCCTTCAAAAATGAAGTAGGAGTACTCAGGTGAGCTTGTGTGAATTACTCTTTTCCAGAGAAAGAAGTTATTTTTATTAGCTC	VAVKMLNVTAPSKCYKPSKMK*EYSGELV*ITLFQRKKLFLLA	0	6	0	0	0	0		0	50.0977	0	0	0	0		16.6992	0		-1
TGTGGCAGTGAAAATGTTGAATGTGACAGCACCTACACATTTACACAGTTACAAGCCTTCAAAAATGAAGTAGGAGTACTCAGGTGAGCTTGTGTGAATTACTCTTTTCCAGAGAAAGAAGTTATTTTTAT	VAVKMLNVTAPTHLHSYKPSKMK*EYSGELV*ITLFQRKKLFL	0	6	0	0	0	0		0	50.0977	0	0	0	0		16.6992	0		-1
TGTGGCAGTGAAAATGTTGAATGTGACAGCACCTACACCTCTCTCTTTTCCAGAGAAAGAAGTTATTTTTATTAGCTCCTGGTTCCCAGTGGACAGTGCAGGGGAAAGAATAGTAGAAGATCGGAAGAGCA	VAVKMLNVTAPTPLSFPEKEVIFISSWFPVDSAGERIVEDRKS	0	6	0	0	0	0		0	50.0977	0	0	0	0		16.6992	0		-1
TGTGGCAGTGAAAATGTTGAATGTGACAGCATTCAAAATGTTACAAGCCTTCAAAAATGAAGTAGGAGTACTCAGGTGAGCTTGTGTGAATTACTCTTTTCCAGAGAAAGAAGTTATTTTTATTAGCTCCT	VAVKMLNVTAFKMLQAFKNEVGVLR*ACVNYSFPEKEVIFISS	0	6	0	0	0	0		0	50.0977	0	0	0	0		16.6992	0		-1
TGTGGCAGTGAAAATGTTGAATGTGACAGCACCTACACCTCAAACACTACAAGCCAGCACTACAAGCACTACAAGACAGCACTACAAGCCTTCAAAAATGAAGTAGGAGTACTCAGGTGAGCTTGTGTGAA	VAVKMLNVTAPTPQTLQASTTSTTRQHYKPSKMK*EYSGELV*	0	6	0	0	0	0		0	50.0977	0	0	0	0		16.6992	0		-1
TGTGGCAGTGAAAATGTTGAATGTGTAGGTTACACCTACACCTACAAGCCTTCAAAAATGAAGTAGGAGTACTCAGGTGAGCTTGTGTGAATTACTCTTTTCCAGAGAAAGAAGTTATTTTTATTAGCTCC	VAVKMLNV*VTPTPTSLQK*SRSTQVSLCELLFSRERSYFY*L	0	6	0	0	0	0		0	50.0977	0	0	0	0		16.6992	0		-1
TGTGGCAAGCCTTTTGAGGTGTAGGTGCTGTCACATTCAACATTTTCACTGCCATGTCAATGTTTCTAAAATTCCAGAGCCCAGGACTAAATACCACCTCTAAATGTATTCTGATAAGCCTTCAAAAATGA	VASLLRCRCCHIQHFHCHVNVSKIPEPRTKYHL*MYSDKPSKM	0	6	0	0	0	0		0	50.0977	0	0	0	0		16.6992	0		-1
TGTGGCAGTGAAAATGTTGAATGTGACAGCACCTACACCTCACCTATTTTTATTAGCTCCTGGTTCCCAGTGGACAGTGCAGGGGAAAGAATAGTAGAAGATCGGAAGAGCACACGTCTGAACTCCAGTCA	VAVKMLNVTAPTPHLFLLAPGSQWTVQGKE**KIGRAHV*TPV	0	6	0	0	0	0		0	50.0977	0	0	0	0		16.6992	0		-1
TGTGGCAGTGAAAATGTTGAATGTGACAGCACCTACACCTTCAAAACTGAGGTTACAAGCCTTCAAAAATGAAGTAGGAGTACTCAGGTGAGCTTGTGTGAATTACTCTTTTCCAGAGAAAGAAGTTATTT	VAVKMLNVTAPTPSKLRLQAFKNEVGVLR*ACVNYSFPEKEVI	0	6	0	0	0	0		0	50.0977	0	0	0	0		16.6992	0		-1
TGTGGCAGTGAAAATGTTGAATGTGACAGCACCTACACCTTCAAAAATGAAGTACCTACACCTTCAAAAATGAAGCACCTACACCTTCAAAAATGAAGTAGGAGTACTCAGGTGAGCTTGTGTGAATTACT	VAVKMLNVTAPTPSKMKYLHLQK*STYTFKNEVGVLR*ACVNY	0	6	0	0	0	0		0	50.0977	0	0	0	0		16.6992	0		-1
TGTGGCAGTGAAAATGTTGAATGTGACAGCACCTACACCTTATTAGCTCCTGGTTCCCAGTGGACAGTGCAGGGGAAAGAATAGTAGAAGATCGGAAGAGCACACGTCTGAACTCCAGTCACGGTCCATAA	VAVKMLNVTAPTPY*LLVPSGQCRGKNSRRSEEHTSELQSRSI	0	6	0	0	0	0		0	50.0977	0	0	0	0		16.6992	0		-1
TGTGGCAGTGAAAATGTTGAATGTGACAGCACCTACACCTCTGTAGGTGTTACAAGCCTTCAAAAATGAAGTAGGAGTACTCAGGTGAGCTTGTGTGAATTACTCTTTTCCAGAGAAAGAAGTTATTTTTA	VAVKMLNVTAPTPL*VLQAFKNEVGVLR*ACVNYSFPEKEVIF	0	6	0	0	0	0		0	50.0977	0	0	0	0		16.6992	0		-1
TGTGGCAGTGAAAATGTTGAATGTGACAGCACCTACACCTCAGTTTGTAACAGTTACAAGCCTTCAAAAATGAAGTAGGAGTACTCAGGTGAGCTTGTGTGAATTACTCTTTTCCAGAGAAAGAAGTTATT	VAVKMLNVTAPTPQFVTVTSLQK*SRSTQVSLCELLFSRERSY	0	6	0	0	0	0		0	50.0977	0	0	0	0		16.6992	0		-1
TGTGGCAGTGAAAATGTTGAATGTGACAGCACCTACACCTCAGTCATTCAAAAATGAAGTAGGAGTACTCAGGTGAGCTTGTGTGAATTACTCTTTTCCAGAGAAAGAAGTTATTTTTATTAGCTCCTGGT	VAVKMLNVTAPTPQSFKNEVGVLR*ACVNYSFPEKEVIFISSW	0	6	0	0	0	0		0	50.0977	0	0	0	0		16.6992	0		-1
TGTGGCAGTGAAAATGTTGAATGTGACAGCACCTACACCTCAGCCTTCAAAATGAAGCTGAGTACTCAAAAATTACAAGCCTTCAAAAATGAAGTAGGAGTACTCAGGTGAGCTTGTGTGAATTACTCTTT	VAVKMLNVTAPTPQPSK*S*VLKNYKPSKMK*EYSGELV*ITL	0	6	0	0	0	0		0	50.0977	0	0	0	0		16.6992	0		-1
TGTGGCAGTGAAAATGTTGAATGTGACAGCACCTACACCTCAGAATCAAGCCTTCAAAAATGAAGTAGGAGTACTCAGGTGAGCTTGTGTGAATTACTCTTTTCCAGAGAAAGAAGTTATTTTTATTAGCT	VAVKMLNVTAPTPQNQAFKNEVGVLR*ACVNYSFPEKEVIFIS	0	6	0	0	0	0		0	50.0977	0	0	0	0		16.6992	0		-1
TGTGGCAGTGAAAATGTTGAATGTGACAGCACCTACACCTCAAAATGTAGGTGTAGGTGATATAGCCTTCAAAAATGAAGTAGGAGTACTCAGGTGAGCTTGTGTGAATTACTCTTTTCCAGAGAAAGAAG	VAVKMLNVTAPTPQNVGVGDIAFKNEVGVLR*ACVNYSFPEKE	0	6	0	0	0	0		0	50.0977	0	0	0	0		16.6992	0		-1
TGTGGCAGTGAAAATGTTGAATGTGACAGCACCTACACCTCAGCCTTCAAGCCTTCAAAAATGAAGTAGGAGTACTCAGGTGAGCTTGTGTGAATTACTCTTTTCCAGAGAAAGAAGTTATTTTTATTAGC	VAVKMLNVTAPTPQPSSLQK*SRSTQVSLCELLFSRERSYFY*	5	0	0	4	2	10		48.1348	0	0	39.1512	17.6389	90.1892		16.0449	48.9931		0.327494
TGTGGCAGTGAAAATGTTGAATGTGACAGCACCTACACCTCAGTGAGCTTGTGTGAATTACTCTTTTCCAGAGAAAGAAGTTATTTTTATTAGCTCCTGGTTCCCAGTGGACAGTGCAGGGGAAAGAATAG	VAVKMLNVTAPTPQ*ACVNYSFPEKEVIFISSWFPVDSAGERI	5	0	0	3	0	9		48.1348	0	0	29.3634	0	81.1703		16.0449	36.8446		0.435476
TGTGGCAGTGAAAATGTTGAATGTGACAGCACCTACACCTCAGCACACAGTTACAAGCCTTCAAAAATGAAGTAGGAGTACTCAGGTGAGCTTGTGTGAATTACTCTTTTCCAGAGAAAGAAGTTATTTTT	VAVKMLNVTAPTPQHTVTSLQK*SRSTQVSLCELLFSRERSYF	5	0	0	3	1	6		48.1348	0	0	29.3634	8.81943	54.1135		16.0449	30.7655		0.521524
TGTGGCAGTGAAAATGTTGAATGTGACAGCAGGAGTACTCAGGTGAGCTTGTGTGAATTACTCTTTTCCAGAGAAAGAAGTTATTTTTATTAGCTCCTGGTTCCCAGTGGACAGTGCAGGGGAAAGAATAG	VAVKMLNVTAGVLR*ACVNYSFPEKEVIFISSWFPVDSAGERI	5	0	0	1	2	4		48.1348	0	0	9.7878	17.6389	36.0757		16.0449	21.1674		0.758
TGTGGCAGTGAAAATGTTGAATGTGACAGCACCTACACCAGGAGTACTCAGGTGAGCTTGTGTGAATTACTCTTTTCCAGAGAAAGAAGTTATTTTTATTAGCTCCTGGTTCCCAGTGGACAGTGCAGGGG	VAVKMLNVTAPTPGVLR*ACVNYSFPEKEVIFISSWFPVDSAG	5	0	0	0	0	3		48.1348	0	0	0	0	27.0568		16.0449	9.01892		1.77903
TGTGGCAGTGAAAATGTTGAATGTGACAGCACCTACACCTCAGTAGACAAGCCTTCAAAAATGAAGTAGGAGTACTCAGGTGAGCTTGTGTGAATTACTCTTTTCCAGAGAAAGAAGTTATTTTTATTAGC	VAVKMLNVTAPTPQ*TSLQK*SRSTQVSLCELLFSRERSYFY*	5	0	0	1	0	0		48.1348	0	0	9.7878	0	0		16.0449	3.2626		4.91783
TGTGGCAGTGAAAATGTTGAATGTGACAGCACCTACACCTCAGCTGTCAAAAATGAAGTAGGAGTACTCAGGTGAGCTTGTGTGAATTACTCTTTTCCAGAGAAAGAAGTTATTTTTATTAGCTCCTGGTT	VAVKMLNVTAPTPQLSKMK*EYSGELV*ITLFQRKKLFLLAPG	5	0	0	1	0	0		48.1348	0	0	9.7878	0	0		16.0449	3.2626		4.91783
TGTGGCAGTGAAAATGTTGAATGTGACAGCACCTACACCTCAAAAATGAAGTGTAGCCTTCAAAAATGAAGTAGGAGTACTCAGGTGAGCTTGTGTGAATTACTCTTTTCCAGAGAAAGAAGTTATTTTTA	VAVKMLNVTAPTPQK*SVAFKNEVGVLR*ACVNYSFPEKEVIF	5	0	0	1	0	0		48.1348	0	0	9.7878	0	0		16.0449	3.2626		4.91783
TGTGGCAGTGAAAATGTTGAATGTGACAGCACCTTTTGAAGCCTTCAAAAATGAAGTAGGAGTACTCAGGTGAGCTTGTGTGAATTACTCTTTTCCAGAGAAAGAAGTTATTTTTATTAGCTCCTGGTTCC	VAVKMLNVTAPFEAFKNEVGVLR*ACVNYSFPEKEVIFISSWF	5	0	0	1	0	0		48.1348	0	0	9.7878	0	0		16.0449	3.2626		4.91783
TGTGGCAGTGAAAATGTTGAATGTGACAGCACCTACACCTCATTTTTGAAGCCTTCAAAAATGAAGTAGGAGTACTCAGGTGAGCTTGTGTGAATTACTCTTTTCCAGAGAAAGAAGTTATTTTTATTAGC	VAVKMLNVTAPTPHF*SLQK*SRSTQVSLCELLFSRERSYFY*	5	0	0	0	0	1		48.1348	0	0	0	0	9.01892		16.0449	3.00631		5.33709
TGTGGCAGTGAAAATGTTGAATGTGACAGCACCTACACCTCAAGCCTTCAAAAATGAAGTAGGAGTACTCAGGTGAGCTTGCGTGAATTACTCTTTTCCAGAGAAAGAAGTTATTTTTATTAGCTCCTGGT	VAVKMLNVTAPTPQAFKNEVGVLR*ACVNYSFPEKEVIFISSW	5	0	0	0	0	1		48.1348	0	0	0	0	9.01892		16.0449	3.00631		5.33709
TGTGGCAGTGAAAATGTTGAATGTGACAGCACCTACACCTCAGCCTTCAAAAATGAAGTAGGAGTACAAGCCTTCAAAAATGAAGTAGGAGTACTCAGGTGAGCTTGTGTGAATTACTCTTTTCCAGAGAA	VAVKMLNVTAPTPQPSKMK*EYKPSKMK*EYSGELV*ITLFQR	5	0	0	0	1	0		48.1348	0	0	0	8.81943	0		16.0449	2.93981		5.45781
TGTGGCAGTGAAAATGTTGAATGTGACAGCACCTACACCTTCAAAAATGAAGCCTTCAAAATGAAGTAGGAGTACTCAGGTGAGCTTGTGTGAATTACTCTTTTCCAGAGAAAGAAGTTATTTTTATTAGC	VAVKMLNVTAPTPSKMKPSK*SRSTQVSLCELLFSRERSYFY*	5	0	0	0	0	0		48.1348	0	0	0	0	0		16.0449	0		-1
TGTGGCAGTGAAAATGTTGAATGTGACAGCACCTACACCTTTTTTTGAAGGTTACAAGCCTTCAAAAATGAAGTAGGAGTACTCAGGTGAGCTTGTGTGAATTACTCTTTTCCAGAGAAAGAAGTTATTTT	VAVKMLNVTAPTPFFEGYKPSKMK*EYSGELV*ITLFQRKKLF	5	0	0	0	0	0		48.1348	0	0	0	0	0		16.0449	0		-1
TGTGGCAGTGAAAATGTTGAATGTGACAGCACCTACACCTCAGAAAGGAGAAAGAAAGAAAGAAAAGAAAGAAAGGAAGAAAGAAAGAAAGAGAGGGAGAGAGACAGTTACAAGCCTTCAAAAATGAAGTA	VAVKMLNVTAPTPQKGERKKEKKERKKERKRGRETVTSLQK*S	5	0	0	0	0	0		48.1348	0	0	0	0	0		16.0449	0		-1
TGTGGCAGTGAAAATGTTGAATGTGACAGCACCTAAAACAGTTACAAGCCTTCAAAAATGAAGTAGGAGTACTCAGGTGAGCTTGTGTGAATTACTCTTTTCCAGAGAAAGAAGTTATTTTTATTAGCTCC	VAVKMLNVTAPKTVTSLQK*SRSTQVSLCELLFSRERSYFY*L	5	0	0	0	0	0		48.1348	0	0	0	0	0		16.0449	0		-1
TGTGGCAGTGAAAATGTTGAATGTGACAGCTGTTACAAGCCTTCAAAAATGAAGTAGGAGTACTCAGGTGAGCTTGTGTGAATTACTCTTTTCCAGAGAAAGAAGTTATTTTTATTAGCTCCTGGTTCCCA	VAVKMLNVTAVTSLQK*SRSTQVSLCELLFSRERSYFY*LLVP	5	0	0	0	0	0		48.1348	0	0	0	0	0		16.0449	0		-1
TGTGGCAGTGAAAATGAAGTAGGAGTACTTCATTTTCAAAATGAAGTAGGAGTACTCAGGTGAGCTTGTGTGAATTACTCTTTTCCAGAGAAAGAAGTTATTTTTATTAGCTCCTGGTTCCCAGTGGACAG	VAVKMK*EYFIFKMK*EYSGELV*ITLFQRKKLFLLAPGSQWT	5	0	0	0	0	0		48.1348	0	0	0	0	0		16.0449	0		-1
TGTGGCAGTGAAAATGTGGCAGCCTTCAAAAATGAAGTAGGAGTACTCAGGTGAGCTTGTGTGAATTACTCTTTTCCAGAGAAAGAAGTTATTTTTATTAGCTCCTGGTTCCCAGTGGACAGTGCAGGGGA	VAVKMWQPSKMK*EYSGELV*ITLFQRKKLFLLAPGSQWTVQG	5	0	0	0	0	0		48.1348	0	0	0	0	0		16.0449	0		-1
TGTGGCAGTGAAAATGTTGAATGTGACAGCACCTACACCTCCTGGTTCCCAGTGGACAGTGCAGGGGAAAGAATAGTAGAAGATCGGAAGAGCACACGTCTGAACTCCAGTCACGGTCCACGATCTCGTAT	VAVKMLNVTAPTPPGSQWTVQGKE**KIGRAHV*TPVTVHDLV	5	0	0	0	0	0		48.1348	0	0	0	0	0		16.0449	0		-1
TGTGGCAGTGAAAATGTTGAATGTGACAGCACCTACACCTCAGTTACAAGCCTTCAAAATGTTGAATGTGACAGCACCTACACCTCAGTTACAAGCCTTCAAAAATGAAGTAGGAGTACTCAGGTGAGCTT	VAVKMLNVTAPTPQLQAFKMLNVTAPTPQLQAFKNEVGVLR*A	5	0	0	0	0	0		48.1348	0	0	0	0	0		16.0449	0		-1
TGTGGCAGTGAAAATGTTGAATGTGACAGCACCTACACCTCAGTTACAACATATATATACAAGCCTTCAAAAATGAAGTAGGAGTACTCAGGTGAGCTTGTGTGAATTACTCTTTTCCAGAGAAAGAAGTT	VAVKMLNVTAPTPQLQHIYTSLQK*SRSTQVSLCELLFSRERS	5	0	0	0	0	0		48.1348	0	0	0	0	0		16.0449	0		-1
TGTGGCAGTGAAAATGTTGAATGTGACAGCACCTACACCTCAGCCTTCAAAAATTTACAAGTTTTGAAGTTACAAGCCTTCAAAAATGAAGTAGGAGTACTCAGGTGAGCTTGTGTGAATTACTCTTTTCC	VAVKMLNVTAPTPQPSKIYKF*SYKPSKMK*EYSGELV*ITLF	5	0	0	0	0	0		48.1348	0	0	0	0	0		16.0449	0		-1
TGTGGCAGTGAAAATGTTGAATGTGACAGCACCTACACCCCCCAAAATGAAGCCTTCAAAAATGAAGTAGGAGTACTCAGGTGAGCTTGTGTGAATTACTCTTTTCCAGAGAAAGAAGTTATTTTTATTAG	VAVKMLNVTAPTPPKMKPSKMK*EYSGELV*ITLFQRKKLFLL	5	0	0	0	0	0		48.1348	0	0	0	0	0		16.0449	0		-1
TGTGGCAGTGAAAATGTTGAATGTCACCTGTGTGAATTACTCTTTTCCAGAGAAAGAAGTTATTTTTATTAGCTCCTGGTTCCCAGTGGACAGTGCAGGGGAAAGAATAGTAGAAGATCGGAAGAGCACAC	VAVKMLNVTCVNYSFPEKEVIFISSWFPVDSAGERIVEDRKST	5	0	0	0	0	0		48.1348	0	0	0	0	0		16.0449	0		-1
TGTTGCAGTGAAAATGTTGAATGTGACAGCACCTACACCTCAAACAAGCCTTCAAAAATGAAGTAGGAGTACTCAGGTGAGCTTGTGTGAATTACTCTTTTCCAGAGAAAGAAGTTATTTTTATTAGCTCC	VAVKMLNVTAPTPQTSLQK*SRSTQVSLCELLFSRERSYFY*L	5	0	0	0	0	0		48.1348	0	0	0	0	0		16.0449	0		-1
TGTGGCAGTGAAAATGTTGAATGTGACAGCACCTACACCTCAGTTACAAGCCTTCAAAAATGAAGTAGGAGTACTCAGGTGAGCTTGTGTGAATTACTCTTTTCCAGAGAAAAGAAAGAAGTTATTTTTAT	VAVKMLNVTAPTPQLQAFKNEVGVLR*ACVNYSFPEKRKKLFL	5	0	0	0	0	0		48.1348	0	0	0	0	0		16.0449	0		-1
TGTGGCAGTGAAAATGTTGAATGTGACAGCACCTACACCTCAGAGTGAGTTACAAGCCTTCAAAAATGAAGTAGGAGTACTCAGGTGAGCTTGTGTGAATTACTCTTTTCCAGAGAAAGAAGTTATTTTTA	VAVKMLNVTAPTPQSELQAFKNEVGVLR*ACVNYSFPEKEVIF	5	0	0	0	0	0		48.1348	0	0	0	0	0		16.0449	0		-1
TGTGGCAGTGAAAATGTTGAATGTGACAGCACCTACACATTGAAGTAGGAGTACTCAGGTGAGCTTGTGTGAATTACTCTTTTCCAGAGAAAGAAGTTATTTTTATTAGCTCCTGGTTCCCAGTGGACAGT	VAVKMLNVTAPTH*SRSTQVSLCELLFSRERSYFY*LLVPSGQ	5	0	0	0	0	0		48.1348	0	0	0	0	0		16.0449	0		-1
TGTGGCAGTGAAAATGTTGAATGTGACAGCACCTACAAAAAAGTTACAAGCCTTCAAAAATGAAGTAGGAGTACTCAGGTGAGCTTGTGTGAATTACTCTTTTCCAGAGAAAGAAGTTATTTTTATTAGCT	VAVKMLNVTAPTKKLQAFKNEVGVLR*ACVNYSFPEKEVIFIS	5	0	0	0	0	0		48.1348	0	0	0	0	0		16.0449	0		-1
TGTGGCAGTGAAAATGTTGAATGAACATTTTCAAAATTCAAAAATGAAGTAGGAGTACTCAGGTGAGCTTGTGTGAATTACTCTTTTCCAGAGAAAGAAGTTATTTTTATTAGCTCCTGGTTCCCAGTGGA	VAVKMLNEHFQNSKMK*EYSGELV*ITLFQRKKLFLLAPGSQW	5	0	0	0	0	0		48.1348	0	0	0	0	0		16.0449	0		-1
TGTGGCAGTGAAAATGTTGAATGTGACAGCACCTACACCTCAGCCTTCAAAATGTTACAAGCCTTCAAAAATGTTACAAAAAATGTTACAAAAAAGGTTACAAGCCTTCAAAAATGAAGTAGGAGTACTCA	VAVKMLNVTAPTPQPSKCYKPSKMLQKMLQKRLQAFKNEVGVL	5	0	0	0	0	0		48.1348	0	0	0	0	0		16.0449	0		-1
TGTGGCAGTGAAAATGTTGAATGTGACAGCACCTACACCTCAGCAAGCCTTTGAACAAGCCTTCAAAAATGAAGTAGGAGTACTCAGGTGAGCTTGTGTGAATTACTCTTTTCCAGAGAAAGAAGTTATTT	VAVKMLNVTAPTPQQAFEQAFKNEVGVLR*ACVNYSFPEKEVI	5	0	0	0	0	0		48.1348	0	0	0	0	0		16.0449	0		-1
TGTGGCAGTGAAAATGTTGAATGTGACAGCACCTACACCTCAGTTACAAGTTACAAGCTACAAGTTACAAGTTACAAGTTACAAGCCTTCAAAAATGAAGTAGGAGTACTCAGGTGAGCTTGTGTGAATTA	VAVKMLNVTAPTPQLQVTSYKLQVTSYKPSKMK*EYSGELV*I	5	0	0	0	0	0		48.1348	0	0	0	0	0		16.0449	0		-1
TGTGGCAGTGAAAATGTTGAATGTGACAGCACCTACACCTCAGGTGTAGGTGCTGTCACACCTACACCTGAGCCTTCAAAAATGAAGTAGGAGTACTCAGGTGAGCTTGTGTGAATTACTCTTTTCCAGAG	VAVKMLNVTAPTPQV*VLSHLHLSLQK*SRSTQVSLCELLFSR	5	0	0	0	0	0		48.1348	0	0	0	0	0		16.0449	0		-1
TGTGGCAGTGAAAATGTTGAATGTGACAGCACCTACACCTCAAAATGTACAAGCCTTCAAAATGAAGCACCTACAAGCCTTCAAAAATGAAGTAGGAGTACTCAGGTGAGCTTGTGTGAATTACTCTTTTC	VAVKMLNVTAPTPQNVQAFKMKHLQAFKNEVGVLR*ACVNYSF	5	0	0	0	0	0		48.1348	0	0	0	0	0		16.0449	0		-1
TGTGGCAGTGAAAATGAAATGAAGGCAGTTACAAGCCTTCAAAAATGAAGTAGGAGTACTCAGGTGAGCTTGTGTGAATTACTCTTTTCCAGAGAAAGAAGTTATTTTTATTAGCTCCTGGTTCCCAGTGG	VAVKMK*RQLQAFKNEVGVLR*ACVNYSFPEKEVIFISSWFPV	5	0	0	0	0	0		48.1348	0	0	0	0	0		16.0449	0		-1
TGTGGCAGTGAAAATGTTGAATGTGACAGCACCTACACCTCAGCAGTTACAAGCCTTCAAAAATGAAGTAGGGGTACTCAGGTGAGCTTGTGTGAATTACTCTTTTCCAGAGAAAGAAGTTATTTTTATTA	VAVKMLNVTAPTPQQLQAFKNEVGVLR*ACVNYSFPEKEVIFI	4	0	1	49	58	8		38.5078	0	8.42737	479.602	511.527	72.1514		15.6451	354.427		0.0441419
TGTGGCAGTGAAAATGTTGAATGTGCCTTCAAAAATGAAGTAGGAGTACTCAGGTGAGCTTGTGTGAATTACTCTTTTCCAGAGAAAGAAGTTATTTTTATTAGCTCCTGGTTCCCAGTGGACAGTGCAGG	VAVKMLNVPSKMK*EYSGELV*ITLFQRKKLFLLAPGSQWTVQ	4	0	1	6	10	12		38.5078	0	8.42737	58.7268	88.1943	108.227		15.6451	85.0494		0.183953
TGTGGCAGTGAAAATGTTGAATGTGACAGCACCTACACCTCAGTTGAAGTAGGAGTACTCAGGTGAGCTTGTGTGAATTACTCTTTTCCAGAGAAAGAAGTTATTTTTATTAGCTCCTGGTTCCCAGTGGA	VAVKMLNVTAPTPQLK*EYSGELV*ITLFQRKKLFLLAPGSQW	4	0	1	4	4	2		38.5078	0	8.42737	39.1512	35.2777	18.0378		15.6451	30.8223		0.50759
TGTGGCAGTGAAAATGTTGAATGTGACAGCACCCGCAGTTACAAGCCTTCAAAAATGAAGTAGGAGTACTCAGGTGAGCTTGTGTGAATTACTCTTTTCCAGAGAAAGAAGTTATTTTTATTAGCTCCTGG	VAVKMLNVTAPAVTSLQK*SRSTQVSLCELLFSRERSYFY*LL	4	0	1	0	0	9		38.5078	0	8.42737	0	0	81.1703		15.6451	27.0568		0.578231
TGTGGCAGTGAAAATGTTGAATGTGACAGCACCTACACCAAGTTACAAGCCTTCAAAAATGAAGTAGGAGTACTCAGGTGAGCTTGTGTGAATTACTCTTTTCCAGAGAAAGAAGTTATTTTTATTAGCTC	VAVKMLNVTAPTPSYKPSKMK*EYSGELV*ITLFQRKKLFLLA	4	0	1	3	3	0		38.5078	0	8.42737	29.3634	26.4583	0		15.6451	18.6072		0.840806
TGTGGCAGTGAAAATGTTGAATGTGACAGAAGCCTTCAAAAATGAAGTAGGAGTACTCAGGTGAGCTTGTGTGAATTACTCTTTTCCAGAGAAAGAAGTTATTTTTATTAGCTCCTGGTTCCCAGTGGACA	VAVKMLNVTEAFKNEVGVLR*ACVNYSFPEKEVIFISSWFPVD	4	0	1	2	0	2		38.5078	0	8.42737	19.5756	0	18.0378		15.6451	12.5378		1.24783
TGTGGCAGTGAAAATGTTGAATGTGACAGCACCTACACCTCAGCCTTCAAAAATGAAGTAGGAGTACTCAGGTGAGCTTGTGTGAATTACTCTTCTCCAGAGAAAGAAGTTATTTTTATTAGCTCCTGGTT	VAVKMLNVTAPTPQPSKMK*EYSGELV*ITLLQRKKLFLLAPG	4	0	1	1	2	1		38.5078	0	8.42737	9.7878	17.6389	9.01892		15.6451	12.1485		1.28782
TGTGGCAGTGAAAATGTTGAATGTGACAGCACCTACACCTCAAAATGAAGTAGGAGTACTTCAAGCCTTCAAAAATGAAGTAGGAGTACTCAGGTGAGCTTGTGTGAATTACTCTTTTCCAGAGAAAGAAG	VAVKMLNVTAPTPQNEVGVLQAFKNEVGVLR*ACVNYSFPEKE	4	0	1	0	0	1		38.5078	0	8.42737	0	0	9.01892		15.6451	3.00631		5.20408
TGTGGCAGTGAAAATGTTGAATGTGACAGCAAATGAAGTAGGAGTACTCAGGTGAGCTTGTGTGAATTACTCTTTTCCAGAGAAAGAAGTTATTTTTATTAGCTCCTGGTTCCCAGTGGACAGTGCAGGGG	VAVKMLNVTANEVGVLR*ACVNYSFPEKEVIFISSWFPVDSAG	4	1	0	1	6	5		38.5078	8.34962	0	9.7878	52.9166	45.0946		15.6191	35.933		0.434674
TGTGGCAGTGAAAATGTTGAATGTGACAGCACCTACACCTCACATTCAGTTACAAGCCTTCAAAAATGAAGTAGGAGTACTCAGGTGAGCTTGTGTGAATTACTCTTTTCCAGAGAAAGAAGTTATTTTTA	VAVKMLNVTAPTPHIQLQAFKNEVGVLR*ACVNYSFPEKEVIF	4	1	0	0	0	0		38.5078	8.34962	0	0	0	0		15.6191	0		-1
TGTGGCAGTGAAAATGTTGAATGTGACAGCACCTACACCTCAGAACAAGCCTTCAAAAATGAAGTAGGAGTACTCAGGTGAGCTTGTGTGAATTACTCTTTTCCAGAGAAAGAAGTTATTTTTATTAGCTC	VAVKMLNVTAPTPQNKPSKMK*EYSGELV*ITLFQRKKLFLLA	3	0	2	2	1	6		28.8809	0	16.8547	19.5756	8.81943	54.1135		15.2452	27.5029		0.554313
TGTGGCAGTGAAAATGTTGAATGTGACAGCACCTACACCTCAAATACAAGCCTTCAAAAATGAAGTAGGAGTACTCAGGTGAGCTTGTGTGAATTACTCTTTTCCAGAGAAAGAAGTTATTTTTATTAGCT	VAVKMLNVTAPTPQIQAFKNEVGVLR*ACVNYSFPEKEVIFIS	3	0	2	3	0	2		28.8809	0	16.8547	29.3634	0	18.0378		15.2452	15.8004		0.964861
TGTGGCAGTGAAAATGTTGAATGTGACAGCACCTACACCTCAGCCTTCAAAAATGAAGTAGGAGTACTCAGGTGAGCTTGTGTGAATTACTCTTTTCCAGAGAAAGAAGTTATTTTTATTAGCTCCTGGCT	VAVKMLNVTAPTPQPSKMK*EYSGELV*ITLFQRKKLFLLAPG	3	0	2	0	2	2		28.8809	0	16.8547	0	17.6389	18.0378		15.2452	11.8922		1.28195
TGTGGCAGTGAAAATGTTGAATGTGACAGCACCTACACCTCAGTTACAAGCCTTCAAACATGACGTAGGAGTACTCAGGTGAGCTTGTGTGAATTACTCTTTTCCAGAGAAAGAAGTTATTTTTATTAGCT	VAVKMLNVTAPTPQLQAFKHDVGVLR*ACVNYSFPEKEVIFIS	3	0	2	0	0	0		28.8809	0	16.8547	0	0	0		15.2452	0		-1
TGTGGCAGTGAAAATGTTGAATGTGACAGACCTACACCTCAGTTACAAGCCTTCAAAAATGAAGTAGGAGTACTCAGGTGAGCTTGTGTGAATTACTCTTTTCCAGAGAAAGAAGTTATTTTTATTAGCTC	VAVKMLNVTDLHLSYKPSKMK*EYSGELV*ITLFQRKKLFLLA	3	0	2	0	0	0		28.8809	0	16.8547	0	0	0		15.2452	0		-1
TGTGGCAGTGAAAATGTTGAATGTGACAGCACCTACACCTCCAGTTACAAGCCTTCAAAAATGAAGTAGGAGTACTCAGGTGAGCTTGTGTGAATTACTCTCTTCCAGAGAAAGAAGTTATTTTTATTAGC	VAVKMLNVTAPTPPVTSLQK*SRSTQVSLCELLSSRERSYFY*	3	1	1	2	2	11		28.8809	8.34962	8.42737	19.5756	17.6389	99.2081		15.2193	45.4742		0.33468
TGTGGCAGTGAAAATGTTGAATGTGACAGTTACAAGCCTTCAAAAATGAAGTAGGAGTACTCAGATGAGCTTGTGTGAATTACTCTTTTCCAGAGAAAGAAGTTATTTTTATTAGCTCCTGGTTCCCAGTG	VAVKMLNVTVTSLQK*SRSTQMSLCELLFSRERSYFY*LLVPS	3	1	1	3	0	2		28.8809	8.34962	8.42737	29.3634	0	18.0378		15.2193	15.8004		0.96322
TGTGGCAGTGAAAATGTTGAATGTGACAGCACCTACACCTTCAAAAATGAAGTAGGAGTACTCAGGTGAGCCTGTGTGAATTACTCTTTTCCAGAGAAAGAAGTTATTTTTATTAGCTCCTGGTTCCCAGT	VAVKMLNVTAPTPSKMK*EYSGEPV*ITLFQRKKLFLLAPGSQ	3	1	1	3	1	0		28.8809	8.34962	8.42737	29.3634	8.81943	0		15.2193	12.7276		1.19577
TGTGGCAGTGAAAATGTTGAGTGTGACAGCACCTACACAGTTACAAGCCTTCAAAAATGAAGTAGGAGTACTCAGGTGAGCTTGTGTGAATTACTCTTTTCCAGAGAAAGAAGTTATTTTTATTAGCTCCT	VAVKMLSVTAPTQLQAFKNEVGVLR*ACVNYSFPEKEVIFISS	3	1	1	0	0	1		28.8809	8.34962	8.42737	0	0	9.01892		15.2193	3.00631		5.06245
TGTGGCAGTGAAAATGTTGAATGTGACAGCACCTACACCTCAGTTACAAGCCTTCAAAAATGAAGTAGGAGTACTCAGGTGAGCTTGTGTGAATTACTCTTTTCCTGTGAAAGAAGTTATTTTTATTAGCT	VAVKMLNVTAPTPQLQAFKNEVGVLR*ACVNYSFPVKEVIFIS	3	1	1	0	0	0		28.8809	8.34962	8.42737	0	0	0		15.2193	0		-1
TGTGGCAGTGAAAATGTTGAATGTGACAGCACCTACACCTCAGCTACAAGCCTTCAAGAATGAAGTAGGAGTACTCAGGTGAGCTTGTGTGAATTACTCTTTTCCAGAGAAAGAAGTTATTTTTATTAGCT	VAVKMLNVTAPTPQLQAFKNEVGVLR*ACVNYSFPEKEVIFIS	3	1	1	0	0	0		28.8809	8.34962	8.42737	0	0	0		15.2193	0		-1
TGTGGCAGTGAAAATGTTGAAAATGAAGTAGGAGTACTCAGGTGAGCTTGTGTGAATTACTCTTTTCCAGAGAAAGAAGTTATTTTTATTAGCTCCTGGTTCCCAGTGGACAGTGCAGGGGAAAGAATAGT	VAVKMLKMK*EYSGELV*ITLFQRKKLFLLAPGSQWTVQGKE*	3	2	0	11	12	6		28.8809	16.6992	0	107.666	105.833	54.1135		15.1934	89.2042		0.170321
TGTGGCAGTGAAAATGTTGAATGTGACAGCACCTACACCTCAGCCTTCAAAAATGAAGCCTTCAAAAATGAAGTAGGAGTACTCAGGTGAGCTTGTGTGAATTACTCTTTTCCAGAGAAAGAAGTTATTTT	VAVKMLNVTAPTPQPSKMKPSKMK*EYSGELV*ITLFQRKKLF	3	2	0	7	6	7		28.8809	16.6992	0	68.5146	52.9166	63.1325		15.1934	61.5212		0.246961
TGTGGCAGTGAAAATGTTGAATGTGACAATGAAGTAGGAGTACTCAGGTGAGCTTGTGTGAATTACTCTTTTCCAGAGAAAGAAGTTATTTTTATTAGCTCCTGGTTCCCAGTGGACAGTGCAGGGGAAAG	VAVKMLNVTMK*EYSGELV*ITLFQRKKLFLLAPGSQWTVQGK	3	2	0	2	0	4		28.8809	16.6992	0	19.5756	0	36.0757		15.1934	18.5504		0.81903
TGTGGCAGTGAAAATGTTGAATGTGACAGCACCTACACCTCCAGTTACAAGCCTTCGAAAATGAAGTAGGAGTACTCAGGTGAGCTTGTGTGAATTACTCTTTTCCAGAGAAAGAAGTTATTTTTATTAGC	VAVKMLNVTAPTPPVTSLRK*SRSTQVSLCELLFSRERSYFY*	2	0	3	1	4	7		19.2539	0	25.2821	9.7878	35.2777	63.1325		14.8453	36.066		0.411616
TGTGGCAGTGAAAATGTTGAATGTGACAGCACCTACACCTCCAGTTACAAGCATTCAAAAATGAAGTAGGAGTACTCAGGTGAGCTTGTGTGAATTACTCTTTTCCAGAGAAAGAAGTTATTTTTATTAGC	VAVKMLNVTAPTPPVTSIQK*SRSTQVSLCELLFSRERSYFY*	2	0	3	1	4	3		19.2539	0	25.2821	9.7878	35.2777	27.0568		14.8453	24.0408		0.617507
TGTGGCAGTGAAAATGTTGAATGTGACAGCACCTACACCTCCAGTTACAAGACTTCAAAAATGAAGTAGGAGTACTCAGGTGAGCTTGTGTGAATTACTCTTTTCCAGAGAAAGAAGTTATTTTTATTAGC	VAVKMLNVTAPTPPVTRLQK*SRSTQVSLCELLFSRERSYFY*	2	0	3	0	0	1		19.2539	0	25.2821	0	0	9.01892		14.8453	3.00631		4.93806
TGTGGCAGTGAAAATGTTGAATGTGACAGCACCTACACCTCAGCAGCTACAAGCCTTCAAAAATGAAGTAGGAGTACTCAGGTGAGCTTGTGTGAATTACTCTTTTCCAGAGAAAGAAGTTATTTTTATTA	VAVKMLNVTAPTPQQLQAFKNEVGVLR*ACVNYSFPEKEVIFI	2	1	2	43	62	15		19.2539	8.34962	16.8547	420.875	546.805	135.284		14.8194	367.655		0.040308
TGTGGCAGTGAAAATGTTGAATGTGACAGCACCTACACCACCAGTTACAAGCCTTCAAAAATGAAGTAGGAGTACTCAGGTGAGCTTGTGTGAATTACTCTTTTCCAGAGAAAGAAGTTATTTTTATTAGC	VAVKMLNVTAPTPPVTSLQK*SRSTQVSLCELLFSRERSYFY*	2	1	2	4	2	7		19.2539	8.34962	16.8547	39.1512	17.6389	63.1325		14.8194	39.9742		0.370725
TGTGGCAGTGAAAATGTTGAATGTGACAGCACCTACACCTCACAGTTACAAGCCTTCGAAAATGAAGTAGGAGTACTCAGGTGAGCTTGTGTGAATTACTCTTTTCCAGAGAAAGAAGTTATTTTTATTAG	VAVKMLNVTAPTPHSYKPSKMK*EYSGELV*ITLFQRKKLFLL	2	1	2	2	0	4		19.2539	8.34962	16.8547	19.5756	0	36.0757		14.8194	18.5504		0.798872
TGTGGCAGTGAAAATGTTGAATGTGACAGCACCTACACCTCCAGTTACAAACCTTCAAAAATGAAGTAGGAGTACTCAGGTGAGCTTGTGTGAATTACTCTTTTCCAGAGAAAGAAGTTATTTTTATTAGC	VAVKMLNVTAPTPPVTNLQK*SRSTQVSLCELLFSRERSYFY*	2	1	2	0	0	4		19.2539	8.34962	16.8547	0	0	36.0757		14.8194	12.0252		1.23236
TGTGGCAGTGAAAATGTTGAATGTTACAAGCCTTCAAAAATGAAGTAGGAGTACTCAAGTGAGCTTGTGTGAATTACTCTTTTCCAGAGAAAGAAGTTATTTTTATTAGCTCCTGGTTCCCAGTGGACAGT	VAVKMLNVTSLQK*SRSTQVSLCELLFSRERSYFY*LLVPSGQ	2	1	2	3	0	0		19.2539	8.34962	16.8547	29.3634	0	0		14.8194	9.7878		1.51407
TGTGGCAGTGAAAATGTTGAATGTGACAGCACCTACACCTCACAGTTACAAGCCTTCAAAAATGAAGTAGGAGTACTCAGGTGAGCTTGTGTGAATTACTCTTTTCCAGAGAAAGAAGTTATTTTATTAGC	VAVKMLNVTAPTPHSYKPSKMK*EYSGELV*ITLFQRKKLFY*	2	1	2	2	0	1		19.2539	8.34962	16.8547	19.5756	0	9.01892		14.8194	9.53151		1.55478
TGTGGCAGTGAAAATGTTGAATGTGACAGCACCTACACCTCAGCACAGTTACAAGCCTTCAAAAATGAAGTAGGAGTACTCAGGCGAGCTTGTGTGAATTACTCTTTTCCAGAGAAAGAAGTTATTTTTAT	VAVKMLNVTAPTPQHSYKPSKMK*EYSGELV*ITLFQRKKLFL	2	1	2	1	1	0		19.2539	8.34962	16.8547	9.7878	8.81943	0		14.8194	6.20241		2.3893
TGTGGCAGTGAAAATGGTGAATGTGACAGCACCTACACAGTTACAAGCCTTCAAAAATGAAGTAGGAGTACTCAGGTGAGCTTGTGTGAATTACTCTTTTCCAGAGAAAGAAGTTATTTTTATTAGCTCCT	VAVKMVNVTAPTQLQAFKNEVGVLR*ACVNYSFPEKEVIFISS	2	1	2	0	0	0		19.2539	8.34962	16.8547	0	0	0		14.8194	0		-1
TGTGGCAGTGAAAATGTTGAATGTGACAGCACCTACACCTCAGCAGTTACAAGCCTTCAAAAATGAAGTAGGAGTACTCAGGTGAGCTTGTGTGAATTACCCTTTTCCAGAGAAAGAAGTTATTTTTATTA	VAVKMLNVTAPTPQQLQAFKNEVGVLR*ACVNYPFPEKEVIFI	2	2	1	54	52	10		19.2539	16.6992	8.42737	528.541	458.61	90.1892		14.7935	359.114		0.0411945
TGTGGCAGTGAAAATGTTGAATGTGACAGCACCTACACCTCAGCAGTTACAAGCCTTCAAAAATGAAGTAGGAGTACTCAGGTGAGCTTGTGTGAATTACTCTTTTCCAGGGAAAGAAGTTATTTTTATTA	VAVKMLNVTAPTPQQLQAFKNEVGVLR*ACVNYSFPGKEVIFI	2	2	1	42	47	5		19.2539	16.6992	8.42737	411.088	414.513	45.0946		14.7935	290.232		0.0509713
[truncated: 6,690 more rows]
